1 Genome-enabled inference of functional genetic variants in the face, brain and behavior

2

3

4

5 Chinar Patil<sup>1</sup>, Jonathan B. Sylvester<sup>1,2</sup>, Kawther Abdilleh<sup>1</sup>, Michael W. Norsworthy<sup>3,4</sup>,  
6 Karen Pottin<sup>5</sup>, Milan Malinsky<sup>6,7</sup>, Ryan F. Bloomquist<sup>1,8</sup>, Zachary V. Johnson<sup>1</sup>, Patrick T.  
7 McGrath<sup>1</sup>, Jeffrey T. Streebman<sup>1</sup>

8

9

10 Affiliations:

11 <sup>1</sup>School of Biological Sciences and Petit Institute of Bioengineering and Bioscience,  
12 Georgia Institute of Technology, Atlanta, GA, USA.

13 <sup>2</sup>Department of Biology, Georgia State University, Atlanta, GA, USA

14 <sup>3</sup>Catalog Technologies Inc., Boston, MA, USA.

15 <sup>4</sup>Freedom of Form Foundation, Inc., Cambridge, MA, USA.

16 <sup>5</sup>Laboratoire de Biologie du Développement (IBPS-LBD, UMR7622), Sorbonne  
17 Université, CNRS, Institut de Biologie Paris Seine, Paris, France.

18 <sup>6</sup>Zoological Institute, Department of Environmental Sciences, University of Basel, Basel,  
19 Switzerland.

20 <sup>7</sup>Wellcome Trust Sanger Institute, Cambridge, United Kingdom.

21 <sup>8</sup>Augusta University, Department of Oral Biology and Diagnostic Sciences, Department  
22 of Restorative Sciences, Dental College of Georgia, Augusta, GA, USA.

23 Abstract

24 Lake Malawi cichlid fishes exhibit extensive divergence in form and function among  
25 closely related species separated by a relatively small number of genetic changes. During  
26 the past million years, hundreds of species have diversified along an ecological axis in  
27 rock vs. sand habitats. We compared the genomes of rock- and sand-dwelling species  
28 and asked which genetic variants in which genes differed among the groups. We found  
29 that 96% of differentiated variants reside in non-coding sequence but these non-coding  
30 diverged variants are evolutionarily conserved. The majority of divergent coding variants  
31 are missense and/or loss of function. Regions near differentiated variants are enriched  
32 for craniofacial, neural and behavioral functional categories. To follow up experimentally,  
33 we used rock- vs. sand- species and their hybrids to (i) clarify the push-pull roles of BMP  
34 signaling and *irx1b* in the specification of forebrain territories during gastrulation and (ii)  
35 reveal striking context-dependent brain gene expression during adult social behavior. Our  
36 results suggest compelling ties between early brain development and adult behavior and  
37 highlight the promise of evolutionary reverse genetics – the identification of functional  
38 variants from genome sequencing in natural populations.

## 39 Introduction

40 Our understanding of how the genome encodes natural variation in form and function is  
41 still limited. This is the case for almost any trait, from height to behavior to complex  
42 disease (Boyle, Li et al. 2017). The reasons for this are manifold, but they include an  
43 underappreciated role of non-coding genetic variants linked to differences in traits. This  
44 is apparent in our assumptions and in syntheses of data. For instance, only 25 years ago,  
45 experts thought that the human genome might contain 70,000 to over 100,000 genes to  
46 account for our complexity (Fields, Adams et al. 1994). More recently, it has been  
47 estimated that upwards of 93% of human disease related variants – traits for which we  
48 have the most data from genome wide association studies (GWAS) – reside in noncoding  
49 DNA sequence (Maurano, Humbert et al. 2012). Many of these noncoding variants are  
50 regulatory, that is, they affect the expression of genes (Degner, Pai et al. 2012).  
51 Therefore, despite a refined understanding of how single genes work in controlled cellular  
52 environments, it remains unclear how the genome is activated to produce natural  
53 phenotypes, and this may be particularly vexing for context-dependent processes like  
54 development or behavior.

55

56 Over the past two decades, systems have been developed to identify the genetic basis  
57 of traits from nature (Streelman, Peichel et al. 2007). Amongst vertebrate animals, these  
58 traits include body armor (Colosimo, Peichel et al. 2004), color (Kratochwil, Liang et al.  
59 2018), head and jaw shape (Albertson, Streelman et al. 2005, Shapiro, Kronenberg et al.  
60 2013, Lamichhaney, Berglund et al. 2015), parental care (Okhovat, Berrío et al. 2015,  
61 Bendesky, Kwon et al. 2017), song (Pfenning, Hara et al. 2014) and coordinated  
62 movement (Greenwood, Wark et al. 2013). The take home message from this work has  
63 been that a small number of genes from recognizable pathways explain a considerable  
64 proportion of phenotypic variance. Yet, these studies may be biased in interpretation and  
65 limited in inference space. The focus is typically on one or two species and one trait at a  
66 time, often using hybrid pedigrees founded by a small number of individuals, and  
67 candidate gene or QTL approaches. Here, we explored a different strategy in a system  
68 of many species with many divergent traits. We sought to determine the genetic  
69 differences between closely related groups of species and then to focus experiments on

70 leads from genome divergence. In essence, we've asked the genome which traits to  
71 follow.

72

73 The Malawi cichlid system is an apposite one for our research aims. The assemblage  
74 comprises hundreds of closely related species that have diversified in the last 500,000 to  
75 one million years (Kocher 2004), such that the genomes of individuals across species  
76 boundaries remain highly similar (Loh, Katz et al. 2008). An appreciable fraction of genetic  
77 polymorphism identified in Malawi species is shared with cichlid lineages from throughout  
78 East Africa -- suggesting that ancient genetic variation fuels diversification of the Malawi  
79 flock (Loh, Bezault et al. 2013). Set against this background of genome similarity, Malawi  
80 cichlids exhibit staggering diversity in phenotypes including pigmentation (Streelman,  
81 Albertson et al. 2003), sex determination (Roberts, Ser et al. 2009, Parnell and Streelman  
82 2013), craniofacial and brain patterning (Albertson, Streelman et al. 2005, Sylvester, Rich  
83 et al. 2010, Sylvester, Rich et al. 2013) and social behavior (York, Patil et al. 2018, Baran  
84 and Streelman 2020, Johnson, Moore et al. 2020). Previous work has focused on the  
85 genomic and early developmental underpinnings of this diversity, in rock- vs. sand-  
86 dwelling species (Loh, Katz et al. 2008, Fraser, Hulsey et al. 2009, Sylvester, Rich et al.  
87 2010, Sylvester, Rich et al. 2013).

88

89 Rock- vs. sand- species form ecologically distinct groups similar to other ecotypes in well-  
90 known adaptive radiations (marine vs. freshwater sticklebacks; tree vs. ground finches  
91 and anoles) (Streelman and Danley 2003). The main difference in this case is that each  
92 of the rock- and sand- groups contains more than 200 species. Recent divergence, rapid  
93 speciation and meta-population dynamics synergistically lead to the broad sharing of  
94 polymorphism across the rock-sand speciation continuum (Loh, Bezault et al. 2013,  
95 Malinsky, Svardal et al. 2018). Malawi rock-dwellers tend to be strongly territorial and  
96 aggressive; they breed and feed at high density in complex rock-reef habitats. Most eat  
97 algae from the substratum with strongly reinforced jaws packed with teeth. Adult rock-  
98 dweller brains exhibit enlarged anterior components, telencephala and olfactory bulbs.  
99 Sand-dwellers are less site-specific and less aggressive. They often breed on communal  
100 leks where males build sand 'bowers' to attract females (McKaye, Louda et al. 1990).

101 Many capture small prey using acute vision and fast-moving gracile jaws; their brains and  
102 sensory apparatus are elaborated for more posterior structures optic tecta, thalamus and  
103 eyes (SI Figure 1). We aimed to understand evolutionary divergence between rock- and  
104 sand-dwelling lineages by identifying the number, type and spectrum of genetic variants  
105 that separate these groups.

106

107 To target this primary axis of evolutionary divergence in the Lake Malawi species  
108 assemblage (Streelman and Danley 2003), we compared whole genomes of one male  
109 individual each from 8 rock-dwelling and from 14 sand-dwelling species (SI Table 1), to  
110 an average of 25X coverage per individual. Species were chosen to represent the  
111 diversity present within each of the rock- and sand- groups (Figure 1A), in terms of body  
112 size, color pattern, ecology and phylogenetically defined lineages within the sand- species  
113 group (Malinsky, Svardal et al. 2018).

## 114 **Results**

### 115 *The genomic signature of rock-sand divergence*

116 We compared the genomes of 8 rock dwellers and 14 sand dwellers to uncover the  
117 genomic signature of rock- versus sand- evolutionary diversification. We aligned  
118 sequence data to a reference genome of nearly 1 gigabase (Conte, Joshi et al. 2019) and  
119 identified approximately 22 million Single Nucleotide Polymorphisms (SNPs) and 200,000  
120 Insertion-Deletions (InDels). We calculated  $F_{ST}$  per variant, and averaged across 10kb  
121 windows, to quantify divergence between rock and sand species. We found that 0.06%  
122 of SNPs and 0.44% of InDels are alternately fixed between rock- and sand- groups. When  
123 these divergent variants and genome regions (2.5% FDR) are mapped to linkage groups  
124 (chromosomes), it is apparent that the signature of rock- vs. sand- divergence is  
125 distributed relatively evenly across the chromosomes (Figure 1B). Among fixed variants,  
126 3.5% were found in coding regions and 96.5% were predicted to be non-coding; ~17% in  
127 intergenic regions, 38% in introns, 38% in flanking regions (within 25kb up- or  
128 downstream of a gene), and 3% in annotated UTRs. Rock vs. sand fixed coding variants  
129 were more likely to be missense/loss-of-function (72.6%) than silent (27.3%).

130

131 We next generated whole-genome alignments of five published cichlid reference  
132 genomes from across East Africa (Brawand, Wagner et al. 2014) and estimated an  
133 evolutionary conservation score for each nucleotide position. Akin to phylogenetic  
134 footprinting, this approach allows inference of function for regions that are slower to  
135 change than others due to the long-term effect of purifying selection. For both coding and  
136 non-coding portions of the genome, we found that rock-sand divergence correlates  
137 positively with evolutionary conservation scores (Figure 1C), suggesting that  
138 differentiated rock-sand variants, including many non-coding variants, are enriched for  
139 function.

140

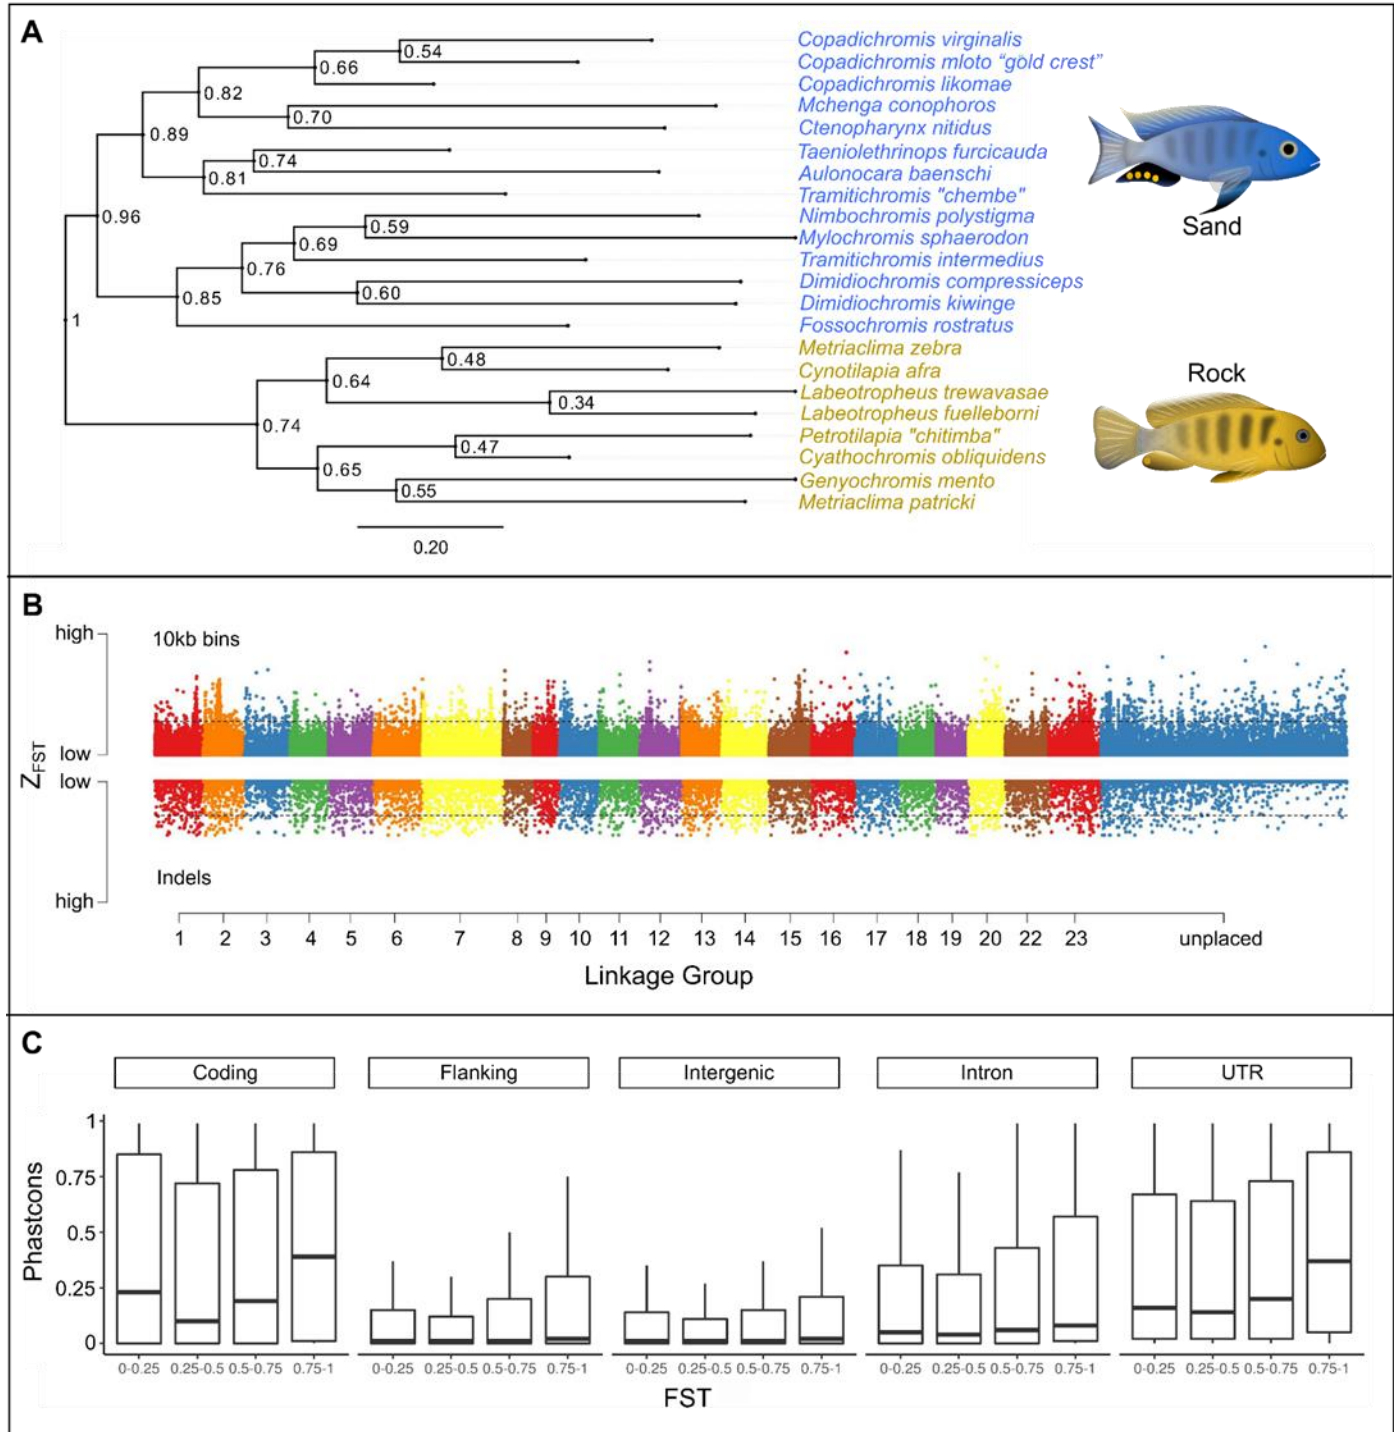

141  
142

143 Figure 1: The genomic substrate for rock vs. sand evolution | (A) A maximum likelihood  
144 phylogeny of eight rock- and fourteen sand-dwelling species, based on variable sites  
145 (informative SNP and InDels) identified throughout the genome. "Sand" species contain  
146 representatives of the lineages "shallow benthic, deep benthic and utaka" from (Malinsky,

147 Svardal et al. 2018), while the “rock” species correspond to the “mbuna” lineage. (B) A  
148 plot of Z- $F_{ST}$  ( $F_{ST}$  normalized using Fisher’s Z-transformation) across the genome, plotting  
149 genomic divergence between rock- vs. sand-dwelling groups. Single nucleotide  
150 polymorphisms (SNPs) summed over 10kb bins and insertion-deletion mutations (InDels)  
151 are shown on the same scale. Numbers along the x-axis refer to linkage groups (i.e.,  
152 chromosomes) and threshold lines indicate 2.5% FDR. (C) Evolutionary conservation  
153 (PhastCons) scores were calculated for each nucleotide across the genome, subdivided  
154 by genome annotation and plotted by bins of increasing  $F_{ST}$ . The PhastCons score for  
155 each genome category is significantly higher for increasing bins of  $F_{ST}$  (Wilcoxon rank  
156 sum p value < 2e-16).

157



158 A total of 4,484 genes lie within 25 kb of either an alternately fixed variant or a highly  
159 divergent 10kb window (2.5%FDR). Pathway enrichment analysis (Ben-Ari Fuchs, Lieder  
160 et al. 2016) of human homologs/analogs for these genes reveals categories spanning  
161 early embryonic development, craniofacial morphogenesis, brain development, synaptic  
162 transmission and neuronal function (SI Table 2). In particular, rock-sand divergent genes  
163 are enriched for GO Biological Process terms ‘telencephalon development’ ( $p < 1.7e-18$ ),  
164 ‘adult behavior’ ( $p < 2e-14$ ), ‘synaptic plasticity’ ( $p < 1.4e-12$ ), ‘odontogenesis’ ( $p < 3.7e-$   
165 11), ‘response to BMP’ ( $p < 3.2e-09$ ), ‘gastrulation’ ( $p < 5.6e-06$ ), ‘face morphogenesis’  
166 ( $p < 8.9e-08$ ), ‘neural crest cell differentiation’ ( $p < 4.3e-13$ ), and ‘eye development’ ( $p <$   
167 1.3e-15). Over-represented gene families included nuclear hormone receptors ( $p < 3.0e-$   
168 08), HOXL subclass homeoboxes ( $p < 1.4e-07$ ), TALE class homeoboxes ( $p < 4.2e-04$ )  
169 and Forkhead boxes ( $p < 9.33e-04$ ; for novel expression domains in cichlid *foxp2* see SI  
170 Figure 2). We observed enrichment for the mouse phenotypes ‘abnormal cognition’ ( $p <$   
171 3.3e-15), ‘abnormal learning and memory’ ( $p < 2.6e-15$ ), ‘abnormal craniofacial  
172 morphology’ ( $p < 4.9e-11$ ) and ‘abnormal social/conspecific interaction’ ( $p < 7.1e-14$ ). We  
173 used the list of differentiated genes to query an Allen Brain Atlas dataset that reports gene  
174 expression in hundreds of brain regions (Hawrylycz, Lein et al. 2012). Rock- sand-  
175 divergent genes were enriched for the basomedial nucleus of the amygdala, a sub-region  
176 of the telencephalon ( $p_{adj} = 0.001$ ) that regulates fear, anxiety, and physiological  
177 responses to territorial intruders in rodents (Adhikari, Lerner et al. 2015, Mesquita, Abreu  
178 et al. 2016), and has been linked to Social Anxiety Disorder in humans (Carvalho,  
179 Nóbrega et al. 2020). Finally, we queried databases of genes involved in human disease.  
180 Genes near divergent variants are significantly enriched for factors implicated in  
181 neurological disease like Autism Spectrum Disorder (SFARI (Abrahams, Arking et al.  
182 2013), Fisher’s exact test  $p$  value  $< 2e-16$ ) and disorders related to the neural crest  
183 (Piñero, Bravo et al. 2017), (Fisher’s exact test  $p$  value  $< 2e-16$ ).

184

185 Given the prevalence of evolutionarily conserved, non-coding, divergent rock-sand  
186 variants and genome-wide enrichment for craniofacial and neural crest biology, we  
187 examined overlap with published datasets of mammalian neural crest and craniofacial  
188 enhancers (Rada-Iglesias, Bajpai et al. 2012, Attanasio, Nord et al. 2013). These data

189 allow us to identify craniofacial and cranial neural crest cell (CNCC) enhancers conserved  
190 between mammals and cichlids and fixed variants between rock and sand species within  
191 these conserved regulatory elements. A total of 275 craniofacial enhancer elements and  
192 234 human CNCC enhancers are evolutionarily conserved between mammals and  
193 cichlids. We found divergent rock-sand mutations within the enhancer elements of key  
194 genes integral to CNCC specification and migration (SI Table 2). Notably, from both  
195 datasets, fixed rock-sand variants were found within the enhancer region of the gene  
196 *nr2f2*, a nuclear receptor and master neural crest regulator (Simoes-Costa and Bronner  
197 2015). Rock-sand divergent variants were similarly located within craniofacial enhancers  
198 of three genes (*yap1*, *fat4*, *rere*) that function in the Hippo signaling pathway, as well as  
199 within enhancers of *irx3* and *axin2*. These data linking rock-sand fixed SNP/InDels to  
200 evolutionarily conserved, experimentally verified enhancers further underscore the  
201 importance of non-coding variation in the craniofacial evolution of rock- and sand-  
202 lineages (Roberts, Hu et al. 2011).

203

204 Genome-wide divergence between rock vs. sand Malawi cichlids involves a relatively  
205 small percentage of genetic variants. Divergent variants are (a) predominantly non-  
206 coding, (b) in long-term evolutionarily conserved loci (c) enriched for genes and pathways  
207 involved in embryonic development, brain development, brain function and behavior, and  
208 craniofacial morphogenesis. Given these strong patterns of enrichment, we used the  
209 experimental power of the Malawi cichlid system to interrogate features of early  
210 development and adult behavior that differ between rock- and sand- groups.

211

### 212 *A gastrula-stage map of forebrain diversification*

213 Rock- vs. sand-dwelling Malawi cichlids exhibit divergence in or near genes enriched for  
214 BMP signalling, gastrulation, eye and telencephalon development, as well as the TALE  
215 (*Ir*x) gene family. To explore the developmental consequences of this differentiation, we  
216 investigated early forebrain specification in rock- and sand- embryos, building upon our  
217 previous studies and interest in *irx1b* and early brain development (Sylvester, Rich et al.  
218 2010, Sylvester, Rich et al. 2013). During development, the complexity of the vertebrate

219 brain is first laid out in the neural plate, a single-cell thick sheet of cells that forms between  
220 non-neural ectoderm and the germ ring at gastrulation. *Irx* genes act as transcriptional  
221 repressors of BMP signal in gastrulation, and function to specify the neural plate  
222 (Cavodeassi, Modolell et al. 2001). BMPs, in turn, are protective of the anterior-most  
223 region of the neural plate, which will ultimately give rise to the telencephalon, and  
224 suppress the eye field (Bielen and Houart 2012). Given alternatively fixed variants in the  
225 *irx1b* gene, expected interactions between *Irx* and BMP signaling in the early embryo and  
226 known telencephalon vs. eye size differences between rock- vs. sand- species (Sylvester,  
227 Rich et al. 2010, Sylvester, Rich et al. 2013), we examined and quantified the early activity  
228 of *irx1b* and BMP in rock- vs. sand- embryos.

229  
230 We used a custom device to orient and image cichlid embryos *in toto* at gastrula and  
231 neurula stages (White, Sylvester et al. 2015). In early gastrula (EG), *irx1b* (red) and BMP  
232 signal (green, PSMAD) delineate complementary dorsal and ventral domains of the  
233 embryo (Figure 2A). By mid-gastrula (MG), *irx1b* shows two expression domains, one in  
234 the posterior portion of the developing neural plate (np) and the second co-expressed  
235 with PSMAD activity around its anterior border (white arrowheads). By late gastrula (LG),  
236 the domains of *irx1b* expression and PSMAD activity sharpen around the leading edge of  
237 the neural plate but remain overlapping around the periphery. Notably, *irx1b* expression  
238 is expanded in the anterior domain of sand-dwellers (S) compared to rock-dwellers at EG  
239 and MG, and then defines the boundary of the neural plate earlier in sand-dwellers (S) in  
240 LG (arrowheads). As a consequence, BMP signal should have a longer-lasting influence  
241 on the neural plate in rock-dwelling species. Based upon manipulative experiments in  
242 zebrafish (Bielen and Houart 2012), this is predicted to result in a relatively larger  
243 presumptive telencephalon and smaller eye field.

244

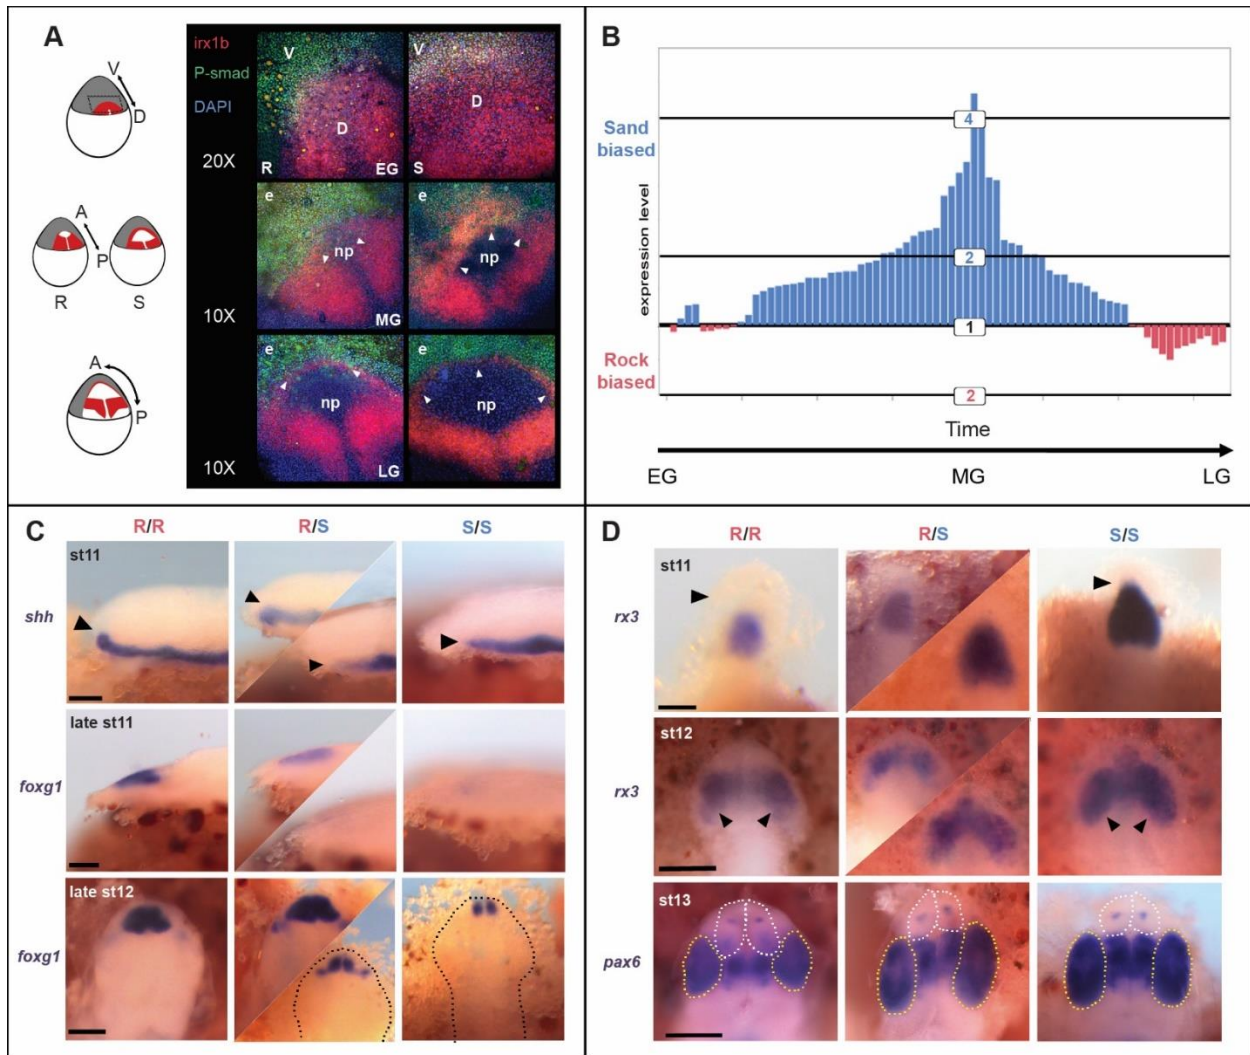

245

246

247 Figure 2: A gastrula-stage map of forebrain diversification | (A) Double in situ hybridization

248 – immunohistochemistry to visualize *irx1b* expression (red) and BMP [PSMAD] activity

249 (green) across the stages of cichlid gastrulation; DAPI in blue. Three rows represent early,

250 mid and late gastrulation (EG, MG, LG) in embryos of rock- (R) and sand-dwelling (S)

251 species. Sand-dwellers show expanded *irx1* expression in the dorsal portion of the

252 embryo at EG, expanded *irx1b* expression in the anterior domain at MG (arrowheads)

253 and clear PSMAD activity from the developing neural plate (np) earlier in LG

254 (arrowheads). e=epidermis. Schematics at left show *irx1b* expression domains in red, on

255 cartoons of cichlid embryos. (B) Relative expression of rock- (red) and sand- (blue) *irx1b*

256 alleles, sampled from 74 heterozygous rock X sand F<sub>2</sub> embryos, across the stages of

257 gastrulation. F<sub>2</sub> embryos were sampled at stage 9 (gastrulation). Because Malawi cichlid

258 species are maternal mouthbrooders and eggs are fertilized in batches per brood, each  
259 brood's embryos vary in timing of fertilization by up to 4h. Embryos within broods can  
260 therefore be sub-staged in gastrulation (see methods). Each bar on the plot represents  
261 the relative allelic expression of sand- and rock- *irx1b* in a heterozygous F<sub>2</sub> individual.  
262 Quantification of allele-specific expression (ASE) shows that levels are sand-biased, and  
263 that this effect is strongest in MG. (C) in situ hybridization of *shh* and *foxd1*, during neurula  
264 stages, showing development of the telencephalon in rock- X sand- F<sub>2</sub> embryos, indexed  
265 for *irx1b* genotype. F<sub>2</sub> individuals homozygous for rock- *irx1b* alleles (R/R) show a more  
266 dorsal progression of *shh* expression (black arrowheads), an earlier and a larger  
267 expression domain of the telencephalon marker *foxd1*. The top two rows are lateral views;  
268 bottom row is a dorsal view. Dotted lines demarcate the outline of the embryo in dorsal  
269 view. Heterozygous individuals exhibit greater variation in expression domains (middle  
270 columns), indicating that genetic factors other than variants in *irx1b* contribute to this  
271 phenotype. (D) in situ hybridization for *rx3* and *pax6*, during neurula stages, chart the  
272 development of the eye field in rock- X sand- F<sub>2</sub> embryos indexed for *irx1b* genotypes. F<sub>2</sub>  
273 individuals homozygous for sand- *irx1b* alleles (S/S) show larger domains of *rx3* (black  
274 arrowheads) and larger eyes (*pax6*, also marked by yellow dotted line), but smaller  
275 telencephala (white dotted line). All panels are dorsal views. Heterozygous individuals  
276 exhibit greater variation in expression domains (middle columns), indicating that genetic  
277 factors other than variants in *irx1b* contribute to this phenotype.  
278

279 We developed a panel of rock- x sand- hybrid crosses to formally evaluate the role of  
280 *irx1b* in forebrain diversification. First, we used quantitative RT-PCR to measure allele-  
281 specific expression (ASE) in heterozygous rock- x sand- F<sub>2</sub> hybrids, across the stages of  
282 gastrulation. We observed that the sand- *irx1b* allele was expressed at significantly higher  
283 levels (average of 2.5-fold;  $p = 4.5e-13$ ; Student's t-test) and that this difference was  
284 largely confined to MG (Figure 2B). Next, we used hybrid embryos to chart the  
285 development of the telencephalon and the eye field. Rock- x sand- F<sub>2</sub> hybrids, indexed  
286 for *irx1b* genotype, were raised to neurula and somitogenesis stages and we examined  
287 the expression of *shh* (which induces *foxd1* and the ventral forebrain), *foxd1* (a marker of  
288 the telencephalon), and *rx3* (a marker of the eye field), by in situ hybridization. F<sub>2</sub>  
289 individuals homozygous for rock- *irx1b* alleles exhibited a larger and more rostral domain  
290 of *shh* expression, an earlier and larger domain of *foxd1* and a smaller *rx3* domain (Figure  
291 2C, D). These differences between rock- vs. sand- *irx1b* genotypes match expression  
292 divergence observed amongst rock- vs. sand- species (Sylvester, Rich et al. 2010,  
293 Sylvester, Rich et al. 2013). Finally, when we compared the relative size of the  
294 telencephalon among *irx1b* genotypes, individuals homozygous for rock- alleles exhibited  
295 larger telencephala (SI Figure 3). We conclude that genetic variants in and around the  
296 *irx1b* gene contribute to divergent specification of the Malawi cichlid forebrain, likely via  
297 spatial, temporal and quantitative variation in the expression of *irx1b* itself.

298

299 Our genome sequencing revealed a near-fixed InDel in the 3' UTR of the Malawi cichlid  
300 *irx1b* gene (SI Figure 4). Rock- species possess an 85bp insertion, compared to cichlid  
301 species from outside of the Malawi lineage. Sand-dwellers largely lack the insertion and  
302 exhibit a 6bp deletion compared to outgroups. The insertion shows strong genetic  
303 similarity to a fragment from the Rex1 family of non-LTR retrotransposons (Volff, Korting  
304 et al. 2000). Given the likelihood that *Astatotilapia calliptera* populations surrounding Lake  
305 Malawi may have seeded the Malawi evolutionary radiation and contributed to rock- and  
306 sand-dwelling lineages (Loh, Bezault et al. 2013, Malinsky, Svardal et al. 2018), we  
307 explored the presence/absence of this InDel in *Astatotilapia* samples. We found that most  
308 *Astatotilapia* individuals and populations had the rock- *irx1b* allele (the insertion), but that  
309 an individual from Chizumulu Island was fixed for the sand- allele and two individuals

310 sampled from Itupi were heterozygous. Because the 85bp insertion in rock- species is a  
311 partial Rex1 fragment, and sand- species carry a 6bp deletion compared to outgroups,  
312 we speculate that the current rock- and sand- divergent alleles were generated by at least  
313 two imperfect excision events of an element that invaded the genome of the Malawi +  
314 *Astatotilapia* ancestor. Rex1/Babar retrotransposons have been active in African cichlid  
315 genomes, and are known to influence gene expression when inserted in 5' and 3' UTRs  
316 (Brawand, Wagner et al. 2014). Future experiments will determine whether this Rex1  
317 insertion causes the differences in *irx1b* gene expression and forebrain specification we  
318 observed.

319

### 320 *Genomics of divergent social challenge and opportunity*

321 Rock- and sand-dwelling Malawi cichlids live in strikingly different social and physical  
322 environments. Rock-dwelling males tend to be more aggressive than sand-dwellers  
323 (Baran and Streelman 2020) and defend territories year-round as sites for feeding and  
324 breeding. By contrast, sand-dwellers are more exploratory than rock-dwellers (Johnson,  
325 Moore et al. 2020) and only breeding males tend to be territorial, often building sand  
326 bowers to attract females and mitigate male-male aggression. Given these observations  
327 and genome-wide enrichment for categories related to adult behavior and social  
328 interaction, we designed an experimental paradigm to investigate brain gene expression  
329 profiles associated with divergent rock- vs. sand- social behaviors.

330

331 We evaluated social challenge and opportunity amongst males using a large tank with a  
332 'rock' habitat at one end and 'sand' at the other, separated by glass bottom (Figure 3A).  
333 When parental rock- species are placed in this tank paradigm, males court females on  
334 the rock side of the tank. Males of sand- species court females over sand and construct  
335 species-appropriate bowers. When single hybrid rock- x sand- F<sub>1</sub> males are placed in this  
336 arena with hybrid F<sub>1</sub> females, males invariably court females over the 'rock' habitat.  
337 However, when two rock- x sand- hybrid F<sub>1</sub> males (brothers) were allowed to compete for  
338 gravid hybrid F<sub>1</sub> females in this tank paradigm, we observed something different. One  
339 male, typically the larger, courted females over the rock habitat, and the other

340 simultaneously constructed bowers to court females over the sand. We found no  
341 difference in gonadal-somatic index (GSI), an established biological metric of  
342 reproductive status and maturity, between F<sub>1</sub> males behaving as ‘socially rock’ vs.  
343 ‘socially sand.’ (SI Figure 5). Our observation of divergent behavior between F<sub>1</sub> brothers  
344 in the same tank suggests an interaction between the genome and the social  
345 environment.

346  
347 We used RNA-seq to investigate gene expression profiles associated with behavior of  
348 rock- x sand- F<sub>1</sub> hybrid males that were actively courting females over rock vs. sand.  
349 Whole brains of F<sub>1</sub> males tested singly (n=2 lone) as well as F<sub>1</sub> brothers assayed in dyads  
350 (n=4 dyads) were collected during courtship, and interrogated by RNA-seq. Strikingly,  
351 gene expression profiles clustered not by fraternal relatedness, but rather by behavioral  
352 context (Figure 3B). Males from dyads that courted females over rocks had expression  
353 profiles similar to single males (who also courted over rocks) but distinct from their  
354 brothers that built bowers and courted females over sand in the same tank. Genes were  
355 considered significantly differentially expressed between ‘social rock’ and ‘social sand’  
356 brains if they exhibited both a fold change  $\geq 2$  and crossed the threshold of  $p_{\text{adj}} < 0.05$ .  
357 Based on this criterion, we found 832 genes differentially expressed between rock- vs.  
358 sand-behaving males (Figure 3B, SI Table 4). Among differentially expressed genes, we  
359 observed significant functional enrichment for GO Biological Process categories ‘synaptic  
360 signaling’ ( $p < 2.3e-21$ ), ‘synaptic plasticity’ ( $p < 3.6e-09$ ), ‘visual behavior’ ( $p < 2.09e-06$ );  
361 mouse phenotypes ‘abnormal learning/memory/conditioning’ ( $p < 5.9e-07$ ), ‘abnormal  
362 telencephalon morphology’ ( $p < 3.95e-07$ ), ‘abnormal spatial learning’ ( $p < 9.9e-07$ ) and  
363 pathways ‘axon guidance’ ( $p < 3.3e-05$ ), ‘oxytocin signaling’ ( $p < 5.2e-05$ ) and ‘estrogen  
364 signaling’ ( $p < 1.8e-04$ ) (SI Table 4). Matches against the Allen Brain Atlas database of  
365 gene expression yielded enrichment for exclusively sub-regions of the telencephalon:  
366 CA3, hippocampus ( $p_{\text{adj}} = 4.6e-6$ ), CA2, hippocampus ( $p_{\text{adj}} = 7.3e-5$ ), CA4, hippocampus  
367 ( $p_{\text{adj}} = 0.001$ ), claustrum ( $p_{\text{adj}} = 0.001$ ), subiculum ( $p_{\text{adj}} = 0.003$ ), dentate gyrus ( $p_{\text{adj}} = 0.03$ )  
368 and the basomedial nucleus of the amygdala ( $p_{\text{adj}} = 0.03$ ). The hippocampus encodes  
369 episodic memory and spatial representations of the environment (Olton, Becker et al.  
370 1979), and more recently its subregions have been shown to play critical roles in anxiety,



371 social interaction, and social memory formation (Hitti and Siegelbaum 2014, Zou, Chen  
372 et al. 2016, Chiang, Huang et al. 2018). Roughly 38% of differentially expressed genes  
373 also contained genetically differentiated SNP/InDels between rock- and sand- species (p-  
374 value < 2e-6, Fisher's exact test), implying considerable cis-acting genetic variation.  
375 Enrichment of categories related to brain function and synaptic plasticity showed greater  
376 overlap than expected (Figure 3C). These context-dependent differences suggest rapid  
377 and concerted changes in brain gene expression as males experienced and responded  
378 to different social challenges and opportunities (O'Connell and Hofmann 2012, York, Patil  
379 et al. 2018).  
380

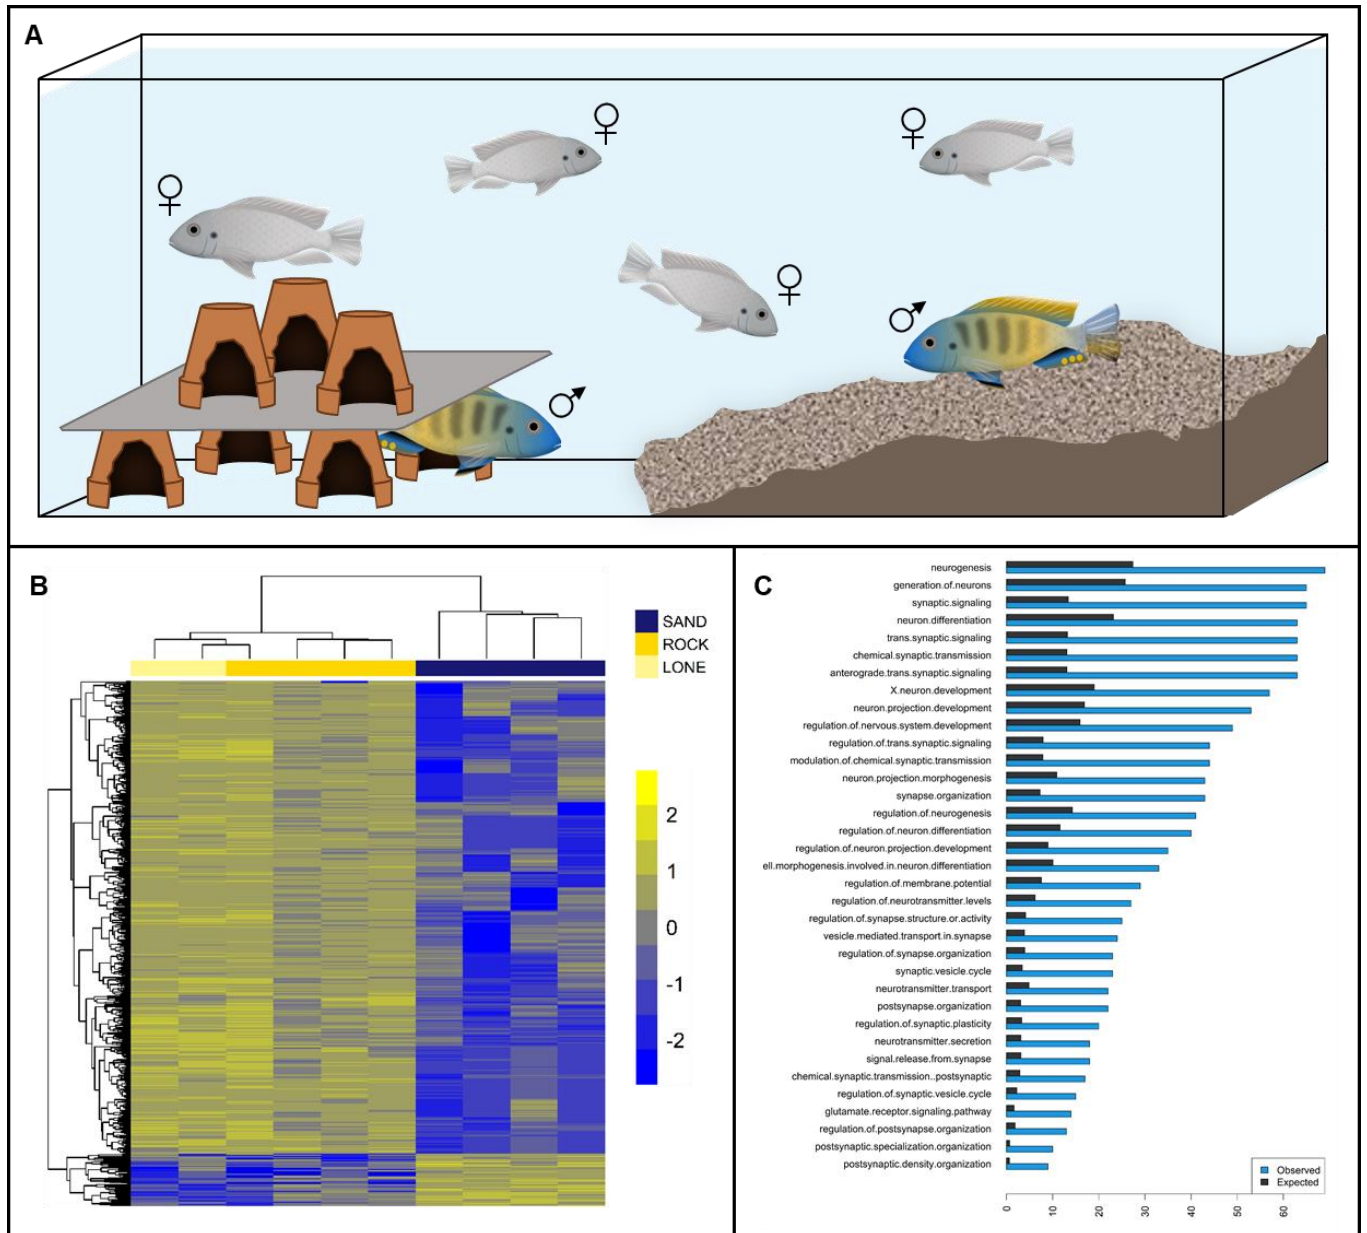

381

382 Figure 3: Genomics of divergent social context | (A) Schematic of the social context  
383 behavioral paradigm, in which rock-, sand- and rock- X sand- F<sub>1</sub> hybrids were evaluated.  
384 (B) Heatmap of genes differentially expressed in the brains of F<sub>1</sub> males behaving in either  
385 rock or sand social contexts. Each row in the heatmap is a gene, each column is an  
386 individual. Two F<sub>1</sub> males were not paired with other males, and courted females over the  
387 rock habitat (lone). All other F<sub>1</sub> males (n=8) were introduced to the testing arena in dyads.  
388 Notably, male brain gene expression clusters by social context and not fraternal  
389 relationships. (C) Gene Ontology (GO) Biological Process terms that show greater than

390 expected overlap between (i) genes differentially expressed in the brains of social rock-  
391 vs. social sand- males and (ii) genes that are differentiated in the genomes of rock- vs  
392 sand- species groups.

393

394 **Discussion**

395 *Genome-enabled inference of evolutionary change in morphology and behaviour*

396 A fundamental problem in evolutionary biology is understanding the cellular,  
397 developmental and genetic basis of how traits change. This is a challenge because we  
398 lack sufficient information about how genes work in outbred genomes from nature and we  
399 do not fully comprehend the causal role of noncoding variation in specifying form and  
400 function. This problem is especially difficult for traits that are only observed in particular  
401 contexts, like development and behaviour. To make progress, we and others have  
402 focused on study systems exhibiting abundant phenotypic diversity built from a relatively  
403 small number of genetic changes. Here we identify and characterize the genetic variants  
404 that demarcate one of the deepest evolutionary splits amongst Lake Malawi cichlid  
405 groups, that between rock- and sand-dwelling species thought to have diverged in the  
406 last one million years. We found a small percentage (less than 0.1%) of genetic variants  
407 to be differentiated between rock- and sand- groups, and that the majority of differentiated  
408 variants (>96%) were noncoding. Differentiated non-coding variants were more likely to  
409 be in an evolutionarily conserved locus as a function of genetic differentiation, suggesting  
410 that divergent rock- vs. sand- noncoding changes are functional. To support this idea, we  
411 identified alternately fixed rock- vs. sand- noncoding variants within experimentally  
412 verified, vertebrate-conserved craniofacial and cranial neural crest cell enhancers. The  
413 latter observation is similar in type to the discovery of human-specific deletions within  
414 mammal-conserved regulatory sequence (McLean, Reno et al. 2011).

415  
416 Recently we surveyed genome-wide divergence between sand-dweller sub-groups that  
417 construct pit vs. castle bowers, sand-made structures to attract females for mating (York,  
418 Patil et al. 2018). Mapping those variants to the same genome reference, we expected  
419 distinct patterns of diversification because rock-sand and pit-castle divergence likely  
420 occurred at different times, along different trait axes, under the control of different  
421 evolutionary forces (Streelman and Danley 2003). Consistent with expectation, there is  
422 clear clustering of genome divergence on chromosome 11 for the pit-castle comparison  
423 (SI Figure 6), while all chromosomes carry the signature of rock-sand diversification

424 (Figure 1B). However, contrary to our expectation, rock- vs. sand- and pit- vs. castle-  
425 radiations have diverged in similar gene sets. Out of 3070 genes identified near 10kb high  
426  $F_{ST}$  regions in the rock- vs. sand- comparison, 483 overlap with 1090 genes identified  
427 near high  $F_{ST}$  regions in the pit- vs. castle- comparison (p-value < 2e-9, Fisher's exact  
428 test, SI Table 3). This result may imply that evolutionary diversification in Lake Malawi is  
429 limited, or constrained, by chromosomal location.

430

431 Overall, genes in proximity to rock-sand divergent variants were enriched for functional  
432 categories related to early forebrain and craniofacial development, neuronal function and  
433 social behavior. This list of variants, coupled with consistent patterns of functional and  
434 pathway enrichment, motivated follow up experiments focused on early brain  
435 development and adult social behavior (Figure 4). It is apparent from our work here and  
436 previously (Sylvester, Rich et al. 2010, Sylvester, Rich et al. 2013), that Malawi cichlid  
437 brains and nervous systems begin to differ during gastrulation in pathways that can be  
438 predicted from divergent genome sequences. This is interesting for at least two reasons.  
439 First, this observation runs counter to the 'late equals large' textbook example (Finlay and  
440 Darlington 1995) of how brains evolve differences in relative proportions of their parts  
441 (Sylvester, Rich et al. 2010). Similarly, such early variation in development is not thought  
442 to be a driving force in evolution, precisely because early changes can have global and  
443 ramifying effects. Collectively, our findings provide a partial description of the conditions  
444 wherein variation during the earliest stages of development can contribute to evolutionary  
445 diversification. In each case we have examined, variation in gene expression is  
446 quantitative, heterochronic and limited to a precise stage or time period.

447

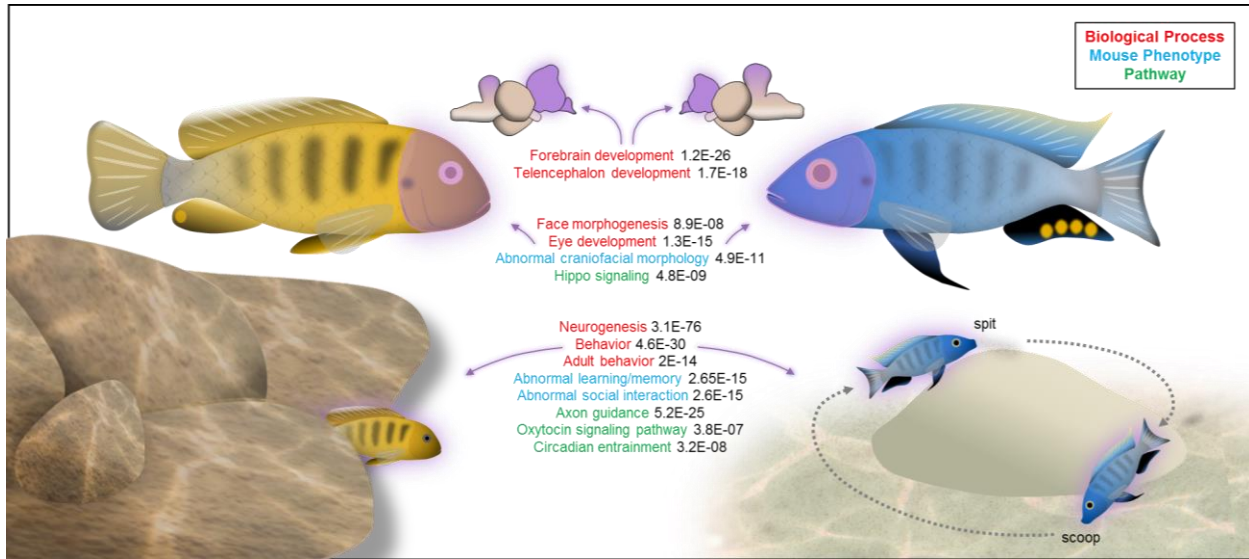

448

449

450 Figure 4: Genome-enabled discovery of evolutionary change in morphology and behavior.

451 | Summary cartoon synthesizing significant enrichment categories that differentiate the

452 genomes of rock- vs. sand-dwelling Malawi cichlids. Strong and consistent enrichment of

453 craniofacial, neural and behavioral categories motivated follow on experiments in early

454 brain development (Figure 2) and adult social behavior (Figure 3).

455

456 Sydney Brenner recognized the relationship between the genetic specification of nervous  
457 systems and the behavioral output of the brain (Brenner 1974). However, because these  
458 events take place so far apart in the lifespan of a vertebrate, they are rarely studied  
459 simultaneously. Here, the genome connects the two phenomena: rock- vs. sand-  
460 divergent gene sets indicating that both brain development and social behavior have been  
461 under divergent selection during the evolutionary diversification of these groups. To  
462 evaluate social behavior in rock- vs. sand-dwelling Malawi cichlids, we constructed a  
463 social context arena. The presence of sand and simulated rocky caves was sufficient to  
464 elicit species-appropriate male behavior when rock- or sand- males were tested with rock-  
465 or sand- gravid females. When rock- x sand- F<sub>1</sub> hybrid males were tested, one per tank,  
466 with F<sub>1</sub> hybrid females, males courted females in the rock quadrant of the tank. Notably,  
467 when dyads of F<sub>1</sub> brothers were tested in this tank paradigm with gravid F<sub>1</sub> females, we  
468 observed simultaneous 'social rock' and 'social sand' behavior. Brain gene expression  
469 profiles from behaving males clustered by social context (social rock vs social sand), and  
470 not by fraternal relationships. Differentially expressed genes were enriched for brain  
471 regions and pathways implicated in social interaction and overlapped significantly with  
472 rock- vs. sand- divergent genetic variants.

473  
474 Social context is known to influence the brain. For instance, our clustering results are  
475 similar to those of Whitfield and colleagues (Whitfield et al. 2003) who showed that brain  
476 gene expression in honey bees was predictive of behavior. Likewise, changes in brain  
477 morphology and gene expression predictably accompany the ascent to dominance in the  
478 cichlid fish *Astatotilapia burtoni* (Fernald and Maruska 2012). Our data seem not to fit the  
479 model of dominant-subordinate however. In our experiments, the gonado-somatic index  
480 (GSI) did not differ between social rock vs. social sand brothers within dyads. Both males  
481 exhibited nuptial coloration, courted females and in cases with multiple gravid females,  
482 both brothers reproduced. Body size was associated with divergent social rock vs. social  
483 sand behavior of F<sub>1</sub> males; the social rock brother was always larger (mean mass was  
484 26.96g ± 3.4 [SE] compared to 19.45g ± 2.2).

485

486 Our experiments demonstrate that F<sub>1</sub> hybrid male brains can express both social rock-  
487 and social sand- behavioral programs, and that social context determines which program  
488 is executed. This observation is similar to, but also different than, pit-digging x castle-  
489 building F<sub>1</sub> male Malawi cichlids who carry out parental bower behaviors in a specific  
490 sequence (York, Patil et al. 2018). Notably, in both cases, the hybrid males exhibit one  
491 of the two different parental behaviors at any one time – there is no intermediate behavior.  
492 In the pit- vs. castle- case, we think that the bower structure itself and/or a threshold signal  
493 from females might lock the hybrid male brain into a behavioral state. In the rock- vs sand-  
494 case here, it appears that other social cues (i.e., the presence and size of a rival male)  
495 lock the hybrid male brain into a behavioral state. These context-dependent behaviors,  
496 accompanied by changes in brain gene expression, are compelling examples of  
497 interaction between the genome and the social environment. The cellular and genetic  
498 basis of these behaviors and their plasticity deserves further attention. Our comparative  
499 genomic and brain gene expression data, combined with enrichment testing and  
500 experimental approaches, highlight that the Malawi cichlid telencephalon will be central  
501 to this future work.  
502



503 **Acknowledgements:** This work was supported by grants from the NIH (R01GM101095,  
504 2R01DE019637-10 to JTS and F32GM128346-01A1 to ZVJ) and the Human Frontiers  
505 Science Program (RGP0052/2019 to JTS). We would like to thank Shweta Biliya and the  
506 Genomics Core at Georgia Tech for invaluable assistance with the NGS sequencing. We  
507 also thank the members of the Streelman lab for comments on this manuscript.

508

509 **Competing interests:** The authors declare no competing interests.

## 510 **Methods**

### 511 *Genome sequencing*

512 We extracted genomic DNA, from fin clips (Qiagen DNeasy, Cat #69504), from 8 rock  
513 dwelling and 14 sand dwelling Lake Malawi species (SI Table 2). We made libraries using  
514 the Illumina Nextera Library prep kit and performed paired-end sequencing on the Illumina  
515 Hi-Seq 2500 at Georgia Tech. The *Metriaclima zebra* reference genome version  
516 MZ\_UMD2a (Conte, Joshi et al. 2019) was used for genome alignment, variant discovery  
517 and annotation using standard BWA (Li and Durbin 2009) and GATK practices (Van der  
518 Auwera, Carneiro et al. 2013). The maximum likelihood tree in Figure 1A was constructed  
519 using SNPhylo (Lee, Guo et al. 2014), from variant data.

520

### 521 *Genetically Divergent Regions*

522 Vcftools (Danecek, Auton et al. 2011) was used to calculate  $F_{ST}$  (--weir-fst-pop) between  
523 the 8 rock and 14 sand species. Variants with  $F_{ST} = 1$  were noted to be alternately fixed  
524 between rock and sand lineages in our dataset.  $F_{ST}$  was also measured across 10kb  
525 windows (--fst-window-size). Significance thresholds were marked using the fdrtool  
526 package in R. All variants were annotated using Snpeff 4.3i (Cingolani, Platts et al. 2012).  
527 We tested the genes within 25 kb of significantly differentiated variants for enrichment of  
528 functional categories. The cichlid gene names were converted to human analogs using  
529 Treefam based mapping (Ramakrishnan Varadarajan, Mopuri et al. 2018) and functional  
530 enrichment was determined using the TOPPFUN web-browser interface (Chen, Bardes  
531 et al. 2009).

532

### 533 *PhastCons analysis*

534 Pairwise alignments were generated using lastz v1.02(Harris 2007), with the following  
535 parameters: "B=2 C=0 E=150 H=0 K=4500 L=3000 M=254 O=600 Q=human\_chimp.v2.q  
536 T=2 Y=15000". This was followed by using USCS genome utilities  
537 (<https://genome.ucsc.edu/util.html>,

538 [https://hgdownload.soe.ucsc.edu/admin/exe/linux.x86\\_64/FOOTER](https://hgdownload.soe.ucsc.edu/admin/exe/linux.x86_64/FOOTER)) axtChain tool with -  
539 minScore=5000. Additional tools with default parameters were then used following the  
540 UCSC whole-genome alignment paradigm  
541 ([http://genomewiki.ucsc.edu/index.php/Whole\\_genome\\_alignment\\_howto](http://genomewiki.ucsc.edu/index.php/Whole_genome_alignment_howto)) in order to  
542 obtain a contiguous pairwise alignment. Multiple alignments were generated from  
543 pairwise alignments with the multiz v11.2 (Blanchette, Kent et al. 2004) program, using  
544 default parameters and the following pre-determined phylogenetic tree: ((((*M. zebra*, *P.*  
545 *nyerere*), *A. burtoni*), *N. brichardi*), *O. niloticus*) in agreement with Brawand et al.  
546 (Brawand, Wagner et al. 2014). Sequence conservation scores were then obtained using  
547 PhastCons (Siepel, Bejerano et al. 2005) with a phylogenetic model estimated by the  
548 phyloFit (Siepel and Haussler 2004) program, both from the PHAST software package  
549 (v.1.3). The model fitting was done using default parameters. PhastCons was run in two  
550 iterations, first to obtain the free parameters of the model (--estimate-trees and --no-post-  
551 probs) and then using the output from this we ran PhastCons again to attain the  
552 conservation scores with --target-coverage 0.3 --expected-length 100.

553

#### 554 *Vertebrate-conserved enhancer elements*

555 A comparative genomic approach was used to identify putative craniofacial and neural  
556 crest CNEs in mammals that segregate SNPs between rock-sand cichlid species.  
557 Experimentally verified and published genome-wide craniofacial and neural crest  
558 enhancers active during early embryonic stages that play a role in shaping the  
559 development of neural crest and craniofacial structures in mammals were identified from  
560 published literature (Rada-Iglesias, Bajpai et al. 2012, Attanasio, Nord et al. 2013). We  
561 used the liftOver tool (Kent, Sugnet et al. 2002), which maps orthologous genomic regions  
562 between species to convert genomic coordinates from one species to another. Using a  
563 Human to *Oreochromis niloticus* to *Metriaclima zebra* mapping and a Mouse to  
564 *Oreochromis niloticus* to *Metriaclima zebra* mapping, we identified the orthologous  
565 genomic locations of the published craniofacial and neural crest enhancers in cichlids.  
566 We designated any alternately fixed variant (variant with  $F_{ST} = 1$ ) that was also within an  
567 orthologous CNE as putatively involved in the rock-sand divergence (SI Table 2).

568

569 *Brain region enrichment analysis*

570 We identified 10,391 cichlid genes with human homologues and generated an expression  
571 matrix for each gene across 250 human brain structures spanning telencephalon,  
572 diencephalon, mesencephalon, and metencephalon using adult human brain microarray  
573 data collected by the Allen Brain Institute (Hawrylycz, Lein et al. 2012). Cortical regions  
574 and gyri for which fish do not have putative homologues were excluded from the analysis  
575 (100/350, leaving 250 regions for subsequent analysis). The expression matrix was  
576 generated using the `get_expression` function in the `ABAEnrichment` Bioconductor  
577 package in R (Grote, Prufer et al. 2016). We then calculated the specificity of expression  
578 for each gene in each of these brain regions using the `specificity.index` function in the `pSI`  
579 package for R. This function calculates a matrix of gene expression specificity indices,  
580 and corresponding p-values, as described previously (Dougherty, Schmidt et al. 2010,  
581 Xu, Wells et al. 2014). We then tested whether 1) genes within 25kb of rock vs. sand  
582 significantly differentiated variants (described above under “Genetically Divergent  
583 Regions”), and 2) genes that were differentially expressed between rock- vs. sand-  
584 behaving F1 hybrid males, were enriched for transcriptional markers of specific brain  
585 regions using the `fisher.iteration` function with Benjamini-Hochberg correction, again  
586 using the `pSI` package for R. For enrichment testing of differentially expressed genes, we  
587 restricted analysis to genes that met the following criteria: 1) transcripts for the gene were  
588 detected in all eight paired behaving males, and 2) at least 6 transcripts were detected in  
589 each subject.

590

591 *Staging during gastrulation*

592 Cichlid gastrulation was split into three sub stages within the gastrula stage 9 (Murata,  
593 Tamura et al. 2010). Gastrulation lasts 8 to 12 hours, depending on the species, and is  
594 defined as after the shield (as described in zebrafish) stage until the presence of the first  
595 somite at the beginning of neurula (stage 10). Embryos were classified as early gastrula  
596 (EG) by an asymmetry in epiboly after shield stage until the formation of a ridge that is

597 analogous to the anterior neural ridge (ANR) in chick and mouse and the anterior neural  
598 border (ANB) in zebrafish. At that point embryos were classified as mid gastrula (MG).  
599 MG lasts until the formation of the dorsal-ventral axis, defined by further lengthening of  
600 one side of the embryo, which begins to thicken as epiboly progresses. This is the dorsal  
601 side of the embryo, and the side opposite the ANR is classified the ventral side of the  
602 embryo. At this point the embryos are defined as late gastrula (LG). LG ends with the  
603 specification of the neural plate, which appears as a portion of the dorsal embryo that is  
604 raised relative to ventral side, usually in line with the ANR.

605

#### 606 *Immunohistochemical staining*

607 Embryos were harvested at 24 hours post fertilization (hpf) from each of the rock -dwelling  
608 cichlids *Metriaclima patricki* and *Metriaclima zebra* and the sand-dwelling cichlid  
609 *Copadichromis borleyi* and *Tramitichromis intermedius*. The embryos were cultured until  
610 they reached gastrula stage, approximately 36 to 40 hpf, then fixed at intervals throughout  
611 gastrula until neurula. The embryos were then treated with auto-fluorescence reducer  
612 (1.55mL 5M NaCl, 250ul Tris-HCl, pH 7.5, and 95mg NaBH<sub>4</sub>) overnight, and 10% 2-  
613 mercaptoethanol for 1 hour. Next, whole mount *in situ* hybridization was done, using a  
614 modification methods we published previously (Fraser, Bloomquist et al. 2008). *irx1b* was  
615 visualized using Fast Red (naphthol chromogen, Roche Diagnostics), which fluoresces  
616 at near red wavelengths (500-650 nm). After *in situ* hybridization, embryos were  
617 immunostained for pSMAD 1,5,8 protein, using published protocols (Tucker, Mintzer et  
618 al. 2008). Embryos were then bathed in Vectashield (Vector Labs) containing DAPI and  
619 placed in a specially built mold(White, Sylvester et al. 2015) that accommodates the large  
620 yolk and holds the embryo upright. Embryos were then scanned using a Zeiss LSM 700-  
621 405 confocal microscope and processed using LSM 700 software and Image J.

622

#### 623 *Rock-Sand hybridization and genotyping*

624 Two rock-sand crosses, one between *Copadichromis borleyi* (CB, sand-dweller sire) and  
625 *Metriaclima zebra* (MZ, rock-dweller dam) and another between *Mchenga conophoros*

626 (MC, sand- sire) and *Petrotilapia* sp. 'thick bar' (PT, rock- dam), were artificially generated  
627 by taking the eggs from the dam just prior to spawning and mixing with sperm from the  
628 sire. The resultant F<sub>1</sub> were grown in tanks and allowed to spawn normally to generate F<sub>2</sub>.  
629 Several F<sub>2</sub> broods were taken from multiple F<sub>1</sub> females for each cross, a total of 355  
630 individuals for the CB x MZ cross and 608 for the MC x PT cross. The embryos were fixed  
631 at every stage starting at gastrula (stage 9) until early pharyngula (stage 14). The F<sub>2</sub>  
632 embryos were RNA-extracted at stage 9. DNA extraction was performed by fixing the  
633 embryos (stage 11-14) in 70% ethanol, then removing the tail from each individual and  
634 extracting the DNA using an extraction kit (Qiagen). Following extraction, the F<sub>2</sub> embryos  
635 were genotyped using custom probes (CAAATCTCCC[C/T]CCGCGGC, Taqman custom  
636 probes, Invitrogen) designed to identify a SNP in *irx1b* using RT-PCR. A subset of the  
637 embryos was also sequenced at a 900 bp interval around the *irx1b* SNP to verify the  
638 custom probes.

#### 639 640 *Quantitative F<sub>2</sub> Analysis*

641 We quantified *irx1b* in F<sub>2</sub> at stage 9 and separated by genotypic class. The 74  
642 heterozygous rock X sand F<sub>2</sub> embryos were dissected to remove most of the yolk and the  
643 total RNA was extracted from each individual using an RNA Extraction Kit (Qiagen).  
644 The amount of mRNA specific to each allele of *irx1b* was quantified by using the RNA-to-  
645 Ct kit (Invitrogen) and the custom probes. The delta Ct for each heterozygote was  
646 generated with the equation, 2<sup>(allele from dam – allele from sire)</sup>. We tested the data  
647 with an ANOVA, followed by a Tukey's multiple comparison test to determine significance  
648 between genotype classes.

#### 649 650 *Forebrain and eye measurements*

651 The forebrain and eyes were measured by integrating the area of transverse sections in  
652 embryos of rock- and sand-dweller cichlid species, using previously published methods  
653 (Sylvester, Rich et al. 2013). The rock-dweller species included *Cynotilapia afra* (CA,  
654 planktivore), *Labeotropheus fuelleborni* (LF, algivore) and *Metriaclima zebra* (MZ,

655 generalist); sand-dweller species included *Aulonocara jacobfreibergi* (AJ, 'sonar' hunter),  
656 *Copadichromis borleyi* (CB, planktivore) and *Mchenga conophoros* (MC,  
657 insectivore/generalist). Embryos from each species, as well as the F<sub>2</sub> individuals, were  
658 measured starting from the earliest the telencephalon can be differentiated from the  
659 forebrain (mid-somitogenesis, stage 12) and at each subsequent stage until the forebrain  
660 has defined prosomeres (early pharyngula, stage 14) (Sylvester, Rich et al. 2010). To  
661 keep measurements standardized across stages, all measurements were defined by  
662 forebrain morphology at the earliest timepoint (stage 12). The 'eye' measurement remains  
663 consistent at all stages, the 'anterior' measurement includes the telencephalon and  
664 presumptive olfactory bulb, and the 'posterior' measurement includes the diencephalon  
665 and each of its constitutive prosomeres (dorsal and ventral thalamus and hypothalamus).  
666 To facilitate measurements, we used gene expression of *rx3* (for stage 12 embryos) and  
667 *pax6* (stage 13 and 14) to identify the different structures of the forebrain and eye.  
668

#### 669 *RNA Extraction and Sequencing, Adult Social Behavior*

670 Adult F<sub>1</sub> hybrid males (Supplementary table 4) were introduced to an assay tank  
671 containing females of the same cross and simulated rock habitat on one side and  
672 simulated sand habitat on the other side separated by empty tank space (Figure 3A).  
673 Male brains were harvested within 20 minutes of exhibiting territoriality and displays for  
674 females by rapid decapitation and whole brains were immediately stored in RNAlater  
675 (Thermo Fisher Cat# AM7020).

676  
677 Tissues were frozen in liquid nitrogen, homogenized using a mortar and pestle and placed  
678 in trizol. Following standard chloroform extraction, RNeasy mini columns (Qiagen Cat  
679 No./ID: 74104) were utilized to purify RNA for sequencing. Total RNA was quantified  
680 using Qubit (Molecular Probes) and quality analyzed using the Agilent 2100 Bioanalyzer  
681 System for RNA library preparation. RNA input was normalized to 1µg and libraries were  
682 prepared using the TruSeq Stranded mRNA Sample Prep Kit (Illumina- Kit A). Libraries  
683 were again quantified, quality assessed, and normalized for sequencing on the HiSeq  
684 2500 Illumina Sequencing System (Georgia Tech Genomics Core, standard practices).

685 Experimental design and raw files can be accessed on the NCBI Gene Expression  
686 Omnibus database under the accession number GSE122500.

687

### 688 *Differential Gene Expression Analysis*

689 Raw sequence reads from whole brain transcriptomes were quality controlled using the  
690 NGS QC Toolkit (Patel and Jain 2012). Raw reads with an average PHRED quality score  
691 below 20 were filtered out. Filtered reads were also trimmed of low-quality bases at the  
692 3' end. High quality sequence reads were aligned to the *M.zebra* reference genome  
693 MZ\_UMD2a(Conte, Joshi et al. 2019) using TopHat v2.0.9 (Trapnell, Pachter et al. 2009).  
694 On average, across all samples, over 95% of reads mapped to the reference genome.  
695 The resulting TopHat2 output bam files were sorted and converted to sam files using  
696 samtools v0.19 (Li, Handsaker et al. 2009). Sorted sam files were used as input for the  
697 HTSeq-count v0.6.1 program to obtain fragment counts for each locus (Anders, Pyl et al.  
698 2015). Fragment counts were scale-normalized across all samples using the  
699 calcNormFactors function in the edgeR package v3.6.8 (Robinson, McCarthy et al. 2010).  
700 Relative consistency among replicates and samples was determined via  
701 the Multidimensional scaling (MDS) feature within the edgeR package in R. The native R  
702 function *hclust(dist)* used to cluster samples. Scale-normalized fragment counts were  
703 converted into log<sub>2</sub> counts per million reads mapped (cpm) with precision weights using  
704 voom and fit to a linear model using limma v3.20.9 (Ritchie, Phipson et al. 2015). Pairwise  
705 contrasts were constructed between socially rock and socially sand samples. After  
706 correcting for multiple comparisons using the Benjamini-Hochberg method (Hochberg  
707 and Benjamini 1990), genes were considered differentially expressed between socially  
708 rock and socially sand samples if they exhibited both a fold change  $\geq 2$  and  $P_{adj} < 0.05$ .  
709 Using Treefam based mapping (Ramakrishnan Varadarajan, Mopuri et al. 2018) the  
710 cichlid gene names were converted to human analogs and functional enrichment was  
711 determined using the TOPPFUN web-browser (Chen, Bardes et al. 2009).



712

## References

713

- 714 Abrahams, B. S., D. E. Arking, D. B. Campbell, H. C. Mefford, E. M. Morrow, L. A. Weiss, I.  
715 Menashe, T. Wadkins, S. Banerjee-Basu and A. Packer (2013). "SFARI Gene 2.0: a community-  
716 driven knowledgebase for the autism spectrum disorders (ASDs)." Mol Autism **4**(1): 36.
- 717 Adhikari, A., T. N. Lerner, J. Finkelstein, S. Pak, J. H. Jennings, T. J. Davidson, E. Ferenczi, L.  
718 A. Gunaydin, J. J. Mirzabekov, L. Ye, S.-Y. Kim, A. Lei and K. Deisseroth (2015). "Basomedial  
719 amygdala mediates top-down control of anxiety and fear." Nature **527**(7577): 179-185.
- 720 Albertson, R. C., J. T. Strelman, T. D. Kocher and P. C. Yelick (2005). "Integration and evolution  
721 of the cichlid mandible: The molecular basis of alternate feeding strategies." Proceedings of the  
722 National Academy of Sciences of the United States of America **102**(45): 16287-16292.
- 723 Anders, S., P. T. Pyl and W. Huber (2015). "HTSeq--a Python framework to work with high-  
724 throughput sequencing data." Bioinformatics **31**(2): 166-169.
- 725 Attanasio, C., A. S. Nord, Y. W. Zhu, M. J. Blow, Z. R. Li, D. K. Liberton, H. Morrison, I. Plajzer-  
726 Frick, A. Holt, R. Hosseini, S. Phouanavong, J. A. Akiyama, M. Shoukry, V. Afzal, E. M. Rubin,  
727 D. R. FitzPatrick, B. Ren, B. Hallgrímsson, L. A. Pennacchio and A. Visel (2013). "Fine Tuning  
728 of Craniofacial Morphology by Distant-Acting Enhancers." Science **342**(6157).
- 729 Baran, N. M. and J. T. Strelman (2020). "Ecotype differences in aggression, neural activity and  
730 behaviorally relevant gene expression in cichlid fish." Genes Brain Behav **19**(6): e12657.
- 731 Ben-Ari Fuchs, S., I. Lieder, G. Stelzer, Y. Mazor, E. Buzhor, S. Kaplan, Y. Bogoch, I. Plaschkes,  
732 A. Shitrit, N. Rappaport, A. Kohn, R. Edgar, L. Shenhav, M. Safran, D. Lancet, Y. Guan-Golan,  
733 D. Warshawsky and R. Shtrichman (2016). "GeneAnalytics: An Integrative Gene Set Analysis  
734 Tool for Next Generation Sequencing, RNAseq and Microarray Data." Omics-a Journal of  
735 Integrative Biology **20**(3): 139-151.
- 736 Bendesky, A., Y.-M. Kwon, J.-M. Lassance, C. L. Lewarch, S. Yao, B. K. Peterson, M. X. He, C.  
737 Dulac and H. E. Hoekstra (2017). "The genetic basis of parental care evolution in monogamous  
738 mice." Nature **544**(7651): 434.
- 739 Bielen, H. and C. Houart (2012). "BMP signaling protects telencephalic fate by repressing eye  
740 identity and its Cxcr4-dependent morphogenesis." Developmental cell **23**(4): 812-822.
- 741 Blanchette, M., W. J. Kent, C. Riemer, L. Elnitski, A. F. Smit, K. M. Roskin, R. Baertsch, K.  
742 Rosenbloom, H. Clawson and E. D. Green (2004). "Aligning multiple genomic sequences with the  
743 threaded blockset aligner." Genome research **14**(4): 708-715.

- 744 Bloomquist, R. F., T. E. Fowler, J. B. Sylvester, R. J. Miro and J. T. Strelman (2017). "A  
745 compendium of developmental gene expression in Lake Malawi cichlid fishes." BMC Dev Biol  
746 **17**(1): 3.
- 747 Bonkowsky, J. L., X. Wang, E. Fujimoto, J. E. Lee, C. B. Chien and R. I. Dorsky (2008). "Domain-  
748 specific regulation of foxP2 CNS expression by lef1." BMC Dev Biol **8**: 103.
- 749 Boyle, E. A., Y. I. Li and J. K. Pritchard (2017). "An Expanded View of Complex Traits: From  
750 Polygenic to Omnigenic." Cell **169**(7): 1177-1186.
- 751 Brawand, D., C. E. Wagner, Y. I. Li, M. Malinsky, I. Keller, S. Fan, O. Simakov, A. Y. Ng, Z. W.  
752 Lim, E. Bezault, J. Turner-Maier, J. Johnson, R. Alcazar, H. J. Noh, P. Russell, B. Aken, J. Alfoldi,  
753 C. Amemiya, N. Azzouzi, J. F. Baroiller, F. Barloy-Hubler, A. Berlin, R. Bloomquist, K. L.  
754 Carleton, M. A. Conte, H. D'Cotta, O. Eshel, L. Gaffney, F. Galibert, H. F. Gante, S. Gnerre, L.  
755 Greuter, R. Guyon, N. S. Haddad, W. Haerty, R. M. Harris, H. A. Hofmann, T. Hourlier, G. Hulata,  
756 D. B. Jaffe, M. Lara, A. P. Lee, I. MacCallum, S. Mwaiko, M. Nikaido, H. Nishihara, C. Ozouf-  
757 Costaz, D. J. Penman, D. Przybylski, M. Rakotomanga, S. C. Renn, F. J. Ribeiro, M. Ron, W.  
758 Salzburger, L. Sanchez-Pulido, M. E. Santos, S. Searle, T. Sharpe, R. Swofford, F. J. Tan, L.  
759 Williams, S. Young, S. Yin, N. Okada, T. D. Kocher, E. A. Miska, E. S. Lander, B. Venkatesh, R.  
760 D. Fernald, A. Meyer, C. P. Ponting, J. T. Strelman, K. Lindblad-Toh, O. Seehausen and F. Di  
761 Palma (2014). "The genomic substrate for adaptive radiation in African cichlid fish." Nature  
762 **513**(7518): 375-381.
- 763 Brenner, S. (1974). "Genetics of *Caenorhabditis-Elegans*." Genetics **77**(1): 71-94.
- 764 Carvalho, F. R., C. D. R. Nóbrega and A. T. Martins (2020). "Mapping gene expression in social  
765 anxiety reveals the main brain structures involved in this disorder." Behavioural Brain Research  
766 **394**: 112808.
- 767 Cavodeassi, F., J. Modolell and J. L. Gómez-Skarmeta (2001). "The Iroquois family of genes: from  
768 body building to neural patterning." Development **128**(15): 2847-2855.
- 769 Chen, J., E. E. Bardes, B. J. Aronow and A. G. Jegga (2009). "ToppGene Suite for gene list  
770 enrichment analysis and candidate gene prioritization." Nucleic Acids Res **37**(2): W305-W311.
- 771 Chiang, M.-C., A. J. Huang, M. E. Wintzer, T. Ohshima and T. J. McHugh (2018). "A role for  
772 CA3 in social recognition memory." Behavioural brain research **354**: 22-30.
- 773 Cingolani, P., A. Platts, L. L. Wang, M. Coon, T. Nguyen, L. Wang, S. J. Land, X. Y. Lu and D.  
774 M. Ruden (2012). "A program for annotating and predicting the effects of single nucleotide  
775 polymorphisms, SnpEff: SNPs in the genome of *Drosophila melanogaster* strain w(1118); iso-2;  
776 iso-3." Fly **6**(2): 80-92.
- 777 Colosimo, P. F., C. L. Peichel, K. Nereng, B. K. Blackman, M. D. Shapiro, D. Schluter and D. M.  
778 Kingsley (2004). "The genetic architecture of parallel armor plate reduction in threespine  
779 sticklebacks." PLoS Biol **2**(5): E109.

- 780 Conte, M. A., R. Joshi, E. C. Moore, S. P. Nandamuri, W. J. Gammerdinger, R. B. Roberts, K. L.  
781 Carleton, S. Lien and T. D. Kocher (2019). "Chromosome-scale assemblies reveal the structural  
782 evolution of African cichlid genomes." GigaScience **8**(4).
- 783 Danecek, P., A. Auton, G. Abecasis, C. A. Albers, E. Banks, M. A. DePristo, R. E. Handsaker, G.  
784 Lunter, G. T. Marth, S. T. Sherry, G. McVean, R. Durbin and G. P. A. Grp (2011). "The variant  
785 call format and VCFtools." Bioinformatics **27**(15): 2156-2158.
- 786 Degner, J. F., A. A. Pai, R. Pique-Regi, J.-B. Veyrieras, D. J. Gaffney, J. K. Pickrell, S. De Leon,  
787 K. Michelini, N. Lewellen and G. E. Crawford (2012). "DNase I sensitivity QTLs are a major  
788 determinant of human expression variation." Nature **482**(7385): 390.
- 789 Dougherty, J. D., E. F. Schmidt, M. Nakajima and N. Heintz (2010). "Analytical approaches to  
790 RNA profiling data for the identification of genes enriched in specific cells." Nucleic Acids Res  
791 **38**(13): 4218-4230.
- 792 Fernald, R. D. and K. P. Maruska (2012). "Social information changes the brain." Proc Natl Acad  
793 Sci U S A **109 Suppl 2**: 17194-17199.
- 794 Fields, C., M. D. Adams, O. White and J. C. Venter (1994). "How many genes in the human  
795 genome?" Nature Genetics **7**(3): 345-346.
- 796 Finlay, B. L. and R. B. Darlington (1995). "Linked regularities in the development and evolution  
797 of mammalian brains." Science **268**(5217): 1578-1584.
- 798 Fraser, G. J., R. F. Bloomquist and J. T. Strelman (2008). "A periodic pattern generator for dental  
799 diversity." Bmc Biology **6**(1).
- 800 Fraser, G. J., C. D. Hulsey, R. F. Bloomquist, K. Uyesugi, N. R. Manley and J. T. Strelman  
801 (2009). "An ancient gene network is co-opted for teeth on old and new jaws." PLoS biology **7**(2):  
802 e1000031.
- 803 Greenwood, A. K., A. R. Wark, K. Yoshida and C. L. Peichel (2013). "Genetic and neural  
804 modularity underlie the evolution of schooling behavior in threespine sticklebacks." Curr Biol  
805 **23**(19): 1884-1888.
- 806 Grote, S., K. Prufer, J. Kelso and M. Dannemann (2016). "ABAEnrichment: an R package to test  
807 for gene set expression enrichment in the adult and developing human brain." Bioinformatics  
808 **32**(20): 3201-3203.
- 809 Harris, R. S. (2007). Improved Pairwise Alignment of Genomic DNA. Doctor of Philosophy, The  
810 Pennsylvania State University.
- 811 Hawrylycz, M. J., E. S. Lein, A. L. Guillozet-Bongaarts, E. H. Shen, L. Ng, J. A. Miller, L. N. van  
812 de Lagemaat, K. A. Smith, A. Ebbert, Z. L. Riley, C. Abajian, C. F. Beckmann, A. Bernard, D.  
813 Bertagnolli, A. F. Boe, P. M. Cartagena, M. M. Chakravarty, M. Chapin, J. Chong, R. A. Dalley,  
814 B. David Daly, C. Dang, S. Datta, N. Dee, T. A. Dolbeare, V. Faber, D. Feng, D. R. Fowler, J.  
815 Goldy, B. W. Gregor, Z. Haradon, D. R. Haynor, J. G. Hohmann, S. Horvath, R. E. Howard, A.

- 816 Jeromin, J. M. Jochim, M. Kinnunen, C. Lau, E. T. Lazarz, C. Lee, T. A. Lemon, L. Li, Y. Li, J.  
817 A. Morris, C. C. Overly, P. D. Parker, S. E. Parry, M. Reding, J. J. Royall, J. Schulkin, P. A.  
818 Sequeira, C. R. Slaughterbeck, S. C. Smith, A. J. Sodt, S. M. Sunkin, B. E. Swanson, M. P. Vawter,  
819 D. Williams, P. Wohnoutka, H. R. Zielke, D. H. Geschwind, P. R. Hof, S. M. Smith, C. Koch, S.  
820 G. N. Grant and A. R. Jones (2012). "An anatomically comprehensive atlas of the adult human  
821 brain transcriptome." *Nature* **489**(7416): 391-399.
- 822 Hitti, F. L. and S. A. Siegelbaum (2014). "The hippocampal CA2 region is essential for social  
823 memory." *Nature* **508**(7494): 88-92.
- 824 Hochberg, Y. and Y. Benjamini (1990). "More powerful procedures for multiple significance  
825 testing." *Stat Med* **9**(7): 811-818.
- 826 Johnson, Z. V., E. C. Moore, R. Y. Wong, J. R. Godwin, J. T. Streebman and R. B. Roberts (2020).  
827 "Exploratory behaviour is associated with microhabitat and evolutionary radiation in Lake Malawi  
828 cichlids." *Animal Behaviour* **160**: 121-134.
- 829 Kent, W. J., C. W. Sugnet, T. S. Furey, K. M. Roskin, T. H. Pringle, A. M. Zahler and D. Haussler  
830 (2002). "The human genome browser at UCSC." *Genome research* **12**(6): 996-1006.
- 831 Kocher, T. D. (2004). "Adaptive evolution and explosive speciation: The cichlid fish model."  
832 *Nature Reviews Genetics* **5**(4): 288-298.
- 833 Kratochwil, C. F., Y. Liang, J. Gerwin, J. M. Woltering, S. Urban, F. Henning, G. Machado-  
834 Schiaffino, C. D. Hulsey and A. Meyer (2018). "Agouti-related peptide 2 facilitates convergent  
835 evolution of stripe patterns across cichlid fish radiations." *Science* **362**(6413): 457-460.
- 836 Lamichhaney, S., J. Berglund, M. S. Almen, K. Maqbool, M. Grabherr, A. Martinez-Barrio, M.  
837 Promerova, C. J. Rubin, C. Wang, N. Zamani, B. R. Grant, P. R. Grant, M. T. Webster and L.  
838 Andersson (2015). "Evolution of Darwin's finches and their beaks revealed by genome  
839 sequencing." *Nature* **518**(7539): 371-375.
- 840 Lee, T. H., H. Guo, X. Y. Wang, C. Kim and A. H. Paterson (2014). "SNPhylo: a pipeline to  
841 construct a phylogenetic tree from huge SNP data." *Bmc Genomics* **15**.
- 842 Li, H. and R. Durbin (2009). "Fast and accurate short read alignment with Burrows-Wheeler  
843 transform." *Bioinformatics* **25**(14): 1754-1760.
- 844 Li, H., B. Handsaker, A. Wysoker, T. Fennell, J. Ruan, N. Homer, G. Marth, G. Abecasis, R.  
845 Durbin and S. Genome Project Data Processing (2009). "The Sequence Alignment/Map format  
846 and SAMtools." *Bioinformatics* **25**(16): 2078-2079.
- 847 Loh, Y. H. E., E. Bezault, F. M. Muenzel, R. B. Roberts, R. Swofford, M. Barluenga, C. E. Kidd,  
848 A. E. Howe, F. Di Palma, K. Lindblad-Toh, J. Hey, O. Seehausen, W. Salzburger, T. D. Kocher  
849 and J. T. Streebman (2013). "Origins of Shared Genetic Variation in African Cichlids." *Molecular*  
850 *Biology and Evolution* **30**(4): 906-917.

- 851 Loh, Y. H. E., L. S. Katz, M. C. Mims, T. D. Kocher, S. V. Yi and J. T. Streebman (2008).  
852 "Comparative analysis reveals signatures of differentiation amid genomic polymorphism in Lake  
853 Malawi cichlids." Genome Biology **9**(7).
- 854 Malinsky, M., H. Svardal, A. M. Tyers, E. A. Miska, M. J. Genner, G. F. Turner and R. Durbin  
855 (2018). "Whole-genome sequences of Malawi cichlids reveal multiple radiations interconnected  
856 by gene flow." Nature Ecology & Evolution **2**(12): 1940-1955.
- 857 Maurano, M. T., R. Humbert, E. Rynes, R. E. Thurman, E. Haugen, H. Wang, A. P. Reynolds, R.  
858 Sandstrom, H. Qu and J. Brody (2012). "Systematic localization of common disease-associated  
859 variation in regulatory DNA." Science: 9718-9723.
- 860 McKaye, K. R., S. M. Louda and J. Jay R. Stauffer (1990). "Bower Size and Male Reproductive  
861 Success in a Cichlid Fish Lek." The American Naturalist **135**(5): 597-613.
- 862 McLean, C. Y., P. L. Reno, A. A. Pollen, A. I. Bassan, T. D. Capellini, C. Guenther, V. B. Indjeian,  
863 X. Lim, D. B. Menke, B. T. Schaar, A. M. Wenger, G. Bejerano and D. M. Kingsley (2011).  
864 "Human-specific loss of regulatory DNA and the evolution of human-specific traits." Nature  
865 **471**(7337): 216-219.
- 866 Mesquita, L. T., A. R. Abreu, A. R. de Abreu, A. A. de Souza, S. R. de Noronha, F. C. Silva, G.  
867 S. V. Campos, D. A. Chianca and R. C. de Menezes (2016). "New insights on amygdala:  
868 Basomedial amygdala regulates the physiological response to social novelty." Neuroscience **330**:  
869 181-190.
- 870 Murata, Y., M. Tamura, Y. Aita, K. Fujimura, Y. Murakami, M. Okabe, N. Okada and M. Tanaka  
871 (2010). "Allometric growth of the trunk leads to the rostral shift of the pelvic fin in teleost fishes."  
872 Dev Biol **347**(1): 236-245.
- 873 O'Connell, L. A. and H. A. Hofmann (2012). "Evolution of a vertebrate social decision-making  
874 network." Science **336**(6085): 1154-1157.
- 875 Okhovat, M., A. Berrio, G. Wallace, A. G. Ophir and S. M. Phelps (2015). "Sexual fidelity trade-  
876 offs promote regulatory variation in the prairie vole brain." Science **350**(6266): 1371-1374.
- 877 Olton, D. S., J. T. Becker and G. E. Handelman (1979). "Hippocampus, space, and memory."  
878 Behavioral and Brain sciences **2**(3): 313-322.
- 879 Parnell, N. F. and J. T. Streebman (2013). "Genetic interactions controlling sex and color establish  
880 the potential for sexual conflict in Lake Malawi cichlid fishes." Heredity **110**(3): 239-246.
- 881 Patel, R. K. and M. Jain (2012). "NGS QC Toolkit: A Toolkit for Quality Control of Next  
882 Generation Sequencing Data." Plos One **7**(2): 7.
- 883 Pfenning, A. R., E. Hara, O. Whitney, M. V. Rivas, R. Wang, P. L. Roulhac, J. T. Howard, M.  
884 Wirthlin, P. V. Lovell and G. Ganapathy (2014). "Convergent transcriptional specializations in the  
885 brains of humans and song-learning birds." Science **346**(6215): 1256846.

- 886 Piñero, J., À. Bravo, N. Queralt-Rosinach, A. Gutiérrez-Sacristán, J. Deu-Pons, E. Centeno, J.  
887 García-García, F. Sanz and L. I. Furlong (2017). "DisGeNET: a comprehensive platform  
888 integrating information on human disease-associated genes and variants." Nucleic Acids Research  
889 **45**(D1): D833-D839.
- 890 Rada-Iglesias, A., R. Bajpai, S. Prescott, S. A. Brugmann, T. Swigut and J. Wysocka (2012).  
891 "Epigenomic Annotation of Enhancers Predicts Transcriptional Regulators of Human Neural  
892 Crest." Cell Stem Cell **11**(5): 633-648.
- 893 Ramakrishnan Varadarajan, A., R. Mopuri, J. T. Strelman and P. T. McGrath (2018). "Genome-  
894 wide protein phylogenies for four African cichlid species." BMC Evol Biol **18**(1): 1.
- 895 Ritchie, M. E., B. Phipson, D. Wu, Y. Hu, C. W. Law, W. Shi and G. K. Smyth (2015). "limma  
896 powers differential expression analyses for RNA-sequencing and microarray studies." Nucleic  
897 Acids Res **43**(7): e47.
- 898 Roberts, R. B., Y. Hu, R. C. Albertson and T. D. Kocher (2011). "Craniofacial divergence and  
899 ongoing adaptation via the hedgehog pathway." Proc Natl Acad Sci U S A **108**(32): 13194-13199.
- 900 Roberts, R. B., J. R. Ser and T. D. Kocher (2009). "Sexual conflict resolved by invasion of a novel  
901 sex determiner in Lake Malawi cichlid fishes." Science **326**(5955): 998-1001.
- 902 Robinson, M. D., D. J. McCarthy and G. K. Smyth (2010). "edgeR: a Bioconductor package for  
903 differential expression analysis of digital gene expression data." Bioinformatics **26**(1): 139-140.
- 904 Shapiro, M. D., Z. Kronenberg, C. Li, E. T. Domyan, H. Pan, M. Campbell, H. Tan, C. D. Huff,  
905 H. Hu, A. I. Vickrey, S. C. Nielsen, S. A. Stringham, H. Hu, E. Willerslev, M. T. Gilbert, M.  
906 Yandell, G. Zhang and J. Wang (2013). "Genomic diversity and evolution of the head crest in the  
907 rock pigeon." Science **339**(6123): 1063-1067.
- 908 Shi, Z., G. Luo, L. Fu, Z. Fang, X. Wang and X. Li (2013). "miR-9 and miR-140-5p target FoxP2  
909 and are regulated as a function of the social context of singing behavior in zebra finches." J  
910 Neurosci **33**(42): 16510-16521.
- 911 Siepel, A., G. Bejerano, J. S. Pedersen, A. S. Hinrichs, M. Hou, K. Rosenbloom, H. Clawson, J.  
912 Spieth, L. W. Hillier, S. Richards, G. M. Weinstock, R. K. Wilson, R. A. Gibbs, W. J. Kent, W.  
913 Miller and D. Haussler (2005). "Evolutionarily conserved elements in vertebrate, insect, worm,  
914 and yeast genomes." Genome Res **15**(8): 1034-1050.
- 915 Siepel, A. and D. Haussler (2004). "Phylogenetic estimation of context-dependent substitution  
916 rates by maximum likelihood." Molecular biology and evolution **21**(3): 468-488.
- 917 Simoes-Costa, M. and M. E. Bronner (2015). "Establishing neural crest identity: a gene regulatory  
918 recipe." Development **142**(2): 242-257.
- 919 Strelman, J., C. L. Peichel and D. Parichy (2007). "Developmental genetics of adaptation in  
920 fishes: the case for novelty." Annu. Rev. Ecol. Evol. Syst. **38**: 655-681.

- 921 Streelman, J. T., R. C. Albertson and T. D. Kocher (2003). "Genome mapping of the orange blotch  
922 colour pattern in cichlid fishes." Mol Ecol **12**(9): 2465-2471.
- 923 Streelman, J. T. and P. D. Danley (2003). "The stages of vertebrate evolutionary radiation." Trends  
924 in Ecology & Evolution **18**(3): 126-131.
- 925 Sylvester, J. B., C. A. Rich, Y.-H. E. Loh, M. J. van Staaden, G. J. Fraser and J. T. Streelman  
926 (2010). "Brain diversity evolves via differences in patterning." Proceedings of the National  
927 Academy of Sciences **107**: 9718-9723.
- 928 Sylvester, J. B., C. A. Rich, C. Yi, J. N. Peres, C. Houart and J. T. Streelman (2013). "Competing  
929 signals drive telencephalon diversity." Nature Communications **4**(1): 4.
- 930 Trapnell, C., L. Pachter and S. L. Salzberg (2009). "TopHat: discovering splice junctions with  
931 RNA-Seq." Bioinformatics **25**(9): 1105-1111.
- 932 Tucker, J. A., K. A. Mintzer and M. C. Mullins (2008). "The BMP signaling gradient patterns  
933 dorsoventral tissues in a temporally progressive manner along the anteroposterior axis." Dev Cell  
934 **14**(1): 108-119.
- 935 Van der Auwera, G. A., M. O. Carneiro, C. Hartl, R. Poplin, G. Del Angel, A. Levy-Moonshine,  
936 T. Jordan, K. Shakir, D. Roazen, J. Thibault, E. Banks, K. V. Garimella, D. Altshuler, S. Gabriel  
937 and M. A. DePristo (2013). "From FastQ data to high confidence variant calls: the Genome  
938 Analysis Toolkit best practices pipeline." Curr Protoc Bioinformatics **43**: 11.10.11-33.
- 939 Volff, J. N., C. Korting and M. Scharl (2000). "Multiple lineages of the non-LTR retrotransposon  
940 Rex1 with varying success in invading fish genomes." Mol Biol Evol **17**(11): 1673-1684.
- 941 White, D. E., J. B. Sylvester, T. J. Levario, H. Lu, J. T. Streelman, T. C. McDevitt and M. L. Kemp  
942 (2015). "Quantitative multivariate analysis of dynamic multicellular morphogenic trajectories."  
943 Integrative Biology **7**(7): 825-833.
- 944 Xu, X., A. B. Wells, D. R. O'Brien, A. Nehorai and J. D. Dougherty (2014). "Cell type-specific  
945 expression analysis to identify putative cellular mechanisms for neurogenetic disorders." J  
946 Neurosci **34**(4): 1420-1431.
- 947 York, R. A., C. Patil, K. Abdilleh, Z. V. Johnson, M. A. Conte, M. J. Genner, P. T. McGrath, H.  
948 B. Fraser, R. D. Fernald and J. T. Streelman (2018). "Behavior-dependent cis regulation reveals  
949 genes and pathways associated with bower building in cichlid fishes." Proceedings of the National  
950 Academy of Sciences **115**(47): E11081-e11090.
- 951 Zou, D., L. Chen, D. Deng, D. Jiang, F. Dong, C. McSweeney, Y. Zhou, L. Liu, G. Chen and Y.  
952 Wu (2016). "DREADD in parvalbumin interneurons of the dentate gyrus modulates anxiety, social  
953 interaction and memory extinction." Current Molecular Medicine **16**(1): 91-102.
- 954  
955

956 **Table 1**

957

958

| Species                          | Habitat | Sample Source            | Accession number | UMD2a_map_percent | UMD2a_meanconv | UMD1_map_percent | UMD1_meanconv |
|----------------------------------|---------|--------------------------|------------------|-------------------|----------------|------------------|---------------|
| <i>Metriaclima zebra</i>         | Rock    | Lab bred                 | SRR6322515       | 97.50             | 42.63          | 96.81            | 46.68         |
| <i>Labeotropheus trewavasae</i>  | Rock    | Streelma n Finclip #2238 | SRR6314224       | 98.23             | 14.89          | 97.53            | 16.42         |
| <i>Labeotropheus fuelleborni</i> | Rock    | Lab bred                 | SRR6314225       | 97.78             | 27.02          | 97.09            | 29.79         |
| <i>Cynotilapia afra</i>          | Rock    | Lab bred                 | SRR6314226       | 98.89             | 23.88          | 98.24            | 26.33         |
| <i>Cyathochromis obliquidens</i> | Rock    | Streelma n Finclip #2368 | SRR6314227       | 98.52             | 13.95          | 97.82            | 15.38         |
| <i>Metriaclima patricki</i>      | Rock    | Lab bred                 | SRR6314228       | 97.78             | 37.41          | 97.20            | 41.21         |
| <i>Petrotilapia 'chitimba'</i>   | Rock    | Lab bred                 | SRR6314229       | 95.04             | 27.82          | 94.20            | 30.60         |
| <i>Genyochromis mento</i>        | Rock    | Streelma n Finclip #2170 | SRR6314230       | 91.77             | 8.83           | 91.10            | 9.74          |
| <i>Mchenga conophorus</i>        | Sand    | Lab bred                 | SRR5438125       | 98.39             | 35.44          | 97.70            | 39.05         |
| <i>Ctenopharynx nitidus</i>      | Sand    | Martin Genner [#17]      | SRR5438124       | 97.21             | 30.22          | 96.39            | 33.26         |
| <i>Copadichromis likomae</i>     | Sand    | Martin Genner [#52]      | SRR5438110       | 96.72             | 27.06          | 96.08            | 29.83         |



|                                                                       |      |                                          |                |       |       |       |       |
|-----------------------------------------------------------------------|------|------------------------------------------|----------------|-------|-------|-------|-------|
| <i>Copadichromis</i> sp.<br>"mloto goldcrest"<br><i>sensu Konings</i> | Sand | Lab bred                                 | SRR54<br>38123 | 99.20 | 21.68 | 98.57 | 23.93 |
| <i>Tramitichromis</i><br>"chembe"                                     | Sand | Ryan<br>York                             | SRR54<br>38109 | 87.84 | 16.50 | 87.28 | 18.20 |
| <i>Taeniolethrinops</i><br><i>furcicauda</i>                          | Sand | Martin<br>Genner<br>[#25]                | SRR54<br>38122 | 87.54 | 15.48 | 86.96 | 17.07 |
| <i>Tramitichromis</i><br><i>intermedius</i>                           | Sand | Lab bred                                 | SRR54<br>38118 | 97.81 | 35.60 | 97.04 | 39.29 |
| <i>Copadichromis</i><br><i>virginalis</i> "yellow<br>blaze nkanda"    | Sand | Lab bred                                 | SRR54<br>38119 | 97.96 | 34.54 | 97.28 | 38.07 |
| <i>Fossochromis</i><br><i>rostratus</i>                               | Sand | Streelma<br>n finclip<br>stock<br>[2549] | SRR54<br>38116 | 97.32 | 28.95 | 96.77 | 31.97 |
| <i>Aulonocara</i><br><i>baenschi</i>                                  | Sand | Lab Bred                                 | SRR54<br>38115 | 89.31 | 28.04 | 88.71 | 30.91 |
| <i>Dimidiochromis</i><br><i>compressiceps</i>                         | Sand | Lab Bred                                 | SRR54<br>38114 | 95.78 | 24.62 | 95.18 | 27.16 |
| <i>Mylochromis</i><br><i>sphaerodon</i>                               | Sand | Lab Bred                                 | SRR54<br>38113 | 97.37 | 24.63 | 96.60 | 27.12 |
| <i>Nimbochromis</i><br><i>polystigma</i>                              | Sand | Ryan<br>York                             | SRR54<br>38113 | 81.57 | 16.77 | 81.06 | 18.49 |
| <i>Dimidiochromis</i><br><i>kiwinge</i>                               | Sand | Streelma<br>n finclip<br>stock<br>[2384] | SRR54<br>38112 | 96.46 | 16.33 | 95.93 | 18.03 |

959

960

961 **Table 5**

| <b>Socially Rock F<sub>1</sub> Hybrid Males</b>                     | <b>Socially Sand F<sub>1</sub> Hybrid Males</b>                     | <b>Socially Lone F<sub>1</sub> Hybrid Males</b>                     |
|---------------------------------------------------------------------|---------------------------------------------------------------------|---------------------------------------------------------------------|
| <i>Metriaclima zebra</i> ♂ X<br><i>Tramitichromis intermedius</i> ♀ | <i>Metriaclima zebra</i> ♂ X<br><i>Tramitichromis intermedius</i> ♀ | <i>Metriaclima zebra</i> ♂ X<br><i>Mchenga conophoros</i> ♀         |
| <i>Petrotilapia nigra</i> ♂ X<br><i>Aulonacara baenschi</i> ♀       | <i>Petrotilapia nigra</i> ♂ X<br><i>Aulonacara baenschi</i> ♀       | <i>Labeotropheus feulleborni</i> ♂<br>X <i>Mchenga conophoros</i> ♀ |
| <i>Petrotilapia nigra</i> ♂ X<br><i>Mchenga conophoros</i> ♀        | <i>Petrotilapia nigra</i> male ♂ X<br><i>Mchenga conophoros</i> ♀   |                                                                     |
| <i>Labeotropheus feulleborni</i> ♂<br>X <i>Mchenga conophoros</i> ♀ | <i>Labeotropheus feulleborni</i> ♂<br>X <i>Mchenga conophoros</i> ♀ |                                                                     |

962

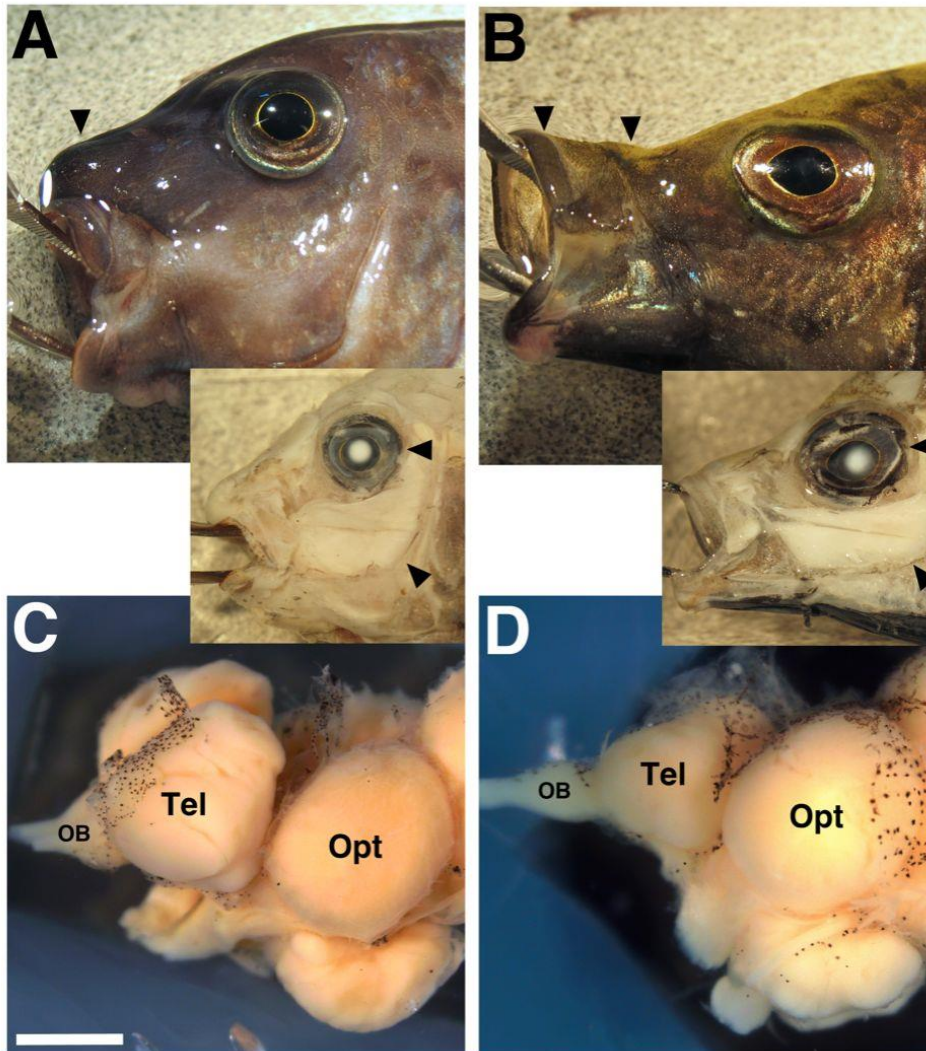

963

964

965 SI Figure 1: Differences in the face (A-B) and brain (C-D) between rock- vs. sand-dwelling

966 Lake Malawi cichlids | Rock-dwellers (A, C) have strongly reinforced jaws, smaller eyes,

967 typically larger cheek muscles, larger olfactory bulbs and telencephala. Sand-dwellers

968 have kinematic, gracile jaws, larger eyes, less robust cheek musculature, and large optic

969 tecta.

970

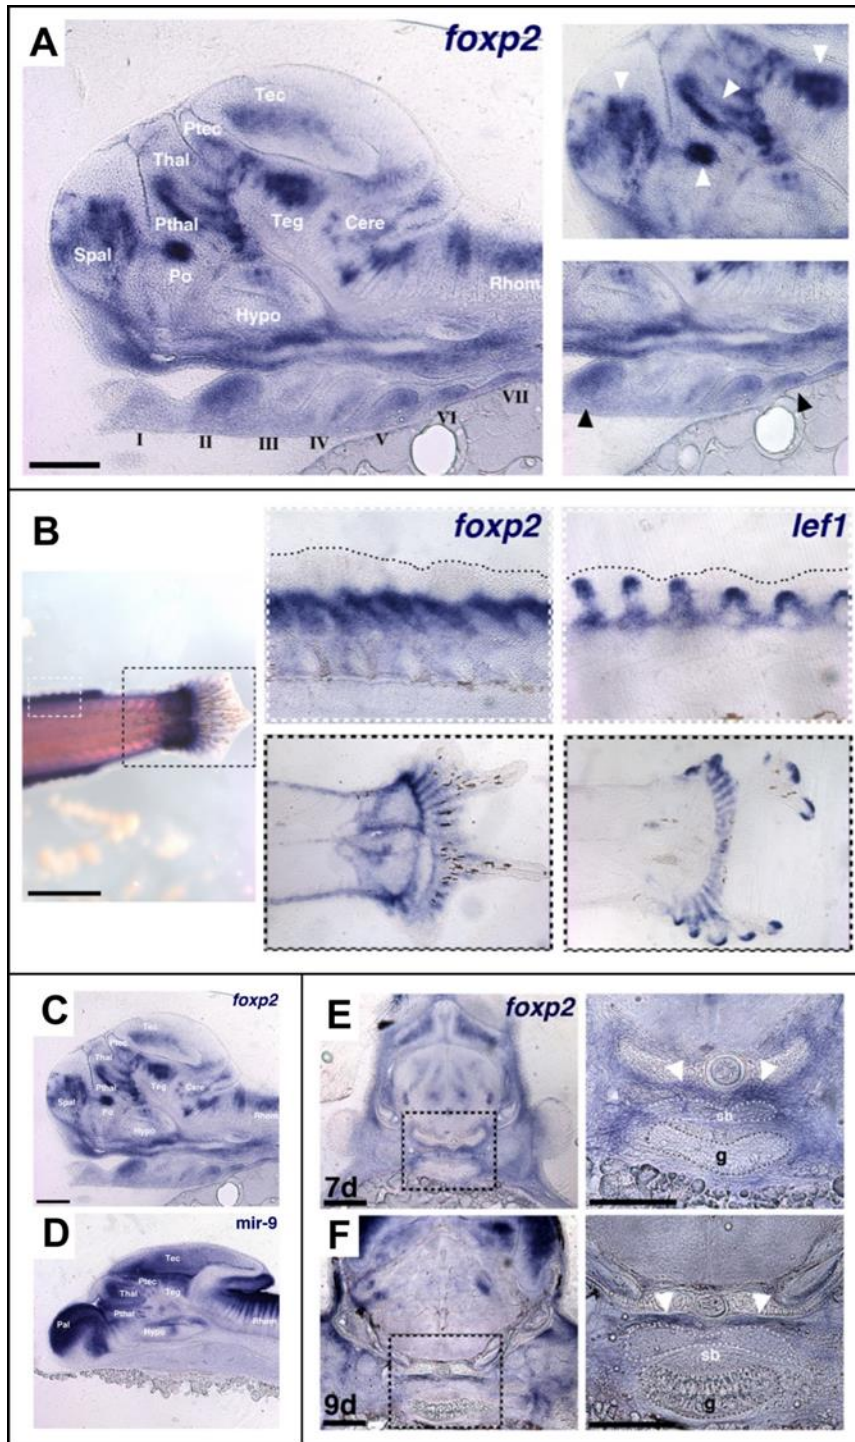

971

972

973 SI Figure 2: Malawi cichlid *foxp2* is expressed in the brain and in all sonic organs | We

974 previously noted novel expression domains for cichlid *foxp2* (Bloomquist, Fowler et al.

975 2017), elaborated here (A) Expression of *foxp2* throughout the brain (regions labeled in

976 white) and developing pharyngeal arches (labeled I – VII) at 5 days post fertilization (dpf).

977 On the far right, white arrows indicate expression in developing ganglia in the midbrain,  
978 diencephalon, pre-optic region, and subpallium. Black arrows point to expression in  
979 pharyngeal arches II and V. (B) *foxp2* expression, along with the WNT pathway  
980 transcription factor *lef1*, in the developing dorsal and tail fins at 7 dpf. The white- and  
981 black-dashed boxes on the right-most panels are zoomed in, midline sections of the  
982 boxes on the left. Adjacent, overlapping expression of *foxp2* and *lef1* are indicative of  
983 interaction between *foxp2* and the WNT pathway (Bonkowsky, Wang et al. 2008). (C) and  
984 (D) show the expression of *foxp2* and *micro RNA-9 (mir-9)*. *mir-9* has been shown to  
985 regulate *foxp2* activity in vertebrates (Shi, Luo et al. 2013) and the anti-correlated  
986 expression patterns in cichlids suggest a similar interaction. (E) and (F) document  
987 expression of *foxp2* in the developing swim bladder at 7 and 9 dpf. The black-dashed  
988 boxed on the left panels indicate the zoomed panels on the right. *foxp2* is generally  
989 expressed in the mesenchyme within and dorsal to the swim bladder at 7 dpf (white  
990 arrows). Once the swim bladder epithelium forms by 9 dpf, *foxp2* expression is localized  
991 dorsally (white arrows). All scale bars are 100 $\mu$ m. Abbreviations: Rhom =  
992 Rhombencephalon, Cere = Cerebellum, Teg = Tegmentum, Tec = Optic Tectum, Ptec =  
993 Pretectum, Thal = Thalamus, Pthal = Prethalamus, Po = Pre-optic area, Hypo =  
994 Hypothalamus, Spal = Subpallium, sb = swim bladder, g = gut.

995

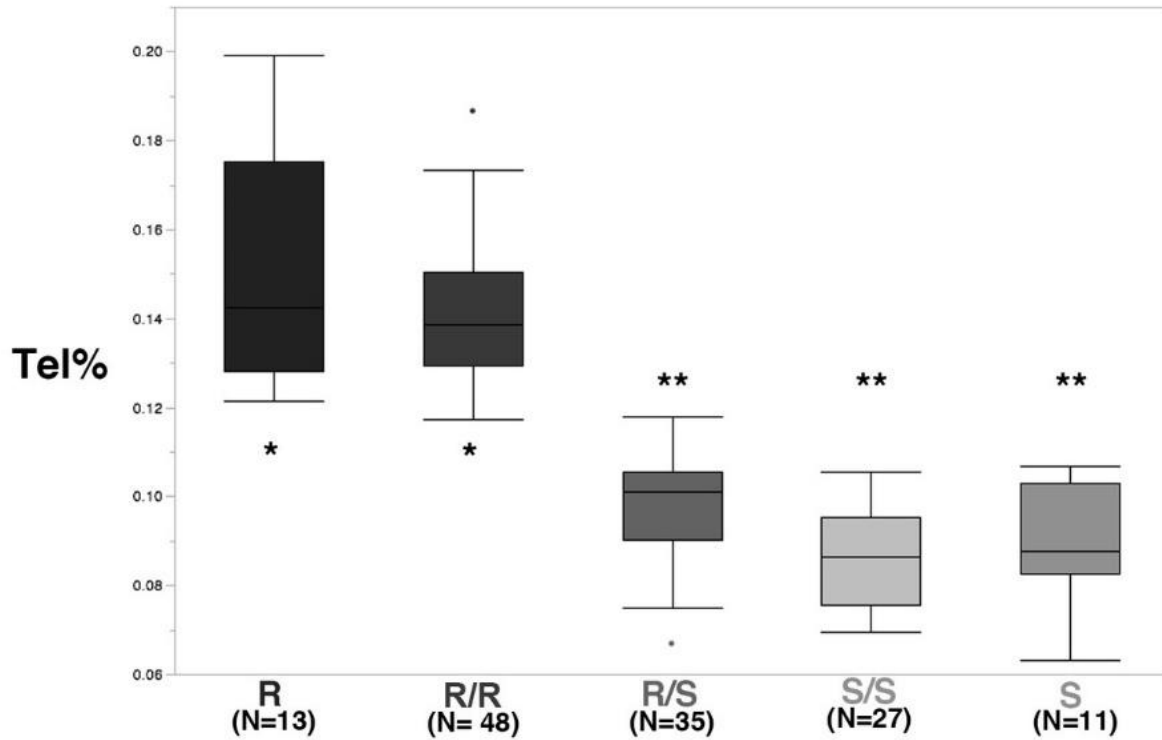

996

997

998 SI Figure 3: The relative size of the telencephalon differs in rock-, sand- and F<sub>2</sub> hybrids  
999 indexed for *irx1b* genotypes | Rock-, sand- and F<sub>2</sub> hybrid individuals indexed for *irx1b*  
1000 genotype were sampled at stages 12-14. We calculated the volume of the telencephalon  
1001 in each individual and express this as a percentage of total forebrain volume. See also  
1002 Figure 2.

1003

1004  
1005  
1006  
1007  
1008  
1009  
1010  
1011  
1012  
1013

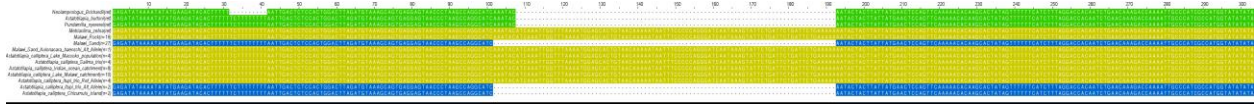

SI Figure 4: Schematic of an InDel located in the 3'UTR of the Malawi cichlid *irx1b* gene. Summary of allelic states: (1) rock-dwelling species possess an 85bp insertion (yellow) with similarity to Rex1 non-LTR retrotransposon, compared to outgroup species (shown in green); (2) sand-dwellers generally lack the insertion and exhibit a 6bp deletion (blue), compared to outgroup species. Note that *Aulonocara baenschi* is heterozygous. Most individuals of *Astatotilapia calliptera* carry the rock- insertion allele; however, individuals at Chizumulu Island and Itupi possess the sand allele.

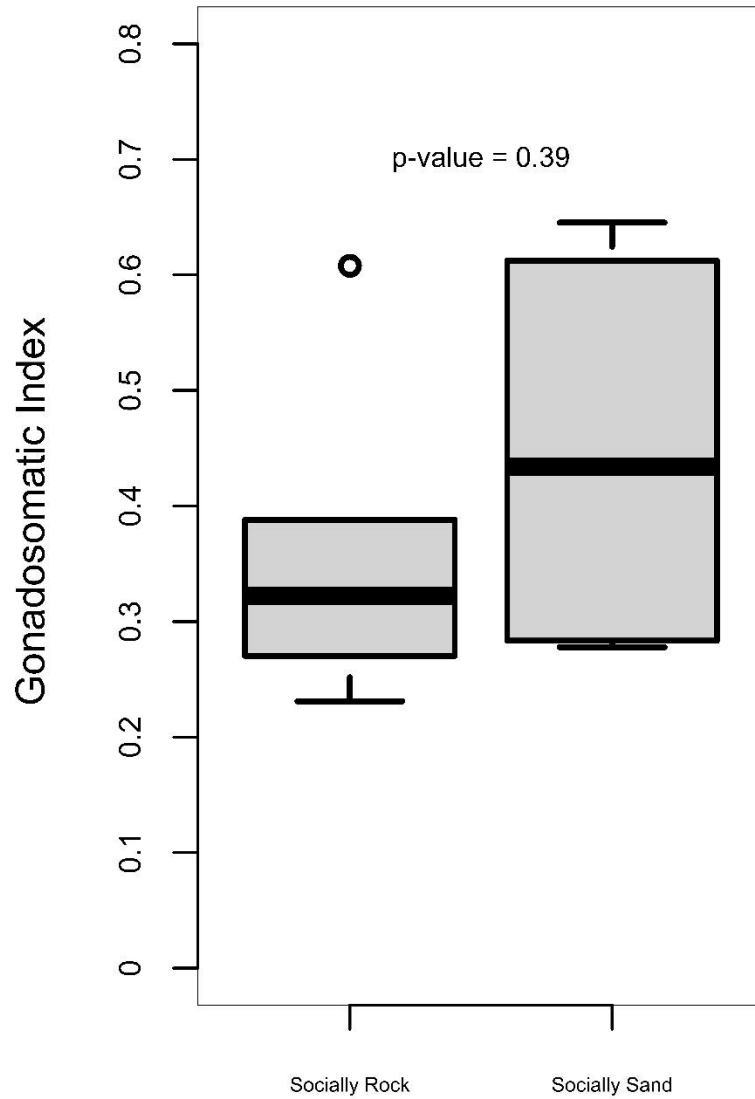

1014

1015

1016 SI Figure 5: Gonadosomatic index (GSI) does not differ amongst males behaving as

1017 social rock- or social sand-. See also Figure 3.

1018



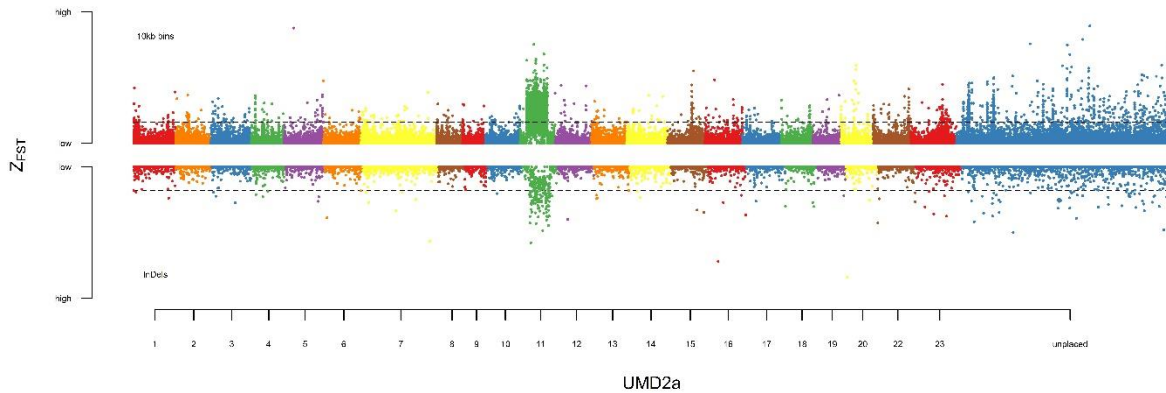

1019

1020

1021 SI Figure 6: Genomic differentiation amongst sand-dwelling species that construct pit vs.  
1022 castle sand bowers | Z-F<sub>ST</sub> plot shows genome divergence amongst pit-digging vs. castle-  
1023 building sand-dweller species, updated by mapping variants to the UMD2a reference  
1024 genome (data from (York, Patil et al. 2018)). Threshold lines indicate 2.5% FDR.

1025
