# Supplementary material for: Genome-enabled inference of functional genetic variants in the face, brain and behavior
Source: bioRxiv preprint, doi:10.1101/2020.10.12.336453, version 1 (2020-10-12)
Supplement: Supplementary Table 2 genomewide identity of enrichment - topfun - SFARI - enhancers [file 336453_file03.xlsx]

## Sheet: Cichlid Gene list
GeneName	CommonName	GFFAnnotation	Scaffold	Start	Stop	Treefam	HGNC	HumanDescription	ZebraDescription
LOC26037642	COX1		NC_027944.1	5472	7061	TF353096	CantFind	CantFind	CantFind
LOC26037644	COX2		NC_027944.1	7217	7907	TF344269	CantFind	CantFind	CantFind
LOC26037650	ND5		NC_027944.1	11982	13820	TF342974	CantFind	CantFind	CantFind
LOC106676409	LOC106676409	uncharacterized LOC106676409	NC_036780.1	118274	118845	NA	NA	NA	NA
LOC101465995	LOC101465995	MTSS1-like protein%2C transcript variant X1	NC_036780.1	166532	244697	TF320619	MTSS1L	metastasis suppressor 1-like [Source:HGNC Symbol;Acc:25094]	metastasis suppressor 1-like [Source:HGNC Symbol;Acc:25094]
LOC101465404	mmp15	matrix metallopeptidase 15%2C transcript variant X1	NC_036780.1	332525	366704	TF352396	MMP15	matrix metallopeptidase 15 (membrane-inserted) [Source:HGNC Symbol;Acc:7161]	matrix metallopeptidase 15 (membrane-inserted) [Source:HGNC Symbol;Acc:7161]
LOC101464927	LOC101464927	adhesion G-protein coupled receptor G1	NC_036780.1	444328	460654	TF321769	GPR56	G protein-coupled receptor 56 [Source:HGNC Symbol;Acc:4512]	G protein-coupled receptor 56 [Source:ZFIN;Acc:ZDB-GENE-030131-3671]
LOC106676434	LOC106676434	adhesion G-protein coupled receptor G5-like	NC_036780.1	480177	483645	TF343734	NA	NA	Uncharacterized protein [Source:UniProtKB/TrEMBL;Acc:E7F434]
LOC101480621	LOC101480621	teashirt homolog 3-like	NC_036780.1	726271	755445	TF328447	TSHZ3	teashirt zinc finger homeobox 3 [Source:HGNC Symbol;Acc:30700]	teashirt zinc finger homeobox 3 [Source:HGNC Symbol;Acc:30700]
LOC112435144	LOC112435144	uncharacterized LOC112435144	NC_036780.1	755505	756485	NoHit	NA	NA	NA
LOC112435146	LOC112435146	vacuolar protein sorting-associated protein 13C-like	NC_036780.1	1362953	1363603	NoHit	NA	NA	NA
LOC101468738	LOC101468738	vacuolar protein sorting-associated protein 13C	NC_036780.1	1363886	1413242	TF300316	VPS13C	vacuolar protein sorting 13 homolog C (S. cerevisiae) [Source:HGNC Symbol;Acc:23594]	Uncharacterized protein [Source:UniProtKB/TrEMBL;Acc:E7F1S0]
LOC101469593	LOC101469593	galanin receptor type 1%2C transcript variant X1	NC_036780.1	1454075	1469061	TF315737	GALR1	galanin receptor 1 [Source:HGNC Symbol;Acc:4132]	Uncharacterized protein [Source:UniProtKB/TrEMBL;Acc:F1QF39]
LOC101470252	trpm1	transient receptor potential cation channel subfamily M member 1	NC_036780.1	1470946	1495178	TF314204	TRPM1	transient receptor potential cation channel, subfamily M, member 1 [Source:HGNC Symbol;Acc:7146]	transient receptor potential cation channel, subfamily M, member 1a [Source:ZFIN;Acc:ZDB-GENE-070112-1372]
LOC101470546	tppp3	tubulin polymerization promoting protein family member 3	NC_036780.1	1497880	1508178	TF314440	TPPP3	tubulin polymerization-promoting protein family member 3 [Source:HGNC Symbol;Acc:24162]	tubulin polymerization-promoting protein family member 3 [Source:ZFIN;Acc:ZDB-GENE-040426-1909]
LOC101470848	zdhhc1	zinc finger DHHC-type containing 1%2C transcript variant X1	NC_036780.1	1517209	1531990	TF317498	ZDHHC1	zinc finger, DHHC-type containing 1 [Source:HGNC Symbol;Acc:17916]	zinc finger, DHHC-type containing 1 [Source:HGNC Symbol;Acc:17916]
LOC112435148	LOC112435148	uncharacterized LOC112435148	NC_036780.1	1547652	1551540	NoHit	NA	NA	NA
LOC101471311	LOC101471311	corticosteroid 11-beta-dehydrogenase isozyme 2	NC_036780.1	1631516	1649306	TF325617	HSD11B2	hydroxysteroid (11-beta) dehydrogenase 2 [Source:HGNC Symbol;Acc:5209]	hydroxysteroid 11-beta dehydrogenase 2 [Source:ZFIN;Acc:ZDB-GENE-030131-6030]
LOC101474524	LOC101474524	CCAAT enhancer binding protein gamma	NC_036780.1	1924243	1928987	TF105009	CEBPG	CCAAT/enhancer binding protein (C/EBP), gamma [Source:HGNC Symbol;Acc:1837]	CCAAT/enhancer binding protein (C/EBP), gamma [Source:ZFIN;Acc:ZDB-GENE-020111-5]
LOC101474797	cebpa	CCAAT enhancer binding protein alpha	NC_036780.1	1932909	1935720	TF105008	CEBPA	CCAAT/enhancer binding protein (C/EBP), alpha [Source:HGNC Symbol;Acc:1833]	CCAAT/enhancer binding protein (C/EBP), alpha [Source:ZFIN;Acc:ZDB-GENE-020111-2]
LOC112429723	LOC112429723		NC_036780.1	2151239	2152204	NA	NA	NA	NA
LOC101481498	LOC101481498	zinc finger protein 536%2C transcript variant X4	NC_036780.1	2325659	2507845	TF332241	ZNF536	zinc finger protein 536 [Source:HGNC Symbol;Acc:29025]	zinc finger protein 536 [Source:ZFIN;Acc:ZDB-GENE-030616-624]
LOC101482763	ccne1	cyclin E1%2C transcript variant X3	NC_036780.1	2686135	2691728	TF101005	CCNE1	cyclin E1 [Source:HGNC Symbol;Acc:1589]	cyclin E1 [Source:ZFIN;Acc:ZDB-GENE-980526-168]
LOC101481592	LOC101481592	tumor protein p53-inducible nuclear protein 1%2C transcript variant X1	NC_036780.1	2697990	2699719	TF333017	TP53INP1	tumor protein p53 inducible nuclear protein 1 [Source:HGNC Symbol;Acc:18022]	tumor protein p53 inducible nuclear protein 2 [Source:HGNC Symbol;Acc:16104]
LOC101480916	LOC101480916	protein C19orf12 homolog%2C transcript variant X2	NC_036780.1	2699352	2704065	TF323308	C19orf12	chromosome 19 open reading frame 12 [Source:HGNC Symbol;Acc:25443]	chromosome 19 open reading frame 12 [Source:HGNC Symbol;Acc:25443]
LOC101483622	LOC101483622	protein C19orf12-like	NC_036780.1	2707132	2708259	TF323308	C19orf12	chromosome 19 open reading frame 12 [Source:HGNC Symbol;Acc:25443]	chromosome 19 open reading frame 12 [Source:HGNC Symbol;Acc:25443]
LOC101483913	LOC101483913	protein C19orf12%2C transcript variant X1	NC_036780.1	2716172	2720006	TF323308	C19orf12	chromosome 19 open reading frame 12 [Source:HGNC Symbol;Acc:25443]	chromosome 19 open reading frame 12 [Source:HGNC Symbol;Acc:25443]
LOC101484736	cd81	CD81 molecule	NC_036780.1	2762470	2791092	TF352895	CD81	CD81 molecule [Source:HGNC Symbol;Acc:1701]	CD81 antigen [Source:ZFIN;Acc:ZDB-GENE-000831-5]
LOC101485023	LOC101485023	plakophilin-3%2C transcript variant X1	NC_036780.1	2796017	2820777	TF343649	NA	NA	plakophilin 3 [Source:ZFIN;Acc:ZDB-GENE-060512-114]
LOC112430015	LOC112430015	pleckstrin homology domain-containing family F member 2-like	NC_036780.1	2829027	2830564	TF315235	PLEKHF2	pleckstrin homology domain containing, family F (with FYVE domain) member 2 [Source:HGNC Symbol;Acc:20757]	pleckstrin homology domain containing, family F (with FYVE domain) member 1 [Source:ZFIN;Acc:ZDB-GENE-040426-1289]
LOC101487123	nadsyn1	NAD synthetase 1%2C transcript variant X1	NC_036780.1	2867794	2880534	TF105731	NA	NA	NAD synthetase 1 [Source:ZFIN;Acc:ZDB-GENE-070615-22]	None	NANoHomolog
LOC101486833	LOC101486833	docking protein 4%2C transcript variant X1	NC_036780.1	2881372	2940527	TF324994	DOK4	docking protein 4 [Source:HGNC Symbol;Acc:19868]	Uncharacterized protein [Source:UniProtKB/TrEMBL;Acc:E7F0P2]
LOC101487417	ccdc102a	coiled-coil domain containing 102A	NC_036780.1	2978539	3031473	TF320856	CCDC102A	coiled-coil domain containing 102A [Source:HGNC Symbol;Acc:28097]	coiled-coil domain containing 102A [Source:ZFIN;Acc:ZDB-GENE-030131-4044]	None	NANoHomolog
LOC101487888	LOC101487888	gamma-taxilin%2C transcript variant X11	NC_036780.1	3034213	3042124	TF318595	TXLNG	taxilin gamma [Source:HGNC Symbol;Acc:18578]	taxilin gamma [Source:ZFIN;Acc:ZDB-GENE-060616-122]
LOC101465514	LOC101465514	histone-binding protein RBBP7%2C transcript variant X1	NC_036780.1	3043429	3055835	TF106485	RBBP7	retinoblastoma binding protein 7 [Source:HGNC Symbol;Acc:9890]	retinoblastoma binding protein 4, like [Source:ZFIN;Acc:ZDB-GENE-030131-848]
LOC101466092	LOC101466092	testis-specific serine/threonine-protein kinase 1-like	NC_036780.1	3074876	3077437	TF352374	TSSK2	testis-specific serine kinase 2 [Source:HGNC Symbol;Acc:11401]	NA
LOC101466392	bnc1	basonuclin 1%2C transcript variant X2	NC_036780.1	3161278	3194172	TF350399	BNC1	basonuclin 1 [Source:HGNC Symbol;Acc:1081]	basonuclin 1 [Source:HGNC Symbol;Acc:1081]
LOC101467334	LOC101467334	endophilin-A3%2C transcript variant X1	NC_036780.1	3217702	3241668	TF313281	SH3GL3	SH3-domain GRB2-like 3 [Source:HGNC Symbol;Acc:10832]	SH3-domain GRB2-like 3a [Source:ZFIN;Acc:ZDB-GENE-070112-242]
LOC101469981	adamtsl3	ADAMTS like 3%2C transcript variant X1	NC_036780.1	3273253	3472321	TF351125	ADAMTSL3	ADAMTS-like 3 [Source:HGNC Symbol;Acc:14633]	Uncharacterized protein [Source:UniProtKB/TrEMBL;Acc:E7FBX1]
LOC101470955	mex3b	mex-3 RNA binding family member B	NC_036780.1	3595878	3600820	TF315107	MEX3B	mex-3 homolog B (C. elegans) [Source:HGNC Symbol;Acc:25297]	mex-3 homolog B (C. elegans) [Source:ZFIN;Acc:ZDB-GENE-030131-2628]
LOC106675791	LOC106675791	uncharacterized LOC106675791	NC_036780.1	3630434	3630798	NA	NA	NA	NA
LOC101471229	rpl12	ribosomal protein L12	NC_036780.1	3751291	3754929	TF300123	RPL12	ribosomal protein L12 [Source:HGNC Symbol;Acc:10302]	ribosomal protein L12 [Source:ZFIN;Acc:ZDB-GENE-030131-5297]
LOC106675778	LOC106675778	interleukin-17B%2C transcript variant X1	NC_036780.1	3875564	3880560	TF314701	IL25	interleukin 25 [Source:HGNC Symbol;Acc:13765]	interleukin 17d [Source:ZFIN;Acc:ZDB-GENE-061031-4]
LOC101474355	LOC101474355	uncharacterized LOC101474355%2C transcript variant X1	NC_036780.1	3883240	3888417	NoHit	NA	NA	NA
LOC101481794	gpn1	GPN-loop GTPase 1%2C transcript variant X1	NC_036780.1	3889071	3895790	TF313204	GPN1	GPN-loop GTPase 1 [Source:HGNC Symbol;Acc:17030]	GPN-loop GTPase 1 [Source:HGNC Symbol;Acc:17030]
LOC101485115	LOC101485115	probable phosphatase phospho2	NC_036780.1	4463926	4466670	TF300112	PHOSPHO2	phosphatase, orphan 2 [Source:HGNC Symbol;Acc:28316]	phosphatase, orphan 2 [Source:ZFIN;Acc:ZDB-GENE-080204-104]
LOC101484915	LOC101484915	uncharacterized LOC101484915	NC_036780.1	4655310	4655877	NA	NA	NA	NA
LOC101484085	cdh8	cadherin 8%2C transcript variant X3	NC_036780.1	4686794	4785747	TF329887	CDH8	cadherin 8, type 2 [Source:HGNC Symbol;Acc:1767]	Uncharacterized protein [Source:UniProtKB/TrEMBL;Acc:F1QAB8]
LOC106675329	LOC106675329	uncharacterized LOC106675329	NC_036780.1	5113238	5116921	TF333856	NA	NA	si:ch211-51a19.5 [Source:ZFIN;Acc:ZDB-GENE-041014-366]
LOC112435321	LOC112435321	uncharacterized LOC112435321	NC_036780.1	5194273	5195079	NA	NA	NA	NA
LOC101482470	adamts18	ADAM metallopeptidase with thrombospondin type 1 motif 18%2C transcript variant X1	NC_036780.1	5240478	5300488	TF313537	ADAMTS18	ADAM metallopeptidase with thrombospondin type 1 motif, 18 [Source:HGNC Symbol;Acc:17110]	ADAM metallopeptidase with thrombospondin type 1 motif, 18 [Source:ZFIN;Acc:ZDB-GENE-070815-1]
LOC101483607	itfg1	integrin alpha FG-GAP repeat containing 1	NC_036780.1	5453161	5620170	TF105620	ITFG1	integrin alpha FG-GAP repeat containing 1 [Source:HGNC Symbol;Acc:30697]	Uncharacterized protein [Source:UniProtKB/TrEMBL;Acc:E7F1C8]
LOC111500686	trnat-agu	tRNA-Thr	NC_036780.1	5662226	5662299	NA	NA	NA	NA
LOC101480823	rhpn2	rhophilin Rho GTPase binding protein 2%2C transcript variant X1	NC_036780.1	5701707	5727033	TF323502	RHPN2	rhophilin, Rho GTPase binding protein 2 [Source:HGNC Symbol;Acc:19974]	rhophilin, Rho GTPase binding protein 2 [Source:ZFIN;Acc:ZDB-GENE-030131-9927]
LOC101478337	LOC101478337	myocyte-specific enhancer factor 2A%2C transcript variant X3	NC_036780.1	5882106	5927621	TF314067	MEF2A	myocyte enhancer factor 2A [Source:HGNC Symbol;Acc:6993]	myocyte enhancer factor 2A [Source:HGNC Symbol;Acc:6993]
LOC101477216	LOC101477216	COUP transcription factor 2%2C transcript variant X1	NC_036780.1	6006191	6012976	TF352097	NR2F6	nuclear receptor subfamily 2, group F, member 6 [Source:HGNC Symbol;Acc:7977]	nuclear receptor subfamily 2, group F, member 5 [Source:ZFIN;Acc:ZDB-GENE-990415-253]
LOC101475483	eprs	glutamyl-prolyl-tRNA synthetase%2C transcript variant X1	NC_036780.1	6137169	6160812	TF300380	EPRS	glutamyl-prolyl-tRNA synthetase [Source:HGNC Symbol;Acc:3418]	glutamyl-prolyl-tRNA synthetase [Source:ZFIN;Acc:ZDB-GENE-030131-638]
LOC101473568	LOC101473568	prepronociceptin	NC_036780.1	6271437	6289076	TF332620	PNOC	prepronociceptin [Source:HGNC Symbol;Acc:9163]	prepronociceptin a [Source:ZFIN;Acc:ZDB-GENE-101229-1]
LOC101471509	ntrk3	neurotrophic receptor tyrosine kinase 3%2C transcript variant X1	NC_036780.1	6474536	6699629	TF106465	NTRK3	neurotrophic tyrosine kinase, receptor, type 3 [Source:HGNC Symbol;Acc:8033]	Tyrosine-protein kinase receptor [Source:UniProtKB/TrEMBL;Acc:H9GXM2]
LOC101471219	akap13	A-kinase anchoring protein 13%2C transcript variant X1	NC_036780.1	6901548	7022627	TF325887	AKAP13	A kinase (PRKA) anchor protein 13 [Source:HGNC Symbol;Acc:371]	Uncharacterized protein [Source:UniProtKB/TrEMBL;Acc:E7FFR0]
LOC101466477	LOC101466477	semaphorin-7A%2C transcript variant X1	NC_036780.1	7332692	7364273	TF333698	SEMA7A	semaphorin 7A, GPI membrane anchor (John Milton Hagen blood group) [Source:HGNC Symbol;Acc:10741]	si:ch211-113g11.6 [Source:ZFIN;Acc:ZDB-GENE-060503-473]
LOC101464639	edc3	enhancer of mRNA decapping 3%2C transcript variant X1	NC_036780.1	7510939	7534845	TF324695	EDC3	enhancer of mRNA decapping 3 homolog (S. cerevisiae) [Source:HGNC Symbol;Acc:26114]	enhancer of mRNA decapping 3 homolog (S. cerevisiae) [Source:ZFIN;Acc:ZDB-GENE-050522-287]
LOC101464167	csk	C-terminal Src kinase%2C transcript variant X1	NC_036780.1	7538415	7591115	TF351634	CSK	c-src tyrosine kinase [Source:HGNC Symbol;Acc:2444]	c-src tyrosine kinase [Source:ZFIN;Acc:ZDB-GENE-061103-493]
LOC101486549	lrrc49	leucine rich repeat containing 49%2C transcript variant X1	NC_036780.1	7688249	7723871	TF324815	LRRC49	leucine rich repeat containing 49 [Source:HGNC Symbol;Acc:25965]	leucine rich repeat containing 6 [Source:ZFIN;Acc:ZDB-GENE-040827-2]
LOC101486251	thsd4	thrombospondin type 1 domain containing 4%2C transcript variant X1	NC_036780.1	7727599	7775726	TF316874	THSD4	thrombospondin, type I, domain containing 4 [Source:HGNC Symbol;Acc:25835]	ADAMTS-like 7 [Source:ZFIN;Acc:ZDB-GENE-070816-2]
LOC112435465	LOC112435465	uncharacterized LOC112435465	NC_036780.1	7896817	7898841	NA	NA	NA	NA
LOC101485483	LOC101485483	carbohydrate sulfotransferase 8	NC_036780.1	7932317	8058568	TF325581	CHST8	carbohydrate (N-acetylgalactosamine 4-0) sulfotransferase 8 [Source:HGNC Symbol;Acc:15993]	carbohydrate (N-acetylgalactosamine 4-0) sulfotransferase 8 [Source:ZFIN;Acc:ZDB-GENE-090410-1]
LOC101484822	kctd15	potassium channel tetramerization domain containing 15%2C transcript variant X2	NC_036780.1	8075546	8102619	TF315332	KCTD15	potassium channel tetramerisation domain containing 15 [Source:HGNC Symbol;Acc:23297]	potassium channel tetramerisation domain containing 15a [Source:ZFIN;Acc:ZDB-GENE-041010-105]
LOC101480906	LOC101480906	transcription initiation factor TFIID subunit 4%2C transcript variant X1	NC_036780.1	8103204	8204542	TF316520	TAF4	TAF4 RNA polymerase II, TATA box binding protein (TBP)-associated factor, 135kDa [Source:HGNC Symbol;Acc:11537]	si:dkey-219c3.2 [Source:ZFIN;Acc:ZDB-GENE-090313-238]
LOC101483230	LOC101483230	WT1 interacting protein	NC_036780.1	8298185	8335054	TF320310	WTIP	Wilms tumor 1 interacting protein [Source:HGNC Symbol;Acc:20964]	Wilms tumor 1 interacting protein [Source:ZFIN;Acc:ZDB-GENE-050419-261]
LOC101481003	heatr3	HEAT repeat containing 3	NC_036780.1	8354095	8363293	TF324159	HEATR3	HEAT repeat containing 3 [Source:HGNC Symbol;Acc:26087]	HEAT repeat containing 3 [Source:ZFIN;Acc:ZDB-GENE-040426-1876]
LOC101480725	tent4b	terminal nucleotidyltransferase 4B	NC_036780.1	8366580	8395943	TF313939	PAPD5	PAP associated domain containing 5 [Source:HGNC Symbol;Acc:30758]	PAP associated domain containing 5 [Source:HGNC Symbol;Acc:30758]
LOC101480238	adcy7	adenylate cyclase 7%2C transcript variant X1	NC_036780.1	8398472	8463067	TF313845	ADCY7	adenylate cyclase 7 [Source:HGNC Symbol;Acc:238]	adenylate cyclase 7 [Source:ZFIN;Acc:ZDB-GENE-040713-1]
LOC101479935	brd7	bromodomain containing 7	NC_036780.1	8463078	8478879	TF106439	BRD7	bromodomain containing 7 [Source:HGNC Symbol;Acc:14310]	bromodomain containing 7 [Source:ZFIN;Acc:ZDB-GENE-040426-2687]
LOC101478616	sall1	spalt like transcription factor 1	NC_036780.1	8705077	8717449	TF317003	SALL1	sal-like 1 (Drosophila) [Source:HGNC Symbol;Acc:10524]	sal-like 1a (Drosophila) [Source:ZFIN;Acc:ZDB-GENE-020228-2]
LOC101480613	tox3	TOX high mobility group box family member 3	NC_036780.1	8958379	8996274	TF106481	TOX3	TOX high mobility group box family member 3 [Source:HGNC Symbol;Acc:11972]	TOX high mobility group box family member 3 [Source:ZFIN;Acc:ZDB-GENE-090312-209]
LOC112436429	LOC112436429	uncharacterized LOC112436429	NC_036780.1	9042888	9044862	TF329121	CantFind	CantFind	CantFind
LOC101476178	chd9	chromodomain helicase DNA binding protein 9%2C transcript variant X1	NC_036780.1	9172135	9246179	TF313572	CHD9	chromodomain helicase DNA binding protein 9 [Source:HGNC Symbol;Acc:25701]	chromodomain helicase DNA binding protein 9 [Source:ZFIN;Acc:ZDB-GENE-030131-497]
LOC101475007	fto	FTO%2C alpha-ketoglutarate dependent dioxygenase	NC_036780.1	9311633	9426021	TF333296	FTO	fat mass and obesity associated [Source:HGNC Symbol;Acc:24678]	fat mass and obesity associated [Source:ZFIN;Acc:ZDB-GENE-061108-1]
LOC101474339	irx3	iroquois homeobox 3%2C transcript variant X1	NC_036780.1	9470210	9473544	TF319371	IRX3	iroquois homeobox 3 [Source:HGNC Symbol;Acc:14360]	iroquois homeobox protein 3a [Source:ZFIN;Acc:ZDB-GENE-991119-5]
LOC101474162	LOC101474162	uncharacterized LOC101474162%2C transcript variant X1	NC_036780.1	9661713	9671372	NA	NA	NA	NA
LOC101473866	irx5	iroquois homeobox 5	NC_036780.1	9672912	9676567	TF319371	IRX5	iroquois homeobox 5 [Source:HGNC Symbol;Acc:14361]	iroquois homeobox protein 5a [Source:ZFIN;Acc:ZDB-GENE-010716-2]
LOC101472968	irx6	iroquois homeobox 6%2C transcript variant X1	NC_036780.1	9821981	9827094	TF319371	IRX6	iroquois homeobox 6 [Source:HGNC Symbol;Acc:14675]	iroquois homeobox protein 6a [Source:ZFIN;Acc:ZDB-GENE-040712-5]
LOC101471905	slc6a2	solute carrier family 6 member 2%2C transcript variant X2	NC_036780.1	9905505	9932440	TF343812	SLC6A2	solute carrier family 6 (neurotransmitter transporter, noradrenalin), member 2 [Source:HGNC Symbol;Acc:11048]	solute carrier family 6 (neurotransmitter transporter, noradrenalin), member 2 [Source:ZFIN;Acc:ZDB-GENE-110408-4]
LOC101469128	LOC101469128	CUGBP Elav-like family member 6%2C transcript variant X1	NC_036780.1	10034350	10185229	TF314924	CELF6	CUGBP, Elav-like family member 6 [Source:HGNC Symbol;Acc:14059]	CUGBP, Elav-like family member 4 [Source:ZFIN;Acc:ZDB-GENE-040718-300]
LOC101466081	LOC101466081	potassium/sodium hyperpolarization-activated cyclic nucleotide-gated channel 4	NC_036780.1	10302847	10375678	TF352492	NA	NA	NA
LOC101465592	nptn	neuroplastin%2C transcript variant X1	NC_036780.1	10390660	10416178	TF326759	NPTN	neuroplastin [Source:HGNC Symbol;Acc:17867]	neuroplastin b [Source:ZFIN;Acc:ZDB-GENE-040426-1821]
LOC106676553	LOC106676553	GTPase IMAP family member 8%2C transcript variant X1	NC_036780.1	10436378	10439428	TF330845	GIMAP4	GTPase, IMAP family member 4 [Source:HGNC Symbol;Acc:21872]	si:dkeyp-69e1.8 [Source:ZFIN;Acc:ZDB-GENE-070912-676]
LOC106675051	LOC106675051	uncharacterized LOC106675051	NC_036780.1	10444866	10447308	NA	NA	NA	NA
LOC101464260	LOC101464260	UDP-glucuronosyltransferase 2A2	NC_036780.1	10455919	10458777	TF315472	UGT8	UDP glycosyltransferase 8 [Source:HGNC Symbol;Acc:12555]	UDP glucuronosyltransferase 5 family, polypeptide C3 [Source:ZFIN;Acc:ZDB-GENE-050419-23]
LOC101464540	chrna5	cholinergic receptor nicotinic alpha 5 subunit%2C transcript variant X1	NC_036780.1	10459900	10467539	TF315605	CHRNA5	cholinergic receptor, nicotinic, alpha 5 (neuronal) [Source:HGNC Symbol;Acc:1959]	cholinergic receptor, nicotinic, alpha 5 [Source:ZFIN;Acc:ZDB-GENE-050417-440]
LOC101486357	shf	Src homology 2 domain containing F%2C transcript variant X1	NC_036780.1	10597092	10691342	TF325799	SHF	Src homology 2 domain containing F [Source:HGNC Symbol;Acc:25116]	Src homology 2 domain containing transforming protein D, b [Source:ZFIN;Acc:ZDB-GENE-030131-6059]
LOC101485578	cd276	CD276 molecule	NC_036780.1	10707126	10778919	TF331083	CD276	CD276 molecule [Source:HGNC Symbol;Acc:19137]	CD276 molecule [Source:ZFIN;Acc:ZDB-GENE-070112-452]
LOC101484914	lg1h15orf59	linkage group 1 C15orf59 homolog%2C transcript variant X1	NC_036780.1	10864638	10913111	TF332382	C15orf59	chromosome 15 open reading frame 59 [Source:HGNC Symbol;Acc:33753]	chromosome 15 open reading frame 59 [Source:HGNC Symbol;Acc:33753]
LOC101484445	LOC101484445	lysyl oxidase homolog 1	NC_036780.1	11030915	11048137	TF326061	LOXL1	lysyl oxidase-like 1 [Source:HGNC Symbol;Acc:6665]	lysyl oxidase-like 1 [Source:ZFIN;Acc:ZDB-GENE-060503-693]
LOC101483998	LOC101483998	secretory carrier-associated membrane protein 5%2C transcript variant X1	NC_036780.1	11062674	11070170	TF313797	SCAMP5	secretory carrier membrane protein 5 [Source:HGNC Symbol;Acc:30386]	secretory carrier membrane protein 5 [Source:HGNC Symbol;Acc:30386]
LOC101482850	LOC101482850	protein unc-13 homolog C%2C transcript variant X1	NC_036780.1	11170321	11280114	TF312844	UNC13C	unc-13 homolog C (C. elegans) [Source:HGNC Symbol;Acc:23149]	unc-13 homolog C (C. elegans) [Source:ZFIN;Acc:ZDB-GENE-060503-478]
LOC112434995	LOC112434995	uncharacterized LOC112434995	NC_036780.1	11340422	11341100	NA	NA	NA	NA
LOC101482175	LOC101482175	hepatocyte nuclear factor 6%2C transcript variant X1	NC_036780.1	11456981	11468386	TF318206	ONECUT1	one cut homeobox 1 [Source:HGNC Symbol;Acc:8138]	one cut domain, family member 1 [Source:ZFIN;Acc:ZDB-GENE-040426-1469]
LOC101481578	fam214a	family with sequence similarity 214 member A	NC_036780.1	11472868	11508115	TF325496	FAM214A	family with sequence similarity 214, member A [Source:HGNC Symbol;Acc:25609]	family with sequence similarity 214, member A [Source:ZFIN;Acc:ZDB-GENE-050419-204]
LOC101480822	myo5a	myosin VA%2C transcript variant X1	NC_036780.1	11520959	11586574	TF328771	MYO5A	myosin VA (heavy chain 12, myoxin) [Source:HGNC Symbol;Acc:7602]	myosin VAa [Source:ZFIN;Acc:ZDB-GENE-041027-2]
LOC101480331	LOC101480331	anti-apoptotic protein NR13%2C transcript variant X2	NC_036780.1	11606645	11611180	TF334762	BCL2L10	BCL2-like 10 (apoptosis facilitator) [Source:HGNC Symbol;Acc:993]	BCL2-like 10 (apoptosis facilitator) [Source:ZFIN;Acc:ZDB-GENE-030825-2]
LOC101480136	LOC101480136	uncharacterized LOC101480136	NC_036780.1	11616119	11623290	NA	NA	NA	NA
LOC101479476	trpm7	transient receptor potential cation channel subfamily M member 7%2C transcript variant X1	NC_036780.1	11625402	11699159	TF314204	TRPM7	transient receptor potential cation channel, subfamily M, member 7 [Source:HGNC Symbol;Acc:17994]	transient receptor potential cation channel, subfamily M, member 7 [Source:ZFIN;Acc:ZDB-GENE-021115-2]
LOC101478803	sppl2a	signal peptide peptidase like 2A%2C transcript variant X1	NC_036780.1	11702319	11718623	TF319186	SPPL2A	signal peptide peptidase like 2A [Source:HGNC Symbol;Acc:30227]	signal peptide peptidase-like 2 [Source:ZFIN;Acc:ZDB-GENE-030131-4265]
LOC101477985	LOC101477985	RNA polymerase II elongation factor ELL	NC_036780.1	11754501	11789782	TF326161	ELL2	elongation factor, RNA polymerase II, 2 [Source:HGNC Symbol;Acc:17064]	elongation factor RNA polymerase II-like 3 [Source:HGNC Symbol;Acc:23113]
LOC101477407	LOC101477407	semaphorin-4B%2C transcript variant X1	NC_036780.1	11837859	11901346	TF352903	SEMA4B	sema domain, immunoglobulin domain (Ig), transmembrane domain (TM) and short cytoplasmic domain, (semaphorin) 4B [Source:HGNC Symbol;Acc:10730]	sema domain, immunoglobulin domain (Ig), transmembrane domain (TM) and short cytoplasmic domain, (semaphorin) 4Ba [Source:ZFIN;Acc:ZDB-GENE-070705-31]
LOC101477128	LOC101477128	zinc finger protein 710%2C transcript variant X2	NC_036780.1	11932343	11961283	TF331510	ZNF710	zinc finger protein 710 [Source:HGNC Symbol;Acc:25352]	zinc finger protein 710 [Source:HGNC Symbol;Acc:25352]
LOC111500685	trnah-gug	tRNA-His	NC_036780.1	12128054	12128125	NA	NA	NA	NA
LOC101471800	LOC101471800	transmembrane protein 266	NC_036780.1	12291561	12342818	TF332271	C15orf27	chromosome 15 open reading frame 27 [Source:HGNC Symbol;Acc:26763]	chromosome 15 open reading frame 27 [Source:HGNC Symbol;Acc:26763]
LOC101469216	nfatc3	nuclear factor of activated T cells 3%2C transcript variant X1	NC_036780.1	12479644	12539693	TF326480	NFATC3	nuclear factor of activated T-cells, cytoplasmic, calcineurin-dependent 3 [Source:HGNC Symbol;Acc:7777]	Uncharacterized protein [Source:UniProtKB/TrEMBL;Acc:E7FE12]
LOC101468130	LOC101468130	epithelial splicing regulatory protein 2%2C transcript variant X1	NC_036780.1	12542267	12565978	TF316157	ESRP2	epithelial splicing regulatory protein 2 [Source:HGNC Symbol;Acc:26152]	epithelial splicing regulatory protein 2 [Source:ZFIN;Acc:ZDB-GENE-030131-9824]
LOC101466281	styx	serine/threonine/tyrosine interacting protein	NC_036780.1	12593753	12600570	TF350439	STYX	serine/threonine/tyrosine interacting protein [Source:HGNC Symbol;Acc:11447]	serine/threonine/tyrosine interacting protein [Source:ZFIN;Acc:ZDB-GENE-050522-45]
LOC106675107	LOC106675107	uncharacterized LOC106675107	NC_036780.1	12751579	12757018	TF342704	NA	NA	si:ch211-193k19.2 [Source:ZFIN;Acc:ZDB-GENE-060503-203]
LOC101465795	mdga1	MAM domain containing glycosylphosphatidylinositol anchor 1%2C transcript variant X1	NC_036780.1	12885000	13102277	TF343455	C10orf112	chromosome 10 open reading frame 112 [Source:HGNC Symbol;Acc:24331]	MAM domain containing glycosylphosphatidylinositol anchor 2 [Source:HGNC Symbol;Acc:19835]
LOC101486355	LOC101486355	uncharacterized LOC101486355	NC_036780.1	13337798	13346519	TF352328	NA	NA	interleukin 4 receptor [Source:ZFIN;Acc:ZDB-GENE-050227-5]
LOC101484443	LOC101484443	zinc finger protein 418%2C transcript variant X1	NC_036780.1	13384865	13391773	TF333488	HIC2	hypermethylated in cancer 2 [Source:HGNC Symbol;Acc:18595]	hypermethylated in cancer 1 like [Source:ZFIN;Acc:ZDB-GENE-030620-1]
LOC101482469	spata17	spermatogenesis associated 17%2C transcript variant X2	NC_036780.1	13499902	13540624	TF329213	SPATA17	spermatogenesis associated 17 [Source:HGNC Symbol;Acc:25184]	spermatogenesis associated 17 [Source:ZFIN;Acc:ZDB-GENE-111214-1]
LOC101481777	LOC101481777	estrogen-related receptor gamma%2C transcript variant X8	NC_036780.1	13635921	13805605	TF323751	ESRRG	estrogen-related receptor gamma [Source:HGNC Symbol;Acc:3474]	estrogen-related receptor gamma a [Source:ZFIN;Acc:ZDB-GENE-030821-2]
LOC101479845	LOC101479845	frizzled-3%2C transcript variant X1	NC_036780.1	14072825	14106669	TF317907	FZD3	frizzled family receptor 3 [Source:HGNC Symbol;Acc:4041]	frizzled homolog 3b [Source:ZFIN;Acc:ZDB-GENE-070122-1]
LOC101478432	kif26b	kinesin family member 26B%2C transcript variant X1	NC_036780.1	14153737	14253944	TF105235	KIF26B	kinesin family member 26B [Source:HGNC Symbol;Acc:25484]	kinesin family member 26B [Source:HGNC Symbol;Acc:25484]
LOC101478151	smyd3	SET and MYND domain containing 3	NC_036780.1	14256541	14361583	TF106487	SMYD3	SET and MYND domain containing 3 [Source:HGNC Symbol;Acc:15513]	SET and MYND domain containing 3 [Source:ZFIN;Acc:ZDB-GENE-051120-138]
LOC101473068	galnt2	polypeptide N-acetylgalactosaminyltransferase 2	NC_036780.1	14630844	14694683	TF313267	GALNT2	UDP-N-acetyl-alpha-D-galactosamine:polypeptide N-acetylgalactosaminyltransferase 2 (GalNAc-T2) [Source:HGNC Symbol;Acc:4124]	UDP-N-acetyl-alpha-D-galactosamine:polypeptide N-acetylgalactosaminyltransferase 2 [Source:ZFIN;Acc:ZDB-GENE-041111-110]
LOC112435233	LOC112435233	zinc finger CCHC domain-containing protein 18-like	NC_036780.1	14877760	14880951	TF335054	PNMA1	paraneoplastic Ma antigen 1 [Source:HGNC Symbol;Acc:9158]	NA
LOC101468129	LOC101468129	uncharacterized LOC101468129%2C transcript variant X1	NC_036780.1	14949609	14960090	TF343847	NA	NA	Uncharacterized protein [Source:UniProtKB/TrEMBL;Acc:F1QLL4]
LOC101467627	pbld	phenazine biosynthesis like protein domain containing%2C transcript variant X1	NC_036780.1	14993182	15001124	TF314596	PBLD	phenazine biosynthesis-like protein domain containing [Source:HGNC Symbol;Acc:23301]	phenazine biosynthesis-like protein domain containing [Source:HGNC Symbol;Acc:23301]
LOC101487496	csmd1	CUB and Sushi multiple domains 1	NC_036780.1	15391941	15756287	TF316872	CSMD1	CUB and Sushi multiple domains 1 [Source:HGNC Symbol;Acc:14026]	CUB and Sushi multiple domains 1 [Source:HGNC Symbol;Acc:14026]
LOC101487203	LOC101487203	myomesin-2	NC_036780.1	15800267	15829403	TF331825	MYOM2	myomesin 2 [Source:HGNC Symbol;Acc:7614]	Uncharacterized protein [Source:UniProtKB/TrEMBL;Acc:E7EYE1]
LOC101483897	pax6	paired box 6%2C transcript variant X6	NC_036780.1	15971796	15993356	TF320146	PAX6	paired box 6 [Source:HGNC Symbol;Acc:8620]	paired box gene 6b [Source:ZFIN;Acc:ZDB-GENE-001031-1]
LOC101481098	cstf3	cleavage stimulation factor subunit 3	NC_036780.1	16083061	16093770	TF105867	CSTF3	cleavage stimulation factor, 3' pre-RNA, subunit 3, 77kDa [Source:HGNC Symbol;Acc:2485]	cleavage stimulation factor, 3' pre-RNA, subunit 3 [Source:ZFIN;Acc:ZDB-GENE-040426-1997]
LOC101480609	hipk3	homeodomain interacting protein kinase 3%2C transcript variant X1	NC_036780.1	16095703	16144161	TF105417	HIPK3	homeodomain interacting protein kinase 3 [Source:HGNC Symbol;Acc:4915]	homeodomain interacting protein kinase 3b [Source:ZFIN;Acc:ZDB-GENE-030131-82]
LOC101480134	kiaa1549l	KIAA1549 like%2C transcript variant X2	NC_036780.1	16145461	16215629	TF332690	KIAA1549L	KIAA1549-like [Source:HGNC Symbol;Acc:24836]	KIAA1549-like b [Source:ZFIN;Acc:ZDB-GENE-050419-18]
LOC101479844	spon1	spondin 1	NC_036780.1	16271843	16327211	TF313353	NA	NA	spondin 1a [Source:ZFIN;Acc:ZDB-GENE-000427-9]
LOC106674463	LOC106674463	putative nuclease HARBI1	NC_036780.1	16337088	16338445	TF327972	HARBI1	harbinger transposase derived 1 [Source:HGNC Symbol;Acc:26522]	Uncharacterized protein [Source:UniProtKB/TrEMBL;Acc:F1QYX7]
LOC101477682	LOC101477682	transcription factor Maf	NC_036780.1	16480844	16549089	TF325689	MAF	v-maf musculoaponeurotic fibrosarcoma oncogene homolog (avian) [Source:HGNC Symbol;Acc:6776]	v-maf musculoaponeurotic fibrosarcoma oncogene homolog (avian) [Source:HGNC Symbol;Acc:6776]
LOC101477406	cdyl2	chromodomain Y like 2	NC_036780.1	16784385	16832040	TF313375	CDYL2	chromodomain protein, Y-like 2 [Source:HGNC Symbol;Acc:23030]	chromodomain protein, Y-like [Source:ZFIN;Acc:ZDB-GENE-070912-561]
LOC101474243	gse1	Gse1 coiled-coil protein%2C transcript variant X1	NC_036780.1	16878089	17046586	TF332496	GSE1	Gse1 coiled-coil protein [Source:HGNC Symbol;Acc:28979]	Gse1 coiled-coil protein [Source:ZFIN;Acc:ZDB-GENE-030131-9569]
LOC101473363	LOC101473363	dual specificity protein phosphatase 22-A	NC_036780.1	17062561	17079245	TF105126	DUSP22	dual specificity phosphatase 22 [Source:HGNC Symbol;Acc:16077]	dual specificity phosphatase 22a [Source:ZFIN;Acc:ZDB-GENE-040718-219]
LOC101473067	irf8	interferon regulatory factor 8	NC_036780.1	17080682	17084644	TF328512	IRF8	interferon regulatory factor 8 [Source:HGNC Symbol;Acc:5358]	interferon regulatory factor 8 [Source:ZFIN;Acc:ZDB-GENE-040718-367]
LOC101471214	def8	differentially expressed in FDCP 8 homolog	NC_036780.1	17227751	17242316	TF317067	DEF8	differentially expressed in FDCP 8 homolog (mouse) [Source:HGNC Symbol;Acc:25969]	pleckstrin homology domain containing, family M (with RUN domain) member 1 [Source:ZFIN;Acc:ZDB-GENE-030131-2752]
LOC101470947	mc1r	melanocortin 1 receptor	NC_036780.1	17247869	17250672	TF332646	MC1R	melanocortin 1 receptor (alpha melanocyte stimulating hormone receptor) [Source:HGNC Symbol;Acc:6929]	melanocortin 1 receptor [Source:ZFIN;Acc:ZDB-GENE-030502-1]
LOC101470452	tcf25	transcription factor 25	NC_036780.1	17253685	17271971	TF106155	TCF25	transcription factor 25 (basic helix-loop-helix) [Source:HGNC Symbol;Acc:29181]	transcription factor 25 (basic helix-loop-helix) [Source:ZFIN;Acc:ZDB-GENE-040905-2]
LOC101468235	LOC101468235	fibulin-7%2C transcript variant X1	NC_036780.1	17372468	17378502	TF330076	FBLN7	fibulin 7 [Source:HGNC Symbol;Acc:26740]	Uncharacterized protein [Source:UniProtKB/TrEMBL;Acc:F1Q7H4]
LOC101482079	LOC101482079	neuritin-like protein	NC_036780.1	17584750	17590327	TF332589	NRN1L	neuritin 1-like [Source:HGNC Symbol;Acc:29811]	neuritin 1-like b [Source:ZFIN;Acc:ZDB-GENE-081022-27]
LOC101485135	LOC101485135	mucin-5AC%2C transcript variant X1	NC_036780.1	17680170	17684827	TF316381	LRRC16B	leucine rich repeat containing 16B [Source:HGNC Symbol;Acc:20272]	leucine rich repeat containing 16B [Source:HGNC Symbol;Acc:20272]
LOC101484836	LOC101484836	transcriptional repressor CTCF	NC_036780.1	17688588	17695701	TF106430	CTCF	CCCTC-binding factor (zinc finger protein) [Source:HGNC Symbol;Acc:13723]	CCCTC-binding factor (zinc finger protein) [Source:ZFIN;Acc:ZDB-GENE-040624-5]
LOC101463882	rfx7	regulatory factor X7	NC_036780.1	17867310	17900225	TF321340	RFX7	regulatory factor X, 7 [Source:HGNC Symbol;Acc:25777]	Uncharacterized protein [Source:UniProtKB/TrEMBL;Acc:E7F1P9]
LOC101465421	tcf12	transcription factor 12%2C transcript variant X1	NC_036780.1	17951960	18037065	TF321672	TCF12	transcription factor 12 [Source:HGNC Symbol;Acc:11623]	transcription factor 12 [Source:ZFIN;Acc:ZDB-GENE-040516-11]
LOC101467043	aldh1a2	aldehyde dehydrogenase 1 family member A2	NC_036780.1	18147174	18176177	TF300455	ALDH1A2	aldehyde dehydrogenase 1 family, member A2 [Source:HGNC Symbol;Acc:15472]	aldehyde dehydrogenase 1 family, member A2 [Source:ZFIN;Acc:ZDB-GENE-011010-3]
LOC101472987	ap1g1	adaptor related protein complex 1 gamma 1 subunit%2C transcript variant X1	NC_036780.1	18443562	18469271	TF300367	AP1G1	adaptor-related protein complex 1, gamma 1 subunit [Source:HGNC Symbol;Acc:555]	adaptor-related protein complex 1, gamma 1 subunit [Source:ZFIN;Acc:ZDB-GENE-030131-3187]
LOC101474910	crispld2	cysteine rich secretory protein LCCL domain containing 2%2C transcript variant X2	NC_036780.1	18566638	18581883	TF316148	CRISPLD2	cysteine-rich secretory protein LCCL domain containing 2 [Source:HGNC Symbol;Acc:25248]	cysteine-rich secretory protein LCCL domain containing 2 [Source:HGNC Symbol;Acc:25248]
LOC101475902	LOC101475902	uncharacterized LOC101475902	NC_036780.1	18612521	18614364	NA	NA	NA	NA
LOC101476085	zfhx3	zinc finger homeobox 3%2C transcript variant X1	NC_036780.1	18795741	18944211	TF323288	ZFHX3	zinc finger homeobox 3 [Source:HGNC Symbol;Acc:777]	Uncharacterized protein [Source:UniProtKB/TrEMBL;Acc:E7F0P4]
LOC111501373	LOC111501373		NC_036780.1	19021825	19021924	NA	NA	NA	NA
LOC101476772	LOC101476772	uncharacterized LOC101476772	NC_036780.1	19086221	19101741	NA	NA	NA	NA
LOC101479015	rpl13	ribosomal protein L13	NC_036780.1	19228192	19233243	TF300073	RPL13	ribosomal protein L13 [Source:HGNC Symbol;Acc:10303]	ribosomal protein L13 [Source:ZFIN;Acc:ZDB-GENE-031007-1]
LOC101480445	LOC101480445	nuclear factor of activated T-cells 5%2C transcript variant X6	NC_036780.1	19263784	19302848	TF326480	NFAT5	nuclear factor of activated T-cells 5, tonicity-responsive [Source:HGNC Symbol;Acc:7774]	nuclear factor of activated T-cells 5, tonicity-responsive [Source:HGNC Symbol;Acc:7774]
LOC101481211	vat1l	vesicle amine transport 1 like	NC_036780.1	19357180	19368795	TF314255	VAT1L	vesicle amine transport protein 1 homolog (T. californica)-like [Source:HGNC Symbol;Acc:29315]	vesicle amine transport protein 1 homolog (T. californica)-like [Source:ZFIN;Acc:ZDB-GENE-080204-21]
LOC101482484	mical2	microtubule associated monooxygenase%2C calponin and LIM domain containing 2%2C transcript variant X5	NC_036780.1	19414771	19474317	TF324129	MICAL2	microtubule associated monoxygenase, calponin and LIM domain containing 2 [Source:HGNC Symbol;Acc:24693]	microtubule associated monoxygenase, calponin and LIM domain containing 2 [Source:HGNC Symbol;Acc:24693]
LOC101480155	pth	parathyroid hormone	NC_036780.1	19565092	19568751	TF336197	PTH	parathyroid hormone [Source:HGNC Symbol;Acc:9606]	parathyroid hormone 1b [Source:ZFIN;Acc:ZDB-GENE-040623-2]	None	NANoHomolog
LOC101485232	galnt18	polypeptide N-acetylgalactosaminyltransferase 18%2C transcript variant X1	NC_036780.1	19675968	19773083	TF352661	GALNT8	UDP-N-acetyl-alpha-D-galactosamine:polypeptide N-acetylgalactosaminyltransferase 8 (GalNAc-T8) [Source:HGNC Symbol;Acc:4130]	UDP-N-acetyl-alpha-D-galactosamine:polypeptide N-acetylgalactosaminyltransferase 8 (GalNAc-T8) [Source:HGNC Symbol;Acc:4130]
LOC101487516	sbf2	SET binding factor 2%2C transcript variant X1	NC_036780.1	19901863	20010008	TF318583	SBF2	SET binding factor 2 [Source:HGNC Symbol;Acc:2135]	SET binding factor 2 [Source:ZFIN;Acc:ZDB-GENE-030911-10]
LOC101464756	dennd5a	DENN domain containing 5A%2C transcript variant X1	NC_036780.1	20063933	20098058	TF313237	DENND5A	DENN/MADD domain containing 5A [Source:HGNC Symbol;Acc:19344]	DENN/MADD domain containing 5A [Source:ZFIN;Acc:ZDB-GENE-071211-1]
LOC101463988	scube2	signal peptide%2C CUB domain and EGF like domain containing 2%2C transcript variant X1	NC_036780.1	20105356	20124673	TF351672	SCUBE2	signal peptide, CUB domain, EGF-like 2 [Source:HGNC Symbol;Acc:30425]	signal peptide, CUB domain, EGF-like 2 [Source:ZFIN;Acc:ZDB-GENE-050302-80]
LOC111501376	trnag-ccc	tRNA-Gly	NC_036780.1	20213875	20213945	NA	NA	NA	NA
LOC101467239	stk33	serine/threonine kinase 33%2C transcript variant X2	NC_036780.1	20218490	20233530	TF314166	STK33	serine/threonine kinase 33 [Source:HGNC Symbol;Acc:14568]	serine/threonine kinase 33 [Source:ZFIN;Acc:ZDB-GENE-040724-242]
LOC101467957	LOC101467957	rhombotin-1	NC_036780.1	20373723	20398341	TF351071	LMO1	LIM domain only 1 (rhombotin 1) [Source:HGNC Symbol;Acc:6641]	LIM domain only 1 [Source:ZFIN;Acc:ZDB-GENE-021115-6]
LOC112435283	LOC112435283	G2/M phase-specific E3 ubiquitin-protein ligase-like%2C transcript variant X1	NC_036780.1	20417766	20420498	TF334665	NA	NA	zgc:112970 [Source:ZFIN;Acc:ZDB-GENE-050327-83]
LOC101468266	tub	tubby bipartite transcription factor%2C transcript variant X3	NC_036780.1	20454596	20518141	TF314076	TUB	tubby homolog (mouse) [Source:HGNC Symbol;Acc:12406]	Uncharacterized protein [Source:UniProtKB/TrEMBL;Acc:E7F015]
LOC101469697	pde3b	phosphodiesterase 3B%2C transcript variant X1	NC_036780.1	20563785	20611491	TF329631	PDE3B	phosphodiesterase 3B, cGMP-inhibited [Source:HGNC Symbol;Acc:8779]	Uncharacterized protein [Source:UniProtKB/TrEMBL;Acc:E7F5P1]
LOC101470959	LOC101470959	transcription factor SOX-6%2C transcript variant X1	NC_036780.1	20738460	20870258	TF320471	SOX6	SRY (sex determining region Y)-box 6 [Source:HGNC Symbol;Acc:16421]	SRY-box containing gene 6 [Source:ZFIN;Acc:ZDB-GENE-081120-6]
LOC101472291	LOC101472291	caprin-1%2C transcript variant X2	NC_036780.1	20966361	20980404	TF329471	CAPRIN1	cell cycle associated protein 1 [Source:HGNC Symbol;Acc:6743]	cell cycle associated protein 1a [Source:ZFIN;Acc:ZDB-GENE-040801-226]
LOC101473582	ext2	exostosin glycosyltransferase 2	NC_036780.1	21028869	21048449	TF314231	EXT2	exostosin 2 [Source:HGNC Symbol;Acc:3513]	exostoses (multiple) 2 [Source:ZFIN;Acc:ZDB-GENE-041124-3]
LOC101474074	dagla	diacylglycerol lipase alpha%2C transcript variant X1	NC_036780.1	21055006	21099392	TF312928	DAGLA	diacylglycerol lipase, alpha [Source:HGNC Symbol;Acc:1165]	Uncharacterized protein [Source:UniProtKB/TrEMBL;Acc:E7F0B3]
LOC101483251	slc39a13	solute carrier family 39 member 13%2C transcript variant X1	NC_036780.1	21616620	21636412	TF318470	SLC39A13	solute carrier family 39 (zinc transporter), member 13 [Source:HGNC Symbol;Acc:20859]	solute carrier family 39 (zinc transporter), member 13 [Source:ZFIN;Acc:ZDB-GENE-030616-17]
LOC101482485	LOC101482485	vesicular glutamate transporter 2.1	NC_036780.1	21694920	21712050	TF313535	SLC17A7	solute carrier family 17 (sodium-dependent inorganic phosphate cotransporter), member 7 [Source:HGNC Symbol;Acc:16704]	solute carrier family 17 (sodium-dependent inorganic phosphate cotransporter), member 6b [Source:ZFIN;Acc:ZDB-GENE-030616-554]
LOC101481706	igdcc3	immunoglobulin superfamily DCC subclass member 3	NC_036780.1	21753649	21822283	TF321506	IGDCC3	immunoglobulin superfamily, DCC subclass, member 3 [Source:HGNC Symbol;Acc:9700]	immunoglobulin superfamily, DCC subclass, member 3 [Source:ZFIN;Acc:ZDB-GENE-080303-24]
LOC101479293	LOC101479293	protein FAM189A1	NC_036780.1	21952855	22016368	TF332736	FAM189A1	family with sequence similarity 189, member A1 [Source:HGNC Symbol;Acc:29075]	family with sequence similarity 189, member A2 [Source:ZFIN;Acc:ZDB-GENE-050309-90]
LOC101466498	LOC101466498	haptoglobin-like	NC_036780.1	22131330	22137329	TF334326	HP	haptoglobin [Source:HGNC Symbol;Acc:5141]	haptoglobin [Source:ZFIN;Acc:ZDB-GENE-030131-1259]
LOC101467653	ankrd11	ankyrin repeat domain 11%2C transcript variant X1	NC_036780.1	22200585	22314284	TF326440	ANKRD11	ankyrin repeat domain 11 [Source:HGNC Symbol;Acc:21316]	ankyrin repeat domain 11 [Source:HGNC Symbol;Acc:21316]
LOC101468756	cbfa2t3	CBFA2/RUNX1 translocation partner 3%2C transcript variant X1	NC_036780.1	22496717	22544146	TF106303	CBFA2T3	core-binding factor, runt domain, alpha subunit 2; translocated to, 3 [Source:HGNC Symbol;Acc:1537]	Uncharacterized protein [Source:UniProtKB/TrEMBL;Acc:F1QTJ1]
LOC101471725	galns	galactosamine (N-acetyl)-6-sulfatase	NC_036780.1	22553919	22577208	TF314186	GALNS	galactosamine (N-acetyl)-6-sulfate sulfatase [Source:HGNC Symbol;Acc:4122]	galactosamine (N-acetyl)-6-sulfate sulfatase [Source:ZFIN;Acc:ZDB-GENE-070112-1152]
LOC101474266	cdh16	cadherin 16	NC_036780.1	22700418	22727506	TF316817	CDH16	cadherin 16, KSP-cadherin [Source:HGNC Symbol;Acc:1755]	cadherin 16, KSP-cadherin [Source:HGNC Symbol;Acc:1755]
LOC101475608	LOC101475608	ephrin type-A receptor 6%2C transcript variant X1	NC_036780.1	22780063	22858021	TF315608	EPHA5	EPH receptor A5 [Source:HGNC Symbol;Acc:3389]	eph receptor A6 [Source:ZFIN;Acc:ZDB-GENE-090311-43]
LOC101483627	LOC101483627	LIM domain only protein 7%2C transcript variant X3	NC_036780.1	22984423	23017097	TF332155	LMO7	LIM domain 7 [Source:HGNC Symbol;Acc:6646]	LIM domain only 7a [Source:ZFIN;Acc:ZDB-GENE-030219-74]
LOC101477426	LOC101477426	glypican-6%2C transcript variant X1	NC_036780.1	23134347	23290375	TF105317	GPC6	glypican 6 [Source:HGNC Symbol;Acc:4454]	glypican 6 [Source:HGNC Symbol;Acc:4454]
LOC101478083	LOC101478083	glypican-5	NC_036780.1	23305923	23422394	TF105317	GPC5	glypican 5 [Source:HGNC Symbol;Acc:4453]	glypican 3 [Source:ZFIN;Acc:ZDB-GENE-031212-1]
LOC101481601	rasa3	RAS p21 protein activator 3%2C transcript variant X1	NC_036780.1	23479267	23519261	TF105302	RASA3	RAS p21 protein activator 3 [Source:HGNC Symbol;Acc:20331]	RAS p21 protein activator 3 [Source:ZFIN;Acc:ZDB-GENE-090313-21]
LOC101482376	gas6	growth arrest specific 6	NC_036780.1	23540433	23558906	TF352157	GAS6	growth arrest-specific 6 [Source:HGNC Symbol;Acc:4168]	growth arrest-specific 6 [Source:ZFIN;Acc:ZDB-GENE-030131-7773]
LOC101483738	LOC101483738	transmembrane and coiled-coil domain-containing protein 3%2C transcript variant X3	NC_036780.1	23610863	23624258	TF329364	TMCO3	transmembrane and coiled-coil domains 3 [Source:HGNC Symbol;Acc:20329]	transmembrane and coiled-coil domains 3 [Source:ZFIN;Acc:ZDB-GENE-071030-1]
LOC101483252	LOC101483252	DCN1-like protein 2%2C transcript variant X1	NC_036780.1	23624334	23630953	TF313332	DCUN1D2	DCN1, defective in cullin neddylation 1, domain containing 2 (S. cerevisiae) [Source:HGNC Symbol;Acc:20328]	DCN1, defective in cullin neddylation 1, domain containing 2 (S. cerevisiae) [Source:ZFIN;Acc:ZDB-GENE-040625-171]
LOC101486563	LOC101486563	F-box/LRR-repeat protein 3%2C transcript variant X2	NC_036780.1	23688046	23699014	TF352583	FBXL3	F-box and leucine-rich repeat protein 3 [Source:HGNC Symbol;Acc:13599]	F-box and leucine-rich repeat protein 3 [Source:HGNC Symbol;Acc:13599]
LOC101484465	nkpd1	NTPase KAP family P-loop domain containing 1	NC_036780.1	23713186	23720086	TF344032	NKPD1	NTPase, KAP family P-loop domain containing 1 [Source:HGNC Symbol;Acc:24739]	Uncharacterized protein [Source:UniProtKB/TrEMBL;Acc:E7F0N5]
LOC101487315	pcdh17	protocadherin 17%2C transcript variant X1	NC_036780.1	24084671	24153993	TF352008	PCDH17	protocadherin 17 [Source:HGNC Symbol;Acc:14267]	protocadherin 17 [Source:ZFIN;Acc:ZDB-GENE-090608-3]
LOC112435309	LOC112435309	histone H1-like	NC_036780.1	24371941	24372684	TF313664	HIST1H1E	histone cluster 1, H1e [Source:HGNC Symbol;Acc:4718]	zgc:110425 [Source:ZFIN;Acc:ZDB-GENE-050522-103]
LOC101487988	LOC101487988	protein diaphanous homolog 3%2C transcript variant X1	NC_036780.1	24442687	24606675	TF315383	DIAPH3	diaphanous homolog 3 (Drosophila) [Source:HGNC Symbol;Acc:15480]	diaphanous homolog 3 (Drosophila) [Source:ZFIN;Acc:ZDB-GENE-040801-144]
LOC101464186	pcdh20	protocadherin 20	NC_036780.1	24654323	24658426	TF320624	PCDH20	protocadherin 20 [Source:HGNC Symbol;Acc:14257]	Uncharacterized protein [Source:UniProtKB/TrEMBL;Acc:E7F9B5]
LOC101464462	pcdh9	protocadherin 9%2C transcript variant X1	NC_036780.1	25079222	25282263	TF320624	PCDH9	protocadherin 9 [Source:HGNC Symbol;Acc:8661]	protocadherin 9 [Source:HGNC Symbol;Acc:8661]
LOC112434874	LOC112434874	uncharacterized LOC112434874	NC_036780.1	25389729	25392961	NA	NA	NA	NA
LOC101465133	pou4f1	POU class 4 homeobox 1	NC_036780.1	25439221	25442235	TF316413	POU4F1	POU class 4 homeobox 1 [Source:HGNC Symbol;Acc:9218]	POU domain, class 4, transcription factor 1 [Source:ZFIN;Acc:ZDB-GENE-000523-2]
LOC101465909	LOC101465909	uncharacterized LOC101465909	NC_036780.1	25477675	25486133	NA	NA	NA	NA
LOC101467240	gtf2f2	general transcription factor IIF subunit 2%2C transcript variant X1	NC_036780.1	25538215	25551597	TF314290	GTF2F2	general transcription factor IIF, polypeptide 2, 30kDa [Source:HGNC Symbol;Acc:4653]	general transcription factor IIF, polypeptide 2a [Source:ZFIN;Acc:ZDB-GENE-040625-131]
LOC101467960	LOC101467960	uncharacterized LOC101467960%2C transcript variant X1	NC_036780.1	25552509	25554262	NA	NA	NA	NA
LOC111501374	LOC111501374	small nucleolar RNA SNORA31	NC_036780.1	25553011	25553144	NA	NA	NA	NA
LOC101468151	LOC101468151	protein TANC1	NC_036780.1	25554765	25601850	TF323159	TANC1	tetratricopeptide repeat, ankyrin repeat and coiled-coil containing 1 [Source:HGNC Symbol;Acc:29364]	tetratricopeptide repeat, ankyrin repeat and coiled-coil containing 1 [Source:HGNC Symbol;Acc:29364]
LOC101468925	baz2b	bromodomain adjacent to zinc finger domain 2B%2C transcript variant X1	NC_036780.1	25632885	25700950	TF329083	BAZ2B	bromodomain adjacent to zinc finger domain, 2B [Source:HGNC Symbol;Acc:963]	bromodomain adjacent to zinc finger domain, 2B [Source:HGNC Symbol;Acc:963]
LOC101470668	LOC101470668	lymphocyte antigen 75	NC_036780.1	25725367	25754744	TF316663	LY75-CD302	LY75-CD302 readthrough [Source:HGNC Symbol;Acc:38828]	lymphocyte antigen 75 [Source:ZFIN;Acc:ZDB-GENE-050309-166]
LOC101476087	LOC101476087	interleukin-1 receptor accessory protein%2C transcript variant X1	NC_036780.1	25974245	25982466	TF325519	IL18R1	interleukin 18 receptor 1 [Source:HGNC Symbol;Acc:5988]	single immunoglobulin and toll-interleukin 1 receptor (TIR) domain [Source:ZFIN;Acc:ZDB-GENE-080303-3]
LOC101477704	LOC101477704	coiled-coil domain-containing protein 42 homolog%2C transcript variant X1	NC_036780.1	26100473	26103823	TF327270	CCDC42	coiled-coil domain containing 42 [Source:HGNC Symbol;Acc:26528]	coiled-coil domain containing 42B [Source:ZFIN;Acc:ZDB-GENE-060526-194]
LOC101481892	LOC101481892	polycomb protein SCMH1%2C transcript variant X3	NC_036780.1	26314155	26341075	TF106488	SCML2	sex comb on midleg-like 2 (Drosophila) [Source:HGNC Symbol;Acc:10581]	sex comb on midleg-like 2 (Drosophila) [Source:HGNC Symbol;Acc:10581]
LOC101463592	pde8a	phosphodiesterase 8A	NC_036780.1	26548280	26601151	TF314638	PDE8A	phosphodiesterase 8A [Source:HGNC Symbol;Acc:8793]	phosphodiesterase 8A [Source:ZFIN;Acc:ZDB-GENE-070112-622]
LOC101469436	dmxl2	Dmx like 2%2C transcript variant X1	NC_036780.1	26902468	26943886	TF312896	DMXL2	Dmx-like 2 [Source:HGNC Symbol;Acc:2938]	Dmx-like 2 [Source:HGNC Symbol;Acc:2938]
LOC101473881	fbn1	fibrillin 1	NC_036780.1	27050958	27116287	TF316849	FBN1	fibrillin 1 [Source:HGNC Symbol;Acc:3603]	fibrillin 1 [Source:HGNC Symbol;Acc:3603]
LOC101470471	sema6d	semaphorin 6D%2C transcript variant X2	NC_036780.1	27198045	27218772	TF316102	SEMA6D	sema domain, transmembrane domain (TM), and cytoplasmic domain, (semaphorin) 6D [Source:HGNC Symbol;Acc:16770]	sema domain, transmembrane domain (TM), and cytoplasmic domain, (semaphorin) 6D, like [Source:ZFIN;Acc:ZDB-GENE-050417-171]
LOC112435188	LOC112435188		NC_036780.1	27341370	27345232	NA	NA	NA	NA
LOC101474172	shc4	SHC adaptor protein 4%2C transcript variant X1	NC_036780.1	27393380	27408388	TF315807	SHC4	SHC (Src homology 2 domain containing) family, member 4 [Source:HGNC Symbol;Acc:16743]	SHC (Src homology 2 domain containing) transforming protein 1 [Source:HGNC Symbol;Acc:10840]
LOC101475306	cops2	COP9 signalosome subunit 2	NC_036780.1	27428074	27435808	TF105738	COPS2	COP9 constitutive photomorphogenic homolog subunit 2 (Arabidopsis) [Source:HGNC Symbol;Acc:30747]	COP9 constitutive photomorphogenic homolog subunit 2 (Arabidopsis) [Source:ZFIN;Acc:ZDB-GENE-040625-15]
LOC101475610	fgf7	fibroblast growth factor 7%2C transcript variant X1	NC_036780.1	27488641	27494603	TF317805	FGF7	fibroblast growth factor 7 [Source:HGNC Symbol;Acc:3685]	fibroblast growth factor 7 [Source:ZFIN;Acc:ZDB-GENE-080122-1]
LOC101482338	LOC101482338	hyaluronan and proteoglycan link protein 3	NC_036780.1	27629361	27634063	TF332134	HAPLN3	hyaluronan and proteoglycan link protein 3 [Source:HGNC Symbol;Acc:21446]	hyaluronan and proteoglycan link protein 3 [Source:ZFIN;Acc:ZDB-GENE-040426-2089]
LOC101487673	LOC101487673	E3 SUMO-protein ligase PIAS1%2C transcript variant X1	NC_036780.1	27929946	27999800	TF323787	PIAS1	protein inhibitor of activated STAT, 1 [Source:HGNC Symbol;Acc:2752]	Uncharacterized protein [Source:UniProtKB/TrEMBL;Acc:F1QWH6]
LOC101464424	uaca	uveal autoantigen with coiled-coil domains and ankyrin repeats	NC_036780.1	28034686	28077157	TF331274	UACA	uveal autoantigen with coiled-coil domains and ankyrin repeats [Source:HGNC Symbol;Acc:15947]	uveal autoantigen with coiled-coil domains and ankyrin repeats [Source:HGNC Symbol;Acc:15947]
LOC112435312	LOC112435312	serine/threonine-protein kinase pim-2-like	NC_036780.1	28319578	28322740	TF320810	PIM3	pim-3 oncogene [Source:HGNC Symbol;Acc:19310]	si:dkeyp-104h9.7 [Source:ZFIN;Acc:ZDB-GENE-081104-450]
LOC101481717	LOC101481717	serine/threonine-protein kinase pim-2	NC_036780.1	28327207	28330016	TF320810	PIM3	pim-3 oncogene [Source:HGNC Symbol;Acc:19310]	si:dkeyp-104h9.7 [Source:ZFIN;Acc:ZDB-GENE-081104-450]
LOC101467914	kif23	kinesin family member 23%2C transcript variant X1	NC_036780.1	28413672	28425858	TF105232	KIF23	kinesin family member 23 [Source:HGNC Symbol;Acc:6392]	kinesin family member 23 [Source:ZFIN;Acc:ZDB-GENE-991019-4]
LOC101468415	glce	glucuronic acid epimerase	NC_036780.1	28451247	28512898	TF105869	GLCE	glucuronic acid epimerase [Source:HGNC Symbol;Acc:17855]	glucuronyl C5-epimerase b [Source:ZFIN;Acc:ZDB-GENE-040630-8]
LOC105941059	LOC105941059	uncharacterized LOC105941059	NC_036780.1	28797562	28799060	NA	NA	NA	NA
LOC101471782	trip4	thyroid hormone receptor interactor 4%2C transcript variant X2	NC_036780.1	28864485	28951831	TF314842	TRIP4	thyroid hormone receptor interactor 4 [Source:HGNC Symbol;Acc:12310]	thyroid hormone receptor interactor 4 [Source:ZFIN;Acc:ZDB-GENE-040724-92]
LOC101472461	znf609	zinc finger protein 609%2C transcript variant X2	NC_036780.1	28962731	29047055	TF329775	ZNF609	zinc finger protein 609 [Source:HGNC Symbol;Acc:29003]	zinc finger protein 609 [Source:ZFIN;Acc:ZDB-GENE-030131-5095]
LOC101472756	LOC101472756	GRAM domain-containing protein 2A%2C transcript variant X1	NC_036780.1	29047920	29074699	TF332065	GRAMD3	GRAM domain containing 3 [Source:HGNC Symbol;Acc:24911]	GRAM domain containing 2 [Source:HGNC Symbol;Acc:27287]
LOC101476342	neo1	neogenin 1%2C transcript variant X1	NC_036780.1	29276700	29436175	TF321506	NEO1	neogenin 1 [Source:HGNC Symbol;Acc:7754]	neogenin 1 [Source:ZFIN;Acc:ZDB-GENE-021031-1]
LOC101478790	csnk1g1	casein kinase 1 gamma 1%2C transcript variant X1	NC_036780.1	29454798	29494078	TF313349	CSNK1G1	casein kinase 1, gamma 1 [Source:HGNC Symbol;Acc:2454]	casein kinase 1, gamma 1 [Source:ZFIN;Acc:ZDB-GENE-041212-63]
LOC101482832	psma4	proteasome subunit alpha 4	NC_036780.1	29564053	29568604	TF106209	PSMA4	proteasome (prosome, macropain) subunit, alpha type, 4 [Source:HGNC Symbol;Acc:9533]	proteasome (prosome, macropain) subunit, alpha type, 4 [Source:ZFIN;Acc:ZDB-GENE-040426-1932]
LOC101484262	taldo1	transaldolase 1%2C transcript variant X1	NC_036780.1	29623165	29631193	TF300757	TALDO1	transaldolase 1 [Source:HGNC Symbol;Acc:11559]	transaldolase 1 [Source:ZFIN;Acc:ZDB-GENE-030131-3277]
LOC101484529	LOC101484529	tetraspanin-4	NC_036780.1	29697377	29802372	TF352892	TSPAN4	tetraspanin 4 [Source:HGNC Symbol;Acc:11859]	tetraspanin 4 [Source:HGNC Symbol;Acc:11859]
LOC101485195	ddb1	damage specific DNA binding protein 1	NC_036780.1	29869769	29915678	TF105840	DDB1	damage-specific DNA binding protein 1, 127kDa [Source:HGNC Symbol;Acc:2717]	damage specific DNA binding protein 1 [Source:ZFIN;Acc:ZDB-GENE-040426-1272]
LOC101486339	LOC101486339	CD151 antigen	NC_036780.1	29950493	29973913	TF352892	CD151	CD151 molecule (Raph blood group) [Source:HGNC Symbol;Acc:1630]	CD151 antigen, like [Source:ZFIN;Acc:ZDB-GENE-040426-1868]
LOC101467008	LOC101467008	fin bud initiation factor	NC_036780.1	30210414	30213315	TF331989	FIBIN	fin bud initiation factor homolog (zebrafish) [Source:HGNC Symbol;Acc:33747]	fin bud initiation factor b [Source:ZFIN;Acc:ZDB-GENE-050417-423]
LOC106676062	LOC106676062	retrovirus-related Pol polyprotein from transposon 412	NC_036780.1	30267474	30272386	TF330171	NA	NA	NA
LOC112435198	LOC112435198	zinc finger BED domain-containing protein 1-like	NC_036780.1	30431469	30433605	TF322818	ZBED4	zinc finger, BED-type containing 4 [Source:HGNC Symbol;Acc:20721]	Uncharacterized protein [Source:UniProtKB/TrEMBL;Acc:F1QQZ2]
LOC101473632	luzp2	leucine zipper protein 2%2C transcript variant X1	NC_036780.1	30461655	30625968	TF331644	LUZP2	leucine zipper protein 2 [Source:HGNC Symbol;Acc:23206]	leucine zipper protein 2 [Source:ZFIN;Acc:ZDB-GENE-060503-278]
LOC101467608	LOC101467608	leucine-rich repeat and immunoglobulin-like domain-containing nogo receptor-interacting protein 1-B	NC_036780.1	30662010	30681170	TF334360	LINGO1	leucine rich repeat and Ig domain containing 1 [Source:HGNC Symbol;Acc:21205]	leucine rich repeat and Ig domain containing 1b [Source:ZFIN;Acc:ZDB-GENE-040912-136]
LOC101467915	LOC101467915	potassium voltage-gated channel subfamily KQT member 1%2C transcript variant X1	NC_036780.1	30740084	30789387	TF315186	KCNQ5	potassium voltage-gated channel, KQT-like subfamily, member 5 [Source:HGNC Symbol;Acc:6299]	potassium voltage-gated channel, KQT-like subfamily, member 1 [Source:ZFIN;Acc:ZDB-GENE-061214-5]
LOC101469492	trpm5	transient receptor potential cation channel subfamily M member 5	NC_036780.1	30796575	30815199	TF314204	TRPM5	transient receptor potential cation channel, subfamily M, member 5 [Source:HGNC Symbol;Acc:14323]	transient receptor potential cation channel, subfamily M, member 5 [Source:ZFIN;Acc:ZDB-GENE-060503-736]
LOC105941060	LOC105941060	uncharacterized LOC105941060	NC_036780.1	30859173	30865323	NA	NA	NA	NA
LOC101469758	LOC101469758	very-long-chain 3-oxoacyl-CoA reductase-B	NC_036780.1	30867791	30899049	TF314591	HSD17B12	hydroxysteroid (17-beta) dehydrogenase 12 [Source:HGNC Symbol;Acc:18646]	hydroxysteroid (17-beta) dehydrogenase 12b [Source:ZFIN;Acc:ZDB-GENE-030131-1346]
LOC101470037	LOC101470037	leucine-rich repeat-containing protein 4C	NC_036780.1	31033360	31079638	TF324303	LRRC4C	leucine rich repeat containing 4C [Source:HGNC Symbol;Acc:29317]	leucine rich repeat containing 4C [Source:HGNC Symbol;Acc:29317]
LOC101470528	apip	APAF1 interacting protein	NC_036780.1	31109417	31122889	TF105632	APIP	APAF1 interacting protein [Source:HGNC Symbol;Acc:17581]	APAF1 interacting protein [Source:ZFIN;Acc:ZDB-GENE-040912-128]
LOC101470830	LOC101470830	mucin-5AC	NC_036780.1	31133744	31137200	TF334173	CD44	CD44 molecule (Indian blood group) [Source:HGNC Symbol;Acc:1681]	lymphatic vessel endothelial hyaluronic acid receptor 1b [Source:ZFIN;Acc:ZDB-GENE-030131-9516]
LOC101471102	LOC101471102	excitatory amino acid transporter 2%2C transcript variant X2	NC_036780.1	31137288	31161486	TF315206	SLC1A2	solute carrier family 1 (glial high affinity glutamate transporter), member 2 [Source:HGNC Symbol;Acc:10940]	solute carrier family 1 (glial high affinity glutamate transporter), member 2a [Source:ZFIN;Acc:ZDB-GENE-100422-11]
LOC101471398	LOC101471398	limulus clotting factor C	NC_036780.1	31164047	31182195	TF351669	PAMR1	peptidase domain containing associated with muscle regeneration 1 [Source:HGNC Symbol;Acc:24554]	peptidase domain containing associated with muscle regeneration 1 [Source:HGNC Symbol;Acc:24554]
LOC112435651	LOC112435651	uncharacterized LOC112435651	NC_036780.1	31224664	31225995	NoHit	NA	NA	NA
LOC106674839	LOC106674839	uncharacterized LOC106674839	NC_036780.1	31330737	31331606	NA	NA	NA	NA
LOC101471982	chst1	carbohydrate sulfotransferase 1	NC_036780.1	31382063	31386475	TF342871	CHST1	carbohydrate (keratan sulfate Gal-6) sulfotransferase 1 [Source:HGNC Symbol;Acc:1969]	carbohydrate (keratan sulfate Gal-6) sulfotransferase 1 [Source:ZFIN;Acc:ZDB-GENE-040801-21]
LOC112436398	LOC112436398	uncharacterized LOC112436398	NC_036780.1	31470978	31471451	NA	NA	NA	NA
LOC112435335	trnap-ugg	tRNA-Pro	NC_036780.1	31602405	31602476	NA	NA	NA	NA
LOC112435924	LOC112435924	leukocyte elastase inhibitor-like	NC_036780.1	31620911	31631210	TF352619	SERPINB10	serpin peptidase inhibitor, clade B (ovalbumin), member 10 [Source:HGNC Symbol;Acc:8942]	serpin peptidase inhibitor, clade B (ovalbumin), member 1, like 4 [Source:ZFIN;Acc:ZDB-GENE-030131-7169]
LOC101467264	lrp4	LDL receptor related protein 4%2C transcript variant X1	NC_036780.1	31780285	31891108	TF315253	LRP4	low density lipoprotein receptor-related protein 4 [Source:HGNC Symbol;Acc:6696]	low density lipoprotein receptor-related protein 1 [Source:ZFIN;Acc:ZDB-GENE-030131-7126]
LOC111501668	LOC111501668	small nucleolar RNA SNORD67	NC_036780.1	31894101	31894214	NA	NA	NA	NA
LOC101466791	nell1	neural EGFL like 1	NC_036780.1	31962526	32264865	TF323325	NELL1	NEL-like 1 (chicken) [Source:HGNC Symbol;Acc:7750]	NEL-like 2b [Source:ZFIN;Acc:ZDB-GENE-030131-8026]
LOC101466514	slc6a5	solute carrier family 6 member 5	NC_036780.1	32448548	32467040	TF343812	SLC6A5	solute carrier family 6 (neurotransmitter transporter, glycine), member 5 [Source:HGNC Symbol;Acc:11051]	solute carrier family 6 (neurotransmitter transporter, glycine), member 5 [Source:ZFIN;Acc:ZDB-GENE-050105-2]
LOC101466222	prmt3	protein arginine methyltransferase 3	NC_036780.1	32471670	32536530	TF323587	PRMT3	protein arginine methyltransferase 3 [Source:HGNC Symbol;Acc:30163]	protein arginine methyltransferase 3 [Source:ZFIN;Acc:ZDB-GENE-041105-1]	None	NANoHomolog
LOC101465940	htatip2	HIV-1 Tat interactive protein 2	NC_036780.1	32549710	32553459	TF312849	HTATIP2	HIV-1 Tat interactive protein 2, 30kDa [Source:HGNC Symbol;Acc:16637]	HIV-1 Tat interactive protein 2 [Source:ZFIN;Acc:ZDB-GENE-001219-1]
LOC101465157	dbx1	developing brain homeobox 1	NC_036780.1	32585318	32588519	TF350735	DBX1	developing brain homeobox 1 [Source:HGNC Symbol;Acc:33185]	developing brain homeobox 1b [Source:ZFIN;Acc:ZDB-GENE-000128-11]
LOC101465443	nav2	neuron navigator 2%2C transcript variant X1	NC_036780.1	32588653	32697426	TF329881	NAV2	neuron navigator 2 [Source:HGNC Symbol;Acc:15997]	Uncharacterized protein [Source:UniProtKB/TrEMBL;Acc:E7F502]
LOC101472132	e2f8	E2F transcription factor 8%2C transcript variant X1	NC_036780.1	32827404	32834463	TF105567	E2F8	E2F transcription factor 8 [Source:HGNC Symbol;Acc:24727]	E2F transcription factor 8 [Source:ZFIN;Acc:ZDB-GENE-041111-260]
LOC101473523	zdhhc13	zinc finger DHHC-type containing 13	NC_036780.1	32845887	32856632	TF317342	ZDHHC13	zinc finger, DHHC-type containing 13 [Source:HGNC Symbol;Acc:18413]	zinc finger, DHHC-type containing 13 [Source:ZFIN;Acc:ZDB-GENE-041212-79]
LOC101473818	LOC101473818	metallophosphoesterase MPPED2%2C transcript variant X1	NC_036780.1	32902793	32985192	TF314305	MPPED2	metallophosphoesterase domain containing 2 [Source:HGNC Symbol;Acc:1180]	metallophosphoesterase domain containing 2 [Source:HGNC Symbol;Acc:1180]
LOC101474301	LOC101474301	immunoglobulin superfamily containing leucine-rich repeat protein 2	NC_036780.1	33078230	33082586	TF351112	ISLR2	immunoglobulin superfamily containing leucine-rich repeat 2 [Source:HGNC Symbol;Acc:29286]	immunoglobulin superfamily containing leucine-rich repeat 2 [Source:ZFIN;Acc:ZDB-GENE-050320-95]
LOC101474681	LOC101474681	receptor for retinol uptake stra6%2C transcript variant X1	NC_036780.1	33087539	33100556	TF331851	STRA6	stimulated by retinoic acid 6 [Source:HGNC Symbol;Acc:30650]	stimulated by retinoic acid gene 6 homolog (mouse) [Source:ZFIN;Acc:ZDB-GENE-060616-252]
LOC101475152	LOC101475152	photoreceptor-specific nuclear receptor	NC_036780.1	33104604	33109655	TF315716	NR2E1	nuclear receptor subfamily 2, group E, member 1 [Source:HGNC Symbol;Acc:7973]	nuclear receptor subfamily 2, group E, member 3 [Source:ZFIN;Acc:ZDB-GENE-041114-63]
LOC105940531	LOC105940531	uncharacterized LOC105940531	NC_036780.1	33115515	33116274	NA	NA	NA	NA
LOC101475442	slc22a18	solute carrier family 22 member 18%2C transcript variant X5	NC_036780.1	33133869	33151003	TF352510	SLC22A18	solute carrier family 22, member 18 [Source:HGNC Symbol;Acc:10964]	solute carrier family 22 (organic cation transporter), member 18 [Source:ZFIN;Acc:ZDB-GENE-051120-165]
LOC112435308	LOC112435308	histone H1-like	NC_036780.1	33197594	33198403	TF313664	HIST1H1E	histone cluster 1, H1e [Source:HGNC Symbol;Acc:4718]	zgc:110425 [Source:ZFIN;Acc:ZDB-GENE-050522-103]
LOC112436301	LOC112436301	uncharacterized LOC112436301	NC_036780.1	33309917	33314834	NoHit	NA	NA	NA
LOC112435300	LOC112435300	uncharacterized LOC112435300%2C transcript variant X1	NC_036780.1	33318662	33323776	NoHit	NA	NA	NA
LOC101473804	LOC101473804	lymphocyte-specific protein 1%2C transcript variant X1	NC_036780.1	33402806	33475759	TF336257	LSP1	lymphocyte-specific protein 1 [Source:HGNC Symbol;Acc:6707]	Uncharacterized protein [Source:UniProtKB/TrEMBL;Acc:E7EZF4]
LOC101474107	LOC101474107	uncharacterized LOC101474107%2C transcript variant X1	NC_036780.1	33467171	33477885	TF337361	C11orf89	chromosome 11 open reading frame 89 [Source:HGNC Symbol;Acc:35118]	NA
LOC101473221	LOC101473221	troponin T%2C fast skeletal muscle isoforms%2C transcript variant X1	NC_036780.1	33502040	33519620	TF313321	TNNT3	troponin T type 3 (skeletal, fast) [Source:HGNC Symbol;Acc:11950]	troponin T3a, skeletal, fast [Source:ZFIN;Acc:ZDB-GENE-000322-3]
LOC101473510	LOC101473510	myoblast determination protein 1 homolog	NC_036780.1	33520718	33523156	TF316344	MYOD1	myogenic differentiation 1 [Source:HGNC Symbol;Acc:7611]	myogenic differentiation 1 [Source:ZFIN;Acc:ZDB-GENE-980526-561]
LOC101474846	otog	otogelin	NC_036780.1	33540242	33611252	TF330609	OTOGL	otogelin-like [Source:HGNC Symbol;Acc:26901]	otogelin [Source:HGNC Symbol;Acc:8516]
LOC101472539	aph1a	aph-1 homolog A%2C gamma-secretase subunit	NC_036780.1	33612882	33619142	TF314362	APH1B	anterior pharynx defective 1 homolog B (C. elegans) [Source:HGNC Symbol;Acc:24080]	anterior pharynx defective 1B [Source:ZFIN;Acc:ZDB-GENE-031118-31]
LOC101472041	LOC101472041	Golgi apparatus protein 1%2C transcript variant X1	NC_036780.1	33625014	33651354	TF106112	GLG1	golgi glycoprotein 1 [Source:HGNC Symbol;Acc:4316]	golgi glycoprotein 1b [Source:ZFIN;Acc:ZDB-GENE-060825-255]
LOC101471177	pacsin3	protein kinase C and casein kinase substrate in neurons 3%2C transcript variant X1	NC_036780.1	33656159	33689887	TF313677	PACSIN3	protein kinase C and casein kinase substrate in neurons 3 [Source:HGNC Symbol;Acc:8572]	protein kinase C and casein kinase substrate in neurons 3 [Source:ZFIN;Acc:ZDB-GENE-040426-984]
LOC101470899	ero1a	endoplasmic reticulum oxidoreductase 1 alpha	NC_036780.1	33690105	33700066	TF314471	ERO1L	ERO1-like (S. cerevisiae) [Source:HGNC Symbol;Acc:13280]	ERO1-like (S. cerevisiae) [Source:ZFIN;Acc:ZDB-GENE-040426-1312]
LOC101470213	LOC101470213	protein Smaug homolog 1%2C transcript variant X1	NC_036780.1	33704332	33787644	TF324165	SAMD4A	sterile alpha motif domain containing 4A [Source:HGNC Symbol;Acc:23023]	sterile alpha motif domain containing 4A [Source:HGNC Symbol;Acc:23023]
LOC101468289	LOC101468289	C-myc promoter-binding protein%2C transcript variant X1	NC_036780.1	33856434	33947541	TF313237	DENND4A	DENN/MADD domain containing 4A [Source:HGNC Symbol;Acc:24321]	DENN/MADD domain containing 4A [Source:ZFIN;Acc:ZDB-GENE-060503-285]
LOC101467990	LOC101467990	sodium/potassium/calcium exchanger 1	NC_036780.1	33951235	33973271	TF318759	SLC24A1	solute carrier family 24 (sodium/potassium/calcium exchanger), member 1 [Source:HGNC Symbol;Acc:10975]	solute carrier family 24 (sodium/potassium/calcium exchanger), member 1 [Source:ZFIN;Acc:ZDB-GENE-060503-191]
LOC106676916	LOC106676916	uncharacterized LOC106676916	NC_036780.1	34130885	34131229	NA	NA	NA	NA
LOC101464941	LOC101464941	high choriolytic enzyme 1-like%2C transcript variant X2	NC_036780.1	34201947	34206619	TF315280	ASTL	astacin-like metallo-endopeptidase (M12 family) [Source:HGNC Symbol;Acc:31704]	nephrosin [Source:ZFIN;Acc:ZDB-GENE-040420-2]
LOC101465231	c1qtnf4	C1q and TNF related 4	NC_036780.1	34312825	34368200	TF329591	C1QTNF4	C1q and tumor necrosis factor related protein 4 [Source:HGNC Symbol;Acc:14346]	C1q and tumor necrosis factor related protein 4 [Source:ZFIN;Acc:ZDB-GENE-050417-198]
LOC101469041	crtc3	CREB regulated transcription coactivator 3%2C transcript variant X1	NC_036780.1	34563285	34609650	TF321571	CRTC3	CREB regulated transcription coactivator 3 [Source:HGNC Symbol;Acc:26148]	Uncharacterized protein [Source:UniProtKB/TrEMBL;Acc:E7F3Z5]
LOC101470177	LOC101470177	cocaine- and amphetamine-regulated transcript protein	NC_036780.1	34733445	34735145	TF332948	CARTPT	CART prepropeptide [Source:HGNC Symbol;Acc:24323]	cocaine- and amphetamine-regulated transcript 2 [Source:ZFIN;Acc:ZDB-GENE-050417-23]
LOC101471518	map1a	microtubule associated protein 1A%2C transcript variant X1	NC_036780.1	34794079	34857958	TF350229	MAP1A	microtubule-associated protein 1A [Source:HGNC Symbol;Acc:6835]	microtubule-associated protein 1Aa [Source:ZFIN;Acc:ZDB-GENE-100426-2]
LOC101477422	LOC101477422	aggrecan core protein-like	NC_036780.1	34910812	34932644	TF332134	ACAN	aggrecan [Source:HGNC Symbol;Acc:319]	aggrecan a [Source:ZFIN;Acc:ZDB-GENE-050208-221]
LOC101473375	ctsd	cathepsin D	NC_036780.1	35105035	35111903	TF314990	CTSD	cathepsin D [Source:HGNC Symbol;Acc:2529]	cathepsin D [Source:ZFIN;Acc:ZDB-GENE-010131-8]
LOC101473958	LOC101473958	D(4) dopamine receptor	NC_036780.1	35148327	35165590	TF334382	DRD4	dopamine receptor D4 [Source:HGNC Symbol;Acc:3025]	dopamine receptor D4b [Source:ZFIN;Acc:ZDB-GENE-070508-3]
LOC101475498	znf319	zinc finger protein 319	NC_036780.1	35232489	35237290	TF332615	ZNF319	zinc finger protein 319 [Source:HGNC Symbol;Acc:13644]	zinc finger protein 319 [Source:ZFIN;Acc:ZDB-GENE-090406-2]
LOC101475794	LOC101475794	casein kinase II subunit alpha'	NC_036780.1	35238820	35259533	TF300483	CSNK2A2	casein kinase 2, alpha prime polypeptide [Source:HGNC Symbol;Acc:2459]	casein kinase 2 alpha 2a [Source:ZFIN;Acc:ZDB-GENE-990415-28]
LOC101476376	LOC101476376	nuclear receptor ROR-alpha	NC_036780.1	35482873	35535632	TF319910	RORA	RAR-related orphan receptor A [Source:HGNC Symbol;Acc:10258]	RAR-related orphan receptor A, paralog b [Source:ZFIN;Acc:ZDB-GENE-040426-855]
LOC112435298	LOC112435298	uncharacterized LOC112435298	NC_036780.1	35891955	35892597	NA	NA	NA	NA
LOC101480254	LOC101480254	LARGE xylosyl- and glucuronyltransferase 2%2C transcript variant X2	NC_036780.1	35928641	36067659	TF319168	GYLTL1B	glycosyltransferase-like 1B [Source:HGNC Symbol;Acc:16522]	glycosyltransferase-like 1b [Source:ZFIN;Acc:ZDB-GENE-050419-253]
LOC106675874	LOC106675874	uncharacterized LOC106675874	NC_036780.1	36347262	36347905	NA	NA	NA	NA
LOC101463620	LOC101463620	para-nitrobenzyl esterase	NC_036780.1	36406866	36431265	TF315470	BCHE	butyrylcholinesterase [Source:HGNC Symbol;Acc:983]	si:ch211-71n6.4 [Source:ZFIN;Acc:ZDB-GENE-091204-213]
LOC101464487	LOC101464487	serine/threonine-protein kinase BRSK2%2C transcript variant X1	NC_036780.1	36514142	36665148	TF313967	BRSK2	BR serine/threonine kinase 2 [Source:HGNC Symbol;Acc:11405]	Uncharacterized protein [Source:UniProtKB/TrEMBL;Acc:F1Q7B5]
LOC101466123	LOC101466123	ras association domain-containing protein 8%2C transcript variant X1	NC_036780.1	36683288	36692999	TF318385	RASSF7	Ras association (RalGDS/AF-6) domain family (N-terminal) member 7 [Source:HGNC Symbol;Acc:1166]	Ras association (RalGDS/AF-6) domain family (N-terminal) member 7b [Source:ZFIN;Acc:ZDB-GENE-030429-1]
LOC101468956	shank2	SH3 and multiple ankyrin repeat domains 2%2C transcript variant X1	NC_036780.1	36818187	37124024	TF324593	SHANK2	SH3 and multiple ankyrin repeat domains 2 [Source:HGNC Symbol;Acc:14295]	SH3 and multiple ankyrin repeat domains 2 [Source:HGNC Symbol;Acc:14295]
LOC101469268	LOC101469268	uncharacterized LOC101469268%2C transcript variant X1	NC_036780.1	37126781	37135022	TF330127	THAP1	THAP domain containing, apoptosis associated protein 1 [Source:HGNC Symbol;Acc:20856]	si:ch73-382f3.1 [Source:ZFIN;Acc:ZDB-GENE-030131-9513]
LOC112435314	LOC112435314	ankyrin repeat and death domain-containing protein 1A-like%2C transcript variant X1	NC_036780.1	37307370	37313991	TF333615	ANKDD1A	ankyrin repeat and death domain containing 1A [Source:HGNC Symbol;Acc:28002]	ankyrin repeat and death domain containing 1A [Source:ZFIN;Acc:ZDB-GENE-070615-8]
LOC101472612	stard5	StAR related lipid transfer domain containing 5	NC_036780.1	37375445	37389993	TF313869	STARD3	StAR-related lipid transfer (START) domain containing 3 [Source:HGNC Symbol;Acc:17579]	START domain containing 3 [Source:ZFIN;Acc:ZDB-GENE-001120-2]
LOC101480351	LOC101480351	CD82 antigen	NC_036780.1	37500870	37546922	TF352892	CD82	CD82 molecule [Source:HGNC Symbol;Acc:6210]	CD82 antigen, a [Source:ZFIN;Acc:ZDB-GENE-030131-2818]
LOC101469529	LOC101469529	death-associated protein kinase 3%2C transcript variant X3	NC_036780.1	37682854	37695786	TF314166	DAPK2	death-associated protein kinase 2 [Source:HGNC Symbol;Acc:2675]	death-associated protein kinase 2 [Source:ZFIN;Acc:ZDB-GENE-080402-8]
LOC101468455	LOC101468455	multiple epidermal growth factor-like domains protein 11%2C transcript variant X1	NC_036780.1	37732113	37995954	TF332598	MEGF11	multiple EGF-like-domains 11 [Source:HGNC Symbol;Acc:29635]	multiple EGF-like-domains 11 [Source:ZFIN;Acc:ZDB-GENE-060503-252]
LOC101480063	LOC101480063	DIS3-like exonuclease 1	NC_036780.1	37998771	38028074	TF105755	DIS3L	DIS3 mitotic control homolog (S. cerevisiae)-like [Source:HGNC Symbol;Acc:28698]	DIS3 mitotic control homolog (S. cerevisiae)-like [Source:ZFIN;Acc:ZDB-GENE-070209-95]
LOC112434662	LOC112434662	uncharacterized LOC112434662	NC_036780.1	38047691	38062843	TF333921	MATR3	matrin 3 [Source:HGNC Symbol;Acc:6912]	matrin 3-like 1.1 [Source:ZFIN;Acc:ZDB-GENE-030616-40]
LOC101474179	plekho2	pleckstrin homology domain containing O2	NC_036780.1	38117161	38132532	TF333115	PLEKHO2	pleckstrin homology domain containing, family O member 2 [Source:HGNC Symbol;Acc:30026]	pleckstrin homology domain containing, family O member 2 [Source:HGNC Symbol;Acc:30026]
LOC101481804	cemip	cell migration inducing hyaluronidase 1%2C transcript variant X2	NC_036780.1	38151247	38292084	TF316575	KIAA1199	KIAA1199 [Source:HGNC Symbol;Acc:29213]	Uncharacterized protein [Source:UniProtKB/TrEMBL;Acc:E7F291]
LOC112435289	LOC112435289	uncharacterized LOC112435289	NC_036780.1	38456000	38460448	TF334665	NA	NA	zgc:112970 [Source:ZFIN;Acc:ZDB-GENE-050327-83]
LOC101484052	LOC101484052	apoptosis regulator BAX%2C transcript variant X1	NC_036780.1	38485891	38495872	TF315834	BAX	BCL2-associated X protein [Source:HGNC Symbol;Acc:959]	zgc:153993 [Source:ZFIN;Acc:ZDB-GENE-060929-176]
LOC101484510	fgf19	fibroblast growth factor 19	NC_036780.1	38499032	38503241	TF335872	FGF19	fibroblast growth factor 19 [Source:HGNC Symbol;Acc:3675]	fibroblast growth factor 19 [Source:ZFIN;Acc:ZDB-GENE-030729-32]
LOC101486215	fgf4	fibroblast growth factor 4	NC_036780.1	38538507	38542033	TF317805	FGF4	fibroblast growth factor 4 [Source:HGNC Symbol;Acc:3682]	fibroblast growth factor 4 [Source:ZFIN;Acc:ZDB-GENE-001006-1]
LOC101484789	fgf3	fibroblast growth factor 3	NC_036780.1	38547464	38549157	TF317805	FGF3	fibroblast growth factor 3 [Source:HGNC Symbol;Acc:3681]	fibroblast growth factor 3 [Source:ZFIN;Acc:ZDB-GENE-980526-178]
LOC101485073	oraov1	oral cancer overexpressed 1	NC_036780.1	38605504	38611197	TF332075	ORAOV1	oral cancer overexpressed 1 [Source:HGNC Symbol;Acc:17589]	oral cancer overexpressed 1 [Source:ZFIN;Acc:ZDB-GENE-030729-33]
LOC101485361	ccnd1	cyclin D1	NC_036780.1	38626048	38632127	TF101004	CCND1	cyclin D1 [Source:HGNC Symbol;Acc:1582]	cyclin D1 [Source:ZFIN;Acc:ZDB-GENE-980526-176]
LOC101466199	abhd18	abhydrolase domain containing 18%2C transcript variant X2	NC_036781.1	416008	447254	TF314683	C4orf29	chromosome 4 open reading frame 29 [Source:HGNC Symbol;Acc:26111]	chromosome 4 open reading frame 29 [Source:HGNC Symbol;Acc:26111]
LOC101464754	csnk1a1	casein kinase 1 alpha 1%2C transcript variant X1	NC_036781.1	550752	580450	TF354246	CSNK1A1	casein kinase 1, alpha 1 [Source:HGNC Symbol;Acc:2451]	casein kinase 1, alpha 1 [Source:ZFIN;Acc:ZDB-GENE-020419-19]
LOC101486075	hars	histidyl-tRNA synthetase%2C transcript variant X3	NC_036781.1	793475	818073	TF300652	HARS	histidyl-tRNA synthetase [Source:HGNC Symbol;Acc:4816]	histidyl-tRNA synthetase [Source:ZFIN;Acc:ZDB-GENE-040912-152]
LOC101470768	LOC101470768	GDNF family receptor alpha-4	NC_036781.1	988499	1063476	TF331647	GFRA3	GDNF family receptor alpha 3 [Source:HGNC Symbol;Acc:4245]	GDNF family receptor alpha 3 [Source:ZFIN;Acc:ZDB-GENE-110512-1]
LOC111500871	LOC111500871	U7 small nuclear RNA	NC_036781.1	1170608	1170663	NA	NA	NA	NA
LOC112436294	LOC112436294	piggyBac transposable element-derived protein 4-like	NC_036781.1	1261513	1263144	TF328011	PGBD4	piggyBac transposable element derived 4 [Source:HGNC Symbol;Acc:19401]	Uncharacterized protein [Source:UniProtKB/TrEMBL;Acc:E7EXJ9]
LOC112435406	LOC112435406	uncharacterized LOC112435406	NC_036781.1	1279627	1287476	NA	NA	NA	NA
LOC112435403	LOC112435403	piggyBac transposable element-derived protein 4-like	NC_036781.1	1283550	1286058	TF328011	PGBD4	piggyBac transposable element derived 4 [Source:HGNC Symbol;Acc:19401]	Uncharacterized protein [Source:UniProtKB/TrEMBL;Acc:E7EXJ9]
LOC112435402	LOC112435402	piggyBac transposable element-derived protein 4-like	NC_036781.1	1293665	1296205	TF328011	PGBD4	piggyBac transposable element derived 4 [Source:HGNC Symbol;Acc:19401]	Uncharacterized protein [Source:UniProtKB/TrEMBL;Acc:E7EXJ9]
LOC112436248	LOC112436248	piggyBac transposable element-derived protein 4-like	NC_036781.1	1317686	1319041	TF328011	PGBD4	piggyBac transposable element derived 4 [Source:HGNC Symbol;Acc:19401]	Uncharacterized protein [Source:UniProtKB/TrEMBL;Acc:E7EXJ9]
LOC112436306	LOC112436306	uncharacterized LOC112436306	NC_036781.1	1569584	1574793	TF335181	SETD8	SET domain containing (lysine methyltransferase) 8 [Source:HGNC Symbol;Acc:29489]	SET domain containing (lysine methyltransferase) 8b [Source:ZFIN;Acc:ZDB-GENE-071004-17]
LOC101486977	LOC101486977	protocadherin-18%2C transcript variant X1	NC_036781.1	1637982	1647359	TF352008	PCDH18	protocadherin 18 [Source:HGNC Symbol;Acc:14268]	protocadherin 18b [Source:ZFIN;Acc:ZDB-GENE-080804-1]
LOC101487639	slc7a11	solute carrier family 7 member 11%2C transcript variant X1	NC_036781.1	1749873	1782941	TF313355	SLC7A11	solute carrier family 7 (anionic amino acid transporter light chain, xc- system), member 11 [Source:HGNC Symbol;Acc:11059]	Uncharacterized protein [Source:UniProtKB/TrEMBL;Acc:E7F3W8]
LOC112435407	LOC112435407	uncharacterized LOC112435407	NC_036781.1	2010659	2011661	NA	NA	NA	NA
LOC101472483	LOC101472483	zinc finger BED domain-containing protein 1-like	NC_036781.1	2048810	2051269	TF322818	ZBED1	zinc finger, BED-type containing 1 [Source:HGNC Symbol;Acc:447]	Uncharacterized protein [Source:UniProtKB/TrEMBL;Acc:H9GX87]
LOC112436262	LOC112436262	uncharacterized LOC112436262	NC_036781.1	2165998	2167365	NA	NA	NA	NA
LOC112436326	LOC112436326	uncharacterized LOC112436326	NC_036781.1	2421180	2425861	TF353362	NA	NA	si:dkeyp-2c8.3 [Source:ZFIN;Acc:ZDB-GENE-081031-97]
LOC101470073	LOC101470073	uncharacterized LOC101470073	NC_036781.1	2487930	2488958	NA	NA	NA	NA
LOC106674754	LOC106674754	sterile alpha motif domain-containing protein 3	NC_036781.1	2580194	2587983	TF342704	NA	NA	si:ch211-166e11.5 [Source:ZFIN;Acc:ZDB-GENE-070912-142]
LOC112436424	trnaa-ugc	tRNA-Ala	NC_036781.1	2666026	2666097	NA	NA	NA	NA
LOC101475662	trappc11	trafficking protein particle complex 11%2C transcript variant X1	NC_036781.1	2763271	2776218	TF314022	TRAPPC11	trafficking protein particle complex 11 [Source:HGNC Symbol;Acc:25751]	trafficking protein particle complex 11 [Source:ZFIN;Acc:ZDB-GENE-030131-1723]
LOC101476148	uvssa	UV stimulated scaffold protein A%2C transcript variant X1	NC_036781.1	2799309	2836991	TF321660	UVSSA	UV-stimulated scaffold protein A [Source:HGNC Symbol;Acc:29304]	UV-stimulated scaffold protein A [Source:ZFIN;Acc:ZDB-GENE-091204-111]
LOC101480300	LOC101480300	slit homolog 3 protein	NC_036781.1	3609677	3849978	TF332887	SLIT3	slit homolog 3 (Drosophila) [Source:HGNC Symbol;Acc:11087]	slit (Drosophila) homolog 3 [Source:ZFIN;Acc:ZDB-GENE-010306-4]
LOC101482142	LOC101482142	C-terminal-binding protein 1%2C transcript variant X1	NC_036781.1	4043514	4070442	TF313593	CTBP1	C-terminal binding protein 1 [Source:HGNC Symbol;Acc:2494]	C-terminal binding protein 1 [Source:HGNC Symbol;Acc:2494]
LOC101484249	cxcl14	C-X-C motif chemokine ligand 14	NC_036781.1	4197138	4205680	TF332769	CXCL14	chemokine (C-X-C motif) ligand 14 [Source:HGNC Symbol;Acc:10640]	chemokine (C-X-C motif) ligand 14 [Source:ZFIN;Acc:ZDB-GENE-000619-1]	None	NANoHomolog
LOC111500321	lingo2	leucine rich repeat and Ig domain containing 2	NC_036781.1	4424234	4506459	TF334360	LINGO2	leucine rich repeat and Ig domain containing 2 [Source:HGNC Symbol;Acc:21207]	leucine rich repeat and Ig domain containing 2 [Source:HGNC Symbol;Acc:21207]
LOC101484794	LOC101484794	uncharacterized LOC101484794	NC_036781.1	4567967	4634943	NA	NA	NA	NA
LOC101470920	LOC101470920	G2/M phase-specific E3 ubiquitin-protein ligase	NC_036781.1	4716446	4718327	TF325426	G2E3	G2/M-phase specific E3 ubiquitin protein ligase [Source:HGNC Symbol;Acc:20338]	G2/M-phase specific E3 ubiquitin ligase [Source:ZFIN;Acc:ZDB-GENE-030616-400]
LOC112435354	LOC112435354	uncharacterized LOC112435354%2C transcript variant X2	NC_036781.1	4841750	4844032	NA	NA	NA	NA
LOC101486024	gar1	GAR1 ribonucleoprotein	NC_036781.1	4912326	4915992	TF350747	GAR1	GAR1 ribonucleoprotein homolog (yeast) [Source:HGNC Symbol;Acc:14264]	GAR1 ribonucleoprotein homolog (yeast) [Source:ZFIN;Acc:ZDB-GENE-040426-893]	None	NANoHomolog
LOC101485738	LOC101485738	alcohol dehydrogenase class-3	NC_036781.1	4915971	4920283	TF300429	ADH4	alcohol dehydrogenase 4 (class II), pi polypeptide [Source:HGNC Symbol;Acc:252]	zgc:63568 [Source:ZFIN;Acc:ZDB-GENE-040426-1165]
LOC112429712	LOC112429712	uncharacterized LOC112429712	NC_036781.1	5113196	5114899	TF343970	NA	NA	Uncharacterized protein [Source:UniProtKB/TrEMBL;Acc:F1Q9E7]
LOC101486796	elovl6	ELOVL fatty acid elongase 6	NC_036781.1	5120698	5143847	TF106467	ELOVL6	ELOVL fatty acid elongase 6 [Source:HGNC Symbol;Acc:15829]	ELOVL family member 6, elongation of long chain fatty acids (yeast) [Source:ZFIN;Acc:ZDB-GENE-030114-1]
LOC101487654	gpm6a	glycoprotein M6A	NC_036781.1	5182641	5203170	TF315162	GPM6A	glycoprotein M6A [Source:HGNC Symbol;Acc:4460]	glycoprotein M6Aa [Source:ZFIN;Acc:ZDB-GENE-030710-7]
LOC101465090	LOC101465090	teneurin-3%2C transcript variant X1	NC_036781.1	5257850	5391306	TF316833	TENM3	teneurin transmembrane protein 3 [Source:HGNC Symbol;Acc:29944]	si:dkey-237h12.3 [Source:ZFIN;Acc:ZDB-GENE-081027-3]
LOC101465374	aga	aspartylglucosaminidase	NC_036781.1	5437535	5447237	TF300756	AGA	aspartylglucosaminidase [Source:HGNC Symbol;Acc:318]	aspartylglucosaminidase [Source:ZFIN;Acc:ZDB-GENE-040426-2311]
LOC101466454	glrb	glycine receptor beta	NC_036781.1	5546318	5576555	TF315453	GLRB	glycine receptor, beta [Source:HGNC Symbol;Acc:4329]	glycine receptor, beta b [Source:ZFIN;Acc:ZDB-GENE-040801-106]
LOC101466731	gria2	glutamate ionotropic receptor AMPA type subunit 2%2C transcript variant X2	NC_036781.1	5586366	5638406	TF315232	GRIA2	glutamate receptor, ionotropic, AMPA 2 [Source:HGNC Symbol;Acc:4572]	glutamate receptor, ionotropic, AMPA 2b [Source:ZFIN;Acc:ZDB-GENE-020125-4]
LOC101467596	fam198b	family with sequence similarity 198 member B	NC_036781.1	5718316	5724745	TF330994	FAM198B	family with sequence similarity 198, member B [Source:HGNC Symbol;Acc:25312]	family with sequence similarity 198, member B [Source:ZFIN;Acc:ZDB-GENE-100105-1]
LOC101468400	rxfp1	relaxin family peptide receptor 1	NC_036781.1	5766165	5860903	TF326185	RXFP1	relaxin/insulin-like family peptide receptor 1 [Source:HGNC Symbol;Acc:19718]	relaxin/insulin-like family peptide receptor 1 [Source:ZFIN;Acc:ZDB-GENE-110125-1]
LOC101472142	lg2h4orf45	linkage group 2 C4orf45 homolog	NC_036781.1	5921651	5922784	TF329701	C4orf45	chromosome 4 open reading frame 45 [Source:HGNC Symbol;Acc:26342]	NA	None	NANoHomolog
LOC101469290	rapgef2	Rap guanine nucleotide exchange factor 2%2C transcript variant X1	NC_036781.1	5924692	6030443	TF313184	RAPGEF2	Rap guanine nucleotide exchange factor (GEF) 2 [Source:HGNC Symbol;Acc:16854]	Rap guanine nucleotide exchange factor (GEF) 2 [Source:ZFIN;Acc:ZDB-GENE-030131-6959]
LOC101471283	fstl5	follistatin like 5%2C transcript variant X1	NC_036781.1	6232924	6430908	TF350473	FSTL5	follistatin-like 5 [Source:HGNC Symbol;Acc:21386]	follistatin-like 5 [Source:ZFIN;Acc:ZDB-GENE-070127-1]
LOC101471773	qdpr	quinoid dihydropteridine reductase	NC_036781.1	6461047	6472259	TF105932	QDPR	quinoid dihydropteridine reductase [Source:HGNC Symbol;Acc:9752]	quinoid dihydropteridine reductase a [Source:ZFIN;Acc:ZDB-GENE-070705-197]
LOC101472055	ldb2	LIM domain binding 2%2C transcript variant X1	NC_036781.1	6511800	6643883	TF319923	LDB2	LIM domain binding 2 [Source:HGNC Symbol;Acc:6533]	LIM-domain binding factor 2a [Source:ZFIN;Acc:ZDB-GENE-990415-136]
LOC101477952	tmem33	transmembrane protein 33	NC_036781.1	6839074	6846782	TF314068	TMEM33	transmembrane protein 33 [Source:HGNC Symbol;Acc:25541]	transmembrane protein 33 [Source:ZFIN;Acc:ZDB-GENE-030131-5425]
LOC101478406	phox2b	paired like homeobox 2b	NC_036781.1	6892173	6895470	TF351612	PHOX2B	paired-like homeobox 2b [Source:HGNC Symbol;Acc:9143]	paired-like homeobox 2bb [Source:ZFIN;Acc:ZDB-GENE-050407-3]
LOC101478690	limch1	LIM and calponin homology domains 1%2C transcript variant X1	NC_036781.1	6896727	6981211	TF332155	LMO7	LIM domain 7 [Source:HGNC Symbol;Acc:6646]	LIM and calponin homology domains 1b [Source:ZFIN;Acc:ZDB-GENE-030131-9210]
LOC112430069	LOC112430069	uncharacterized LOC112430069	NC_036781.1	7030720	7034157	NA	NA	NA	NA
LOC101480886	pcgf1	polycomb group ring finger 1%2C transcript variant X1	NC_036781.1	7236730	7249028	TF324206	PCGF1	polycomb group ring finger 1 [Source:HGNC Symbol;Acc:17615]	polycomb group ring finger 1 [Source:ZFIN;Acc:ZDB-GENE-030616-605]
LOC101481167	LOC101481167	fibroblast growth factor 18%2C transcript variant X1	NC_036781.1	7311467	7323813	TF331233	FGF18	fibroblast growth factor 18 [Source:HGNC Symbol;Acc:3674]	fibroblast growth factor 24 [Source:ZFIN;Acc:ZDB-GENE-030708-1]
LOC101481654	LOC101481654	nucleophosmin	NC_036781.1	7347170	7362461	TF327704	NPM3	nucleophosmin/nucleoplasmin 3 [Source:HGNC Symbol;Acc:7931]	nucleophosmin/nucleoplasmin, 1b [Source:ZFIN;Acc:ZDB-GENE-080723-7]
LOC101481941	tlx2	T cell leukemia homeobox 2%2C transcript variant X2	NC_036781.1	7368160	7379721	TF325347	TLX2	T-cell leukemia homeobox 2 [Source:HGNC Symbol;Acc:5057]	T-cell leukemia, homeobox 2 [Source:ZFIN;Acc:ZDB-GENE-020208-1]
LOC101473622	adad1	adenosine deaminase domain containing 1%2C transcript variant X1	NC_036781.1	7455324	7477077	TF315806	ADAD1	adenosine deaminase domain containing 1 (testis-specific) [Source:HGNC Symbol;Acc:30713]	adenosine deaminase domain containing 1 (testis-specific) [Source:HGNC Symbol;Acc:30713]
LOC101483784	nudt6	nudix hydrolase 6%2C transcript variant X2	NC_036781.1	7544690	7561503	TF106346	NUDT6	nudix (nucleoside diphosphate linked moiety X)-type motif 6 [Source:HGNC Symbol;Acc:8053]	nudix (nucleoside diphosphate linked moiety X)-type motif 6 [Source:ZFIN;Acc:ZDB-GENE-070410-44]
LOC101484059	spata5	spermatogenesis associated 5%2C transcript variant X1	NC_036781.1	7562153	7671036	TF314525	SPATA5	spermatogenesis associated 5 [Source:HGNC Symbol;Acc:18119]	Uncharacterized protein [Source:UniProtKB/TrEMBL;Acc:E7EXQ3]
LOC101484338	spry1	sprouty RTK signaling antagonist 1	NC_036781.1	7673054	7677221	TF325070	SPRY1	sprouty homolog 1, antagonist of FGF signaling (Drosophila) [Source:HGNC Symbol;Acc:11269]	sprouty homolog 1 (Drosophila) [Source:ZFIN;Acc:ZDB-GENE-081215-2]
LOC101484599	ankrd50	ankyrin repeat domain 50	NC_036781.1	7831852	7873914	TF354223	NA	NA	NA
LOC101484878	LOC101484878	CD209 antigen	NC_036781.1	7951964	7956243	TF333341	CLEC4E	C-type lectin domain family 4, member E [Source:HGNC Symbol;Acc:14555]	si:ch73-343l4.6 [Source:ZFIN;Acc:ZDB-GENE-090313-158]
LOC101465158	fat4	FAT atypical cadherin 4	NC_036781.1	8046361	8151962	TF331335	FAT4	FAT tumor suppressor homolog 4 (Drosophila) [Source:HGNC Symbol;Acc:23109]	FAT tumor suppressor homolog 4 (Drosophila) [Source:HGNC Symbol;Acc:23109]
LOC101469539	slc49a3	solute carrier family 49 member 3%2C transcript variant X1	NC_036781.1	8541625	8560551	TF314292	MFSD7	major facilitator superfamily domain containing 7 [Source:HGNC Symbol;Acc:26177]	Uncharacterized protein [Source:UniProtKB/TrEMBL;Acc:F1QIQ3]
LOC101469812	pcgf3	polycomb group ring finger 3	NC_036781.1	8565251	8639534	TF324206	PCGF3	polycomb group ring finger 3 [Source:HGNC Symbol;Acc:10066]	polycomb group ring finger 1 [Source:ZFIN;Acc:ZDB-GENE-030616-605]
LOC101478771	LOC101478771	matrin-3%2C transcript variant X2	NC_036781.1	8957035	8968876	TF333921	MATR3	matrin 3 [Source:HGNC Symbol;Acc:6912]	matrin 3-like 1.1 [Source:ZFIN;Acc:ZDB-GENE-030616-40]
LOC112435946	LOC112435946	uncharacterized LOC112435946	NC_036781.1	9029712	9030974	NA	NA	NA	NA
LOC101485630	LOC101485630	transcription factor COE3	NC_036781.1	9214103	9350261	TF313391	EBF1	early B-cell factor 1 [Source:HGNC Symbol;Acc:3126]	early B-cell factor 3 [Source:ZFIN;Acc:ZDB-GENE-070112-292]
LOC101486786	dgkq	diacylglycerol kinase theta%2C transcript variant X1	NC_036781.1	9409047	9441173	TF312817	DGKQ	diacylglycerol kinase, theta 110kDa [Source:HGNC Symbol;Acc:2856]	diacylglycerol kinase, zeta a [Source:ZFIN;Acc:ZDB-GENE-111104-3]
LOC101487264	mgat4b	mannosyl (alpha-1%2C3-)-glycoprotein beta-1%2C4-N-acetylglucosaminyltransferase%2C isozyme B	NC_036781.1	9452476	9579696	TF324570	MGAT4B	mannosyl (alpha-1,3-)-glycoprotein beta-1,4-N-acetylglucosaminyltransferase, isozyme B [Source:HGNC Symbol;Acc:7048]	mannosyl (alpha-1,3-)-glycoprotein beta-1,4-N-acetylglucosaminyltransferase, isozyme B [Source:ZFIN;Acc:ZDB-GENE-040704-19]
LOC101487554	canx	calnexin	NC_036781.1	9588340	9606815	TF300618	CANX	calnexin [Source:HGNC Symbol;Acc:1473]	calnexin [Source:ZFIN;Acc:ZDB-GENE-040426-2797]
LOC101487841	maml1	mastermind like transcriptional coactivator 1%2C transcript variant X1	NC_036781.1	9607921	9624120	TF332922	MAML1	mastermind-like 1 (Drosophila) [Source:HGNC Symbol;Acc:13632]	Uncharacterized protein [Source:UniProtKB/TrEMBL;Acc:E7F0M7]
LOC101463928	ltc4s	leukotriene C4 synthase%2C transcript variant X1	NC_036781.1	9634751	9639907	TF105328	LTC4S	leukotriene C4 synthase [Source:HGNC Symbol;Acc:6719]	leukotriene C4 synthase [Source:ZFIN;Acc:ZDB-GENE-110411-32]
LOC101464410	LOC101464410	coiled-coil domain-containing protein 69	NC_036781.1	9651261	9670621	TF333416	MTUS2	microtubule associated tumor suppressor candidate 2 [Source:HGNC Symbol;Acc:20595]	microtubule associated tumor suppressor candidate 2 [Source:ZFIN;Acc:ZDB-GENE-091204-75]
LOC101464700	LOC101464700	homeobox protein EMX1-like	NC_036781.1	9682806	9700101	TF317015	EMX1	empty spiracles homeobox 1 [Source:HGNC Symbol;Acc:3340]	empty spiracles homeobox 3 [Source:ZFIN;Acc:ZDB-GENE-990415-53]
LOC101465550	LOC101465550	transmembrane protein 216%2C transcript variant X1	NC_036781.1	9819113	9821893	TF323824	TMEM216	transmembrane protein 216 [Source:HGNC Symbol;Acc:25018]	Transmembrane protein 216 [Source:UniProtKB/Swiss-Prot;Acc:E7EYQ9]
LOC112436246	LOC112436246	uncharacterized LOC112436246	NC_036781.1	10103555	10106273	NA	NA	NA	NA
LOC101466248	LOC101466248	uncharacterized LOC101466248	NC_036781.1	10137522	10138245	NA	NA	NA	NA
LOC106675847	LOC106675847	uncharacterized LOC106675847%2C transcript variant X1	NC_036781.1	10275764	10281882	NA	NA	NA	NA
LOC112436266	LOC112436266	uncharacterized LOC112436266	NC_036781.1	10365814	10367187	NA	NA	NA	NA
LOC101466442	LOC101466442	uncharacterized LOC101466442	NC_036781.1	10445070	10447474	NA	NA	NA	NA
LOC106675165	LOC106675165	uncharacterized LOC106675165	NC_036781.1	10780613	10782076	NA	NA	NA	NA
LOC112436116	LOC112436116	uncharacterized LOC112436116	NC_036781.1	10815467	10816938	NA	NA	NA	NA
LOC101466889	LOC101466889	protocadherin-1%2C transcript variant X2	NC_036781.1	10841468	11074953	TF320624	PCDH1	protocadherin 1 [Source:HGNC Symbol;Acc:8655]	protocadherin 1b [Source:ZFIN;Acc:ZDB-GENE-091015-2]
LOC112436388	LOC112436388	uncharacterized LOC112436388	NC_036781.1	11096666	11156253	NoHit	NA	NA	NA
LOC112435536	LOC112435536	uncharacterized LOC112435536%2C transcript variant X1	NC_036781.1	11192470	11195566	NA	NA	NA	NA
LOC101467584	LOC101467584	uncharacterized LOC101467584	NC_036781.1	11377022	11377668	NA	NA	NA	NA
LOC101484508	hspa9	heat shock protein family A (Hsp70) member 9	NC_036781.1	11456112	11477198	TF105046	HSPA9	heat shock 70kDa protein 9 (mortalin) [Source:HGNC Symbol;Acc:5244]	heat shock protein 9 [Source:ZFIN;Acc:ZDB-GENE-030828-12]
LOC112435440	LOC112435440	uncharacterized LOC112435440	NC_036781.1	11620781	11622837	NA	NA	NA	NA
LOC112436259	LOC112436259	uncharacterized LOC112436259	NC_036781.1	11693633	11695363	NA	NA	NA	NA
LOC112436255	LOC112436255	uncharacterized LOC112436255	NC_036781.1	11695690	11698058	TF354128	NA	NA	Uncharacterized protein [Source:UniProtKB/TrEMBL;Acc:E7F8H0]
LOC112435538	LOC112435538	uncharacterized LOC112435538	NC_036781.1	11779661	11780540	NA	NA	NA	NA
LOC112435539	LOC112435539	uncharacterized LOC112435539	NC_036781.1	11782708	11783859	NA	NA	NA	NA
LOC101475745	pde6a	phosphodiesterase 6A	NC_036781.1	11813995	11839273	TF316499	PDE6A	phosphodiesterase 6A, cGMP-specific, rod, alpha [Source:HGNC Symbol;Acc:8785]	phosphodiesterase 6A, cGMP-specific, rod, alpha [Source:ZFIN;Acc:ZDB-GENE-030616-42]
LOC101475443	slc26a2	solute carrier family 26 member 2	NC_036781.1	11840706	11854047	TF313784	SLC26A2	solute carrier family 26 (sulfate transporter), member 2 [Source:HGNC Symbol;Acc:10994]	solute carrier family 26 (sulfate transporter), member 2 [Source:ZFIN;Acc:ZDB-GENE-030717-3]
LOC101474761	LOC101474761	5-hydroxytryptamine receptor 4%2C transcript variant X2	NC_036781.1	11912578	12072684	TF316350	HTR4	5-hydroxytryptamine (serotonin) receptor 4, G protein-coupled [Source:HGNC Symbol;Acc:5299]	5-hydroxytryptamine (serotonin) receptor 4, G protein-coupled [Source:HGNC Symbol;Acc:5299]
LOC101474008	sparc	secreted protein acidic and cysteine rich	NC_036781.1	12159304	12173692	TF319356	SPARC	secreted protein, acidic, cysteine-rich (osteonectin) [Source:HGNC Symbol;Acc:11219]	secreted acidic cysteine rich glycoprotein [Source:ZFIN;Acc:ZDB-GENE-030131-9]
LOC101472828	LOC101472828	proton-coupled amino acid transporter 1%2C transcript variant X1	NC_036781.1	12193669	12237930	TF314873	SLC36A1	solute carrier family 36 (proton/amino acid symporter), member 1 [Source:HGNC Symbol;Acc:18761]	solute carrier family 36 (proton/amino acid symporter), member 1 [Source:ZFIN;Acc:ZDB-GENE-061117-1]
LOC101472049	fat2	FAT atypical cadherin 2	NC_036781.1	12320855	12414126	TF316403	FAT2	FAT tumor suppressor homolog 2 (Drosophila) [Source:HGNC Symbol;Acc:3596]	Uncharacterized protein [Source:UniProtKB/TrEMBL;Acc:E7FB42]
LOC112435762	LOC112435762	uncharacterized LOC112435762	NC_036781.1	12930121	12930854	NA	NA	NA	NA
LOC101483378	LOC101483378	uncharacterized LOC101483378	NC_036781.1	12937013	12942102	NA	NA	NA	NA
LOC112435353	LOC112435353	uncharacterized LOC112435353	NC_036781.1	13426085	13426690	NA	NA	NA	NA
LOC106675332	LOC106675332	uncharacterized LOC106675332%2C transcript variant X1	NC_036781.1	13459744	13462796	NA	NA	NA	NA
LOC112435547	LOC112435547	uncharacterized LOC112435547	NC_036781.1	13569170	13570974	NA	NA	NA	NA
LOC112435545	LOC112435545	uncharacterized LOC112435545	NC_036781.1	13575087	13575872	NA	NA	NA	NA
LOC112436400	LOC112436400	uncharacterized LOC112436400	NC_036781.1	13884851	13885375	NA	NA	NA	NA
LOC112436124	LOC112436124	uncharacterized LOC112436124	NC_036781.1	13902931	13907373	TF352882	NA	NA	NA
LOC112436270	LOC112436270	uncharacterized LOC112436270	NC_036781.1	13971167	13972938	NA	NA	NA	NA
LOC101477746	slitrk2	SLIT and NTRK like family member 2	NC_036781.1	13990624	13995030	TF351826	SLITRK2	SLIT and NTRK-like family, member 2 [Source:HGNC Symbol;Acc:13449]	SLIT and NTRK-like family, member 2 [Source:ZFIN;Acc:ZDB-GENE-080327-7]
LOC112436132	LOC112436132	elongation of very long chain fatty acids protein 4-like	NC_036781.1	14068508	14072218	TF323454	ELOVL4	ELOVL fatty acid elongase 4 [Source:HGNC Symbol;Acc:14415]	elongation of very long chain fatty acids (FEN1/Elo2, SUR4/Elo3, yeast)-like 4a [Source:ZFIN;Acc:ZDB-GENE-040426-1767]
LOC105941199	LOC105941199	calnexin	NC_036781.1	14267556	14271119	TF300618	CANX	calnexin [Source:HGNC Symbol;Acc:1473]	si:ch211-274f20.2 [Source:ZFIN;Acc:ZDB-GENE-091204-91]
LOC101485311	fgl1	fibrinogen like 1	NC_036781.1	14272909	14277877	TF336658	FGL1	fibrinogen-like 1 [Source:HGNC Symbol;Acc:3695]	fibrinogen-like 1 [Source:HGNC Symbol;Acc:3695]
LOC101484824	snx25	sorting nexin 25%2C transcript variant X1	NC_036781.1	14279017	14300527	TF324055	SNX25	sorting nexin 25 [Source:HGNC Symbol;Acc:21883]	sorting nexin 25 [Source:ZFIN;Acc:ZDB-GENE-121105-11]
LOC101484172	LOC101484172	centrosome and spindle pole associated protein 1%2C transcript variant X1	NC_036781.1	14301320	14320239	TF335475	CSPP1	centrosome and spindle pole associated protein 1 [Source:HGNC Symbol;Acc:26193]	si:dkey-97a13.9 [Source:ZFIN;Acc:ZDB-GENE-070912-619]
LOC101467026	LOC101467026	X-linked interleukin-1 receptor accessory protein-like 2	NC_036781.1	14523777	15008399	TF333913	IL1RAPL2	interleukin 1 receptor accessory protein-like 2 [Source:HGNC Symbol;Acc:5997]	interleukin 1 receptor accessory protein-like 2 [Source:ZFIN;Acc:ZDB-GENE-040219-5]
LOC101467317	aff2	AF4/FMR2 family member 2%2C transcript variant X1	NC_036781.1	15251212	15455048	TF326216	AFF2	AF4/FMR2 family, member 2 [Source:HGNC Symbol;Acc:3776]	AF4/FMR2 family, member 2 [Source:ZFIN;Acc:ZDB-GENE-110411-190]
LOC101484170	ids	iduronate 2-sulfatase	NC_036781.1	15470883	15481773	TF323156	IDS	iduronate 2-sulfatase [Source:HGNC Symbol;Acc:5389]	iduronate 2-sulfatase [Source:ZFIN;Acc:ZDB-GENE-061215-37]
LOC101464073	syvn1	synoviolin 1	NC_036781.1	15618096	15629298	TF318635	SYVN1	synovial apoptosis inhibitor 1, synoviolin [Source:HGNC Symbol;Acc:20738]	synovial apoptosis inhibitor 1, synoviolin [Source:ZFIN;Acc:ZDB-GENE-030131-7166]
LOC101464356	LOC101464356	mothers against decapentaplegic homolog 5%2C transcript variant X2	NC_036781.1	15631924	15643009	TF314923	SMAD5	SMAD family member 5 [Source:HGNC Symbol;Acc:6771]	MAD homolog 5 (Drosophila) [Source:ZFIN;Acc:ZDB-GENE-990603-9]
LOC101467731	pigg	phosphatidylinositol glycan anchor biosynthesis class G%2C transcript variant X1	NC_036781.1	15802510	15890009	TF300609	PIGG	phosphatidylinositol glycan anchor biosynthesis, class G [Source:HGNC Symbol;Acc:25985]	Uncharacterized protein [Source:UniProtKB/TrEMBL;Acc:E7FE54]
LOC101470250	LOC101470250	pro-neuregulin-2%2C membrane-bound isoform%2C transcript variant X1	NC_036781.1	15967519	16041723	TF332469	NRG2	neuregulin 2 [Source:HGNC Symbol;Acc:7998]	neuregulin 2b [Source:ZFIN;Acc:ZDB-GENE-090205-2]
LOC101468236	psd2	pleckstrin and Sec7 domain containing 2%2C transcript variant X1	NC_036781.1	16058022	16097992	TF319755	PSD2	pleckstrin and Sec7 domain containing 2 [Source:HGNC Symbol;Acc:19092]	Uncharacterized protein [Source:UniProtKB/TrEMBL;Acc:E7EZJ7]
LOC101471217	LOC101471217	SH2 domain-containing protein 4A%2C transcript variant X1	NC_036781.1	16111307	16119988	TF336893	SH2D4B	SH2 domain containing 4B [Source:HGNC Symbol;Acc:31440]	SH2 domain containing 4B [Source:HGNC Symbol;Acc:31440]
LOC101473158	LOC101473158	bromodomain-containing protein 8%2C transcript variant X1	NC_036781.1	16217217	16232307	TF106422	BRD8	bromodomain containing 8 [Source:HGNC Symbol;Acc:19874]	bromodomain containing 8 [Source:ZFIN;Acc:ZDB-GENE-030722-10]
LOC101473864	LOC101473864	glypican-6	NC_036781.1	16238119	16271001	TF105317	GPC4	glypican 4 [Source:HGNC Symbol;Acc:4452]	glypican 4 [Source:ZFIN;Acc:ZDB-GENE-011119-1]
LOC101474160	gpc3	glypican 3	NC_036781.1	16272882	16406977	TF105317	GPC3	glypican 3 [Source:HGNC Symbol;Acc:4451]	glypican 3 [Source:ZFIN;Acc:ZDB-GENE-031212-1]
LOC101468828	LOC101468828	platelet-derived growth factor receptor-like protein	NC_036781.1	16615960	16621300	TF325768	PDGFRA	platelet-derived growth factor receptor, alpha polypeptide [Source:HGNC Symbol;Acc:8803]	kit receptor a [Source:ZFIN;Acc:ZDB-GENE-980526-464]
LOC101480330	mtus1	microtubule associated scaffold protein 1%2C transcript variant X2	NC_036781.1	16622148	16648804	TF333416	MTUS1	microtubule associated tumor suppressor 1 [Source:HGNC Symbol;Acc:29789]	mitochondrial tumor suppressor 1a [Source:ZFIN;Acc:ZDB-GENE-061103-409]
LOC101480904	vamp7	vesicle associated membrane protein 7%2C transcript variant X1	NC_036781.1	16649036	16652404	TF323448	VAMP7	vesicle-associated membrane protein 7 [Source:HGNC Symbol;Acc:11486]	synaptobrevin-like 1 [Source:ZFIN;Acc:ZDB-GENE-040426-1055]
LOC101480611	LOC101480611	DNA-directed RNA polymerases I and III subunit RPAC2	NC_036781.1	16652917	16662233	TF103035	POLR1D	polymerase (RNA) I polypeptide D, 16kDa [Source:HGNC Symbol;Acc:20422]	polymerase (RNA) I polypeptide D [Source:ZFIN;Acc:ZDB-GENE-040930-4]	None	NANoHomolog
LOC101484171	sh3bgrl	SH3 domain binding glutamate rich protein like	NC_036781.1	16840192	16853337	TF105574	SH3BGRL	SH3 domain binding glutamic acid-rich protein like [Source:HGNC Symbol;Acc:10823]	SH3 domain binding glutamic acid-rich protein like [Source:HGNC Symbol;Acc:10823]
LOC101485212	LOC101485212	transmembrane protein 182	NC_036781.1	16869572	16878185	TF331344	TMEM182	transmembrane protein 182 [Source:HGNC Symbol;Acc:26391]	transmembrane protein 182 [Source:ZFIN;Acc:ZDB-GENE-050306-22]
LOC101469684	tenm1	teneurin transmembrane protein 1	NC_036781.1	17061864	17257260	TF316833	TENM1	teneurin transmembrane protein 1 [Source:HGNC Symbol;Acc:8117]	teneurin transmembrane protein 1 [Source:ZFIN;Acc:ZDB-GENE-060531-26]
LOC101487877	arhgef9	Cdc42 guanine nucleotide exchange factor 9%2C transcript variant X3	NC_036781.1	17382833	17426128	TF316832	ARHGEF9	Cdc42 guanine nucleotide exchange factor (GEF) 9 [Source:HGNC Symbol;Acc:14561]	Cdc42 guanine nucleotide exchange factor (GEF) 9a [Source:ZFIN;Acc:ZDB-GENE-070705-271]
LOC101465025	zc4h2	zinc finger C4H2-type containing	NC_036781.1	17437639	17450482	TF315275	ZC4H2	zinc finger, C4H2 domain containing [Source:HGNC Symbol;Acc:24931]	zinc finger, C4H2 domain containing [Source:ZFIN;Acc:ZDB-GENE-030131-2207]
LOC101465591	LOC101465591	moesin%2C transcript variant X1	NC_036781.1	17452420	17464341	TF313935	MSN	moesin [Source:HGNC Symbol;Acc:7373]	moesin b [Source:ZFIN;Acc:ZDB-GENE-030717-7]
LOC101466282	LOC101466282	androgen receptor%2C transcript variant X1	NC_036781.1	17466036	17476337	TF106510	NR3C2	nuclear receptor subfamily 3, group C, member 2 [Source:HGNC Symbol;Acc:7979]	androgen receptor [Source:ZFIN;Acc:ZDB-GENE-060131-1]
LOC101466755	efnb1	ephrin B1	NC_036781.1	17511695	17570186	TF315495	NA	NA	NA
LOC101471617	acsl4	acyl-CoA synthetase long chain family member 4	NC_036781.1	17630919	17640667	TF314012	ACSL4	acyl-CoA synthetase long-chain family member 4 [Source:HGNC Symbol;Acc:3571]	acyl-CoA synthetase long-chain family member 4a [Source:ZFIN;Acc:ZDB-GENE-040426-1565]
LOC101470261	tenm2	teneurin transmembrane protein 2%2C transcript variant X1	NC_036781.1	17670431	17892093	TF316833	TENM2	teneurin transmembrane protein 2 [Source:HGNC Symbol;Acc:29943]	Uncharacterized protein [Source:UniProtKB/TrEMBL;Acc:F1R1T0]
LOC111501294	LOC111501294	uncharacterized LOC111501294	NC_036781.1	18260103	18260680	NA	NA	NA	NA
LOC101469513	LOC101469513	insulin	NC_036781.1	18286416	18288889	TF332820	INS	insulin [Source:HGNC Symbol;Acc:6081]	preproinsulin [Source:ZFIN;Acc:ZDB-GENE-980526-110]
LOC101468833	hmmr	hyaluronan mediated motility receptor%2C transcript variant X1	NC_036781.1	18289129	18296428	TF333963	HMMR	hyaluronan-mediated motility receptor (RHAMM) [Source:HGNC Symbol;Acc:5012]	hyaluronan-mediated motility receptor (RHAMM) [Source:ZFIN;Acc:ZDB-GENE-030131-731]
LOC101467638	LOC101467638	LON peptidase N-terminal domain and RING finger protein 1	NC_036781.1	18344033	18357257	TF327043	LONRF1	LON peptidase N-terminal domain and ring finger 1 [Source:HGNC Symbol;Acc:26302]	LON peptidase N-terminal domain and ring finger 1 [Source:ZFIN;Acc:ZDB-GENE-101021-4]
LOC101467141	LOC101467141	glutamate receptor 1%2C transcript variant X1	NC_036781.1	18392769	18612384	TF315232	GRIA4	glutamate receptor, ionotropic, AMPA 4 [Source:HGNC Symbol;Acc:4574]	glutamate receptor, ionotropic, AMPA 1a [Source:ZFIN;Acc:ZDB-GENE-020125-1]
LOC101466672	LOC101466672	thymosin beta	NC_036781.1	18778687	18780686	TF313856	NA	NA	NA	None	NANoHomolog
LOC101487703	sh3tc2	SH3 domain and tetratricopeptide repeats 2%2C transcript variant X1	NC_036781.1	18905674	18923414	TF333167	SH3TC2	SH3 domain and tetratricopeptide repeats 2 [Source:HGNC Symbol;Acc:29427]	SH3 domain and tetratricopeptide repeats 2 [Source:ZFIN;Acc:ZDB-GENE-081104-347]
LOC101464181	LOC101464181	transcription factor COE1%2C transcript variant X2	NC_036781.1	19016399	19072013	TF313391	EBF1	early B-cell factor 1 [Source:HGNC Symbol;Acc:3126]	early B-cell factor 1a [Source:ZFIN;Acc:ZDB-GENE-081028-51]
LOC101484002	LOC101484002	serine/threonine-protein phosphatase 2A 55 kDa regulatory subunit B beta isoform%2C transcript variant X1	NC_036781.1	19151299	19194412	TF105553	PPP2R2B	protein phosphatase 2, regulatory subunit B, beta [Source:HGNC Symbol;Acc:9305]	protein phosphatase 2, regulatory subunit B, beta a [Source:ZFIN;Acc:ZDB-GENE-101026-5]
LOC101482647	stc2	stanniocalcin 2	NC_036781.1	19272437	19278807	TF324693	STC2	stanniocalcin 2 [Source:HGNC Symbol;Acc:11374]	stanniocalcin 2a [Source:ZFIN;Acc:ZDB-GENE-041008-14]
LOC101480335	faf2	Fas associated factor family member 2	NC_036781.1	19364811	19371480	TF314172	FAF2	Fas associated factor family member 2 [Source:HGNC Symbol;Acc:24666]	Fas associated factor family member 2 [Source:ZFIN;Acc:ZDB-GENE-050208-312]
LOC101478725	rnf44	ring finger protein 44%2C transcript variant X5	NC_036781.1	19371630	19385207	TF325756	RNF44	ring finger protein 44 [Source:HGNC Symbol;Acc:19180]	ring finger protein 44 [Source:ZFIN;Acc:ZDB-GENE-060929-604]
LOC101477693	sncb	synuclein beta%2C transcript variant X1	NC_036781.1	19410728	19422638	TF332776	SNCB	synuclein, beta [Source:HGNC Symbol;Acc:11140]	synuclein, beta [Source:ZFIN;Acc:ZDB-GENE-040426-1615]
LOC112435537	LOC112435537	uncharacterized LOC112435537	NC_036781.1	19663519	19663915	NA	NA	NA	NA
LOC106676120	LOC106676120	uncharacterized LOC106676120	NC_036781.1	19667133	19667494	NA	NA	NA	NA
LOC101477413	ctnna1	catenin alpha 1	NC_036781.1	19728503	19808248	TF313686	CTNNA1	catenin (cadherin-associated protein), alpha 1, 102kDa [Source:HGNC Symbol;Acc:2509]	catenin (cadherin-associated protein), alpha 1 [Source:ZFIN;Acc:ZDB-GENE-991207-24]
LOC101476853	LOC101476853	melanin-concentrating hormone receptor 2	NC_036781.1	19846082	19850023	TF315737	MCHR2	melanin-concentrating hormone receptor 2 [Source:HGNC Symbol;Acc:20867]	melanin-concentrating hormone receptor 2 [Source:ZFIN;Acc:ZDB-GENE-030502-6]
LOC101476572	LOC101476572	tetraspanin-17	NC_036781.1	19886153	19908723	TF313002	TSPAN17	tetraspanin 17 [Source:HGNC Symbol;Acc:13594]	tetraspanin 17 [Source:HGNC Symbol;Acc:13594]
LOC101476286	synpo	synaptopodin%2C transcript variant X1	NC_036781.1	19910710	19926548	TF330867	SYNPO	synaptopodin [Source:HGNC Symbol;Acc:30672]	synaptopodin 2 [Source:HGNC Symbol;Acc:17732]
LOC101475783	dctn4	dynactin subunit 4%2C transcript variant X1	NC_036781.1	19957449	19967479	TF105249	DCTN4	dynactin 4 (p62) [Source:HGNC Symbol;Acc:15518]	dynactin 4 [Source:ZFIN;Acc:ZDB-GENE-050417-306]
LOC101474254	tnip1	TNFAIP3 interacting protein 1%2C transcript variant X1	NC_036781.1	19978276	19993260	TF351138	TNIP1	TNFAIP3 interacting protein 1 [Source:HGNC Symbol;Acc:16903]	TNFAIP3 interacting protein 1 [Source:ZFIN;Acc:ZDB-GENE-070112-1502]
LOC101472782	LOC101472782	platelet-derived growth factor receptor-like protein	NC_036781.1	20017939	20020590	TF325768	FLT1	fms-related tyrosine kinase 1 [Source:HGNC Symbol;Acc:3763]	kinase insert domain receptor like [Source:ZFIN;Acc:ZDB-GENE-000705-1]
LOC101467527	pdlim7	PDZ and LIM domain 7%2C transcript variant X1	NC_036781.1	20200882	20235666	TF106408	PDLIM7	PDZ and LIM domain 7 (enigma) [Source:HGNC Symbol;Acc:22958]	PDZ and LIM domain 7 [Source:ZFIN;Acc:ZDB-GENE-040426-2092]
LOC101466671	unc5a	unc-5 netrin receptor A%2C transcript variant X1	NC_036781.1	20240012	20403734	TF316767	UNC5A	unc-5 homolog A (C. elegans) [Source:HGNC Symbol;Acc:12567]	unc-5 homolog A (C. elegans) [Source:ZFIN;Acc:ZDB-GENE-080219-19]
LOC101466388	LOC101466388	neurogenin-2-like	NC_036781.1	20577110	20578369	TF315153	ATOH1	atonal homolog 1 (Drosophila) [Source:HGNC Symbol;Acc:797]	atonal homolog 1b [Source:ZFIN;Acc:ZDB-GENE-041201-1]
LOC101463681	flt4	fms related tyrosine kinase 4	NC_036781.1	20637499	20689229	TF325768	FLT4	fms-related tyrosine kinase 4 [Source:HGNC Symbol;Acc:3767]	fms-related tyrosine kinase 4 [Source:ZFIN;Acc:ZDB-GENE-980526-326]
LOC101487702	dusp1	dual specificity phosphatase 1	NC_036781.1	20715918	20719237	TF105122	DUSP1	dual specificity phosphatase 1 [Source:HGNC Symbol;Acc:3064]	dual specificity phosphatase 1 [Source:ZFIN;Acc:ZDB-GENE-040426-2018]
LOC101486928	LOC101486928	melatonin receptor type 1B	NC_036781.1	20765107	20773880	TF331693	MTNR1B	melatonin receptor 1B [Source:HGNC Symbol;Acc:7464]	melatonin receptor 1C [Source:ZFIN;Acc:ZDB-GENE-990415-158]
LOC112430078	LOC112430078	ectodysplasin-A-like	NC_036781.1	20829803	20841245	NA	NA	NA	NA
LOC101483616	nlgn3	neuroligin 3%2C transcript variant X1	NC_036781.1	21189244	21328086	TF326187	NLGN3	neuroligin 3 [Source:HGNC Symbol;Acc:14289]	neuroligin 3a [Source:ZFIN;Acc:ZDB-GENE-071219-1]
LOC101481491	fut11	fucosyltransferase 11%2C transcript variant X2	NC_036781.1	21366231	21372366	TF316348	FUT11	fucosyltransferase 11 (alpha (1,3) fucosyltransferase) [Source:HGNC Symbol;Acc:19233]	fucosyltransferase 11 (alpha (1,3) fucosyltransferase) [Source:ZFIN;Acc:ZDB-GENE-060929-728]
LOC101487310	LOC101487310	mucin-2%2C transcript variant X1	NC_036781.1	21372270	21389238	TF344085	NA	NA	zinc finger protein 185 (LIM domain) [Source:ZFIN;Acc:ZDB-GENE-061103-355]
LOC105940422	LOC105940422	probable pathogenesis-related protein ARB_02861%2C transcript variant X1	NC_036781.1	21512928	21532746	TF339610	NA	NA	NA
LOC101475489	frmpd3	FERM and PDZ domain containing 3%2C transcript variant X1	NC_036781.1	21587949	21640395	TF316497	FRMPD3	FERM and PDZ domain containing 3 [Source:HGNC Symbol;Acc:29382]	FERM and PDZ domain containing 3 [Source:HGNC Symbol;Acc:29382]
LOC101486456	LOC101486456	cis-aconitate decarboxylase-like	NC_036781.1	21837365	21840943	TF332296	IRG1	immunoresponsive 1 homolog (mouse) [Source:HGNC Symbol;Acc:33904]	immunoresponsive gene 1, like [Source:ZFIN;Acc:ZDB-GENE-061103-301]
LOC101472979	nexmif	neurite extension and migration factor%2C transcript variant X1	NC_036781.1	21866653	21921994	TF332248	KIAA2022	KIAA2022 [Source:HGNC Symbol;Acc:29433]	CantFind
LOC101471616	fgf16	fibroblast growth factor 16	NC_036781.1	22019406	22024762	TF317805	FGF16	fibroblast growth factor 16 [Source:HGNC Symbol;Acc:3672]	fibroblast growth factor 16 [Source:ZFIN;Acc:ZDB-GENE-060427-3]
LOC112435732	LOC112435732	uncharacterized LOC112435732	NC_036781.1	22219093	22225179	NA	NA	NA	NA
LOC112436152	LOC112436152	interferon-induced very large GTPase 1-like	NC_036781.1	22237548	22242108	TF335271	CARD6	caspase recruitment domain family, member 6 [Source:HGNC Symbol;Acc:16394]	Uncharacterized protein [Source:UniProtKB/TrEMBL;Acc:F1R1W9]
LOC101464081	LOC101464081	gamma-aminobutyric acid receptor subunit beta-2%2C transcript variant X1	NC_036781.1	22333724	22366868	TF315453	GABRB2	gamma-aminobutyric acid (GABA) A receptor, beta 2 [Source:HGNC Symbol;Acc:4082]	gamma-aminobutyric acid (GABA) A receptor, beta 2 [Source:ZFIN;Acc:ZDB-GENE-030131-8196]
LOC101485019	LOC101485019	uncharacterized LOC101485019%2C transcript variant X2	NC_036781.1	22522349	22532756	TF316327	NA	NA	NA
LOC101484731	LOC101484731	T-cell immunoglobulin and mucin domain-containing protein 4	NC_036781.1	22580551	22583231	TF336163	TIMD4	T-cell immunoglobulin and mucin domain containing 4 [Source:HGNC Symbol;Acc:25132]	hepatitis A virus cellular receptor 1 [Source:ZFIN;Acc:ZDB-GENE-040718-131]
LOC101483822	LOC101483822	Down syndrome cell adhesion molecule homolog%2C transcript variant X1	NC_036781.1	22588093	22592178	TF316846	SDK2	sidekick cell adhesion molecule 2 [Source:HGNC Symbol;Acc:19308]	sidekick homolog 2b (chicken) [Source:ZFIN;Acc:ZDB-GENE-030131-8203]
LOC101483521	egr1	early growth response 1	NC_036781.1	22623898	22628051	TF318980	EGR1	early growth response 1 [Source:HGNC Symbol;Acc:3238]	early growth response 1 [Source:ZFIN;Acc:ZDB-GENE-980526-320]
LOC106676112	LOC106676112	uncharacterized LOC106676112	NC_036781.1	22679249	22679903	NA	NA	NA	NA
LOC101482066	LOC101482066	spondin-2%2C transcript variant X1	NC_036781.1	22769616	22783019	TF326913	SPON2	spondin 2, extracellular matrix protein [Source:HGNC Symbol;Acc:11253]	spondin 2a, extracellular matrix protein [Source:ZFIN;Acc:ZDB-GENE-990415-160]
LOC101473796	col23a1	collagen type XXIII alpha 1 chain%2C transcript variant X6	NC_036781.1	22852053	22981807	TF338175	COL23A1	collagen, type XXIII, alpha 1 [Source:HGNC Symbol;Acc:22990]	collagen, type XXIII, alpha 1 [Source:HGNC Symbol;Acc:22990]
LOC101476217	rasgef1c	RasGEF domain family member 1C%2C transcript variant X2	NC_036781.1	22994953	23016565	TF313379	RASGEF1C	RasGEF domain family, member 1C [Source:HGNC Symbol;Acc:27400]	RasGEF domain family, member 1Ba [Source:ZFIN;Acc:ZDB-GENE-030131-5783]
LOC101477351	LOC101477351	uncharacterized LOC101477351	NC_036781.1	23064774	23068493	TF323577	ARHGAP25	Rho GTPase activating protein 25 [Source:HGNC Symbol;Acc:28951]	si:ch211-247j9.1 [Source:ZFIN;Acc:ZDB-GENE-091204-212]
LOC101478756	LOC101478756	A disintegrin and metalloproteinase with thrombospondin motifs 2	NC_036781.1	23154547	23301239	TF313537	ADAMTS2	ADAM metallopeptidase with thrombospondin type 1 motif, 2 [Source:HGNC Symbol;Acc:218]	ADAM metallopeptidase with thrombospondin type 1 motif, 2 [Source:HGNC Symbol;Acc:218]
LOC101479043	cnot6	CCR4-NOT transcription complex subunit 6	NC_036781.1	23381314	23395171	TF323175	CNOT6	CCR4-NOT transcription complex, subunit 6 [Source:HGNC Symbol;Acc:14099]	CCR4-NOT transcription complex, subunit 6 [Source:ZFIN;Acc:ZDB-GENE-030131-2768]
LOC101479314	simc1	SUMO interacting motifs containing 1%2C transcript variant X1	NC_036781.1	23395745	23405133	TF332523	SIMC1	SUMO-interacting motifs containing 1 [Source:HGNC Symbol;Acc:24779]	SUMO-interacting motifs containing 1 [Source:HGNC Symbol;Acc:24779]	None	NANoHomolog
LOC101482509	ndst1	N-deacetylase and N-sulfotransferase 1%2C transcript variant X2	NC_036781.1	23533197	23585890	TF313193	NDST1	N-deacetylase/N-sulfotransferase (heparan glucosaminyl) 1 [Source:HGNC Symbol;Acc:7680]	Uncharacterized protein [Source:UniProtKB/TrEMBL;Acc:E7F0G2]
LOC101484032	csf1r	colony stimulating factor 1 receptor%2C transcript variant X1	NC_036781.1	23639385	23650573	TF325768	CSF1R	colony stimulating factor 1 receptor [Source:HGNC Symbol;Acc:2433]	colony stimulating factor 1 receptor, a [Source:ZFIN;Acc:ZDB-GENE-001205-1]
LOC101484671	pdgfrb	platelet derived growth factor receptor beta	NC_036781.1	23650986	23681644	TF325768	PDGFRB	platelet-derived growth factor receptor, beta polypeptide [Source:HGNC Symbol;Acc:8804]	platelet derived growth factor receptor beta [Source:ZFIN;Acc:ZDB-GENE-030805-2]
LOC101487343	LOC101487343		NC_036781.1	23699337	23701884	NA	NA	NA	NA
LOC112436389	LOC112436389	uncharacterized LOC112436389	NC_036781.1	23777940	23787865	TF335971	CD2	CD2 molecule [Source:HGNC Symbol;Acc:1639]	NA
LOC101464849	LOC101464849	uncharacterized LOC101464849	NC_036781.1	23877333	23883505	TF343910	NA	NA	Uncharacterized protein [Source:UniProtKB/TrEMBL;Acc:F1QIC8]
LOC101468275	LOC101468275	FERM and PDZ domain-containing protein 1%2C transcript variant X1	NC_036781.1	23934125	23958424	TF316497	FRMPD1	FERM and PDZ domain containing 1 [Source:HGNC Symbol;Acc:29159]	FERM and PDZ domain containing 1 [Source:HGNC Symbol;Acc:29159]
LOC101469444	slc25a51	solute carrier family 25 member 51%2C transcript variant X2	NC_036781.1	23959474	23964495	TF314192	SLC25A51	solute carrier family 25, member 51 [Source:HGNC Symbol;Acc:23323]	Uncharacterized protein [Source:UniProtKB/TrEMBL;Acc:E7F6T6]
LOC101471446	dele1	DAP3 binding cell death enhancer 1	NC_036781.1	24084002	24089919	TF329996	KIAA0141	KIAA0141 [Source:HGNC Symbol;Acc:28969]	NA
LOC101472209	LOC101472209	protein bicaudal C homolog 1-B	NC_036781.1	24093761	24103235	TF323767	BICC1	bicaudal C homolog 1 (Drosophila) [Source:HGNC Symbol;Acc:19351]	bicaudal C homolog 2 [Source:ZFIN;Acc:ZDB-GENE-110110-3]
LOC101471737	spock1	SPARC (osteonectin)%2C cwcv and kazal like domains proteoglycan 1%2C transcript variant X1	NC_036781.1	24107156	24224369	TF317779	SPOCK1	sparc/osteonectin, cwcv and kazal-like domains proteoglycan (testican) 1 [Source:HGNC Symbol;Acc:11251]	sparc/osteonectin, cwcv and kazal-like domains proteoglycan (testican) 1 [Source:HGNC Symbol;Acc:11251]
LOC101472514	etf1	eukaryotic translation termination factor 1	NC_036781.1	24442952	24450080	TF105672	ETF1	eukaryotic translation termination factor 1 [Source:HGNC Symbol;Acc:3477]	eukaryotic translation termination factor 1 [Source:ZFIN;Acc:ZDB-GENE-021029-1]
LOC112435870	LOC112435870	uncharacterized LOC112435870	NC_036781.1	24472650	24517584	NA	NA	NA	NA
LOC101474376	LOC101474376	protocadherin beta-15%2C transcript variant X1	NC_036781.1	24518337	24525047	TF332299	PCDHAC2	protocadherin alpha subfamily C, 2 [Source:HGNC Symbol;Acc:8677]	Uncharacterized protein [Source:UniProtKB/TrEMBL;Acc:E7F647]
LOC101481808	LOC101481808	protocadherin alpha-C2-like	NC_036781.1	24530031	24535724	TF332299	PCDHA13	protocadherin alpha 13 [Source:HGNC Symbol;Acc:8667]	Uncharacterized protein [Source:UniProtKB/TrEMBL;Acc:E7FAU6]
LOC101487526	LOC101487526	protocadherin alpha-3-like	NC_036781.1	24680636	24683136	TF332299	PCDHA13	protocadherin alpha 13 [Source:HGNC Symbol;Acc:8667]	protocadherin 2 alpha b 5 [Source:ZFIN;Acc:ZDB-GENE-041118-4]
LOC105940793	LOC105940793	protocadherin gamma-A11	NC_036781.1	24837645	25080196	TF332299	PCDHAC1	protocadherin alpha subfamily C, 1 [Source:HGNC Symbol;Acc:8676]	Uncharacterized protein [Source:UniProtKB/TrEMBL;Acc:F1Q862]
LOC101475419	diaph1	diaphanous related formin 1%2C transcript variant X1	NC_036781.1	25096977	25199633	TF315383	DIAPH1	diaphanous homolog 1 (Drosophila) [Source:HGNC Symbol;Acc:2876]	diaphanous homolog 2 (Drosophila) [Source:ZFIN;Acc:ZDB-GENE-090115-1]
LOC101476504	dock2	dedicator of cytokinesis 2	NC_036781.1	25324815	25426432	TF300423	DOCK2	dedicator of cytokinesis 2 [Source:HGNC Symbol;Acc:2988]	Uncharacterized protein [Source:UniProtKB/TrEMBL;Acc:E7F9Q7]
LOC101477529	kcnip1	potassium voltage-gated channel interacting protein 1%2C transcript variant X2	NC_036781.1	25467771	25513379	TF318560	KCNIP1	Kv channel interacting protein 1 [Source:HGNC Symbol;Acc:15521]	Kv channel interacting protein 1 a [Source:ZFIN;Acc:ZDB-GENE-080721-17]
LOC101480635	LOC101480635	zinc-binding protein A33	NC_036781.1	25650653	25656886	TF342569	TRIM69	tripartite motif containing 69 [Source:HGNC Symbol;Acc:17857]	tripartite motif containing 105 [Source:ZFIN;Acc:ZDB-GENE-060810-140]
LOC101481420	LOC101481420	calcium-binding protein 2%2C transcript variant X2	NC_036781.1	25671192	25683667	TF334804	CABP2	calcium binding protein 2 [Source:HGNC Symbol;Acc:1385]	si:ch211-113d11.4 [Source:ZFIN;Acc:ZDB-GENE-081028-55]
LOC101464956	slc43a1	solute carrier family 43 member 1%2C transcript variant X2	NC_036781.1	25835383	25856962	TF328358	SLC43A1	solute carrier family 43, member 1 [Source:HGNC Symbol;Acc:9225]	solute carrier family 43, member 1a [Source:ZFIN;Acc:ZDB-GENE-030131-6327]
LOC111501419	trnaf-gaa	tRNA-Phe	NC_036781.1	26025225	26025298	NA	NA	NA	NA
LOC101469903	LOC101469903	E3 ubiquitin-protein ligase RNF38	NC_036781.1	26057951	26073047	TF325756	RNF38	ring finger protein 38 [Source:HGNC Symbol;Acc:18052]	ring finger protein 38 [Source:HGNC Symbol;Acc:18052]
LOC101471829	LOC101471829	uncharacterized LOC101471829	NC_036781.1	26211969	26216066	TF342762	NA	NA	uncharacterized protein LOC568697 [Source:RefSeq peptide;Acc:NP_001185793]
LOC101472304	polr2g	RNA polymerase II subunit G	NC_036781.1	26216203	26220547	TF103042	POLR2G	polymerase (RNA) II (DNA directed) polypeptide G [Source:HGNC Symbol;Acc:9194]	polymerase (RNA) II (DNA directed) polypeptide G-like [Source:ZFIN;Acc:ZDB-GENE-030131-2808]	None	NANoHomolog
LOC101472615	eef1g	eukaryotic translation elongation factor 1 gamma	NC_036781.1	26220701	26228314	TF314343	EEF1G	eukaryotic translation elongation factor 1 gamma [Source:HGNC Symbol;Acc:3213]	eukaryotic translation elongation factor 1 gamma [Source:ZFIN;Acc:ZDB-GENE-020423-3]
LOC101472898	LOC101472898	kelch-like protein 4%2C transcript variant X1	NC_036781.1	26281194	26306802	TF329218	KLHL4	kelch-like family member 4 [Source:HGNC Symbol;Acc:6355]	kelch-like family member 4 [Source:HGNC Symbol;Acc:6355]
LOC101473199	LOC101473199	protocadherin-11 X-linked%2C transcript variant X1	NC_036781.1	26403466	26542020	TF320624	PCDH11X	protocadherin 11 X-linked [Source:HGNC Symbol;Acc:8656]	Uncharacterized protein [Source:UniProtKB/TrEMBL;Acc:E7FD60]
LOC101473669	LOC101473669	TSC22 domain family protein 3%2C transcript variant X1	NC_036781.1	26901132	26933552	TF329224	TSC22D3	TSC22 domain family, member 3 [Source:HGNC Symbol;Acc:3051]	TSC22 domain family, member 3 [Source:ZFIN;Acc:ZDB-GENE-040426-1433]
LOC101473971	LOC101473971	probable E3 ubiquitin-protein ligase MID2%2C transcript variant X1	NC_036781.1	26955681	27128767	TF333654	MID2	midline 2 [Source:HGNC Symbol;Acc:7096]	midline 2 [Source:ZFIN;Acc:ZDB-GENE-090220-1]
LOC101476585	LOC101476585	LRRN4 C-terminal-like protein	NC_036781.1	27250563	27252513	TF351118	LRRN4	leucine rich repeat neuronal 4 [Source:HGNC Symbol;Acc:16208]	NA
LOC101477437	LOC101477437	type 2 DNA topoisomerase 6 subunit B-like%2C transcript variant X1	NC_036781.1	27271206	27281755	TF337039	C11orf80	chromosome 11 open reading frame 80 [Source:HGNC Symbol;Acc:26197]	NA	None	NANoHomolog
LOC101477715	pola2	DNA polymerase alpha 2%2C accessory subunit	NC_036781.1	27282685	27288967	TF314249	POLA2	polymerase (DNA directed), alpha 2, accessory subunit [Source:HGNC Symbol;Acc:30073]	polymerase (DNA directed), alpha 2 [Source:ZFIN;Acc:ZDB-GENE-030131-778]
LOC101479509	LOC101479509	high-affinity choline transporter 1	NC_036781.1	27332236	27363930	TF314588	SLC5A7	solute carrier family 5 (choline transporter), member 7 [Source:HGNC Symbol;Acc:14025]	solute carrier family 5 (choline transporter), member 7 [Source:HGNC Symbol;Acc:14025]
LOC101482200	LOC101482200	EH domain-containing protein 1	NC_036781.1	27392231	27406203	TF314429	EHD1	EH-domain containing 1 [Source:HGNC Symbol;Acc:3242]	EH-domain containing 1b [Source:ZFIN;Acc:ZDB-GENE-030131-2069]
LOC101485692	LOC101485692	girdin	NC_036781.1	27505137	27563127	TF320231	CCDC88B	coiled-coil domain containing 88B [Source:HGNC Symbol;Acc:26757]	coiled-coil domain containing 88B [Source:ZFIN;Acc:ZDB-GENE-080303-31]
LOC101486279	macrod1	MACRO domain containing 1%2C transcript variant X2	NC_036781.1	27584852	27729755	TF341440	MACROD2	MACRO domain containing 2 [Source:HGNC Symbol;Acc:16126]	MACRO domain containing 1 [Source:ZFIN;Acc:ZDB-GENE-040912-100]
LOC111501413	trnaw-cca	tRNA-Trp	NC_036781.1	27733178	27733249	NA	NA	NA	NA
LOC101465525	atg2a	autophagy related 2A	NC_036781.1	27794633	27823141	TF313482	ATG2A	autophagy related 2A [Source:HGNC Symbol;Acc:29028]	NA
LOC112436168	LOC112436168	protein NYNRIN-like	NC_036781.1	27980694	27984406	TF352305	NA	NA	NA
LOC101475513	efemp2	EGF containing fibulin extracellular matrix protein 2	NC_036781.1	28218163	28229777	TF317514	EFEMP2	EGF containing fibulin-like extracellular matrix protein 2 [Source:HGNC Symbol;Acc:3219]	EGF-containing fibulin-like extracellular matrix protein 2a [Source:ZFIN;Acc:ZDB-GENE-041212-8]
LOC111501423	trnak-cuu	tRNA-Lys	NC_036781.1	28230774	28230846	NA	NA	NA	NA
LOC101476964	mrpl11	mitochondrial ribosomal protein L11	NC_036781.1	28265360	28327389	TF313471	MRPL11	mitochondrial ribosomal protein L11 [Source:HGNC Symbol;Acc:14042]	mitochondrial ribosomal protein L11 [Source:ZFIN;Acc:ZDB-GENE-040718-294]
LOC101470485	LOC101470485	uncharacterized LOC101470485	NC_036781.1	28329341	28347186	TF324055	SNX19	sorting nexin 19 [Source:HGNC Symbol;Acc:21532]	Uncharacterized protein [Source:UniProtKB/TrEMBL;Acc:E7F2X4]
LOC101480847	tex11	testis expressed 11%2C transcript variant X2	NC_036781.1	28465335	28477069	TF333356	TEX11	testis expressed 11 [Source:HGNC Symbol;Acc:11733]	testis expressed 11 [Source:HGNC Symbol;Acc:11733]
LOC101479027	dlg3	discs large MAGUK scaffold protein 3%2C transcript variant X1	NC_036781.1	28477072	28558390	TF323171	DLG3	discs, large homolog 3 (Drosophila) [Source:HGNC Symbol;Acc:2902]	discs, large homolog 3 (Drosophila) [Source:ZFIN;Acc:ZDB-GENE-050208-93]
LOC101484941	LOC101484941	phosphatidylinositol 3%2C4%2C5-trisphosphate 5-phosphatase 2B%2C transcript variant X1	NC_036781.1	28609999	28627569	TF323475	INPPL1	inositol polyphosphate phosphatase-like 1 [Source:HGNC Symbol;Acc:6080]	inositol polyphosphate phosphatase-like 1b [Source:ZFIN;Acc:ZDB-GENE-030616-75]
LOC101485414	LOC101485414	transcription factor Sox-3	NC_036781.1	28653621	28655628	TF351735	SOX3	SRY (sex determining region Y)-box 3 [Source:HGNC Symbol;Acc:11199]	SRY-box containing gene 3 [Source:ZFIN;Acc:ZDB-GENE-980526-333]
LOC101485693	atp11c	ATPase phospholipid transporting 11C	NC_036781.1	28707355	28748684	TF326897	ATP11C	ATPase, class VI, type 11C [Source:HGNC Symbol;Acc:13554]	ATPase, Class VI, type 11C [Source:ZFIN;Acc:ZDB-GENE-030616-51]
LOC101464105	fgf13	fibroblast growth factor 13%2C transcript variant X2	NC_036781.1	28793436	28892502	TF330751	FGF12	fibroblast growth factor 12 [Source:HGNC Symbol;Acc:3668]	fibroblast growth factor 12a [Source:ZFIN;Acc:ZDB-GENE-050221-6]
LOC101465244	LOC101465244	zinc finger protein ZIC 4	NC_036781.1	29010542	29016073	TF351425	ZIC1	Zic family member 1 [Source:HGNC Symbol;Acc:12872]	zic family member 6 [Source:ZFIN;Acc:ZDB-GENE-061207-1]
LOC101464958	zic3	Zic family member 3	NC_036781.1	29023315	29028481	TF351425	ZIC3	Zic family member 3 [Source:HGNC Symbol;Acc:12874]	zic family member 3 heterotaxy 1 (odd-paired homolog, Drosophila) [Source:ZFIN;Acc:ZDB-GENE-030708-2]
LOC101467349	arhgef6	Rac/Cdc42 guanine nucleotide exchange factor 6%2C transcript variant X1	NC_036781.1	29114279	29141379	TF316105	ARHGEF6	Rac/Cdc42 guanine nucleotide exchange factor (GEF) 6 [Source:HGNC Symbol;Acc:685]	Rac/Cdc42 guanine nucleotide exchange factor (GEF) 6 [Source:ZFIN;Acc:ZDB-GENE-101013-2]
LOC101471053	LOC101471053	pinopsin-like	NC_036781.1	29146178	29151531	TF324998	OPN3	opsin 3 [Source:HGNC Symbol;Acc:14007]	Uncharacterized protein [Source:UniProtKB/TrEMBL;Acc:F1QPE1]
LOC101472307	taf7l	TATA-box binding protein associated factor 7 like	NC_036781.1	29241786	29251729	TF313044	TAF7	TAF7 RNA polymerase II, TATA box binding protein (TBP)-associated factor, 55kDa [Source:HGNC Symbol;Acc:11541]	TAF7 RNA polymerase II, TATA box binding protein (TBP)-associated factor [Source:ZFIN;Acc:ZDB-GENE-020419-18]
LOC101471637	drp2	dystrophin related protein 2%2C transcript variant X1	NC_036781.1	29267995	29443755	TF320178	DMD	dystrophin [Source:HGNC Symbol;Acc:2928]	NA
LOC101473090	cenpi	centromere protein I%2C transcript variant X1	NC_036781.1	29445158	29461558	TF101137	CENPI	centromere protein I [Source:HGNC Symbol;Acc:3968]	centromere protein I [Source:ZFIN;Acc:ZDB-GENE-060810-127]
LOC101484113	tmem255a	transmembrane protein 255A%2C transcript variant X1	NC_036781.1	29950077	29968560	TF331034	TMEM255A	transmembrane protein 255A [Source:HGNC Symbol;Acc:26086]	transmembrane protein 255A [Source:HGNC Symbol;Acc:26086]
LOC101488085	ube2a	ubiquitin conjugating enzyme E2 A%2C transcript variant X1	NC_036781.1	30037271	30040842	TF101128	UBE2A	ubiquitin-conjugating enzyme E2A [Source:HGNC Symbol;Acc:12472]	ubiquitin-conjugating enzyme E2A (RAD6 homolog) [Source:ZFIN;Acc:ZDB-GENE-030616-72]
LOC111501415	trnae-uuc	tRNA-Glu	NC_036781.1	30041479	30041550	NA	NA	NA	NA
LOC101463801	LOC101463801	ETS-related transcription factor Elf-1%2C transcript variant X3	NC_036781.1	30041766	30082848	TF318679	ELF4	E74-like factor 4 (ets domain transcription factor) [Source:HGNC Symbol;Acc:3319]	ETS-related factor1 [Source:ZFIN;Acc:ZDB-GENE-980526-335]
LOC101472516	tnmd	tenomodulin	NC_036781.1	30088390	30155137	TF329712	TNMD	tenomodulin [Source:HGNC Symbol;Acc:17757]	tenomodulin [Source:ZFIN;Acc:ZDB-GENE-080220-31]
LOC101465245	pcdh19	protocadherin 19%2C transcript variant X1	NC_036781.1	30302639	30355181	TF352008	PCDH19	protocadherin 19 [Source:HGNC Symbol;Acc:14270]	protocadherin 19 [Source:ZFIN;Acc:ZDB-GENE-030131-4218]
LOC112436110	LOC112436110	uncharacterized LOC112436110	NC_036781.1	30361590	30362195	NA	NA	NA	NA
LOC101472795	diaph2	diaphanous related formin 2%2C transcript variant X1	NC_036781.1	30503316	30866559	TF315383	DIAPH2	diaphanous homolog 2 (Drosophila) [Source:HGNC Symbol;Acc:2877]	diaphanous homolog 2 (Drosophila) [Source:ZFIN;Acc:ZDB-GENE-090115-1]
LOC101470378	LOC101470378	E3 ubiquitin-protein ligase TRIM68%2C transcript variant X1	NC_036781.1	31078538	31081332	TF351086	TRIM25	tripartite motif containing 25 [Source:HGNC Symbol;Acc:12932]	bloodthirsty-related gene family, member 9 [Source:ZFIN;Acc:ZDB-GENE-080722-46]
LOC101473670	enox2	ecto-NOX disulfide-thiol exchanger 2%2C transcript variant X6	NC_036781.1	31247467	31436348	TF323802	ENOX2	ecto-NOX disulfide-thiol exchanger 2 [Source:HGNC Symbol;Acc:2259]	Uncharacterized protein [Source:UniProtKB/TrEMBL;Acc:E7EZB6]
LOC101469618	LOC101469618	multidrug resistance-associated protein 5%2C transcript variant X1	NC_036781.1	31451505	31484619	TF352085	ABCC11	ATP-binding cassette, sub-family C (CFTR/MRP), member 11 [Source:HGNC Symbol;Acc:14639]	NA
LOC101473973	LOC101473973	sodium bicarbonate transporter-like protein 11%2C transcript variant X1	NC_036781.1	31705386	31731178	TF313630	SLC4A11	solute carrier family 4, sodium borate transporter, member 11 [Source:HGNC Symbol;Acc:16438]	solute carrier family 4, sodium borate transporter, member 11 [Source:ZFIN;Acc:ZDB-GENE-090313-183]
LOC101470683	LOC101470683	GDNF family receptor alpha-4%2C transcript variant X1	NC_036781.1	31750778	31807585	TF331647	GFRA4	GDNF family receptor alpha 4 [Source:HGNC Symbol;Acc:13821]	Uncharacterized protein [Source:UniProtKB/TrEMBL;Acc:E7F0C7]
LOC101472211	bend4	BEN domain containing 4	NC_036781.1	31871569	31882054	TF332060	BEND4	BEN domain containing 4 [Source:HGNC Symbol;Acc:23815]	BEN domain containing 4 [Source:HGNC Symbol;Acc:23815]
LOC101472515	shisa3	shisa family member 3%2C transcript variant X1	NC_036781.1	31882580	31885652	TF330800	SHISA3	shisa homolog 3 (Xenopus laevis) [Source:HGNC Symbol;Acc:25159]	shisa homolog 3 (Xenopus laevis) [Source:ZFIN;Acc:ZDB-GENE-070112-2022]
LOC101472900	atp8a1	ATPase phospholipid transporting 8A1%2C transcript variant X2	NC_036781.1	31887679	32002556	TF300654	ATP8A1	ATPase, aminophospholipid transporter (APLT), class I, type 8A, member 1 [Source:HGNC Symbol;Acc:13531]	ATPase, aminophospholipid transporter-like, class I, type 8A, member 2 [Source:ZFIN;Acc:ZDB-GENE-100209-2]
LOC101475421	hs3st1	heparan sulfate-glucosamine 3-sulfotransferase 1	NC_036781.1	32127428	32129989	TF350755	HS3ST1	heparan sulfate (glucosamine) 3-O-sulfotransferase 1 [Source:HGNC Symbol;Acc:5194]	heparan sulfate (glucosamine) 3-O-sulfotransferase 1 [Source:ZFIN;Acc:ZDB-GENE-070202-1]
LOC101475721	rab28	RAB28%2C member RAS oncogene family%2C transcript variant X2	NC_036781.1	32358899	32394799	TF313852	RAB28	RAB28, member RAS oncogene family [Source:HGNC Symbol;Acc:9768]	NA
LOC101477250	LOC101477250	biorientation of chromosomes in cell division protein 1-like 1	NC_036781.1	32420154	32435807	TF325311	BOD1	biorientation of chromosomes in cell division 1 [Source:HGNC Symbol;Acc:25114]	biorientation of chromosomes in cell division 1 [Source:ZFIN;Acc:ZDB-GENE-060810-163]
LOC101488119	LOC101488119	uncharacterized LOC101488119	NC_036782.1	528728	535677	TF323194	USP53	ubiquitin specific peptidase 53 [Source:HGNC Symbol;Acc:29255]	ubiquitin specific peptidase 54 [Source:HGNC Symbol;Acc:23513]
LOC112431476	LOC112431476	chymotrypsin-like protease CTRL-1	NC_036782.1	720243	723503	TF351676	TPSG1	tryptase gamma 1 [Source:HGNC Symbol;Acc:14134]	zgc:123295 [Source:ZFIN;Acc:ZDB-GENE-051127-11]
LOC101482428	LOC101482428	coxsackievirus and adenovirus receptor-like	NC_036782.1	1100376	1109784	TF331728	SCN2B	sodium channel, voltage-gated, type II, beta subunit [Source:HGNC Symbol;Acc:10589]	sodium channel, voltage-gated, type II, beta [Source:ZFIN;Acc:ZDB-GENE-070920-1]
LOC112436627	LOC112436627	uncharacterized LOC112436627	NC_036782.1	1113133	1113733	NA	NA	NA	NA
LOC112431512	LOC112431512		NC_036782.1	1130818	1132965	NA	NA	NA	NA
LOC112431521	LOC112431521	L-amino-acid oxidase-like	NC_036782.1	1492176	1527965	TF313314	IL4I1	interleukin 4 induced 1 [Source:HGNC Symbol;Acc:19094]	interleukin 4 induced 1 [Source:HGNC Symbol;Acc:19094]
LOC112431528	LOC112431528	L-amino-acid oxidase-like	NC_036782.1	1529063	1533657	TF313314	IL4I1	interleukin 4 induced 1 [Source:HGNC Symbol;Acc:19094]	interleukin 4 induced 1 [Source:HGNC Symbol;Acc:19094]
LOC106674766	LOC106674766	ladderlectin-like	NC_036782.1	1890073	1892039	TF333341	CD207	CD207 molecule, langerin [Source:HGNC Symbol;Acc:17935]	si:ch211-125e6.5 [Source:ZFIN;Acc:ZDB-GENE-070912-39]
LOC101466519	LOC101466519	uncharacterized LOC101466519	NC_036782.1	1931262	1937988	TF333341	CD207	CD207 molecule, langerin [Source:HGNC Symbol;Acc:17935]	si:ch211-125e6.5 [Source:ZFIN;Acc:ZDB-GENE-070912-39]
LOC101468176	LOC101468176	neuropeptide Y receptor type 2%2C transcript variant X1	NC_036782.1	2047767	2129423	TF315303	NPY2R	neuropeptide Y receptor Y2 [Source:HGNC Symbol;Acc:7957]	neuropeptide Y receptor Y2 [Source:HGNC Symbol;Acc:7957]
LOC101468664	rbm46	RNA binding motif protein 46%2C transcript variant X1	NC_036782.1	2325666	2357822	TF314932	RBM46	RNA binding motif protein 46 [Source:HGNC Symbol;Acc:28401]	RNA binding motif protein 46 [Source:ZFIN;Acc:ZDB-GENE-061013-298]
LOC101469269	LOC101469269	lecithin retinol acyltransferase	NC_036782.1	2363816	2368950	TF330836	LRAT	lecithin retinol acyltransferase (phosphatidylcholine--retinol O-acyltransferase) [Source:HGNC Symbol;Acc:6685]	zgc:194355 [Source:ZFIN;Acc:ZDB-GENE-081022-106]
LOC112433223	LOC112433223	uncharacterized LOC112433223	NC_036782.1	2655961	2657110	NA	NA	NA	NA
LOC101470311	cfi	complement factor I	NC_036782.1	2856140	2872156	TF330647	CFI	complement factor I [Source:HGNC Symbol;Acc:5394]	complement factor I [Source:HGNC Symbol;Acc:5394]
LOC105940517	LOC105940517	uncharacterized LOC105940517	NC_036782.1	2869789	2891339	NA	NA	NA	NA
LOC101471562	LOC101471562	phosphatidylcholine:ceramide cholinephosphotransferase 2%2C transcript variant X1	NC_036782.1	2925925	2934527	TF314547	SGMS2	sphingomyelin synthase 2 [Source:HGNC Symbol;Acc:28395]	sphingomyelin synthase 2 [Source:HGNC Symbol;Acc:28395]
LOC101472434	LOC101472434	transcription factor 7-like 2	NC_036782.1	2935606	2938914	TF318448	LEF1	lymphoid enhancer-binding factor 1 [Source:HGNC Symbol;Acc:6551]	lymphocyte enhancer binding factor 1 [Source:ZFIN;Acc:ZDB-GENE-990714-26]
LOC101472730	LOC101472730	zinc finger and SCAN domain-containing protein 2%2C transcript variant X1	NC_036782.1	2940323	2963027	TF341817	ZNF470	zinc finger protein 470 [Source:HGNC Symbol;Acc:22220]	si:dkey-4c15.18 [Source:ZFIN;Acc:ZDB-GENE-050420-350]
LOC101475441	LOC101475441	steroid 17-alpha-hydroxylase/17%2C20 lyase%2C transcript variant X1	NC_036782.1	3095788	3106574	TF105095	CYP17A1	cytochrome P450, family 17, subfamily A, polypeptide 1 [Source:HGNC Symbol;Acc:2593]	cytochrome P450, family 17, subfamily A, polypeptide 2 [Source:ZFIN;Acc:ZDB-GENE-100822-1]
LOC101475941	LOC101475941	mucin-5AC	NC_036782.1	3106651	3124963	TF330726	WBP1	WW domain binding protein 1 [Source:HGNC Symbol;Acc:12737]	WW domain binding protein 1 [Source:HGNC Symbol;Acc:12737]
LOC112432471	LOC112432471	zinc finger protein 98-like	NC_036782.1	3464578	3466744	TF350794	ZNF208	zinc finger protein 208 [Source:HGNC Symbol;Acc:12999]	NA
LOC112432467	LOC112432467	zinc finger protein 665-like	NC_036782.1	3601269	3603305	TF326846	CantFind	CantFind	CantFind
LOC112432558	LOC112432558	uncharacterized LOC112432558%2C transcript variant X2	NC_036782.1	3648808	3650423	NA	NA	NA	NA
LOC112431645	LOC112431645	zinc finger protein 70-like	NC_036782.1	3671988	3672836	TF341817	ZNF470	zinc finger protein 470 [Source:HGNC Symbol;Acc:22220]	zgc:171220 [Source:ZFIN;Acc:ZDB-GENE-071004-11]
LOC112432531	LOC112432531	uncharacterized LOC112432531	NC_036782.1	3672862	3684017	NA	NA	NA	NA
LOC112432525	LOC112432525		NC_036782.1	3711689	3712407	NA	NA	NA	NA
LOC112431646	LOC112431646	zinc finger protein 665-like	NC_036782.1	3712513	3735319	TF350794	ZNF208	zinc finger protein 208 [Source:HGNC Symbol;Acc:12999]	NA
LOC101467700	LOC101467700	low affinity immunoglobulin gamma Fc region receptor II	NC_036782.1	3972356	3982239	NA	NA	NA	NA
LOC101468199	LOC101468199	uncharacterized LOC101468199	NC_036782.1	4015225	4022457	TF335097	FCRLA	Fc receptor-like A [Source:HGNC Symbol;Acc:18504]	zgc:154125 [Source:ZFIN;Acc:ZDB-GENE-061013-717]
LOC112431374	LOC112431374	nuclear factor 7%2C brain-like	NC_036782.1	4126286	4128002	TF334286	TRIM35	tripartite motif containing 35 [Source:HGNC Symbol;Acc:16285]	tripartite motif containing 35-29 [Source:ZFIN;Acc:ZDB-GENE-041114-35]
LOC112431352	LOC112431352	nuclear factor 7%2C ovary-like	NC_036782.1	4618738	4620544	TF334286	TRIM35	tripartite motif containing 35 [Source:HGNC Symbol;Acc:16285]	tripartite motif containing 35-29 [Source:ZFIN;Acc:ZDB-GENE-041114-35]
LOC112431706	LOC112431706	nuclear factor 7%2C brain-like	NC_036782.1	4680536	4682173	TF334286	TRIM35	tripartite motif containing 35 [Source:HGNC Symbol;Acc:16285]	tripartite motif containing 35-29 [Source:ZFIN;Acc:ZDB-GENE-041114-35]
LOC112431729	LOC112431729	tripartite motif-containing protein 35-like	NC_036782.1	4827636	4829033	TF334286	TRIM35	tripartite motif containing 35 [Source:HGNC Symbol;Acc:16285]	tripartite motif containing 35-29 [Source:ZFIN;Acc:ZDB-GENE-041114-35]
LOC101483482	LOC101483482	serrate RNA effector molecule homolog	NC_036782.1	4852090	4862582	TF317609	SRRT	serrate RNA effector molecule homolog (Arabidopsis) [Source:HGNC Symbol;Acc:24101]	serrate RNA effector molecule homolog (Arabidopsis) [Source:ZFIN;Acc:ZDB-GENE-020419-13]
LOC106675924	LOC106675924	E3 ubiquitin-protein ligase TRIM17	NC_036782.1	5090538	5116512	TF334286	TRIM35	tripartite motif containing 35 [Source:HGNC Symbol;Acc:16285]	tripartite motif containing 35-29 [Source:ZFIN;Acc:ZDB-GENE-041114-35]
LOC112431751	LOC112431751	Fc receptor-like B	NC_036782.1	5251684	5261044	TF335097	FCRLA	Fc receptor-like A [Source:HGNC Symbol;Acc:18504]	zgc:154125 [Source:ZFIN;Acc:ZDB-GENE-061013-717]
LOC101485060	LOC101485060	programmed cell death 1 ligand 1%2C transcript variant X2	NC_036782.1	5495941	5498725	TF331083	HHLA2	HERV-H LTR-associating 2 [Source:HGNC Symbol;Acc:4905]	HERV-H LTR-associating 2 [Source:HGNC Symbol;Acc:4905]
LOC112432780	LOC112432780	alpha-2%2C8-sialyltransferase 8F-like	NC_036782.1	5543412	5556085	TF323961	ST8SIA5	ST8 alpha-N-acetyl-neuraminide alpha-2,8-sialyltransferase 5 [Source:HGNC Symbol;Acc:17827]	ST8 alpha-N-acetyl-neuraminide alpha-2,8-sialyltransferase 6 [Source:ZFIN;Acc:ZDB-GENE-060322-9]
LOC106676162	LOC106676162	V-set domain-containing T-cell activation inhibitor 1-like	NC_036782.1	5754298	5756974	TF331083	BTN1A1	butyrophilin, subfamily 1, member A1 [Source:HGNC Symbol;Acc:1135]	si:ch73-137d22.1 [Source:ZFIN;Acc:ZDB-GENE-091116-52]
LOC101483770	LOC101483770	selection and upkeep of intraepithelial T-cells protein 1	NC_036782.1	5784064	5786235	TF331083	BTN1A1	butyrophilin, subfamily 1, member A1 [Source:HGNC Symbol;Acc:1135]	si:ch73-137d22.1 [Source:ZFIN;Acc:ZDB-GENE-091116-52]
LOC112431824	LOC112431824	uncharacterized LOC112431824	NC_036782.1	5915271	5928896	TF335097	FCRLA	Fc receptor-like A [Source:HGNC Symbol;Acc:18504]	zgc:154125 [Source:ZFIN;Acc:ZDB-GENE-061013-717]
LOC112430640	LOC112430640	low affinity immunoglobulin gamma Fc region receptor II-like	NC_036782.1	5995980	6000093	TF335097	FCRLA	Fc receptor-like A [Source:HGNC Symbol;Acc:18504]	zgc:154125 [Source:ZFIN;Acc:ZDB-GENE-061013-717]
LOC106675137	LOC106675137	uncharacterized LOC106675137	NC_036782.1	6208719	6227653	TF353362	NA	NA	Uncharacterized protein [Source:UniProtKB/TrEMBL;Acc:F1R1C6]
LOC112430646	LOC112430646	butyrophilin subfamily 3 member A2-like	NC_036782.1	6658564	6663050	TF331083	BTN1A1	butyrophilin, subfamily 1, member A1 [Source:HGNC Symbol;Acc:1135]	si:ch73-137d22.1 [Source:ZFIN;Acc:ZDB-GENE-091116-52]
LOC106676521	LOC106676521	CD276 antigen-like	NC_036782.1	7020169	7033384	TF331083	BTN1A1	butyrophilin, subfamily 1, member A1 [Source:HGNC Symbol;Acc:1135]	si:ch73-137d22.1 [Source:ZFIN;Acc:ZDB-GENE-091116-52]
LOC112431088	LOC112431088	uncharacterized LOC112431088	NC_036782.1	7600551	7601217	NA	NA	NA	NA
LOC112432150	LOC112432150	ladderlectin-like%2C transcript variant X1	NC_036782.1	7631807	7635013	TF333341	CD207	CD207 molecule, langerin [Source:HGNC Symbol;Acc:17935]	si:ch211-125e6.5 [Source:ZFIN;Acc:ZDB-GENE-070912-39]
LOC101470293	LOC101470293	complexin-2%2C transcript variant X1	NC_036782.1	8422161	8486542	TF315172	CPLX1	complexin 1 [Source:HGNC Symbol;Acc:2309]	complexin 1 [Source:HGNC Symbol;Acc:2309]
LOC112433124	LOC112433124	zinc finger protein 37 homolog	NC_036782.1	8560487	8568867	TF328277	NA	NA	zgc:162358 [Source:ZFIN;Acc:ZDB-GENE-070424-89]
LOC112433151	LOC112433151	tripartite motif-containing protein 16-like	NC_036782.1	8746950	8748915	TF351086	TRIM16	tripartite motif containing 16 [Source:HGNC Symbol;Acc:17241]	bloodthirsty-related gene family, member 19 [Source:ZFIN;Acc:ZDB-GENE-081031-50]
LOC112433144	LOC112433144	uncharacterized LOC112433144	NC_036782.1	8778865	8780220	TF352882	NA	NA	NA
LOC101480094	LOC101480094	polymeric immunoglobulin receptor	NC_036782.1	8989015	8998538	TF334441	PIGR	polymeric immunoglobulin receptor [Source:HGNC Symbol;Acc:8968]	polymeric immunoglobulin receptor [Source:ZFIN;Acc:ZDB-GENE-060503-327]
LOC106674619	LOC106674619		NC_036782.1	9018010	9019440	NA	NA	NA	NA
LOC112433245	LOC112433245	tripartite motif-containing protein 16-like	NC_036782.1	9161337	9163544	TF351086	TRIM16	tripartite motif containing 16 [Source:HGNC Symbol;Acc:17241]	bloodthirsty-related gene family, member 19 [Source:ZFIN;Acc:ZDB-GENE-081031-50]
LOC112429936	LOC112429936	tripartite motif-containing protein 16-like	NC_036782.1	9314589	9316532	TF351086	TRIM16	tripartite motif containing 16 [Source:HGNC Symbol;Acc:17241]	bloodthirsty-related gene family, member 19 [Source:ZFIN;Acc:ZDB-GENE-081031-50]
LOC112433533	LOC112433533	histone H1-like	NC_036782.1	9465250	9468990	TF313664	HIST1H1E	histone cluster 1, H1e [Source:HGNC Symbol;Acc:4718]	zgc:110425 [Source:ZFIN;Acc:ZDB-GENE-050522-103]
LOC101470688	LOC101470688	uncharacterized LOC101470688	NC_036782.1	9651163	9653962	TF352068	NA	NA	NA
LOC106675405	LOC106675405	uncharacterized LOC106675405	NC_036782.1	9659195	9661916	TF352068	NA	NA	NA
LOC105941375	LOC105941375	NLR family CARD domain-containing protein 3	NC_036782.1	9704405	9713846	TF352120	NA	NA	CantFind
LOC101472798	LOC101472798	uncharacterized LOC101472798	NC_036782.1	9736422	9741403	TF352068	NA	NA	NA
LOC101473094	LOC101473094	GRB2-associated-binding protein 1	NC_036782.1	9759186	9781876	TF329487	GAB1	GRB2-associated binding protein 1 [Source:HGNC Symbol;Acc:4066]	GRB2-associated binding protein 1 [Source:ZFIN;Acc:ZDB-GENE-040426-2674]
LOC112431514	LOC112431514	lipocalin-like	NC_036782.1	9877719	9879264	TF336103	C8G	complement component 8, gamma polypeptide [Source:HGNC Symbol;Acc:1354]	zgc:153704 [Source:ZFIN;Acc:ZDB-GENE-060929-1114]
LOC101473674	LOC101473674	short transient receptor potential channel 5	NC_036782.1	9983612	10180512	TF313147	TRPC5	transient receptor potential cation channel, subfamily C, member 5 [Source:HGNC Symbol;Acc:12337]	transient receptor potential cation channel, subfamily C, member 5a [Source:ZFIN;Acc:ZDB-GENE-040812-1]
LOC101478100	LOC101478100	dachshund homolog 2	NC_036782.1	10238267	10354980	TF316697	DACH2	dachshund homolog 2 (Drosophila) [Source:HGNC Symbol;Acc:16814]	dachshund b [Source:ZFIN;Acc:ZDB-GENE-020402-4]
LOC101478381	frmd7	FERM domain containing 7	NC_036782.1	10406528	10424079	TF317513	FRMD7	FERM domain containing 7 [Source:HGNC Symbol;Acc:8079]	FERM domain containing 7 [Source:HGNC Symbol;Acc:8079]
LOC101474463	stk26	serine/threonine kinase 26	NC_036782.1	10426500	10479052	TF354217	MST4_HUMAN	Serine/threonine-protein kinase MST4 [Source:UniProtKB/Swiss-Prot;Acc:Q9P289]	serine/threonine protein kinase MST4 [Source:ZFIN;Acc:ZDB-GENE-080516-5]
LOC101476207	LOC101476207	zinc finger protein 638	NC_036782.1	10810896	10839798	TF350229	MAP1B	microtubule-associated protein 1B [Source:HGNC Symbol;Acc:6836]	Hypothetical microtubule-associated protein 1b; Uncharacterized protein [Source:UniProtKB/TrEMBL;Acc:B2ZZ14]
LOC112430686	LOC112430686	transcription initiation factor TFIID subunit 12b-like	NC_036782.1	10839981	10848718	TF333921	ZNF638	zinc finger protein 638 [Source:HGNC Symbol;Acc:17894]	matrin 3-like 1.1 [Source:ZFIN;Acc:ZDB-GENE-030616-40]
LOC106675407	LOC106675407	uncharacterized LOC106675407%2C transcript variant X1	NC_036782.1	10852639	10912889	TF350229	MAP1B	microtubule-associated protein 1B [Source:HGNC Symbol;Acc:6836]	Hypothetical microtubule-associated protein 1b; Uncharacterized protein [Source:UniProtKB/TrEMBL;Acc:B2ZZ14]
LOC101466147	LOC101466147	uncharacterized LOC101466147%2C transcript variant X1	NC_036782.1	11028433	11077677	TF333921	ZNF638	zinc finger protein 638 [Source:HGNC Symbol;Acc:17894]	matrin 3-like 1.1 [Source:ZFIN;Acc:ZDB-GENE-030616-40]
LOC101471303	LOC101471303	cytochrome P450 26B1	NC_036782.1	11533668	11571349	TF105093	CYP26B1	cytochrome P450, family 26, subfamily B, polypeptide 1 [Source:HGNC Symbol;Acc:20581]	cytochrome P450, family 26, subfamily b, polypeptide 1 [Source:ZFIN;Acc:ZDB-GENE-030131-2908]
LOC101470638	dysf	dysferlin%2C transcript variant X2	NC_036782.1	11852873	11957953	TF316871	DYSF	dysferlin, limb girdle muscular dystrophy 2B (autosomal recessive) [Source:HGNC Symbol;Acc:3097]	dysferlin, limb girdle muscular dystrophy 2B (autosomal recessive) [Source:ZFIN;Acc:ZDB-GENE-070501-1]
LOC111500616	trnan-guu	tRNA-Asn	NC_036782.1	11965629	11965702	NA	NA	NA	NA
LOC101480322	adhfe1	alcohol dehydrogenase%2C iron containing 1%2C transcript variant X1	NC_036782.1	11967542	11978619	TF105710	ADHFE1	alcohol dehydrogenase, iron containing, 1 [Source:HGNC Symbol;Acc:16354]	alcohol dehydrogenase, iron containing, 1 [Source:ZFIN;Acc:ZDB-GENE-040426-2070]	None	NANoHomolog
LOC101477742	LOC101477742	myelin-oligodendrocyte glycoprotein-like%2C transcript variant X2	NC_036782.1	12204962	12218791	TF331083	BTN1A1	butyrophilin, subfamily 1, member A1 [Source:HGNC Symbol;Acc:1135]	si:ch73-137d22.1 [Source:ZFIN;Acc:ZDB-GENE-091116-52]
LOC105940501	LOC105940501	uncharacterized LOC105940501	NC_036782.1	12372518	12374597	NA	NA	NA	NA
LOC105940667	LOC105940667	collagen alpha-5(IV) chain	NC_036782.1	12836605	12893064	TF316865	CantFind	CantFind	CantFind
LOC101474290	nhsl2	NHS like 2%2C transcript variant X1	NC_036782.1	13038862	13239086	TF333323	NHSL2	NHS-like 2 [Source:HGNC Symbol;Acc:33737]	NHS-like 2 [Source:HGNC Symbol;Acc:33737]
LOC101475144	LOC101475144	rho GTPase-activating protein 6%2C transcript variant X2	NC_036782.1	13247203	13327833	TF316710	ARHGAP36	Rho GTPase activating protein 36 [Source:HGNC Symbol;Acc:26388]	zgc:136763 [Source:ZFIN;Acc:ZDB-GENE-060616-298]
LOC101477269	LOC101477269	phosphorylase b kinase regulatory subunit alpha%2C skeletal muscle isoform%2C transcript variant X1	NC_036782.1	13504078	13539136	TF313970	PHKA1	phosphorylase kinase, alpha 1 (muscle) [Source:HGNC Symbol;Acc:8925]	phosphorylase kinase, alpha 1 (muscle) [Source:HGNC Symbol;Acc:8925]
LOC101487162	LOC101487162	tumor necrosis factor ligand superfamily member 10	NC_036782.1	14018745	14091278	TF332169	TNFSF11	tumor necrosis factor (ligand) superfamily, member 11 [Source:HGNC Symbol;Acc:11926]	tumor necrosis factor (ligand) superfamily, member 10 like [Source:ZFIN;Acc:ZDB-GENE-010801-1]
LOC101470351	LOC101470351	5-hydroxytryptamine receptor 2A%2C transcript variant X1	NC_036782.1	14616403	14772625	TF316350	HTR2C	5-hydroxytryptamine (serotonin) receptor 2C, G protein-coupled [Source:HGNC Symbol;Acc:5295]	5-hydroxytryptamine (serotonin) receptor 2C, G protein-coupled-like 1 [Source:ZFIN;Acc:ZDB-GENE-081104-48]
LOC101469594	LOC101469594	G-protein coupled receptor 12	NC_036782.1	14853562	14862334	TF330052	GPR12	G protein-coupled receptor 12 [Source:HGNC Symbol;Acc:4466]	si:dkey-24g18.3 [Source:ZFIN;Acc:ZDB-GENE-081104-390]
LOC101468909	LOC101468909	diacylglycerol kinase delta%2C transcript variant X1	NC_036782.1	14909478	15000734	TF313104	DGKH	diacylglycerol kinase, eta [Source:HGNC Symbol;Acc:2854]	si:dkey-172j4.3 [Source:ZFIN;Acc:ZDB-GENE-081104-24]
LOC101482358	LOC101482358	cysteine and histidine-rich domain-containing protein 1	NC_036782.1	15002031	15012775	TF105394	ITGB1BP2	integrin beta 1 binding protein (melusin) 2 [Source:HGNC Symbol;Acc:6154]	integrin beta 1 binding protein (melusin) 2 [Source:HGNC Symbol;Acc:6154]
LOC111501023	LOC111501023	macrophage mannose receptor 1-like	NC_036782.1	15191063	15195180	TF334817	NA	NA	si:ch211-225k7.3 [Source:ZFIN;Acc:ZDB-GENE-060503-876]
LOC101482264	LOC101482264	E3 ubiquitin-protein ligase TRIM21-like	NC_036782.1	15214175	15221159	TF342569	TRIM6	tripartite motif containing 6 [Source:HGNC Symbol;Acc:16277]	TRIM39-RPP21 readthrough [Source:HGNC Symbol;Acc:38845]
LOC105940657	LOC105940657	proteoglycan 4	NC_036782.1	15223466	15257658	NoHit	NA	NA	NA
LOC112436448	LOC112436448	tripartite motif-containing protein 47-like	NC_036782.1	15263336	15272145	TF351086	TRIM25	tripartite motif containing 25 [Source:HGNC Symbol;Acc:12932]	Uncharacterized protein [Source:UniProtKB/TrEMBL;Acc:F1QG40]
LOC101480332	LOC101480332	zinc finger protein 219	NC_036782.1	15365114	15388810	TF332241	ZNF219	zinc finger protein 219 [Source:HGNC Symbol;Acc:13011]	zinc finger protein 219 [Source:HGNC Symbol;Acc:13011]
LOC101477218	LOC101477218	pleckstrin homology domain-containing family G member 4B%2C transcript variant X2	NC_036782.1	15401011	15446672	TF334329	ARHGEF40	Rho guanine nucleotide exchange factor (GEF) 40 [Source:HGNC Symbol;Acc:25516]	Rho guanine nucleotide exchange factor (GEF) 40 [Source:HGNC Symbol;Acc:25516]
LOC101476923	LOC101476923	uncharacterized LOC101476923	NC_036782.1	15456892	15462498	TF343744	NA	NA	uncharacterized protein LOC799904 precursor [Source:RefSeq peptide;Acc:NP_001077343]
LOC101476357	LOC101476357	uncharacterized LOC101476357	NC_036782.1	15564726	15571148	TF343744	NA	NA	uncharacterized protein LOC799904 precursor [Source:RefSeq peptide;Acc:NP_001077343]
LOC101479002	LOC101479002	uncharacterized LOC101479002%2C transcript variant X1	NC_036782.1	15591505	15606843	TF334681	APOLD1	apolipoprotein L domain containing 1 [Source:HGNC Symbol;Acc:25268]	apolipoprotein L domain containing 1 [Source:HGNC Symbol;Acc:25268]
LOC101478721	LOC101478721	protein NDRG2%2C transcript variant X1	NC_036782.1	15640035	15689397	TF313168	NDRG2	NDRG family member 2 [Source:HGNC Symbol;Acc:14460]	N-myc downstream regulated gene 2 [Source:ZFIN;Acc:ZDB-GENE-041212-15]
LOC101475184	LOC101475184	uncharacterized LOC101475184%2C transcript variant X1	NC_036782.1	15732737	15743002	NoHit	NA	NA	NA
LOC112434672	trnat-ugu	tRNA-Thr	NC_036782.1	15811961	15812034	NA	NA	NA	NA
LOC101474396	LOC101474396	prolyl-tRNA synthetase associated domain-containing protein 1-like	NC_036782.1	16108436	16109247	TF329697	NA	NA	NA
LOC112430749	LOC112430749	uncharacterized LOC112430749	NC_036782.1	16910866	16919721	TF335097	FCRLA	Fc receptor-like A [Source:HGNC Symbol;Acc:18504]	Uncharacterized protein [Source:UniProtKB/TrEMBL;Acc:F1QYZ3]
LOC101479518	actn3	actinin alpha 3	NC_036782.1	17639102	17675728	TF352676	ACTN2	actinin, alpha 2 [Source:HGNC Symbol;Acc:164]	actinin alpha 3b [Source:ZFIN;Acc:ZDB-GENE-030131-2040]
LOC101481033	rin1	Ras and Rab interactor 1	NC_036782.1	17806707	17851758	TF331067	RIN1	Ras and Rab interactor 1 [Source:HGNC Symbol;Acc:18749]	Uncharacterized protein [Source:UniProtKB/TrEMBL;Acc:E7EZC1]
LOC106676596	LOC106676596	uncharacterized LOC106676596	NC_036782.1	18416602	18418965	NoHit	NA	NA	NA
LOC101486213	LOC101486213	matrix metalloproteinase-14	NC_036782.1	18437070	18453948	TF352396	MMP14	matrix metallopeptidase 14 (membrane-inserted) [Source:HGNC Symbol;Acc:7160]	matrix metalloproteinase 14a (membrane-inserted) [Source:ZFIN;Acc:ZDB-GENE-030901-1]
LOC101480964	svep1	sushi%2C von Willebrand factor type A%2C EGF and pentraxin domain containing 1%2C transcript variant X1	NC_036782.1	18917056	19033263	TF342247	SVEP1	sushi, von Willebrand factor type A, EGF and pentraxin domain containing 1 [Source:HGNC Symbol;Acc:15985]	sushi, von Willebrand factor type A, EGF and pentraxin domain containing 1 [Source:HGNC Symbol;Acc:15985]
LOC101465156	LOC101465156	poly [ADP-ribose] polymerase 14	NC_036782.1	19199508	19210099	TF316072	PARP15	poly (ADP-ribose) polymerase family, member 15 [Source:HGNC Symbol;Acc:26876]	Uncharacterized protein [Source:UniProtKB/TrEMBL;Acc:F1QAF9]
LOC111501397	trnal-cag	tRNA-Leu	NC_036782.1	19360473	19360555	NA	NA	NA	NA
LOC111501395	trnag-gcc	tRNA-Gly	NC_036782.1	19416524	19416594	NA	NA	NA	NA
LOC112430804	LOC112430804	uncharacterized LOC112430804	NC_036782.1	19476823	19478593	TF316327	NA	NA	NA
LOC112432109	LOC112432109	uncharacterized LOC112432109%2C transcript variant X1	NC_036782.1	19499543	19501225	NA	NA	NA	NA
LOC101477315	chd3	chromodomain helicase DNA binding protein 3%2C transcript variant X1	NC_036782.1	19898784	19955120	TF300674	SMARCA5	SWI/SNF related, matrix associated, actin dependent regulator of chromatin, subfamily a, member 5 [Source:HGNC Symbol;Acc:11101]	SWI/SNF related, matrix associated, actin dependent regulator of chromatin, subfamily a, member 1 [Source:HGNC Symbol;Acc:11097]
LOC101479932	rbpj	recombination signal binding protein for immunoglobulin kappa J region	NC_036782.1	20061467	20112777	TF314117	RBPJ	recombination signal binding protein for immunoglobulin kappa J region [Source:HGNC Symbol;Acc:5724]	recombination signal binding protein for immunoglobulin kappa J region b [Source:ZFIN;Acc:ZDB-GENE-070319-1]
LOC101480999	stim2	stromal interaction molecule 2	NC_036782.1	20162470	20218603	TF313487	STIM2	stromal interaction molecule 2 [Source:HGNC Symbol;Acc:19205]	stromal interaction molecule 2 [Source:ZFIN;Acc:ZDB-GENE-120404-3]
LOC111500717	trnar-acg	tRNA-Arg	NC_036782.1	20351472	20351544	NA	NA	NA	NA
LOC101481296	pcdh7	protocadherin 7%2C transcript variant X1	NC_036782.1	20746214	20865157	TF320624	PCDH7	protocadherin 7 [Source:HGNC Symbol;Acc:8659]	protocadherin 7b [Source:ZFIN;Acc:ZDB-GENE-081104-299]
LOC106675148	LOC106675148	uncharacterized LOC106675148	NC_036782.1	20807086	20809348	NA	NA	NA	NA
LOC112430808	LOC112430808	uncharacterized LOC112430808	NC_036782.1	20968635	21031285	TF329121	CantFind	CantFind	CantFind
LOC101482555	arap2	ArfGAP with RhoGAP domain%2C ankyrin repeat and PH domain 2%2C transcript variant X1	NC_036782.1	21390569	21569794	TF105769	ARAP2	ArfGAP with RhoGAP domain, ankyrin repeat and PH domain 2 [Source:HGNC Symbol;Acc:16924]	ArfGAP with RhoGAP domain, ankyrin repeat and PH domain 2 [Source:HGNC Symbol;Acc:16924]
LOC101478148	dthd1	death domain containing 1	NC_036782.1	21571602	21585018	TF351910	DTHD1	death domain containing 1 [Source:HGNC Symbol;Acc:37261]	Uncharacterized protein [Source:UniProtKB/TrEMBL;Acc:E7EZ74]
LOC101483035	nwd2	NACHT and WD repeat domain containing 2%2C transcript variant X2	NC_036782.1	21724997	21783801	TF332647	KIAA1239	KIAA1239 [Source:HGNC Symbol;Acc:29229]	Uncharacterized protein [Source:UniProtKB/TrEMBL;Acc:E7EZX4]
LOC101483511	LOC101483511	uncharacterized LOC101483511%2C transcript variant X2	NC_036782.1	21789147	21819207	TF337421	C4orf19	chromosome 4 open reading frame 19 [Source:HGNC Symbol;Acc:25618]	NA
LOC101484355	rell1	RELT like 1	NC_036782.1	21829357	21863286	TF332339	RELL1	RELT-like 1 [Source:HGNC Symbol;Acc:27379]	RELT-like 1 [Source:HGNC Symbol;Acc:27379]
LOC101484623	LOC101484623	uncharacterized LOC101484623	NC_036782.1	21867934	21871610	TF343228	NA	NA	Uncharacterized protein [Source:UniProtKB/TrEMBL;Acc:E7F1T5]
LOC101485389	LOC101485389	procollagen C-endopeptidase enhancer 2%2C transcript variant X1	NC_036782.1	21912903	21921694	TF316506	PCOLCE	procollagen C-endopeptidase enhancer [Source:HGNC Symbol;Acc:8738]	procollagen C-endopeptidase enhancer [Source:HGNC Symbol;Acc:8738]
LOC101466961	dok7	docking protein 7%2C transcript variant X1	NC_036782.1	23154994	23207415	TF332288	DOK7	docking protein 7 [Source:HGNC Symbol;Acc:26594]	docking protein 7 [Source:HGNC Symbol;Acc:26594]
LOC101487447	LOC101487447	regulator of G-protein signaling 12%2C transcript variant X1	NC_036782.1	23227672	23273080	TF328814	RGS12	regulator of G-protein signaling 12 [Source:HGNC Symbol;Acc:9994]	regulator of G-protein signaling 12a [Source:ZFIN;Acc:ZDB-GENE-030131-2614]
LOC101487733	msantd1	Myb/SANT DNA binding domain containing 1	NC_036782.1	23274234	23277943	TF331923	MSANTD1	Myb/SANT-like DNA-binding domain containing 1 [Source:HGNC Symbol;Acc:33741]	Uncharacterized protein [Source:UniProtKB/TrEMBL;Acc:E7EZ34]
LOC101477290	LOC101477290	cell wall integrity and stress response component 4	NC_036782.1	23617326	23621873	TF351213	NA	NA	NA	None	NANoHomolog
LOC101473338	LOC101473338	putative uncharacterized protein DDB_G0279653	NC_036782.1	23624464	23663778	NoHit	NA	NA	NA
LOC101472656	LOC101472656	uncharacterized LOC101472656	NC_036782.1	23692227	23693752	NA	NA	NA	NA
LOC101470721	mfsd8	major facilitator superfamily domain containing 8%2C transcript variant X1	NC_036782.1	23785432	23791898	TF316590	MFSD8	major facilitator superfamily domain containing 8 [Source:HGNC Symbol;Acc:28486]	major facilitator superfamily domain containing 8 [Source:ZFIN;Acc:ZDB-GENE-060818-29]
LOC101468404	LOC101468404	glucosidase 2 subunit beta	NC_036782.1	23969555	24145854	TF329550	PRKCSH	protein kinase C substrate 80K-H [Source:HGNC Symbol;Acc:9411]	protein kinase C substrate 80K-H [Source:ZFIN;Acc:ZDB-GENE-040426-770]
LOC101467705	elavl2	ELAV like RNA binding protein 2%2C transcript variant X2	NC_036782.1	24176239	24207499	TF313377	ELAVL2	ELAV (embryonic lethal, abnormal vision, Drosophila)-like 2 (Hu antigen B) [Source:HGNC Symbol;Acc:3313]	ELAV (embryonic lethal, abnormal vision, Drosophila)-like 2 (Hu antigen B) [Source:ZFIN;Acc:ZDB-GENE-040704-9]
LOC101467385	caap1	caspase activity and apoptosis inhibitor 1	NC_036782.1	24391832	24396633	TF332850	CAAP1	caspase activity and apoptosis inhibitor 1 [Source:HGNC Symbol;Acc:25834]	Uncharacterized protein [Source:UniProtKB/TrEMBL;Acc:E7F2J7]
LOC101476448	LOC101476448	ATP-binding cassette sub-family A member 1	NC_036782.1	24444246	24637494	TF105191	ABCA1	ATP-binding cassette, sub-family A (ABC1), member 1 [Source:HGNC Symbol;Acc:29]	Uncharacterized protein [Source:UniProtKB/TrEMBL;Acc:E7EZB2]
LOC101465762	LOC101465762	adhesion G protein-coupled receptor L3%2C transcript variant X1	NC_036782.1	24693773	24959595	TF351999	LPHN3	latrophilin 3 [Source:HGNC Symbol;Acc:20974]	latrophilin 3.1 [Source:ZFIN;Acc:ZDB-GENE-030131-7856]
LOC101463840	tyrp1	tyrosinase related protein 1	NC_036782.1	25053497	25058085	TF315865	TYRP1	tyrosinase-related protein 1 [Source:HGNC Symbol;Acc:12450]	tyrosinase-related protein 1 [Source:HGNC Symbol;Acc:12450]
LOC101484991	ptprd	protein tyrosine phosphatase%2C receptor type D%2C transcript variant X1	NC_036782.1	25196106	25610892	TF312900	PTPRD	protein tyrosine phosphatase, receptor type, D [Source:HGNC Symbol;Acc:9668]	Uncharacterized protein [Source:UniProtKB/TrEMBL;Acc:E7F4G9]
LOC101483382	LOC101483382	myozenin-2	NC_036782.1	25829632	25838813	TF331748	MYOZ2	myozenin 2 [Source:HGNC Symbol;Acc:1330]	myozenin 2a [Source:ZFIN;Acc:ZDB-GENE-040426-1880]
LOC101482147	adgra3	adhesion G protein-coupled receptor A3	NC_036782.1	26052736	26085262	TF331206	GPR125	G protein-coupled receptor 125 [Source:HGNC Symbol;Acc:13839]	G protein-coupled receptor 125 [Source:HGNC Symbol;Acc:13839]
LOC101481844	LOC101481844	cytosolic beta-glucosidase	NC_036782.1	26086432	26119552	TF314803	LCT	lactase [Source:HGNC Symbol;Acc:6530]	zgc:112375 [Source:ZFIN;Acc:ZDB-GENE-050522-351]
LOC101480402	ppargc1a	PPARG coactivator 1 alpha%2C transcript variant X3	NC_036782.1	26255703	26292198	TF343068	PPARGC1A	peroxisome proliferator-activated receptor gamma, coactivator 1 alpha [Source:HGNC Symbol;Acc:9237]	peroxisome proliferator-activated receptor gamma, coactivator 1 alpha [Source:ZFIN;Acc:ZDB-GENE-080505-1]
LOC101479903	LOC101479903	pre-mRNA-splicing factor ATP-dependent RNA helicase DHX15%2C transcript variant X2	NC_036782.1	26572023	26597959	TF105735	DHX15	DEAH (Asp-Glu-Ala-His) box polypeptide 15 [Source:HGNC Symbol;Acc:2738]	DEAH (Asp-Glu-Ala-His) box polypeptide 15 [Source:ZFIN;Acc:ZDB-GENE-030131-650]
LOC101478871	LOC101478871	coiled-coil domain-containing protein 149%2C transcript variant X4	NC_036782.1	26604208	26622819	TF319794	CCDC149	coiled-coil domain containing 149 [Source:HGNC Symbol;Acc:25405]	coiled-coil domain containing 149a [Source:ZFIN;Acc:ZDB-GENE-041010-113]
LOC101478597	LOC101478597	serine/threonine-protein kinase ppk4-like	NC_036782.1	26624192	26629471	TF313986	ERN1	endoplasmic reticulum to nucleus signaling 1 [Source:HGNC Symbol;Acc:3449]	endoplasmic reticulum to nucleus signaling 1 [Source:ZFIN;Acc:ZDB-GENE-050522-431]
LOC101474696	sepsecs	Sep (O-phosphoserine) tRNA:Sec (selenocysteine) tRNA synthase	NC_036782.1	26730738	26745877	TF314381	SEPSECS	Sep (O-phosphoserine) tRNA:Sec (selenocysteine) tRNA synthase [Source:HGNC Symbol;Acc:30605]	Sep (O-phosphoserine) tRNA:Sec (selenocysteine) tRNA synthase [Source:ZFIN;Acc:ZDB-GENE-040426-859]	None	NANoHomolog
LOC101474977	col25a1	collagen type XXV alpha 1 chain%2C transcript variant X1	NC_036782.1	26835013	26992993	TF344135	COL4A5	collagen, type IV, alpha 5 [Source:HGNC Symbol;Acc:2207]	collagen, type IV, alpha 6 [Source:ZFIN;Acc:ZDB-GENE-101001-2]
LOC111500816	trnar-ccu	tRNA-Arg	NC_036782.1	26981625	26981697	NA	NA	NA	NA
LOC111500814	trnai-aau	tRNA-Ile	NC_036782.1	27008949	27009022	NA	NA	NA	NA
LOC101469483	adamtsl1	ADAMTS like 1%2C transcript variant X1	NC_036782.1	27015087	27117076	TF351125	ADAMTSL1	ADAMTS-like 1 [Source:HGNC Symbol;Acc:14632]	Uncharacterized protein [Source:UniProtKB/TrEMBL;Acc:E7FBX1]
LOC101466053	nfib	nuclear factor I B%2C transcript variant X1	NC_036782.1	27224068	27288536	TF313889	NFIB	nuclear factor I/B [Source:HGNC Symbol;Acc:7785]	nuclear factor I/C [Source:ZFIN;Acc:ZDB-GENE-080305-2]
LOC111501107	trnam-cau	tRNA-Met	NC_036782.1	27447095	27447166	NA	NA	NA	NA
LOC101487564	pc	pyruvate carboxylase%2C transcript variant X5	NC_036782.1	27556670	27861412	TF300535	PC	pyruvate carboxylase [Source:HGNC Symbol;Acc:8636]	pyruvate carboxylase, like [Source:ZFIN;Acc:ZDB-GENE-090908-3]
LOC101474135	plcb3	phospholipase C beta 3%2C transcript variant X1	NC_036782.1	27978125	28034743	TF313216	PLCB3	phospholipase C, beta 3 (phosphatidylinositol-specific) [Source:HGNC Symbol;Acc:9056]	phospholipase C, beta 3 (phosphatidylinositol-specific) [Source:ZFIN;Acc:ZDB-GENE-030616-594]
LOC112430869	LOC112430869		NC_036782.1	28157462	28175933	NA	NA	NA	NA
LOC101481944	LOC101481944	putative GPI-anchored protein pfl2	NC_036782.1	28427463	28435694	TF332340	BATF2	basic leucine zipper transcription factor, ATF-like 2 [Source:HGNC Symbol;Acc:25163]	basic leucine zipper transcription factor, ATF-like [Source:ZFIN;Acc:ZDB-GENE-041014-291]
LOC112430885	LOC112430885		NC_036782.1	29087596	29105157	NA	NA	NA	NA
LOC101467871	LOC101467871	dynactin subunit 1%2C transcript variant X1	NC_036782.1	29156979	29169456	TF105246	DCTN1	dynactin 1 [Source:HGNC Symbol;Acc:2711]	dynactin 1a [Source:ZFIN;Acc:ZDB-GENE-070117-2205]
LOC101465943	kdm6b	lysine demethylase 6B	NC_036782.1	29207479	29215027	TF317405	KDM6B	lysine (K)-specific demethylase 6B [Source:HGNC Symbol;Acc:29012]	lysine (K)-specific demethylase 6B [Source:HGNC Symbol;Acc:29012]
LOC101465634	dnah2	dynein axonemal heavy chain 2	NC_036782.1	29318341	29381144	TF316836	DNAH2	dynein, axonemal, heavy chain 2 [Source:HGNC Symbol;Acc:2948]	Uncharacterized protein [Source:UniProtKB/TrEMBL;Acc:E7EZB9]
LOC111500708	trnac-gca	tRNA-Cys	NC_036782.1	29586812	29586883	NA	NA	NA	NA
LOC112430888	LOC112430888	zinc finger BED domain-containing protein 1-like	NC_036782.1	29758476	29760569	TF351726	NA	NA	Uncharacterized protein [Source:UniProtKB/TrEMBL;Acc:F1Q8J3]
LOC101464304	LOC101464304	ephrin-B2	NC_036782.1	29789207	29878133	TF315495	NA	NA	NA
LOC101464005	nlgn2	neuroligin 2	NC_036782.1	30286662	30525412	TF326187	NLGN2	neuroligin 2 [Source:HGNC Symbol;Acc:14290]	neuroligin 2a [Source:ZFIN;Acc:ZDB-GENE-090918-2]
LOC112430892	LOC112430892	uncharacterized LOC112430892	NC_036782.1	30489687	30551371	TF343022	NA	NA	NA
LOC101482357	LOC101482357	uncharacterized LOC101482357	NC_036782.1	30551865	30553912	TF343228	NA	NA	si:dkey-177p2.16 [Source:ZFIN;Acc:ZDB-GENE-061026-1]
LOC101478660	tmem256	transmembrane protein 256	NC_036782.1	30560294	30564505	TF300271	TMEM256	transmembrane protein 256 [Source:HGNC Symbol;Acc:28618]	NA
LOC111501194	LOC111501194	U6 spliceosomal RNA	NC_036782.1	30609837	30609942	NA	NA	NA	NA
LOC101477922	fgf11	fibroblast growth factor 11	NC_036782.1	30658511	30769471	TF330751	FGF12	fibroblast growth factor 12 [Source:HGNC Symbol;Acc:3668]	fibroblast growth factor 12a [Source:ZFIN;Acc:ZDB-GENE-050221-6]
LOC101470790	LOC101470790	immunoglobulin kappa light chain	NC_036782.1	31105129	31107014	TF334840	NA	NA	novel immune-type receptor 12 [Source:ZFIN;Acc:ZDB-GENE-041001-1]
LOC101484573	LOC101484573	uncharacterized LOC101484573	NC_036782.1	31108298	31113851	TF334840	NA	NA	novel immune-type receptor 12 [Source:ZFIN;Acc:ZDB-GENE-041001-1]
LOC112430931	LOC112430931	uncharacterized LOC112430931	NC_036782.1	31113958	31115456	TF334840	NA	NA	novel immune-type receptor 8 [Source:ZFIN;Acc:ZDB-GENE-041001-7]
LOC101484029	LOC101484029	uncharacterized LOC101484029	NC_036782.1	31127370	31129319	TF334840	NA	NA	novel immune-type receptor 8 [Source:ZFIN;Acc:ZDB-GENE-041001-7]
LOC101470203	LOC101470203	uncharacterized LOC101470203	NC_036782.1	31158536	31160583	TF334840	NA	NA	novel immune-type receptor 12 [Source:ZFIN;Acc:ZDB-GENE-041001-1]
LOC101471435	LOC101471435	uncharacterized LOC101471435%2C transcript variant X1	NC_036782.1	31378202	31379927	TF334840	NA	NA	novel immune-type receptor 7b [Source:ZFIN;Acc:ZDB-GENE-041001-8]
LOC106676849	LOC106676849	NXPE family member 3-like	NC_036782.1	31417303	31435628	TF329555	NXPE3	neurexophilin and PC-esterase domain family, member 3 [Source:HGNC Symbol;Acc:28238]	neurexophilin and PC-esterase domain family, member 3 [Source:ZFIN;Acc:ZDB-GENE-061013-214]
LOC112430969	LOC112430969	NXPE family member 3-like	NC_036782.1	31495642	31503809	TF329555	NXPE3	neurexophilin and PC-esterase domain family, member 3 [Source:HGNC Symbol;Acc:28238]	neurexophilin and PC-esterase domain family, member 3 [Source:ZFIN;Acc:ZDB-GENE-061013-214]
LOC112430975	LOC112430975	protein NLRC3-like	NC_036782.1	31686769	31718633	TF352120	NA	NA	si:dkey-13n15.11 [Source:ZFIN;Acc:ZDB-GENE-070705-295]
LOC101470075	LOC101470075	fragile X mental retardation syndrome-related protein 1%2C transcript variant X2	NC_036782.1	32018902	32035139	TF105427	FXR2	fragile X mental retardation, autosomal homolog 2 [Source:HGNC Symbol;Acc:4024]	fragile X mental retardation, autosomal homolog 2 [Source:ZFIN;Acc:ZDB-GENE-040426-943]
LOC101466856	LOC101466856	nectin-4	NC_036782.1	32214305	32231365	TF338610	PVRL4	poliovirus receptor-related 4 [Source:HGNC Symbol;Acc:19688]	poliovirus receptor-related 4 [Source:HGNC Symbol;Acc:19688]
LOC112430364	LOC112430364	uncharacterized LOC112430364	NC_036782.1	32341521	32341943	NA	NA	NA	NA
LOC101464276	LOC101464276	neurexin-2%2C transcript variant X1	NC_036782.1	32502017	33213135	TF321302	NRXN2	neurexin 2 [Source:HGNC Symbol;Acc:8009]	neurexin 2 [Source:HGNC Symbol;Acc:8009]
LOC101463885	LOC101463885	mitogen-activated protein kinase kinase kinase 11%2C transcript variant X1	NC_036782.1	33268783	33314897	TF105118	MAP3K11	mitogen-activated protein kinase kinase kinase 11 [Source:HGNC Symbol;Acc:6850]	si:ch211-120p12.3 [Source:ZFIN;Acc:ZDB-GENE-090312-24]
LOC101486750	LOC101486750	serine/threonine-protein phosphatase PP1-beta catalytic subunit	NC_036782.1	33340695	33371291	TF354243	PPP1CB	protein phosphatase 1, catalytic subunit, beta isozyme [Source:HGNC Symbol;Acc:9282]	protein phosphatase 1, catalytic subunit, beta isoform [Source:ZFIN;Acc:ZDB-GENE-030616-609]
LOC112429750	ablim2	actin binding LIM protein family member 2%2C transcript variant X2	NC_036782.1	33403294	33452553	TF318042	ABLIM2	actin binding LIM protein family, member 2 [Source:HGNC Symbol;Acc:19195]	Uncharacterized protein [Source:UniProtKB/TrEMBL;Acc:E7F030]
LOC101487074	LOC101487074	cGMP-specific 3'%2C5'-cyclic phosphodiesterase	NC_036782.1	33528084	33595568	TF316499	PDE5A	phosphodiesterase 5A, cGMP-specific [Source:HGNC Symbol;Acc:8784]	phosphodiesterase 5A, cGMP-specific, b [Source:ZFIN;Acc:ZDB-GENE-060824-4]
LOC101481414	sorcs2	sortilin related VPS10 domain containing receptor 2	NC_036782.1	33634667	33989107	TF324918	SORCS2	sortilin-related VPS10 domain containing receptor 2 [Source:HGNC Symbol;Acc:16698]	Uncharacterized protein [Source:UniProtKB/TrEMBL;Acc:E7FD83]
LOC112431148	LOC112431148	cGMP-specific 3'%2C5'-cyclic phosphodiesterase-like	NC_036782.1	34174390	34199749	TF316499	PDE5A	phosphodiesterase 5A, cGMP-specific [Source:HGNC Symbol;Acc:8784]	phosphodiesterase 5A, cGMP-specific, b [Source:ZFIN;Acc:ZDB-GENE-060824-4]
LOC111501242	trnas-uga	tRNA-Ser	NC_036782.1	34676458	34676539	NA	NA	NA	NA
LOC101479818	LOC101479818	zonadhesin	NC_036782.1	34682515	34740498	TF300299	TECTA	tectorin alpha [Source:HGNC Symbol;Acc:11720]	Uncharacterized protein [Source:UniProtKB/TrEMBL;Acc:F1QS73]
LOC112430415	LOC112430415	zinc finger BED domain-containing protein 1-like	NC_036782.1	35107260	35109090	TF322818	ZBED1	zinc finger, BED-type containing 1 [Source:HGNC Symbol;Acc:447]	Uncharacterized protein [Source:UniProtKB/TrEMBL;Acc:F1QYA4]
LOC112431019	LOC112431019	uncharacterized LOC112431019	NC_036782.1	35566368	35569146	TF335156	NA	NA	si:dkey-11d20.1 [Source:ZFIN;Acc:ZDB-GENE-070705-291]
LOC112430458	LOC112430458	peroxisomal acyl-coenzyme A oxidase 3-like	NC_036782.1	35576505	35585890	TF314226	ACOX3	acyl-CoA oxidase 3, pristanoyl [Source:HGNC Symbol;Acc:121]	acyl-Coenzyme A oxidase 3, pristanoyl [Source:ZFIN;Acc:ZDB-GENE-040426-2163]
LOC101472872	ankfn1	ankyrin repeat and fibronectin type III domain containing 1	NC_036782.1	35851084	35906991	TF314968	ANKFN1	ankyrin-repeat and fibronectin type III domain containing 1 [Source:HGNC Symbol;Acc:26766]	Uncharacterized protein [Source:UniProtKB/TrEMBL;Acc:E7F0D1]
LOC101465599	LOC101465599	chromobox protein homolog 2	NC_036782.1	35927049	35933111	TF106456	CBX2	chromobox homolog 2 [Source:HGNC Symbol;Acc:1552]	chromobox homolog 2 (Drosophila Pc class) [Source:ZFIN;Acc:ZDB-GENE-030131-5502]
LOC101464831	LOC101464831	ras-related protein Rab-40B	NC_036782.1	35949048	35961959	TF323230	RAB40B	RAB40B, member RAS oncogene family [Source:HGNC Symbol;Acc:18284]	RAB40B, member RAS oncogene family [Source:ZFIN;Acc:ZDB-GENE-040718-257]
LOC101483620	LOC101483620	cGMP-dependent protein kinase 1%2C transcript variant X2	NC_036782.1	36133281	36208592	TF313261	PRKG1	protein kinase, cGMP-dependent, type I [Source:HGNC Symbol;Acc:9414]	protein kinase, cGMP-dependent, type Ia [Source:ZFIN;Acc:ZDB-GENE-040426-1308]
LOC101482863	asah2	N-acylsphingosine amidohydrolase 2	NC_036782.1	36221580	36232935	TF300786	ASAH2	N-acylsphingosine amidohydrolase (non-lysosomal ceramidase) 2 [Source:HGNC Symbol;Acc:18860]	N-acylsphingosine amidohydrolase 2 [Source:ZFIN;Acc:ZDB-GENE-041112-1]
LOC112431033	LOC112431033	monocarboxylate transporter 12-B-like	NC_036782.1	36264567	36272549	TF313792	SLC16A12	solute carrier family 16, member 12 (monocarboxylic acid transporter 12) [Source:HGNC Symbol;Acc:23094]	solute carrier family 16 (monocarboxylic acid transporters), member 12b [Source:ZFIN;Acc:ZDB-GENE-050522-80]
LOC112431035	LOC112431035	kinesin-like protein KIF20B	NC_036782.1	36275430	36289972	TF105232	KIF20B	kinesin family member 20B [Source:HGNC Symbol;Acc:7212]	kinesin family member 20B [Source:HGNC Symbol;Acc:7212]
LOC101481588	LOC101481588	Bardet-Biedl syndrome 1 protein homolog	NC_036782.1	36290393	36298420	TF312892	BBS1	Bardet-Biedl syndrome 1 [Source:HGNC Symbol;Acc:966]	Bardet-Biedl syndrome 1 [Source:ZFIN;Acc:ZDB-GENE-060126-1]
LOC112429826	atad1	ATPase family%2C AAA domain containing 1%2C transcript variant X2	NC_036782.1	36313715	36318671	TF105016	ATAD1	ATPase family, AAA domain containing 1 [Source:HGNC Symbol;Acc:25903]	ATPase family, AAA domain containing 1b [Source:ZFIN;Acc:ZDB-GENE-030616-44]
LOC101480618	LOC101480618	phosphatidylinositol 3%2C4%2C5-trisphosphate 3-phosphatase and dual-specificity protein phosphatase PTEN%2C transcript variant X1	NC_036782.1	36320442	36331256	TF324513	PTEN	phosphatase and tensin homolog [Source:HGNC Symbol;Acc:9588]	phosphatase and tensin homolog B [Source:ZFIN;Acc:ZDB-GENE-030616-47]
LOC101479856	rnls	renalase%2C FAD dependent amine oxidase%2C transcript variant X1	NC_036782.1	36332908	36336700	TF332799	RNLS	renalase, FAD-dependent amine oxidase [Source:HGNC Symbol;Acc:25641]	renalase, FAD-dependent amine oxidase [Source:ZFIN;Acc:ZDB-GENE-040718-351]
LOC101471135	acta2	actin%2C alpha 2%2C smooth muscle%2C aorta	NC_036782.1	36358224	36364249	TF354237	ACTG2	actin, gamma 2, smooth muscle, enteric [Source:HGNC Symbol;Acc:145]	actin, alpha 2, smooth muscle, aorta [Source:ZFIN;Acc:ZDB-GENE-030131-1229]
LOC101470266	rpp30	ribonuclease P/MRP subunit p30	NC_036782.1	36465044	36474130	TF106113	RPP30	ribonuclease P/MRP 30kDa subunit [Source:HGNC Symbol;Acc:17688]	ribonuclease P/MRP 30 subunit [Source:ZFIN;Acc:ZDB-GENE-050320-45]
LOC101476668	LOC101476668	transcription factor COE3%2C transcript variant X1	NC_036782.1	36619531	36679307	TF313391	EBF3	early B-cell factor 3 [Source:HGNC Symbol;Acc:19087]	early B-cell factor 3 [Source:ZFIN;Acc:ZDB-GENE-070112-292]
LOC101469427	LOC101469427	glutamate receptor ionotropic%2C delta-1	NC_036782.1	37140926	37235109	TF352434	GRID1	glutamate receptor, ionotropic, delta 1 [Source:HGNC Symbol;Acc:4575]	glutamate receptor, ionotropic, delta 1 [Source:HGNC Symbol;Acc:4575]
LOC101480863	LOC101480863	leukocyte immunoglobulin-like receptor subfamily A member 6	NC_036783.1	4740	14034	TF336644	TARM1	T cell-interacting, activating receptor on myeloid cells 1 [Source:HGNC Symbol;Acc:37250]	NA	None	NANoHomolog
LOC101480183	LOC101480183	ornithine decarboxylase%2C transcript variant X2	NC_036783.1	32584	59639	TF300760	ODC1	ornithine decarboxylase 1 [Source:HGNC Symbol;Acc:8109]	ornithine decarboxylase 1 [Source:ZFIN;Acc:ZDB-GENE-010816-1]
LOC101479526	LOC101479526	protein TANC2%2C transcript variant X1	NC_036783.1	62163	122090	TF323159	TANC2	tetratricopeptide repeat, ankyrin repeat and coiled-coil containing 2 [Source:HGNC Symbol;Acc:30212]	tetratricopeptide repeat, ankyrin repeat and coiled-coil containing 2 [Source:ZFIN;Acc:ZDB-GENE-060130-180]
LOC101479231	LOC101479231	cytochrome b561	NC_036783.1	122802	133508	TF314222	CYB561	cytochrome b-561 [Source:HGNC Symbol;Acc:2571]	cytochrome b-561 [Source:ZFIN;Acc:ZDB-GENE-070713-3]
LOC101478760	hdac5	histone deacetylase 5	NC_036783.1	168038	209942	TF106174	HDAC5	histone deacetylase 5 [Source:HGNC Symbol;Acc:14068]	histone deacetylase 5 [Source:HGNC Symbol;Acc:14068]
LOC101476419	col1a1	collagen type I alpha 1 chain%2C transcript variant X1	NC_036783.1	291073	310516	TF323987	COL11A1	collagen, type XI, alpha 1 [Source:HGNC Symbol;Acc:2186]	collagen, type I, alpha 1a [Source:ZFIN;Acc:ZDB-GENE-030131-9102]
LOC105941471	LOC105941471	beta-1%2C4 N-acetylgalactosaminyltransferase 2	NC_036783.1	648094	698674	TF332297	B4GALNT2	beta-1,4-N-acetyl-galactosaminyl transferase 2 [Source:HGNC Symbol;Acc:24136]	Uncharacterized protein [Source:UniProtKB/TrEMBL;Acc:E7EXK5]
LOC101475627	nags	N-acetylglutamate synthase	NC_036783.1	715098	722729	TF332628	NAGS	N-acetylglutamate synthase [Source:HGNC Symbol;Acc:17996]	N-acetylglutamate synthase [Source:HGNC Symbol;Acc:17996]
LOC101477257	LOC101477257	cyclin-dependent kinase 5 activator 1	NC_036783.1	861623	871783	TF101036	CDK5R1	cyclin-dependent kinase 5, regulatory subunit 1 (p35) [Source:HGNC Symbol;Acc:1775]	cyclin-dependent kinase 5, regulatory subunit 1a (p35) [Source:ZFIN;Acc:ZDB-GENE-080723-17]
LOC101477540	LOC101477540	vesicle-fusing ATPase%2C transcript variant X1	NC_036783.1	875581	955105	TF300371	NSF	N-ethylmaleimide-sensitive factor [Source:HGNC Symbol;Acc:8016]	N-ethylmaleimide-sensitive factor a [Source:ZFIN;Acc:ZDB-GENE-030616-37]
LOC112434703	LOC112434703	uncharacterized LOC112434703	NC_036783.1	1317751	1320398	TF342704	NA	NA	Uncharacterized protein [Source:UniProtKB/TrEMBL;Acc:H9GY15]
LOC101473996	LOC101473996	potassium voltage-gated channel subfamily C member 1-like%2C transcript variant X6	NC_036783.1	1602398	1704044	TF352511	KCNC3	potassium voltage-gated channel, Shaw-related subfamily, member 3 [Source:HGNC Symbol;Acc:6235]	potassium voltage-gated channel, Shaw-related subfamily, member 3b [Source:ZFIN;Acc:ZDB-GENE-100901-2]
LOC101470012	lin7b	lin-7 homolog B%2C crumbs cell polarity complex component%2C transcript variant X1	NC_036783.1	2018699	2042628	TF316850	LIN7B	lin-7 homolog B (C. elegans) [Source:HGNC Symbol;Acc:17788]	lin-7 homolog B (C. elegans) [Source:ZFIN;Acc:ZDB-GENE-041011-1]
LOC101467469	LOC101467469	ras-related protein R-Ras%2C transcript variant X1	NC_036783.1	2135620	2149355	TF312796	RRAS	related RAS viral (r-ras) oncogene homolog [Source:HGNC Symbol;Acc:10447]	related RAS viral (r-ras) oncogene homolog [Source:ZFIN;Acc:ZDB-GENE-041010-217]
LOC101466526	LOC101466526	transmembrane gamma-carboxyglutamic acid protein 2	NC_036783.1	2151482	2158226	TF332123	PRRG4	proline rich Gla (G-carboxyglutamic acid) 4 (transmembrane) [Source:HGNC Symbol;Acc:30799]	transmembrane gamma-carboxyglutamic acid protein 2-like precursor [Source:RefSeq peptide;Acc:NP_001189407]
LOC101474844	LOC101474844	proline-rich protein 12	NC_036783.1	2158460	2220197	TF333141	PRR12	proline rich 12 [Source:HGNC Symbol;Acc:29217]	proline rich 12 [Source:HGNC Symbol;Acc:29217]
LOC112434724	LOC112434724	neurabin-2-like%2C transcript variant X1	NC_036783.1	2416103	2447440	TF105540	PPP1R9A	protein phosphatase 1, regulatory subunit 9A [Source:HGNC Symbol;Acc:14946]	Uncharacterized protein [Source:UniProtKB/TrEMBL;Acc:E7F3J0]
LOC101486189	LOC101486189	guanine nucleotide-binding protein G(I)/G(S)/G(O) subunit gamma-13	NC_036783.1	2631871	2645833	TF319909	GNG13	guanine nucleotide binding protein (G protein), gamma 13 [Source:HGNC Symbol;Acc:14131]	guanine nucleotide binding protein (G protein), gamma 13b [Source:ZFIN;Acc:ZDB-GENE-040718-97]
LOC101481128	pih1d1	PIH1 domain containing 1%2C transcript variant X2	NC_036783.1	2993965	3013253	TF324376	PIH1D1	PIH1 domain containing 1 [Source:HGNC Symbol;Acc:26075]	PIH1 domain containing 1 [Source:ZFIN;Acc:ZDB-GENE-050309-147]
LOC101481144	LOC101481144	retinoic acid receptor alpha-B	NC_036783.1	3279545	3297351	TF328382	RARA	retinoic acid receptor, alpha [Source:HGNC Symbol;Acc:9864]	retinoic acid receptor, alpha b [Source:ZFIN;Acc:ZDB-GENE-980526-72]
LOC112434696	LOC112434696	putative nuclease HARBI1	NC_036783.1	3410126	3411483	TF327972	HARBI1	harbinger transposase derived 1 [Source:HGNC Symbol;Acc:26522]	Uncharacterized protein [Source:UniProtKB/TrEMBL;Acc:F1QYX7]
LOC101464381	LOC101464381	homeobox protein Hox-B13a	NC_036783.1	3537643	3539944	TF330813	HOXB13	homeobox B13 [Source:HGNC Symbol;Acc:5112]	homeo box B13a [Source:ZFIN;Acc:ZDB-GENE-050812-1]
LOC112434706	LOC112434706	uncharacterized LOC112434706	NC_036783.1	3561906	3570464	NoHit	NA	NA	NA
LOC101464099	hoxb9	homeobox B9	NC_036783.1	3638464	3648744	TF317819	HOXB9	homeobox B9 [Source:HGNC Symbol;Acc:5120]	homeo box B9a [Source:ZFIN;Acc:ZDB-GENE-990415-109]
LOC101487328	hoxb8	homeobox B8%2C transcript variant X1	NC_036783.1	3659476	3666610	TF316310	HOXB8	homeobox B8 [Source:HGNC Symbol;Acc:5119]	homeo box B8a [Source:ZFIN;Acc:ZDB-GENE-990415-108]
LOC101487809	LOC101487809	homeobox protein Hox-B7-A	NC_036783.1	3668432	3674438	TF316310	HOXB8	homeobox B8 [Source:HGNC Symbol;Acc:5119]	homeo box B8a [Source:ZFIN;Acc:ZDB-GENE-990415-108]
LOC105941318	LOC105941318	uncharacterized LOC105941318%2C transcript variant X1	NC_036783.1	3682181	3693534	NA	NA	NA	NA
LOC101488082	LOC101488082	homeobox protein Hox-B6a	NC_036783.1	3685868	3689610	TF316310	HOXB6	homeobox B6 [Source:HGNC Symbol;Acc:5117]	homeo box B6a [Source:ZFIN;Acc:ZDB-GENE-990415-106]
LOC101463796	LOC101463796	homeobox protein Hox-B5a	NC_036783.1	3692896	3696263	TF316310	HOXB5	homeobox B5 [Source:HGNC Symbol;Acc:5116]	homeo box A5a [Source:ZFIN;Acc:ZDB-GENE-000823-9]
LOC101485970	LOC101485970	uncharacterized LOC101485970	NC_036783.1	3705581	3718687	NA	NA	NA	NA
LOC101485691	LOC101485691	homeobox protein Hox-B4a	NC_036783.1	3712597	3716809	TF352857	HOXB4	homeobox B4 [Source:HGNC Symbol;Acc:5115]	homeo box B4a [Source:ZFIN;Acc:ZDB-GENE-990415-105]
LOC101486184	LOC101486184	homeobox protein Hox-B3a%2C transcript variant X2	NC_036783.1	3718703	3764440	TF315938	HOXB3	homeobox B3 [Source:HGNC Symbol;Acc:5114]	homeo box B3a [Source:ZFIN;Acc:ZDB-GENE-990415-104]
LOC101485412	LOC101485412	homeobox protein Hox-B1a-like	NC_036783.1	3789265	3791766	TF317730	HOXB1	homeobox B1 [Source:HGNC Symbol;Acc:5111]	homeo box B1a [Source:ZFIN;Acc:ZDB-GENE-990415-101]
LOC101467851	LOC101467851	chromobox protein homolog 1	NC_036783.1	3961141	3968908	TF350503	CBX1	chromobox homolog 1 [Source:HGNC Symbol;Acc:1551]	chromobox homolog 1a (HP1 beta homolog Drosophila) [Source:ZFIN;Acc:ZDB-GENE-030131-4945]
LOC101485140	LOC101485140	endoplasmic reticulum membrane sensor NFE2L1	NC_036783.1	3972013	3983115	TF326681	NFE2L1	nuclear factor (erythroid-derived 2)-like 1 [Source:HGNC Symbol;Acc:7781]	nuclear factor (erythroid-derived 2)-like 3 [Source:ZFIN;Acc:ZDB-GENE-040426-2334]
LOC101484845	LOC101484845	PRA1 family protein 3	NC_036783.1	3984219	3990041	TF105479	PRAF2	PRA1 domain family, member 2 [Source:HGNC Symbol;Acc:28911]	PRA1 domain family, member 2 [Source:ZFIN;Acc:ZDB-GENE-050417-190]
LOC101484380	LOC101484380	coatomer subunit zeta-1%2C transcript variant X2	NC_036783.1	3993600	4009277	TF300262	COPZ2	coatomer protein complex, subunit zeta 2 [Source:HGNC Symbol;Acc:19356]	zeta2-cop [Source:ZFIN;Acc:ZDB-GENE-000406-5]
LOC112434707	LOC112434707	proline-rich protein 15-like protein A	NC_036783.1	4093800	4094150	TF333189	PRR15L	proline rich 15-like [Source:HGNC Symbol;Acc:28149]	proline rich 15-like a [Source:ZFIN;Acc:ZDB-GENE-040801-218]
LOC101482975	LOC101482975	zinc finger protein 646%2C transcript variant X1	NC_036783.1	4157913	4171156	TF327421	NA	NA	zinc finger protein 646 [Source:HGNC Symbol;Acc:29004]
LOC101481514	LOC101481514	casein kinase I%2C transcript variant X1	NC_036783.1	4243159	4264850	TF300544	CSNK1D	casein kinase 1, delta [Source:HGNC Symbol;Acc:2452]	casein kinase 1, delta b [Source:ZFIN;Acc:ZDB-GENE-040426-2385]
LOC101466951	LOC101466951	cytosolic phospholipase A2 gamma%2C transcript variant X1	NC_036783.1	4465706	4483162	TF325228	PLA2G4C	phospholipase A2, group IVC (cytosolic, calcium-independent) [Source:HGNC Symbol;Acc:9037]	phospholipase A2, group IVC (cytosolic, calcium-independent) [Source:HGNC Symbol;Acc:9037]
LOC101477058	LOC101477058	carbonic anhydrase-related protein 10	NC_036783.1	4484702	4645104	TF352926	CA10	carbonic anhydrase X [Source:HGNC Symbol;Acc:1369]	si:dkey-15h19.2 [Source:ZFIN;Acc:ZDB-GENE-110408-33]
LOC101476584	rpl23	ribosomal protein L23	NC_036783.1	4757766	4762347	TF300913	RPL23	ribosomal protein L23 [Source:HGNC Symbol;Acc:10316]	ribosomal protein L23 [Source:ZFIN;Acc:ZDB-GENE-030131-8756]
LOC101475508	LOC101475508	SWI/SNF-related matrix-associated actin-dependent regulator of chromatin subfamily E member 1%2C transcript variant X1	NC_036783.1	4812983	4825681	TF321146	SMARCE1	SWI/SNF related, matrix associated, actin dependent regulator of chromatin, subfamily e, member 1 [Source:HGNC Symbol;Acc:11109]	SWI/SNF related, matrix associated, actin dependent regulator of chromatin, subfamily e, member 1 [Source:ZFIN;Acc:ZDB-GENE-030131-967]
LOC106674568	LOC106674568	uncharacterized LOC106674568	NC_036783.1	4971487	4973311	TF354128	NA	NA	Uncharacterized protein [Source:UniProtKB/TrEMBL;Acc:F1R9M4]
LOC101484624	LOC101484624	ATP synthase F(0) complex subunit C3%2C mitochondrial	NC_036783.1	4989813	4996283	TF300140	ATP5G1	ATP synthase, H+ transporting, mitochondrial Fo complex, subunit C1 (subunit 9) [Source:HGNC Symbol;Acc:841]	ATP synthase, H+ transporting, mitochondrial Fo complex, subunit C1 (subunit 9) [Source:ZFIN;Acc:ZDB-GENE-040426-1966]
LOC101484911	ube2z	ubiquitin conjugating enzyme E2 Z	NC_036783.1	5040980	5048739	TF354204	UBE2Z	ubiquitin-conjugating enzyme E2Z [Source:HGNC Symbol;Acc:25847]	ubiquitin-conjugating enzyme E2Z [Source:ZFIN;Acc:ZDB-GENE-040718-15]
LOC101485211	LOC101485211	oxysterol-binding protein-related protein 7%2C transcript variant X1	NC_036783.1	5069742	5083008	TF320922	OSBPL7	oxysterol binding protein-like 7 [Source:HGNC Symbol;Acc:16387]	oxysterol binding protein-like 7 [Source:ZFIN;Acc:ZDB-GENE-041010-212]
LOC112434688	LOC112434688	G2/M phase-specific E3 ubiquitin-protein ligase-like	NC_036783.1	5099296	5103854	TF325426	G2E3	G2/M-phase specific E3 ubiquitin protein ligase [Source:HGNC Symbol;Acc:20338]	G2/M-phase specific E3 ubiquitin ligase [Source:ZFIN;Acc:ZDB-GENE-030616-400]
LOC101486058	LOC101486058	TANK-binding kinase 1-binding protein 1	NC_036783.1	5119542	5142591	TF331289	TBKBP1	TBK1 binding protein 1 [Source:HGNC Symbol;Acc:30140]	TBK1 binding protein 1 [Source:HGNC Symbol;Acc:30140]
LOC101486353	gps1	G protein pathway suppressor 1	NC_036783.1	5155057	5168156	TF101167	GPS1	G protein pathway suppressor 1 [Source:HGNC Symbol;Acc:4549]	G protein pathway suppressor 1 [Source:ZFIN;Acc:ZDB-GENE-041111-240]
LOC101486642	LOC101486642	calcium-binding mitochondrial carrier protein SCaMC-3	NC_036783.1	5176917	5221595	TF313492	SLC25A23	solute carrier family 25 (mitochondrial carrier; phosphate carrier), member 23 [Source:HGNC Symbol;Acc:19375]	si:dkey-204f11.59 [Source:ZFIN;Acc:ZDB-GENE-040724-220]
LOC101486919	pdxdc1	pyridoxal dependent decarboxylase domain containing 1%2C transcript variant X2	NC_036783.1	5240812	5274936	TF313101	PDXDC1	pyridoxal-dependent decarboxylase domain containing 1 [Source:HGNC Symbol;Acc:28995]	pyridoxal-dependent decarboxylase domain containing 1 [Source:ZFIN;Acc:ZDB-GENE-040912-16]
LOC101463569	LOC101463569	tetraspanin-4%2C transcript variant X2	NC_036783.1	5369252	5382662	TF352892	TSPAN9	tetraspanin 9 [Source:HGNC Symbol;Acc:21640]	tetraspanin 4 [Source:ZFIN;Acc:ZDB-GENE-070410-127]
LOC101464165	LOC101464165	tetraspanin-1	NC_036783.1	5400533	5406520	TF352892	TSPAN1	tetraspanin 1 [Source:HGNC Symbol;Acc:20657]	zgc:64085 [Source:ZFIN;Acc:ZDB-GENE-040426-1362]
LOC101466079	tmem205	transmembrane protein 205	NC_036783.1	5445625	5448720	TF323838	TMEM205	transmembrane protein 205 [Source:HGNC Symbol;Acc:29631]	transmembrane protein 205 [Source:ZFIN;Acc:ZDB-GENE-070112-1692]
LOC101466375	cnn1	calponin 1	NC_036783.1	5453368	5466958	TF313921	CNN1	calponin 1, basic, smooth muscle [Source:HGNC Symbol;Acc:2155]	calponin 1, basic, smooth muscle, b [Source:ZFIN;Acc:ZDB-GENE-091118-54]
LOC101466924	LOC101466924	transmembrane protein 56-B%2C transcript variant X2	NC_036783.1	5484246	5505749	TF324847	TMEM56	transmembrane protein 56 [Source:HGNC Symbol;Acc:26477]	transmembrane protein 56b [Source:ZFIN;Acc:ZDB-GENE-041010-90]
LOC101467415	LOC101467415	phospholipid phosphatase-related protein type 5%2C transcript variant X4	NC_036783.1	5556617	5641256	TF316040	LPPR2_HUMAN	Lipid phosphate phosphatase-related protein type 2 [Source:UniProtKB/Swiss-Prot;Acc:Q96GM1]	lipid phosphate phosphatase-related protein type 2a [Source:ZFIN;Acc:ZDB-GENE-040426-1171]
LOC101469015	LOC101469015	uncharacterized LOC101469015%2C transcript variant X3	NC_036783.1	5667749	5690506	NoHit	NA	NA	NA
LOC101470054	LOC101470054	uncharacterized LOC101470054	NC_036783.1	5721854	5725031	TF344219	NA	NA	nuclear factor, interleukin 3 regulated, member 6 [Source:ZFIN;Acc:ZDB-GENE-040704-63]
LOC101470350	LOC101470350	putative uncharacterized protein DDB_G0287113%2C transcript variant X2	NC_036783.1	5730811	5742008	TF328374	NFIL3	nuclear factor, interleukin 3 regulated [Source:HGNC Symbol;Acc:7787]	nuclear factor, interleukin 3 regulated, member 2 [Source:ZFIN;Acc:ZDB-GENE-110929-1]
LOC101471797	LOC101471797	glutaryl-CoA dehydrogenase%2C mitochondrial	NC_036783.1	5813605	5819165	TF105051	GCDH	glutaryl-CoA dehydrogenase [Source:HGNC Symbol;Acc:4189]	glutaryl-Coenzyme A dehydrogenase [Source:ZFIN;Acc:ZDB-GENE-040426-1855]
LOC101472373	farsa	phenylalanyl-tRNA synthetase alpha subunit	NC_036783.1	5829686	5837766	TF300647	FARSA	phenylalanyl-tRNA synthetase, alpha subunit [Source:HGNC Symbol;Acc:3592]	phenylalanyl-tRNA synthetase, alpha subunit [Source:ZFIN;Acc:ZDB-GENE-050512-2]
LOC101472678	ilf3	interleukin enhancer binding factor 3%2C transcript variant X1	NC_036783.1	5839597	5853931	TF320194	ILF3	interleukin enhancer binding factor 3, 90kDa [Source:HGNC Symbol;Acc:6038]	interleukin enhancer binding factor 3b [Source:ZFIN;Acc:ZDB-GENE-030131-587]
LOC101473361	LOC101473361	prostaglandin E2 receptor EP1 subtype	NC_036783.1	5855895	5859725	TF324982	PTGER1	prostaglandin E receptor 1 (subtype EP1), 42kDa [Source:HGNC Symbol;Acc:9593]	prostaglandin E receptor 1b (subtype EP1) [Source:ZFIN;Acc:ZDB-GENE-100922-278]
LOC101487972	LOC101487972	PHD finger protein rhinoceros%2C transcript variant X1	NC_036783.1	5985049	6024175	TF105843	DHX35	DEAH (Asp-Glu-Ala-His) box polypeptide 35 [Source:HGNC Symbol;Acc:15861]	DEAH (Asp-Glu-Ala-His) box polypeptide 35 [Source:HGNC Symbol;Acc:15861]
LOC101482945	LOC101482945	transcription factor jun-B	NC_036783.1	6303564	6305406	TF323952	JUN	jun proto-oncogene [Source:HGNC Symbol;Acc:6204]	jun B proto-oncogene b [Source:ZFIN;Acc:ZDB-GENE-040426-2666]
LOC101463674	LOC101463674	riboflavin-binding protein	NC_036783.1	6320108	6332610	TF328532	FOLR1	folate receptor 1 (adult) [Source:HGNC Symbol;Acc:3791]	zgc:109949 [Source:ZFIN;Acc:ZDB-GENE-050522-166]	None	NANoHomolog
LOC101467223	LOC101467223	netrin-1	NC_036783.1	6651539	6701808	TF352481	NTN1	netrin 1 [Source:HGNC Symbol;Acc:8029]	netrin 1b [Source:ZFIN;Acc:ZDB-GENE-990415-168]
LOC101464258	LOC101464258	ubiquitin carboxyl-terminal hydrolase 43	NC_036783.1	6736107	6824816	TF106278	USP43	ubiquitin specific peptidase 43 [Source:HGNC Symbol;Acc:20072]	ubiquitin specific peptidase 43 [Source:HGNC Symbol;Acc:20072]
LOC101468128	LOC101468128	importin subunit alpha-1	NC_036783.1	6910393	6913826	TF101178	KPNA2	karyopherin alpha 2 (RAG cohort 1, importin alpha 1) [Source:HGNC Symbol;Acc:6395]	karyopherin alpha 2 (RAG cohort 1, importin alpha 1) [Source:ZFIN;Acc:ZDB-GENE-040718-22]
LOC112434769	LOC112434769	pleckstrin homology domain-containing family F member 2-like	NC_036783.1	6929586	6931044	TF315235	PLEKHF2	pleckstrin homology domain containing, family F (with FYVE domain) member 2 [Source:HGNC Symbol;Acc:20757]	pleckstrin homology domain containing, family F (with FYVE domain) member 1 [Source:ZFIN;Acc:ZDB-GENE-040426-1289]
LOC101469682	LOC101469682	E3 ubiquitin-protein ligase SMURF2%2C transcript variant X1	NC_036783.1	6935313	6988827	TF323658	SMURF2	SMAD specific E3 ubiquitin protein ligase 2 [Source:HGNC Symbol;Acc:16809]	SMAD specific E3 ubiquitin protein ligase 2 [Source:ZFIN;Acc:ZDB-GENE-030131-1830]
LOC101470648	LOC101470648	envoplakin	NC_036783.1	7004772	7018075	TF342779	EVPL	envoplakin [Source:HGNC Symbol;Acc:3503]	Uncharacterized protein [Source:UniProtKB/TrEMBL;Acc:F1QR67]
LOC101471904	LOC101471904	RNA binding protein fox-1 homolog 2%2C transcript variant X2	NC_036783.1	7147250	7202782	TF315942	RBFOX2	RNA binding protein, fox-1 homolog (C. elegans) 2 [Source:HGNC Symbol;Acc:9906]	RNA binding protein, fox-1 homolog (C. elegans) 2 [Source:ZFIN;Acc:ZDB-GENE-040426-2464]
LOC101481192	mei1	meiotic double-stranded break formation protein 1	NC_036783.1	7606178	7673628	TF336500	MEI1	meiosis inhibitor 1 [Source:HGNC Symbol;Acc:28613]	NA
LOC101482747	LOC101482747	ATP-sensitive inward rectifier potassium channel 12	NC_036783.1	7712339	7723033	TF313676	KCNJ4	potassium inwardly-rectifying channel, subfamily J, member 4 [Source:HGNC Symbol;Acc:6265]	potassium inwardly-rectifying channel, subfamily J, member 4 [Source:HGNC Symbol;Acc:6265]
LOC101485823	LOC101485823	peroxisomal membrane protein PMP34	NC_036783.1	7920976	7924415	TF324772	SLC25A17	solute carrier family 25 (mitochondrial carrier; peroxisomal membrane protein, 34kDa), member 17 [Source:HGNC Symbol;Acc:10987]	solute carrier family 25 (mitochondrial carrier, peroxisomal membrane protein), member 17 [Source:ZFIN;Acc:ZDB-GENE-070620-4]
LOC101483678	llgl1	LLGL1%2C scribble cell polarity complex component	NC_036783.1	8022987	8057806	TF314585	LLGL1	lethal giant larvae homolog 1 (Drosophila) [Source:HGNC Symbol;Acc:6628]	lethal giant larvae homolog 1 (Drosophila) [Source:ZFIN;Acc:ZDB-GENE-060825-69]
LOC101483114	LOC101483114	protein shisa-8%2C transcript variant X1	NC_036783.1	8136816	8264823	TF330800	SHISA6	shisa homolog 6 (Xenopus laevis) [Source:HGNC Symbol;Acc:34491]	shisa homolog 8 (Xenopus laevis) [Source:HGNC Symbol;Acc:18351]
LOC101482632	LOC101482632	MKL/myocardin-like protein 1%2C transcript variant X1	NC_036783.1	8321132	8359867	TF326024	MKL1	megakaryoblastic leukemia (translocation) 1 [Source:HGNC Symbol;Acc:14334]	megakaryoblastic leukemia (translocation) 1b [Source:ZFIN;Acc:ZDB-GENE-030131-681]
LOC101477587	LOC101477587	cytokine receptor common subunit beta%2C transcript variant X1	NC_036783.1	8604926	8613604	TF337996	CSF2RB	colony stimulating factor 2 receptor, beta, low-affinity (granulocyte-macrophage) [Source:HGNC Symbol;Acc:2436]	NA
LOC112434709	LOC112434709	adenylosuccinate lyase-like	NC_036783.1	8677500	8684357	TF106385	ADSL	adenylosuccinate lyase [Source:HGNC Symbol;Acc:291]	adenylosuccinate lyase [Source:ZFIN;Acc:ZDB-GENE-030131-6363]
LOC101470738	actb	actin beta	NC_036783.1	9065293	9069425	TF354237	ACTB	actin, beta [Source:HGNC Symbol;Acc:132]	actin, beta 2 [Source:ZFIN;Acc:ZDB-GENE-000329-3]
LOC101469956	slc29a4	solute carrier family 29 member 4%2C transcript variant X1	NC_036783.1	9138091	9161106	TF313950	SLC29A4	solute carrier family 29 (nucleoside transporters), member 4 [Source:HGNC Symbol;Acc:23097]	solute carrier family 29 (nucleoside transporters), member 4 [Source:ZFIN;Acc:ZDB-GENE-070112-1932]
LOC101468822	pdap1	PDGFA associated protein 1	NC_036783.1	9207554	9212160	TF324338	PDAP1	PDGFA associated protein 1 [Source:HGNC Symbol;Acc:14634]	pdgfa associated protein 1b [Source:ZFIN;Acc:ZDB-GENE-040426-942]
LOC101465488	prkcb	protein kinase C beta%2C transcript variant X1	NC_036783.1	9445158	9551853	TF351133	PRKCB	protein kinase C, beta [Source:HGNC Symbol;Acc:9395]	protein kinase C, beta b [Source:ZFIN;Acc:ZDB-GENE-040426-1178]
LOC101465207	socs1	suppressor of cytokine signaling 1	NC_036783.1	9584214	9586042	TF321368	SOCS1	suppressor of cytokine signaling 1 [Source:HGNC Symbol;Acc:19383]	suppressor of cytokine signaling 1a [Source:ZFIN;Acc:ZDB-GENE-040801-205]
LOC101485006	ciita	class II major histocompatibility complex transactivator%2C transcript variant X1	NC_036783.1	9657090	9677481	TF352118	CIITA	class II, major histocompatibility complex, transactivator [Source:HGNC Symbol;Acc:7067]	class II, major histocompatibility complex, transactivator [Source:ZFIN;Acc:ZDB-GENE-071116-6]
LOC111500382	LOC111500382	5S ribosomal RNA	NC_036783.1	9919888	9920006	NA	NA	NA	NA
LOC112434773	LOC112434773	uncharacterized LOC112434773	NC_036783.1	10060443	10061207	NA	NA	NA	NA
LOC101485837	grin2a	glutamate ionotropic receptor NMDA type subunit 2A	NC_036783.1	10139893	10319271	TF314731	GRIN2A	glutamate receptor, ionotropic, N-methyl D-aspartate 2A [Source:HGNC Symbol;Acc:4585]	glutamate receptor, ionotropic, N-methyl D-aspartate 2A, a [Source:ZFIN;Acc:ZDB-GENE-070424-129]
LOC112434711	LOC112434711	uncharacterized LOC112434711	NC_036783.1	10327002	10332782	NoHit	NA	NA	NA
LOC101485565	LOC101485565	voltage-dependent T-type calcium channel subunit alpha-1I%2C transcript variant X1	NC_036783.1	10365644	10425950	TF313555	CACNA1H	calcium channel, voltage-dependent, T type, alpha 1H subunit [Source:HGNC Symbol;Acc:1395]	Uncharacterized protein [Source:UniProtKB/TrEMBL;Acc:F1RAM5]
LOC112434712	LOC112434712	uncharacterized LOC112434712	NC_036783.1	10475339	10495995	TF313555	CACNA1I	calcium channel, voltage-dependent, T type, alpha 1I subunit [Source:HGNC Symbol;Acc:1396]	calcium channel, voltage-dependent, T type, alpha 1I subunit [Source:ZFIN;Acc:ZDB-GENE-060503-324]
LOC101483709	LOC101483709	protein FAM83G%2C transcript variant X1	NC_036783.1	10660246	10676522	TF330777	FAM83G	family with sequence similarity 83, member G [Source:HGNC Symbol;Acc:32554]	Uncharacterized protein [Source:UniProtKB/TrEMBL;Acc:E7F4B5]
LOC101483399	LOC101483399	sphingosine kinase 1	NC_036783.1	10755870	10774191	TF354296	SPHK1	sphingosine kinase 1 [Source:HGNC Symbol;Acc:11240]	sphingosine kinase 1 [Source:HGNC Symbol;Acc:11240]
LOC101480711	LOC101480711	alpha-1%2C6-mannosylglycoprotein 6-beta-N-acetylglucosaminyltransferase B	NC_036783.1	10855899	10928065	TF313714	MGAT5B	mannosyl (alpha-1,6-)-glycoprotein beta-1,6-N-acetyl-glucosaminyltransferase, isozyme B [Source:HGNC Symbol;Acc:24140]	mannosyl (alpha-1,6-)-glycoprotein beta-1,6-N-acetyl-glucosaminyltransferase, isozyme B [Source:HGNC Symbol;Acc:24140]
LOC101480418	LOC101480418	SEC14-like protein 1	NC_036783.1	10949279	10963147	TF313988	SEC14L1	SEC14-like 1 (S. cerevisiae) [Source:HGNC Symbol;Acc:10698]	SEC14-like 1 (S. cerevisiae) [Source:ZFIN;Acc:ZDB-GENE-040426-801]
LOC101474234	LOC101474234	mitogen-activated protein kinase 1	NC_036783.1	11390046	11402852	TF105097	MAPK3	mitogen-activated protein kinase 3 [Source:HGNC Symbol;Acc:6877]	mitogen-activated protein kinase 3 [Source:ZFIN;Acc:ZDB-GENE-040121-1]
LOC112434713	LOC112434713		NC_036783.1	11568153	11568614	NA	NA	NA	NA
LOC111500365	LOC111500365		NC_036783.1	11587032	11587547	NA	NA	NA	NA
LOC112434714	LOC112434714		NC_036783.1	11798940	11803651	NA	NA	NA	NA
LOC101488032	LOC101488032		NC_036783.1	12144320	12144767	NA	NA	NA	NA
LOC101481442	sez6l2	seizure related 6 homolog like 2%2C transcript variant X1	NC_036783.1	12318877	12337222	TF330037	SEZ6L2	seizure related 6 homolog (mouse)-like 2 [Source:HGNC Symbol;Acc:30844]	seizure related 6 homolog like 2 [Source:ZFIN;Acc:ZDB-GENE-091204-189]
LOC101487637	LOC101487637	trichohyalin%2C transcript variant X1	NC_036783.1	12501124	12516756	TF329258	MPRIP	myosin phosphatase Rho interacting protein [Source:HGNC Symbol;Acc:30321]	myosin phosphatase Rho interacting protein [Source:HGNC Symbol;Acc:30321]
LOC101486431	LOC101486431	sterile alpha motif domain-containing protein 9-like	NC_036783.1	12708436	12721685	TF331842	SAMD9L	sterile alpha motif domain containing 9-like [Source:HGNC Symbol;Acc:1349]	Uncharacterized protein [Source:UniProtKB/TrEMBL;Acc:F1Q795]
LOC111501048	LOC111501048	uncharacterized LOC111501048	NC_036783.1	12886124	12892880	NA	NA	NA	NA
LOC101486715	LOC101486715	myeloid-associated differentiation marker homolog	NC_036783.1	12986881	12994444	TF331088	MYADML2	myeloid-associated differentiation marker-like 2 [Source:HGNC Symbol;Acc:34548]	Uncharacterized protein [Source:UniProtKB/TrEMBL;Acc:E7F5U7]
LOC101487000	LOC101487000	interferon-induced protein 44-like	NC_036783.1	13020566	13030587	TF328728	IFI44	interferon-induced protein 44 [Source:HGNC Symbol;Acc:16938]	si:dkeyp-75b4.9 [Source:ZFIN;Acc:ZDB-GENE-090313-396]
LOC112434778	LOC112434778	uncharacterized LOC112434778	NC_036783.1	13031272	13031826	NA	NA	NA	NA
LOC106675553	LOC106675553		NC_036783.1	13043457	13044471	NA	NA	NA	NA
LOC101478983	elfn2	extracellular leucine rich repeat and fibronectin type III domain containing 2%2C transcript variant X1	NC_036783.1	13669279	13738805	TF332887	ELFN2	extracellular leucine-rich repeat and fibronectin type III domain containing 2 [Source:HGNC Symbol;Acc:29396]	extracellular leucine-rich repeat and fibronectin type III domain containing 2 [Source:HGNC Symbol;Acc:29396]
LOC101479916	alkbh7	alkB homolog 7	NC_036783.1	13783479	13785316	TF314197	ALKBH7	alkB, alkylation repair homolog 7 (E. coli) [Source:HGNC Symbol;Acc:21306]	alkB, alkylation repair homolog 7 (E. coli) [Source:ZFIN;Acc:ZDB-GENE-050417-78]
LOC112434738	LOC112434738	nuclear pore complex protein Nup85-like	NC_036783.1	14337522	14345947	TF323240	NUP85	nucleoporin 85kDa [Source:HGNC Symbol;Acc:8734]	nucleoporin 85 [Source:ZFIN;Acc:ZDB-GENE-040801-145]
LOC101482453	LOC101482453	voltage-dependent calcium channel gamma-1 subunit-like	NC_036783.1	14487011	14503912	TF331651	CACNG1	calcium channel, voltage-dependent, gamma subunit 1 [Source:HGNC Symbol;Acc:1405]	Uncharacterized protein [Source:UniProtKB/TrEMBL;Acc:E7F1R5]
LOC101481380	aimp2	aminoacyl tRNA synthetase complex interacting multifunctional protein 2%2C transcript variant X1	NC_036783.1	14533041	14537140	TF326322	AIMP2	aminoacyl tRNA synthetase complex-interacting multifunctional protein 2 [Source:HGNC Symbol;Acc:20609]	aminoacyl tRNA synthetase complex-interacting multifunctional protein 2 [Source:ZFIN;Acc:ZDB-GENE-040426-2652]
LOC101480509	LOC101480509	parvalbumin beta	NC_036783.1	14561316	14563653	TF332342	PVALB	parvalbumin [Source:HGNC Symbol;Acc:9704]	parvalbumin 1 [Source:ZFIN;Acc:ZDB-GENE-040625-57]
LOC101480216	LOC101480216	parvalbumin beta	NC_036783.1	14567440	14570260	TF332342	PVALB	parvalbumin [Source:HGNC Symbol;Acc:9704]	parvalbumin 5 [Source:ZFIN;Acc:ZDB-GENE-050417-336]
LOC101479739	lmtk2	lemur tyrosine kinase 2	NC_036783.1	14571257	14605832	TF332280	LMTK2	lemur tyrosine kinase 2 [Source:HGNC Symbol;Acc:17880]	lemur tyrosine kinase 2 [Source:ZFIN;Acc:ZDB-GENE-100812-11]
LOC101478051	LOC101478051	brain-specific angiogenesis inhibitor 1-associated protein 2-like protein 1%2C transcript variant X1	NC_036783.1	14630805	14657243	TF325648	BAIAP2L1	BAI1-associated protein 2-like 1 [Source:HGNC Symbol;Acc:21649]	BAI1-associated protein 2-like 1b [Source:ZFIN;Acc:ZDB-GENE-050417-371]
LOC101477389	LOC101477389	neuronal pentraxin-2%2C transcript variant X1	NC_036783.1	14672250	14686262	TF330208	NPTX2	neuronal pentraxin II [Source:HGNC Symbol;Acc:7953]	neuronal pentraxin 2a [Source:ZFIN;Acc:ZDB-GENE-060707-1]
LOC106675606	LOC106675606	uncharacterized LOC106675606	NC_036783.1	14883904	14884425	NA	NA	NA	NA
LOC101477115	LOC101477115	extracellular serine/threonine protein kinase FAM20C	NC_036783.1	14990122	15037632	TF313276	FAM20C	family with sequence similarity 20, member C [Source:HGNC Symbol;Acc:22140]	si:ch73-266a4.1 [Source:ZFIN;Acc:ZDB-GENE-121214-201]
LOC101476641	LOC101476641	retinoic acid-induced protein 1	NC_036783.1	15044108	15101882	TF331317	RAI1	retinoic acid induced 1 [Source:HGNC Symbol;Acc:9834]	retinoic acid induced 1 [Source:HGNC Symbol;Acc:9834]
LOC112434781	ndufb10	NADH:ubiquinone oxidoreductase subunit B10	NC_036783.1	15206046	15208215	TF105792	NDUFB10	NADH dehydrogenase (ubiquinone) 1 beta subcomplex, 10, 22kDa [Source:HGNC Symbol;Acc:7696]	NADH dehydrogenase (ubiquinone) 1 beta subcomplex, 10 [Source:ZFIN;Acc:ZDB-GENE-040426-1691]
LOC112434689	rpl3l	ribosomal protein L3 like	NC_036783.1	15209150	15213071	TF300555	RPL3L	ribosomal protein L3-like [Source:HGNC Symbol;Acc:10351]	ribosomal protein L3 [Source:ZFIN;Acc:ZDB-GENE-030131-1291]
LOC101484712	LOC101484712	delphilin%2C transcript variant X1	NC_036783.1	15313387	15344097	TF329416	GRID2IP	glutamate receptor, ionotropic, delta 2 (Grid2) interacting protein [Source:HGNC Symbol;Acc:18464]	glutamate receptor, ionotropic, delta 2 (Grid2) interacting protein, a [Source:ZFIN;Acc:ZDB-GENE-091113-42]
LOC101487768	cep112	centrosomal protein 112%2C transcript variant X2	NC_036783.1	15649091	15778595	TF328995	CEP112	centrosomal protein 112kDa [Source:HGNC Symbol;Acc:28514]	NA
LOC101487097	LOC101487097	protein kinase C alpha type%2C transcript variant X1	NC_036783.1	15779107	15896427	TF351133	PRKCA	protein kinase C, alpha [Source:HGNC Symbol;Acc:9393]	protein kinase C, alpha [Source:ZFIN;Acc:ZDB-GENE-050208-100]
LOC101481379	tmem159	transmembrane protein 159	NC_036783.1	16140137	16142782	TF335782	TMEM159	transmembrane protein 159 [Source:HGNC Symbol;Acc:30136]	NA
LOC101475464	prkar1b	protein kinase cAMP-dependent type I regulatory subunit beta%2C transcript variant X1	NC_036783.1	16528143	16594521	TF314920	PRKAR1B	protein kinase, cAMP-dependent, regulatory, type I, beta [Source:HGNC Symbol;Acc:9390]	protein kinase, cAMP-dependent, regulatory, type I, beta [Source:ZFIN;Acc:ZDB-GENE-060929-580]
LOC101487393	glis2	GLIS family zinc finger 2	NC_036783.1	16771320	16803471	TF351425	GLIS2	GLIS family zinc finger 2 [Source:HGNC Symbol;Acc:29450]	Uncharacterized protein [Source:UniProtKB/TrEMBL;Acc:E7F093]
LOC101479263	LOC101479263	mitochondrial import inner membrane translocase subunit TIM16%2C transcript variant X1	NC_036783.1	16803662	16925355	TF314280	CORO7	coronin 7 [Source:HGNC Symbol;Acc:26161]	coronin 7 [Source:ZFIN;Acc:ZDB-GENE-050706-137]
LOC101478521	LOC101478521	dnaJ homolog subfamily A member 3%2C mitochondrial%2C transcript variant X2	NC_036783.1	16925681	16930753	TF105152	DNAJA3	DnaJ (Hsp40) homolog, subfamily A, member 3 [Source:HGNC Symbol;Acc:11808]	DnaJ (Hsp40) homolog, subfamily A, member 3A [Source:ZFIN;Acc:ZDB-GENE-030131-7837]
LOC101481566	abca3	ATP binding cassette subfamily A member 3%2C transcript variant X1	NC_036783.1	16990166	17026147	TF105191	ABCA3	ATP-binding cassette, sub-family A (ABC1), member 3 [Source:HGNC Symbol;Acc:33]	ATP-binding cassette, sub-family A (ABC1), member 3b [Source:ZFIN;Acc:ZDB-GENE-050517-2]
LOC101484532	sox8	SRY-box 8	NC_036783.1	17241638	17243830	TF351735	SOX2	SRY (sex determining region Y)-box 2 [Source:HGNC Symbol;Acc:11195]	SRY (sex determining region Y)-box 8 [Source:HGNC Symbol;Acc:11203]
LOC101485655	LOC101485655	somatostatin receptor type 2	NC_036783.1	17339050	17344525	TF315737	SSTR2	somatostatin receptor 2 [Source:HGNC Symbol;Acc:11331]	somatostatin receptor 2 [Source:HGNC Symbol;Acc:11331]
LOC101485925	LOC101485925	uncharacterized LOC101485925	NC_036783.1	17417284	17464137	NA	NA	NA	NA
LOC101486143	LOC101486143	transcription factor Sox-9	NC_036783.1	17504357	17508233	TF351735	SOX2	SRY (sex determining region Y)-box 2 [Source:HGNC Symbol;Acc:11195]	SRY (sex determining region Y)-box 8 [Source:HGNC Symbol;Acc:11203]
LOC101487863	LOC101487863	transcription factor MafG%2C transcript variant X1	NC_036783.1	17706850	17722121	TF325689	MAFG	v-maf musculoaponeurotic fibrosarcoma oncogene homolog G (avian) [Source:HGNC Symbol;Acc:6781]	v-maf musculoaponeurotic fibrosarcoma oncogene family, protein g (avian), 1 [Source:ZFIN;Acc:ZDB-GENE-040624-7]
LOC101463955	LOC101463955	pyrroline-5-carboxylate reductase 1%2C mitochondrial%2C transcript variant X2	NC_036783.1	17722330	17725562	TF335538	NOXRED1	NADP-dependent oxidoreductase domain containing 1 [Source:HGNC Symbol;Acc:20487]	Uncharacterized protein [Source:UniProtKB/TrEMBL;Acc:E7EZS9]
LOC101464626	LOC101464626	myeloid-associated differentiation marker-like protein 2	NC_036783.1	17726656	17729112	TF331088	MYADML2	myeloid-associated differentiation marker-like 2 [Source:HGNC Symbol;Acc:34548]	myeloid-associated differentiation marker-like 2 [Source:HGNC Symbol;Acc:34548]
LOC101468895	socs3	suppressor of cytokine signaling 3	NC_036783.1	17907269	17909784	TF321368	SOCS3	suppressor of cytokine signaling 3 [Source:HGNC Symbol;Acc:19391]	suppressor of cytokine signaling 3a [Source:ZFIN;Acc:ZDB-GENE-030131-7349]
LOC101469204	LOC101469204	transmembrane protein 235%2C transcript variant X1	NC_036783.1	17950406	17956696	TF327980	TMEM235	transmembrane protein 235 [Source:HGNC Symbol;Acc:27563]	transmembrane protein 235 [Source:HGNC Symbol;Acc:27563]
LOC101469952	LOC101469952	BAH and coiled-coil domain-containing protein 1%2C transcript variant X1	NC_036783.1	17991890	18053697	TF336007	BAHCC1	BAH domain and coiled-coil containing 1 [Source:HGNC Symbol;Acc:29279]	BAH domain and coiled-coil containing 1 [Source:HGNC Symbol;Acc:29279]
LOC101470236	LOC101470236	protein FAM104A	NC_036783.1	18076323	18080834	NoHit	NA	NA	NA
LOC101472854	LOC101472854	inward rectifier potassium channel 2	NC_036783.1	18132603	18138036	TF313676	KCNJ2	potassium inwardly-rectifying channel, subfamily J, member 2 [Source:HGNC Symbol;Acc:6263]	potassium inwardly-rectifying channel, subfamily J, member 2 [Source:HGNC Symbol;Acc:6263]
LOC101473145	LOC101473145	dual specificity mitogen-activated protein kinase kinase 6	NC_036783.1	18156516	18169441	TF350701	MAP2K6	mitogen-activated protein kinase kinase 6 [Source:HGNC Symbol;Acc:6846]	mitogen-activated protein kinase kinase 6 [Source:ZFIN;Acc:ZDB-GENE-010202-3]
LOC101473443	LOC101473443	BTB/POZ domain-containing protein 17	NC_036783.1	18169522	18173818	TF331368	BTBD17	BTB (POZ) domain containing 17 [Source:HGNC Symbol;Acc:33758]	BTB (POZ) domain containing 17 [Source:HGNC Symbol;Acc:33758]
LOC101473729	LOC101473729	G-protein coupled receptor family C group 5 member C%2C transcript variant X1	NC_036783.1	18180031	18183784	TF321410	GPRC5C	G protein-coupled receptor, family C, group 5, member C [Source:HGNC Symbol;Acc:13309]	G protein-coupled receptor, family C, group 5, member C [Source:ZFIN;Acc:ZDB-GENE-070928-27]
LOC101474602	LOC101474602	tumor necrosis factor ligand superfamily member 14%2C transcript variant X1	NC_036783.1	18579936	18582895	TF332169	TNFSF14	tumor necrosis factor (ligand) superfamily, member 14 [Source:HGNC Symbol;Acc:11930]	tumor necrosis factor (ligand) superfamily, member 10 [Source:ZFIN;Acc:ZDB-GENE-040718-335]
LOC105941098	LOC105941098	uncharacterized LOC105941098	NC_036783.1	18587297	18591266	NoHit	NA	NA	NA
LOC101474878	LOC101474878	phospholipid phosphatase 3	NC_036783.1	18598291	18614457	TF316040	PPAP2B	phosphatidic acid phosphatase type 2B [Source:HGNC Symbol;Acc:9229]	zgc:158309 [Source:ZFIN;Acc:ZDB-GENE-061201-42]
LOC101475465	LOC101475465	adhesion G protein-coupled receptor L1%2C transcript variant X1	NC_036783.1	18631432	18795929	TF351999	LPHN1	latrophilin 1 [Source:HGNC Symbol;Acc:20973]	latrophilin 1 [Source:HGNC Symbol;Acc:20973]
LOC105941096	LOC105941096	adhesion G protein-coupled receptor E1	NC_036783.1	18800912	18825474	TF316380	CD97	CD97 molecule [Source:HGNC Symbol;Acc:1711]	CD97 molecule [Source:HGNC Symbol;Acc:1711]
LOC101484431	LOC101484431	bromodomain-containing protein 4%2C transcript variant X1	NC_036783.1	18952231	18989732	TF317345	BRD4	bromodomain containing 4 [Source:HGNC Symbol;Acc:13575]	bromodomain containing 4 [Source:ZFIN;Acc:ZDB-GENE-030131-267]
LOC101468597	LOC101468597		NC_036783.1	19030488	19068982	NA	NA	NA	NA
LOC106675073	LOC106675073	myosin heavy chain%2C fast skeletal muscle-like	NC_036783.1	19033281	19034281	TF314375	MYH1	myosin, heavy chain 1, skeletal muscle, adult [Source:HGNC Symbol;Acc:7567]	myosin, heavy chain 13, skeletal muscle [Source:HGNC Symbol;Acc:7571]
LOC112434749	LOC112434749	uncharacterized LOC112434749	NC_036783.1	19107879	19111767	TF354128	NA	NA	Uncharacterized protein [Source:UniProtKB/TrEMBL;Acc:F1R9M4]
LOC101482437	LOC101482437	myosin heavy chain%2C fast skeletal muscle%2C transcript variant X1	NC_036783.1	19128094	19153759	TF314375	MYH1	myosin, heavy chain 1, skeletal muscle, adult [Source:HGNC Symbol;Acc:7567]	myosin, heavy chain 13, skeletal muscle [Source:HGNC Symbol;Acc:7571]
LOC101484507	LOC101484507	neurogenic locus notch homolog protein 2%2C transcript variant X1	NC_036783.1	19243134	19270713	TF351641	NOTCH3	notch 3 [Source:HGNC Symbol;Acc:7883]	notch homolog 3 [Source:ZFIN;Acc:ZDB-GENE-000329-5]
LOC101484786	LOC101484786	retinol dehydrogenase 8	NC_036783.1	19302965	19309527	TF105451	RDH8	retinol dehydrogenase 8 (all-trans) [Source:HGNC Symbol;Acc:14423]	retinol dehydrogenase 8a [Source:ZFIN;Acc:ZDB-GENE-021115-3]
LOC101485068	LOC101485068	collagen alpha-1(XI) chain%2C transcript variant X1	NC_036783.1	19319904	19363670	TF323987	COL5A3	collagen, type V, alpha 3 [Source:HGNC Symbol;Acc:14864]	collagen, type V, alpha 3b [Source:ZFIN;Acc:ZDB-GENE-110728-4]
LOC101485542	olfm2	olfactomedin 2%2C transcript variant X1	NC_036783.1	19382996	19428890	TF315964	OLFM2	olfactomedin 2 [Source:HGNC Symbol;Acc:17189]	olfactomedin 2a [Source:ZFIN;Acc:ZDB-GENE-040426-2882]
LOC101487075	LOC101487075	intercellular adhesion molecule 1%2C transcript variant X1	NC_036783.1	19513719	19524611	TF333745	ICAM5	intercellular adhesion molecule 5, telencephalin [Source:HGNC Symbol;Acc:5348]	Uncharacterized protein [Source:UniProtKB/TrEMBL;Acc:E7F9T6]
LOC101465962	s1pr2	sphingosine-1-phosphate receptor 2	NC_036783.1	19609788	19626338	TF330052	S1PR2_HUMAN	Sphingosine 1-phosphate receptor 2 [Source:UniProtKB/Swiss-Prot;Acc:O95136]	sphingosine-1-phosphate receptor 2 [Source:ZFIN;Acc:ZDB-GENE-020123-2]
LOC101468300	tyk2	tyrosine kinase 2	NC_036783.1	19707746	19717013	TF327041	TYK2	tyrosine kinase 2 [Source:HGNC Symbol;Acc:12440]	tyrosine kinase 2 [Source:ZFIN;Acc:ZDB-GENE-071116-4]
LOC112434786	LOC112434786		NC_036783.1	19936514	19943331	NA	NA	NA	NA
LOC101482232	igfals	insulin like growth factor binding protein acid labile subunit	NC_036783.1	20152827	20155266	TF351124	IGFALS	insulin-like growth factor binding protein, acid labile subunit [Source:HGNC Symbol;Acc:5468]	insulin-like growth factor binding protein, acid labile subunit [Source:HGNC Symbol;Acc:5468]
LOC101484509	LOC101484509	ubiquitin carboxyl-terminal hydrolase 31	NC_036783.1	20316058	20331359	TF106278	USP31	ubiquitin specific peptidase 31 [Source:HGNC Symbol;Acc:20060]	Ubiquitin carboxyl-terminal hydrolase [Source:UniProtKB/TrEMBL;Acc:E7F6P1]
LOC101484787	LOC101484787	heparan sulfate glucosamine 3-O-sulfotransferase 2	NC_036783.1	20373583	20407848	TF350755	HS3ST2	heparan sulfate (glucosamine) 3-O-sulfotransferase 2 [Source:HGNC Symbol;Acc:5195]	heparan sulfate (glucosamine) 3-O-sulfotransferase 2 [Source:ZFIN;Acc:ZDB-GENE-070202-7]
LOC105940923	LOC105940923	uncharacterized LOC105940923	NC_036783.1	20389966	20392270	NA	NA	NA	NA
LOC101485069	LOC101485069	heparan sulfate glucosamine 3-O-sulfotransferase 4	NC_036783.1	20476376	20569445	TF350755	HS3ST4	heparan sulfate (glucosamine) 3-O-sulfotransferase 4 [Source:HGNC Symbol;Acc:5200]	heparan sulfate (glucosamine) 3-O-sulfotransferase 4 [Source:ZFIN;Acc:ZDB-GENE-070202-8]
LOC101485357	kdm8	lysine demethylase 8	NC_036783.1	20707622	20713710	TF315056	KDM8	lysine (K)-specific demethylase 8 [Source:HGNC Symbol;Acc:25840]	lysine (K)-specific demethylase 8 [Source:ZFIN;Acc:ZDB-GENE-040718-411]
LOC101464602	tmem184a	transmembrane protein 184A%2C transcript variant X1	NC_036783.1	21013977	21034773	TF314160	TMEM184A	transmembrane protein 184A [Source:HGNC Symbol;Acc:28797]	transmembrane protein 184a [Source:ZFIN;Acc:ZDB-GENE-040426-2925]
LOC101465657	elfn1	extracellular leucine rich repeat and fibronectin type III domain containing 1	NC_036783.1	21095185	21180024	TF332887	ELFN1	extracellular leucine-rich repeat and fibronectin type III domain containing 1 [Source:HGNC Symbol;Acc:33154]	extracellular leucine-rich repeat and fibronectin type III domain containing 1 [Source:HGNC Symbol;Acc:33154]
LOC101469473	gpatch8	G-patch domain containing 8%2C transcript variant X2	NC_036783.1	21415677	21444409	TF332138	GPATCH8	G patch domain containing 8 [Source:HGNC Symbol;Acc:29066]	G patch domain containing 8 [Source:ZFIN;Acc:ZDB-GENE-030131-6966]
LOC101470912	gosr2	golgi SNAP receptor complex member 2	NC_036783.1	21444703	21448875	TF313702	GOSR2	golgi SNAP receptor complex member 2 [Source:HGNC Symbol;Acc:4431]	golgi SNAP receptor complex member 2 [Source:ZFIN;Acc:ZDB-GENE-030131-3290]
LOC112429979	LOC112429979		NC_036783.1	21491498	21573906	NA	NA	NA	NA
LOC101474009	cntnap1	contactin associated protein 1	NC_036783.1	21748469	21766624	TF321823	CNTNAP1	contactin associated protein 1 [Source:HGNC Symbol;Acc:8011]	contactin associated protein 1 [Source:HGNC Symbol;Acc:8011]
LOC101475747	LOC101475747	bryoporin	NC_036783.1	21798107	21800672	TF344188	NA	NA	actinoporin-like protein [Source:ZFIN;Acc:ZDB-GENE-030131-8907]
LOC101476036	LOC101476036	C1q-related factor	NC_036783.1	21854955	21870708	TF329591	C1QL1	complement component 1, q subcomponent-like 1 [Source:HGNC Symbol;Acc:24182]	complement component 1, q subcomponent-like 3b [Source:ZFIN;Acc:ZDB-GENE-040426-1836]
LOC101479612	LOC101479612	serine/threonine-protein kinase 17A	NC_036783.1	22015089	22026105	TF314166	STK17B	serine/threonine kinase 17b [Source:HGNC Symbol;Acc:11396]	zgc:153952 [Source:ZFIN;Acc:ZDB-GENE-061103-427]
LOC101481158	LOC101481158	inactive phospholipase C-like protein 2	NC_036783.1	22148614	22218578	TF313216	PLCL2	phospholipase C-like 2 [Source:HGNC Symbol;Acc:9064]	si:ch211-210g13.5 [Source:ZFIN;Acc:ZDB-GENE-030131-5675]
LOC101482714	LOC101482714	uncharacterized LOC101482714	NC_036783.1	22281559	22289835	NA	NA	NA	NA
LOC101482915	znf385c	zinc finger protein 385C%2C transcript variant X2	NC_036783.1	22301681	22450750	TF326622	ZNF385C	zinc finger protein 385C [Source:HGNC Symbol;Acc:33722]	zinc finger protein 385C [Source:HGNC Symbol;Acc:33722]
LOC101487267	LOC101487267	SH3 and cysteine-rich domain-containing protein 2	NC_036783.1	22587940	22615616	TF332878	STAC2	SH3 and cysteine rich domain 2 [Source:HGNC Symbol;Acc:23990]	SH3 and cysteine rich domain [Source:HGNC Symbol;Acc:11353]
LOC101487936	fbxl20	F-box and leucine rich repeat protein 20%2C transcript variant X1	NC_036783.1	22618217	22635040	TF313434	FBXL20	F-box and leucine-rich repeat protein 20 [Source:HGNC Symbol;Acc:24679]	F-box and leucine-rich repeat protein 20 [Source:ZFIN;Acc:ZDB-GENE-081031-27]
LOC101467289	LOC101467289	integrin beta-3	NC_036783.1	22772708	22783512	TF105392	ITGB3	integrin, beta 3 (platelet glycoprotein IIIa, antigen CD61) [Source:HGNC Symbol;Acc:6156]	integrin beta 3a [Source:ZFIN;Acc:ZDB-GENE-071207-1]
LOC101468579	mrc2	mannose receptor C type 2%2C transcript variant X1	NC_036783.1	22809576	22835515	TF316663	MRC2	mannose receptor, C type 2 [Source:HGNC Symbol;Acc:16875]	Uncharacterized protein [Source:UniProtKB/TrEMBL;Acc:E7F250]
LOC101469385	LOC101469385	synaptic vesicle membrane protein VAT-1 homolog	NC_036783.1	22925679	22952966	TF314255	VAT1	vesicle amine transport protein 1 homolog (T. californica) [Source:HGNC Symbol;Acc:16919]	vesicle amine transport protein 1 homolog (T californica) [Source:ZFIN;Acc:ZDB-GENE-030616-178]
LOC101470414	znf652	zinc finger protein 652	NC_036783.1	22971483	22989351	TF332655	ZNF652	zinc finger protein 652 [Source:HGNC Symbol;Acc:29147]	zinc finger protein 652 [Source:ZFIN;Acc:ZDB-GENE-030131-5857]
LOC101481159	LOC101481159	uncharacterized threonine-rich GPI-anchored glycoprotein PJ4664.02%2C transcript variant X1	NC_036783.1	23570701	23589237	TF335941	HEG1	HEG homolog 1 (zebrafish) [Source:HGNC Symbol;Acc:29227]	heart of glass [Source:ZFIN;Acc:ZDB-GENE-040714-1]
LOC101482716	asic2	acid sensing ion channel subunit 2%2C transcript variant X1	NC_036783.1	23647214	24053029	TF330663	ASIC2	acid-sensing (proton-gated) ion channel 2 [Source:HGNC Symbol;Acc:99]	acid-sensing (proton-gated) ion channel 2 [Source:ZFIN;Acc:ZDB-GENE-040513-4]
LOC101483567	lg4h17orf53	linkage group 4 C17orf53 homolog	NC_036783.1	24058185	24068401	TF331108	C17orf53	chromosome 17 open reading frame 53 [Source:HGNC Symbol;Acc:28460]	chromosome 17 open reading frame 53 [Source:HGNC Symbol;Acc:28460]
LOC101483877	asb16	ankyrin repeat and SOCS box containing 16%2C transcript variant X1	NC_036783.1	24068449	24074265	TF333494	ASB16	ankyrin repeat and SOCS box containing 16 [Source:HGNC Symbol;Acc:19768]	ankyrin repeat and SOCS box-containing 16 [Source:ZFIN;Acc:ZDB-GENE-031031-3]
LOC101487846	LOC101487846	speckle-type POZ protein%2C transcript variant X2	NC_036783.1	24343172	24440013	TF313419	SPOP	speckle-type POZ protein [Source:HGNC Symbol;Acc:11254]	speckle-type POZ protein [Source:HGNC Symbol;Acc:11254]
LOC112434760	LOC112434760	3 beta-hydroxysteroid dehydrogenase type 7-like	NC_036783.1	24678035	24686357	TF354279	HSD3B7	hydroxy-delta-5-steroid dehydrogenase, 3 beta- and steroid delta-isomerase 7 [Source:HGNC Symbol;Acc:18324]	hydroxy-delta-5-steroid dehydrogenase, 3 beta- and steroid delta-isomerase [Source:ZFIN;Acc:ZDB-GENE-030131-5673]
LOC101471970	LOC101471970	uncharacterized LOC101471970	NC_036783.1	24754296	24766420	TF328446	PRR14L	proline rich 14-like [Source:HGNC Symbol;Acc:28738]	NA
LOC101475255	LOC101475255	cytochrome c oxidase subunit 6A%2C mitochondrial	NC_036783.1	24813735	24814944	TF105064	COX6A2	cytochrome c oxidase subunit VIa polypeptide 2 [Source:HGNC Symbol;Acc:2279]	cytochrome c oxidase subunit VIa polypeptide 2 [Source:ZFIN;Acc:ZDB-GENE-040912-129]
LOC101475554	LOC101475554	glycine-rich cell wall structural protein 1.8%2C transcript variant X1	NC_036783.1	24826588	24843025	NoHit	NA	NA	NA
LOC101476722	LOC101476722	progestin and adipoQ receptor family member 4	NC_036783.1	24871558	24888914	TF323692	PAQR4	progestin and adipoQ receptor family member IV [Source:HGNC Symbol;Acc:26386]	Uncharacterized protein [Source:UniProtKB/TrEMBL;Acc:E7EYL0]
LOC101477563	LOC101477563	serine/threonine-protein phosphatase alpha-2 isoform	NC_036783.1	24916359	24931143	TF354243	PPP1CA	protein phosphatase 1, catalytic subunit, alpha isozyme [Source:HGNC Symbol;Acc:9281]	protein phosphatase 1, catalytic subunit, alpha isoform a [Source:ZFIN;Acc:ZDB-GENE-040516-3]
LOC101477849	LOC101477849	uncharacterized LOC101477849	NC_036783.1	24937990	24953032	TF106433	SUV420H2	suppressor of variegation 4-20 homolog 2 (Drosophila) [Source:HGNC Symbol;Acc:28405]	suppressor of variegation 4-20 homolog 2 (Drosophila) [Source:ZFIN;Acc:ZDB-GENE-080523-2]
LOC101478122	shank1	SH3 and multiple ankyrin repeat domains 1%2C transcript variant X1	NC_036783.1	24961899	25064714	TF324593	SHANK1	SH3 and multiple ankyrin repeat domains 1 [Source:HGNC Symbol;Acc:15474]	SH3 and multiple ankyrin repeat domains 1 [Source:HGNC Symbol;Acc:15474]
LOC101478592	LOC101478592	protein kinase C and casein kinase substrate in neurons protein 3%2C transcript variant X1	NC_036783.1	25069928	25089357	TF313677	PACSIN3	protein kinase C and casein kinase substrate in neurons 3 [Source:HGNC Symbol;Acc:8572]	si:ch211-51c14.1 [Source:ZFIN;Acc:ZDB-GENE-120215-48]
LOC101479065	syt3	synaptotagmin 3	NC_036783.1	25114302	25158938	TF315600	SYT3	synaptotagmin III [Source:HGNC Symbol;Acc:11511]	synaptotagmin III [Source:ZFIN;Acc:ZDB-GENE-090601-1]
LOC101480394	lrrc4b	leucine rich repeat containing 4B	NC_036783.1	25207795	25252439	TF324303	LRRC4B	leucine rich repeat containing 4B [Source:HGNC Symbol;Acc:25042]	leucine rich repeat containing 4Ba [Source:ZFIN;Acc:ZDB-GENE-080327-25]
LOC101480691	mybpc2	myosin binding protein C%2C fast type	NC_036783.1	25283146	25351155	TF351819	MYBPC2	myosin binding protein C, fast type [Source:HGNC Symbol;Acc:7550]	myosin binding protein C, fast type a [Source:ZFIN;Acc:ZDB-GENE-060901-1]
LOC101480974	emc10	ER membrane protein complex subunit 10%2C transcript variant X1	NC_036783.1	25362149	25368623	TF314052	EMC10	ER membrane protein complex subunit 10 [Source:HGNC Symbol;Acc:27609]	ER membrane protein complex subunit 10 [Source:ZFIN;Acc:ZDB-GENE-030131-9045]
LOC101475277	LOC101475277	somatostatin receptor type 5%2C transcript variant X2	NC_036783.1	26020052	26058591	TF315737	SSTR3	somatostatin receptor 3 [Source:HGNC Symbol;Acc:11332]	somatostatin receptor 3 [Source:ZFIN;Acc:ZDB-GENE-061009-35]
LOC101475579	LOC101475579	cytohesin-3	NC_036783.1	26106289	26122083	TF352091	CYTH4	cytohesin 4 [Source:HGNC Symbol;Acc:9505]	cytohesin 4 [Source:HGNC Symbol;Acc:9505]
LOC101479631	LOC101479631	splicing factor U2AF 65 kDa subunit	NC_036783.1	26321737	26334685	TF314111	U2AF2	U2 small nuclear RNA auxiliary factor 2 [Source:HGNC Symbol;Acc:23156]	U2 small nuclear RNA auxiliary factor 2a [Source:ZFIN;Acc:ZDB-GENE-050706-131]
LOC101480700	LOC101480700	germ cell-specific gene 1-like protein	NC_036783.1	26347326	26356915	TF331388	GSG1M_HUMAN	Putative germ cell-specific gene 1-like protein 2 [Source:UniProtKB/Swiss-Prot;Acc:A8MUP6]	si:ch211-138k19.2 [Source:ZFIN;Acc:ZDB-GENE-121214-171]
LOC101484147	LOC101484147	protein shisa-6%2C transcript variant X1	NC_036783.1	26690040	26774555	TF330800	SHISA6	shisa homolog 6 (Xenopus laevis) [Source:HGNC Symbol;Acc:34491]	Uncharacterized protein [Source:UniProtKB/TrEMBL;Acc:H9GYN4]
LOC101484603	LOC101484603	phosphoinositide-interacting protein	NC_036783.1	26787653	26812705	TF328608	PIRT	phosphoinositide-interacting regulator of transient receptor potential channels [Source:HGNC Symbol;Acc:37239]	NA
LOC101485190	LOC101485190	uncharacterized LOC101485190%2C transcript variant X1	NC_036783.1	26893068	26895821	NA	NA	NA	NA
LOC105941033	LOC105941033	uncharacterized LOC105941033	NC_036783.1	26964443	27035676	NA	NA	NA	NA
LOC101487767	LOC101487767	RNA binding protein fox-1 homolog 3%2C transcript variant X1	NC_036783.1	27104967	27532265	TF315942	RBFOX3	RNA binding protein, fox-1 homolog (C. elegans) 3 [Source:HGNC Symbol;Acc:27097]	RNA binding protein, fox-1 homolog 3, like [Source:ZFIN;Acc:ZDB-GENE-091204-46]
LOC101464421	LOC101464421	glutamate receptor ionotropic%2C NMDA 2C	NC_036783.1	27554554	27629506	TF314731	GRIN2C	glutamate receptor, ionotropic, N-methyl D-aspartate 2C [Source:HGNC Symbol;Acc:4587]	glutamate receptor, ionotropic, N-methyl D-aspartate 2Ca [Source:ZFIN;Acc:ZDB-GENE-070822-3]
LOC101483695	LOC101483695	myosin-11	NC_036783.1	27855734	27883536	TF333601	MYH11	myosin, heavy chain 11, smooth muscle [Source:HGNC Symbol;Acc:7569]	myosin, heavy polypeptide 11, smooth muscle b [Source:ZFIN;Acc:ZDB-GENE-101124-2]
LOC101466354	LOC101466354	polycomb protein suz12-B%2C transcript variant X2	NC_036783.1	27928674	27945600	TF323249	SUZ12	suppressor of zeste 12 homolog (Drosophila) [Source:HGNC Symbol;Acc:17101]	suppressor of zeste 12 homolog (Drosophila) a [Source:ZFIN;Acc:ZDB-GENE-040801-36]
LOC101471294	LOC101471294	ras-related protein Rab-40C	NC_036783.1	28757883	28779784	TF323230	RAB40C	RAB40C, member RAS oncogene family [Source:HGNC Symbol;Acc:18285]	RAB40c, member RAS oncogene family [Source:ZFIN;Acc:ZDB-GENE-030515-1]
LOC101466550	LOC101466550	GTPase IMAP family member 4	NC_036783.1	29002045	29005589	TF330845	GIMAP4	GTPase, IMAP family member 4 [Source:HGNC Symbol;Acc:21872]	zgc:172090 [Source:ZFIN;Acc:ZDB-GENE-080204-40]
LOC101466260	LOC101466260	GTPase IMAP family member 4	NC_036783.1	29010057	29012712	TF330845	GIMAP4	GTPase, IMAP family member 4 [Source:HGNC Symbol;Acc:21872]	si:ch211-113e8.5 [Source:ZFIN;Acc:ZDB-GENE-090312-189]
LOC101488127	mvp	major vault protein%2C transcript variant X1	NC_036783.1	29236300	29248469	TF329353	MVP	major vault protein [Source:HGNC Symbol;Acc:7531]	major vault protein [Source:ZFIN;Acc:ZDB-GENE-030826-33]
LOC101487665	LOC101487665	proline-rich transmembrane protein 2%2C transcript variant X1	NC_036783.1	29267635	29290957	TF333012	TUSC5	tumor suppressor candidate 5 [Source:HGNC Symbol;Acc:29592]	tumor suppressor candidate 5 [Source:HGNC Symbol;Acc:29592]
LOC101481663	LOC101481663	corticotropin-releasing factor receptor 1	NC_036783.1	29551978	29580834	TF315710	CRHR1	corticotropin releasing hormone receptor 1 [Source:HGNC Symbol;Acc:2357]	corticotropin releasing hormone receptor 1 [Source:ZFIN;Acc:ZDB-GENE-081231-1]
LOC105941026	LOC105941026	integrin alpha-3-like	NC_036783.1	29708072	29711146	TF105391	ITGA3	integrin, alpha 3 (antigen CD49C, alpha 3 subunit of VLA-3 receptor) [Source:HGNC Symbol;Acc:6139]	integrin, alpha 3a [Source:ZFIN;Acc:ZDB-GENE-090805-3]
LOC101468997	LOC101468997	syntaxin-1B	NC_036783.1	29992932	30041831	TF313763	STX1B	syntaxin 1B [Source:HGNC Symbol;Acc:18539]	syntaxin 1B [Source:ZFIN;Acc:ZDB-GENE-000330-4]
LOC101487954	LOC101487954	perforin-1-like	NC_036783.1	30050454	30065544	TF330498	PRF1	perforin 1 (pore forming protein) [Source:HGNC Symbol;Acc:9360]	perforin 1.3 [Source:ZFIN;Acc:ZDB-GENE-060503-461]
LOC101470433	LOC101470433	keratin%2C type I cytoskeletal 13	NC_036783.1	30154813	30158402	TF332742	KRT20	keratin 20 [Source:HGNC Symbol;Acc:20412]	keratin 15 [Source:ZFIN;Acc:ZDB-GENE-040426-2931]
LOC101464240	rapgefl1	Rap guanine nucleotide exchange factor like 1	NC_036783.1	30225248	30243646	TF313184	RAPGEFL1	Rap guanine nucleotide exchange factor (GEF)-like 1 [Source:HGNC Symbol;Acc:17428]	Rap guanine nucleotide exchange factor (GEF)-like 1 [Source:HGNC Symbol;Acc:17428]
LOC101474986	LOC101474986	F-box/LRR-repeat protein 19	NC_036783.1	30369006	30385402	TF338452	FBXL19	F-box and leucine-rich repeat protein 19 [Source:HGNC Symbol;Acc:25300]	F-box and leucine-rich repeat protein 19 [Source:HGNC Symbol;Acc:25300]
LOC101475758	LOC101475758	uncharacterized LOC101475758	NC_036783.1	30399384	30407529	NA	NA	NA	NA
LOC101470735	helz2	helicase with zinc finger 2%2C transcript variant X2	NC_036784.1	146097	170886	TF323999	HELZ2	helicase with zinc finger 2, transcriptional coactivator [Source:HGNC Symbol;Acc:30021]	helicase with zinc finger 2, transcriptional coactivator [Source:HGNC Symbol;Acc:30021]
LOC101483075	fezf2	FEZ family zinc finger 2%2C transcript variant X2	NC_036784.1	319546	324332	TF316780	FEZF2	FEZ family zinc finger 2 [Source:HGNC Symbol;Acc:13506]	FEZ family zinc finger 2 [Source:ZFIN;Acc:ZDB-GENE-001103-3]
LOC101482595	LOC101482595	calcium-dependent secretion activator 1%2C transcript variant X1	NC_036784.1	375886	715617	TF312963	CADPS	Ca++-dependent secretion activator [Source:HGNC Symbol;Acc:1426]	Ca2+-dependent activator protein for secretion a [Source:ZFIN;Acc:ZDB-GENE-030616-525]
LOC106675421	LOC106675421	G2/M phase-specific E3 ubiquitin-protein ligase	NC_036784.1	721736	728136	TF325426	PHF7	PHD finger protein 7 [Source:HGNC Symbol;Acc:18458]	G2/M-phase specific E3 ubiquitin ligase [Source:ZFIN;Acc:ZDB-GENE-030616-400]
LOC112434881	LOC112434881	uncharacterized LOC112434881	NC_036784.1	813339	814178	NA	NA	NA	NA
LOC101475558	LOC101475558	pleckstrin homology domain-containing family A member 6	NC_036784.1	902798	975585	TF329090	PLEKHA6	pleckstrin homology domain containing, family A member 6 [Source:HGNC Symbol;Acc:17053]	pleckstrin homology domain containing, family A member 6 [Source:HGNC Symbol;Acc:17053]
LOC101475259	LOC101475259	C->U-editing enzyme APOBEC-2	NC_036784.1	991848	999932	TF331356	APOBEC2	apolipoprotein B mRNA editing enzyme, catalytic polypeptide-like 2 [Source:HGNC Symbol;Acc:605]	apolipoprotein B mRNA editing enzyme, catalytic polypeptide-like 2a [Source:ZFIN;Acc:ZDB-GENE-050306-15]
LOC101480653	nfasc	neurofascin%2C transcript variant X2	NC_036784.1	1053014	1225986	TF351098	NFASC	neurofascin [Source:HGNC Symbol;Acc:29866]	neurofascin homolog (chicken) a [Source:ZFIN;Acc:ZDB-GENE-080229-6]
LOC101478572	LOC101478572	zinc finger protein 285%2C transcript variant X1	NC_036784.1	1232575	1235405	TF337091	ZFP41_HUMAN	Zinc finger protein 41 homolog [Source:UniProtKB/Swiss-Prot;Acc:Q8N8Y5]	si:ch211-155e24.3 [Source:ZFIN;Acc:ZDB-GENE-070912-116]
LOC101477448	LOC101477448	synaptophysin-like protein 1%2C transcript variant X1	NC_036784.1	1251792	1294161	TF315804	SYPL2	synaptophysin-like 2 [Source:HGNC Symbol;Acc:27638]	synaptophysin-like 2a [Source:ZFIN;Acc:ZDB-GENE-040426-1434]
LOC101474098	fhit	fragile histidine triad	NC_036784.1	1613593	1765287	TF105432	FHIT	fragile histidine triad [Source:HGNC Symbol;Acc:3701]	fragile histidine triad gene [Source:ZFIN;Acc:ZDB-GENE-040426-1703]
LOC101474603	LOC101474603	ubiquitin-conjugating enzyme E2 variant 1%2C transcript variant X2	NC_036784.1	2029118	2035792	TF316971	UBE2V2	ubiquitin-conjugating enzyme E2 variant 2 [Source:HGNC Symbol;Acc:12495]	ubiquitin-conjugating enzyme E2 variant 1 [Source:ZFIN;Acc:ZDB-GENE-051030-102]
LOC101480320	LOC101480320	uncharacterized LOC101480320	NC_036784.1	2616813	2619522	TF337855	FAM217B	family with sequence similarity 217, member B [Source:HGNC Symbol;Acc:16170]	NA
LOC101480896	LOC101480896	endothelin-3	NC_036784.1	2674969	2696498	TF333184	EDN3	endothelin 3 [Source:HGNC Symbol;Acc:3178]	endothelin 1 [Source:ZFIN;Acc:ZDB-GENE-000920-1]
LOC101481858	cstf1	cleavage stimulation factor subunit 1%2C transcript variant X1	NC_036784.1	2728731	2738977	TF314234	CSTF1	cleavage stimulation factor, 3' pre-RNA, subunit 1, 50kDa [Source:HGNC Symbol;Acc:2483]	cleavage stimulation factor, 3' pre-RNA, subunit 1 [Source:ZFIN;Acc:ZDB-GENE-030131-2958]
LOC101484268	ptpdc1	protein tyrosine phosphatase domain containing 1%2C transcript variant X1	NC_036784.1	2922955	2952074	TF313460	PTPDC1	protein tyrosine phosphatase domain containing 1 [Source:HGNC Symbol;Acc:30184]	protein tyrosine phosphatase domain containing 1 [Source:ZFIN;Acc:ZDB-GENE-070112-632]
LOC101484715	LOC101484715	protein Wnt-7a	NC_036784.1	2962231	2978168	TF105310	WNT7A	wingless-type MMTV integration site family, member 7A [Source:HGNC Symbol;Acc:12786]	wingless-type MMTV integration site family, member 7Aa [Source:ZFIN;Acc:ZDB-GENE-051129-1]
LOC101485002	LOC101485002	fibulin-2%2C transcript variant X1	NC_036784.1	3041583	3114613	TF317514	FBLN2	fibulin 2 [Source:HGNC Symbol;Acc:3601]	fibulin 2 [Source:ZFIN;Acc:ZDB-GENE-060711-1]
LOC101485759	LOC101485759	IQ motif and SEC7 domain-containing protein 1%2C transcript variant X7	NC_036784.1	3283966	3525045	TF323811	IQSEC1	IQ motif and Sec7 domain 1 [Source:HGNC Symbol;Acc:29112]	Uncharacterized protein [Source:UniProtKB/TrEMBL;Acc:E7EZE5]
LOC101487577	efcc1	EF-hand and coiled-coil domain containing 1	NC_036784.1	3559536	3581894	TF330736	EFCC1	EF-hand and coiled-coil domain containing 1 [Source:HGNC Symbol;Acc:25692]	Uncharacterized protein [Source:UniProtKB/TrEMBL;Acc:F1QTN1]
LOC101466268	epha8	EPH receptor A8%2C transcript variant X1	NC_036784.1	3777477	3918590	TF314013	EPHA10	EPH receptor A10 [Source:HGNC Symbol;Acc:19987]	Uncharacterized protein [Source:UniProtKB/TrEMBL;Acc:H9GXF0]
LOC112434793	LOC112434793	uncharacterized LOC112434793	NC_036784.1	4092857	4094631	NA	NA	NA	NA
LOC101467113	nucks1	nuclear casein kinase and cyclin dependent kinase substrate 1	NC_036784.1	4117992	4144990	TF335955	RAD51AP1	RAD51 associated protein 1 [Source:HGNC Symbol;Acc:16956]	RAD51 associated protein 1 [Source:ZFIN;Acc:ZDB-GENE-050419-96]
LOC106675000	LOC106675000	uncharacterized LOC106675000	NC_036784.1	4442733	4473382	NA	NA	NA	NA
LOC101472467	snrpe	small nuclear ribonucleoprotein polypeptide E	NC_036784.1	4832860	4836914	TF314419	SNRPE	small nuclear ribonucleoprotein polypeptide E [Source:HGNC Symbol;Acc:11161]	small nuclear ribonucleoprotein polypeptide E [Source:ZFIN;Acc:ZDB-GENE-040426-1112]	None	NANoHomolog
LOC101472760	LOC101472760	cell division control protein 42 homolog	NC_036784.1	4837514	4848576	TF101109	CDC42	cell division cycle 42 [Source:HGNC Symbol;Acc:1736]	cell division cycle 42 [Source:ZFIN;Acc:ZDB-GENE-030131-8783]
LOC101473265	wnt4	Wnt family member 4	NC_036784.1	4859650	4885996	TF105310	WNT4	wingless-type MMTV integration site family, member 4 [Source:HGNC Symbol;Acc:12783]	wingless-type MMTV integration site family, member 4a [Source:ZFIN;Acc:ZDB-GENE-980526-352]
LOC101474879	LOC101474879	thioredoxin reductase 1%2C cytoplasmic	NC_036784.1	5145998	5157055	TF314782	TXNRD3	thioredoxin reductase 3 [Source:HGNC Symbol;Acc:20667]	thioredoxin reductase 1 [Source:ZFIN;Acc:ZDB-GENE-030327-2]
LOC112434864	LOC112434864	lipopolysaccharide-binding protein-like	NC_036784.1	5378643	5380908	TF315617	BPI	bactericidal/permeability-increasing protein [Source:HGNC Symbol;Acc:1095]	si:dkey-11f4.4 [Source:ZFIN;Acc:ZDB-GENE-070912-360]
LOC112434812	LOC112434812	uncharacterized LOC112434812	NC_036784.1	5433728	5437330	TF352522	NA	NA	NA	None	NANoHomolog
LOC101479109	LOC101479109	band 4.1-like protein 1%2C transcript variant X1	NC_036784.1	5488563	5589138	TF351626	EPB41L1	erythrocyte membrane protein band 4.1-like 1 [Source:HGNC Symbol;Acc:3378]	erythrocyte membrane protein band 4.1-like 1 [Source:HGNC Symbol;Acc:3378]
LOC101478829	LOC101478829	contactin-4%2C transcript variant X1	NC_036784.1	5594151	5792593	TF351103	CNTN4	contactin 4 [Source:HGNC Symbol;Acc:2174]	contactin 4 [Source:ZFIN;Acc:ZDB-GENE-060929-776]
LOC101478554	LOC101478554	contactin-4	NC_036784.1	5922372	6050031	TF351103	CNTN4	contactin 4 [Source:HGNC Symbol;Acc:2174]	Uncharacterized protein [Source:UniProtKB/TrEMBL;Acc:F1QA39]
LOC106675611	LOC106675611	uncharacterized LOC106675611	NC_036784.1	6080665	6084765	TF333856	NA	NA	si:ch211-51a19.5 [Source:ZFIN;Acc:ZDB-GENE-041014-366]
LOC112434873	LOC112434873	uncharacterized LOC112434873	NC_036784.1	6128021	6128652	NA	NA	NA	NA
LOC112429686	LOC112429686	neural cell adhesion molecule L1-like protein	NC_036784.1	6137631	6220665	TF351098	CHL1	cell adhesion molecule with homology to L1CAM (close homolog of L1) [Source:HGNC Symbol;Acc:1939]	cell adhesion molecule with homology to L1CAM (close homolog of L1) [Source:HGNC Symbol;Acc:1939]
LOC101477429	LOC101477429	contactin-3	NC_036784.1	6352281	6406729	TF351103	CNTN6	contactin 6 [Source:HGNC Symbol;Acc:2176]	Uncharacterized protein [Source:UniProtKB/TrEMBL;Acc:E7EZG5]
LOC101476090	gxylt2	glucoside xylosyltransferase 2	NC_036784.1	6686902	6704710	TF323210	GXYLT2	glucoside xylosyltransferase 2 [Source:HGNC Symbol;Acc:33383]	glucoside xylosyltransferase 2 [Source:ZFIN;Acc:ZDB-GENE-070424-64]
LOC101476382	shq1	SHQ1%2C H/ACA ribonucleoprotein assembly factor%2C transcript variant X5	NC_036784.1	6702319	6752270	TF106118	SHQ1	SHQ1, H/ACA ribonucleoprotein assembly factor [Source:HGNC Symbol;Acc:25543]	SHQ1 homolog (S. cerevisiae) [Source:ZFIN;Acc:ZDB-GENE-070112-1412]
LOC101475797	rybp	RING1 and YY1 binding protein	NC_036784.1	6780372	6797823	TF350501	RYBP	RING1 and YY1 binding protein [Source:HGNC Symbol;Acc:10480]	RING1 and YY1 binding protein b [Source:ZFIN;Acc:ZDB-GENE-061103-96]
LOC101474818	foxp1	forkhead box P1%2C transcript variant X5	NC_036784.1	6894717	7040306	TF326978	FOXP1	forkhead box P1 [Source:HGNC Symbol;Acc:3823]	forkhead box P1b [Source:ZFIN;Acc:ZDB-GENE-041203-1]
LOC101474366	LOC101474366	uncharacterized LOC101474366%2C transcript variant X1	NC_036784.1	7127935	7139474	TF330943	NA	NA	zgc:113054 [Source:ZFIN;Acc:ZDB-GENE-050320-9]
LOC101473186	mitfa	microphthalmia-associated transcription factor%2C transcript variant X1	NC_036784.1	7200706	7235571	TF317174	MITF	microphthalmia-associated transcription factor [Source:HGNC Symbol;Acc:7105]	microphthalmia-associated transcription factor a [Source:ZFIN;Acc:ZDB-GENE-990910-11]
LOC101470964	lrrn1	leucine rich repeat neuronal 1	NC_036784.1	7405790	7419704	TF334360	LRRN1	leucine rich repeat neuronal 1 [Source:HGNC Symbol;Acc:20980]	leucine rich repeat neuronal 1 [Source:ZFIN;Acc:ZDB-GENE-071126-1]
LOC101470671	LOC101470671	histone-lysine N-methyltransferase SETMAR	NC_036784.1	7432720	7438156	TF316038	NA	NA	SET domain without mariner transposase fusion [Source:ZFIN;Acc:ZDB-GENE-080204-61]
LOC101478192	LOC101478192	extracellular sulfatase Sulf-2%2C transcript variant X1	NC_036784.1	7884943	7918096	TF313545	SULF2	sulfatase 2 [Source:HGNC Symbol;Acc:20392]	sulfatase 2 [Source:ZFIN;Acc:ZDB-GENE-040426-759]
LOC101465732	comt	catechol-O-methyltransferase	NC_036784.1	8282638	8288806	TF329140	COMT	catechol-O-methyltransferase [Source:HGNC Symbol;Acc:2228]	catechol-O-methyltransferase b [Source:ZFIN;Acc:ZDB-GENE-040724-164]
LOC101466878	mst1r	macrophage stimulating 1 receptor%2C transcript variant X1	NC_036784.1	8319111	8349561	TF317402	MST1R	macrophage stimulating 1 receptor (c-met-related tyrosine kinase) [Source:HGNC Symbol;Acc:7381]	macrophage stimulating 1 receptor (c-met-related tyrosine kinase), b [Source:ZFIN;Acc:ZDB-GENE-071218-3]
LOC101467179	camkv	CaM kinase like vesicle associated	NC_036784.1	8430573	8478267	TF314166	CAMKV	CaM kinase-like vesicle-associated [Source:HGNC Symbol;Acc:28788]	CaM kinase-like vesicle-associated b [Source:ZFIN;Acc:ZDB-GENE-040426-1140]
LOC101467463	sema3f	semaphorin 3F%2C transcript variant X1	NC_036784.1	8491696	8550947	TF352628	SEMA3F	sema domain, immunoglobulin domain (Ig), short basic domain, secreted, (semaphorin) 3F [Source:HGNC Symbol;Acc:10728]	semaphorin 3fb [Source:ZFIN;Acc:ZDB-GENE-050513-2]
LOC112434835	LOC112434835	uncharacterized LOC112434835	NC_036784.1	8663033	8664968	NA	NA	NA	NA
LOC112434882	LOC112434882	uncharacterized LOC112434882	NC_036784.1	8889396	8889723	NA	NA	NA	NA
LOC101487525	LOC101487525	GATA-binding factor 2%2C transcript variant X1	NC_036784.1	9010696	9023417	TF315391	GATA2	GATA binding protein 2 [Source:HGNC Symbol;Acc:4171]	GATA-binding protein 2a [Source:ZFIN;Acc:ZDB-GENE-980526-260]
LOC111500513	trnae-cuc	tRNA-Glu	NC_036784.1	9157883	9157954	NA	NA	NA	NA
LOC101483849	LOC101483849	protein FAM19A4	NC_036784.1	9358699	9396372	TF331749	FAM19A4	family with sequence similarity 19 (chemokine (C-C motif)-like), member A4 [Source:HGNC Symbol;Acc:21591]	family with sequence similarity 19 (chemokine (C-C motif)-like), member A4b [Source:ZFIN;Acc:ZDB-GENE-061013-164]
LOC101482978	LOC101482978	protein FAM19A1%2C transcript variant X3	NC_036784.1	9422848	9544696	TF331749	FAM19A1	family with sequence similarity 19 (chemokine (C-C motif)-like), member A1 [Source:HGNC Symbol;Acc:21587]	Uncharacterized protein [Source:UniProtKB/TrEMBL;Acc:E7F1H4]
LOC101482671	suclg2	succinate-CoA ligase GDP-forming beta subunit	NC_036784.1	9630268	9747448	TF300624	SUCLG2	succinate-CoA ligase, GDP-forming, beta subunit [Source:HGNC Symbol;Acc:11450]	succinate-CoA ligase, GDP-forming, beta subunit [Source:ZFIN;Acc:ZDB-GENE-030114-3]
LOC101482389	LOC101482389	monocarboxylate transporter 2%2C transcript variant X1	NC_036784.1	9796880	9809506	TF313792	SLC16A7	solute carrier family 16, member 7 (monocarboxylic acid transporter 2) [Source:HGNC Symbol;Acc:10928]	solute carrier family 16, member 7 (monocarboxylic acid transporter 2) [Source:ZFIN;Acc:ZDB-GENE-051113-248]
LOC101479397	magi1	membrane associated guanylate kinase%2C WW and PDZ domain containing 1%2C transcript variant X1	NC_036784.1	10000718	10137760	TF316816	MAGI1	membrane associated guanylate kinase, WW and PDZ domain containing 1 [Source:HGNC Symbol;Acc:946]	membrane associated guanylate kinase, WW and PDZ domain containing 1b [Source:ZFIN;Acc:ZDB-GENE-030131-5110]
LOC101478928	adamts9	ADAM metallopeptidase with thrombospondin type 1 motif 9	NC_036784.1	10179307	10223660	TF331949	ADAMTS9	ADAM metallopeptidase with thrombospondin type 1 motif, 9 [Source:HGNC Symbol;Acc:13202]	ADAM metallopeptidase with thrombospondin type 1 motif, 9 [Source:ZFIN;Acc:ZDB-GENE-070814-6]
LOC101478456	prickle2	prickle planar cell polarity protein 2%2C transcript variant X2	NC_036784.1	10228857	10317089	TF313265	PRICKLE2	prickle homolog 2 (Drosophila) [Source:HGNC Symbol;Acc:20340]	prickle-like 2 (Drosophila) [Source:ZFIN;Acc:ZDB-GENE-030724-6]
LOC101477714	psmd6	proteasome 26S subunit%2C non-ATPase 6	NC_036784.1	10353191	10356901	TF313819	PSMD6	proteasome (prosome, macropain) 26S subunit, non-ATPase, 6 [Source:HGNC Symbol;Acc:9564]	proteasome (prosome, macropain) 26S subunit, non-ATPase, 6 [Source:ZFIN;Acc:ZDB-GENE-040426-1038]
LOC101474180	tmem128	transmembrane protein 128	NC_036784.1	10538502	10551312	TF328406	TMEM128	transmembrane protein 128 [Source:HGNC Symbol;Acc:28201]	transmembrane protein 128 [Source:HGNC Symbol;Acc:28201]	None	NANoHomolog
LOC101473088	slc2a9	solute carrier family 2 member 9%2C transcript variant X1	NC_036784.1	10652661	10773015	TF313762	SLC2A9	solute carrier family 2 (facilitated glucose transporter), member 9 [Source:HGNC Symbol;Acc:13446]	solute carrier family 2 (facilitated glucose transporter), member 15a [Source:ZFIN;Acc:ZDB-GENE-060531-109]
LOC101471532	gnrh2	gonadotropin releasing hormone 2	NC_036784.1	10834443	10835906	TF353529	GNRH2	gonadotropin-releasing hormone 2 [Source:HGNC Symbol;Acc:4420]	gonadotropin-releasing hormone 2 [Source:ZFIN;Acc:ZDB-GENE-030516-1]	None	NANoHomolog
LOC101479212	LOC101479212	zinc finger matrin-type protein 1	NC_036784.1	10836320	10842372	TF350019	ZNF346	zinc finger protein 346 [Source:HGNC Symbol;Acc:16403]	zinc finger, matrin-type 1 [Source:HGNC Symbol;Acc:29377]
LOC101471246	LOC101471246	uncharacterized LOC101471246	NC_036784.1	10845021	10849613	TF352065	NA	NA	si:dkey-184p9.9 [Source:ZFIN;Acc:ZDB-GENE-091204-31]
LOC101486374	celf4	CUGBP Elav-like family member 4%2C transcript variant X1	NC_036784.1	11115623	11205449	TF314924	CELF4	CUGBP, Elav-like family member 4 [Source:HGNC Symbol;Acc:14015]	CUGBP, Elav-like family member 4 [Source:ZFIN;Acc:ZDB-GENE-040718-300]
LOC101485874	myorg	myogenesis regulating glycosidase (putative)%2C transcript variant X2	NC_036784.1	11542633	11547211	TF324266	KIAA1161	KIAA1161 [Source:HGNC Symbol;Acc:19918]	si:dkey-228b2.5 [Source:ZFIN;Acc:ZDB-GENE-091113-62]
LOC101484202	dnai1	dynein axonemal intermediate chain 1	NC_036784.1	11569548	11585323	TF300553	DNAI1	dynein, axonemal, intermediate chain 1 [Source:HGNC Symbol;Acc:2954]	dynein, axonemal, intermediate chain 1 [Source:HGNC Symbol;Acc:2954]
LOC101483445	LOC101483445	protein unc-119 homolog B	NC_036784.1	11637009	11648433	TF314474	UNC119B	unc-119 homolog B (C. elegans) [Source:HGNC Symbol;Acc:16488]	unc-119 homolog 1 [Source:ZFIN;Acc:ZDB-GENE-030219-130]
LOC101480930	LOC101480930	lysyl oxidase homolog 2A	NC_036784.1	11783261	11808456	TF326061	LOXL2	lysyl oxidase-like 2 [Source:HGNC Symbol;Acc:6666]	lysyl oxidase-like 2 [Source:HGNC Symbol;Acc:6666]
LOC101478092	msx1	msh homeobox 1	NC_036784.1	11940831	11942910	TF350699	MSX1	msh homeobox 1 [Source:HGNC Symbol;Acc:7391]	muscle segment homeobox E [Source:ZFIN;Acc:ZDB-GENE-980526-312]
LOC105940781	LOC105940781	uncharacterized LOC105940781	NC_036784.1	12013738	12017718	NA	NA	NA	NA
LOC101475620	plxna1	plexin A1%2C transcript variant X1	NC_036784.1	12154896	12340369	TF312962	PLXNA1	plexin A1 [Source:HGNC Symbol;Acc:9099]	plexin A1 [Source:ZFIN;Acc:ZDB-GENE-061007-1]
LOC101477813	LOC101477813	MICOS complex subunit mic25a%2C transcript variant X2	NC_036784.1	12401520	12453743	TF333651	NA	NA	coiled-coil-helix-coiled-coil-helix domain containing 6a [Source:ZFIN;Acc:ZDB-GENE-040930-2]
LOC101471735	LOC101471735	disks large-associated protein 4%2C transcript variant X1	NC_036784.1	12494043	12635285	TF321382	DLGAP4	discs, large (Drosophila) homolog-associated protein 4 [Source:HGNC Symbol;Acc:24476]	Uncharacterized protein [Source:UniProtKB/TrEMBL;Acc:E7F7X5]
LOC101467852	LOC101467852	tensin-2%2C transcript variant X1	NC_036784.1	12840795	12872345	TF315996	TENC1	tensin like C1 domain containing phosphatase (tensin 2) [Source:HGNC Symbol;Acc:19737]	tensin like C1 domain containing phosphatase (tensin 2) [Source:HGNC Symbol;Acc:19737]
LOC111500526	trnaq-uug	tRNA-Gln	NC_036784.1	12872564	12872635	NA	NA	NA	NA
LOC101467549	LOC101467549	vitamin D3 receptor B%2C transcript variant X1	NC_036784.1	12877961	12915262	TF316304	VDR	vitamin D (1,25- dihydroxyvitamin D3) receptor [Source:HGNC Symbol;Acc:12679]	vitamin D receptor b [Source:ZFIN;Acc:ZDB-GENE-080403-10]
LOC101467054	LOC101467054	histone deacetylase 7%2C transcript variant X2	NC_036784.1	12938809	12982311	TF106174	HDAC7	histone deacetylase 7 [Source:HGNC Symbol;Acc:14067]	histone deacetylase 7 [Source:HGNC Symbol;Acc:14067]
LOC101487998	LOC101487998	arf-GAP with coiled-coil%2C ANK repeat and PH domain-containing protein 3%2C transcript variant X4	NC_036784.1	13147765	13204555	TF318315	ACAP3	ArfGAP with coiled-coil, ankyrin repeat and PH domains 3 [Source:HGNC Symbol;Acc:16754]	ArfGAP with coiled-coil, ankyrin repeat and PH domains 3b [Source:ZFIN;Acc:ZDB-GENE-070209-274]
LOC101484752	LOC101484752	mitogen-activated protein kinase 14A%2C transcript variant X2	NC_036784.1	13297785	13321821	TF105100	MAPK14	mitogen-activated protein kinase 14 [Source:HGNC Symbol;Acc:6876]	mitogen-activated protein kinase 14b [Source:ZFIN;Acc:ZDB-GENE-021007-1]
LOC101474642	foxp4	forkhead box P4%2C transcript variant X1	NC_036784.1	13698294	13790662	TF326978	FOXP4	forkhead box P4 [Source:HGNC Symbol;Acc:20842]	forkhead box P4 [Source:ZFIN;Acc:ZDB-GENE-101207-1]
LOC101474373	fam72a	family with sequence similarity 72 member A	NC_036784.1	13934051	13938666	TF329231	FAM72A	family with sequence similarity 72, member A [Source:HGNC Symbol;Acc:24044]	family with sequence similarity 72, member B [Source:HGNC Symbol;Acc:24805]
LOC101469800	LOC101469800	leucine-rich repeat neuronal protein 2-like	NC_036784.1	14224107	14233905	TF334360	LRRN2	leucine rich repeat neuronal 2 [Source:HGNC Symbol;Acc:16914]	Uncharacterized protein [Source:UniProtKB/TrEMBL;Acc:E7F0F5]
LOC101473194	LOC101473194	LIM domain and actin-binding protein 1%2C transcript variant X1	NC_036784.1	14380798	14396263	TF350273	LIMA1	LIM domain and actin binding 1 [Source:HGNC Symbol;Acc:24636]	LIM domain and actin binding 1 [Source:HGNC Symbol;Acc:24636]
LOC101467052	LOC101467052	RNA-binding motif%2C single-stranded-interacting protein 2%2C transcript variant X1	NC_036784.1	14525075	14555386	TF314644	RBMS2	RNA binding motif, single stranded interacting protein 2 [Source:HGNC Symbol;Acc:9909]	Uncharacterized protein [Source:UniProtKB/TrEMBL;Acc:E7F112]
LOC101472302	LOC101472302	E3 ubiquitin-protein ligase DTX3L-like	NC_036784.1	14671493	14672715	TF325526	DTX3L	deltex 3-like (Drosophila) [Source:HGNC Symbol;Acc:30323]	deltex 3-like (Drosophila) [Source:HGNC Symbol;Acc:30323]
LOC101463889	LOC101463889	inositol 1%2C4%2C5-trisphosphate receptor type 1%2C transcript variant X1	NC_036784.1	14759514	14834573	TF312815	ITPR1	inositol 1,4,5-trisphosphate receptor, type 1 [Source:HGNC Symbol;Acc:6180]	inositol 1,4,5-triphosphate receptor, type 1a [Source:ZFIN;Acc:ZDB-GENE-070604-3]
LOC101485512	LOC101485512	sodium channel protein type 8 subunit alpha%2C transcript variant X2	NC_036784.1	14910228	14955588	TF339123	NA	NA	Uncharacterized protein [Source:UniProtKB/TrEMBL;Acc:F1R3H4]
LOC101485242	LOC101485242	methyltransferase-like protein 7A	NC_036784.1	14970218	14974052	TF331790	METTL7A	methyltransferase like 7A [Source:HGNC Symbol;Acc:24550]	methyltransferase like 7A [Source:ZFIN;Acc:ZDB-GENE-061027-239]
LOC101484749	LOC101484749	methyltransferase-like protein 7A%2C transcript variant X1	NC_036784.1	14974079	14976035	TF331790	METTL7A	methyltransferase like 7A [Source:HGNC Symbol;Acc:24550]	methyltransferase like 7A [Source:ZFIN;Acc:ZDB-GENE-061027-239]
LOC106675270	LOC106675270	receptor tyrosine-protein kinase erbB-3%2C transcript variant X1	NC_036784.1	15517264	15546739	TF106002	ERBB3	v-erb-b2 erythroblastic leukemia viral oncogene homolog 3 (avian) [Source:HGNC Symbol;Acc:3431]	v-erb-b2 erythroblastic leukemia viral oncogene homolog 3a [Source:ZFIN;Acc:ZDB-GENE-030916-3]
LOC101482872	srgap3	SLIT-ROBO Rho GTPase activating protein 3%2C transcript variant X1	NC_036784.1	16514937	16572363	TF315892	SRGAP3	SLIT-ROBO Rho GTPase activating protein 3 [Source:HGNC Symbol;Acc:19744]	Uncharacterized protein [Source:UniProtKB/TrEMBL;Acc:E7EYC8]
LOC101481223	cse1l	chromosome segregation 1 like	NC_036784.1	16654671	16666637	TF300473	CSE1L	CSE1 chromosome segregation 1-like (yeast) [Source:HGNC Symbol;Acc:2431]	chromosome segregation 1-like (S. cerevisiae) [Source:ZFIN;Acc:ZDB-GENE-990603-1]
LOC101472206	LOC101472206	NUAK family SNF1-like kinase 2	NC_036784.1	16960866	16970279	TF324572	NUAK2	NUAK family, SNF1-like kinase, 2 [Source:HGNC Symbol;Acc:29558]	NUAK family, SNF1-like kinase, 2 [Source:ZFIN;Acc:ZDB-GENE-050208-563]
LOC101469988	nbl1	neuroblastoma 1%2C DAN family BMP antagonist	NC_036784.1	17107826	17113532	TF106445	NBL1	neuroblastoma, suppression of tumorigenicity 1 [Source:HGNC Symbol;Acc:7650]	neuroblastoma, suppression of tumorigenicity 1 [Source:HGNC Symbol;Acc:7650]
LOC101468636	LOC101468636	melanopsin-like	NC_036784.1	17198097	17199148	TF335891	TAS2R7	taste receptor, type 2, member 7 [Source:HGNC Symbol;Acc:14913]	NA
LOC101468353	fndc10	fibronectin type III domain containing 10	NC_036784.1	17203793	17205390	TF332961	C1orf233	chromosome 1 open reading frame 233 [Source:HGNC Symbol;Acc:42951]	NA
LOC101468049	ssu72	SSU72 homolog%2C RNA polymerase II CTD phosphatase	NC_036784.1	17206257	17211094	TF300194	SSU72	SSU72 RNA polymerase II CTD phosphatase homolog (S. cerevisiae) [Source:HGNC Symbol;Acc:25016]	SSU72 RNA polymerase II CTD phosphatase homolog (S. cerevisiae) [Source:ZFIN;Acc:ZDB-GENE-040426-1689]
LOC101485240	LOC101485240	cytokine-inducible SH2-containing protein%2C transcript variant X1	NC_036784.1	17392628	17399163	TF321368	CISH	cytokine inducible SH2-containing protein [Source:HGNC Symbol;Acc:1984]	suppressor of cytokine signaling 8 [Source:ZFIN;Acc:ZDB-GENE-080204-120]
LOC101483443	LOC101483443	uncharacterized LOC101483443%2C transcript variant X1	NC_036784.1	17526080	17531777	NoHit	NA	NA	NA
LOC101467869	LOC101467869	protein bassoon%2C transcript variant X1	NC_036784.1	18126146	18207388	TF326082	BSN	bassoon presynaptic cytomatrix protein [Source:HGNC Symbol;Acc:1117]	bassoon presynaptic cytomatrix protein [Source:HGNC Symbol;Acc:1117]
LOC101481434	poc1a	POC1 centriolar protein A%2C transcript variant X1	NC_036784.1	18638307	18691040	TF324210	POC1A	POC1 centriolar protein homolog A (Chlamydomonas) [Source:HGNC Symbol;Acc:24488]	POC1 centriolar protein homolog B (Chlamydomonas) [Source:ZFIN;Acc:ZDB-GENE-031118-54]
LOC101487453	akr7l	aldo-keto reductase family 7 like	NC_036784.1	19487892	19491466	TF329173	AKR7A2	aldo-keto reductase family 7, member A2 (aflatoxin aldehyde reductase) [Source:HGNC Symbol;Acc:389]	aldo-keto reductase family 7, member A3 (aflatoxin aldehyde reductase) [Source:ZFIN;Acc:ZDB-GENE-040718-62]
LOC101463812	kcnab2	potassium voltage-gated channel subfamily A regulatory beta subunit 2%2C transcript variant X2	NC_036784.1	19558968	19659935	TF324563	KCNAB2	potassium voltage-gated channel, shaker-related subfamily, beta member 2 [Source:HGNC Symbol;Acc:6229]	potassium voltage-gated channel, shaker-related subfamily, beta member 2 [Source:HGNC Symbol;Acc:6229]
LOC101464488	park7	Parkinsonism associated deglycase	NC_036784.1	19660168	19668092	TF300119	PARK7	parkinson protein 7 [Source:HGNC Symbol;Acc:16369]	parkinson disease (autosomal recessive, early onset) 7 [Source:ZFIN;Acc:ZDB-GENE-041010-5]
LOC101464775	pax7	paired box 7%2C transcript variant X1	NC_036784.1	19690323	19734091	TF351610	PAX7	paired box 7 [Source:HGNC Symbol;Acc:8621]	paired box 7 [Source:HGNC Symbol;Acc:8621]
LOC101466517	LOC101466517	parathymosin	NC_036784.1	19869903	19872613	TF350357	PTMA	prothymosin, alpha [Source:HGNC Symbol;Acc:9623]	prothymosin, alpha a [Source:ZFIN;Acc:ZDB-GENE-030131-7647]
LOC101467269	fam213b	family with sequence similarity 213 member B	NC_036784.1	19884127	19892238	TF313804	FAM213B	family with sequence similarity 213, member B [Source:HGNC Symbol;Acc:28390]	family with sequence similarity 213, member B [Source:ZFIN;Acc:ZDB-GENE-040426-2556]
LOC101468071	miip	migration and invasion inhibitory protein	NC_036784.1	19925892	19935742	TF335829	MIIP	migration and invasion inhibitory protein [Source:HGNC Symbol;Acc:25715]	migration and invasion inhibitory protein [Source:HGNC Symbol;Acc:25715]
LOC101468373	LOC101468373	tumor necrosis factor receptor superfamily member 1B	NC_036784.1	19938473	19944537	TF331157	TNFRSF1B	tumor necrosis factor receptor superfamily, member 1B [Source:HGNC Symbol;Acc:11917]	tumor necrosis factor receptor superfamily, member 1B [Source:HGNC Symbol;Acc:11917]
LOC101468662	trim62	tripartite motif containing 62%2C transcript variant X2	NC_036784.1	19952681	19987686	TF342569	TRIM62	tripartite motif containing 62 [Source:HGNC Symbol;Acc:25574]	tripartite motif containing 62 [Source:ZFIN;Acc:ZDB-GENE-070112-502]
LOC101473108	LOC101473108	forkhead box protein J3%2C transcript variant X2	NC_036784.1	20114137	20215554	TF333250	FOXJ3	forkhead box J3 [Source:HGNC Symbol;Acc:29178]	Uncharacterized protein [Source:UniProtKB/TrEMBL;Acc:E7F138]
LOC101473992	LOC101473992	kazrin%2C transcript variant X1	NC_036784.1	20244597	20379062	TF331216	KAZN	kazrin, periplakin interacting protein [Source:HGNC Symbol;Acc:29173]	kazrin, periplakin interacting protein [Source:HGNC Symbol;Acc:29173]
LOC101474561	LOC101474561	ski oncogene	NC_036784.1	20396413	20426624	TF324133	SKI	v-ski sarcoma viral oncogene homolog (avian) [Source:HGNC Symbol;Acc:10896]	nuclear oncoprotein skib [Source:ZFIN;Acc:ZDB-GENE-990715-10]
LOC101481038	cish	cytokine inducible SH2 containing protein%2C transcript variant X1	NC_036784.1	20502854	20505423	TF321368	CISH	cytokine inducible SH2-containing protein [Source:HGNC Symbol;Acc:1984]	cytokine inducible SH2-containing protein [Source:ZFIN;Acc:ZDB-GENE-050907-1]
LOC101480569	hemk1	HemK methyltransferase family member 1%2C transcript variant X2	NC_036784.1	20505332	20530086	TF324423	HEMK1	HemK methyltransferase family member 1 [Source:HGNC Symbol;Acc:24923]	HemK methyltransferase family member 1 [Source:ZFIN;Acc:ZDB-GENE-050208-185]
LOC112434847	LOC112434847	uncharacterized LOC112434847	NC_036784.1	20627207	20628405	NA	NA	NA	NA
LOC112434849	LOC112434849	uncharacterized LOC112434849	NC_036784.1	20629641	20630846	NA	NA	NA	NA
LOC101483348	cacna2d2	calcium voltage-gated channel auxiliary subunit alpha2delta 2%2C transcript variant X1	NC_036784.1	20644072	20829145	TF315824	CACNA2D2	calcium channel, voltage-dependent, alpha 2/delta subunit 2 [Source:HGNC Symbol;Acc:1400]	calcium channel, voltage-dependent, alpha 2/delta subunit 2 [Source:HGNC Symbol;Acc:1400]
LOC101470208	LOC101470208	ubiquitin-like modifier-activating enzyme 1	NC_036784.1	21168897	21201665	TF300586	UBA7	ubiquitin-like modifier activating enzyme 7 [Source:HGNC Symbol;Acc:12471]	Uncharacterized protein [Source:UniProtKB/TrEMBL;Acc:E7EYF3]
LOC101470797	LOC101470797	guanine nucleotide-binding protein G(i) subunit alpha-2	NC_036784.1	21207278	21256866	TF300673	GNAI2	guanine nucleotide binding protein (G protein), alpha inhibiting activity polypeptide 2 [Source:HGNC Symbol;Acc:4385]	guanine nucleotide binding protein (G protein), alpha inhibiting activity polypeptide 2b [Source:ZFIN;Acc:ZDB-GENE-030131-5861]
LOC101471949	LOC101471949	RNA-binding protein 5	NC_036784.1	21292979	21303573	TF315789	RBM5	RNA binding motif protein 5 [Source:HGNC Symbol;Acc:9902]	RNA binding motif protein 6 [Source:HGNC Symbol;Acc:9903]
LOC101472531	LOC101472531	glutathione peroxidase 2	NC_036784.1	21306980	21308722	TF105318	GPX2	glutathione peroxidase 2 (gastrointestinal) [Source:HGNC Symbol;Acc:4554]	glutathione peroxidase 1a [Source:ZFIN;Acc:ZDB-GENE-030410-1]
LOC101476415	LOC101476415	prostacyclin synthase-like	NC_036784.1	21510146	21520938	TF105090	PTGIS	prostaglandin I2 (prostacyclin) synthase [Source:HGNC Symbol;Acc:9603]	prostaglandin I2 (prostacyclin) synthase [Source:ZFIN;Acc:ZDB-GENE-070116-1]
LOC101476705	LOC101476705	potassium voltage-gated channel subfamily B member 1%2C transcript variant X1	NC_036784.1	21521602	21563132	TF313103	KCNB1	potassium voltage-gated channel, Shab-related subfamily, member 1 [Source:HGNC Symbol;Acc:6231]	Uncharacterized protein [Source:UniProtKB/TrEMBL;Acc:F1RE01]
LOC101477929	LOC101477929	calcium/calmodulin-dependent protein kinase type 1	NC_036784.1	21606334	21625857	TF314166	CAMK1	calcium/calmodulin-dependent protein kinase I [Source:HGNC Symbol;Acc:1459]	calcium/calmodulin-dependent protein kinase I [Source:HGNC Symbol;Acc:1459]
LOC101479317	lg5h3orf67	linkage group 5 C3orf67 homolog%2C transcript variant X7	NC_036784.1	21642142	21677641	TF331222	C3orf67	chromosome 3 open reading frame 67 [Source:HGNC Symbol;Acc:24763]	chromosome 3 open reading frame 67 [Source:HGNC Symbol;Acc:24763]
LOC101480658	ptprg	protein tyrosine phosphatase%2C receptor type G%2C transcript variant X1	NC_036784.1	21755505	21873152	TF351978	PTPRG	protein tyrosine phosphatase, receptor type, G [Source:HGNC Symbol;Acc:9671]	carbonic anhydrase XVI b [Source:ZFIN;Acc:ZDB-GENE-080818-1]
LOC101483654	LOC101483654	synaptoporin	NC_036784.1	21957430	21967085	TF315804	SYNPR	synaptoporin [Source:HGNC Symbol;Acc:16507]	synaptoporin [Source:ZFIN;Acc:ZDB-GENE-030616-625]
LOC101467562	ip6k1	inositol hexakisphosphate kinase 1%2C transcript variant X2	NC_036784.1	22269597	22306245	TF314066	IP6K1	inositol hexakisphosphate kinase 1 [Source:HGNC Symbol;Acc:18360]	Uncharacterized protein [Source:UniProtKB/TrEMBL;Acc:F1RE97]
LOC101474102	flnb	filamin B%2C transcript variant X1	NC_036784.1	22638861	22702632	TF313685	FLNB	filamin B, beta [Source:HGNC Symbol;Acc:3755]	filamin A, alpha (actin binding protein 280) [Source:ZFIN;Acc:ZDB-GENE-030131-2145]
LOC101476603	ccdc51	coiled-coil domain containing 51%2C transcript variant X2	NC_036784.1	22757753	22762951	TF318449	CCDC51	coiled-coil domain containing 51 [Source:HGNC Symbol;Acc:25714]	coiled-coil domain containing 51 [Source:ZFIN;Acc:ZDB-GENE-060825-200]
LOC101478388	LOC101478388	MTSS1-like protein%2C transcript variant X1	NC_036784.1	22856509	22936343	TF320619	MTSS1	metastasis suppressor 1 [Source:HGNC Symbol;Acc:20443]	metastasis suppressor 1 [Source:HGNC Symbol;Acc:20443]
LOC101480659	raly	RALY heterogeneous nuclear ribonucleoprotein%2C transcript variant X1	NC_036784.1	23000434	23116782	TF330974	RALY	RNA binding protein, autoantigenic (hnRNP-associated with lethal yellow homolog (mouse)) [Source:HGNC Symbol;Acc:15921]	RNA binding protein, autoantigenic (hnRNP-associated with lethal yellow homolog (mouse)) [Source:ZFIN;Acc:ZDB-GENE-041010-127]
LOC101481141	LOC101481141	agouti-signaling protein	NC_036784.1	23131658	23148552	TF330729	ASIP	agouti signaling protein [Source:HGNC Symbol;Acc:745]	agouti signaling protein [Source:ZFIN;Acc:ZDB-GENE-060215-1]
LOC112434877	LOC112434877	uncharacterized LOC112434877	NC_036784.1	23226948	23229218	NA	NA	NA	NA
LOC101482306	pck1	phosphoenolpyruvate carboxykinase 1	NC_036784.1	23295242	23300604	TF314402	PCK1	phosphoenolpyruvate carboxykinase 1 (soluble) [Source:HGNC Symbol;Acc:8724]	phosphoenolpyruvate carboxykinase 1 (soluble) [Source:ZFIN;Acc:ZDB-GENE-030909-11]
LOC101482596	LOC101482596	protein TMEPAI%2C transcript variant X2	NC_036784.1	23312329	23354310	TF331681	PMEPA1	prostate transmembrane protein, androgen induced 1 [Source:HGNC Symbol;Acc:14107]	prostate transmembrane protein, androgen induced 1 [Source:ZFIN;Acc:ZDB-GENE-040718-320]
LOC101483655	ccndbp1	cyclin D1 binding protein 1	NC_036784.1	23395469	23405155	TF336444	CCNDBP1	cyclin D-type binding-protein 1 [Source:HGNC Symbol;Acc:1587]	cyclin D-type binding-protein 1 [Source:HGNC Symbol;Acc:1587]
LOC101484772	rims4	regulating synaptic membrane exocytosis 4%2C transcript variant X1	NC_036784.1	23573225	23626111	TF321703	RIMS1	regulating synaptic membrane exocytosis 1 [Source:HGNC Symbol;Acc:17282]	regulating synaptic membrane exocytosis 1a [Source:ZFIN;Acc:ZDB-GENE-090312-135]
LOC101485527	LOC101485527	uncharacterized LOC101485527	NC_036784.1	23672481	23674579	NA	NA	NA	NA
LOC101486200	LOC101486200	sodium- and chloride-dependent taurine transporter	NC_036784.1	23774765	23800074	TF343812	SLC6A6	solute carrier family 6 (neurotransmitter transporter, taurine), member 6 [Source:HGNC Symbol;Acc:11052]	solute carrier family 6 (neurotransmitter transporter, taurine), member 6a [Source:ZFIN;Acc:ZDB-GENE-081104-1]
LOC101473109	grip2	glutamate receptor interacting protein 2%2C transcript variant X1	NC_036784.1	23815721	24100253	TF326909	GRIP1	glutamate receptor interacting protein 1 [Source:HGNC Symbol;Acc:18708]	glutamate receptor interacting protein 2b [Source:ZFIN;Acc:ZDB-GENE-070705-172]
LOC101473993	LOC101473993	receptor-type tyrosine-protein phosphatase T%2C transcript variant X1	NC_036784.1	24310011	24641970	TF312900	PTPRT	protein tyrosine phosphatase, receptor type, T [Source:HGNC Symbol;Acc:9682]	protein tyrosine phosphatase, receptor type, t [Source:ZFIN;Acc:ZDB-GENE-101028-4]
LOC101486385	LOC101486385	R-spondin-4	NC_036784.1	24719395	24753557	TF331799	RSPO4	R-spondin 4 [Source:HGNC Symbol;Acc:16175]	R-spondin family, member 4 [Source:ZFIN;Acc:ZDB-GENE-110103-2]
LOC101486676	LOC101486676	chromodomain-helicase-DNA-binding protein 6%2C transcript variant X2	NC_036784.1	24757965	24852525	TF313572	CHD6	chromodomain helicase DNA binding protein 6 [Source:HGNC Symbol;Acc:19057]	Uncharacterized protein [Source:UniProtKB/TrEMBL;Acc:F1QYR7]
LOC101487817	LOC101487817	RIPOR family member 3%2C transcript variant X3	NC_036784.1	24866825	24923915	TF329332	FAM65C	family with sequence similarity 65, member C [Source:HGNC Symbol;Acc:16168]	family with sequence similarity 65, member C [Source:HGNC Symbol;Acc:16168]
LOC101467066	kctd6	potassium channel tetramerization domain containing 6	NC_036784.1	25047053	25080653	TF315332	KCTD6	potassium channel tetramerisation domain containing 6 [Source:HGNC Symbol;Acc:22235]	potassium channel tetramerisation domain containing 6a [Source:ZFIN;Acc:ZDB-GENE-050208-474]
LOC101467356	ccdc71	coiled-coil domain containing 71	NC_036784.1	25100391	25123141	TF336191	CCDC71	coiled-coil domain containing 71 [Source:HGNC Symbol;Acc:25760]	coiled-coil domain containing 71 [Source:HGNC Symbol;Acc:25760]
LOC101472215	ippk	inositol-pentakisphosphate 2-kinase	NC_036784.1	25439845	25463387	TF106142	IPPK	inositol 1,3,4,5,6-pentakisphosphate 2-kinase [Source:HGNC Symbol;Acc:14645]	inositol 1,3,4,5,6-pentakisphosphate 2-kinase [Source:ZFIN;Acc:ZDB-GENE-050327-41]
LOC101470292	ecm2	extracellular matrix protein 2	NC_036784.1	25469083	25497212	TF330031	ECM2	extracellular matrix protein 2, female organ and adipocyte specific [Source:HGNC Symbol;Acc:3154]	extracellular matrix protein 2, female organ and adipocyte specific [Source:ZFIN;Acc:ZDB-GENE-050208-651]
LOC101471345	cenpp	centromere protein P	NC_036784.1	25503896	25581154	TF333784	CENPP	centromere protein P [Source:HGNC Symbol;Acc:32933]	centromere protein P [Source:ZFIN;Acc:ZDB-GENE-040801-74]
LOC101472805	LOC101472805	prosaposin receptor GPR37L1-like	NC_036784.1	25596428	25603556	TF331292	GPR37L1	G protein-coupled receptor 37 like 1 [Source:HGNC Symbol;Acc:14923]	G protein-coupled receptor 37 like 1a [Source:ZFIN;Acc:ZDB-GENE-110411-20]
LOC101473100	LOC101473100	plasma membrane calcium-transporting ATPase 1%2C transcript variant X2	NC_036784.1	25719892	25850437	TF300330	ATP2B4	ATPase, Ca++ transporting, plasma membrane 4 [Source:HGNC Symbol;Acc:817]	ATPase, Ca++ transporting, plasma membrane 4 [Source:ZFIN;Acc:ZDB-GENE-061027-60]
LOC101476018	LOC101476018	CMP-N-acetylneuraminate-beta-galactosamide-alpha-2%2C3-sialyltransferase 2%2C transcript variant X2	NC_036784.1	26017798	26044947	TF354325	ST3GAL2	ST3 beta-galactoside alpha-2,3-sialyltransferase 2 [Source:HGNC Symbol;Acc:10863]	ST3 beta-galactoside alpha-2,3-sialyltransferase 2, like [Source:ZFIN;Acc:ZDB-GENE-050417-286]
LOC101476973	LOC101476973	protein SSUH2 homolog	NC_036784.1	26064044	26081071	TF320855	SSUH2	ssu-2 homolog (C. elegans) [Source:HGNC Symbol;Acc:24809]	zgc:153440 [Source:ZFIN;Acc:ZDB-GENE-060929-994]
LOC101484763	arhgef10l	Rho guanine nucleotide exchange factor 10 like%2C transcript variant X1	NC_036784.1	26431679	26546613	TF331430	ARHGEF10L	Rho guanine nucleotide exchange factor (GEF) 10-like [Source:HGNC Symbol;Acc:25540]	Rho guanine nucleotide exchange factor (GEF) 10-like [Source:HGNC Symbol;Acc:25540]
LOC111501533	trnap-agg	tRNA-Pro	NC_036784.1	26446491	26446562	NA	NA	NA	NA
LOC112434817	LOC112434817		NC_036784.1	26608887	26611011	NA	NA	NA	NA
LOC106675872	LOC106675872	piggyBac transposable element-derived protein 3-like	NC_036784.1	26683546	26685668	TF328011	PGBD2	piggyBac transposable element derived 2 [Source:HGNC Symbol;Acc:19399]	Uncharacterized protein [Source:UniProtKB/TrEMBL;Acc:F1QQD9]
LOC101485421	igsf21	immunoglobin superfamily member 21%2C transcript variant X2	NC_036784.1	26723643	26913385	TF331223	IGSF21	immunoglobin superfamily, member 21 [Source:HGNC Symbol;Acc:28246]	immunoglobin superfamily, member 21a [Source:ZFIN;Acc:ZDB-GENE-050809-118]
LOC101486386	LOC101486386	kelch domain-containing protein 7A	NC_036784.1	26914397	26918910	TF328485	KLHDC7A	kelch domain containing 7A [Source:HGNC Symbol;Acc:26791]	kelch repeat and BTB (POZ) domain containing 11 [Source:HGNC Symbol;Acc:29104]
LOC101486677	aadacl4	arylacetamide deacetylase like 4	NC_036784.1	26922043	26924194	TF314978	AADACL4	arylacetamide deacetylase-like 4 [Source:HGNC Symbol;Acc:32038]	arylacetamide deacetylase-like 4 [Source:ZFIN;Acc:ZDB-GENE-080919-2]
LOC101487242	lrrc38	leucine rich repeat containing 38	NC_036784.1	26960321	26979721	TF334689	LRRC38	leucine rich repeat containing 38 [Source:HGNC Symbol;Acc:27005]	leucine rich repeat containing 38 [Source:HGNC Symbol;Acc:27005]
LOC101487531	LOC101487531	ephrin type-B receptor 2%2C transcript variant X1	NC_036784.1	27008338	27134815	TF314013	EPHA10	EPH receptor A10 [Source:HGNC Symbol;Acc:19987]	Uncharacterized protein [Source:UniProtKB/TrEMBL;Acc:H9GXF0]
LOC101464007	lactbl1	lactamase beta like 1%2C transcript variant X4	NC_036784.1	27163587	27194478	TF315050	LACTBL1	lactamase, beta-like 1 [Source:HGNC Symbol;Acc:35445]	lactamase, beta-like 1b [Source:ZFIN;Acc:ZDB-GENE-061207-53]
LOC101465351	eif4g3	eukaryotic translation initiation factor 4 gamma 3%2C transcript variant X1	NC_036784.1	27336327	27407113	TF101527	EIF4G3	eukaryotic translation initiation factor 4 gamma, 3 [Source:HGNC Symbol;Acc:3298]	eukaryotic translation initiation factor 4 gamma, 3b [Source:ZFIN;Acc:ZDB-GENE-090312-49]
LOC101469457	pfkfb2	6-phosphofructo-2-kinase/fructose-2%2C6-biphosphatase 2%2C transcript variant X2	NC_036784.1	27453329	27464144	TF313541	PFKFB2	6-phosphofructo-2-kinase/fructose-2,6-biphosphatase 2 [Source:HGNC Symbol;Acc:8873]	6-phosphofructo-2-kinase/fructose-2,6-biphosphatase 2 [Source:HGNC Symbol;Acc:8873]
LOC101471453	LOC101471453	vomeronasal type-1 receptor 1-like	NC_036784.1	27476162	27477103	TF335891	TAS2R7	taste receptor, type 2, member 7 [Source:HGNC Symbol;Acc:14913]	NA
LOC101472029	LOC101472029	plexin-A2	NC_036784.1	27515769	27600620	TF312962	PLXNA2	plexin A2 [Source:HGNC Symbol;Acc:9100]	plexin A2 [Source:HGNC Symbol;Acc:9100]
LOC101465445	cd55	CD55 molecule (Cromer blood group)%2C transcript variant X1	NC_036784.1	27652811	27662691	TF334137	CR1L	complement component (3b/4b) receptor 1-like [Source:HGNC Symbol;Acc:2335]	Uncharacterized protein [Source:UniProtKB/TrEMBL;Acc:E7FCC2]
LOC112429755	LOC112429755	uncharacterized LOC112429755	NC_036784.1	27662753	27668846	TF316327	NA	NA	NA
LOC101472626	LOC101472626	membrane-associated guanylate kinase%2C WW and PDZ domain-containing protein 3%2C transcript variant X1	NC_036784.1	27673953	27797450	TF316816	MAGI3	membrane associated guanylate kinase, WW and PDZ domain containing 3 [Source:HGNC Symbol;Acc:29647]	membrane associated guanylate kinase, WW and PDZ domain containing 3 [Source:HGNC Symbol;Acc:29647]
LOC101473598	LOC101473598	rap1 GTPase-activating protein 1%2C transcript variant X1	NC_036784.1	27834120	27947954	TF318626	RAP1GAP	RAP1 GTPase activating protein [Source:HGNC Symbol;Acc:9858]	Uncharacterized protein [Source:UniProtKB/TrEMBL;Acc:F1Q8E0]
LOC101477444	LOC101477444	ankyrin repeat and SAM domain-containing protein 1A%2C transcript variant X6	NC_036784.1	28097625	28157265	TF320582	ANKS1A	ankyrin repeat and sterile alpha motif domain containing 1A [Source:HGNC Symbol;Acc:20961]	ankyrin repeat and sterile alpha motif domain containing 1B [Source:ZFIN;Acc:ZDB-GENE-041210-349]
LOC101481524	LOC101481524	metabotropic glutamate receptor 4%2C transcript variant X1	NC_036784.1	28311914	28522896	TF313240	GRM4	glutamate receptor, metabotropic 4 [Source:HGNC Symbol;Acc:4596]	glutamate receptor, metabotropic 4 [Source:HGNC Symbol;Acc:4596]
LOC101466021	LOC101466021	immunoglobulin-like and fibronectin type III domain-containing protein 1	NC_036784.1	28596561	28610697	TF351819	IGSF22	immunoglobulin superfamily, member 22 [Source:HGNC Symbol;Acc:26750]	immunoglobulin-like and fibronectin type III domain containing 1 [Source:HGNC Symbol;Acc:24607]
LOC101463713	smpd2	sphingomyelin phosphodiesterase 2	NC_036784.1	28801589	28810081	TF313899	SMPD2	sphingomyelin phosphodiesterase 2, neutral membrane (neutral sphingomyelinase) [Source:HGNC Symbol;Acc:11121]	sphingomyelin phosphodiesterase 2, neutral membrane (neutral sphingomyelinase) [Source:HGNC Symbol;Acc:11121]
LOC101464004	LOC101464004	transcriptional enhancer factor TEF-5%2C transcript variant X1	NC_036784.1	28816054	28847501	TF313443	TEAD3	TEA domain family member 3 [Source:HGNC Symbol;Acc:11716]	TEA domain family member 3 [Source:HGNC Symbol;Acc:11716]
LOC101467456	kcna10	potassium voltage-gated channel subfamily A member 10%2C transcript variant X1	NC_036784.1	28909466	28911157	TF313103	KCNA10	potassium voltage-gated channel, shaker-related subfamily, member 10 [Source:HGNC Symbol;Acc:6219]	potassium voltage-gated channel, shaker-related subfamily, member 10 [Source:HGNC Symbol;Acc:6219]
LOC101467763	LOC101467763	potassium voltage-gated channel subfamily A member 2%2C transcript variant X1	NC_036784.1	28931471	28938613	TF313103	KCNA2	potassium voltage-gated channel, shaker-related subfamily, member 2 [Source:HGNC Symbol;Acc:6220]	Uncharacterized protein [Source:UniProtKB/TrEMBL;Acc:E7F8M2]
LOC101468283	LOC101468283	potassium voltage-gated channel subfamily A member 3-like	NC_036784.1	28949437	28952305	TF313103	KCNA3	potassium voltage-gated channel, shaker-related subfamily, member 3 [Source:HGNC Symbol;Acc:6221]	potassium voltage-gated channel, shaker-related subfamily, member 3 [Source:HGNC Symbol;Acc:6221]
LOC101468558	LOC101468558	nerve growth factor%2C transcript variant X1	NC_036784.1	28983243	29013334	TF106463	NGF	nerve growth factor (beta polypeptide) [Source:HGNC Symbol;Acc:7808]	nerve growth factor (beta polypeptide) [Source:ZFIN;Acc:ZDB-GENE-000629-2]
LOC101470002	LOC101470002	sodium-coupled monocarboxylate transporter 1	NC_036784.1	29045224	29051904	TF316728	SLC5A8	solute carrier family 5 (iodide transporter), member 8 [Source:HGNC Symbol;Acc:19119]	solute carrier family 5 (iodide transporter), member 8-like [Source:ZFIN;Acc:ZDB-GENE-061110-98]
LOC101471059	LOC101471059	monocarboxylate transporter 1	NC_036784.1	29062794	29071727	TF313792	SLC16A1	solute carrier family 16, member 1 (monocarboxylic acid transporter 1) [Source:HGNC Symbol;Acc:10922]	solute carrier family 16, member 1 (monocarboxylic acid transporter 1) [Source:HGNC Symbol;Acc:10922]
LOC112434878	LOC112434878	uncharacterized LOC112434878	NC_036784.1	29184340	29185334	NA	NA	NA	NA
LOC101471348	LOC101471348	protein FAM19A2	NC_036784.1	29214203	29328256	TF331749	FAM19A1	family with sequence similarity 19 (chemokine (C-C motif)-like), member A1 [Source:HGNC Symbol;Acc:21587]	si:dkey-238f9.1 [Source:ZFIN;Acc:ZDB-GENE-091204-297]
LOC101473208	LOC101473208	solute carrier family 12 member 5%2C transcript variant X2	NC_036784.1	29430975	29641597	TF313657	SLC12A5	solute carrier family 12 (potassium/chloride transporter), member 5 [Source:HGNC Symbol;Acc:13818]	solute carrier family 12 (potassium/chloride transporter), member 5a [Source:ZFIN;Acc:ZDB-GENE-120927-3]
LOC101475325	LOC101475325	1%2C25-dihydroxyvitamin D(3) 24-hydroxylase%2C mitochondrial	NC_036784.1	29718584	29725342	TF105094	CYP24A1	cytochrome P450, family 24, subfamily A, polypeptide 1 [Source:HGNC Symbol;Acc:2602]	cytochrome P450, family 24, subfamily A, polypeptide 1 [Source:ZFIN;Acc:ZDB-GENE-060825-1]
LOC101477069	apcdd1l	APC down-regulated 1 like	NC_036784.1	29813777	29830148	TF329491	APCDD1L	adenomatosis polyposis coli down-regulated 1-like [Source:HGNC Symbol;Acc:26892]	Uncharacterized protein [Source:UniProtKB/TrEMBL;Acc:E7F3Y0]
LOC101479522	asic1	acid sensing ion channel subunit 1%2C transcript variant X3	NC_036784.1	29967228	30148945	TF330663	ASIC1	acid-sensing (proton-gated) ion channel 1 [Source:HGNC Symbol;Acc:100]	acid-sensing (proton-gated) ion channel 1a [Source:ZFIN;Acc:ZDB-GENE-040513-2]
LOC101483936	tfap2c	transcription factor AP-2 gamma%2C transcript variant X1	NC_036784.1	30357862	30370582	TF313718	TFAP2C	transcription factor AP-2 gamma (activating enhancer binding protein 2 gamma) [Source:HGNC Symbol;Acc:11744]	transcription factor AP-2 gamma (activating enhancer binding protein 2 gamma) [Source:ZFIN;Acc:ZDB-GENE-041212-61]
LOC112434853	LOC112434853	uncharacterized LOC112434853	NC_036784.1	30517986	30520530	TF353362	NA	NA	Uncharacterized protein [Source:UniProtKB/TrEMBL;Acc:F1QEY3]
LOC101484764	cdh22	cadherin 22	NC_036784.1	30668260	30856329	TF329887	CDH22	cadherin 22, type 2 [Source:HGNC Symbol;Acc:13251]	Uncharacterized protein [Source:UniProtKB/TrEMBL;Acc:E7F061]
LOC112434869	LOC112434869	uncharacterized LOC112434869	NC_036784.1	30888951	30890442	NA	NA	NA	NA
LOC112434870	LOC112434870	uncharacterized LOC112434870	NC_036784.1	30890450	30891445	NA	NA	NA	NA
LOC101486194	cbfa2t2	CBFA2/RUNX1 translocation partner 2%2C transcript variant X2	NC_036784.1	31039994	31076618	TF106303	CBFA2T2	core-binding factor, runt domain, alpha subunit 2; translocated to, 2 [Source:HGNC Symbol;Acc:1536]	core-binding factor, runt domain, alpha subunit 2; translocated to, 2 [Source:ZFIN;Acc:ZDB-GENE-070209-1]
LOC101487444	snta1	syntrophin alpha 1	NC_036784.1	31085947	31117388	TF317932	SNTA1	syntrophin, alpha 1 [Source:HGNC Symbol;Acc:11167]	syntrophin, alpha 1 [Source:HGNC Symbol;Acc:11167]
LOC101487730	LOC101487730	thymocyte selection-associated high mobility group box protein TOX%2C transcript variant X1	NC_036784.1	31129990	31235221	TF106481	TOX2	TOX high mobility group box family member 2 [Source:HGNC Symbol;Acc:16095]	Uncharacterized protein [Source:UniProtKB/TrEMBL;Acc:E7F0N2]
LOC101464867	LOC101464867	potassium voltage-gated channel subfamily D member 3%2C transcript variant X1	NC_036784.1	31331517	31430416	TF313103	KCND3	potassium voltage-gated channel, Shal-related subfamily, member 3 [Source:HGNC Symbol;Acc:6239]	potassium voltage-gated channel, Shal-related subfamily, member 3 [Source:ZFIN;Acc:ZDB-GENE-030131-5626]
LOC101467458	arhgap40	Rho GTPase activating protein 40	NC_036784.1	31654783	31679849	TF314044	ARHGAP40	Rho GTPase activating protein 40 [Source:HGNC Symbol;Acc:16226]	Rho GTPase activating protein 40 [Source:HGNC Symbol;Acc:16226]
LOC101470793	LOC101470793	neurexophilin-4%2C transcript variant X1	NC_036784.1	31906163	31954397	TF333047	NXPH4	neurexophilin 4 [Source:HGNC Symbol;Acc:8078]	neurexophilin 4 [Source:HGNC Symbol;Acc:8078]
LOC101481525	LOC101481525	collagen alpha-1(II) chain%2C transcript variant X1	NC_036784.1	32150917	32199227	TF323987	COL11A1	collagen, type XI, alpha 1 [Source:HGNC Symbol;Acc:2186]	collagen, type I, alpha 1a [Source:ZFIN;Acc:ZDB-GENE-030131-9102]
LOC101482005	LOC101482005	leucine-rich repeat-containing protein 3	NC_036784.1	32199635	32205376	TF327070	LRRC3B	leucine rich repeat containing 3B [Source:HGNC Symbol;Acc:28105]	leucine rich repeat containing 3 [Source:ZFIN;Acc:ZDB-GENE-080327-13]
LOC101481242	lg5h12orf10	linkage group 5 C12orf10 homolog	NC_036784.1	32208605	32230424	TF313313	C12orf10	chromosome 12 open reading frame 10 [Source:HGNC Symbol;Acc:17590]	chromosome 12 open reading frame 10 [Source:HGNC Symbol;Acc:17590]
LOC101474744	LOC101474744	kinesin heavy chain%2C transcript variant X1	NC_036784.1	32390472	32464178	TF105225	KIF5A	kinesin family member 5A [Source:HGNC Symbol;Acc:6323]	kinesin family member 5A [Source:HGNC Symbol;Acc:6323]
LOC101473986	ddit3	DNA damage inducible transcript 3%2C transcript variant X1	NC_036784.1	32489948	32493946	TF105006	DDIT3	DNA-damage-inducible transcript 3 [Source:HGNC Symbol;Acc:2726]	DNA-damage-inducible transcript 3 [Source:ZFIN;Acc:ZDB-GENE-070410-90]
LOC101487185	LOC101487185	keratin%2C type II cytoskeletal 8-like	NC_036784.1	32948127	32971867	TF317854	KRT1	keratin 1 [Source:HGNC Symbol;Acc:6412]	si:dkey-222f2.1 [Source:ZFIN;Acc:ZDB-GENE-050208-726]
LOC101472666	LOC101472666	granzyme B-like	NC_036784.1	33020839	33022458	TF333630	GZMA	granzyme A (granzyme 1, cytotoxic T-lymphocyte-associated serine esterase 3) [Source:HGNC Symbol;Acc:4708]	Uncharacterized protein [Source:UniProtKB/TrEMBL;Acc:E7F3X2]
LOC101484152	LOC101484152	CMRF35-like molecule 8	NC_036784.1	33113841	33116502	TF334441	ADORA3	adenosine A3 receptor [Source:HGNC Symbol;Acc:268]	Uncharacterized protein [Source:UniProtKB/TrEMBL;Acc:F1QLB3]
LOC101471203	LOC101471203	uncharacterized LOC101471203	NC_036784.1	33200828	33206154	TF334441	CD300LF	CD300 molecule-like family member f [Source:HGNC Symbol;Acc:29883]	polymeric immunoglobulin receptor [Source:ZFIN;Acc:ZDB-GENE-060503-327]
LOC112434871	LOC112434871	potassium voltage-gated channel subfamily S member 2-like	NC_036784.1	33381629	33405900	TF313103	KCNS1	potassium voltage-gated channel, delayed-rectifier, subfamily S, member 1 [Source:HGNC Symbol;Acc:6300]	potassium voltage-gated channel, delayed-rectifier, subfamily S, member 1 [Source:HGNC Symbol;Acc:6300]
LOC112429983	LOC112429983	olfactory receptor 4D9-like	NC_036784.1	33408766	33410249	TF332078	NA	NA	odorant receptor, family H, subfamily 136, member 2, pseudogene [Source:ZFIN;Acc:ZDB-GENEP-070804-6]
LOC112434856	LOC112434856	growth hormone secretagogue receptor type 1-like	NC_036784.1	33439991	33441058	TF332078	NA	NA	odorant receptor, family H, subfamily 134, member 1 [Source:ZFIN;Acc:ZDB-GENE-070806-22]
LOC106675794	LOC106675794	olfactory receptor 52R1-like	NC_036784.1	33448108	33451482	TF332078	NA	NA	odorant receptor, family H, subfamily 134, member 1 [Source:ZFIN;Acc:ZDB-GENE-070806-22]
LOC112434858	LOC112434858	olfactory receptor 52R1-like	NC_036784.1	33469738	33470901	TF332078	NA	NA	odorant receptor, family H, subfamily 134, member 1 [Source:ZFIN;Acc:ZDB-GENE-070806-22]
LOC112434859	LOC112434859	olfactory receptor 52E8-like	NC_036784.1	33477911	33479296	TF332078	NA	NA	odorant receptor, family H, subfamily 134, member 1 [Source:ZFIN;Acc:ZDB-GENE-070806-22]
LOC112434860	LOC112434860	olfactory receptor 2AG1-like	NC_036784.1	33481131	33484132	TF332078	NA	NA	odorant receptor, family H, subfamily 134, member 1 [Source:ZFIN;Acc:ZDB-GENE-070806-22]
LOC101481469	LOC101481469	uncharacterized LOC101481469	NC_036784.1	33608621	33614373	NA	NA	NA	NA
LOC101468018	dag1	dystroglycan 1%2C transcript variant X2	NC_036784.1	33916796	33973294	TF328370	DAG1	dystroglycan 1 (dystrophin-associated glycoprotein 1) [Source:HGNC Symbol;Acc:2666]	dystroglycan 1 [Source:ZFIN;Acc:ZDB-GENE-021223-1]
LOC101466265	nicn1	nicolin 1%2C transcript variant X1	NC_036784.1	34369205	34379167	TF329753	NICN1	nicolin 1 [Source:HGNC Symbol;Acc:18317]	nicolin 1 [Source:ZFIN;Acc:ZDB-GENE-040801-129]
LOC111500469	LOC111500469		NC_036784.1	34543363	34543477	NA	NA	NA	NA
LOC101465981	LOC101465981	nuclear factor 7%2C brain-like	NC_036784.1	34642256	34643870	TF334286	TRIM35	tripartite motif containing 35 [Source:HGNC Symbol;Acc:16285]	tripartite motif containing 35-29 [Source:ZFIN;Acc:ZDB-GENE-041114-35]
LOC101467503	LOC101467503	metabotropic glutamate receptor 7%2C transcript variant X2	NC_036784.1	34675168	34836681	TF313240	GRM7	glutamate receptor, metabotropic 7 [Source:HGNC Symbol;Acc:4599]	glutamate receptor, metabotropic 6 [Source:HGNC Symbol;Acc:4598]
LOC101465391	rnf123	ring finger protein 123%2C transcript variant X1	NC_036784.1	34893168	35004251	TF313546	RNF123	ring finger protein 123 [Source:HGNC Symbol;Acc:21148]	ring finger protein 123 [Source:ZFIN;Acc:ZDB-GENE-050208-529]
LOC101482627	kcnq2	potassium voltage-gated channel subfamily Q member 2%2C transcript variant X1	NC_036784.1	35059764	35089134	TF315186	KCNQ2	potassium voltage-gated channel, KQT-like subfamily, member 2 [Source:HGNC Symbol;Acc:6296]	potassium voltage-gated channel, KQT-like subfamily, member 2a [Source:ZFIN;Acc:ZDB-GENE-080220-37]
LOC112429775	LOC112429775	uncharacterized LOC112429775	NC_036784.1	35097605	35098865	TF343022	NA	NA	NA
LOC101482340	ddx27	DEAD-box helicase 27%2C transcript variant X1	NC_036784.1	35117209	35127472	TF314780	DDX27	DEAD (Asp-Glu-Ala-Asp) box polypeptide 27 [Source:HGNC Symbol;Acc:15837]	DEAD (Asp-Glu-Ala-Asp) box polypeptide 27 [Source:ZFIN;Acc:ZDB-GENE-031001-8]
LOC101481468	pltp	phospholipid transfer protein%2C transcript variant X2	NC_036784.1	35131780	35166595	TF315617	PLTP	phospholipid transfer protein [Source:HGNC Symbol;Acc:9093]	phospholipid transfer protein [Source:ZFIN;Acc:ZDB-GENE-040801-22]
LOC101480218	LOC101480218	ketohexokinase%2C transcript variant X1	NC_036784.1	35168038	35177215	TF323942	KHK	ketohexokinase (fructokinase) [Source:HGNC Symbol;Acc:6315]	ketohexokinase [Source:ZFIN;Acc:ZDB-GENE-040718-381]
LOC111500723	LOC111500723	uncharacterized LOC111500723	NC_036784.1	35182941	35184700	NA	NA	NA	NA
LOC101468716	LOC101468716	poly(rC)-binding protein 4%2C transcript variant X1	NC_036784.1	35211660	35300827	TF318292	PCBP4	poly(rC) binding protein 4 [Source:HGNC Symbol;Acc:8652]	poly(rC) binding protein 4 [Source:HGNC Symbol;Acc:8652]
LOC101470733	LOC101470733	uncharacterized LOC101470733	NC_036784.1	35366060	35368777	NA	NA	NA	NA
LOC101471403	gdf5	growth differentiation factor 5	NC_036784.1	35428748	35438611	TF316134	GDF5	growth differentiation factor 5 [Source:HGNC Symbol;Acc:4220]	growth differentiation factor 5 [Source:ZFIN;Acc:ZDB-GENE-990415-39]
LOC101471699	LOC101471699	ubiquinol-cytochrome-c reductase complex assembly factor 1	NC_036784.1	35507962	35525146	TF313220	UQCC	ubiquinol-cytochrome c reductase complex chaperone [Source:HGNC Symbol;Acc:15891]	ubiquinol-cytochrome c reductase complex chaperone [Source:ZFIN;Acc:ZDB-GENE-060929-1034]
LOC101472066	fam83c	family with sequence similarity 83 member C	NC_036784.1	35549711	35565594	TF330777	FAM83C	family with sequence similarity 83, member C [Source:HGNC Symbol;Acc:16121]	Uncharacterized protein [Source:UniProtKB/TrEMBL;Acc:E7EXI7]
LOC112434863	LOC112434863	echinoderm microtubule-associated protein-like 6	NC_036784.1	35569932	35591346	TF317832	EML6	echinoderm microtubule associated protein like 6 [Source:HGNC Symbol;Acc:35412]	echinoderm microtubule associated protein like 6 [Source:HGNC Symbol;Acc:35412]
LOC101472361	mmp24	matrix metallopeptidase 24%2C transcript variant X1	NC_036784.1	35620272	35705767	TF352396	MMP24	matrix metallopeptidase 24 (membrane-inserted) [Source:HGNC Symbol;Acc:7172]	matrix metallopeptidase 24 [Source:ZFIN;Acc:ZDB-GENE-040724-262]
LOC101472852	LOC101472852	uncharacterized LOC101472852	NC_036784.1	35717799	35722793	NA	NA	NA	NA
LOC101476746	LOC101476746	DDB1- and CUL4-associated factor 1%2C transcript variant X1	NC_036784.1	35893896	35914333	TF314434	VPRBP	Vpr (HIV-1) binding protein [Source:HGNC Symbol;Acc:30911]	NA
LOC101480263	LOC101480263	protein disulfide-isomerase-like	NC_036785.1	330686	337739	TF106381	PDILT	protein disulfide isomerase-like, testis expressed [Source:HGNC Symbol;Acc:27338]	protein disulfide isomerase-like, testis expressed [Source:HGNC Symbol;Acc:27338]
LOC111501060	trnap-cgg	tRNA-Pro	NC_036785.1	582547	582618	NA	NA	NA	NA
LOC101473086	gna12	G protein subunit alpha 12	NC_036785.1	698972	726704	TF300673	GNA12	guanine nucleotide binding protein (G protein) alpha 12 [Source:HGNC Symbol;Acc:4380]	guanine nucleotide binding protein (G protein) alpha 12a [Source:ZFIN;Acc:ZDB-GENE-050221-1]
LOC101472399	sdk1	sidekick cell adhesion molecule 1%2C transcript variant X1	NC_036785.1	828341	1124987	TF351098	NRCAM	neuronal cell adhesion molecule [Source:HGNC Symbol;Acc:7994]	neuronal cell adhesion molecule [Source:ZFIN;Acc:ZDB-GENE-041210-235]
LOC101468048	LOC101468048	ATP-binding cassette sub-family G member 2	NC_036785.1	1264718	1274854	TF105211	ABCG2	ATP-binding cassette, sub-family G (WHITE), member 2 [Source:HGNC Symbol;Acc:74]	ATP-binding cassette, sub-family G (WHITE), member 2b [Source:ZFIN;Acc:ZDB-GENE-050517-36]
LOC101467750	LOC101467750	UPF0472 protein C16orf72 homolog	NC_036785.1	1275471	1281164	TF323292	C16orf72	chromosome 16 open reading frame 72 [Source:HGNC Symbol;Acc:30103]	chromosome 16 open reading frame 72 [Source:HGNC Symbol;Acc:30103]
LOC101467440	LOC101467440	glutamate receptor ionotropic%2C NMDA 2A	NC_036785.1	1317804	1440673	TF314731	GRIN2A	glutamate receptor, ionotropic, N-methyl D-aspartate 2A [Source:HGNC Symbol;Acc:4585]	glutamate receptor, ionotropic, N-methyl D-aspartate 2A, b [Source:ZFIN;Acc:ZDB-GENE-070424-223]
LOC101486664	LOC101486664	unconventional myosin-XV	NC_036785.1	1468761	1516671	TF316834	MYO15A	myosin XVA [Source:HGNC Symbol;Acc:7594]	myosin XVAb [Source:ZFIN;Acc:ZDB-GENE-090312-149]
LOC101465185	LOC101465185	perforin-1-like	NC_036785.1	1793609	1806240	TF330498	PRF1	perforin 1 (pore forming protein) [Source:HGNC Symbol;Acc:9360]	perforin 1.5 [Source:ZFIN;Acc:ZDB-GENE-081105-3]
LOC101465338	LOC101465338	noelin-2%2C transcript variant X1	NC_036785.1	1943551	1990048	TF315964	OLFM2	olfactomedin 2 [Source:HGNC Symbol;Acc:17189]	olfactomedin 2b [Source:ZFIN;Acc:ZDB-GENE-040426-2402]
LOC101466016	LOC101466016	collagen alpha-1(XI) chain	NC_036785.1	1994664	2041514	TF323987	COL5A3	collagen, type V, alpha 3 [Source:HGNC Symbol;Acc:14864]	collagen, type V, alpha 3b [Source:ZFIN;Acc:ZDB-GENE-110728-4]
LOC101469344	LOC101469344	beta-1%2C3-N-acetylglucosaminyltransferase lunatic fringe	NC_036785.1	2135423	2144993	TF324207	LFNG	LFNG O-fucosylpeptide 3-beta-N-acetylglucosaminyltransferase [Source:HGNC Symbol;Acc:6560]	lunatic fringe homolog [Source:ZFIN;Acc:ZDB-GENE-980605-16]
LOC101469992	LOC101469992	neuropeptide FF receptor 2%2C transcript variant X1	NC_036785.1	2190893	2200020	TF315303	CCKAR	cholecystokinin A receptor [Source:HGNC Symbol;Acc:1570]	Uncharacterized protein [Source:UniProtKB/TrEMBL;Acc:F1QKU3]
LOC106675388	LOC106675388	uncharacterized LOC106675388%2C transcript variant X1	NC_036785.1	2278334	2281760	NA	NA	NA	NA
LOC101470681	mad1l1	mitotic arrest deficient 1 like 1	NC_036785.1	2303471	2365530	TF101083	MAD1L1	MAD1 mitotic arrest deficient-like 1 (yeast) [Source:HGNC Symbol;Acc:6762]	MAD1 mitotic arrest deficient-like 1 [Source:ZFIN;Acc:ZDB-GENE-040426-1081]
LOC101471157	LOC101471157	protein ELFN1%2C transcript variant X2	NC_036785.1	2391239	2520443	TF332887	ELFN1	extracellular leucine-rich repeat and fibronectin type III domain containing 1 [Source:HGNC Symbol;Acc:33154]	extracellular leucine-rich repeat and fibronectin type III domain containing 1b [Source:ZFIN;Acc:ZDB-GENE-080327-21]
LOC101471931	rexo5	RNA exonuclease 5	NC_036785.1	2608480	2618405	TF314974	REXON_HUMAN	Putative RNA exonuclease NEF-sp [Source:UniProtKB/Swiss-Prot;Acc:Q96IC2]	NA
LOC101480165	LOC101480165	homeobox protein unc-4 homolog	NC_036785.1	3119386	3124552	TF315554	UNCX	UNC homeobox [Source:HGNC Symbol;Acc:33194]	Uncharacterized protein [Source:UniProtKB/TrEMBL;Acc:E7EYX9]
LOC101483850	LOC101483850	bromodomain-containing protein 4%2C transcript variant X1	NC_036785.1	3257270	3277707	TF317345	BRD4	bromodomain containing 4 [Source:HGNC Symbol;Acc:13575]	bromodomain containing 4 [Source:ZFIN;Acc:ZDB-GENE-030131-267]
LOC101485333	LOC101485333	beta-1%2C3-galactosyltransferase 1	NC_036785.1	3354199	3360845	TF318639	B3GALT5	UDP-Gal:betaGlcNAc beta 1,3-galactosyltransferase, polypeptide 5 [Source:HGNC Symbol;Acc:920]	beta-1,3-galactosyltransferase 2-like [Source:RefSeq peptide;Acc:NP_001122271]
LOC106675909	LOC106675909	uncharacterized LOC106675909	NC_036785.1	3388203	3397983	NA	NA	NA	NA
LOC101486086	LOC101486086	vasorin%2C transcript variant X2	NC_036785.1	3402909	3447462	TF351825	VASN	vasorin [Source:HGNC Symbol;Acc:18517]	vasorin a [Source:ZFIN;Acc:ZDB-GENE-050522-43]
LOC112434919	LOC112434919		NC_036785.1	3482967	3484664	NA	NA	NA	NA
LOC105941430	LOC105941430	transcription initiation factor TFIID subunit 11-like	NC_036785.1	3606373	3677767	TF313555	CACNA1G	calcium channel, voltage-dependent, T type, alpha 1G subunit [Source:HGNC Symbol;Acc:1394]	calcium channel, voltage-dependent, T type, alpha 1G subunit [Source:ZFIN;Acc:ZDB-GENE-090514-2]
LOC101486864	LOC101486864	arf-GAP with dual PH domain-containing protein 1	NC_036785.1	3933852	3956909	TF324540	ADAP1	ArfGAP with dual PH domains 1 [Source:HGNC Symbol;Acc:16486]	zgc:92360 [Source:ZFIN;Acc:ZDB-GENE-040718-470]
LOC101485704	LOC101485704	GTP-binding protein 1%2C transcript variant X3	NC_036785.1	3985986	4003792	TF350446	GTPBP1	GTP binding protein 1 [Source:HGNC Symbol;Acc:4669]	GTP binding protein 1, like [Source:ZFIN;Acc:ZDB-GENE-041007-2]
LOC101463716	LOC101463716	protein phosphatase 1 regulatory subunit 29-like	NC_036785.1	4222820	4227699	TF332887	ELFN2	extracellular leucine-rich repeat and fibronectin type III domain containing 2 [Source:HGNC Symbol;Acc:29396]	extracellular leucine-rich repeat and fibronectin type III domain containing 2 [Source:ZFIN;Acc:ZDB-GENE-080327-26]
LOC101485425	LOC101485425	beta-1%2C3-N-acetylglucosaminyltransferase manic fringe	NC_036785.1	4610751	4637515	TF324207	MFNG	MFNG O-fucosylpeptide 3-beta-N-acetylglucosaminyltransferase [Source:HGNC Symbol;Acc:7038]	manic fringe homolog [Source:ZFIN;Acc:ZDB-GENE-041130-1]
LOC101486982	LOC101486982	complement C3-like	NC_036785.1	4783702	4814335	TF313285	C3	complement component 3 [Source:HGNC Symbol;Acc:1318]	si:ch211-140f21.1 [Source:ZFIN;Acc:ZDB-GENE-030131-3063]
LOC101483869	ccdc130	coiled-coil domain containing 130	NC_036785.1	4816853	4822593	TF313671	CCDC130	coiled-coil domain containing 130 [Source:HGNC Symbol;Acc:28118]	coiled-coil domain containing 130 [Source:ZFIN;Acc:ZDB-GENE-040912-36]	None	NANoHomolog
LOC101484586	wdr83os	WD repeat domain 83 opposite strand	NC_036785.1	4840941	4844889	TF315003	WDR83OS	WD repeat domain 83 opposite strand [Source:HGNC Symbol;Acc:30203]	WD repeat domain 83 opposite strand [Source:HGNC Symbol;Acc:30203]
LOC101484868	cacna1a	calcium voltage-gated channel subunit alpha1 A%2C transcript variant X3	NC_036785.1	4897699	5058463	TF312805	CACNA1A	calcium channel, voltage-dependent, P/Q type, alpha 1A subunit [Source:HGNC Symbol;Acc:1388]	calcium channel, voltage-dependent, P/Q type, alpha 1A subunit, b [Source:ZFIN;Acc:ZDB-GENE-090514-3]
LOC101485174	ier2	immediate early response 2	NC_036785.1	5075057	5076598	TF331376	IER2	immediate early response 2 [Source:HGNC Symbol;Acc:28871]	immediate early response 5 [Source:ZFIN;Acc:ZDB-GENE-030616-127]
LOC101485728	LOC101485728	nucleus accumbens-associated protein 1%2C transcript variant X1	NC_036785.1	5100163	5137179	TF331184	NACC1	nucleus accumbens associated 1, BEN and BTB (POZ) domain containing [Source:HGNC Symbol;Acc:20967]	nucleus accumbens associated 1, BEN and BTB (POZ) domain containing [Source:HGNC Symbol;Acc:20967]
LOC101487551	trmt1	tRNA methyltransferase 1%2C transcript variant X1	NC_036785.1	5140345	5158103	TF300851	TRMT1	tRNA methyltransferase 1 homolog (S. cerevisiae) [Source:HGNC Symbol;Acc:25980]	tRNA methyltransferase 1 homolog (S. cerevisiae) [Source:ZFIN;Acc:ZDB-GENE-060810-40]
LOC101480656	lcor	ligand dependent nuclear receptor corepressor	NC_036785.1	5300322	5376345	TF319589	LCOR	ligand dependent nuclear receptor corepressor [Source:HGNC Symbol;Acc:29503]	ligand dependent nuclear receptor corepressor [Source:ZFIN;Acc:ZDB-GENE-061201-6]
LOC101480080	LOC101480080	MORN repeat-containing protein 4%2C transcript variant X1	NC_036785.1	5378610	5405629	TF323893	MORN4	MORN repeat containing 4 [Source:HGNC Symbol;Acc:24001]	MORN repeat containing 4 [Source:ZFIN;Acc:ZDB-GENE-050417-7]
LOC101479315	hoga1	4-hydroxy-2-oxoglutarate aldolase 1	NC_036785.1	5426989	5480604	TF324600	HOGA1	4-hydroxy-2-oxoglutarate aldolase 1 [Source:HGNC Symbol;Acc:25155]	4-hydroxy-2-oxoglutarate aldolase 1 [Source:ZFIN;Acc:ZDB-GENE-040426-2242]
LOC101479798	LOC101479798	metal transporter CNNM1	NC_036785.1	5486491	5509942	TF101012	CNNM1	cyclin M1 [Source:HGNC Symbol;Acc:102]	cyclin M1 [Source:ZFIN;Acc:ZDB-GENE-090312-51]
LOC101478476	LOC101478476	mitoferrin-2	NC_036785.1	5569623	5578496	TF314118	SLC25A28	solute carrier family 25 (mitochondrial iron transporter), member 28 [Source:HGNC Symbol;Acc:23472]	solute carrier family 25, member 28 [Source:ZFIN;Acc:ZDB-GENE-040426-2125]
LOC101478017	LOC101478017	ectonucleoside triphosphate diphosphohydrolase 7%2C transcript variant X1	NC_036785.1	5579148	5589818	TF354343	ENTPD7	ectonucleoside triphosphate diphosphohydrolase 7 [Source:HGNC Symbol;Acc:19745]	ectonucleoside triphosphate diphosphohydrolase 4 [Source:ZFIN;Acc:ZDB-GENE-040718-116]
LOC101477163	LOC101477163	CREB3 regulatory factor%2C transcript variant X1	NC_036785.1	5603256	5639282	TF330810	CREBRF	CREB3 regulatory factor [Source:HGNC Symbol;Acc:24050]	creb3 regulatory factor [Source:ZFIN;Acc:ZDB-GENE-120203-3]
LOC101486197	LOC101486197	hemicentin-1	NC_036785.1	5847258	5880925	TF326548	HSPG2	heparan sulfate proteoglycan 2 [Source:HGNC Symbol;Acc:5273]	heparan sulfate proteoglycan 2 [Source:ZFIN;Acc:ZDB-GENE-080807-4]
LOC101478196	LOC101478196	zinc finger protein 239	NC_036785.1	6640451	6650725	TF341817	ZNF470	zinc finger protein 470 [Source:HGNC Symbol;Acc:22220]	si:dkey-4c15.18 [Source:ZFIN;Acc:ZDB-GENE-050420-350]
LOC101482796	LOC101482796	glycine receptor subunit beta%2C transcript variant X1	NC_036785.1	6783063	6855751	TF315453	GLRB	glycine receptor, beta [Source:HGNC Symbol;Acc:4329]	glycine receptor, beta b [Source:ZFIN;Acc:ZDB-GENE-040801-106]
LOC101486053	LOC101486053	equilibrative nucleoside transporter 2%2C transcript variant X2	NC_036785.1	7046351	7056023	TF313950	SLC29A2	solute carrier family 29 (nucleoside transporters), member 2 [Source:HGNC Symbol;Acc:11004]	solute carrier family 29 (nucleoside transporters), member 2 [Source:ZFIN;Acc:ZDB-GENE-050220-15]
LOC101486541	LOC101486541	E3 ubiquitin-protein ligase pellino homolog 1	NC_036785.1	7059904	7076234	TF314338	PELI1	pellino E3 ubiquitin protein ligase 1 [Source:HGNC Symbol;Acc:8827]	pellino homolog 1b (Drosophila) [Source:ZFIN;Acc:ZDB-GENE-061027-372]
LOC112429667	LOC112429667		NC_036785.1	7236039	7252596	NA	NA	NA	NA
LOC101479929	LOC101479929	nuclear factor 7%2C brain	NC_036785.1	7360432	7378188	TF351086	TRIM25	tripartite motif containing 25 [Source:HGNC Symbol;Acc:12932]	bloodthirsty-related gene family, member 1 [Source:ZFIN;Acc:ZDB-GENE-090511-2]
LOC101481393	LOC101481393	dual specificity testis-specific protein kinase 1	NC_036785.1	7431392	7455003	TF318014	TESK1	testis-specific kinase 1 [Source:HGNC Symbol;Acc:11731]	testis-specific kinase 1 [Source:HGNC Symbol;Acc:11731]
LOC112429997	LOC112429997	thioredoxin-related transmembrane protein 2-B-like	NC_036785.1	7482478	7490470	TF314606	TMX2	thioredoxin-related transmembrane protein 2 [Source:HGNC Symbol;Acc:30739]	thioredoxin-related transmembrane protein 2b [Source:ZFIN;Acc:ZDB-GENE-040625-105]
LOC101481971	LOC101481971	palmitoyltransferase ZDHHC5%2C transcript variant X1	NC_036785.1	7496674	7530153	TF354263	ZDHHC5	zinc finger, DHHC-type containing 5 [Source:HGNC Symbol;Acc:18472]	zinc finger, DHHC-type containing 5a [Source:ZFIN;Acc:ZDB-GENE-090312-92]
LOC112434972	LOC112434972		NC_036785.1	7559904	7590375	NA	NA	NA	NA
LOC101477674	LOC101477674	teneurin-3	NC_036785.1	7593218	7725104	TF316833	TENM3	teneurin transmembrane protein 3 [Source:HGNC Symbol;Acc:29944]	si:dkey-237h12.3 [Source:ZFIN;Acc:ZDB-GENE-081027-3]
LOC112430000	LOC112430000	syntaxin-3-like	NC_036785.1	7928354	7935124	TF313763	STX3	syntaxin 3 [Source:HGNC Symbol;Acc:11438]	syntaxin 3 [Source:HGNC Symbol;Acc:11438]
LOC112429988	spcs3	signal peptidase complex subunit 3	NC_036785.1	7957276	7974381	TF300185	SPCS3	signal peptidase complex subunit 3 homolog (S. cerevisiae) [Source:HGNC Symbol;Acc:26212]	signal peptidase complex subunit 3 homolog (S. cerevisiae) [Source:ZFIN;Acc:ZDB-GENE-040426-2206]	None	NANoHomolog
LOC101487822	pex6	peroxisomal biogenesis factor 6%2C transcript variant X1	NC_036785.1	8009650	8031272	TF106428	PEX6	peroxisomal biogenesis factor 6 [Source:HGNC Symbol;Acc:8859]	peroxisomal biogenesis factor 6 [Source:HGNC Symbol;Acc:8859]
LOC112434925	LOC112434925	zinc finger protein with KRAB and SCAN domains 1-like	NC_036785.1	8182378	8188525	TF337091	ZFP41_HUMAN	Zinc finger protein 41 homolog [Source:UniProtKB/Swiss-Prot;Acc:Q8N8Y5]	si:ch211-89o9.6 [Source:ZFIN;Acc:ZDB-GENE-030131-7155]
LOC101464967	LOC101464967	glutathione S-transferase theta-3	NC_036785.1	8260991	8276819	TF325759	GSTT1	glutathione S-transferase theta 1 [Source:HGNC Symbol;Acc:4641]	glutathione S-transferase theta 1b [Source:ZFIN;Acc:ZDB-GENE-040426-1491]
LOC101467814	LOC101467814	RAC-gamma serine/threonine-protein kinase	NC_036785.1	8818295	8845462	TF102004	AKT3	v-akt murine thymoma viral oncogene homolog 3 (protein kinase B, gamma) [Source:HGNC Symbol;Acc:393]	Uncharacterized protein [Source:UniProtKB/TrEMBL;Acc:E7EXT6]
LOC101470447	LOC101470447	centriole%2C cilia and spindle-associated protein%2C transcript variant X1	NC_036785.1	8955396	8965424	TF332378	CCSAP	centriole, cilia and spindle-associated protein [Source:HGNC Symbol;Acc:29578]	centriole, cilia and spindle-associated protein [Source:HGNC Symbol;Acc:29578]
LOC101472770	wipf2	WAS/WASL interacting protein family member 2%2C transcript variant X1	NC_036785.1	9004817	9025247	TF332135	WIPF2	WAS/WASL interacting protein family, member 2 [Source:HGNC Symbol;Acc:30923]	WAS/WASL interacting protein family, member 2 [Source:HGNC Symbol;Acc:30923]
LOC101485844	socs7	suppressor of cytokine signaling 7%2C transcript variant X1	NC_036785.1	9106268	9131028	TF321368	SOCS7	suppressor of cytokine signaling 7 [Source:HGNC Symbol;Acc:29846]	suppressor of cytokine signaling 7 [Source:ZFIN;Acc:ZDB-GENE-080204-125]
LOC101464896	naf1	nuclear assembly factor 1 ribonucleoprotein	NC_036785.1	9248231	9268606	TF313273	NAF1	nuclear assembly factor 1 homolog (S. cerevisiae) [Source:HGNC Symbol;Acc:25126]	nuclear assembly factor 1 homolog (S. cerevisiae) [Source:ZFIN;Acc:ZDB-GENE-030131-4546]	None	NANoHomolog
LOC111500385	LOC111500385		NC_036785.1	9610545	9614642	NA	NA	NA	NA
LOC112434934	LOC112434934	uncharacterized LOC112434934	NC_036785.1	9669824	9677868	TF317412	NA	NA	Uncharacterized protein [Source:UniProtKB/TrEMBL;Acc:E7F1U5]
LOC112434935	LOC112434935		NC_036785.1	9730091	9734875	NA	NA	NA	NA
LOC112434933	LOC112434933	uncharacterized LOC112434933	NC_036785.1	9804125	9805127	NA	NA	NA	NA
LOC106674645	LOC106674645	uncharacterized LOC106674645	NC_036785.1	9980899	9984227	NA	NA	NA	NA
LOC112434937	LOC112434937	teneurin-3-like	NC_036785.1	10320167	10540359	TF352401	NA	NA	teneurin transmembrane protein 3 [Source:ZFIN;Acc:ZDB-GENE-990714-19]	NA	NoHomolog	None	NANoHomolog
LOC112434938	LOC112434938	teneurin-3-like	NC_036785.1	10540369	10589832	TF316833	TENM3	teneurin transmembrane protein 3 [Source:HGNC Symbol;Acc:29944]	si:dkey-237h12.3 [Source:ZFIN;Acc:ZDB-GENE-081027-3]
LOC101483772	LOC101483772	voltage-dependent calcium channel gamma-2 subunit	NC_036785.1	10773690	10842210	TF327980	CACNG2	calcium channel, voltage-dependent, gamma subunit 2 [Source:HGNC Symbol;Acc:1406]	calcium channel, voltage-dependent, gamma subunit 2a [Source:ZFIN;Acc:ZDB-GENE-040426-1401]
LOC101484327	syngr1	synaptogyrin 1%2C transcript variant X1	NC_036785.1	10864025	10894763	TF320995	SYNGR1	synaptogyrin 1 [Source:HGNC Symbol;Acc:11498]	synaptogyrin 1a [Source:ZFIN;Acc:ZDB-GENE-041010-169]
LOC101484781	tab1	TGF-beta activated kinase 1 (MAP3K7) binding protein 1%2C transcript variant X1	NC_036785.1	10896912	10925220	TF317785	TAB1	TGF-beta activated kinase 1/MAP3K7 binding protein 1 [Source:HGNC Symbol;Acc:18157]	TGF-beta activated kinase 1/MAP3K7 binding protein 1 [Source:ZFIN;Acc:ZDB-GENE-060628-1]
LOC101485628	mgat3	mannosyl (beta-1%2C4-)-glycoprotein beta-1%2C4-N-acetylglucosaminyltransferase%2C transcript variant X1	NC_036785.1	10930798	10984932	TF323781	MGAT3	mannosyl (beta-1,4-)-glycoprotein beta-1,4-N-acetylglucosaminyltransferase [Source:HGNC Symbol;Acc:7046]	Uncharacterized protein [Source:UniProtKB/TrEMBL;Acc:E7F3U6]
LOC101486983	LOC101486983	interleukin-2 receptor subunit beta%2C transcript variant X2	NC_036785.1	11206565	11222370	TF337874	IL2RB	interleukin 2 receptor, beta [Source:HGNC Symbol;Acc:6009]	interleukin 2 receptor, beta [Source:ZFIN;Acc:ZDB-GENE-080108-2]
LOC101465459	LOC101465459	apolipoprotein L3-like	NC_036785.1	11230037	11235086	TF334681	APOLD1	apolipoprotein L domain containing 1 [Source:HGNC Symbol;Acc:25268]	apolipoprotein L, 1 [Source:ZFIN;Acc:ZDB-GENE-030131-3217]
LOC101463630	LOC101463630	uncharacterized LOC101463630%2C transcript variant X3	NC_036785.1	11275823	11293866	TF323915	SUN2	Sad1 and UNC84 domain containing 2 [Source:HGNC Symbol;Acc:14210]	Sad1 and UNC84 domain containing 5 [Source:HGNC Symbol;Acc:16252]
LOC101487929	LOC101487929	mastermind-like domain-containing protein 1	NC_036785.1	11326232	11342034	TF319554	PDGFB	platelet-derived growth factor beta polypeptide [Source:HGNC Symbol;Acc:8800]	platelet-derived growth factor beta polypeptide [Source:HGNC Symbol;Acc:8800]
LOC101473904	mtnr1a	melatonin receptor 1A	NC_036785.1	12272396	12319346	TF331693	MTNR1A	melatonin receptor 1A [Source:HGNC Symbol;Acc:7463]	melatonin receptor 1A a [Source:ZFIN;Acc:ZDB-GENE-990415-155]
LOC101474200	fat1	FAT atypical cadherin 1%2C transcript variant X2	NC_036785.1	12334275	12415076	TF316403	FAT1	FAT tumor suppressor homolog 1 (Drosophila) [Source:HGNC Symbol;Acc:3595]	FAT tumor suppressor homolog 1 [Source:ZFIN;Acc:ZDB-GENE-050425-1]
LOC101476710	frg1	FSHD region gene 1	NC_036785.1	12832766	12848851	TF314108	FRG1	FSHD region gene 1 [Source:HGNC Symbol;Acc:3954]	FSHD region gene 1 [Source:HGNC Symbol;Acc:3954]
LOC101485263	LOC101485263	chromodomain-helicase-DNA-binding protein Mi-2 homolog%2C transcript variant X1	NC_036785.1	13226139	13240662	TF319557	2018-03-01	membrane-associated ring finger (C3HC4) 1, E3 ubiquitin protein ligase [Source:HGNC Symbol;Acc:26077]	membrane-associated ring finger (C3HC4) 1 [Source:ZFIN;Acc:ZDB-GENE-081112-1]
LOC101486299	fbxw7	F-box and WD repeat domain containing 7%2C transcript variant X1	NC_036785.1	13337256	13416831	TF101074	FBXW7	F-box and WD repeat domain containing 7, E3 ubiquitin protein ligase [Source:HGNC Symbol;Acc:16712]	F-box and WD repeat domain containing 7 [Source:ZFIN;Acc:ZDB-GENE-090313-79]
LOC101486589	dctpp1	dCTP pyrophosphatase 1	NC_036785.1	13620338	13621619	TF300237	DCTPP1	dCTP pyrophosphatase 1 [Source:HGNC Symbol;Acc:28777]	dCTP pyrophosphatase 1 [Source:HGNC Symbol;Acc:28777]
LOC101465738	dclk2	doublecortin like kinase 2%2C transcript variant X1	NC_036785.1	13878410	13921573	TF318770	DCLK2	doublecortin-like kinase 2 [Source:HGNC Symbol;Acc:19002]	doublecortin-like kinase 2 [Source:ZFIN;Acc:ZDB-GENE-050420-170]
LOC101466971	nr3c2	nuclear receptor subfamily 3 group C member 2%2C transcript variant X1	NC_036785.1	13986597	14075143	TF106510	NR3C2	nuclear receptor subfamily 3, group C, member 2 [Source:HGNC Symbol;Acc:7979]	nuclear receptor subfamily 3, group C, member 2 [Source:ZFIN;Acc:ZDB-GENE-060531-23]
LOC101468564	pou4f2	POU class 4 homeobox 2	NC_036785.1	14275211	14278410	TF316413	POU4F2	POU class 4 homeobox 2 [Source:HGNC Symbol;Acc:9219]	POU domain, class 4, transcription factor 2 [Source:ZFIN;Acc:ZDB-GENE-040401-1]
LOC101468869	lsm6	LSM6 homolog%2C U6 small nuclear RNA and mRNA degradation associated%2C transcript variant X2	NC_036785.1	14429331	14433497	TF313751	LSM6	LSM6 homolog, U6 small nuclear RNA associated (S. cerevisiae) [Source:HGNC Symbol;Acc:17017]	LSM6 homolog, U6 small nuclear RNA associated (S. cerevisiae) [Source:ZFIN;Acc:ZDB-GENE-040625-50]
LOC101469548	znf827	zinc finger protein 827%2C transcript variant X1	NC_036785.1	14447766	14519694	TF333046	ZNF827	zinc finger protein 827 [Source:HGNC Symbol;Acc:27193]	zinc finger protein 827 [Source:ZFIN;Acc:ZDB-GENE-080728-3]
LOC101470301	mmaa	methylmalonic aciduria (cobalamin deficiency) cblA type	NC_036785.1	14540087	14553066	TF313243	MMAA	methylmalonic aciduria (cobalamin deficiency) cblA type [Source:HGNC Symbol;Acc:18871]	methylmalonic aciduria (cobalamin deficiency) cblA type [Source:ZFIN;Acc:ZDB-GENE-070928-15]
LOC101478852	hhip	hedgehog interacting protein%2C transcript variant X1	NC_036785.1	14599624	14669574	TF329059	HHIP	hedgehog interacting protein [Source:HGNC Symbol;Acc:14866]	hedgehog interacting protein [Source:ZFIN;Acc:ZDB-GENE-030131-4827]
LOC101471751	gab1	GRB2 associated binding protein 1%2C transcript variant X1	NC_036785.1	14816759	14874245	TF329487	GAB1	GRB2-associated binding protein 1 [Source:HGNC Symbol;Acc:4066]	GRB2-associated binding protein 1 [Source:ZFIN;Acc:ZDB-GENE-040426-2674]
LOC106676542	LOC106676542	uncharacterized LOC106676542	NC_036785.1	14936157	14937175	NA	NA	NA	NA
LOC101473016	inpp4b	inositol polyphosphate-4-phosphatase type II B	NC_036785.1	15196743	15246916	TF325637	INPP4B	inositol polyphosphate-4-phosphatase, type II, 105kDa [Source:HGNC Symbol;Acc:6075]	inositol polyphosphate-4-phosphatase, type II [Source:ZFIN;Acc:ZDB-GENE-090312-97]
LOC101483861	cntln	centlein%2C transcript variant X1	NC_036785.1	15744389	15842513	TF329190	CNTLN	centlein, centrosomal protein [Source:HGNC Symbol;Acc:23432]	centlein, centrosomal protein [Source:HGNC Symbol;Acc:23432]
LOC101484322	bnc2	basonuclin 2%2C transcript variant X2	NC_036785.1	15851997	16018618	TF350399	BNC2	basonuclin 2 [Source:HGNC Symbol;Acc:30988]	basonuclin 2 [Source:ZFIN;Acc:ZDB-GENE-030131-5784]
LOC101467274	dkk2	dickkopf WNT signaling pathway inhibitor 2	NC_036785.1	16425796	16436673	TF330916	DKK2	dickkopf 2 homolog (Xenopus laevis) [Source:HGNC Symbol;Acc:2892]	dickkopf homolog 2 (Xenopus laevis) [Source:ZFIN;Acc:ZDB-GENE-080204-14]
LOC101468474	npnt	nephronectin%2C transcript variant X1	NC_036785.1	16641985	16699351	TF330819	NPNT	nephronectin [Source:HGNC Symbol;Acc:27405]	nephronectin [Source:ZFIN;Acc:ZDB-GENE-090312-201]
LOC101469823	gstcd	glutathione S-transferase C-terminal domain containing	NC_036785.1	16704391	16753570	TF324238	GSTCD	glutathione S-transferase, C-terminal domain containing [Source:HGNC Symbol;Acc:25806]	glutathione S-transferase, C-terminal domain containing [Source:ZFIN;Acc:ZDB-GENE-050320-41]
LOC101470589	tet2	tet methylcytosine dioxygenase 2	NC_036785.1	16790534	16817455	TF342373	TET3	tet methylcytosine dioxygenase 3 [Source:HGNC Symbol;Acc:28313]	tet methylcytosine dioxygenase 2 [Source:ZFIN;Acc:ZDB-GENE-090312-98]
LOC101471173	cxxc4	CXXC finger protein 4%2C transcript variant X1	NC_036785.1	16849419	16880334	TF326617	CXXC4	CXXC finger protein 4 [Source:HGNC Symbol;Acc:24593]	CXXC finger 4 [Source:ZFIN;Acc:ZDB-GENE-090313-179]
LOC101472535	mtap	methylthioadenosine phosphorylase	NC_036785.1	16973786	16998878	TF312883	MTAP	methylthioadenosine phosphorylase [Source:HGNC Symbol;Acc:7413]	methylthioadenosine phosphorylase [Source:ZFIN;Acc:ZDB-GENE-040426-1505]
LOC101473906	mxd4	MAX dimerization protein 4	NC_036785.1	17027741	17052170	TF315654	MXD4	MAX dimerization protein 4 [Source:HGNC Symbol;Acc:13906]	MAX dimerization protein 4 [Source:HGNC Symbol;Acc:13906]
LOC101475431	LOC101475431	early growth response protein 1-B-like	NC_036785.1	17128467	17131929	TF318980	EGR4	early growth response 4 [Source:HGNC Symbol;Acc:3241]	early growth response 4 [Source:HGNC Symbol;Acc:3241]
LOC101476223	smox	spermine oxidase	NC_036785.1	17233854	17250318	TF318348	SMOX	spermine oxidase [Source:HGNC Symbol;Acc:15862]	spermine oxidase [Source:ZFIN;Acc:ZDB-GENE-031201-3]
LOC111501543	trnas-cga	tRNA-Ser	NC_036785.1	17271489	17271570	NA	NA	NA	NA
LOC101483558	ufsp2	UFM1 specific peptidase 2	NC_036785.1	17517798	17524748	TF325896	UFSP2	UFM1-specific peptidase 2 [Source:HGNC Symbol;Acc:25640]	ufm1-specific peptidase 2 [Source:ZFIN;Acc:ZDB-GENE-030131-8726]
LOC101481439	LOC101481439	inactive ubiquitin carboxyl-terminal hydrolase 53%2C transcript variant X1	NC_036785.1	17576612	17602607	TF323194	USP53	ubiquitin specific peptidase 53 [Source:HGNC Symbol;Acc:29255]	ubiquitin specific peptidase 53b [Source:ZFIN;Acc:ZDB-GENE-090312-168]
LOC101469465	LOC101469465	neuromedin-K receptor	NC_036785.1	17998514	18022463	TF315303	TACR3	tachykinin receptor 3 [Source:HGNC Symbol;Acc:11528]	tachykinin receptor 3-like [Source:ZFIN;Acc:ZDB-GENE-061207-19]
LOC112434997	LOC112434997	putative nuclease HARBI1	NC_036785.1	18364478	18365235	TF327972	HARBI1	harbinger transposase derived 1 [Source:HGNC Symbol;Acc:26522]	Uncharacterized protein [Source:UniProtKB/TrEMBL;Acc:F1QYX7]
LOC101471657	ctnna2	catenin alpha 2	NC_036785.1	18578526	18913822	TF313686	CTNNA2	catenin (cadherin-associated protein), alpha 2 [Source:HGNC Symbol;Acc:2510]	catenin (cadherin-associated protein), alpha 2 [Source:ZFIN;Acc:ZDB-GENE-060815-3]
LOC112435055	LOC112435055	uncharacterized LOC112435055	NC_036785.1	18954859	18959615	NA	NA	NA	NA
LOC106675116	LOC106675116	serine/threonine-protein kinase PAK 3	NC_036785.1	19057106	19678223	TF320810	PIM3	pim-3 oncogene [Source:HGNC Symbol;Acc:19310]	si:dkeyp-104h9.7 [Source:ZFIN;Acc:ZDB-GENE-081104-450]
LOC101482754	lcorl	ligand dependent nuclear receptor corepressor like%2C transcript variant X1	NC_036785.1	20092016	20110000	TF319589	LCORL	ligand dependent nuclear receptor corepressor-like [Source:HGNC Symbol;Acc:30776]	ligand dependent nuclear receptor corepressor [Source:ZFIN;Acc:ZDB-GENE-061201-6]
LOC101467229	slit2	slit guidance ligand 2%2C transcript variant X1	NC_036785.1	20251204	20354138	TF332887	SLIT2	slit homolog 2 (Drosophila) [Source:HGNC Symbol;Acc:11086]	slit (Drosophila) homolog 2 [Source:ZFIN;Acc:ZDB-GENE-010306-3]
LOC101481881	LOC101481881	intelectin	NC_036785.1	20354968	20359935	TF328530	ITLN2	intelectin 2 [Source:HGNC Symbol;Acc:20599]	intelectin 2 [Source:ZFIN;Acc:ZDB-GENE-050411-58]
LOC101481585	LOC101481585	intelectin	NC_036785.1	20378693	20384162	TF328530	ITLN2	intelectin 2 [Source:HGNC Symbol;Acc:20599]	intelectin 2 [Source:ZFIN;Acc:ZDB-GENE-050411-58]
LOC101478437	pds5a	PDS5 cohesin associated factor A%2C transcript variant X2	NC_036785.1	20434133	20473769	TF106415	PDS5A	PDS5, regulator of cohesion maintenance, homolog A (S. cerevisiae) [Source:HGNC Symbol;Acc:29088]	PDS5, regulator of cohesion maintenance, homolog A (S. cerevisiae) [Source:ZFIN;Acc:ZDB-GENE-040426-1612]
LOC101476284	wdr19	WD repeat domain 19%2C transcript variant X1	NC_036785.1	20534018	20548112	TF314758	WDR19	WD repeat domain 19 [Source:HGNC Symbol;Acc:18340]	WD repeat domain 19 [Source:HGNC Symbol;Acc:18340]
LOC101464931	LOC101464931	uncharacterized LOC101464931	NC_036785.1	20725987	20730469	TF334840	NA	NA	Uncharacterized protein [Source:UniProtKB/TrEMBL;Acc:E7FEF4]
LOC101485488	gtf2e2	general transcription factor IIE subunit 2%2C transcript variant X2	NC_036785.1	20794484	20806123	TF105901	GTF2E2	general transcription factor IIE, polypeptide 2, beta 34kDa [Source:HGNC Symbol;Acc:4651]	general transcription factor IIE, polypeptide 2, beta [Source:ZFIN;Acc:ZDB-GENE-030131-6794]
LOC112435035	LOC112435035	uncharacterized LOC112435035	NC_036785.1	20888358	20890340	NA	NA	NA	NA
LOC112435029	LOC112435029	uncharacterized LOC112435029	NC_036785.1	20892040	20893480	NA	NA	NA	NA
LOC101483819	LOC101483819	adhesion G protein-coupled receptor L3	NC_036785.1	20944362	21062917	TF351999	LPHN3	latrophilin 3 [Source:HGNC Symbol;Acc:20974]	latrophilin 3.1 [Source:ZFIN;Acc:ZDB-GENE-030131-7856]
LOC101481401	LOC101481401	receptor-type tyrosine-protein phosphatase delta%2C transcript variant X1	NC_036785.1	21177385	21337873	TF312900	PTPRD	protein tyrosine phosphatase, receptor type, D [Source:HGNC Symbol;Acc:9668]	Uncharacterized protein [Source:UniProtKB/TrEMBL;Acc:E7F4G9]
LOC101479851	LOC101479851	lysine-specific demethylase 4C%2C transcript variant X1	NC_036785.1	21346338	21377125	TF106449	KDM4C	lysine (K)-specific demethylase 4C [Source:HGNC Symbol;Acc:17071]	lysine (K)-specific demethylase 4C [Source:HGNC Symbol;Acc:17071]
LOC105940653	LOC105940653	uncharacterized LOC105940653	NC_036785.1	21539884	21547212	TF333790	NA	NA	NA
LOC101484935	LOC101484935	retinal cone rhodopsin-sensitive cGMP 3'%2C5'-cyclic phosphodiesterase subunit gamma	NC_036785.1	21643080	21644708	TF333297	PDE6H	phosphodiesterase 6H, cGMP-specific, cone, gamma [Source:HGNC Symbol;Acc:8790]	phosphodiesterase 6H, cGMP-specific, cone, gamma [Source:ZFIN;Acc:ZDB-GENE-040426-1754]
LOC101481121	LOC101481121	activating transcription factor 7-interacting protein 1%2C transcript variant X2	NC_036785.1	21905712	21937605	TF329427	ATF7IP	activating transcription factor 7 interacting protein [Source:HGNC Symbol;Acc:20092]	activating transcription factor 7 interacting protein [Source:ZFIN;Acc:ZDB-GENE-061103-178]
LOC106675971	LOC106675971	uncharacterized LOC106675971	NC_036785.1	21960060	21962475	NA	NA	NA	NA
LOC111501218	LOC111501218	uncharacterized LOC111501218	NC_036785.1	22000674	22003900	TF101078	2018-09-09	septin 9 [Source:HGNC Symbol;Acc:7323]	septin 9a [Source:ZFIN;Acc:ZDB-GENE-030131-9187]
LOC101479296	mb	myoglobin%2C transcript variant X2	NC_036785.1	22043032	22049300	TF332967	MB	myoglobin [Source:HGNC Symbol;Acc:6915]	myoglobin [Source:ZFIN;Acc:ZDB-GENE-040426-1430]
LOC101475414	ap1m2	adaptor related protein complex 1 mu 2 subunit	NC_036785.1	22358882	22366349	TF300393	AP1M2	adaptor-related protein complex 1, mu 2 subunit [Source:HGNC Symbol;Acc:558]	adaptor-related protein complex 1, mu 2 subunit [Source:ZFIN;Acc:ZDB-GENE-041114-20]
LOC112429725	LOC112429725	nuclear factor 1 X-type%2C transcript variant X1	NC_036785.1	22537424	22584113	TF313889	NFIX	nuclear factor I/X (CCAAT-binding transcription factor) [Source:HGNC Symbol;Acc:7788]	nuclear factor I/Xb [Source:ZFIN;Acc:ZDB-GENE-060421-5000]
LOC101465713	pld6	phospholipase D family member 6%2C transcript variant X2	NC_036785.1	22639345	22644790	TF332817	PLD6	phospholipase D family, member 6 [Source:HGNC Symbol;Acc:30447]	phospholipase D family, member 6 [Source:ZFIN;Acc:ZDB-GENE-030131-3825]	None	NANoHomolog
LOC101466944	LOC101466944	transcription elongation factor 1 homolog	NC_036785.1	22644808	22648709	TF313731	ELOF1	elongation factor 1 homolog (S. cerevisiae) [Source:HGNC Symbol;Acc:28691]	elongation factor 1 homolog (S. cerevisiae) [Source:ZFIN;Acc:ZDB-GENE-040426-1385]	None	NANoHomolog
LOC101464840	LOC101464840	phospholipid phosphatase-related protein type 5%2C transcript variant X2	NC_036785.1	22663117	22730466	TF316040	LPPR2_HUMAN	Lipid phosphate phosphatase-related protein type 2 [Source:UniProtKB/Swiss-Prot;Acc:Q96GM1]	Uncharacterized protein [Source:UniProtKB/TrEMBL;Acc:E7F0D8]
LOC101486661	LOC101486661	uncharacterized LOC101486661%2C transcript variant X1	NC_036785.1	22905724	22944499	NA	NA	NA	NA
LOC101485137	LOC101485137	ATPase family AAA domain-containing protein 5	NC_036785.1	22977760	22983729	TF329112	ATAD5	ATPase family, AAA domain containing 5 [Source:HGNC Symbol;Acc:25752]	ATPase family, AAA domain containing 5b [Source:ZFIN;Acc:ZDB-GENE-030131-338]
LOC101482087	LOC101482087	trinucleotide repeat-containing gene 6C protein%2C transcript variant X3	NC_036785.1	23133617	23188062	TF329702	TNRC6C	trinucleotide repeat containing 6C [Source:HGNC Symbol;Acc:29318]	trinucleotide repeat containing 6C [Source:HGNC Symbol;Acc:29318]
LOC101485576	LOC101485576	ADP-ribosylation factor-binding protein GGA3	NC_036785.1	23596191	23605826	TF318574	GGA3	golgi-associated, gamma adaptin ear containing, ARF binding protein 3 [Source:HGNC Symbol;Acc:17079]	golgi associated, gamma adaptin ear containing, ARF binding protein 3 [Source:ZFIN;Acc:ZDB-GENE-041111-218]
LOC101485014	LOC101485014	melanin-concentrating hormone receptor 1-like	NC_036785.1	23640206	23642165	TF315737	MCHR1	melanin-concentrating hormone receptor 1 [Source:HGNC Symbol;Acc:4479]	melanin-concentrating hormone receptor 1a [Source:ZFIN;Acc:ZDB-GENE-030502-4]
LOC101483128	LOC101483128	netrin-1	NC_036785.1	23872580	23929559	TF352481	NTN1	netrin 1 [Source:HGNC Symbol;Acc:8029]	netrin 1a [Source:ZFIN;Acc:ZDB-GENE-990415-169]
LOC101479752	LOC101479752	alpha-1%2C6-mannosylglycoprotein 6-beta-N-acetylglucosaminyltransferase B%2C transcript variant X1	NC_036785.1	24121978	24258708	TF313714	MGAT5B	mannosyl (alpha-1,6-)-glycoprotein beta-1,6-N-acetyl-glucosaminyltransferase, isozyme B [Source:HGNC Symbol;Acc:24140]	mannosyl (alpha-1,6-)-glycoprotein beta-1,6-N-acetyl-glucosaminyltransferase, isozyme B [Source:HGNC Symbol;Acc:24140]
LOC101479175	LOC101479175	protein CYR61	NC_036785.1	24359407	24365646	TF326070	CYR61	cysteine-rich, angiogenic inducer, 61 [Source:HGNC Symbol;Acc:2654]	si:ch211-106h11.3 [Source:ZFIN;Acc:ZDB-GENE-050208-296]
LOC101473156	sphk1	sphingosine kinase 1	NC_036785.1	24871120	24914706	TF354296	SPHK1	sphingosine kinase 1 [Source:HGNC Symbol;Acc:11240]	sphingosine kinase 1 [Source:HGNC Symbol;Acc:11240]
LOC111500387	LOC111500387	CD209 antigen-like	NC_036785.1	25106977	25108838	TF333341	CLEC4E	C-type lectin domain family 4, member E [Source:HGNC Symbol;Acc:14555]	si:ch211-193e13.5 [Source:ZFIN;Acc:ZDB-GENE-081104-158]
LOC111500411	LOC111500411	CD209 antigen-like protein A	NC_036785.1	25217040	25220790	TF333341	CLEC4E	C-type lectin domain family 4, member E [Source:HGNC Symbol;Acc:14555]	si:ch211-193e13.5 [Source:ZFIN;Acc:ZDB-GENE-081104-158]
LOC101465587	bptf	bromodomain PHD finger transcription factor%2C transcript variant X1	NC_036785.1	25343608	25400244	TF316840	BPTF	bromodomain PHD finger transcription factor [Source:HGNC Symbol;Acc:3581]	Uncharacterized protein [Source:UniProtKB/TrEMBL;Acc:E7F366]
LOC101464257	prkca	protein kinase C alpha%2C transcript variant X1	NC_036785.1	25433217	25577068	TF351133	PRKCA	protein kinase C, alpha [Source:HGNC Symbol;Acc:9393]	protein kinase C, alpha [Source:ZFIN;Acc:ZDB-GENE-050208-100]
LOC101486154	pitpnc1	phosphatidylinositol transfer protein cytoplasmic 1%2C transcript variant X1	NC_036785.1	25711286	25789016	TF313279	PITPNC1	phosphatidylinositol transfer protein, cytoplasmic 1 [Source:HGNC Symbol;Acc:21045]	phosphatidylinositol transfer protein, cytoplasmic 1 [Source:HGNC Symbol;Acc:21045]
LOC101485846	LOC101485846	von Willebrand factor A domain-containing protein 7	NC_036785.1	25794285	25797361	TF329905	VWA7	von Willebrand factor A domain containing 7 [Source:HGNC Symbol;Acc:13939]	si:dkey-27f16.4 [Source:ZFIN;Acc:ZDB-GENE-090313-295]
LOC101484821	LOC101484821	tumor suppressor candidate 3	NC_036785.1	25963484	26050681	TF314850	TUSC3	tumor suppressor candidate 3 [Source:HGNC Symbol;Acc:30242]	magnesium transporter 1 [Source:ZFIN;Acc:ZDB-GENE-030131-3667]
LOC101484541	sgcz	sarcoglycan zeta	NC_036785.1	26057359	26435917	TF313538	SGCZ	sarcoglycan, zeta [Source:HGNC Symbol;Acc:14075]	sarcoglycan, zeta [Source:HGNC Symbol;Acc:14075]
LOC106674585	LOC106674585	uncharacterized LOC106674585	NC_036785.1	26510830	26512193	NA	NA	NA	NA
LOC101484277	LOC101484277	tudor domain-containing protein 7A	NC_036785.1	26603010	26620737	TF342664	TDRD5	tudor domain containing 5 [Source:HGNC Symbol;Acc:20614]	tudor domain containing 5 [Source:ZFIN;Acc:ZDB-GENE-050208-502]
LOC101476562	LOC101476562	neuronal vesicle trafficking-associated protein 1%2C transcript variant X2	NC_036785.1	26916966	26927186	TF332232	NSG1_HUMAN	Neuron-specific protein family member 1 [Source:UniProtKB/Swiss-Prot;Acc:P42857]	calcyon neuron-specific vesicular protein [Source:ZFIN;Acc:ZDB-GENE-090313-405]
LOC101475182	LOC101475182	ependymin	NC_036785.1	27013522	27018005	TF328581	EPDR1	ependymin related protein 1 (zebrafish) [Source:HGNC Symbol;Acc:17572]	ependymin-like 1 [Source:ZFIN;Acc:ZDB-GENE-090710-3]
LOC101474890	adra2a	adrenoceptor alpha 2A	NC_036785.1	27104073	27108562	TF316350	ADRA2A	adrenoceptor alpha 2A [Source:HGNC Symbol;Acc:281]	adrenergic, alpha-2A-, receptor [Source:ZFIN;Acc:ZDB-GENE-021010-1]
LOC101473453	rbm20	RNA binding motif protein 20%2C transcript variant X1	NC_036785.1	27149232	27205873	TF333921	RBM20	RNA binding motif protein 20 [Source:HGNC Symbol;Acc:27424]	matrin 3-like 1.1 [Source:ZFIN;Acc:ZDB-GENE-030616-40]
LOC101473155	smc3	structural maintenance of chromosomes 3	NC_036785.1	27218360	27244913	TF105602	SMC3	structural maintenance of chromosomes 3 [Source:HGNC Symbol;Acc:2468]	structural maintenance of chromosomes 3 [Source:ZFIN;Acc:ZDB-GENE-030131-3196]
LOC101469013	LOC101469013	stromal cell-derived factor 1	NC_036785.1	27585637	27599295	TF353159	CXCL12	chemokine (C-X-C motif) ligand 12 [Source:HGNC Symbol;Acc:10672]	chemokine (C-X-C motif) ligand 12b (stromal cell-derived factor 1) [Source:ZFIN;Acc:ZDB-GENE-030721-1]
LOC101464439	LOC101464439	CD97 antigen%2C transcript variant X1	NC_036785.1	27848696	27864014	TF316380	CD97	CD97 molecule [Source:HGNC Symbol;Acc:1711]	Uncharacterized protein [Source:UniProtKB/TrEMBL;Acc:E7F287]
LOC101486153	LOC101486153	uncharacterized LOC101486153	NC_036785.1	27956876	27958903	TF338523	TNFSF9	tumor necrosis factor (ligand) superfamily, member 9 [Source:HGNC Symbol;Acc:11939]	NA
LOC101485665	LOC101485665	tumor necrosis factor ligand superfamily member 14%2C transcript variant X2	NC_036785.1	27962560	27965289	TF332169	TNFSF14	tumor necrosis factor (ligand) superfamily, member 14 [Source:HGNC Symbol;Acc:11930]	tumor necrosis factor (ligand) superfamily, member 10 [Source:ZFIN;Acc:ZDB-GENE-040718-335]
LOC101481973	LOC101481973	uncharacterized LOC101481973	NC_036785.1	28020583	28025062	TF334441	ADORA3	adenosine A3 receptor [Source:HGNC Symbol;Acc:268]	Uncharacterized protein [Source:UniProtKB/TrEMBL;Acc:F1QLB3]
LOC112434980	LOC112434980	uncharacterized LOC112434980	NC_036785.1	28026528	28033131	TF334441	NCR2	natural cytotoxicity triggering receptor 2 [Source:HGNC Symbol;Acc:6732]	si:ch211-114l13.12 [Source:ZFIN;Acc:ZDB-GENE-120215-211]
LOC101476652	LOC101476652	polymeric immunoglobulin receptor-like	NC_036785.1	28734152	28739276	TF334441	NCR2	natural cytotoxicity triggering receptor 2 [Source:HGNC Symbol;Acc:6732]	polymeric immunoglobulin receptor [Source:ZFIN;Acc:ZDB-GENE-060503-327]
LOC106676067	LOC106676067	guanine nucleotide-binding protein G(I)/G(S)/G(O) subunit gamma-10	NC_036785.1	29300287	29308678	TF319909	GNG5	guanine nucleotide binding protein (G protein), gamma 5 [Source:HGNC Symbol;Acc:4408]	guanine nucleotide binding protein (G protein), gamma 5 [Source:ZFIN;Acc:ZDB-GENE-030131-9966]
LOC112434983	LOC112434983	uncharacterized protein K02A2.6-like	NC_036785.1	29311057	29315128	TF323003	NA	NA	Uncharacterized protein [Source:UniProtKB/TrEMBL;Acc:E7FCV9]
LOC101474790	LOC101474790	deleted in malignant brain tumors 1 protein-like	NC_036785.1	29315899	29352834	TF329295	SSC5D	scavenger receptor cysteine rich domain containing (5 domains) [Source:HGNC Symbol;Acc:26641]	si:dkey-21h14.9 [Source:ZFIN;Acc:ZDB-GENE-110915-1]
LOC101486244	LOC101486244	transcription factor MafG%2C transcript variant X2	NC_036785.1	29479807	29500377	TF325689	MAFG	v-maf musculoaponeurotic fibrosarcoma oncogene homolog G (avian) [Source:HGNC Symbol;Acc:6781]	v-maf musculoaponeurotic fibrosarcoma oncogene homolog g (avian), 2 [Source:ZFIN;Acc:ZDB-GENE-040426-2403]
LOC101483995	tmc6	transmembrane channel like 6%2C transcript variant X1	NC_036785.1	29601653	29619704	TF313462	TMC6	transmembrane channel-like 6 [Source:HGNC Symbol;Acc:18021]	transmembrane channel-like 6 [Source:HGNC Symbol;Acc:18021]
LOC101478427	LOC101478427	junction plakoglobin	NC_036785.1	29787122	29806982	TF317997	JUP	junction plakoglobin [Source:HGNC Symbol;Acc:6207]	junction plakoglobin a [Source:ZFIN;Acc:ZDB-GENE-991207-22]
LOC101474888	lbx1	ladybird homeobox 1	NC_036785.1	29918118	29920020	TF325047	LBX1	ladybird homeobox 1 [Source:HGNC Symbol;Acc:16960]	ladybird homeobox 1b [Source:ZFIN;Acc:ZDB-GENE-050309-27]
LOC101473944	poll	DNA polymerase lambda	NC_036785.1	30005751	30012238	TF103011	POLL	polymerase (DNA directed), lambda [Source:HGNC Symbol;Acc:9184]	polymerase (DNA directed), lambda [Source:ZFIN;Acc:ZDB-GENE-040426-2712]
LOC101473564	wbp1l	WW domain binding protein 1 like%2C transcript variant X1	NC_036785.1	30012622	30033304	TF330726	WBP1L	WW domain binding protein 1-like [Source:HGNC Symbol;Acc:23510]	WW domain binding protein 1-like b [Source:ZFIN;Acc:ZDB-GENE-050522-112]
LOC101470843	pdcd11	programmed cell death 11%2C transcript variant X1	NC_036785.1	30158348	30172747	TF105697	PDCD11	programmed cell death 11 [Source:HGNC Symbol;Acc:13408]	programmed cell death 11 [Source:ZFIN;Acc:ZDB-GENE-030131-4076]
LOC101467413	LOC101467413	B-cell lymphoma/leukemia 11A	NC_036785.1	30278575	30311545	TF318131	BCL11A	B-cell CLL/lymphoma 11A (zinc finger protein) [Source:HGNC Symbol;Acc:13221]	B-cell CLL/lymphoma 11Ab [Source:ZFIN;Acc:ZDB-GENE-061009-4]
LOC111501266	tmc7	transmembrane channel like 7%2C transcript variant X1	NC_036785.1	30523387	30535025	TF313462	TMC7	transmembrane channel-like 7 [Source:HGNC Symbol;Acc:23000]	transmembrane channel-like 4 [Source:ZFIN;Acc:ZDB-GENE-030131-7489]
LOC101465791	LOC101465791	nodal modulator 1	NC_036785.1	30535566	30550320	TF313696	NOMO3	NODAL modulator 3 [Source:HGNC Symbol;Acc:25242]	nodal modulator [Source:ZFIN;Acc:ZDB-GENE-040826-3]
LOC106676076	LOC106676076	uncharacterized LOC106676076	NC_036785.1	30575351	30576117	NA	NA	NA	NA
LOC101465497	xylt1	xylosyltransferase 1	NC_036785.1	30640633	30726950	TF315534	XYLT1	xylosyltransferase I [Source:HGNC Symbol;Acc:15516]	xylosyltransferase I [Source:ZFIN;Acc:ZDB-GENE-111017-2]
LOC101464353	LOC101464353	multidrug resistance-associated protein 1	NC_036785.1	30823823	30850338	TF105199	ABCC6	ATP-binding cassette, sub-family C (CFTR/MRP), member 6 [Source:HGNC Symbol;Acc:57]	ATP-binding cassette, sub-family C (CFTR/MRP), member 6a [Source:ZFIN;Acc:ZDB-GENE-050517-18]
LOC101464070	fopnl	FGFR1OP N-terminal like	NC_036785.1	30857165	30859321	TF328861	FOPNL	FGFR1OP N-terminal like [Source:HGNC Symbol;Acc:26435]	fgfr1op N-terminal like [Source:ZFIN;Acc:ZDB-GENE-101124-1]
LOC101481574	LOC101481574	nuclear factor interleukin-3-regulated protein	NC_036785.1	31025455	31027910	TF344219	NA	NA	nuclear factor, interleukin 3 regulated, member 6 [Source:ZFIN;Acc:ZDB-GENE-040704-63]
LOC101474336	LOC101474336	protein Dok-7%2C transcript variant X1	NC_036785.1	31418551	31446983	TF332288	DOK7	docking protein 7 [Source:HGNC Symbol;Acc:26594]	docking protein 7 [Source:ZFIN;Acc:ZDB-GENE-090312-103]
LOC101474612	lrpap1	LDL receptor related protein associated protein 1	NC_036785.1	31446799	31459881	TF320678	LRPAP1	low density lipoprotein receptor-related protein associated protein 1 [Source:HGNC Symbol;Acc:6701]	low density lipoprotein receptor-related protein associated protein 1 [Source:ZFIN;Acc:ZDB-GENE-030131-5871]
LOC101474048	LOC101474048	alpha-2C adrenergic receptor-like	NC_036785.1	31566446	31570119	TF316350	ADRA2C	adrenoceptor alpha 2C [Source:HGNC Symbol;Acc:283]	adrenergic, alpha-2C-, receptor [Source:ZFIN;Acc:ZDB-GENE-021010-3]
LOC112435053	LOC112435053	uncharacterized LOC112435053	NC_036785.1	31694415	31696169	TF343847	NA	NA	Uncharacterized protein [Source:UniProtKB/TrEMBL;Acc:F1QLL4]
LOC101473740	LOC101473740	homeobox protein HMX1	NC_036785.1	31729203	31732003	TF320562	HMX1	H6 family homeobox 1 [Source:HGNC Symbol;Acc:5017]	H6 homeo box 1 [Source:ZFIN;Acc:ZDB-GENE-080204-54]
LOC101472966	LOC101472966	carboxypeptidase Z%2C transcript variant X1	NC_036785.1	31789474	31796789	TF315592	CPZ	carboxypeptidase Z [Source:HGNC Symbol;Acc:2333]	carboxypeptidase Z [Source:ZFIN;Acc:ZDB-GENE-090313-267]
LOC101471902	LOC101471902	phosphatidylinositol 4-kinase type 2-beta	NC_036785.1	31825880	31839130	TF314740	PI4K2B	phosphatidylinositol 4-kinase type 2 beta [Source:HGNC Symbol;Acc:18215]	phosphatidylinositol 4-kinase type 2 beta [Source:ZFIN;Acc:ZDB-GENE-070112-990]
LOC101471604	LOC101471604	cysteine-rich protein 1	NC_036785.1	31841120	31842851	TF313758	CRIP2	cysteine-rich protein 2 [Source:HGNC Symbol;Acc:2361]	cysteine-rich protein 2 [Source:HGNC Symbol;Acc:2361]
LOC101471307	LOC101471307	E3 ubiquitin-protein ligase RNF38	NC_036785.1	31851894	31876956	TF325756	RNF38	ring finger protein 38 [Source:HGNC Symbol;Acc:18052]	ring finger protein 38 [Source:HGNC Symbol;Acc:18052]
LOC101471024	LOC101471024	neuronal acetylcholine receptor subunit beta-2	NC_036785.1	31890435	31903290	TF315605	CHRNB4	cholinergic receptor, nicotinic, beta 4 (neuronal) [Source:HGNC Symbol;Acc:1964]	cholinergic receptor, nicotinic, beta 2a [Source:ZFIN;Acc:ZDB-GENE-090312-169]
LOC101470744	LOC101470744	neuronal acetylcholine receptor subunit alpha-3	NC_036785.1	31915843	31944391	TF315605	CHRNA6	cholinergic receptor, nicotinic, alpha 6 (neuronal) [Source:HGNC Symbol;Acc:15963]	cholinergic receptor, nicotinic, alpha 6 [Source:ZFIN;Acc:ZDB-GENE-090312-91]
LOC101470163	LOC101470163	neuronal acetylcholine receptor subunit alpha-7%2C transcript variant X2	NC_036785.1	31980856	32024517	TF315605	CHRNA7	cholinergic receptor, nicotinic, alpha 7 (neuronal) [Source:HGNC Symbol;Acc:1960]	Uncharacterized protein [Source:UniProtKB/TrEMBL;Acc:H9GX99]
LOC101468827	sclt1	sodium channel and clathrin linker 1	NC_036785.1	32089400	32105384	TF331372	SCLT1	sodium channel and clathrin linker 1 [Source:HGNC Symbol;Acc:26406]	sodium channel and clathrin linker 1 [Source:ZFIN;Acc:ZDB-GENE-030131-3278]
LOC101469318	lg6h4orf33	linkage group 6 C4orf33 homolog%2C transcript variant X1	NC_036785.1	32105423	32112091	TF313077	C4orf33	chromosome 4 open reading frame 33 [Source:HGNC Symbol;Acc:27025]	chromosome 4 open reading frame 33 [Source:HGNC Symbol;Acc:27025]
LOC112435032	LOC112435032	mitogen-activated protein kinase kinase kinase 2-like	NC_036785.1	32359259	32360993	TF101081	NA	NA	NA
LOC112434901	LOC112434901	uncharacterized LOC112434901	NC_036785.1	32362601	32362999	NA	NA	NA	NA
LOC112434902	LOC112434902	uncharacterized LOC112434902	NC_036785.1	32363006	32364108	NA	NA	NA	NA
LOC112435049	LOC112435049	mitogen-activated protein kinase kinase kinase 2-like	NC_036785.1	32433714	32435459	TF101081	NA	NA	NA
LOC112434985	LOC112434985	uncharacterized LOC112434985	NC_036785.1	32435470	32437320	TF354128	NA	NA	zgc:174680 [Source:ZFIN;Acc:ZDB-GENE-080204-24]
LOC112434952	LOC112434952	uncharacterized LOC112434952	NC_036785.1	32439029	32439973	NA	NA	NA	NA
LOC106676077	LOC106676077	uncharacterized LOC106676077	NC_036785.1	32456467	32472329	NoHit	NA	NA	NA
LOC101468123	LOC101468123	protocadherin-10%2C transcript variant X1	NC_036785.1	32556018	32574506	TF352008	PCDH10	protocadherin 10 [Source:HGNC Symbol;Acc:13404]	protocadherin 10a [Source:ZFIN;Acc:ZDB-GENE-020731-1]
LOC106676063	LOC106676063	zinc finger BED domain-containing protein 1-like	NC_036785.1	32583176	32585082	TF322818	ZBED4	zinc finger, BED-type containing 4 [Source:HGNC Symbol;Acc:20721]	Uncharacterized protein [Source:UniProtKB/TrEMBL;Acc:F1QQZ2]
LOC106675703	LOC106675703	uncharacterized LOC106675703	NC_036785.1	32663313	32664226	NoHit	NA	NA	NA
LOC101467625	pcdh18	protocadherin 18%2C transcript variant X1	NC_036785.1	32952625	32960662	TF352008	PCDH18	protocadherin 18 [Source:HGNC Symbol;Acc:14268]	protocadherin 18a [Source:ZFIN;Acc:ZDB-GENE-000607-1]
LOC101467315	LOC101467315	zinc finger protein 497	NC_036785.1	33449512	33455638	TF350834	NA	NA	Uncharacterized protein [Source:UniProtKB/TrEMBL;Acc:E7F8E6]
LOC101465884	LOC101465884	calcium-binding protein 1%2C transcript variant X1	NC_036785.1	33512075	33541972	TF334804	CABP2	calcium binding protein 2 [Source:HGNC Symbol;Acc:1385]	zgc:112300 [Source:ZFIN;Acc:ZDB-GENE-050913-25]
LOC101485209	LOC101485209	perforin-1	NC_036785.1	33842603	33844946	TF330498	PRF1	perforin 1 (pore forming protein) [Source:HGNC Symbol;Acc:9360]	perforin 1.8 [Source:ZFIN;Acc:ZDB-GENE-111212-12]
LOC101484908	LOC101484908	axin-2%2C transcript variant X3	NC_036785.1	33898333	33952321	TF315454	AXIN2	axin 2 [Source:HGNC Symbol;Acc:904]	axin 2 (conductin, axil) [Source:ZFIN;Acc:ZDB-GENE-000403-2]
LOC101484722	LOC101484722	uncharacterized LOC101484722	NC_036785.1	33956905	33985330	NA	NA	NA	NA
LOC101484438	LOC101484438	FERM and PDZ domain-containing protein 1%2C transcript variant X1	NC_036785.1	34063239	34112093	TF316497	FRMPD1	FERM and PDZ domain containing 1 [Source:HGNC Symbol;Acc:29159]	FERM and PDZ domain containing 1 [Source:HGNC Symbol;Acc:29159]
LOC101484164	LOC101484164	multidrug and toxin extrusion protein 1%2C transcript variant X1	NC_036785.1	34164609	34174194	TF324441	SLC47A1	solute carrier family 47, member 1 [Source:HGNC Symbol;Acc:25588]	solute carrier family 47, member 2 [Source:ZFIN;Acc:ZDB-GENE-070112-1472]
LOC101483408	LOC101483408	high affinity choline transporter 1	NC_036785.1	34247208	34267534	TF314588	SLC5A7	solute carrier family 5 (choline transporter), member 7 [Source:HGNC Symbol;Acc:14025]	solute carrier family 5 (choline transporter), member 7 [Source:HGNC Symbol;Acc:14025]
LOC101483125	exosc9	exosome component 9	NC_036785.1	34281462	34286396	TF300092	EXOSC9	exosome component 9 [Source:HGNC Symbol;Acc:9137]	exosome component 9 [Source:ZFIN;Acc:ZDB-GENE-041010-180]
LOC101481869	maml3	mastermind like transcriptional coactivator 3	NC_036785.1	34340546	34474228	TF332922	MAML3	mastermind-like 3 (Drosophila) [Source:HGNC Symbol;Acc:16272]	mastermind-like 3 (Drosophila) [Source:ZFIN;Acc:ZDB-GENE-090313-292]
LOC101478528	noct	nocturnin%2C transcript variant X5	NC_036785.1	34555287	34570336	TF323175	CCRN4L	CCR4 carbon catabolite repression 4-like (S. cerevisiae) [Source:HGNC Symbol;Acc:14254]	CCR4 carbon catabolite repression 4-like a (S. cerevisiae) [Source:ZFIN;Acc:ZDB-GENE-050208-306]
LOC101477781	LOC101477781	solute carrier family 43 member 3%2C transcript variant X1	NC_036785.1	34580403	34592351	TF328358	SLC43A3	solute carrier family 43, member 3 [Source:HGNC Symbol;Acc:17466]	solute carrier family 43, member 3a [Source:ZFIN;Acc:ZDB-GENE-110208-8]
LOC101477503	LOC101477503	E3 SUMO-protein ligase CBX4	NC_036785.1	34721152	34728907	TF106456	CBX4	chromobox homolog 4 [Source:HGNC Symbol;Acc:1554]	chromobox homolog 4 (Pc class homolog, Drosophila) [Source:ZFIN;Acc:ZDB-GENE-040329-2]
LOC101475981	LOC101475981	E3 ubiquitin/ISG15 ligase TRIM25	NC_036785.1	34764066	34780689	TF351086	TRIM25	tripartite motif containing 25 [Source:HGNC Symbol;Acc:12932]	tripartite motif-containing 25 [Source:ZFIN;Acc:ZDB-GENE-040426-797]
LOC101473359	endov	endonuclease V%2C transcript variant X3	NC_036785.1	34922004	35011059	TF300065	ENDOV	endonuclease V [Source:HGNC Symbol;Acc:26640]	NA	None	NANoHomolog
LOC101472178	rptor	regulatory associated protein of MTOR complex 1%2C transcript variant X2	NC_036785.1	35058575	35276744	TF105729	RPTOR	regulatory associated protein of MTOR, complex 1 [Source:HGNC Symbol;Acc:30287]	Uncharacterized protein [Source:UniProtKB/TrEMBL;Acc:E7F7S1]
LOC101481688	LOC101481688	potassium voltage-gated channel subfamily KQT member 5%2C transcript variant X1	NC_036785.1	35971885	36109230	TF315186	KCNQ5	potassium voltage-gated channel, KQT-like subfamily, member 5 [Source:HGNC Symbol;Acc:6299]	potassium voltage-gated channel, KQT-like subfamily, member 5b [Source:ZFIN;Acc:ZDB-GENE-090312-178]
LOC101480231	LOC101480231	sodium/potassium/calcium exchanger 3	NC_036785.1	36187704	36246697	TF318759	SLC24A3	solute carrier family 24 (sodium/potassium/calcium exchanger), member 3 [Source:HGNC Symbol;Acc:10977]	solute carrier family 24 (sodium/potassium/calcium exchanger), member 3 [Source:ZFIN;Acc:ZDB-GENE-090312-67]
LOC101478894	LOC101478894	E3 ubiquitin-protein ligase DTX1%2C transcript variant X2	NC_036785.1	36276412	36317781	TF325526	DTX4	deltex homolog 4 (Drosophila) [Source:HGNC Symbol;Acc:29151]	deltex1 [Source:RefSeq peptide;Acc:NP_001120780]
LOC111501270	trnak-uuu	tRNA-Lys	NC_036785.1	36319163	36319235	NA	NA	NA	NA
LOC101478614	LOC101478614		NC_036785.1	36319650	36323016	NA	NA	NA	NA
LOC101478146	LOC101478146	ribosomal protein S6 kinase beta-2%2C transcript variant X2	NC_036785.1	36326657	36340461	TF313438	RPS6KB2	ribosomal protein S6 kinase, 70kDa, polypeptide 2 [Source:HGNC Symbol;Acc:10437]	ribosomal protein S6 kinase b, polypeptide 1b [Source:ZFIN;Acc:ZDB-GENE-040426-2038]
LOC112435044	LOC112435044	uncharacterized LOC112435044	NC_036785.1	36424831	36425615	NA	NA	NA	NA
LOC101469016	LOC101469016	VPS10 domain-containing receptor SorCS1%2C transcript variant X3	NC_036785.1	36581051	36777703	TF324918	SORCS1	sortilin-related VPS10 domain containing receptor 1 [Source:HGNC Symbol;Acc:16697]	Uncharacterized protein [Source:UniProtKB/TrEMBL;Acc:E7F5V2]
LOC101468732	LOC101468732	VPS10 domain-containing receptor SorCS3	NC_036785.1	36885028	37126938	TF324918	SORCS3	sortilin-related VPS10 domain containing receptor 3 [Source:HGNC Symbol;Acc:16699]	Uncharacterized protein [Source:UniProtKB/TrEMBL;Acc:E7F2Z8]
LOC105940859	LOC105940859	uncharacterized LOC105940859	NC_036785.1	37287058	37291965	NA	NA	NA	NA
LOC101477676	LOC101477676	uncharacterized LOC101477676%2C transcript variant X1	NC_036785.1	37348829	37351496	NA	NA	NA	NA
LOC101476063	LOC101476063	SH3 and PX domain-containing protein 2A%2C transcript variant X1	NC_036785.1	37435085	37531294	TF329347	SH3PXD2A	SH3 and PX domains 2A [Source:HGNC Symbol;Acc:23664]	SH3 and PX domains 2Aa [Source:ZFIN;Acc:ZDB-GENE-060503-271]
LOC101474155	LOC101474155	serine/threonine-protein kinase 10%2C transcript variant X1	NC_036785.1	37542537	37566823	TF351445	SLK	STE20-like kinase [Source:HGNC Symbol;Acc:11088]	STE20-like kinase b [Source:ZFIN;Acc:ZDB-GENE-030131-1684]
LOC112435007	LOC112435007	NLR family CARD domain-containing protein 3-like	NC_036785.1	37803342	37817238	TF352120	NA	NA	si:dkey-13n15.11 [Source:ZFIN;Acc:ZDB-GENE-070705-295]
LOC101469678	LOC101469678	phosphomannomutase 2	NC_036785.1	38165591	38172708	TF300874	PMM2	phosphomannomutase 2 [Source:HGNC Symbol;Acc:9115]	phosphomannomutase 2 [Source:ZFIN;Acc:ZDB-GENE-030722-6]
LOC101469414	LOC101469414	high mobility group protein B2	NC_036785.1	38175491	38177895	TF105371	HMGB4	high mobility group box 4 [Source:HGNC Symbol;Acc:24954]	high-mobility group box 2a [Source:ZFIN;Acc:ZDB-GENE-051120-126]
LOC101465500	wdr17	WD repeat domain 17%2C transcript variant X1	NC_036785.1	38178845	38215176	TF323190	WDR17	WD repeat domain 17 [Source:HGNC Symbol;Acc:16661]	WD repeat domain 17 [Source:ZFIN;Acc:ZDB-GENE-090313-131]
LOC101469124	hpgd	15-hydroxyprostaglandin dehydrogenase	NC_036785.1	38218093	38233172	TF324093	HPGD	hydroxyprostaglandin dehydrogenase 15-(NAD) [Source:HGNC Symbol;Acc:5154]	Uncharacterized protein [Source:UniProtKB/TrEMBL;Acc:E7F258]
LOC101468327	LOC101468327	glycine receptor subunit alphaZ1%2C transcript variant X1	NC_036785.1	38235364	38284309	TF315453	GLRA3	glycine receptor, alpha 3 [Source:HGNC Symbol;Acc:4328]	glycine receptor, alpha 3 [Source:HGNC Symbol;Acc:4328]
LOC101466655	LOC101466655	striatin%2C transcript variant X1	NC_036785.1	38422032	38454873	TF313387	STRN	striatin, calmodulin binding protein [Source:HGNC Symbol;Acc:11424]	striatin, calmodulin binding protein [Source:HGNC Symbol;Acc:11424]
LOC101466369	LOC101466369	BTB/POZ domain-containing protein 3	NC_036785.1	38457388	38463434	TF106482	BTBD3	BTB (POZ) domain containing 3 [Source:HGNC Symbol;Acc:15854]	BTB (POZ) domain containing 3a [Source:ZFIN;Acc:ZDB-GENE-090312-7]
LOC101464435	aplf	aprataxin and PNKP like factor	NC_036785.1	38515333	38522643	TF326160	APLF	aprataxin and PNKP like factor [Source:HGNC Symbol;Acc:28724]	NA
LOC101464071	LOC101464071	prokineticin receptor 1-like	NC_036785.1	38525161	38530922	TF315303	PROKR2	prokineticin receptor 2 [Source:HGNC Symbol;Acc:15836]	prokineticin receptor 1a [Source:ZFIN;Acc:ZDB-GENE-110411-180]
LOC101485207	LOC101485207	ewing's tumor-associated antigen 1 homolog	NC_036785.1	38613053	38617523	TF333863	ETAA1	Ewing tumor-associated antigen 1 [Source:HGNC Symbol;Acc:24648]	NA	None	NANoHomolog
LOC101484539	LOC101484539	sprouty-related%2C EVH1 domain-containing protein 2%2C transcript variant X1	NC_036785.1	38657134	38666587	TF321411	SPRED2	sprouty-related, EVH1 domain containing 2 [Source:HGNC Symbol;Acc:17722]	sprouty-related, EVH1 domain containing 2b [Source:ZFIN;Acc:ZDB-GENE-040426-2342]
LOC101482843	LOC101482843	NACHT%2C LRR and PYD domains-containing protein 3-like	NC_036785.1	38697476	38714628	TF352120	NA	NA	CantFind
LOC101487495	LOC101487495	sodium/calcium exchanger 1%2C transcript variant X3	NC_036785.1	38725813	38756408	TF314308	SLC8A1	solute carrier family 8 (sodium/calcium exchanger), member 1 [Source:HGNC Symbol;Acc:11068]	solute carrier family 8 (sodium/calcium exchanger), member 1a [Source:ZFIN;Acc:ZDB-GENE-050809-1]
LOC101482260	LOC101482260	NACHT%2C LRR and PYD domains-containing protein 3%2C transcript variant X4	NC_036785.1	38807831	38831444	TF351088	NA	NA	Uncharacterized protein [Source:UniProtKB/TrEMBL;Acc:H9GYF5]
LOC101470595	LOC101470595	transmembrane protein 178A%2C transcript variant X1	NC_036785.1	38842023	38854670	TF331307	TMEM178A	transmembrane protein 178A [Source:HGNC Symbol;Acc:28517]	transmembrane protein 178 [Source:ZFIN;Acc:ZDB-GENE-060929-756]
LOC101470304	LOC101470304	heme-binding protein 1	NC_036785.1	38865597	38870245	TF328887	HEBP1	heme binding protein 1 [Source:HGNC Symbol;Acc:17176]	heme-binding protein soul4 [Source:ZFIN;Acc:ZDB-GENE-110718-1]
LOC101474207	LOC101474207	eukaryotic initiation factor 4A-III	NC_036785.1	38871901	38881037	TF300466	EIF4A3	eukaryotic translation initiation factor 4A3 [Source:HGNC Symbol;Acc:18683]	eukaryotic translation initiation factor 4A, isoform 3 [Source:ZFIN;Acc:ZDB-GENE-040426-915]
LOC101469646	LOC101469646	serum response factor	NC_036785.1	38887569	38891490	TF318482	SRF	serum response factor (c-fos serum response element-binding transcription factor) [Source:HGNC Symbol;Acc:11291]	serum response factor [Source:ZFIN;Acc:ZDB-GENE-990714-29]
LOC101469928	LOC101469928	opsin-5	NC_036785.1	38891609	38895016	TF324998	OPN5	opsin 5 [Source:HGNC Symbol;Acc:19992]	zgc:158340 [Source:ZFIN;Acc:ZDB-GENE-061201-30]
LOC101469375	LOC101469375	wiskott-Aldrich syndrome protein family member 3	NC_036785.1	38895675	38905334	TF315031	WASF3	WAS protein family, member 3 [Source:HGNC Symbol;Acc:12734]	si:ch73-362m14.4 [Source:ZFIN;Acc:ZDB-GENE-120215-30]
LOC101468875	LOC101468875	protein CXorf40A	NC_036785.1	38907663	38911131	TF332845	CXorf40A	chromosome X open reading frame 40A [Source:HGNC Symbol;Acc:28089]	chromosome X open reading frame 40B [Source:HGNC Symbol;Acc:17402]
LOC112434988	LOC112434988	putative bifunctional UDP-N-acetylglucosamine transferase and deubiquitinase ALG13	NC_036785.1	38920736	38935078	TF332789	ALG13	asparagine-linked glycosylation 13 homolog (S. cerevisiae) [Source:HGNC Symbol;Acc:30881]	NA
LOC101473611	aars2	alanyl-tRNA synthetase 2%2C mitochondrial%2C transcript variant X1	NC_036785.1	38935312	38952728	TF300737	AARS2	alanyl-tRNA synthetase 2, mitochondrial [Source:HGNC Symbol;Acc:21022]	alanyl-tRNA synthetase 2, mitochondrial (putative) [Source:ZFIN;Acc:ZDB-GENE-041008-213]
LOC105940472	LOC105940472	calpain-1 catalytic subunit-like	NC_036785.1	38952807	38961251	TF314748	CAPN8	calpain 8 [Source:HGNC Symbol;Acc:1485]	calpain 8 [Source:ZFIN;Acc:ZDB-GENE-050522-279]
LOC101468676	LOC101468676	calpain-1 catalytic subunit	NC_036785.1	38961846	38987345	NA	NA	NA	NA
LOC101468385	LOC101468385	calpain-2 catalytic subunit	NC_036785.1	38988384	39000768	TF314748	CAPN2	calpain 2, (m/II) large subunit [Source:HGNC Symbol;Acc:1479]	calpain 2, (m/II) large subunit a [Source:ZFIN;Acc:ZDB-GENE-050320-69]
LOC101467885	LOC101467885	calpain-1 catalytic subunit	NC_036785.1	39001460	39030201	TF314748	CAPN11	calpain 11 [Source:HGNC Symbol;Acc:1478]	si:dkeyp-101g1.3 [Source:ZFIN;Acc:ZDB-GENE-091113-20]
LOC112434964	LOC112434964	uncharacterized LOC112434964	NC_036785.1	39053191	39056721	NA	NA	NA	NA
LOC112434989	LOC112434989	echinoderm microtubule-associated protein-like 6	NC_036785.1	39060626	39064452	TF317832	EML6	echinoderm microtubule associated protein like 6 [Source:HGNC Symbol;Acc:35412]	echinoderm microtubule associated protein like 6 [Source:HGNC Symbol;Acc:35412]
LOC112434961	LOC112434961	uncharacterized LOC112434961%2C transcript variant X1	NC_036785.1	39083995	39088033	TF335156	NA	NA	si:dkey-11d20.1 [Source:ZFIN;Acc:ZDB-GENE-070705-291]
LOC112434959	LOC112434959		NC_036785.1	39106158	39119117	NA	NA	NA	NA
LOC112434958	LOC112434958		NC_036785.1	39119857	39130559	NA	NA	NA	NA
LOC112434962	LOC112434962	replication stress response regulator SDE2-like	NC_036785.1	39132090	39139174	TF314323	SDE2	SDE2 telomere maintenance homolog (S. pombe) [Source:HGNC Symbol;Acc:26643]	SDE2 telomere maintenance homolog (S. pombe) [Source:HGNC Symbol;Acc:26643]	None	NANoHomolog
LOC112434957	LOC112434957		NC_036785.1	39139179	39147455	NA	NA	NA	NA
LOC101467085	LOC101467085	spectrin beta chain%2C non-erythrocytic 1%2C transcript variant X2	NC_036785.1	39188849	39227852	TF313446	SPTBN1	spectrin, beta, non-erythrocytic 1 [Source:HGNC Symbol;Acc:11275]	spectrin, beta, non-erythrocytic 1 [Source:HGNC Symbol;Acc:11275]
LOC101472430	dzank1	double zinc ribbon and ankyrin repeat domains 1%2C transcript variant X4	NC_036785.1	39232587	39246789	TF351270	DZANK1	double zinc ribbon and ankyrin repeat domains 1 [Source:HGNC Symbol;Acc:15858]	double zinc ribbon and ankyrin repeat domains 1 [Source:ZFIN;Acc:ZDB-GENE-051113-296]
LOC112429715	LOC112429715	protein CXorf40A-like	NC_036785.1	39464566	39467974	TF332845	CXorf40A	chromosome X open reading frame 40A [Source:HGNC Symbol;Acc:28089]	chromosome X open reading frame 40B [Source:HGNC Symbol;Acc:17402]
LOC112435025	LOC112435025		NC_036785.1	39470912	39479576	NA	NA	NA	NA
LOC112434990	LOC112434990	opsin-5-like	NC_036785.1	39480279	39483514	TF324998	OPN5	opsin 5 [Source:HGNC Symbol;Acc:19992]	zgc:158340 [Source:ZFIN;Acc:ZDB-GENE-061201-30]
LOC112435043	LOC112435043		NC_036785.1	39483201	39487129	NA	NA	NA	NA
LOC112429996	LOC112429996	eukaryotic initiation factor 4A-III	NC_036785.1	39493665	39502634	TF300466	EIF4A3	eukaryotic translation initiation factor 4A3 [Source:HGNC Symbol;Acc:18683]	eukaryotic translation initiation factor 4A, isoform 3 [Source:ZFIN;Acc:ZDB-GENE-040426-915]
LOC112435006	LOC112435006	heme-binding protein 1-like	NC_036785.1	39504353	39508375	TF328887	HEBP1	heme binding protein 1 [Source:HGNC Symbol;Acc:17176]	heme-binding protein soul4 [Source:ZFIN;Acc:ZDB-GENE-110718-1]
LOC112435008	LOC112435008	transmembrane protein 178A%2C transcript variant X1	NC_036785.1	39520051	39532403	TF331307	TMEM178A	transmembrane protein 178A [Source:HGNC Symbol;Acc:28517]	transmembrane protein 178 [Source:ZFIN;Acc:ZDB-GENE-060929-756]
LOC101471853	sos1	SOS Ras/Rac guanine nucleotide exchange factor 1	NC_036785.1	39543017	39585430	TF317296	SOS1	son of sevenless homolog 1 (Drosophila) [Source:HGNC Symbol;Acc:11187]	son of sevenless homolog 1 (Drosophila) [Source:ZFIN;Acc:ZDB-GENE-070209-128]
LOC101487749	LOC101487749	reticulon-3-B%2C transcript variant X2	NC_036785.1	39587778	39598057	TF105431	RTN3	reticulon 3 [Source:HGNC Symbol;Acc:10469]	reticulon 3 [Source:ZFIN;Acc:ZDB-GENE-030710-5]
LOC101465362	LOC101465362	acylphosphatase-2	NC_036785.1	39598154	39599714	TF300288	ACYP2	acylphosphatase 2, muscle type [Source:HGNC Symbol;Acc:180]	NA
LOC101486976	LOC101486976	signal-induced proliferation-associated 1-like protein 2%2C transcript variant X1	NC_036785.1	39600154	39639900	TF318626	SIPA1L2	signal-induced proliferation-associated 1 like 2 [Source:HGNC Symbol;Acc:23800]	signal-induced proliferation-associated 1 like 2 [Source:HGNC Symbol;Acc:23800]
LOC101471560	LOC101471560	equilibrative nucleoside transporter 1%2C transcript variant X1	NC_036785.1	39640126	39675745	TF313950	SLC29A1	solute carrier family 29 (nucleoside transporters), member 1 [Source:HGNC Symbol;Acc:11003]	solute carrier family 29 (nucleoside transporters), member 1 [Source:HGNC Symbol;Acc:11003]
LOC112435024	LOC112435024	coiled-coil domain-containing protein 151-like	NC_036785.1	39701666	39723881	TF324955	CCDC151	coiled-coil domain containing 151 [Source:HGNC Symbol;Acc:28303]	coiled-coil domain containing 151 [Source:ZFIN;Acc:ZDB-GENE-061013-787]
LOC106675920	LOC106675920	coiled-coil domain-containing protein 151-like	NC_036785.1	39723888	39728997	TF324955	CCDC151	coiled-coil domain containing 151 [Source:HGNC Symbol;Acc:28303]	coiled-coil domain containing 151 [Source:ZFIN;Acc:ZDB-GENE-061013-787]
LOC101464383	LOC101464383	cyclic nucleotide-gated cation channel beta-1	NC_036786.1	14346	39388	TF318250	CNGB1	cyclic nucleotide gated channel beta 1 [Source:HGNC Symbol;Acc:2151]	cyclic nucleotide gated channel beta 1 [Source:HGNC Symbol;Acc:2151]
LOC101481712	LOC101481712	cytochrome P450 2F2	NC_036786.1	186948	208194	TF352043	CYP2J2	cytochrome P450, family 2, subfamily J, polypeptide 2 [Source:HGNC Symbol;Acc:2634]	cytochrome P450, family 2, subfamily X, polypeptide 9 [Source:ZFIN;Acc:ZDB-GENE-061027-109]
LOC101481994	LOC101481994	cytochrome P450 2J6	NC_036786.1	210127	216188	TF352043	CYP2J2	cytochrome P450, family 2, subfamily J, polypeptide 2 [Source:HGNC Symbol;Acc:2634]	cytochrome P450, family 2, subfamily X, polypeptide 9 [Source:ZFIN;Acc:ZDB-GENE-061027-109]
LOC101464957	LOC101464957		NC_036786.1	291116	300683	NA	NA	NA	NA
LOC101483158	LOC101483158	guanine nucleotide-binding protein G(o) subunit alpha%2C transcript variant X3	NC_036786.1	361829	472196	TF300673	GNAO1	guanine nucleotide binding protein (G protein), alpha activating activity polypeptide O [Source:HGNC Symbol;Acc:4389]	guanine nucleotide binding protein (G protein), alpha activating activity polypeptide O, a [Source:ZFIN;Acc:ZDB-GENE-040426-1757]
LOC101487652	siah1	siah E3 ubiquitin protein ligase 1%2C transcript variant X1	NC_036786.1	535513	561367	TF312976	SIAH1	siah E3 ubiquitin protein ligase 1 [Source:HGNC Symbol;Acc:10857]	seven in absentia homolog 1 (Drosophila) [Source:ZFIN;Acc:ZDB-GENE-010319-31]
LOC112435156	LOC112435156	uncharacterized LOC112435156	NC_036786.1	565153	567521	NA	NA	NA	NA
LOC101465464	n4bp1	NEDD4 binding protein 1	NC_036786.1	577127	606016	TF315783	N4BP1	NEDD4 binding protein 1 [Source:HGNC Symbol;Acc:29850]	nedd4 binding protein 1 [Source:ZFIN;Acc:ZDB-GENE-030131-5538]
LOC101464104	cbln1	cerebellin 1 precursor	NC_036786.1	1034454	1059325	TF329591	CBLN1	cerebellin 1 precursor [Source:HGNC Symbol;Acc:1543]	cerebellin 1 precursor [Source:ZFIN;Acc:ZDB-GENE-040718-226]
LOC101463799	LOC101463799	transmembrane protein 189	NC_036786.1	1144297	1205329	TF106147	TMEM189	transmembrane protein 189 [Source:HGNC Symbol;Acc:16735]	si:ch211-212o1.2 [Source:ZFIN;Acc:ZDB-GENE-041111-310]
LOC101487905	znf423	zinc finger protein 423%2C transcript variant X1	NC_036786.1	1209051	1339064	TF331504	ZNF423	zinc finger protein 423 [Source:HGNC Symbol;Acc:16762]	zinc finger protein 423 [Source:HGNC Symbol;Acc:16762]
LOC101487431	LOC101487431	nuclear receptor coactivator 5%2C transcript variant X1	NC_036786.1	1356446	1368845	TF343378	NA	NA	NA
LOC101486947	cnot1	CCR4-NOT transcription complex subunit 1%2C transcript variant X1	NC_036786.1	1373377	1404206	TF105630	CNOT1	CCR4-NOT transcription complex, subunit 1 [Source:HGNC Symbol;Acc:7877]	CCR4-NOT transcription complex, subunit 1 [Source:ZFIN;Acc:ZDB-GENE-040915-1]
LOC101485143	b3gnt9	UDP-GlcNAc:betaGal beta-1%2C3-N-acetylglucosaminyltransferase 9%2C transcript variant X2	NC_036786.1	1468046	1474774	TF318639	B3GNT9	UDP-GlcNAc:betaGal beta-1,3-N-acetylglucosaminyltransferase 9 [Source:HGNC Symbol;Acc:28714]	UDP-GlcNAc:betaGal beta-1,3-N-acetylglucosaminyltransferase 9 [Source:ZFIN;Acc:ZDB-GENE-060503-611]
LOC101484474	lg7h16orf70	linkage group 7 C16orf70 homolog%2C transcript variant X1	NC_036786.1	1478280	1491186	TF313669	C16orf70	chromosome 16 open reading frame 70 [Source:HGNC Symbol;Acc:29564]	chromosome 16 open reading frame 70 [Source:HGNC Symbol;Acc:29564]
LOC101483636	cbfb	core-binding factor beta subunit%2C transcript variant X3	NC_036786.1	1510992	1542038	TF314675	CBFB	core-binding factor, beta subunit [Source:HGNC Symbol;Acc:1539]	core-binding factor, beta subunit [Source:ZFIN;Acc:ZDB-GENE-980526-440]
LOC101474184	slc45a3	solute carrier family 45 member 3%2C transcript variant X4	NC_036786.1	1649591	1694713	TF325412	SLC45A3	solute carrier family 45, member 3 [Source:HGNC Symbol;Acc:8642]	zgc:77158 [Source:ZFIN;Acc:ZDB-GENE-040426-1799]
LOC101473089	LOC101473089	probable fructose-2%2C6-bisphosphatase TIGAR A%2C transcript variant X1	NC_036786.1	1706757	1711600	TF329053	C12orf5	chromosome 12 open reading frame 5 [Source:HGNC Symbol;Acc:1185]	chromosome 12 open reading frame 5 [Source:HGNC Symbol;Acc:1185]
LOC101472403	LOC101472403	G1/S-specific cyclin-D2%2C transcript variant X2	NC_036786.1	1716574	1737182	TF101004	CCND2	cyclin D2 [Source:HGNC Symbol;Acc:1583]	cyclin D2, a [Source:ZFIN;Acc:ZDB-GENE-070424-30]
LOC101472899	LOC101472899	uncharacterized LOC101472899	NC_036786.1	1765644	1878231	NA	NA	NA	NA
LOC101486372	cdh13	cadherin 13%2C transcript variant X1	NC_036786.1	1998233	2404883	TF316817	CDH15	cadherin 15, type 1, M-cadherin (myotubule) [Source:HGNC Symbol;Acc:1754]	cadherin 13, H-cadherin (heart) [Source:ZFIN;Acc:ZDB-GENE-060503-286]
LOC101467749	mlycd	malonyl-CoA decarboxylase	NC_036786.1	2501896	2523032	TF312959	MLYCD	malonyl-CoA decarboxylase [Source:HGNC Symbol;Acc:7150]	malonyl-CoA decarboxylase [Source:ZFIN;Acc:ZDB-GENE-070410-120]
LOC101468046	LOC101468046	DNA topoisomerase I%2C mitochondrial%2C transcript variant X2	NC_036786.1	2528748	2557698	TF105281	TOP1	topoisomerase (DNA) I [Source:HGNC Symbol;Acc:11986]	zgc:173742 [Source:ZFIN;Acc:ZDB-GENE-030131-6489]
LOC101469244	LOC101469244	PQ-loop repeat-containing protein 1%2C transcript variant X1	NC_036786.1	2561843	2621092	TF313072	PQLC1	PQ loop repeat containing 1 [Source:HGNC Symbol;Acc:26188]	si:dkey-246g23.2 [Source:ZFIN;Acc:ZDB-GENE-050419-100]
LOC101469702	kcng4	potassium voltage-gated channel modifier subfamily G member 4%2C transcript variant X2	NC_036786.1	2662918	2685771	TF313103	KCNG4	potassium voltage-gated channel, subfamily G, member 4 [Source:HGNC Symbol;Acc:19697]	potassium voltage-gated channel, subfamily G, member 4 [Source:ZFIN;Acc:ZDB-GENE-050419-11]
LOC101470968	LOC101470968	dual specificity tyrosine-phosphorylation-regulated kinase 4%2C transcript variant X4	NC_036786.1	2735027	2762656	TF314624	DYRK4	dual-specificity tyrosine-(Y)-phosphorylation regulated kinase 4 [Source:HGNC Symbol;Acc:3095]	dual-specificity tyrosine-(Y)-phosphorylation regulated kinase 4 [Source:ZFIN;Acc:ZDB-GENE-091015-3]
LOC101477151	fgd4	FYVE%2C RhoGEF and PH domain containing 4%2C transcript variant X3	NC_036786.1	3001560	3055387	TF316247	FGD4	FYVE, RhoGEF and PH domain containing 4 [Source:HGNC Symbol;Acc:19125]	FYVE, RhoGEF and PH domain containing 4a [Source:ZFIN;Acc:ZDB-GENE-050420-347]
LOC101478004	bicd1	BICD cargo adaptor 1%2C transcript variant X1	NC_036786.1	3056103	3087265	TF323833	BICD1	bicaudal D homolog 1 (Drosophila) [Source:HGNC Symbol;Acc:1049]	bicaudal D homolog 1a [Source:ZFIN;Acc:ZDB-GENE-081031-9]
LOC101487228	LOC101487228	protein FAM180A	NC_036786.1	3102495	3105740	TF333387	FAM180A	family with sequence similarity 180, member A [Source:HGNC Symbol;Acc:33773]	Uncharacterized protein [Source:UniProtKB/TrEMBL;Acc:E7F1I1]
LOC101479776	LOC101479776	transmembrane and TPR repeat-containing protein 2	NC_036786.1	3161198	3251447	TF328339	TMTC2	transmembrane and tetratricopeptide repeat containing 2 [Source:HGNC Symbol;Acc:25440]	transmembrane and tetratricopeptide repeat containing 2 [Source:HGNC Symbol;Acc:25440]
LOC101481124	LOC101481124	protein arginine N-methyltransferase 8-B	NC_036786.1	3312416	3343481	TF300608	PRMT8	protein arginine methyltransferase 8 [Source:HGNC Symbol;Acc:5188]	Uncharacterized protein [Source:UniProtKB/TrEMBL;Acc:E7F3B5]
LOC101481610	tspan9	tetraspanin 9%2C transcript variant X1	NC_036786.1	3397611	3585089	TF352892	TSPAN9	tetraspanin 9 [Source:HGNC Symbol;Acc:21640]	tetraspanin 9a [Source:ZFIN;Acc:ZDB-GENE-060503-632]
LOC101482493	LOC101482493	tetraspanin-33	NC_036786.1	3588545	3603984	TF313002	TSPAN33	tetraspanin 33 [Source:HGNC Symbol;Acc:28743]	si:ch211-59c24.1 [Source:ZFIN;Acc:ZDB-GENE-060503-607]
LOC101483062	mical3	microtubule associated monooxygenase%2C calponin and LIM domain containing 3%2C transcript variant X1	NC_036786.1	3615233	3692932	TF333408	NA	NA	microtubule associated monoxygenase, calponin and LIM domain containing 3a [Source:ZFIN;Acc:ZDB-GENE-050126-2]
LOC101485411	hipk2	homeodomain interacting protein kinase 2%2C transcript variant X1	NC_036786.1	3731038	3797917	TF105417	HIPK2	homeodomain interacting protein kinase 2 [Source:HGNC Symbol;Acc:14402]	homeodomain interacting protein kinase 2 [Source:ZFIN;Acc:ZDB-GENE-031125-4]
LOC101484118	LOC101484118	SLIT-ROBO Rho GTPase-activating protein 1%2C transcript variant X1	NC_036786.1	3929508	4006319	TF315892	SRGAP1	SLIT-ROBO Rho GTPase activating protein 1 [Source:HGNC Symbol;Acc:17382]	SLIT-ROBO Rho GTPase activating protein 1 [Source:ZFIN;Acc:ZDB-GENE-050420-284]
LOC101479980	LOC101479980	zinc finger protein 516	NC_036786.1	4040849	4054402	TF332241	ZNF536	zinc finger protein 536 [Source:HGNC Symbol;Acc:29025]	zinc finger protein 536 [Source:ZFIN;Acc:ZDB-GENE-030616-624]
LOC101486675	LOC101486675	teashirt homolog 3	NC_036786.1	4082370	4098592	TF328447	TSHZ3	teashirt zinc finger homeobox 3 [Source:HGNC Symbol;Acc:30700]	teashirt zinc finger homeobox 3 [Source:HGNC Symbol;Acc:30700]
LOC101486958	LOC101486958	neural-cadherin	NC_036786.1	4133561	4242536	TF351842	NA	NA	Uncharacterized protein [Source:UniProtKB/TrEMBL;Acc:F1QK15]
LOC101465441	mlc1	megalencephalic leukoencephalopathy with subcortical cysts 1%2C transcript variant X1	NC_036786.1	4311014	4316318	TF333109	MLC1	megalencephalic leukoencephalopathy with subcortical cysts 1 [Source:HGNC Symbol;Acc:17082]	megalencephalic leukoencephalopathy with subcortical cysts 1 [Source:ZFIN;Acc:ZDB-GENE-050419-145]
LOC101466601	LOC101466601	cryptochrome-1%2C transcript variant X1	NC_036786.1	4405112	4420853	TF323191	CRY1	cryptochrome 1 (photolyase-like) [Source:HGNC Symbol;Acc:2384]	cryptochrome 1a [Source:ZFIN;Acc:ZDB-GENE-010426-2]
LOC101467859	LOC101467859	carbohydrate sulfotransferase 1%2C transcript variant X1	NC_036786.1	4473282	4479503	TF342871	CHST1	carbohydrate (keratan sulfate Gal-6) sulfotransferase 1 [Source:HGNC Symbol;Acc:1969]	si:ch73-62b13.1 [Source:ZFIN;Acc:ZDB-GENE-050420-366]
LOC101472907	LOC101472907	oxysterol-binding protein-related protein 5%2C transcript variant X1	NC_036786.1	4743040	4793355	TF312807	OSBPL5	oxysterol binding protein-like 5 [Source:HGNC Symbol;Acc:16392]	oxysterol binding protein-like 5 [Source:ZFIN;Acc:ZDB-GENE-030131-5872]
LOC101480854	LOC101480854	receptor-type tyrosine-protein phosphatase beta%2C transcript variant X2	NC_036786.1	4796213	4855341	TF351926	PTPRJ	protein tyrosine phosphatase, receptor type, J [Source:HGNC Symbol;Acc:9673]	protein tyrosine phosphatase, receptor type, J [Source:HGNC Symbol;Acc:9673]
LOC101469021	mrpl23	mitochondrial ribosomal protein L23	NC_036786.1	5306626	5357167	TF105852	MRPL23	mitochondrial ribosomal protein L23 [Source:HGNC Symbol;Acc:10322]	mitochondrial ribosomal protein L23 [Source:ZFIN;Acc:ZDB-GENE-040625-12]
LOC101471218	spty2d1	SPT2 chromatin protein domain containing 1	NC_036786.1	5447572	5452484	TF350176	SPTY2D1	SPT2, Suppressor of Ty, domain containing 1 (S. cerevisiae) [Source:HGNC Symbol;Acc:26818]	SPT2, Suppressor of Ty, domain containing 1 (S. cerevisiae) [Source:ZFIN;Acc:ZDB-GENE-050522-212]
LOC101471508	tmem86a	transmembrane protein 86A	NC_036786.1	5456203	5465695	TF324663	TMEM86A	transmembrane protein 86A [Source:HGNC Symbol;Acc:26890]	transmembrane protein 86A [Source:ZFIN;Acc:ZDB-GENE-050320-81]
LOC101472376	igsf22	immunoglobulin superfamily member 22	NC_036786.1	5468656	5483994	TF351819	IGSF22	immunoglobulin superfamily, member 22 [Source:HGNC Symbol;Acc:26750]	myosin binding protein C, cardiac [Source:ZFIN;Acc:ZDB-GENE-070112-2362]
LOC101471802	b4galnt4	beta-1%2C4-N-acetyl-galactosaminyltransferase 4	NC_036786.1	5497225	5643862	TF318303	B4GALNT4	beta-1,4-N-acetyl-galactosaminyl transferase 4 [Source:HGNC Symbol;Acc:26315]	Uncharacterized protein [Source:UniProtKB/TrEMBL;Acc:E7F204]
LOC101472078	LOC101472078	serine/threonine-protein kinase BRSK2%2C transcript variant X2	NC_036786.1	5685144	5864137	TF313967	BRSK2	BR serine/threonine kinase 2 [Source:HGNC Symbol;Acc:11405]	Uncharacterized protein [Source:UniProtKB/TrEMBL;Acc:F1QPU5]
LOC101474615	tsg101	tumor susceptibility 101	NC_036786.1	5890843	5897723	TF312917	TSG101	tumor susceptibility gene 101 [Source:HGNC Symbol;Acc:15971]	tumor susceptibility gene 101 [Source:ZFIN;Acc:ZDB-GENE-030217-1]
LOC101477215	ldlrad3	low density lipoprotein receptor class A domain containing 3%2C transcript variant X1	NC_036786.1	6073474	6167611	TF332096	LDLRAD3	low density lipoprotein receptor class A domain containing 3 [Source:HGNC Symbol;Acc:27046]	low density lipoprotein receptor class A domain containing 3 [Source:ZFIN;Acc:ZDB-GENE-030131-1533]
LOC101477881	trim44	tripartite motif containing 44%2C transcript variant X1	NC_036786.1	6193190	6236094	TF333911	TRIM44	tripartite motif containing 44 [Source:HGNC Symbol;Acc:19016]	tripartite motif-containing 44 [Source:ZFIN;Acc:ZDB-GENE-050522-37]
LOC101480138	ehf	ETS homologous factor	NC_036786.1	6396249	6402600	TF318679	EHF	ets homologous factor [Source:HGNC Symbol;Acc:3246]	ets homologous factor [Source:ZFIN;Acc:ZDB-GENE-060312-7]
LOC112435172	LOC112435172	uncharacterized LOC112435172	NC_036786.1	6490160	6490950	NA	NA	NA	NA
LOC101480429	LOC101480429	leucine-rich repeat-containing protein 4C%2C transcript variant X2	NC_036786.1	6711792	6764901	TF324303	LRRC4C	leucine rich repeat containing 4C [Source:HGNC Symbol;Acc:29317]	leucine rich repeat containing 4C [Source:HGNC Symbol;Acc:29317]
LOC101481301	rag2	recombination activating 2	NC_036786.1	7087374	7089877	TF331236	RAG2	recombination activating gene 2 [Source:HGNC Symbol;Acc:9832]	recombination activating gene 2 [Source:ZFIN;Acc:ZDB-GENE-990415-235]
LOC101481579	rag1	recombination activating 1	NC_036786.1	7091132	7098015	TF331926	RAG1	recombination activating gene 1 [Source:HGNC Symbol;Acc:9831]	recombination activating gene 1 [Source:ZFIN;Acc:ZDB-GENE-990415-234]
LOC101481876	LOC101481876	uncharacterized LOC101481876%2C transcript variant X1	NC_036786.1	7110194	7114614	NoHit	NA	NA	NA
LOC101482852	furin	furin%2C paired basic amino acid cleaving enzyme%2C transcript variant X1	NC_036786.1	7123375	7219315	TF314277	FURIN	furin (paired basic amino acid cleaving enzyme) [Source:HGNC Symbol;Acc:8568]	furin (paired basic amino acid cleaving enzyme) b [Source:ZFIN;Acc:ZDB-GENE-040901-2]
LOC101485849	LOC101485849	uncharacterized LOC101485849	NC_036786.1	7301639	7311647	NA	NA	NA	NA
LOC111500840	trnar-ucg	tRNA-Arg	NC_036786.1	7316039	7316111	NA	NA	NA	NA
LOC101464640	LOC101464640	protein BANP	NC_036786.1	7425189	7466465	TF331908	BANP	BTG3 associated nuclear protein [Source:HGNC Symbol;Acc:13450]	BTG3 associated nuclear protein [Source:ZFIN;Acc:ZDB-GENE-050522-54]
LOC101464926	znf469	zinc finger protein 469	NC_036786.1	7472067	7718281	TF334420	NA	NA	si:dkey-154p10.3 [Source:ZFIN;Acc:ZDB-GENE-070912-380]
LOC101465888	kras	KRAS proto-oncogene%2C GTPase%2C transcript variant X3	NC_036786.1	7735223	7747689	TF312796	HRAS	v-Ha-ras Harvey rat sarcoma viral oncogene homolog [Source:HGNC Symbol;Acc:5173]	v-Ki-ras2 Kirsten rat sarcoma viral oncogene homolog [Source:ZFIN;Acc:ZDB-GENE-040808-67]
LOC101467225	plekhg7	pleckstrin homology and RhoGEF domain containing G7%2C transcript variant X2	NC_036786.1	7850457	7864440	TF316247	PLEKHG7	pleckstrin homology domain containing, family G (with RhoGef domain) member 7 [Source:HGNC Symbol;Acc:33829]	pleckstrin homology domain containing, family G (with RhoGef domain) member 7 [Source:ZFIN;Acc:ZDB-GENE-070410-15]
LOC106675357	LOC106675357	uncharacterized LOC106675357	NC_036786.1	8037426	8040876	NoHit	NA	NA	NA
LOC112435190	LOC112435190	uncharacterized LOC112435190	NC_036786.1	8075381	8076145	NA	NA	NA	NA
LOC101480107	polr3b	RNA polymerase III subunit B	NC_036786.1	8137493	8166613	TF103047	POLR3B	polymerase (RNA) III (DNA directed) polypeptide B [Source:HGNC Symbol;Acc:30348]	polymerase (RNA) III (DNA directed) polypeptide B [Source:ZFIN;Acc:ZDB-GENE-030131-2887]
LOC101466453	armc10	armadillo repeat containing 10	NC_036786.1	8528538	8532665	TF335652	ARMC10	armadillo repeat containing 10 [Source:HGNC Symbol;Acc:21706]	armadillo repeat containing 10 [Source:HGNC Symbol;Acc:21706]
LOC101484138	LOC101484138	transcription factor Maf%2C transcript variant X1	NC_036786.1	8941143	8986368	TF325689	MAF	v-maf musculoaponeurotic fibrosarcoma oncogene homolog (avian) [Source:HGNC Symbol;Acc:6776]	v-maf musculoaponeurotic fibrosarcoma oncogene homolog (avian) [Source:HGNC Symbol;Acc:6776]
LOC112435122	LOC112435122	SH3 and multiple ankyrin repeat domains protein 3-like%2C transcript variant X1	NC_036786.1	9166434	9279588	TF324593	SHANK1	SH3 and multiple ankyrin repeat domains 1 [Source:HGNC Symbol;Acc:15474]	SH3 and multiple ankyrin repeat domains 3b [Source:ZFIN;Acc:ZDB-GENE-041210-74]
LOC101471092	LOC101471092	leptin-like	NC_036786.1	9370036	9370663	TF353488	NA	NA	leptin b [Source:ZFIN;Acc:ZDB-GENE-041210-183]
LOC101477569	rbm28	RNA binding motif protein 28	NC_036786.1	9371578	9384456	TF312798	RBM28	RNA binding motif protein 28 [Source:HGNC Symbol;Acc:21863]	RNA binding motif protein 28 [Source:ZFIN;Acc:ZDB-GENE-040426-960]
LOC101476437	LOC101476437	uncharacterized LOC101476437	NC_036786.1	9587873	9592739	TF318526	NA	NA	NA
LOC101470820	LOC101470820	leucine-rich repeat-containing protein 4	NC_036786.1	9826338	9833273	TF324303	LRRC4	leucine rich repeat containing 4 [Source:HGNC Symbol;Acc:15586]	leucine rich repeat containing 4.2 [Source:ZFIN;Acc:ZDB-GENE-030131-7997]
LOC101469941	sema3a	semaphorin 3A	NC_036786.1	10087946	10111265	TF352628	SEMA3E	sema domain, immunoglobulin domain (Ig), short basic domain, secreted, (semaphorin) 3E [Source:HGNC Symbol;Acc:10727]	sema domain, immunoglobulin domain (Ig), short basic domain, secreted, (semaphorin) 3bl [Source:ZFIN;Acc:ZDB-GENE-030131-2956]
LOC101469659	sema3d	semaphorin 3D	NC_036786.1	10152377	10182456	TF352628	SEMA3E	sema domain, immunoglobulin domain (Ig), short basic domain, secreted, (semaphorin) 3E [Source:HGNC Symbol;Acc:10727]	sema domain, immunoglobulin domain (Ig), short basic domain, secreted, (semaphorin) 3bl [Source:ZFIN;Acc:ZDB-GENE-030131-2956]
LOC101468980	LOC101468980	metabotropic glutamate receptor 3%2C transcript variant X2	NC_036786.1	10236069	10280294	TF313240	GRM3	glutamate receptor, metabotropic 3 [Source:HGNC Symbol;Acc:4595]	glutamate receptor, metabotropic 3 [Source:ZFIN;Acc:ZDB-GENE-061009-13]
LOC101466729	LOC101466729	calumenin-B	NC_036786.1	10375835	10380041	TF314849	CALU	calumenin [Source:HGNC Symbol;Acc:1458]	calumenin b [Source:ZFIN;Acc:ZDB-GENE-040426-1251]
LOC101464791	ppp6r2	protein phosphatase 6 regulatory subunit 2%2C transcript variant X1	NC_036786.1	10478384	10495789	TF313227	PPP6R2	protein phosphatase 6, regulatory subunit 2 [Source:HGNC Symbol;Acc:19253]	protein phosphatase 6, regulatory subunit 2b [Source:ZFIN;Acc:ZDB-GENE-070705-441]
LOC101464506	LOC101464506	MOB kinase activator 2	NC_036786.1	10496479	10500557	TF300789	MOB1B	MOB kinase activator 1B [Source:HGNC Symbol;Acc:29801]	si:dkey-266m15.5 [Source:ZFIN;Acc:ZDB-GENE-070705-442]
LOC101463643	LOC101463643	ADM2%2C transcript variant X1	NC_036786.1	10513174	10520420	TF338591	ADM2	adrenomedullin 2 [Source:HGNC Symbol;Acc:28898]	adrenomedullin 2b [Source:ZFIN;Acc:ZDB-GENE-081104-279]
LOC101485737	LOC101485737	beta-1%2C4-N-acetylgalactosaminyltransferase 3	NC_036786.1	10565365	10578872	TF318303	B4GALNT3	beta-1,4-N-acetyl-galactosaminyl transferase 3 [Source:HGNC Symbol;Acc:24137]	beta-1,4-N-acetyl-galactosaminyl transferase 3b [Source:ZFIN;Acc:ZDB-GENE-030131-8615]
LOC112435202	LOC112435202	uncharacterized LOC112435202	NC_036786.1	10591711	10601297	NA	NA	NA	NA
LOC101481835	LOC101481835	CD9 antigen%2C transcript variant X1	NC_036786.1	10777687	10784176	TF352895	CD9	CD9 molecule [Source:HGNC Symbol;Acc:1709]	CD9 antigen (p24) a [Source:ZFIN;Acc:ZDB-GENE-030131-1175]
LOC101481554	vwf	von Willebrand factor	NC_036786.1	10786219	10807993	TF330609	OTOGL	otogelin-like [Source:HGNC Symbol;Acc:26901]	otogelin [Source:HGNC Symbol;Acc:8516]
LOC101479543	igf1r	insulin like growth factor 1 receptor	NC_036786.1	10854091	10930059	TF351636	IGF1R	insulin-like growth factor 1 receptor [Source:HGNC Symbol;Acc:5465]	insulin-like growth factor 1a receptor [Source:ZFIN;Acc:ZDB-GENE-020503-1]
LOC101477103	mef2a	myocyte enhancer factor 2A%2C transcript variant X4	NC_036786.1	10985358	11051952	TF314067	MEF2A	myocyte enhancer factor 2A [Source:HGNC Symbol;Acc:6993]	myocyte enhancer factor 2aa [Source:ZFIN;Acc:ZDB-GENE-990415-163]
LOC101476817	LOC101476817	multiple C2 and transmembrane domain-containing protein 2	NC_036786.1	11059876	11093372	TF323373	MCTP2	multiple C2 domains, transmembrane 2 [Source:HGNC Symbol;Acc:25636]	multiple C2 domains, transmembrane 2a [Source:ZFIN;Acc:ZDB-GENE-040724-63]
LOC101476329	nr2f2	nuclear receptor subfamily 2 group F member 2%2C transcript variant X1	NC_036786.1	11277777	11288375	TF352097	NR2F2	nuclear receptor subfamily 2, group F, member 2 [Source:HGNC Symbol;Acc:7976]	nuclear receptor subfamily 2, group F, member 2 [Source:ZFIN;Acc:ZDB-GENE-990415-252]
LOC105940943	LOC105940943	uncharacterized LOC105940943	NC_036786.1	11287041	11292973	NA	NA	NA	NA
LOC101475751	LOC101475751	lysM and putative peptidoglycan-binding domain-containing protein 4%2C transcript variant X3	NC_036786.1	11484311	11488287	TF326271	LYSMD4	LysM, putative peptidoglycan-binding, domain containing 4 [Source:HGNC Symbol;Acc:26571]	LysM, putative peptidoglycan-binding, domain containing 4 [Source:ZFIN;Acc:ZDB-GENE-040426-1895]
LOC101474586	chd2	chromodomain helicase DNA binding protein 2%2C transcript variant X1	NC_036786.1	11613511	11641438	TF313461	CHD2	chromodomain helicase DNA binding protein 2 [Source:HGNC Symbol;Acc:1917]	chromodomain helicase DNA binding protein 2 [Source:ZFIN;Acc:ZDB-GENE-050419-256]
LOC101473824	st8sia2	ST8 alpha-N-acetyl-neuraminide alpha-2%2C8-sialyltransferase 2	NC_036786.1	11650017	11665815	TF352820	ST8SIA2	ST8 alpha-N-acetyl-neuraminide alpha-2,8-sialyltransferase 2 [Source:HGNC Symbol;Acc:10870]	ST8 alpha-N-acetyl-neuraminide alpha-2,8-sialyltransferase 2 [Source:ZFIN;Acc:ZDB-GENE-020919-4]
LOC101471002	LOC101471002	ras and EF-hand domain-containing protein%2C transcript variant X1	NC_036786.1	11867309	11877884	TF313106	RASEF	RAS and EF-hand domain containing [Source:HGNC Symbol;Acc:26464]	zgc:162879 [Source:ZFIN;Acc:ZDB-GENE-070424-92]
LOC101470126	LOC101470126	semaphorin-4B%2C transcript variant X1	NC_036786.1	11879086	11961608	TF352903	SEMA4B	sema domain, immunoglobulin domain (Ig), transmembrane domain (TM) and short cytoplasmic domain, (semaphorin) 4B [Source:HGNC Symbol;Acc:10730]	sema domain, immunoglobulin domain (Ig), transmembrane domain (TM) and short cytoplasmic domain, (semaphorin) 4Ba [Source:ZFIN;Acc:ZDB-GENE-070705-31]
LOC101466627	LOC101466627	FERM domain-containing protein 5%2C transcript variant X1	NC_036786.1	12128361	12197112	TF343477	FRMD5	FERM domain containing 5 [Source:HGNC Symbol;Acc:28214]	FERM domain containing 5 [Source:HGNC Symbol;Acc:28214]
LOC101482237	rora	RAR related orphan receptor A%2C transcript variant X1	NC_036786.1	12579858	12767991	TF319910	RORA	RAR-related orphan receptor A [Source:HGNC Symbol;Acc:10258]	RAR-related orphan receptor A, paralog a [Source:ZFIN;Acc:ZDB-GENE-060306-2]
LOC101480007	LOC101480007	proprotein convertase subtilisin/kexin type 5%2C transcript variant X1	NC_036786.1	12867386	12882182	TF343510	NA	NA	Uncharacterized protein [Source:UniProtKB/TrEMBL;Acc:E7F7S3]
LOC101479247	LOC101479247	uncharacterized LOC101479247	NC_036786.1	12954121	12954954	NA	NA	NA	NA
LOC101474217	fbxl22	F-box and leucine rich repeat protein 22	NC_036786.1	13118075	13122849	TF332457	FBXL22	F-box and leucine-rich repeat protein 22 [Source:HGNC Symbol;Acc:27537]	F-box and leucine-rich repeat protein 22 [Source:ZFIN;Acc:ZDB-GENE-050227-1]
LOC101465859	megf11	multiple EGF like domains 11%2C transcript variant X1	NC_036786.1	13436299	13517412	TF332598	MEGF11	multiple EGF-like-domains 11 [Source:HGNC Symbol;Acc:29635]	multiple EGF-like-domains 11 [Source:ZFIN;Acc:ZDB-GENE-060503-252]
LOC101486989	smad6	SMAD family member 6	NC_036786.1	13620588	13643654	TF314923	SMAD6	SMAD family member 6 [Source:HGNC Symbol;Acc:6772]	SMAD family member 6b [Source:ZFIN;Acc:ZDB-GENE-050419-198]
LOC101484694	lg7h15orf61	linkage group 7 C15orf61 homolog%2C transcript variant X1	NC_036786.1	13716149	13718320	TF332748	C15orf61	chromosome 15 open reading frame 61 [Source:HGNC Symbol;Acc:34453]	chromosome 15 open reading frame 61 [Source:HGNC Symbol;Acc:34453]	None	NANoHomolog
LOC101484245	LOC101484245	SKI family transcriptional corepressor 1 homolog-B%2C transcript variant X1	NC_036786.1	13753661	13760673	TF324133	SKOR1	SKI family transcriptional corepressor 1 [Source:HGNC Symbol;Acc:21326]	SKI family transcriptional corepressor 1a [Source:ZFIN;Acc:ZDB-GENE-080722-5]
LOC101483484	LOC101483484	mortality factor 4-like protein 1%2C transcript variant X1	NC_036786.1	13776322	13784303	TF323400	MORF4L1	mortality factor 4 like 1 [Source:HGNC Symbol;Acc:16989]	mortality factor 4 like 1 [Source:ZFIN;Acc:ZDB-GENE-040718-348]
LOC101483199	LOC101483199	transducin-like enhancer protein 3-B%2C transcript variant X3	NC_036786.1	13826037	13845090	TF314167	TLE3	transducin-like enhancer of split 3 (E(sp1) homolog, Drosophila) [Source:HGNC Symbol;Acc:11839]	groucho 2 [Source:ZFIN;Acc:ZDB-GENE-990415-86]
LOC101482530	LOC101482530	kinesin-like protein KIF23%2C transcript variant X1	NC_036786.1	13916055	13924061	TF105232	KIF23	kinesin family member 23 [Source:HGNC Symbol;Acc:6392]	kinesin family member 23 [Source:ZFIN;Acc:ZDB-GENE-991019-4]
LOC101481833	LOC101481833	kinesin-like protein KIF23%2C transcript variant X1	NC_036786.1	13927752	13940039	TF105232	KIF23	kinesin family member 23 [Source:HGNC Symbol;Acc:6392]	kinesin family member 23 [Source:ZFIN;Acc:ZDB-GENE-991019-4]
LOC101474491	eps8l2	EPS8 like 2%2C transcript variant X3	NC_036786.1	14036169	14066575	TF313069	EPS8L2	EPS8-like 2 [Source:HGNC Symbol;Acc:21296]	EPS8-like 2 [Source:HGNC Symbol;Acc:21296]
LOC101473241	LOC101473241	fatty acid desaturase 2%2C transcript variant X1	NC_036786.1	14092209	14097863	TF313604	FADS2	fatty acid desaturase 2 [Source:HGNC Symbol;Acc:3575]	fatty acid desaturase 2 [Source:ZFIN;Acc:ZDB-GENE-011212-1]
LOC101470916	LOC101470916	synaptotagmin-7%2C transcript variant X1	NC_036786.1	14127113	14220596	TF315600	SYT7	synaptotagmin VII [Source:HGNC Symbol;Acc:11514]	synaptotagmin VII [Source:HGNC Symbol;Acc:11514]
LOC101470317	LOC101470317	p53-induced death domain-containing protein 1	NC_036786.1	14242685	14257430	TF331183	PIDD	p53-induced death domain protein [Source:HGNC Symbol;Acc:16491]	p53-induced death domain protein [Source:ZFIN;Acc:ZDB-GENE-081104-353]
LOC101470022	LOC101470022	patatin-like phospholipase domain-containing protein 2	NC_036786.1	14259704	14266794	TF314272	PNPLA2	patatin-like phospholipase domain containing 2 [Source:HGNC Symbol;Acc:30802]	patatin-like phospholipase domain containing 2 [Source:HGNC Symbol;Acc:30802]
LOC101479345	LOC101479345	mucin-2	NC_036786.1	14387902	14409431	TF336561	NA	NA	mucin 5AC, oligomeric mucus/gel-forming [Source:HGNC Symbol;Acc:7515]
LOC101464409	LOC101464409	anoctamin-9	NC_036786.1	14592111	14613018	TF314265	ANO9	anoctamin 9 [Source:HGNC Symbol;Acc:20679]	anoctamin 9a [Source:ZFIN;Acc:ZDB-GENE-071004-46]
LOC101467696	ano3	anoctamin 3%2C transcript variant X1	NC_036786.1	14701291	14745524	TF314265	ANO3	anoctamin 3 [Source:HGNC Symbol;Acc:14004]	anoctamin 3 [Source:ZFIN;Acc:ZDB-GENE-111031-3]
LOC101470604	clpx	caseinolytic mitochondrial matrix peptidase chaperone subunit%2C transcript variant X1	NC_036786.1	14784745	14794842	TF312884	CLPX	ClpX caseinolytic peptidase X homolog (E. coli) [Source:HGNC Symbol;Acc:2088]	ClpX caseinolytic peptidase X homolog (E. coli) [Source:ZFIN;Acc:ZDB-GENE-040912-143]
LOC101479582	caprin1	cell cycle associated protein 1%2C transcript variant X1	NC_036786.1	15109508	15123283	TF329471	CAPRIN1	cell cycle associated protein 1 [Source:HGNC Symbol;Acc:6743]	cell cycle associated protein 1b [Source:ZFIN;Acc:ZDB-GENE-040426-2020]
LOC101483259	lmo2	LIM domain only 2	NC_036786.1	15130247	15134337	TF351071	LMO2	LIM domain only 2 (rhombotin-like 1) [Source:HGNC Symbol;Acc:6642]	LIM domain only 2 (rhombotin-like 1) [Source:ZFIN;Acc:ZDB-GENE-980526-419]
LOC101483540	alx4	ALX homeobox 4	NC_036786.1	15158957	15182933	TF350743	ALX4	ALX homeobox 4 [Source:HGNC Symbol;Acc:450]	aristaless-like homeobox 4a [Source:ZFIN;Acc:ZDB-GENE-070712-3]
LOC101484104	cd82	CD82 molecule	NC_036786.1	15283120	15306857	TF352892	CD82	CD82 molecule [Source:HGNC Symbol;Acc:6210]	CD82 antigen, b [Source:ZFIN;Acc:ZDB-GENE-030131-2857]
LOC101485328	LOC101485328	LHFPL tetraspan subfamily member 3 protein	NC_036786.1	15386655	15411644	TF321143	LHFPL3	lipoma HMGIC fusion partner-like 3 [Source:HGNC Symbol;Acc:6589]	lipoma HMGIC fusion partner-like 3 [Source:ZFIN;Acc:ZDB-GENE-040801-180]
LOC101463790	LOC101463790	pleckstrin homology domain-containing family A member 5%2C transcript variant X3	NC_036786.1	15613833	15709860	TF329090	PLEKHA5	pleckstrin homology domain containing, family A member 5 [Source:HGNC Symbol;Acc:30036]	pleckstrin homology domain containing, family A member 5 [Source:ZFIN;Acc:ZDB-GENE-041210-25]
LOC101464281	LOC101464281	zinc finger protein aebp2%2C transcript variant X1	NC_036786.1	15711068	15736194	TF328864	AEBP2	AE binding protein 2 [Source:HGNC Symbol;Acc:24051]	NA
LOC101464760	LOC101464760	cGMP-inhibited 3'%2C5'-cyclic phosphodiesterase A%2C transcript variant X1	NC_036786.1	15807491	15917956	TF329631	PDE3A	phosphodiesterase 3A, cGMP-inhibited [Source:HGNC Symbol;Acc:8778]	phosphodiesterase 3A, cGMP-inhibited [Source:ZFIN;Acc:ZDB-GENE-041210-23]
LOC101466401	LOC101466401	probable G-protein coupled receptor 22	NC_036786.1	15951728	15961545	TF318505	GPR22	G protein-coupled receptor 22 [Source:HGNC Symbol;Acc:4477]	G protein-coupled receptor 22 [Source:HGNC Symbol;Acc:4477]
LOC101470771	LOC101470771	transmembrane and coiled-coil domain protein 3	NC_036786.1	16194864	16209399	TF316292	TMCC3	transmembrane and coiled-coil domain family 3 [Source:HGNC Symbol;Acc:29199]	transmembrane and coiled-coil domain family 3 [Source:ZFIN;Acc:ZDB-GENE-030131-1811]
LOC101472790	metap2	methionyl aminopeptidase 2	NC_036786.1	16255178	16261212	TF300426	METAP2	methionyl aminopeptidase 2 [Source:HGNC Symbol;Acc:16672]	methionyl aminopeptidase 2a [Source:ZFIN;Acc:ZDB-GENE-061013-5]
LOC101473870	bpgm	bisphosphoglycerate mutase	NC_036786.1	16769462	16773620	TF300007	BPGM	2,3-bisphosphoglycerate mutase [Source:HGNC Symbol;Acc:1093]	2,3-bisphosphoglycerate mutase [Source:ZFIN;Acc:ZDB-GENE-040718-375]
LOC101479938	LOC101479938	glucoside xylosyltransferase 1%2C transcript variant X1	NC_036786.1	17203816	17212617	TF323210	GXYLT1	glucoside xylosyltransferase 1 [Source:HGNC Symbol;Acc:27482]	Uncharacterized protein [Source:UniProtKB/TrEMBL;Acc:E7F0M8]
LOC101481198	LOC101481198	prickle-like protein 1%2C transcript variant X1	NC_036786.1	17237226	17260647	TF313265	PRICKLE1	prickle homolog 1 (Drosophila) [Source:HGNC Symbol;Acc:17019]	prickle-like 1 (Drosophila) a [Source:ZFIN;Acc:ZDB-GENE-030724-5]
LOC101484918	nuak1	NUAK family kinase 1	NC_036786.1	17657609	17675731	TF324572	NUAK1	NUAK family, SNF1-like kinase, 1 [Source:HGNC Symbol;Acc:14311]	Uncharacterized protein [Source:UniProtKB/TrEMBL;Acc:E7FE46]
LOC101486253	LOC101486253	plexin-B2%2C transcript variant X1	NC_036786.1	17797885	17936327	TF312962	PLXNB2	plexin B2 [Source:HGNC Symbol;Acc:9104]	plexin b2a [Source:ZFIN;Acc:ZDB-GENE-030131-8917]
LOC111500970	LOC111500970	U4 spliceosomal RNA	NC_036786.1	17945690	17945830	NA	NA	NA	NA
LOC111500967	LOC111500967	U4 spliceosomal RNA	NC_036786.1	17946358	17946498	NA	NA	NA	NA
LOC101463676	parvg	parvin gamma%2C transcript variant X3	NC_036786.1	18062669	18074433	TF314025	PARVG	parvin, gamma [Source:HGNC Symbol;Acc:14654]	parvin, gamma [Source:ZFIN;Acc:ZDB-GENE-070410-67]
LOC101478901	LOC101478901	SRSF protein kinase 2	NC_036786.1	18163005	18235793	TF105334	SRPK2	SRSF protein kinase 2 [Source:HGNC Symbol;Acc:11306]	SRSF protein kinase 2 [Source:HGNC Symbol;Acc:11306]
LOC101467136	LOC101467136	potassium voltage-gated channel subfamily KQT member 1	NC_036786.1	18364182	18554246	TF315186	KCNQ5	potassium voltage-gated channel, KQT-like subfamily, member 5 [Source:HGNC Symbol;Acc:6299]	potassium voltage-gated channel, KQT-like subfamily, member 5a [Source:ZFIN;Acc:ZDB-GENE-090312-185]
LOC101469131	LOC101469131	peroxisome proliferator-activated receptor alpha%2C transcript variant X5	NC_036786.1	18575133	18662928	TF316304	PPARA	peroxisome proliferator-activated receptor alpha [Source:HGNC Symbol;Acc:9232]	peroxisome proliferator activated receptor alpha b [Source:ZFIN;Acc:ZDB-GENE-990415-211]
LOC101471999	mon2	MON2 homolog%2C regulator of endosome-to-Golgi trafficking%2C transcript variant X1	NC_036786.1	18892110	18925821	TF314287	MON2	MON2 homolog (S. cerevisiae) [Source:HGNC Symbol;Acc:29177]	MON2 homolog (S. cerevisiae) [Source:HGNC Symbol;Acc:29177]
LOC101472487	ppm1h	protein phosphatase%2C Mg2+/Mn2+ dependent 1H	NC_036786.1	18933552	18981586	TF314700	PPM1H	protein phosphatase, Mg2+/Mn2+ dependent, 1H [Source:HGNC Symbol;Acc:18583]	protein phosphatase, Mg2+/Mn2+ dependent, 1H [Source:ZFIN;Acc:ZDB-GENE-061027-190]
LOC101472972	LOC101472972	arg8-vasotocin receptor%2C transcript variant X1	NC_036786.1	19000547	19005589	TF106499	AVPR1A	arginine vasopressin receptor 1A [Source:HGNC Symbol;Acc:895]	arginine vasopressin receptor 1A [Source:HGNC Symbol;Acc:895]
LOC106676981	LOC106676981	uncharacterized LOC106676981	NC_036786.1	19020873	19021828	NoHit	NA	NA	NA
LOC111500690	LOC111500690	uncharacterized LOC111500690	NC_036786.1	19053411	19054742	NoHit	NA	NA	NA
LOC112435143	LOC112435143	uncharacterized LOC112435143	NC_036786.1	19083808	19085607	NA	NA	NA	NA
LOC101471253	LOC101471253	high mobility group protein 20A%2C transcript variant X1	NC_036786.1	19141969	19152402	TF106440	HMG20A	high mobility group 20A [Source:HGNC Symbol;Acc:5001]	high-mobility group 20A [Source:ZFIN;Acc:ZDB-GENE-030131-5107]
LOC101471742	peak1	pseudopodium enriched atypical kinase 1%2C transcript variant X1	NC_036786.1	19157930	19260431	TF333340	PEAK1_HUMAN	Pseudopodium-enriched atypical kinase 1 [Source:UniProtKB/Swiss-Prot;Acc:Q9H792]	Uncharacterized protein [Source:UniProtKB/TrEMBL;Acc:E7F7V3]
LOC112435126	LOC112435126	catalase-like%2C transcript variant X2	NC_036786.1	19299240	19308108	TF300540	CAT	catalase [Source:HGNC Symbol;Acc:1516]	catalase [Source:ZFIN;Acc:ZDB-GENE-000210-20]
LOC112435209	LOC112435209	dispanin subfamily A member 2b-like	NC_036786.1	19346882	19348621	TF334894	IFITM3	interferon induced transmembrane protein 3 [Source:HGNC Symbol;Acc:5414]	interferon induced transmembrane protein 5 [Source:HGNC Symbol;Acc:16644]
LOC112435166	LOC112435166	uncharacterized LOC112435166	NC_036786.1	19365302	19366633	NoHit	NA	NA	NA
LOC101470786	LOC101470786	leucine-rich repeat and immunoglobulin-like domain-containing nogo receptor-interacting protein 1%2C transcript variant X2	NC_036786.1	19555853	19684633	TF334360	LINGO1	leucine rich repeat and Ig domain containing 1 [Source:HGNC Symbol;Acc:21205]	leucine rich repeat and Ig domain containing 1a [Source:ZFIN;Acc:ZDB-GENE-080327-16]
LOC111501516	LOC111501516	uncharacterized LOC111501516	NC_036786.1	19711296	19712821	NA	NA	NA	NA
LOC101470578	LOC101470578	uncharacterized LOC101470578	NC_036786.1	19964908	19966490	NA	NA	NA	NA
LOC101470287	cspg4	chondroitin sulfate proteoglycan 4	NC_036786.1	19982208	20057347	TF316876	CSPG4	chondroitin sulfate proteoglycan 4 [Source:HGNC Symbol;Acc:2466]	chondroitin sulfate proteoglycan 4 [Source:ZFIN;Acc:ZDB-GENE-050519-1]
LOC101469055	ptpn9	protein tyrosine phosphatase%2C non-receptor type 9	NC_036786.1	20127216	20154881	TF351975	PTPN9	protein tyrosine phosphatase, non-receptor type 9 [Source:HGNC Symbol;Acc:9661]	protein tyrosine phosphatase, non-receptor type 9, a [Source:ZFIN;Acc:ZDB-GENE-101027-1]
LOC101468364	sin3a	SIN3 transcription regulator family member A%2C transcript variant X1	NC_036786.1	20156710	20173421	TF106187	SIN3A	SIN3 transcription regulator homolog A (yeast) [Source:HGNC Symbol;Acc:19353]	SIN3 homolog A, transcription regulator (yeast) a [Source:ZFIN;Acc:ZDB-GENE-070620-3]
LOC101465060	ap3b2	adaptor related protein complex 3 beta 2 subunit%2C transcript variant X1	NC_036786.1	20276515	20335607	TF314605	AP3B2	adaptor-related protein complex 3, beta 2 subunit [Source:HGNC Symbol;Acc:567]	Uncharacterized protein [Source:UniProtKB/TrEMBL;Acc:E7FFW0]
LOC101468913	LOC101468913	unconventional myosin-IXa%2C transcript variant X1	NC_036786.1	20452823	20606803	TF319651	MYO9B	myosin IXB [Source:HGNC Symbol;Acc:7609]	Uncharacterized protein [Source:UniProtKB/TrEMBL;Acc:E7F3F0]
LOC101474165	hsd17b12	hydroxysteroid 17-beta dehydrogenase 12	NC_036786.1	21032306	21050580	TF314591	HSD17B12	hydroxysteroid (17-beta) dehydrogenase 12 [Source:HGNC Symbol;Acc:18646]	hydroxysteroid (17-beta) dehydrogenase 12a [Source:ZFIN;Acc:ZDB-GENE-030131-5628]
LOC101482270	LOC101482270	patatin-like phospholipase domain-containing protein 2%2C transcript variant X1	NC_036786.1	21168415	21184557	TF314272	PNPLA3	patatin-like phospholipase domain containing 3 [Source:HGNC Symbol;Acc:18590]	patatin-like phospholipase domain containing 3 [Source:ZFIN;Acc:ZDB-GENE-040718-27]
LOC101480143	LOC101480143	pleckstrin homology domain-containing family A member 7%2C transcript variant X3	NC_036786.1	21279763	21420921	TF329090	PLEKHA7	pleckstrin homology domain containing, family A member 7 [Source:HGNC Symbol;Acc:27049]	pleckstrin homology domain containing, family A member 7a [Source:ZFIN;Acc:ZDB-GENE-050419-75]
LOC101479570	LOC101479570	transcription factor SOX-6%2C transcript variant X1	NC_036786.1	21432550	21538675	TF320471	SOX6	SRY (sex determining region Y)-box 6 [Source:HGNC Symbol;Acc:16421]	SRY-box containing gene 6 [Source:ZFIN;Acc:ZDB-GENE-081120-6]
LOC101477692	psma1	proteasome subunit alpha 1	NC_036786.1	21688581	21692248	TF106206	PSMA1	proteasome (prosome, macropain) subunit, alpha type, 1 [Source:HGNC Symbol;Acc:9530]	proteasome (prosome, macropain) subunit, alpha type, 1 [Source:ZFIN;Acc:ZDB-GENE-040801-15]
LOC101473164	LOC101473164	AMP deaminase 3%2C transcript variant X1	NC_036786.1	21865982	21887192	TF300439	AMPD3	adenosine monophosphate deaminase 3 [Source:HGNC Symbol;Acc:470]	adenosine monophosphate deaminase 3a [Source:ZFIN;Acc:ZDB-GENE-110407-2]
LOC101471912	borcs5	BLOC-1 related complex subunit 5	NC_036786.1	22048278	22054325	TF316379	LOH12CR1	loss of heterozygosity, 12, chromosomal region 1 [Source:HGNC Symbol;Acc:17950]	loss of heterozygosity, 12, chromosomal region 1 homolog (human) [Source:ZFIN;Acc:ZDB-GENE-041010-83]
LOC101470854	LOC101470854	copine-8%2C transcript variant X1	NC_036786.1	22097081	22187884	TF316419	CPNE8	copine VIII [Source:HGNC Symbol;Acc:23498]	Uncharacterized protein [Source:UniProtKB/TrEMBL;Acc:E7F5X2]
LOC101469223	LOC101469223	proton myo-inositol cotransporter%2C transcript variant X5	NC_036786.1	22256111	22264718	TF314916	SLC2A13	solute carrier family 2 (facilitated glucose transporter), member 13 [Source:HGNC Symbol;Acc:15956]	Uncharacterized protein [Source:UniProtKB/TrEMBL;Acc:E7F2C5]
LOC101472978	lrriq1	leucine rich repeats and IQ motif containing 1	NC_036786.1	22335302	22373046	TF333460	LRRIQ1	leucine-rich repeats and IQ motif containing 1 [Source:HGNC Symbol;Acc:25708]	leucine-rich repeats and IQ motif containing 1 [Source:ZFIN;Acc:ZDB-GENE-050419-235]
LOC101468332	alx1	ALX homeobox 1	NC_036786.1	22375859	22380826	TF350743	ALX1	ALX homeobox 1 [Source:HGNC Symbol;Acc:1494]	ALX homeobox 1 [Source:ZFIN;Acc:ZDB-GENE-050419-191]
LOC101468036	rassf9	Ras association domain family member 9	NC_036786.1	22446465	22457964	TF326923	RASSF9	Ras association (RalGDS/AF-6) domain family (N-terminal) member 9 [Source:HGNC Symbol;Acc:15739]	Ras association (RalGDS/AF-6) domain family (N-terminal) member 9 [Source:ZFIN;Acc:ZDB-GENE-091204-470]
LOC106675125	mgat4c	MGAT4 family member C%2C transcript variant X1	NC_036786.1	22481544	22624619	TF324570	MGAT4C	mannosyl (alpha-1,3-)-glycoprotein beta-1,4-N-acetylglucosaminyltransferase, isozyme C (putative) [Source:HGNC Symbol;Acc:30871]	mannosyl (alpha-1,3-)-glycoprotein beta-1,4-N-acetylglucosaminyltransferase, isozyme C (putative) [Source:ZFIN;Acc:ZDB-GENE-091204-429]
LOC101472382	LOC101472382	eukaryotic translation initiation factor 4 gamma 2	NC_036786.1	22730767	22744739	TF101528	EIF4G2	eukaryotic translation initiation factor 4 gamma, 2 [Source:HGNC Symbol;Acc:3297]	eukaryotic translation initiation factor 4, gamma 2b [Source:ZFIN;Acc:ZDB-GENE-030131-6550]
LOC101466285	cep290	centrosomal protein 290%2C transcript variant X1	NC_036786.1	22765804	22806329	TF326911	CEP290	centrosomal protein 290kDa [Source:HGNC Symbol;Acc:29021]	centrosomal protein 290 [Source:ZFIN;Acc:ZDB-GENE-041111-243]
LOC101466761	tmtc3	transmembrane and tetratricopeptide repeat containing 3%2C transcript variant X1	NC_036786.1	22806395	22838786	TF328339	TMTC3	transmembrane and tetratricopeptide repeat containing 3 [Source:HGNC Symbol;Acc:26899]	transmembrane and tetratricopeptide repeat containing 3 [Source:ZFIN;Acc:ZDB-GENE-061221-2]
LOC101465508	kitlg	KIT ligand	NC_036786.1	22917153	22944551	TF330811	KITLG	KIT ligand [Source:HGNC Symbol;Acc:6343]	kit ligand a [Source:ZFIN;Acc:ZDB-GENE-070424-1]
LOC101471804	LOC101471804	solute carrier family 23 member 2	NC_036786.1	22982936	23056048	TF313272	SLC23A2	solute carrier family 23 (nucleobase transporters), member 2 [Source:HGNC Symbol;Acc:10973]	Uncharacterized protein [Source:UniProtKB/TrEMBL;Acc:F1R0M3]
LOC112435200	LOC112435200	uncharacterized LOC112435200	NC_036786.1	23136749	23138409	TF329999	NA	NA	si:ch211-240b21.2 [Source:ZFIN;Acc:ZDB-GENE-060526-125]	None	NANoHomolog
LOC101468411	dusp6	dual specificity phosphatase 6	NC_036786.1	23196648	23201427	TF105122	DUSP6	dual specificity phosphatase 6 [Source:HGNC Symbol;Acc:3072]	dual specificity phosphatase 6 [Source:ZFIN;Acc:ZDB-GENE-030613-1]
LOC101467710	poc1b	POC1 centriolar protein B%2C transcript variant X1	NC_036786.1	23240566	23293864	TF324210	POC1B	POC1 centriolar protein homolog B (Chlamydomonas) [Source:HGNC Symbol;Acc:30836]	POC1 centriolar protein homolog B (Chlamydomonas) [Source:ZFIN;Acc:ZDB-GENE-031118-54]
LOC101467206	cep41	centrosomal protein 41%2C transcript variant X2	NC_036786.1	23294354	23302478	TF324682	CEP41	centrosomal protein 41kDa [Source:HGNC Symbol;Acc:12370]	centrosomal protein 41 [Source:ZFIN;Acc:ZDB-GENE-040704-35]
LOC101466641	LOC101466641	carboxypeptidase A1	NC_036786.1	23334913	23341015	TF317197	CPA1	carboxypeptidase A1 (pancreatic) [Source:HGNC Symbol;Acc:2296]	carboxypeptidase A5 [Source:ZFIN;Acc:ZDB-GENE-020514-1]
LOC101464802	st7	suppression of tumorigenicity 7%2C transcript variant X1	NC_036786.1	23558943	23618569	TF314162	ST7	suppression of tumorigenicity 7 [Source:HGNC Symbol;Acc:11351]	suppression of tumorigenicity 7 [Source:HGNC Symbol;Acc:11351]
LOC101464047	asz1	ankyrin repeat%2C SAM and basic leucine zipper domain containing 1	NC_036786.1	23638356	23673366	TF352216	ASZ1	ankyrin repeat, SAM and basic leucine zipper domain containing 1 [Source:HGNC Symbol;Acc:1350]	ankyrin repeat, SAM and basic leucine zipper domain containing 1 [Source:ZFIN;Acc:ZDB-GENE-040426-988]
LOC101463746	cttnbp2	cortactin binding protein 2	NC_036786.1	23719136	23821364	TF325130	CTTNBP2	cortactin binding protein 2 [Source:HGNC Symbol;Acc:15679]	cortactin binding protein 2 [Source:ZFIN;Acc:ZDB-GENE-030131-8134]
LOC101486227	LOC101486227	D(4) dopamine receptor	NC_036786.1	23906653	23919254	TF334382	DRD4	dopamine receptor D4 [Source:HGNC Symbol;Acc:3025]	dopamine receptor D4b [Source:ZFIN;Acc:ZDB-GENE-070508-3]
LOC112435176	LOC112435176	uncharacterized LOC112435176	NC_036786.1	24103819	24105908	NA	NA	NA	NA
LOC105941020	LOC105941020	uncharacterized LOC105941020	NC_036786.1	24218715	24223406	NA	NA	NA	NA
LOC101480015	LOC101480015	metabotropic glutamate receptor 8%2C transcript variant X1	NC_036786.1	24291084	24458846	TF313240	GRM8	glutamate receptor, metabotropic 8 [Source:HGNC Symbol;Acc:4600]	glutamate receptor, metabotropic 8 [Source:HGNC Symbol;Acc:4600]
LOC101479457	LOC101479457	hyaluronidase PH-20	NC_036786.1	24583658	24586401	TF321598	SPAM1	sperm adhesion molecule 1 (PH-20 hyaluronidase, zona pellucida binding) [Source:HGNC Symbol;Acc:11217]	sperm adhesion molecule 1 [Source:ZFIN;Acc:ZDB-GENE-050506-63]
LOC101478980	LOC101478980	hyaluronidase-4%2C transcript variant X1	NC_036786.1	24588875	24605867	TF321598	HYAL4	hyaluronoglucosaminidase 4 [Source:HGNC Symbol;Acc:5323]	hyaluronoglucosaminidase 4 [Source:HGNC Symbol;Acc:5323]
LOC101477761	LOC101477761	neural Wiskott-Aldrich syndrome protein%2C transcript variant X1	NC_036786.1	24632072	24662181	TF316736	WASL	Wiskott-Aldrich syndrome-like [Source:HGNC Symbol;Acc:12735]	Wiskott-Aldrich syndrome-like a [Source:ZFIN;Acc:ZDB-GENE-070209-220]
LOC101471879	LOC101471879	NT-3 growth factor receptor	NC_036786.1	24716855	24811093	TF106465	NTRK3	neurotrophic tyrosine kinase, receptor, type 3 [Source:HGNC Symbol;Acc:8033]	neurotrophic tyrosine kinase, receptor, type 3a [Source:ZFIN;Acc:ZDB-GENE-010126-3]
LOC101471584	LOC101471584	cytosolic carboxypeptidase 4%2C transcript variant X1	NC_036786.1	24827654	24917355	TF333192	NA	NA	NA	None	NANoHomolog
LOC101470622	ripor1	RHO family interacting cell polarization regulator 1%2C transcript variant X1	NC_036786.1	25317937	25368902	TF329332	FAM65A	family with sequence similarity 65, member A [Source:HGNC Symbol;Acc:25836]	family with sequence similarity 65, member A [Source:ZFIN;Acc:ZDB-GENE-050420-32]
LOC101468811	LOC101468811	synembryn-A%2C transcript variant X1	NC_036786.1	25459857	25485141	TF314907	RIC8A	resistance to inhibitors of cholinesterase 8 homolog A (C. elegans) [Source:HGNC Symbol;Acc:29550]	resistance to inhibitors of cholinesterase 8 homolog A [Source:ZFIN;Acc:ZDB-GENE-040927-18]
[truncated: 4,865 more rows]

## Sheet: SFARI intersect RS
List of divergent genes found in the SFARI database
[truncated: 370 more rows]

## Sheet: Neurocristopathy intersect RS
List of divergent genes found in the neurocristopathies database
[truncated: 1,794 more rows]

[truncated: 18 more sheets: Craniofacial_ele_with_fixed_SNP, HCNC_with_fixed_SNP, Analysis Gene set, GO Molecular Function, GO Biological process, GO Cellular component, Phenotype, Domain, Pathway, Pubmed, Interaction, Cytoband, TF binding site, Gene Family, Co-expression, MiRNA, Disease & Drug, Computational]
