# Supplementary material for: Genome-enabled inference of functional genetic variants in the face, brain and behavior
Source: bioRxiv preprint, doi:10.1101/2020.10.12.336453, version 1 (2020-10-12)
Supplement: Supplementary Table 3 RNA-seq DEG [file 336453_file04.xlsx]

## Sheet: Cichlid Gene list
	logFC	AveExpr	t	P.Value	adj.P.Val	B	GeneName	CommonName	GFFAnnotation	Scaffold	Start	Stop	Length	HGNC	HumanDescription	ZebraDescription
gene10955	-2.82125	10.3662	-8.93165	1.12e-10	2.03e-06	14.3231	LOC101485530	LOC101485530	ependymin-1	NC_036789.1	10797659	10799307	1649	EPDR1	ependymin related protein 1 (zebrafish) [Source:HGNC Symbol;Acc:17572]	ependymin [Source:ZFIN;Acc:ZDB-GENE-980526-111]
gene21820	-4.69736	3.79306	-8.40541	5.03e-10	4.55e-06	12.2645	LOC101466231	csde1	cold shock domain containing E1%2C transcript variant X5	NC_036799.1	10386082	10401626	15545	CSDE1	cold shock domain containing E1, RNA-binding [Source:HGNC Symbol;Acc:29905]	cold shock domain containing E1, RNA-binding [Source:ZFIN;Acc:ZDB-GENE-030131-8623]
gene19941	-2.86965	8.41552	-7.89123	2.25e-09	1.35e-05	11.4335	LOC101465129	cirbp	cold inducible RNA binding protein%2C transcript variant X1	NC_036797.1	16214937	16219417	4481	CIRBP	cold inducible RNA binding protein [Source:HGNC Symbol;Acc:1982]	cold inducible RNA binding protein [Source:ZFIN;Acc:ZDB-GENE-030131-5841]
gene7346	-2.317	9.64072	-7.32622	1.2e-08	5.44e-05	9.7388	LOC101478899	slc1a2	solute carrier family 1 member 2%2C transcript variant X2	NC_036786.1	6305333	6334381	29049	SLC1A2	solute carrier family 1 (glial high affinity glutamate transporter), member 2 [Source:HGNC Symbol;Acc:10940]	CantFind
gene27262	-1.59282	10.5419	-7.07103	2.6e-08	7.86e-05	8.89158	LOC101466337	LOC101466337	prothymosin alpha-B	NW_020192451.1	215138	218668	3531	PTMA	prothymosin, alpha [Source:HGNC Symbol;Acc:9623]	prothymosin, alpha a [Source:ZFIN;Acc:ZDB-GENE-030131-7647]
gene14996	-2.97225	8.14604	-6.97514	3.47e-08	7.86e-05	8.78808	LOC101475860	calm2	calmodulin 2	NC_036792.1	26979135	26983185	4051	CALM2	calmodulin 2 (phosphorylase kinase, delta) [Source:HGNC Symbol;Acc:1445]	calmodulin 3b (phosphorylase kinase, delta) [Source:ZFIN;Acc:ZDB-GENE-030131-527]
gene12742	-4.58994	4.31337	-6.98239	3.4e-08	7.86e-05	8.51594	LOC101473054	tmem106b	transmembrane protein 106B	NC_036790.1	27799384	27809751	10368	TMEM106B	transmembrane protein 106B [Source:HGNC Symbol;Acc:22407]	transmembrane protein 106Bb [Source:ZFIN;Acc:ZDB-GENE-050913-37]
gene15792	-4.15411	3.46449	-6.97431	3.48e-08	7.86e-05	8.48673	LOC101474427	LOC101474427	1-phosphatidylinositol 4%2C5-bisphosphate phosphodiesterase eta-1%2C transcript variant X3	NC_036793.1	23685869	23757015	71147	PLCH1	phospholipase C, eta 1 [Source:HGNC Symbol;Acc:29185]	phospholipase C, eta 1 [Source:ZFIN;Acc:ZDB-GENE-060503-398]
gene15582	-2.88984	7.28047	-6.85016	5.07e-08	8.49e-05	8.41961	LOC101486472	spa17	sperm autoantigenic protein 17%2C transcript variant X1	NC_036793.1	18652547	18666584	14038	SPA17	sperm autoantigenic protein 17 [Source:HGNC Symbol;Acc:11210]	NA
gene15629	-2.69364	7.65463	-6.84374	5.17e-08	8.49e-05	8.40826	LOC101468630	calm3	calmodulin 3	NC_036793.1	20068824	20081028	12205	CALM2	calmodulin 2 (phosphorylase kinase, delta) [Source:HGNC Symbol;Acc:1445]	calmodulin 3b (phosphorylase kinase, delta) [Source:ZFIN;Acc:ZDB-GENE-030131-527]
gene6157	1.38636	12.0701	6.93504	3.92e-08	7.87e-05	8.22983	LOC101486876	ncf4	neutrophil cytosolic factor 4	NC_036785.1	11393269	11433755	40487	SH3D19	SH3 domain containing 19 [Source:HGNC Symbol;Acc:30418]	neutrophil cytosolic factor 4 [Source:ZFIN;Acc:ZDB-GENE-041124-1]
gene19528	-1.85436	9.66758	-6.77273	6.42e-08	9.66e-05	8.07658	LOC101480114	mpz	myelin protein zero%2C transcript variant X1	NC_036797.1	5440066	5454729	14664	MPZ	myelin protein zero [Source:HGNC Symbol;Acc:7225]	myelin protein zero [Source:ZFIN;Acc:ZDB-GENE-010724-4]
gene5163	-3.74441	3.21533	-6.62141	1.02e-07	0.000141455	7.50376	LOC101485690	LOC101485690	rho-related GTP-binding protein RhoA-B	NC_036784.1	17386462	17390564	4103	RHOA	ras homolog family member A [Source:HGNC Symbol;Acc:667]	ras homolog gene family, member Ab [Source:ZFIN;Acc:ZDB-GENE-040322-2]
gene16777	-2.19693	8.8445	-6.52219	1.38e-07	0.000173044	7.3953	LOC101486975	hsp90ab1	heat shock protein 90 alpha family class B member 1	NC_036794.1	13745745	13750333	4589	HSP90AB1	heat shock protein 90kDa alpha (cytosolic), class B member 1 [Source:HGNC Symbol;Acc:5258]	heat shock protein 90, alpha (cytosolic), class B member 1 [Source:ZFIN;Acc:ZDB-GENE-990415-95]
gene9537	-2.62297	7.34818	-6.49343	1.51e-07	0.000173044	7.38464	LOC101477261	LOC101477261	V-type proton ATPase 16 kDa proteolipid subunit	NC_036787.1	8796168	8804190	8023	ATP6V0C	ATPase, H+ transporting, lysosomal 16kDa, V0 subunit c [Source:HGNC Symbol;Acc:855]	ATPase, H+ transporting, lysosomal, V0 subunit c, a [Source:ZFIN;Acc:ZDB-GENE-020419-23]
gene20000	-3.87092	3.29309	-6.48759	1.53e-07	0.000173044	7.1465	LOC101467832	LOC101467832	coatomer subunit beta'%2C transcript variant X1	NC_036797.1	17495975	17503643	7669	COPB2	coatomer protein complex, subunit beta 2 (beta prime) [Source:HGNC Symbol;Acc:2232]	coatomer protein complex, subunit beta 2 [Source:ZFIN;Acc:ZDB-GENE-010724-7]
gene3950	-2.50448	7.47062	-6.22451	3.43e-07	0.000344796	6.5906	LOC101480315	LOC101480315	G-protein coupled receptor family C group 5 member B%2C transcript variant X1	NC_036783.1	16224140	16241263	17124	GPRC5B	G protein-coupled receptor, family C, group 5, member B [Source:HGNC Symbol;Acc:13308]	G protein-coupled receptor, family C, group 5, member B [Source:HGNC Symbol;Acc:13308]
gene14491	-2.33451	7.56225	-6.17449	4.01e-07	0.000361919	6.4367	LOC101468296	LOC101468296	ankyrin-3%2C transcript variant X1	NC_036792.1	12024301	12114862	90562	NA	NA	NA
gene16437	-2.05723	8.16794	-6.18568	3.87e-07	0.000361919	6.42953	LOC101474541	LOC101474541	heat shock protein HSP 90-alpha	NC_036794.1	4894445	4901580	7136	HSP90AA1	heat shock protein 90kDa alpha (cytosolic), class A member 1 [Source:HGNC Symbol;Acc:5253]	heat shock protein 90, alpha (cytosolic), class A member 1, tandem duplicate 2 [Source:ZFIN;Acc:ZDB-GENE-031001-3]
gene2524	-2.39532	7.70831	-6.07999	5.36e-07	0.000440067	6.15038	LOC101478721	LOC101478721	protein NDRG2%2C transcript variant X1	NC_036782.1	15640035	15689397	49363	NDRG2	NDRG family member 2 [Source:HGNC Symbol;Acc:14460]	N-myc downstream regulated gene 2 [Source:ZFIN;Acc:ZDB-GENE-041212-15]
gene5828	-3.94647	3.88849	-6.08469	5.28e-07	0.000440067	6.0362	LOC101474824	eif3b	eukaryotic translation initiation factor 3 subunit B	NC_036785.1	662118	668334	6217	EIF3B	eukaryotic translation initiation factor 3, subunit B [Source:HGNC Symbol;Acc:3280]	eukaryotic translation initiation factor 3, subunit Ba [Source:ZFIN;Acc:ZDB-GENE-030131-2748]
gene11444	-3.87173	3.30016	-6.03817	6.09e-07	0.000478791	5.90929	LOC101465541	LOC101465541	gamma-aminobutyric acid receptor subunit beta-2	NC_036789.1	21436898	21508041	71144	GABRB2	gamma-aminobutyric acid (GABA) A receptor, beta 2 [Source:HGNC Symbol;Acc:4082]	gamma-aminobutyric acid (GABA) A receptor, beta 2 [Source:HGNC Symbol;Acc:4082]
gene12060	-1.78736	8.9233	-6.01228	6.6e-07	0.000496933	5.84373	LOC101487221	LOC101487221	myelin basic protein%2C transcript variant X2	NC_036790.1	11516282	11531411	15130	MBP	myelin basic protein [Source:HGNC Symbol;Acc:6925]	NA
gene13639	-3.54655	3.11778	-5.93985	8.25e-07	0.000596362	5.62285	LOC101465834	lg12h5orf51	linkage group 12 C5orf51 homolog%2C transcript variant X1	NC_036791.1	21858550	21864948	6399	C5orf51	chromosome 5 open reading frame 51 [Source:HGNC Symbol;Acc:27750]	chromosome 5 open reading frame 51 [Source:HGNC Symbol;Acc:27750]
gene26724	-1.8004	8.42571	-5.92227	8.71e-07	0.000605349	5.61414	LOC101487084	LOC101487084	neurofilament light polypeptide	NW_020192409.1	177943	180958	3016	INA	internexin neuronal intermediate filament protein, alpha [Source:HGNC Symbol;Acc:6057]	si:dkey-33c12.3 [Source:ZFIN;Acc:ZDB-GENE-030131-7320]
gene23828	-3.81214	4.00466	-5.88482	9.78e-07	0.000654276	5.46327	LOC101477957	LOC101477957	elongation of very long chain fatty acids protein 1%2C transcript variant X2	NC_036801.1	2293040	2305877	12838	ELOVL1	ELOVL fatty acid elongase 1 [Source:HGNC Symbol;Acc:14418]	elongation of very long chain fatty acids (FEN1/Elo2, SUR4/Elo3, yeast)-like 1b [Source:ZFIN;Acc:ZDB-GENE-040426-2755]
gene27662	-3.60936	3.70426	-5.8505	1.09e-06	0.000701346	5.3786	LOC101466348	scfd1	sec1 family domain containing 1	NW_020192490.1	192415	229135	36721	SCFD1	sec1 family domain containing 1 [Source:HGNC Symbol;Acc:20726]	suppressor of ypt1 [Source:ZFIN;Acc:ZDB-GENE-030116-3]
gene1432	-1.7421	8.39702	-5.83639	1.14e-06	0.000707277	5.35626	LOC101477693	sncb	synuclein beta%2C transcript variant X1	NC_036781.1	19410728	19422638	11911	SNCB	synuclein, beta [Source:HGNC Symbol;Acc:11140]	synuclein, beta [Source:ZFIN;Acc:ZDB-GENE-040426-1615]
gene6731	-1.97115	7.58967	-5.77433	1.37e-06	0.000801221	5.23798	LOC101480422	LOC101480422	tubulin beta-4B chain	NC_036785.1	28413232	28416564	3333	TUBB	tubulin, beta class I [Source:HGNC Symbol;Acc:20778]	zgc:65894 [Source:ZFIN;Acc:ZDB-GENE-030131-7741]
gene6203	-3.37929	3.01919	-5.79166	1.3e-06	0.00078484	5.20476	LOC101481533	tapt1	transmembrane anterior posterior transformation 1	NC_036785.1	13064694	13074816	10123	TAPT1	transmembrane anterior posterior transformation 1 [Source:HGNC Symbol;Acc:26887]	transmembrane anterior posterior transformation 1b [Source:ZFIN;Acc:ZDB-GENE-030131-4025]
gene21571	-2.59	6.3604	-5.73433	1.56e-06	0.000851487	5.15881	LOC101486993	slc6a17	solute carrier family 6 member 17	NC_036799.1	4021523	4045791	24269	SLC6A17	solute carrier family 6, member 17 [Source:HGNC Symbol;Acc:31399]	solute carrier family 6, member 17 [Source:ZFIN;Acc:ZDB-GENE-030131-8187]
gene21529	-3.33769	2.97862	-5.76369	1.42e-06	0.000802084	5.12389	LOC101471106	LOC101471106	prostaglandin E synthase 3	NC_036799.1	3279027	3282922	3896	PTGES3	prostaglandin E synthase 3 (cytosolic) [Source:HGNC Symbol;Acc:16049]	prostaglandin E synthase 3a (cytosolic) [Source:ZFIN;Acc:ZDB-GENE-040426-2200]
gene16842	-2.29831	7.66138	-5.66136	1.95e-06	0.00103506	4.90679	LOC101465846	clu	clusterin	NC_036794.1	16468833	16479295	10463	CLU	clusterin [Source:HGNC Symbol;Acc:2095]	clusterin [Source:ZFIN;Acc:ZDB-GENE-040426-1774]
gene10982	-2.20878	7.07282	-5.60608	2.31e-06	0.00117456	4.77563	LOC101485486	LOC101485486	sodium/potassium-transporting ATPase subunit beta-2%2C transcript variant X1	NC_036789.1	11238020	11248548	10529	ATP1B2	ATPase, Na+/K+ transporting, beta 2 polypeptide [Source:HGNC Symbol;Acc:805]	ATPase, Na+/K+ transporting, beta 2b polypeptide [Source:ZFIN;Acc:ZDB-GENE-010718-1]
gene17705	-3.55929	3.50073	-5.60184	2.34e-06	0.00117456	4.69491	LOC101476324	dcbld2	discoidin%2C CUB and LCCL domain containing 2%2C transcript variant X1	NC_036795.1	12111769	12133035	21267	DCBLD2	discoidin, CUB and LCCL domain containing 2 [Source:HGNC Symbol;Acc:24627]	NA
gene4905	-3.44978	3.62485	-5.59026	2.43e-06	0.00118435	4.6535	LOC105940424	LOC105940424	golgin subfamily A member 7	NC_036784.1	11774699	11777949	3251	GOLGA7	golgin A7 [Source:HGNC Symbol;Acc:24876]	golgi autoantigen, golgin subfamily a, 7 [Source:ZFIN;Acc:ZDB-GENE-040625-142]
gene1355	-2.78466	7.08293	-5.52424	2.97e-06	0.0013773	4.54787	LOC101482749	itm2a	integral membrane protein 2A	NC_036781.1	16770158	16777046	6889	ITM2A	integral membrane protein 2A [Source:HGNC Symbol;Acc:6173]	integral membrane protein 2Ba [Source:ZFIN;Acc:ZDB-GENE-030131-2352]
gene23892	-1.81159	8.22293	-5.53054	2.92e-06	0.0013773	4.45575	LOC101478872	LOC101478872	scaffold attachment factor B2%2C transcript variant X1	NC_036801.1	3695891	3704830	8940	SAFB	scaffold attachment factor B [Source:HGNC Symbol;Acc:10520]	scaffold attachment factor B [Source:ZFIN;Acc:ZDB-GENE-030131-698]
gene6508	-3.18823	2.87846	-5.49936	3.21e-06	0.00144991	4.3855	LOC101473586	keap1	kelch like ECH associated protein 1%2C transcript variant X4	NC_036785.1	22382470	22398332	15863	KEAP1	kelch-like ECH-associated protein 1 [Source:HGNC Symbol;Acc:23177]	kelch-like ECH-associated protein 1b [Source:ZFIN;Acc:ZDB-GENE-080508-1]
gene20149	-3.2853	3.53868	-5.44984	3.74e-06	0.00153809	4.26031	LOC101469523	LOC101469523	ATP-dependent zinc metalloprotease YME1L1	NC_036797.1	19909021	19917569	8549	YME1L1	YME1-like 1 (S. cerevisiae) [Source:HGNC Symbol;Acc:12843]	YME1-like 1b [Source:ZFIN;Acc:ZDB-GENE-070410-25]
gene7660	-3.22186	3.27519	-5.44929	3.75e-06	0.00153809	4.25917	LOC101473919	LOC101473919	fatty acid desaturase 2	NC_036786.1	14066636	14073595	6960	FADS2	fatty acid desaturase 2 [Source:HGNC Symbol;Acc:3575]	fatty acid desaturase 2 [Source:ZFIN;Acc:ZDB-GENE-011212-1]
gene1140	-1.95921	7.89757	-5.45116	3.72e-06	0.00153809	4.25174	LOC101466731	gria2	glutamate ionotropic receptor AMPA type subunit 2%2C transcript variant X2	NC_036781.1	5586366	5638406	52041	GRIA2	glutamate receptor, ionotropic, AMPA 2 [Source:HGNC Symbol;Acc:4572]	glutamate receptor, ionotropic, AMPA 2b [Source:ZFIN;Acc:ZDB-GENE-020125-4]
gene17288	-3.49119	5.23717	-5.45884	3.64e-06	0.00153809	4.24458	LOC101469410	zranb2	zinc finger RANBP2-type containing 2	NC_036794.1	31685637	31690439	4803	ZRANB2	zinc finger, RAN-binding domain containing 2 [Source:HGNC Symbol;Acc:13058]	zinc finger, RAN-binding domain containing 2 [Source:ZFIN;Acc:ZDB-GENE-040426-2743]
gene1803	-2.59477	6.51671	-5.41569	4.15e-06	0.00160931	4.24222	LOC101473000	cfl1	cofilin 1	NC_036781.1	28151752	28159980	8229	CFL1	cofilin 1 (non-muscle) [Source:HGNC Symbol;Acc:1874]	cofilin 1 [Source:ZFIN;Acc:ZDB-GENE-030131-215]
gene5236	-2.62797	7.13359	-5.40901	4.24e-06	0.00160931	4.20577	LOC101483347	slc6a11	solute carrier family 6 member 11%2C transcript variant X1	NC_036784.1	18992724	19016406	23683	SLC6A13	solute carrier family 6 (neurotransmitter transporter, GABA), member 13 [Source:HGNC Symbol;Acc:11046]	solute carrier family 6 (neurotransmitter transporter, GABA), member 11 [Source:HGNC Symbol;Acc:11044]
gene7501	-3.23944	2.93624	-5.41041	4.22e-06	0.00160931	4.14443	LOC101486023	c2cd5	C2 calcium dependent domain containing 5%2C transcript variant X1	NC_036786.1	10533160	10559545	26386	C2CD5	C2 calcium-dependent domain containing 5 [Source:HGNC Symbol;Acc:29062]	C2 calcium-dependent domain containing 5 [Source:HGNC Symbol;Acc:29062]
gene5340	-1.98926	7.56772	-5.38786	4.53e-06	0.0016355	4.09291	LOC101471949	LOC101471949	RNA-binding protein 5	NC_036784.1	21292979	21303573	10595	RBM5	RNA binding motif protein 5 [Source:HGNC Symbol;Acc:9902]	RNA binding motif protein 6 [Source:HGNC Symbol;Acc:9903]
gene17786	-1.9259	8.07881	-5.4003	4.36e-06	0.00160931	4.08245	LOC101478308	LOC101478308	amyloid-beta A4 protein%2C transcript variant X1	NC_036795.1	13915655	13933559	17905	APP	amyloid beta (A4) precursor protein [Source:HGNC Symbol;Acc:620]	amyloid beta (A4) precursor protein b [Source:ZFIN;Acc:ZDB-GENE-020220-1]
gene27811	-3.81116	4.90569	-5.39966	4.36e-06	0.00160931	4.06317	LOC101475289	LOC101475289	pentraxin fusion protein	NW_020192503.1	147935	151278	3344	PTX3	pentraxin 3, long [Source:HGNC Symbol;Acc:9692]	C-reactive protein 1 [Source:ZFIN;Acc:ZDB-GENE-060503-314]
gene10359	-3.33865	3.58949	-5.32725	5.45e-06	0.00191639	3.92313	LOC101476997	LOC101476997	uncharacterized LOC101476997	NC_036788.1	9814391	9830808	16418	ESCO1	establishment of cohesion 1 homolog 1 (S. cerevisiae) [Source:HGNC Symbol;Acc:24645]	establishment of cohesion 1 homolog 1 (S. cerevisiae) [Source:HGNC Symbol;Acc:24645]
gene12424	-3.84445	4.06338	-5.31769	5.62e-06	0.00191639	3.896	LOC101479886	mlf2	myeloid leukemia factor 2	NC_036790.1	19167966	19176751	8786	MLF2	myeloid leukemia factor 2 [Source:HGNC Symbol;Acc:7126]	myeloid leukemia factor 2 [Source:ZFIN;Acc:ZDB-GENE-050913-67]
gene18568	-3.184	2.89662	-5.31682	5.63e-06	0.00191639	3.88326	LOC101468356	phyh	phytanoyl-CoA 2-hydroxylase	NC_036796.1	5846609	5853702	7094	PHYH	phytanoyl-CoA 2-hydroxylase [Source:HGNC Symbol;Acc:8940]	phytanoyl-CoA 2-hydroxylase [Source:ZFIN;Acc:ZDB-GENE-050417-361]
gene6350	-3.76546	4.35851	-5.28323	6.25e-06	0.00205175	3.77074	LOC101463819	LOC101463819	tetraspanin-5	NC_036785.1	17744532	17756440	11909	TSPAN5	tetraspanin 5 [Source:HGNC Symbol;Acc:17753]	tetraspanin 5 [Source:HGNC Symbol;Acc:17753]
gene15451	-3.27012	3.59898	-5.26435	6.62e-06	0.00209814	3.73993	LOC101464093	srpra	SRP receptor alpha subunit	NC_036793.1	14305065	14311608	6544	SRPR	signal recognition particle receptor (docking protein) [Source:HGNC Symbol;Acc:11307]	signal recognition particle receptor (docking protein) [Source:ZFIN;Acc:ZDB-GENE-030219-11]
gene22967	-3.5161	5.01548	-5.25612	6.79e-06	0.00211486	3.67622	LOC101471845	LOC101471845	protein PRRC2A%2C transcript variant X2	NC_036800.1	10766522	10786848	20327	PRRC2A	proline-rich coiled-coil 2A [Source:HGNC Symbol;Acc:13918]	proline-rich coiled-coil 2A [Source:ZFIN;Acc:ZDB-GENE-010501-4]
gene4266	-3.17709	2.87405	-5.24024	7.13e-06	0.00214665	3.6706	LOC101470712	phospho1	phosphoethanolamine/phosphocholine phosphatase%2C transcript variant X1	NC_036783.1	22990896	22993633	2738	PHOSPHO1	phosphatase, orphan 1 [Source:HGNC Symbol;Acc:16815]	phosphatase, orphan 1 [Source:ZFIN;Acc:ZDB-GENE-040801-198]
gene9646	-3.73803	4.75815	-5.24609	7e-06	0.00214415	3.64591	LOC101480389	LOC101480389	elongin-B	NC_036787.1	10855398	10861083	5686	TCEB2	transcription elongation factor B (SIII), polypeptide 2 (18kDa, elongin B) [Source:HGNC Symbol;Acc:11619]	NA
gene16396	-1.28786	9.82694	-5.31138	5.73e-06	0.00191639	3.62499	LOC101467739	chgb	chromogranin B	NC_036794.1	3626297	3630559	4263	CHGA	chromogranin A (parathyroid secretory protein 1) [Source:HGNC Symbol;Acc:1929]	chromogranin A [Source:ZFIN;Acc:ZDB-GENE-041010-161]
gene13468	-2.17785	7.29642	-5.21574	7.69e-06	0.00224618	3.61162	LOC101470878	tacc1	transforming acidic coiled-coil containing protein 1%2C transcript variant X1	NC_036791.1	17101016	17125928	24913	TACC1	transforming, acidic coiled-coil containing protein 1 [Source:HGNC Symbol;Acc:11522]	transforming, acidic coiled-coil containing protein 1 [Source:ZFIN;Acc:ZDB-GENE-090521-5]
gene7486	-3.23812	3.86798	-5.21483	7.71e-06	0.00224618	3.58769	LOC101468202	fam107b	family with sequence similarity 107 member B%2C transcript variant X1	NC_036786.1	10314527	10330302	15776	FAM107B	family with sequence similarity 107, member B [Source:HGNC Symbol;Acc:23726]	family with sequence similarity 107, member B [Source:ZFIN;Acc:ZDB-GENE-031030-12]
gene20007	-3.10914	3.24992	-5.19454	8.2e-06	0.00228032	3.55306	LOC101464834	LOC101464834	solute carrier family 25 member 36-A	NC_036797.1	17795998	17816785	20788	SLC25A36	solute carrier family 25 (pyrimidine nucleotide carrier ), member 36 [Source:HGNC Symbol;Acc:25554]	solute carrier family 25, member 36a [Source:ZFIN;Acc:ZDB-GENE-040718-415]
gene25545	-3.03893	2.80101	-5.19785	8.12e-06	0.00228032	3.54894	LOC101476180	LOC101476180	ADP-ribosylation factor 6	NW_020192340.1	67564	70331	2768	ARF6	ADP-ribosylation factor 6 [Source:HGNC Symbol;Acc:659]	ADP-ribosylation factor 6b [Source:ZFIN;Acc:ZDB-GENE-030131-9056]
gene7387	-3.50149	3.63907	-5.18071	8.56e-06	0.00234322	3.51925	LOC101468522	ube2n	ubiquitin conjugating enzyme E2 N	NC_036786.1	7899679	7906521	6843	UBE2N	ubiquitin-conjugating enzyme E2N [Source:HGNC Symbol;Acc:12492]	ubiquitin-conjugating enzyme E2Nb [Source:ZFIN;Acc:ZDB-GENE-040426-1291]
gene16319	-1.88569	8.24218	-5.19613	8.16e-06	0.00228032	3.457	LOC101471140	LOC101471140	visinin-like protein 1	NC_036794.1	486290	524133	37844	VSNL1	visinin-like 1 [Source:HGNC Symbol;Acc:12722]	visinin-like 1a [Source:ZFIN;Acc:ZDB-GENE-041001-211]
gene10799	-1.91269	7.55616	-5.1703	8.84e-06	0.00238326	3.44414	LOC101483838	fez1	fasciculation and elongation protein zeta 1	NC_036789.1	5313771	5331120	17350	FEZ1	fasciculation and elongation protein zeta 1 (zygin I) [Source:HGNC Symbol;Acc:3659]	fasciculation and elongation protein zeta 1 (zygin I) [Source:ZFIN;Acc:ZDB-GENE-040426-2723]
gene3771	1.13274	9.94699	5.26579	6.59e-06	0.00209814	3.40381	LOC101478856	LOC101478856	aspartate beta-hydroxylase domain-containing protein 2	NC_036783.1	12313469	12318958	5490	ASPHD2	aspartate beta-hydroxylase domain containing 2 [Source:HGNC Symbol;Acc:30437]	aspartate beta-hydroxylase domain containing 2 [Source:ZFIN;Acc:ZDB-GENE-061103-142]
gene21996	-3.23228	3.29302	-5.13492	9.85e-06	0.00258613	3.39033	LOC101482984	LOC101482984	glucose-induced degradation protein 8 homolog	NC_036799.1	16355143	16357895	2753	GID8	GID complex subunit 8 homolog (S. cerevisiae) [Source:HGNC Symbol;Acc:15857]	GID complex subunit 8 homolog a (S. cerevisiae) [Source:ZFIN;Acc:ZDB-GENE-040426-1669]
gene18740	-3.52242	5.01868	-5.12533	1.01e-05	0.00261879	3.32049	LOC101486651	ptpro	protein tyrosine phosphatase%2C receptor type O%2C transcript variant X1	NC_036796.1	13154510	13196723	42214	PTPRO	protein tyrosine phosphatase, receptor type, O [Source:HGNC Symbol;Acc:9678]	protein tyrosine phosphatase, receptor type, O [Source:ZFIN;Acc:ZDB-GENE-070424-54]
gene24863	-2.08819	8.02419	-5.13411	9.88e-06	0.00258613	3.30191	LOC101473127	app	amyloid beta precursor protein%2C transcript variant X1	NC_036801.1	36113698	36150107	36410	APP	amyloid beta (A4) precursor protein [Source:HGNC Symbol;Acc:620]	amyloid beta (A4) precursor protein a [Source:ZFIN;Acc:ZDB-GENE-000616-13]
gene15225	-2.33267	6.64108	-5.07368	1.19e-05	0.00282066	3.2452	LOC101470309	LOC101470309	14-3-3 protein epsilon%2C transcript variant X2	NC_036793.1	5360795	5370885	10091	YWHAE	tyrosine 3-monooxygenase/tryptophan 5-monooxygenase activation protein, epsilon polypeptide [Source:HGNC Symbol;Acc:12851]	tyrosine 3-monooxygenase/tryptophan 5-monooxygenase activation protein, epsilon polypeptide 1 [Source:ZFIN;Acc:ZDB-GENE-030131-779]
gene1989	-3.28861	3.90339	-5.08047	1.16e-05	0.00282066	3.22064	LOC101474283	LOC101474283	tripartite motif-containing protein 2	NC_036782.1	1707465	1727704	20240	TRIM2	tripartite motif containing 2 [Source:HGNC Symbol;Acc:15974]	tripartite motif-containing 2b [Source:ZFIN;Acc:ZDB-GENE-090312-70]
gene19109	-3.34164	3.54483	-5.07004	1.2e-05	0.00282066	3.21038	LOC101463962	nampt	nicotinamide phosphoribosyltransferase	NC_036796.1	27300960	27323991	23032	NAMPT	nicotinamide phosphoribosyltransferase [Source:HGNC Symbol;Acc:30092]	Uncharacterized protein [Source:UniProtKB/TrEMBL;Acc:E7F8T6]
gene23840	-3.76826	5.24365	-5.08102	1.16e-05	0.00282066	3.20597	LOC101474979	LOC101474979	cytochrome b-c1 complex subunit 6%2C mitochondrial	NC_036801.1	2509722	2512842	3121	UQCRH	ubiquinol-cytochrome c reductase hinge protein [Source:HGNC Symbol;Acc:12590]	ubiquinol-cytochrome c reductase hinge protein [Source:ZFIN;Acc:ZDB-GENE-051030-93]
gene16462	-1.61972	8.13649	-5.09928	1.1e-05	0.00279671	3.16939	LOC101466091	chga	chromogranin A	NC_036794.1	5683583	5690855	7273	CHGA	chromogranin A (parathyroid secretory protein 1) [Source:HGNC Symbol;Acc:1929]	chromogranin A [Source:ZFIN;Acc:ZDB-GENE-041010-161]
gene10926	-1.80963	7.71044	-5.07612	1.18e-05	0.00282066	3.14924	LOC101474029	LOC101474029	vesicle-associated membrane protein 2	NC_036789.1	10076158	10086017	9860	VAMP2	vesicle-associated membrane protein 2 (synaptobrevin 2) [Source:HGNC Symbol;Acc:12643]	vesicle-associated membrane protein 2 [Source:ZFIN;Acc:ZDB-GENE-030131-8225]
gene1027	-3.23798	3.58139	-5.04981	1.28e-05	0.00295999	3.14822	LOC101486075	hars	histidyl-tRNA synthetase%2C transcript variant X3	NC_036781.1	793475	818073	24599	HARS	histidyl-tRNA synthetase [Source:HGNC Symbol;Acc:4816]	histidyl-tRNA synthetase [Source:ZFIN;Acc:ZDB-GENE-040912-152]
gene22150	-2.0681	7.42983	-5.04594	1.29e-05	0.00295999	3.0952	LOC101470284	LOC101470284	synaptotagmin-2%2C transcript variant X1	NC_036799.1	20294797	20361491	66695	SYT2	synaptotagmin II [Source:HGNC Symbol;Acc:11510]	synaptotagmin IIa [Source:ZFIN;Acc:ZDB-GENE-060503-315]
gene4212	-2.58259	6.29445	-5.01249	1.43e-05	0.00315935	3.08559	LOC101474304	ezh1	enhancer of zeste 1 polycomb repressive complex 2 subunit%2C transcript variant X1	NC_036783.1	21768666	21780818	12153	EZH1	enhancer of zeste homolog 1 (Drosophila) [Source:HGNC Symbol;Acc:3526]	enhancer of zeste homolog 2 (Drosophila) [Source:ZFIN;Acc:ZDB-GENE-041111-259]
gene5316	-3.24419	3.8726	-5.02188	1.39e-05	0.00314201	3.0594	LOC101487059	LOC101487059	guanine nucleotide-binding protein G(I)/G(S)/G(T) subunit beta-1%2C transcript variant X1	NC_036784.1	20874338	20885219	10882	GNB1	guanine nucleotide binding protein (G protein), beta polypeptide 1 [Source:HGNC Symbol;Acc:4396]	guanine nucleotide binding protein (G protein), beta polypeptide 1b [Source:ZFIN;Acc:ZDB-GENE-040426-2855]
gene26686	-2.99704	2.78894	-5.01829	1.41e-05	0.00314201	3.05522	LOC101466459	sema3g	semaphorin 3G%2C transcript variant X1	NW_020192407.1	54207	121291	67085	SEMA3E	sema domain, immunoglobulin domain (Ig), short basic domain, secreted, (semaphorin) 3E [Source:HGNC Symbol;Acc:10727]	sema domain, immunoglobulin domain (Ig), short basic domain, secreted, (semaphorin) 3bl [Source:ZFIN;Acc:ZDB-GENE-030131-2956]
gene24856	-2.66224	5.99326	-4.99308	1.52e-05	0.00327833	3.03084	LOC101471568	LOC101471568	FUN14 domain-containing protein 1%2C transcript variant X1	NC_036801.1	35658506	35663208	4703	FUNDC1	FUN14 domain containing 1 [Source:HGNC Symbol;Acc:28746]	FUN14 domain containing 1 [Source:ZFIN;Acc:ZDB-GENE-040718-466]
gene19558	-3.75662	3.78345	-4.9903	1.53e-05	0.00327833	2.99649	LOC101466258	pex19	peroxisomal biogenesis factor 19	NC_036797.1	6125606	6130823	5218	PEX19	peroxisomal biogenesis factor 19 [Source:HGNC Symbol;Acc:9713]	peroxisomal biogenesis factor 19 [Source:ZFIN;Acc:ZDB-GENE-050417-424]
gene16089	-3.06407	5.25453	-4.98867	1.54e-05	0.00327833	2.97535	LOC101474093	LOC101474093	uncharacterized LOC101474093	NC_036793.1	32348939	32366791	17853	NA	NA	NA
gene2413	-3.0566	2.79572	-4.98423	1.56e-05	0.0032845	2.96227	LOC101470997	ankrd46	ankyrin repeat domain 46	NC_036782.1	12791656	12799443	7788	ANKRD46	ankyrin repeat domain 46 [Source:HGNC Symbol;Acc:27229]	ankyrin repeat domain 46b [Source:ZFIN;Acc:ZDB-GENE-050114-7]
gene10036	-2.34987	6.56582	-4.9632	1.67e-05	0.00345303	2.93136	LOC101463783	LOC101463783	microtubule-associated protein tau%2C transcript variant X2	NC_036787.1	21379922	21418438	38517	MAPT	microtubule-associated protein tau [Source:HGNC Symbol;Acc:6893]	microtubule-associated protein tau [Source:HGNC Symbol;Acc:6893]
gene25694	-3.00555	2.7749	-4.94424	1.77e-05	0.00354675	2.85165	LOC101481987	suds3	SDS3 homolog%2C SIN3A corepressor complex component%2C transcript variant X1	NW_020192346.1	165250	175152	9903	SUDS3	suppressor of defective silencing 3 homolog (S. cerevisiae) [Source:HGNC Symbol;Acc:29545]	suppressor of defective silencing 3 homolog (SDS3, S. cerevisiae) [Source:ZFIN;Acc:ZDB-GENE-040801-236]
gene5353	-2.68529	6.1549	-4.92924	1.85e-05	0.00363236	2.85116	LOC101477164	stau1	staufen double-stranded RNA binding protein 1%2C transcript variant X1	NC_036784.1	21579834	21588703	8870	STAU1	staufen, RNA binding protein, homolog 1 (Drosophila) [Source:HGNC Symbol;Acc:11370]	staufen, RNA binding protein, homolog 1 (Drosophila) [Source:ZFIN;Acc:ZDB-GENE-030131-6372]
gene8171	-3.26216	4.11529	-4.93976	1.79e-05	0.00355614	2.82663	LOC101481186	LOC101481186	spindlin-1%2C transcript variant X2	NC_036786.1	29976015	29994224	18210	SPIN1	spindlin 1 [Source:HGNC Symbol;Acc:11243]	spindlin 1 [Source:HGNC Symbol;Acc:11243]
gene12434	-1.71386	7.58709	-4.96035	1.68e-05	0.00345303	2.81432	LOC101482701	clstn3	calsyntenin 3%2C transcript variant X1	NC_036790.1	19275986	19306044	30059	CLSTN3	calsyntenin 3 [Source:HGNC Symbol;Acc:18371]	calsyntenin 3 [Source:ZFIN;Acc:ZDB-GENE-100921-73]
gene20746	-1.79753	7.38403	-4.94921	1.74e-05	0.0035325	2.80463	LOC101482160	LOC101482160	calmodulin	NC_036798.1	10823880	10831931	8052	CALM2	calmodulin 2 (phosphorylase kinase, delta) [Source:HGNC Symbol;Acc:1445]	calmodulin 3b (phosphorylase kinase, delta) [Source:ZFIN;Acc:ZDB-GENE-030131-527]
gene25985	-3.08972	2.8179	-4.91623	1.92e-05	0.00367199	2.77725	LOC101476764	stat1	signal transducer and activator of transcription 1%2C transcript variant X1	NW_020192362.1	202422	220218	17797	STAT1	signal transducer and activator of transcription 1, 91kDa [Source:HGNC Symbol;Acc:11362]	signal transduction and activation of transcription 1a [Source:ZFIN;Acc:ZDB-GENE-980526-499]
gene17190	-2.97414	2.74592	-4.91519	1.93e-05	0.00367199	2.77064	LOC101463777	LOC101463777	phosphatidylinositol 3-kinase regulatory subunit gamma%2C transcript variant X2	NC_036794.1	28147571	28159768	12198	PIK3R2	phosphoinositide-3-kinase, regulatory subunit 2 (beta) [Source:HGNC Symbol;Acc:8980]	phosphoinositide-3-kinase, regulatory subunit, polypeptide 2 [Source:ZFIN;Acc:ZDB-GENE-040309-1]
gene1284	-2.59767	5.6808	-4.87635	2.17e-05	0.00396711	2.69757	LOC101482059	LOC101482059	traf2 and NCK-interacting protein kinase%2C transcript variant X1	NC_036781.1	15046868	15104189	57322	MAP4K4	mitogen-activated protein kinase kinase kinase kinase 4 [Source:HGNC Symbol;Acc:6866]	Uncharacterized protein; Uncharacterized protein [Source:UniProtKB/TrEMBL;Acc:E7FF03]
gene1535	-1.69352	7.36859	-4.90484	1.99e-05	0.00375032	2.67351	LOC101464081	LOC101464081	gamma-aminobutyric acid receptor subunit beta-2%2C transcript variant X1	NC_036781.1	22333724	22366868	33145	GABRB2	gamma-aminobutyric acid (GABA) A receptor, beta 2 [Source:HGNC Symbol;Acc:4082]	gamma-aminobutyric acid (GABA) A receptor, beta 2 [Source:ZFIN;Acc:ZDB-GENE-030131-8196]
gene22114	-3.62358	5.01546	-4.88588	2.11e-05	0.00393288	2.66965	LOC101482393	ptges3	prostaglandin E synthase 3	NC_036799.1	19226730	19232146	5417	PTGES3	prostaglandin E synthase 3 (cytosolic) [Source:HGNC Symbol;Acc:16049]	prostaglandin E synthase 3b (cytosolic) [Source:ZFIN;Acc:ZDB-GENE-040625-144]
gene27158	-3.13307	3.60614	-4.86491	2.25e-05	0.00405767	2.63685	LOC112429855	LOC112429855	beta-1%2C4-galactosyltransferase 2-like	NW_020192442.1	365451	389060	23610	B4GALT2	UDP-Gal:betaGlcNAc beta 1,4- galactosyltransferase, polypeptide 2 [Source:HGNC Symbol;Acc:925]	UDP-Gal:betaGlcNAc beta 1,4- galactosyltransferase, polypeptide 2 [Source:ZFIN;Acc:ZDB-GENE-070912-258]
gene3431	-2.94338	2.75636	-4.8558	2.31e-05	0.00405767	2.60906	LOC101482975	LOC101482975	zinc finger protein 646%2C transcript variant X1	NC_036783.1	4157913	4171156	13244	NA	NA	zinc finger protein 646 [Source:HGNC Symbol;Acc:29004]
gene9119	-1.50301	8.34838	-4.91813	1.91e-05	0.00367199	2.60671	LOC101479290	ndrg4	NDRG family member 4%2C transcript variant X1	NC_036786.1	61544175	61612432	68258	NDRG4	NDRG family member 4 [Source:HGNC Symbol;Acc:14466]	N-myc downstream regulated gene 4 [Source:ZFIN;Acc:ZDB-GENE-060512-226]
gene5958	-3.16645	3.62394	-4.85227	2.34e-05	0.00405767	2.60281	LOC101485448	stx10	syntaxin 10	NC_036785.1	5084573	5097988	13416	STX10	syntaxin 10 [Source:HGNC Symbol;Acc:11428]	Uncharacterized protein [Source:UniProtKB/TrEMBL;Acc:E7EXN4]
gene21954	-1.8514	7.41801	-4.87749	2.17e-05	0.00396711	2.59341	LOC101477303	LOC101477303	rab GDP dissociation inhibitor alpha	NC_036799.1	15436869	15445310	8442	GDI1	GDP dissociation inhibitor 1 [Source:HGNC Symbol;Acc:4226]	GDP dissociation inhibitor 1 [Source:ZFIN;Acc:ZDB-GENE-050522-504]
gene18025	-3.06846	2.77649	-4.84965	2.36e-05	0.00405767	2.59326	LOC101479826	LOC101479826	small ubiquitin-related modifier 3	NC_036795.1	19589999	19595911	5913	SUMO3	SMT3 suppressor of mif two 3 homolog 3 (S. cerevisiae) [Source:HGNC Symbol;Acc:11124]	SMT3 suppressor of mif two 3 homolog 3b [Source:ZFIN;Acc:ZDB-GENE-040718-426]
gene6266	-2.89223	6.24922	-4.83542	2.46e-05	0.00414211	2.58681	LOC101482997	LOC101482997	endophilin-A1%2C transcript variant X1	NC_036785.1	15693942	15732572	38631	SH3GL2	SH3-domain GRB2-like 2 [Source:HGNC Symbol;Acc:10831]	SH3-domain GRB2-like 2 [Source:ZFIN;Acc:ZDB-GENE-040121-3]
gene23371	-3.37496	4.12879	-4.85011	2.35e-05	0.00405767	2.5833	LOC101483171	sem1	SEM1%2C 26S proteasome complex subunit	NC_036800.1	19957854	19960444	2591	SHFM1	split hand/foot malformation (ectrodactyly) type 1 [Source:HGNC Symbol;Acc:10845]	split hand/foot malformation (ectrodactyly) type 1 [Source:ZFIN;Acc:ZDB-GENE-030131-988]
gene7480	-2.46973	6.0621	-4.83365	2.48e-05	0.00414211	2.58087	LOC101476438	LOC101476438	protein piccolo%2C transcript variant X1	NC_036786.1	9983907	10045471	61565	PCLO	piccolo presynaptic cytomatrix protein [Source:HGNC Symbol;Acc:13406]	piccolo (presynaptic cytomatrix protein) b [Source:ZFIN;Acc:ZDB-GENE-030131-8100]
gene5317	-2.41956	6.57197	-4.8222	2.56e-05	0.00420229	2.53006	LOC101487819	LOC101487819	TAR DNA-binding protein 43%2C transcript variant X1	NC_036784.1	20886603	20890367	3765	TARDBP	TAR DNA binding protein [Source:HGNC Symbol;Acc:11571]	TAR DNA binding protein [Source:ZFIN;Acc:ZDB-GENE-030131-3777]
gene3772	-1.68215	7.23648	-4.85025	2.35e-05	0.00405767	2.52485	LOC101481442	sez6l2	seizure related 6 homolog like 2%2C transcript variant X1	NC_036783.1	12318877	12337222	18346	SEZ6L2	seizure related 6 homolog (mouse)-like 2 [Source:HGNC Symbol;Acc:30844]	seizure related 6 homolog like 2 [Source:ZFIN;Acc:ZDB-GENE-091204-189]
gene15266	-2.84319	2.67387	-4.81992	2.58e-05	0.00420229	2.5071	LOC101483896	fbxo46	F-box protein 46	NC_036793.1	7097312	7107889	10578	FBXO46	F-box protein 46 [Source:HGNC Symbol;Acc:25069]	F-box protein 46 [Source:HGNC Symbol;Acc:25069]
gene20546	-2.76609	5.65811	-4.80421	2.71e-05	0.00425488	2.49391	LOC101468208	eif5	eukaryotic translation initiation factor 5%2C transcript variant X2	NC_036798.1	4971291	4980067	8777	EIF5	eukaryotic translation initiation factor 5 [Source:HGNC Symbol;Acc:3299]	eukaryotic translation initiation factor 5 [Source:ZFIN;Acc:ZDB-GENE-030131-975]
gene1656	-2.1425	7.61534	-4.84415	2.4e-05	0.00408731	2.48878	LOC105940793	LOC105940793	protocadherin gamma-A11	NC_036781.1	24837645	25080196	242552	PCDHAC1	protocadherin alpha subfamily C, 1 [Source:HGNC Symbol;Acc:8676]	Uncharacterized protein [Source:UniProtKB/TrEMBL;Acc:F1Q862]
gene21449	-3.32905	4.16491	-4.81128	2.65e-05	0.00423792	2.47865	LOC101474710	copz1	coatomer protein complex subunit zeta 1	NC_036799.1	1922434	1927146	4713	COPZ1	coatomer protein complex, subunit zeta 1 [Source:HGNC Symbol;Acc:2243]	coatomer protein complex, subunit zeta 1 [Source:ZFIN;Acc:ZDB-GENE-000406-6]
gene19587	-2.99032	2.77042	-4.80736	2.68e-05	0.00425126	2.47763	LOC101473837	rabggtb	Rab geranylgeranyltransferase beta subunit%2C transcript variant X1	NC_036797.1	6527151	6531766	4616	RABGGTB	Rab geranylgeranyltransferase, beta subunit [Source:HGNC Symbol;Acc:9796]	Rab geranylgeranyltransferase, beta subunit [Source:ZFIN;Acc:ZDB-GENE-040426-2116]
gene11438	-1.95552	6.92791	-4.81683	2.61e-05	0.0042042	2.46701	LOC101485572	LOC101485572	dihydropyrimidinase-related protein 3%2C transcript variant X1	NC_036789.1	21095857	21132183	36327	DPYSL3	dihydropyrimidinase-like 3 [Source:HGNC Symbol;Acc:3015]	dihydropyrimidinase-like 3 [Source:ZFIN;Acc:ZDB-GENE-050720-2]
gene6484	-2.51388	6.63183	-4.7787	2.93e-05	0.00448138	2.403	LOC101480456	2018-09-03	septin 3%2C transcript variant X1	NC_036785.1	21981545	22000559	19015	2018-09-03	septin 3 [Source:HGNC Symbol;Acc:10750]	septin 3 [Source:ZFIN;Acc:ZDB-GENE-050522-375]
gene4325	-3.13427	3.99573	-4.78112	2.91e-05	0.00448138	2.39346	LOC101469387	ccdc47	coiled-coil domain containing 47	NC_036783.1	24640867	24649838	8972	CCDC47	coiled-coil domain containing 47 [Source:HGNC Symbol;Acc:24856]	coiled-coil domain containing 47 [Source:ZFIN;Acc:ZDB-GENE-040912-15]
gene5564	-2.97129	2.73635	-4.76731	3.03e-05	0.00458652	2.36706	LOC101481524	LOC101481524	metabotropic glutamate receptor 4%2C transcript variant X1	NC_036784.1	28311914	28522896	210983	GRM4	glutamate receptor, metabotropic 4 [Source:HGNC Symbol;Acc:4596]	glutamate receptor, metabotropic 4 [Source:HGNC Symbol;Acc:4596]
gene12085	-3.40544	4.55246	-4.76555	3.05e-05	0.00458652	2.34085	LOC101480256	emc2	ER membrane protein complex subunit 2	NC_036790.1	12332151	12356397	24247	EMC2	ER membrane protein complex subunit 2 [Source:HGNC Symbol;Acc:28963]	ER membrane protein complex subunit 2 [Source:ZFIN;Acc:ZDB-GENE-040625-82]
gene2959	3.2937	1.25747	4.78636	2.86e-05	0.00445371	2.32739	LOC112430176	LOC112430176	uncharacterized LOC112430176	NC_036782.1	26890862	26891317	456	NA	NA	NA
gene8846	-3.20433	4.02135	-4.75448	3.15e-05	0.00466368	2.32195	LOC101486468	LOC101486468	kinesin-like protein KIF2A%2C transcript variant X1	NC_036786.1	53810294	53833895	23602	KIF2A	kinesin heavy chain member 2A [Source:HGNC Symbol;Acc:6318]	Uncharacterized protein [Source:UniProtKB/TrEMBL;Acc:H9GXL0]
gene14310	-2.8774	6.29008	-4.73416	3.35e-05	0.0048215	2.29962	LOC101468584	LOC101468584	pyridoxal kinase	NC_036792.1	3719734	3744922	25189	PDXK	pyridoxal (pyridoxine, vitamin B6) kinase [Source:HGNC Symbol;Acc:8819]	pyridoxal (pyridoxine, vitamin B6) kinase b [Source:ZFIN;Acc:ZDB-GENE-030616-521]
gene22021	-1.97987	6.83619	-4.75194	3.17e-05	0.00466368	2.28941	LOC101468055	LOC101468055	14-3-3 protein beta/alpha%2C transcript variant X2	NC_036799.1	16840025	16844612	4588	YWHAB	tyrosine 3-monooxygenase/tryptophan 5-monooxygenase activation protein, beta polypeptide [Source:HGNC Symbol;Acc:12849]	tyrosine 3-monooxygenase/tryptophan 5-monooxygenase activation protein, beta polypeptide a [Source:ZFIN;Acc:ZDB-GENE-030131-6583]
gene5434	-2.1027	7.32338	-4.75561	3.14e-05	0.00466368	2.25981	LOC101484489	LOC101484489	14-3-3 protein beta/alpha-A	NC_036784.1	23485825	23511186	25362	YWHAB	tyrosine 3-monooxygenase/tryptophan 5-monooxygenase activation protein, beta polypeptide [Source:HGNC Symbol;Acc:12849]	tyrosine 3-monooxygenase/tryptophan 5-monooxygenase activation protein, beta polypeptide a [Source:ZFIN;Acc:ZDB-GENE-030131-6583]
gene22875	-3.05268	3.59569	-4.7199	3.5e-05	0.00489449	2.24116	LOC101477249	LOC101477249	zinc finger and BTB domain-containing protein 22%2C transcript variant X1	NC_036800.1	8139143	8144082	4940	ZBTB43	zinc finger and BTB domain containing 43 [Source:HGNC Symbol;Acc:17908]	zinc finger and BTB domain containing 26 [Source:HGNC Symbol;Acc:23383]
gene8842	-1.78222	6.91619	-4.74009	3.29e-05	0.00479562	2.24003	LOC101467340	LOC101467340	heterogeneous nuclear ribonucleoprotein D0%2C transcript variant X1	NC_036786.1	53657980	53667518	9539	HNRNPD	heterogeneous nuclear ribonucleoprotein D (AU-rich element RNA binding protein 1, 37kDa) [Source:HGNC Symbol;Acc:5036]	heterogeneous nuclear ribonucleoprotein D [Source:ZFIN;Acc:ZDB-GENE-070424-97]
gene4442	-3.02694	3.55132	-4.71942	3.5e-05	0.00489449	2.2388	LOC101484066	LOC101484066	ataxin-2-like protein	NC_036783.1	28100670	28110170	9501	ATXN2L	ataxin 2-like [Source:HGNC Symbol;Acc:31326]	ataxin 2-like [Source:ZFIN;Acc:ZDB-GENE-030131-3246]
gene23382	-3.01433	2.79584	-4.71781	3.52e-05	0.00489449	2.23492	LOC101477726	tra2a	transformer 2 alpha homolog	NC_036800.1	20086572	20093089	6518	TRA2A	transformer 2 alpha homolog (Drosophila) [Source:HGNC Symbol;Acc:16645]	transformer 2 beta homolog (Drosophila) [Source:ZFIN;Acc:ZDB-GENE-040426-1094]
gene13214	-3.16291	4.41568	-4.71906	3.51e-05	0.00489449	2.21358	LOC101484745	LOC101484745	E3 ubiquitin-protein ligase DTX1%2C transcript variant X3	NC_036791.1	10941026	10988782	47757	DTX1	deltex homolog 1 (Drosophila) [Source:HGNC Symbol;Acc:3060]	deltex homolog 1 (Drosophila) [Source:HGNC Symbol;Acc:3060]
gene16307	-1.26382	9.97974	-4.82411	2.55e-05	0.00420229	2.14683	LOC101478080	snap25	synaptosome associated protein 25	NC_036794.1	111270	146625	35356	SNAP25	synaptosomal-associated protein, 25kDa [Source:HGNC Symbol;Acc:11132]	synaptosome-associated protein 25a [Source:ZFIN;Acc:ZDB-GENE-980526-468]
gene20170	-1.96708	6.93815	-4.70394	3.67e-05	0.00506594	2.14277	LOC101463593	LOC101463593	dynamin-3%2C transcript variant X1	NC_036797.1	20579555	20602299	22745	DNM3	dynamin 3 [Source:HGNC Symbol;Acc:29125]	dynamin 3 [Source:ZFIN;Acc:ZDB-GENE-040724-76]
gene15907	-2.84647	2.6713	-4.68271	3.92e-05	0.00525864	2.13462	LOC101486430	LOC101486430	nectin-3-like protein%2C transcript variant X1	NC_036793.1	26560160	26596239	36080	PVRL3	poliovirus receptor-related 3 [Source:HGNC Symbol;Acc:17664]	Uncharacterized protein [Source:UniProtKB/TrEMBL;Acc:E7EXR1]
gene15211	-2.17966	6.70932	-4.69021	3.83e-05	0.00520193	2.1318	LOC101476355	fam131a	family with sequence similarity 131 member A%2C transcript variant X4	NC_036793.1	4404949	4427999	23051	FAM131A	family with sequence similarity 131, member A [Source:HGNC Symbol;Acc:28308]	family with sequence similarity 131, member A [Source:HGNC Symbol;Acc:28308]
gene5235	-2.40769	6.95111	-4.68171	3.93e-05	0.00525864	2.09646	LOC101464682	atp2b2	ATPase plasma membrane Ca2+ transporting 2%2C transcript variant X9	NC_036784.1	18849643	18976633	126991	ATP2B2	ATPase, Ca++ transporting, plasma membrane 2 [Source:HGNC Symbol;Acc:815]	ATPase, Ca++ transporting, plasma membrane 2 [Source:ZFIN;Acc:ZDB-GENE-061016-1]
gene4973	-2.88915	2.70055	-4.66484	4.14e-05	0.00545358	2.08747	LOC101476501	tmem183a	transmembrane protein 183A%2C transcript variant X1	NC_036784.1	13575344	13582383	7040	TMEM183A	transmembrane protein 183A [Source:HGNC Symbol;Acc:20173]	transmembrane protein 183A [Source:ZFIN;Acc:ZDB-GENE-050327-5]
gene10592	-1.86591	7.18749	-4.6947	3.78e-05	0.00517036	2.08641	LOC101487744	nebl	nebulette%2C transcript variant X1	NC_036788.1	19485031	19611373	126343	NEBL	nebulette [Source:HGNC Symbol;Acc:16932]	LIM and SH3 protein 1 [Source:ZFIN;Acc:ZDB-GENE-030131-1936]
gene159	-1.4125	8.49336	-4.73305	3.36e-05	0.0048215	2.04303	LOC101468238	LOC101468238	synaptosomal-associated protein 25-B%2C transcript variant X2	NC_036780.1	7210582	7252270	41689	SNAP25	synaptosomal-associated protein, 25kDa [Source:HGNC Symbol;Acc:11132]	synaptosome-associated protein 25a [Source:ZFIN;Acc:ZDB-GENE-980526-468]
gene3927	-2.96534	3.33713	-4.64387	4.41e-05	0.00572765	2.03679	LOC101486233	LOC101486233	cytohesin-3	NC_036783.1	15911059	15953125	42067	CYTH3	cytohesin 3 [Source:HGNC Symbol;Acc:9504]	cytohesin 3 [Source:HGNC Symbol;Acc:9504]
gene6444	-2.07368	6.51723	-4.65159	4.3e-05	0.00563591	2.03145	LOC101485216	smim18	small integral membrane protein 18	NC_036785.1	20798511	20801779	3269	NA	NA	NA
gene10952	-2.92195	3.32501	-4.62224	4.7e-05	0.00594703	1.97779	LOC101485265	LOC101485265	rho GTPase-activating protein 35%2C transcript variant X1	NC_036789.1	10756320	10766350	10031	ARHGAP35	Rho GTPase activating protein 35 [Source:HGNC Symbol;Acc:4591]	Rho GTPase activating protein 35b [Source:ZFIN;Acc:ZDB-GENE-060526-44]
gene8477	-2.90693	2.7121	-4.6234	4.69e-05	0.00594703	1.97579	LOC101481389	LOC101481389	V-type proton ATPase 116 kDa subunit a	NC_036786.1	42120591	42133569	12979	ATP6V0A2	ATPase, H+ transporting, lysosomal V0 subunit a2 [Source:HGNC Symbol;Acc:18481]	ATPase, H+ transporting, lysosomal V0 subunit a2a [Source:ZFIN;Acc:ZDB-GENE-091113-4]
gene12342	-2.77741	5.49582	-4.61755	4.77e-05	0.00594703	1.97517	LOC101477794	rps9	ribosomal protein S9	NC_036790.1	18018559	18020866	2308	RPS9	ribosomal protein S9 [Source:HGNC Symbol;Acc:10442]	ribosomal protein S9 [Source:ZFIN;Acc:ZDB-GENE-010724-15]
gene17268	-3.01355	3.7386	-4.61625	4.79e-05	0.00594703	1.95346	LOC101480606	psmd1	proteasome 26S subunit%2C non-ATPase 1	NC_036794.1	31009049	31045959	36911	PSMD1	proteasome (prosome, macropain) 26S subunit, non-ATPase, 1 [Source:HGNC Symbol;Acc:9554]	proteasome (prosome, macropain) 26S subunit, non-ATPase, 1 [Source:ZFIN;Acc:ZDB-GENE-040426-810]
gene9512	-3.03271	3.40015	-4.60695	4.93e-05	0.00601486	1.93788	LOC101463568	pdpk1	3-phosphoinositide dependent protein kinase 1%2C transcript variant X3	NC_036787.1	8546205	8554536	8332	PDPK1	3-phosphoinositide dependent protein kinase-1 [Source:HGNC Symbol;Acc:8816]	3-phosphoinositide dependent protein kinase-1b [Source:ZFIN;Acc:ZDB-GENE-040426-1820]
gene101	-3.09868	3.62657	-4.60051	5.02e-05	0.00605305	1.9177	LOC101482947	slc7a6os	solute carrier family 7 member 6 opposite strand	NC_036780.1	4383677	4392003	8327	SLC7A6OS	solute carrier family 7, member 6 opposite strand [Source:HGNC Symbol;Acc:25807]	solute carrier family 7, member 6 opposite strand [Source:ZFIN;Acc:ZDB-GENE-041114-32]
gene23154	-2.0147	6.57248	-4.61295	4.84e-05	0.00594703	1.91694	LOC101471655	LOC101471655	polyadenylate-binding protein 1	NC_036800.1	15079390	15085926	6537	PABPC1	poly(A) binding protein, cytoplasmic 1 [Source:HGNC Symbol;Acc:8554]	poly A binding protein, cytoplasmic 1 a [Source:ZFIN;Acc:ZDB-GENE-030131-3238]
gene2931	-1.45632	7.88105	-4.66586	4.12e-05	0.00545358	1.91214	LOC101484991	ptprd	protein tyrosine phosphatase%2C receptor type D%2C transcript variant X1	NC_036782.1	25196106	25610892	414787	PTPRD	protein tyrosine phosphatase, receptor type, D [Source:HGNC Symbol;Acc:9668]	Uncharacterized protein [Source:UniProtKB/TrEMBL;Acc:E7F4G9]
gene7332	-3.1977	3.6752	-4.59228	5.15e-05	0.00610086	1.89622	LOC101474340	LOC101474340	L-lactate dehydrogenase A chain	NC_036786.1	5884875	5890099	5225	LDHA	lactate dehydrogenase A [Source:HGNC Symbol;Acc:6535]	lactate dehydrogenase A4 [Source:ZFIN;Acc:ZDB-GENE-991026-5]
gene14620	-3.06498	3.40161	-4.59067	5.18e-05	0.00610086	1.89372	LOC101476430	LOC101476430	leucine zipper putative tumor suppressor 2 homolog	NC_036792.1	15923966	15968444	44479	LZTS2	leucine zipper, putative tumor suppressor 2 [Source:HGNC Symbol;Acc:29381]	leucine zipper, putative tumor suppressor 2a [Source:ZFIN;Acc:ZDB-GENE-090313-276]
gene21940	-3.01101	3.57022	-4.58912	5.2e-05	0.00610086	1.88582	LOC101483800	tshz2	teashirt zinc finger homeobox 2%2C transcript variant X1	NC_036799.1	15100343	15139864	39522	TSHZ2	teashirt zinc finger homeobox 2 [Source:HGNC Symbol;Acc:13010]	Uncharacterized protein [Source:UniProtKB/TrEMBL;Acc:F1QV43]
gene27392	-2.29075	6.13757	-4.58696	5.23e-05	0.00610086	1.88039	LOC101479525	LOC101479525	uncharacterized LOC101479525%2C transcript variant X1	NW_020192463.1	65032	148518	83487	PALMD	palmdelphin [Source:HGNC Symbol;Acc:15846]	palmdelphin b [Source:ZFIN;Acc:ZDB-GENE-090713-3]
gene18700	-2.5143	6.20034	-4.58483	5.27e-05	0.00610091	1.87704	LOC105941354	LOC105941354	prothymosin alpha-A	NC_036796.1	12167323	12182264	14942	PTMA	prothymosin, alpha [Source:HGNC Symbol;Acc:9623]	prothymosin, alpha a [Source:ZFIN;Acc:ZDB-GENE-030131-7647]
gene331	-2.84457	2.68025	-4.58235	5.31e-05	0.00610765	1.86375	LOC101480723	kctd3	potassium channel tetramerization domain containing 3	NC_036780.1	14043508	14055330	11823	KCTD3	potassium channel tetramerisation domain containing 3 [Source:HGNC Symbol;Acc:21305]	potassium channel tetramerisation domain containing 3 [Source:ZFIN;Acc:ZDB-GENE-060503-169]
gene25075	-1.62585	7.17771	-4.62029	4.73e-05	0.00594703	1.86046	LOC101471641	pip4k2a	phosphatidylinositol-5-phosphate 4-kinase type 2 alpha%2C transcript variant X1	NW_020192319.1	210336	238846	28511	PIP4K2A	phosphatidylinositol-5-phosphate 4-kinase, type II, alpha [Source:HGNC Symbol;Acc:8997]	phosphatidylinositol-5-phosphate 4-kinase, type II, alpha a [Source:ZFIN;Acc:ZDB-GENE-080721-18]
gene14690	-2.9843	3.69859	-4.58024	5.34e-05	0.00610765	1.85561	LOC101474868	LOC101474868	ubiquitin domain-containing protein 1%2C transcript variant X2	NC_036792.1	17561627	17568667	7041	UBTD1	ubiquitin domain containing 1 [Source:HGNC Symbol;Acc:25683]	ubiquitin domain containing 1a [Source:ZFIN;Acc:ZDB-GENE-070424-93]
gene745	-2.48199	5.77504	-4.56785	5.54e-05	0.00617272	1.84075	LOC101472295	myef2	myelin expression factor 2	NC_036780.1	27145955	27157384	11430	MYEF2	myelin expression factor 2 [Source:HGNC Symbol;Acc:17940]	myelin expression factor 2 [Source:ZFIN;Acc:ZDB-GENE-051120-114]
gene12818	-3.14381	5.06205	-4.5743	5.44e-05	0.00614043	1.83703	LOC101467345	LOC101467345	membrane progestin receptor delta%2C transcript variant X2	NC_036790.1	30116546	30147081	30536	PAQR6	progestin and adipoQ receptor family member VI [Source:HGNC Symbol;Acc:30132]	progestin and adipoQ receptor family member VI [Source:ZFIN;Acc:ZDB-GENE-090714-1]
gene13484	-2.74526	2.63985	-4.5657	5.58e-05	0.00617272	1.81743	LOC101464558	LOC101464558	leucyl-cystinyl aminopeptidase	NC_036791.1	17334562	17352911	18350	LNPEP	leucyl/cystinyl aminopeptidase [Source:HGNC Symbol;Acc:6656]	leucyl/cystinyl aminopeptidase [Source:ZFIN;Acc:ZDB-GENE-030131-1534]
gene13798	-2.85071	2.67476	-4.55738	5.72e-05	0.00622861	1.79625	LOC101474277	ccdc84	coiled-coil domain containing 84	NC_036791.1	25724239	25729989	5751	CCDC84	coiled-coil domain containing 84 [Source:HGNC Symbol;Acc:30460]	coiled-coil domain containing 84 [Source:HGNC Symbol;Acc:30460]
gene1940	-2.91459	3.11454	-4.54802	5.89e-05	0.00633058	1.7772	LOC101473813	LOC101473813	eukaryotic translation initiation factor 4E type 2	NC_036782.1	158531	166952	8422	EIF4E2	eukaryotic translation initiation factor 4E family member 2 [Source:HGNC Symbol;Acc:3293]	eukaryotic translation initiation factor 4E family member 2 related sequence 1 [Source:ZFIN;Acc:ZDB-GENE-040426-1728]
gene13049	-2.91895	3.27958	-4.5458	5.93e-05	0.00633548	1.76977	LOC101466204	snrnp27	small nuclear ribonucleoprotein U4/U6.U5 subunit 27	NC_036791.1	4650263	4655249	4987	SNRNP27	small nuclear ribonucleoprotein 27kDa (U4/U6.U5) [Source:HGNC Symbol;Acc:30240]	small nuclear ribonucleoprotein 27 (U4/U6.U5) [Source:ZFIN;Acc:ZDB-GENE-040718-457]
gene9839	-1.67224	7.55727	-4.60042	5.03e-05	0.00605305	1.76595	LOC101469304	LOC101469304	synuclein%2C transcript variant X1	NC_036787.1	16216916	16228290	11375	SNCB	synuclein, beta [Source:HGNC Symbol;Acc:11140]	synuclein, gamma b (breast cancer-specific protein 1) [Source:ZFIN;Acc:ZDB-GENE-050522-235]
gene25047	-1.71649	8.71922	-4.63981	4.46e-05	0.00575707	1.75649	LOC101466144	tmsb4x	thymosin beta 4%2C X-linked	NC_036801.1	41727475	41730024	2550	NA	NA	NA
gene1130	-1.82026	6.69221	-4.56296	5.63e-05	0.00617272	1.75413	LOC101487654	gpm6a	glycoprotein M6A	NC_036781.1	5182641	5203170	20530	GPM6A	glycoprotein M6A [Source:HGNC Symbol;Acc:4460]	glycoprotein M6Aa [Source:ZFIN;Acc:ZDB-GENE-030710-7]
gene8649	-2.7059	2.59042	-4.53749	6.08e-05	0.00642011	1.73973	LOC101488101	klhl8	kelch like family member 8	NC_036786.1	47433613	47447485	13873	KLHL8	kelch-like family member 8 [Source:HGNC Symbol;Acc:18644]	kelch-like 8 (Drosophila) [Source:ZFIN;Acc:ZDB-GENE-070209-226]
gene16024	-1.84594	6.87341	-4.56237	5.64e-05	0.00617272	1.73511	LOC101478143	aplp2	amyloid beta precursor like protein 2%2C transcript variant X1	NC_036793.1	31108590	31160461	51872	APLP2	amyloid beta (A4) precursor-like protein 2 [Source:HGNC Symbol;Acc:598]	amyloid beta (A4) precursor-like protein 2 [Source:ZFIN;Acc:ZDB-GENE-061009-28]
gene6924	-3.24155	4.45699	-4.53852	6.06e-05	0.00642011	1.73112	LOC101468123	LOC101468123	protocadherin-10%2C transcript variant X1	NC_036785.1	32556018	32574506	18489	PCDH10	protocadherin 10 [Source:HGNC Symbol;Acc:13404]	protocadherin 10a [Source:ZFIN;Acc:ZDB-GENE-020731-1]
gene29234	-1.64492	7.67538	-4.58872	5.21e-05	0.00610086	1.71795	LOC101473328	LOC101473328	reticulon-3-B%2C transcript variant X1	NW_020192702.1	45482	73223	27742	RTN3	reticulon 3 [Source:HGNC Symbol;Acc:10469]	reticulon 3 [Source:ZFIN;Acc:ZDB-GENE-030710-5]
gene21688	-3.05359	5.18982	-4.52635	6.28e-05	0.0066007	1.7144	LOC101487176	ubr4	ubiquitin protein ligase E3 component n-recognin 4%2C transcript variant X1	NC_036799.1	7181136	7236078	54943	UBR4	ubiquitin protein ligase E3 component n-recognin 4 [Source:HGNC Symbol;Acc:30313]	ubiquitin protein ligase E3 component n-recognin 4 [Source:ZFIN;Acc:ZDB-GENE-090313-341]
gene3658	-1.52233	8.48053	-4.61518	4.81e-05	0.00594703	1.70345	LOC101470738	actb	actin beta	NC_036783.1	9065293	9069425	4133	ACTB	actin, beta [Source:HGNC Symbol;Acc:132]	actin, beta 2 [Source:ZFIN;Acc:ZDB-GENE-000329-3]
gene11799	-2.76014	2.62121	-4.52073	6.39e-05	0.00664716	1.69583	LOC101471830	LOC101471830	WD repeat-containing protein 26	NC_036790.1	137694	154164	16471	WDR26	WD repeat domain 26 [Source:HGNC Symbol;Acc:21208]	Uncharacterized protein [Source:UniProtKB/TrEMBL;Acc:E7F381]
gene28931	-3.00347	5.57543	-4.51498	6.5e-05	0.00664716	1.6936	LOC101482510	LOC101482510	hexokinase-1%2C transcript variant X1	NW_020192663.1	95694	113025	17332	HK1	hexokinase 1 [Source:HGNC Symbol;Acc:4922]	hexokinase 1 [Source:ZFIN;Acc:ZDB-GENE-040426-2848]
gene19040	-2.86609	3.28538	-4.51694	6.46e-05	0.00664716	1.69193	LOC101478755	copg2	coatomer protein complex subunit gamma 2	NC_036796.1	24132463	24143994	11532	COPG1	coatomer protein complex, subunit gamma 1 [Source:HGNC Symbol;Acc:2236]	coatomer protein complex, subunit gamma 2 [Source:ZFIN;Acc:ZDB-GENE-000208-8]
gene6704	-1.65811	7.60142	-4.57499	5.43e-05	0.00614043	1.68665	LOC101487011	LOC101487011	adhesion G protein-coupled receptor L1%2C transcript variant X1	NC_036785.1	27912400	27939595	27196	LPHN1	latrophilin 1 [Source:HGNC Symbol;Acc:20973]	latrophilin 1 [Source:HGNC Symbol;Acc:20973]
gene6083	-2.75001	2.6314	-4.51582	6.49e-05	0.00664716	1.68297	LOC101467217	cct4	chaperonin containing TCP1 subunit 4	NC_036785.1	8796821	8801691	4871	CCT4	chaperonin containing TCP1, subunit 4 (delta) [Source:HGNC Symbol;Acc:1617]	chaperonin containing TCP1, subunit 4 (delta) [Source:ZFIN;Acc:ZDB-GENE-040426-1421]
gene21232	-2.86286	3.08293	-4.5094	6.61e-05	0.00667479	1.67212	LOC101479091	eml1	echinoderm microtubule associated protein like 1%2C transcript variant X1	NC_036798.1	23419089	23472653	53565	EML1	echinoderm microtubule associated protein like 1 [Source:HGNC Symbol;Acc:3330]	echinoderm microtubule associated protein like 1 [Source:ZFIN;Acc:ZDB-GENE-060929-156]
gene12355	-2.91938	3.28157	-4.50947	6.61e-05	0.00667479	1.6717	LOC101465325	LOC101465325	hepatic leukemia factor%2C transcript variant X1	NC_036790.1	18164119	18173599	9481	DBP	D site of albumin promoter (albumin D-box) binding protein [Source:HGNC Symbol;Acc:2697]	D site of albumin promoter (albumin D-box) binding protein b [Source:ZFIN;Acc:ZDB-GENE-100922-6]
gene4117	-2.47593	5.59122	-4.50359	6.73e-05	0.00668053	1.66513	LOC101468002	cdc37	cell division cycle 37	NC_036783.1	19699420	19704626	5207	CDC37	cell division cycle 37 [Source:HGNC Symbol;Acc:1735]	Uncharacterized protein [Source:UniProtKB/TrEMBL;Acc:E7F2J2]
gene13884	-2.99441	2.7838	-4.50484	6.7e-05	0.00668053	1.65795	LOC101487129	castor1	cytosolic arginine sensor for mTORC1 subunit 1	NC_036791.1	28240893	28263662	22770	GATSL3	GATS protein-like 3 [Source:HGNC Symbol;Acc:34423]	GATS protein-like 2 [Source:ZFIN;Acc:ZDB-GENE-030131-5505]
gene15608	-2.53172	5.70479	-4.49536	6.9e-05	0.00677371	1.6422	LOC101475906	LOC101475906	FXYD domain-containing ion transport regulator 6%2C transcript variant X1	NC_036793.1	19482340	19494674	12335	FXYD6	FXYD domain containing ion transport regulator 6 [Source:HGNC Symbol;Acc:4030]	FXYD domain containing ion transport regulator 6 [Source:ZFIN;Acc:ZDB-GENE-030131-5919]
gene11161	-3.09056	5.31215	-4.49683	6.87e-05	0.00677371	1.63731	LOC101470402	LOC101470402	phosphatidylinositol transfer protein alpha isoform	NC_036789.1	14295699	14314993	19295	PITPNA	phosphatidylinositol transfer protein, alpha [Source:HGNC Symbol;Acc:9001]	phosphatidylinositol transfer protein, alpha b [Source:ZFIN;Acc:ZDB-GENE-110408-51]
gene15884	-1.97734	6.67008	-4.51451	6.51e-05	0.00664716	1.62554	LOC101483393	LOC101483393	14-3-3 protein gamma-B	NC_036793.1	26307091	26313671	6581	YWHAG	tyrosine 3-monooxygenase/tryptophan 5-monooxygenase activation protein, gamma polypeptide [Source:HGNC Symbol;Acc:12852]	3-monooxygenase/tryptophan 5-monooxygenase activation protein, gamma polypeptide 2 [Source:ZFIN;Acc:ZDB-GENE-061023-2]
gene10979	-1.97236	6.33505	-4.50423	6.72e-05	0.00668053	1.62427	LOC101484449	srrt	serrate%2C RNA effector molecule%2C transcript variant X2	NC_036789.1	11194679	11202362	7684	SRRT	serrate RNA effector molecule homolog (Arabidopsis) [Source:HGNC Symbol;Acc:24101]	serrate RNA effector molecule homolog (Arabidopsis) [Source:ZFIN;Acc:ZDB-GENE-020419-13]
gene1637	-2.97102	3.53751	-4.49019	7.01e-05	0.00680582	1.61826	LOC101473198	LOC101473198	F-box/WD repeat-containing protein 11%2C transcript variant X1	NC_036781.1	24451052	24467683	16632	FBXW11	F-box and WD repeat domain containing 11 [Source:HGNC Symbol;Acc:13607]	F-box and WD-40 domain protein 11b [Source:ZFIN;Acc:ZDB-GENE-040426-2903]
gene12270	-2.22169	6.39798	-4.49296	6.95e-05	0.00678579	1.59709	LOC101464749	LOC101464749	uncharacterized LOC101464749	NC_036790.1	16705016	16717366	12351	NACAD	NAC alpha domain containing [Source:HGNC Symbol;Acc:22196]	NAC alpha domain containing [Source:ZFIN;Acc:ZDB-GENE-091020-7]
gene21488	-2.84346	2.69638	-4.48042	7.22e-05	0.00689741	1.58993	LOC101486234	LOC101486234	activin receptor type-1	NC_036799.1	2544782	2555081	10300	ACVRL1	activin A receptor type II-like 1 [Source:HGNC Symbol;Acc:175]	activin A receptor type II-like 1 [Source:ZFIN;Acc:ZDB-GENE-021003-1]
gene587	-2.04694	6.26454	-4.48088	7.21e-05	0.00689741	1.56609	LOC101479771	casc4	cancer susceptibility 4%2C transcript variant X1	NC_036780.1	21939380	21951695	12316	CASC4	cancer susceptibility candidate 4 [Source:HGNC Symbol;Acc:24892]	cancer susceptibility candidate 4 [Source:ZFIN;Acc:ZDB-GENE-091130-1]
gene937	-2.78986	2.63581	-4.46271	7.61e-05	0.00723289	1.54065	LOC101475498	znf319	zinc finger protein 319	NC_036780.1	35232489	35237290	4802	ZNF319	zinc finger protein 319 [Source:HGNC Symbol;Acc:13644]	zinc finger protein 319 [Source:ZFIN;Acc:ZDB-GENE-090406-2]
gene5240	-2.73571	3.01469	-4.46111	7.65e-05	0.00723289	1.54057	LOC101484962	vgll4	vestigial like family member 4%2C transcript variant X1	NC_036784.1	19206170	19249045	42876	VGLL4	vestigial like 4 (Drosophila) [Source:HGNC Symbol;Acc:28966]	vestigial like 4b (Drosophila) [Source:ZFIN;Acc:ZDB-GENE-040426-2445]
gene4225	-2.79693	2.64488	-4.45753	7.73e-05	0.00727307	1.52704	LOC101479892	atp6v0a1	ATPase H+ transporting V0 subunit a1%2C transcript variant X2	NC_036783.1	22036075	22048761	12687	ATP6V0A1	ATPase, H+ transporting, lysosomal V0 subunit a1 [Source:HGNC Symbol;Acc:865]	ATPase, H+ transporting, lysosomal V0 subunit a isoform 1a [Source:ZFIN;Acc:ZDB-GENE-030131-3027]
gene10887	-2.91537	3.13574	-4.44204	8.1e-05	0.00754078	1.49143	LOC101469665	LOC101469665	steroid hormone receptor ERR1%2C transcript variant X3	NC_036789.1	8960591	8974816	14226	ESRRA	estrogen-related receptor alpha [Source:HGNC Symbol;Acc:3471]	estrogen-related receptor alpha [Source:ZFIN;Acc:ZDB-GENE-990415-68]
gene10301	-3.1107	3.80032	-4.44214	8.09e-05	0.00754078	1.48636	LOC101465724	dlgap1	DLG associated protein 1%2C transcript variant X1	NC_036788.1	8129074	8226928	97855	DLGAP1	discs, large (Drosophila) homolog-associated protein 1 [Source:HGNC Symbol;Acc:2905]	discs, large (Drosophila) homolog-associated protein 1b [Source:ZFIN;Acc:ZDB-GENE-091116-98]
gene2976	-1.27945	8.92423	-4.55476	5.77e-05	0.00624039	1.46821	LOC101465092	ppp3ca	protein phosphatase 3 catalytic subunit alpha%2C transcript variant X1	NC_036782.1	27355630	27422652	67023	PPP3CA	protein phosphatase 3, catalytic subunit, alpha isozyme [Source:HGNC Symbol;Acc:9314]	protein phosphatase 3, catalytic subunit, alpha isozyme [Source:ZFIN;Acc:ZDB-GENE-091113-24]
gene5512	-3.08101	5.29271	-4.43317	8.32e-05	0.00762442	1.46517	LOC101484027	LOC101484027	60S ribosomal protein L22	NC_036784.1	26387674	26390990	3317	RPL22	ribosomal protein L22 [Source:HGNC Symbol;Acc:10315]	ribosomal protein L22 [Source:ZFIN;Acc:ZDB-GENE-051113-276]
gene17881	-2.84756	2.67663	-4.43208	8.34e-05	0.00762442	1.45975	LOC101481956	LOC101481956	protocadherin-8	NC_036795.1	16284567	16288437	3871	PCDH8	protocadherin 8 [Source:HGNC Symbol;Acc:8660]	protocadherin 8 [Source:HGNC Symbol;Acc:8660]
gene8450	-1.52584	7.37796	-4.48432	7.13e-05	0.00689004	1.4439	LOC101464432	rnf208	ring finger protein 208	NC_036786.1	41591283	41599503	8221	RNF208	ring finger protein 208 [Source:HGNC Symbol;Acc:25420]	ring finger protein 208 [Source:HGNC Symbol;Acc:25420]
gene19618	-3.09182	4.71233	-4.42059	8.63e-05	0.00780065	1.41833	LOC101483210	napg	NSF attachment protein gamma	NC_036797.1	7506979	7513514	6536	NAPG	N-ethylmaleimide-sensitive factor attachment protein, gamma [Source:HGNC Symbol;Acc:7642]	N-ethylmaleimide-sensitive factor attachment protein, gamma [Source:ZFIN;Acc:ZDB-GENE-040718-171]
gene7773	-3.07323	4.28539	-4.41238	8.85e-05	0.0079157	1.39523	LOC101480454	LOC101480454	uncharacterized LOC101480454%2C transcript variant X1	NC_036786.1	16467921	16499634	31714	FAM208A	family with sequence similarity 208, member A [Source:HGNC Symbol;Acc:30314]	family with sequence similarity 208, member Ab [Source:ZFIN;Acc:ZDB-GENE-090311-29]
gene23011	-2.85329	2.69114	-4.40682	9e-05	0.00800904	1.39249	LOC101487537	LOC101487537	CUGBP Elav-like family member 3%2C transcript variant X1	NC_036800.1	11987707	12022078	34372	CELF3	CUGBP, Elav-like family member 3 [Source:HGNC Symbol;Acc:11967]	cugbp, Elav-like family member 3a [Source:ZFIN;Acc:ZDB-GENE-000501-2]
gene8919	-2.96104	3.37745	-4.39884	9.22e-05	0.00810554	1.37523	LOC101467140	LOC101467140	serine/threonine-protein kinase SRK2H	NC_036786.1	55842431	55861091	18661	SNRK	SNF related kinase [Source:HGNC Symbol;Acc:30598]	SNF related kinase b [Source:ZFIN;Acc:ZDB-GENE-040426-1724]
gene8681	-2.90032	4.45823	-4.39792	9.24e-05	0.00810554	1.35539	LOC101475642	LOC101475642	BCL2/adenovirus E1B 19 kDa protein-interacting protein 3	NC_036786.1	48172562	48178896	6335	BNIP3L	BCL2/adenovirus E1B 19kDa interacting protein 3-like [Source:HGNC Symbol;Acc:1085]	zgc:73226 [Source:ZFIN;Acc:ZDB-GENE-050703-8]
gene4237	-2.93344	3.27431	-4.39051	9.45e-05	0.00819428	1.3516	LOC101483875	nkiras2	NFKB inhibitor interacting Ras like 2%2C transcript variant X2	NC_036783.1	22460481	22464196	3716	NKIRAS2	NFKB inhibitor interacting Ras-like 2 [Source:HGNC Symbol;Acc:17898]	NFKB inhibitor interacting Ras-like 2 [Source:ZFIN;Acc:ZDB-GENE-040801-166]
gene19949	-2.71083	2.57679	-4.38945	9.48e-05	0.00819428	1.34318	LOC101486463	LOC101486463	fizzy-related protein homolog%2C transcript variant X1	NC_036797.1	16374961	16382041	7081	FZR1	fizzy/cell division cycle 20 related 1 (Drosophila) [Source:HGNC Symbol;Acc:24824]	fizzy/cell division cycle 20 related 1 (Drosophila) [Source:ZFIN;Acc:ZDB-GENE-040426-712]
gene11589	-2.43044	6.17532	-4.38642	9.57e-05	0.00822964	1.323	LOC101468387	LOC101468387	14-3-3 protein epsilon%2C transcript variant X2	NC_036789.1	25736164	25752514	16351	YWHAE	tyrosine 3-monooxygenase/tryptophan 5-monooxygenase activation protein, epsilon polypeptide [Source:HGNC Symbol;Acc:12851]	tyrosine 3-monooxygenase/tryptophan 5-monooxygenase activation protein, epsilon polypeptide 2 [Source:ZFIN;Acc:ZDB-GENE-050306-44]
gene8605	-3.11814	4.43649	-4.38331	9.65e-05	0.00825894	1.31779	LOC101465740	edf1	endothelial differentiation related factor 1	NC_036786.1	45909489	45913856	4368	EDF1	endothelial differentiation-related factor 1 [Source:HGNC Symbol;Acc:3164]	endothelial differentiation-related factor 1 [Source:ZFIN;Acc:ZDB-GENE-040426-1710]
gene19668	-2.63141	2.55631	-4.38005	9.75e-05	0.00826993	1.31755	LOC101475954	LOC101475954	Krueppel-like factor 2	NC_036797.1	9195493	9197918	2426	KLF2	Kruppel-like factor 2 (lung) [Source:HGNC Symbol;Acc:6347]	Kruppel-like factor 2a [Source:ZFIN;Acc:ZDB-GENE-011109-1]
gene12256	-3.18134	4.37493	-4.38207	9.69e-05	0.00825894	1.31572	LOC101468916	LOC101468916	ataxin-1	NC_036790.1	16417317	16429582	12266	ATXN1	ataxin 1 [Source:HGNC Symbol;Acc:10548]	ataxin 1b [Source:ZFIN;Acc:ZDB-GENE-061218-2]
gene16973	-3.08734	5.23997	-4.37123	0.000100098	0.00842239	1.29882	LOC101481513	hivep2	human immunodeficiency virus type I enhancer binding protein 2%2C transcript variant X2	NC_036794.1	20426932	20548008	121077	HIVEP2	human immunodeficiency virus type I enhancer binding protein 2 [Source:HGNC Symbol;Acc:4921]	human immunodeficiency virus type I enhancer binding protein 2 [Source:ZFIN;Acc:ZDB-GENE-041014-354]
gene16559	-3.09062	3.84137	-4.3696	0.000100588	0.00842239	1.29424	LOC101477698	mtmr9	myotubularin related protein 9	NC_036794.1	8281025	8293820	12796	MTMR9	myotubularin related protein 9 [Source:HGNC Symbol;Acc:14596]	myotubularin related protein 9 [Source:ZFIN;Acc:ZDB-GENE-040724-223]
gene1135	-2.81445	3.6243	-4.36926	0.000100688	0.00842239	1.28935	LOC101465090	LOC101465090	teneurin-3%2C transcript variant X1	NC_036781.1	5257850	5391306	133457	TENM3	teneurin transmembrane protein 3 [Source:HGNC Symbol;Acc:29944]	si:dkey-237h12.3 [Source:ZFIN;Acc:ZDB-GENE-081027-3]
gene2352	-2.62316	5.9582	-4.3659	0.000101707	0.00846841	1.2805	LOC101466147	LOC101466147	uncharacterized LOC101466147%2C transcript variant X1	NC_036782.1	11028433	11077677	49245	ZNF638	zinc finger protein 638 [Source:HGNC Symbol;Acc:17894]	matrin 3-like 1.1 [Source:ZFIN;Acc:ZDB-GENE-030616-40]
gene24299	-2.7115	3.16405	-4.36402	0.000102278	0.00847686	1.27907	LOC101484413	hdlbp	high density lipoprotein binding protein	NC_036801.1	13416538	13433926	17389	HDLBP	high density lipoprotein binding protein [Source:HGNC Symbol;Acc:4857]	high density lipoprotein-binding protein (vigilin) [Source:ZFIN;Acc:ZDB-GENE-030131-2032]
gene1712	-3.10745	4.18259	-4.3555	0.000104917	0.00865587	1.24682	LOC101467159	ran	RAN%2C member RAS oncogene family	NC_036781.1	25973599	25975271	1673	RAN	RAN, member RAS oncogene family [Source:HGNC Symbol;Acc:9846]	ras-related nuclear protein [Source:ZFIN;Acc:ZDB-GENE-990415-88]
gene13736	-2.89709	3.86195	-4.34769	0.000107394	0.00881997	1.22908	LOC101471166	LOC101471166	clathrin heavy chain 1%2C transcript variant X1	NC_036791.1	24482866	24512205	29340	CLTCL1	clathrin, heavy chain-like 1 [Source:HGNC Symbol;Acc:2093]	clathrin, heavy chain-like 1 [Source:HGNC Symbol;Acc:2093]
gene20494	-2.75525	3.04343	-4.34301	0.000108904	0.00886339	1.22433	LOC101464079	snx6	sorting nexin 6	NC_036798.1	1230432	1237581	7150	SNX6	sorting nexin 6 [Source:HGNC Symbol;Acc:14970]	sorting nexin 6 [Source:ZFIN;Acc:ZDB-GENE-050913-152]
gene24663	-1.71906	7.68906	-4.41261	8.84e-05	0.0079157	1.21381	LOC101476311	LOC101476311	sodium/potassium-transporting ATPase subunit alpha-1	NC_036801.1	26383471	26409472	26002	ATP1A1	ATPase, Na+/K+ transporting, alpha 1 polypeptide [Source:HGNC Symbol;Acc:799]	ATPase, Na+/K+ transporting, alpha 1b polypeptide [Source:ZFIN;Acc:ZDB-GENE-001212-5]
gene20215	-2.85692	3.74457	-4.33828	0.000110453	0.00894914	1.20469	LOC101476578	mier1	MIER1 transcriptional regulator%2C transcript variant X4	NC_036797.1	21344461	21356258	11798	MIER1	mesoderm induction early response 1 homolog (Xenopus laevis) [Source:HGNC Symbol;Acc:29657]	mesoderm induction early response 1b [Source:ZFIN;Acc:ZDB-GENE-070705-170]
gene26562	-2.72756	3.01029	-4.33505	0.000111522	0.00895529	1.20261	LOC101470515	clcn7	chloride voltage-gated channel 7%2C transcript variant X1	NW_020192397.1	126880	144414	17535	CLCN7	chloride channel, voltage-sensitive 7 [Source:HGNC Symbol;Acc:2025]	chloride channel 7 [Source:ZFIN;Acc:ZDB-GENE-061103-196]
gene17344	-3.07359	5.20346	-4.33375	0.000111958	0.00895529	1.19814	LOC101486506	LOC101486506	CD59 glycoprotein	NC_036794.1	33983263	33993455	10193	CD59	CD59 molecule, complement regulatory protein [Source:HGNC Symbol;Acc:1689]	Uncharacterized protein [Source:UniProtKB/TrEMBL;Acc:E7F2M5]
gene21390	1.27811	7.41938	4.43156	8.36e-05	0.00762442	1.19623	LOC101467612	lrtm1	leucine rich repeats and transmembrane domains 1	NC_036799.1	680255	686302	6048	LRTM1	leucine-rich repeats and transmembrane domains 1 [Source:HGNC Symbol;Acc:25023]	leucine-rich repeats and transmembrane domains 1 [Source:HGNC Symbol;Acc:25023]
gene11074	-3.1095	3.99383	-4.33357	0.000112015	0.00895529	1.19314	LOC101470653	LOC101470653	pyruvate dehydrogenase E1 component subunit alpha%2C mitochondrial	NC_036789.1	12949791	12955936	6146	PDHA1	pyruvate dehydrogenase (lipoamide) alpha 1 [Source:HGNC Symbol;Acc:8806]	pyruvate dehydrogenase (lipoamide) alpha 1a [Source:ZFIN;Acc:ZDB-GENE-040426-2719]
gene7513	-2.82988	3.83875	-4.32811	0.000113855	0.00903259	1.17692	LOC101481835	LOC101481835	CD9 antigen%2C transcript variant X1	NC_036786.1	10777687	10784176	6490	CD9	CD9 molecule [Source:HGNC Symbol;Acc:1709]	CD9 antigen (p24) a [Source:ZFIN;Acc:ZDB-GENE-030131-1175]
gene4249	-2.83772	2.66782	-4.31342	0.000118955	0.00928104	1.14286	LOC101487936	fbxl20	F-box and leucine rich repeat protein 20%2C transcript variant X1	NC_036783.1	22618217	22635040	16824	FBXL20	F-box and leucine-rich repeat protein 20 [Source:HGNC Symbol;Acc:24679]	F-box and leucine-rich repeat protein 20 [Source:ZFIN;Acc:ZDB-GENE-081031-27]
gene16550	-2.85826	3.68103	-4.31281	0.000119172	0.00928104	1.13998	LOC101475494	LOC101475494	low density lipoprotein receptor adapter protein 1%2C transcript variant X2	NC_036794.1	8094461	8142167	47707	LDLRAP1	low density lipoprotein receptor adaptor protein 1 [Source:HGNC Symbol;Acc:18640]	si:dkey-71h2.2 [Source:ZFIN;Acc:ZDB-GENE-041014-145]
gene671	-1.72246	6.82189	-4.34504	0.000108248	0.00884987	1.11824	LOC101468925	baz2b	bromodomain adjacent to zinc finger domain 2B%2C transcript variant X1	NC_036780.1	25632885	25700950	68066	BAZ2B	bromodomain adjacent to zinc finger domain, 2B [Source:HGNC Symbol;Acc:963]	bromodomain adjacent to zinc finger domain, 2B [Source:HGNC Symbol;Acc:963]
gene1735	-2.93817	3.72871	-4.30377	0.000122424	0.00947247	1.11649	LOC101473971	LOC101473971	probable E3 ubiquitin-protein ligase MID2%2C transcript variant X1	NC_036781.1	26955681	27128767	173087	MID2	midline 2 [Source:HGNC Symbol;Acc:7096]	midline 2 [Source:ZFIN;Acc:ZDB-GENE-090220-1]
gene18440	-3.13776	4.48651	-4.30308	0.000122679	0.00947247	1.10651	LOC101483193	LOC101483193	rab GDP dissociation inhibitor beta	NC_036796.1	1246551	1258298	11748	GDI2	GDP dissociation inhibitor 2 [Source:HGNC Symbol;Acc:4227]	GDP dissociation inhibitor 2 [Source:ZFIN;Acc:ZDB-GENE-030131-2485]
gene8380	-2.69334	3.17648	-4.29575	0.000125388	0.00959958	1.09715	LOC101465877	LOC101465877	SH2 domain-containing protein 3C%2C transcript variant X1	NC_036786.1	39220349	39276202	55854	SH2D3C	SH2 domain containing 3C [Source:HGNC Symbol;Acc:16884]	SH2 domain containing 3Ca [Source:ZFIN;Acc:ZDB-GENE-080102-1]
gene3198	-2.593	2.53567	-4.29696	0.000124935	0.00959958	1.0964	LOC101484512	rwdd4	RWD domain containing 4	NC_036782.1	34260551	34271297	10747	RWDD4	RWD domain containing 4 [Source:HGNC Symbol;Acc:23750]	RWD domain containing 4 [Source:ZFIN;Acc:ZDB-GENE-041010-61]
gene23023	-2.64574	3.15312	-4.29195	0.000126815	0.00962725	1.08675	LOC101467181	LOC101467181	neuronal acetylcholine receptor subunit alpha-7%2C transcript variant X1	NC_036800.1	12172592	12192962	20371	CHRNA7	cholinergic receptor, nicotinic, alpha 7 (neuronal) [Source:HGNC Symbol;Acc:1960]	si:ch211-39a7.1 [Source:ZFIN;Acc:ZDB-GENE-060503-606]
gene13898	-2.75123	2.62535	-4.29221	0.000126713	0.00962725	1.08572	LOC101474701	LOC101474701	histone H2A.V	NC_036791.1	28581087	28583919	2833	H2AFV	H2A histone family, member V [Source:HGNC Symbol;Acc:20664]	H2A histone family, member Va [Source:ZFIN;Acc:ZDB-GENE-020717-1]
gene24612	-1.10269	9.167	-4.43316	8.32e-05	0.00762442	1.08141	LOC101479001	s100b	S100 calcium binding protein B	NC_036801.1	23914454	23919952	5499	S100B	S100 calcium binding protein B [Source:HGNC Symbol;Acc:10500]	S100 calcium binding protein, beta (neural) [Source:ZFIN;Acc:ZDB-GENE-040718-290]
gene115	-2.91053	4.46108	-4.28595	0.0001291	0.00975973	1.06018	LOC101481877	dnaja2	DnaJ heat shock protein family (Hsp40) member A2	NC_036780.1	5646575	5656871	10297	DNAJB11	DnaJ (Hsp40) homolog, subfamily B, member 11 [Source:HGNC Symbol;Acc:14889]	DnaJ (Hsp40) homolog, subfamily B, member 11 [Source:ZFIN;Acc:ZDB-GENE-031113-9]
gene19854	-1.82831	6.97919	-4.32774	0.000113982	0.00903259	1.05647	LOC101463785	LOC101463785	glutamine synthetase	NC_036797.1	14150610	14154235	3626	GLUL	glutamate-ammonia ligase [Source:HGNC Symbol;Acc:4341]	glutamate-ammonia ligase (glutamine synthase) a [Source:ZFIN;Acc:ZDB-GENE-030131-688]
gene14719	-2.83499	3.27127	-4.27485	0.000133433	0.0100432	1.04248	LOC101486425	LOC101486425	erlin-1%2C transcript variant X2	NC_036792.1	17995520	18004716	9197	ERLIN1	ER lipid raft associated 1 [Source:HGNC Symbol;Acc:16947]	ER lipid raft associated 1 [Source:ZFIN;Acc:ZDB-GENE-050327-13]
gene11158	-2.74302	3.17386	-4.27013	0.000135319	0.0100615	1.029	LOC101468784	LOC101468784	tricarboxylate transport protein%2C mitochondrial%2C transcript variant X1	NC_036789.1	14269886	14274565	4680	SLC25A1	solute carrier family 25 (mitochondrial carrier; citrate transporter), member 1 [Source:HGNC Symbol;Acc:10979]	solute carrier family 25 (mitochondrial carrier; citrate transporter), member 1a [Source:ZFIN;Acc:ZDB-GENE-040426-1172]
gene13643	-2.83362	2.63735	-4.27024	0.000135277	0.0100615	1.02765	LOC101463711	znf131	zinc finger protein 131%2C transcript variant X1	NC_036791.1	21916698	21923202	6505	ZNF131	zinc finger protein 131 [Source:HGNC Symbol;Acc:12915]	zinc finger protein 131 [Source:ZFIN;Acc:ZDB-GENE-040426-1563]
gene15022	-2.77015	3.21413	-4.26864	0.00013592	0.0100647	1.02545	LOC101484800	ogfrl1	opioid growth factor receptor like 1	NC_036792.1	28040560	28050489	9930	OGFRL1	opioid growth factor receptor-like 1 [Source:HGNC Symbol;Acc:21378]	opioid growth factor receptor-like 1 [Source:ZFIN;Acc:ZDB-GENE-061207-32]
gene4920	-2.67569	2.56739	-4.26212	0.000138582	0.01022	1.00487	LOC101477813	LOC101477813	MICOS complex subunit mic25a%2C transcript variant X2	NC_036784.1	12401520	12453743	52224	NA	NA	coiled-coil-helix-coiled-coil-helix domain containing 6a [Source:ZFIN;Acc:ZDB-GENE-040930-2]
gene3711	-2.61492	2.93799	-4.25347	0.00014219	0.0104398	0.984466	LOC101484717	LOC101484717	platelet endothelial cell adhesion molecule	NC_036783.1	11164735	11174422	9688	NA	NA	platelet endothelial cell adhesion molecule precursor [Source:RefSeq peptide;Acc:NP_001107271]
gene15202	-1.78045	7.33524	-4.31615	0.000117991	0.00926899	0.980827	LOC101472774	scg2	secretogranin II	NC_036793.1	4243949	4247785	3837	SCG2	secretogranin II [Source:HGNC Symbol;Acc:10575]	secretogranin II (chromogranin C) a [Source:ZFIN;Acc:ZDB-GENE-030131-8214]
gene8595	-2.67162	2.57962	-4.25222	0.000142718	0.0104398	0.978935	LOC101484493	LOC101484493	uncharacterized LOC101484493%2C transcript variant X1	NC_036786.1	45608993	45652299	43307	TGFBR3	transforming growth factor, beta receptor III [Source:HGNC Symbol;Acc:11774]	transforming growth factor, beta receptor III [Source:ZFIN;Acc:ZDB-GENE-120215-125]
gene7348	-2.67504	2.58041	-4.24273	0.0001468	0.0106521	0.953853	LOC101479848	pdhx	pyruvate dehydrogenase complex component X	NC_036786.1	6355553	6388716	33164	PDHX	pyruvate dehydrogenase complex, component X [Source:HGNC Symbol;Acc:21350]	pyruvate dehydrogenase complex, component X [Source:ZFIN;Acc:ZDB-GENE-040426-1539]
gene3873	-2.70814	3.31872	-4.23035	0.000152291	0.0109625	0.923153	LOC101481380	aimp2	aminoacyl tRNA synthetase complex interacting multifunctional protein 2%2C transcript variant X1	NC_036783.1	14533041	14537140	4100	AIMP2	aminoacyl tRNA synthetase complex-interacting multifunctional protein 2 [Source:HGNC Symbol;Acc:20609]	aminoacyl tRNA synthetase complex-interacting multifunctional protein 2 [Source:ZFIN;Acc:ZDB-GENE-040426-2652]
gene15809	-2.83442	3.08935	-4.22439	0.00015501	0.010967	0.908585	LOC101481672	LOC101481672	roundabout homolog 2%2C transcript variant X1	NC_036793.1	24062272	24131231	68960	ROBO3	roundabout, axon guidance receptor, homolog 3 (Drosophila) [Source:HGNC Symbol;Acc:13433]	roundabout, axon guidance receptor, homolog 3 (Drosophila) [Source:HGNC Symbol;Acc:13433]
gene15300	-2.62723	3.12956	-4.22234	0.000155952	0.010967	0.901801	LOC101474913	tmem25	transmembrane protein 25	NC_036793.1	7610120	7617391	7272	TMEM25	transmembrane protein 25 [Source:HGNC Symbol;Acc:25890]	transmembrane protein 25 [Source:HGNC Symbol;Acc:25890]
gene3165	-2.84643	3.64906	-4.22288	0.000155703	0.010967	0.900611	LOC101487035	drap1	DR1 associated protein 1	NC_036782.1	33317577	33325304	7728	DRAP1	DR1-associated protein 1 (negative cofactor 2 alpha) [Source:HGNC Symbol;Acc:3019]	DR1-associated protein 1 (negative cofactor 2 alpha) [Source:ZFIN;Acc:ZDB-GENE-030131-400]
gene2199	2.74304	4.33485	4.22316	0.000155573	0.010967	0.892608	LOC112431451	LOC112431451		NC_036782.1	7000131	7001192	1062	NA	NA	NA
gene9383	-2.8107	3.8816	-4.21603	0.000158896	0.0111277	0.880907	LOC101464159	shisa9	shisa family member 9	NC_036787.1	6152949	6228327	75379	SHISA9	shisa homolog 9 (Xenopus laevis) [Source:HGNC Symbol;Acc:37231]	shisa homolog 9 (Xenopus laevis) [Source:ZFIN;Acc:ZDB-GENE-050320-78]
gene24853	-1.83352	6.34649	-4.24	0.00014799	0.0106956	0.87626	LOC101469939	LOC101469939	peripheral plasma membrane protein CASK%2C transcript variant X1	NC_036801.1	35601753	35651601	49849	CASK	calcium/calmodulin-dependent serine protein kinase (MAGUK family) [Source:HGNC Symbol;Acc:1497]	calcium/calmodulin-dependent serine protein kinase (MAGUK family) [Source:HGNC Symbol;Acc:1497]
gene22212	-2.72579	3.20076	-4.2123	0.000160664	0.011208	0.87581	LOC112429721	LOC112429721	proteolipid protein 2-like	NC_036799.1	21504383	21511597	7215	PLP2	proteolipid protein 2 (colonic epithelium-enriched) [Source:HGNC Symbol;Acc:9087]	proteolipid protein 2 [Source:ZFIN;Acc:ZDB-GENE-030710-11]
gene1331	-2.62468	2.55125	-4.20948	0.000162011	0.0112585	0.865652	LOC101475005	hprt1	hypoxanthine phosphoribosyltransferase 1	NC_036781.1	16436978	16445971	8994	HPRT1	hypoxanthine phosphoribosyltransferase 1 [Source:HGNC Symbol;Acc:5157]	hypoxanthine phosphoribosyltransferase 1 [Source:ZFIN;Acc:ZDB-GENE-040426-1918]
gene15293	-3.18978	4.73421	-4.201	0.000166133	0.0114693	0.839335	LOC101476002	bace1	beta-secretase 1	NC_036793.1	7495181	7510763	15583	BACE1	beta-site APP-cleaving enzyme 1 [Source:HGNC Symbol;Acc:933]	Uncharacterized protein [Source:UniProtKB/TrEMBL;Acc:E7F3Q0]
gene13389	-2.66754	3.15064	-4.19469	0.000169269	0.0115521	0.828836	LOC101475311	LOC101475311	hyaluronan and proteoglycan link protein 1	NC_036791.1	15876403	15883668	7266	HAPLN1	hyaluronan and proteoglycan link protein 1 [Source:HGNC Symbol;Acc:2380]	hyaluronan and proteoglycan link protein 1a [Source:ZFIN;Acc:ZDB-GENE-050302-175]
gene21477	-2.65421	2.96069	-4.19297	0.000170134	0.0115521	0.824447	LOC101465390	LOC101465390	proliferation-associated protein 2G4	NC_036799.1	2399705	2405068	5364	PA2G4	proliferation-associated 2G4, 38kDa [Source:HGNC Symbol;Acc:8550]	proliferation-associated 2G4, b [Source:ZFIN;Acc:ZDB-GENE-030131-2182]
gene11314	-2.58774	5.82728	-4.19674	0.000168244	0.0115521	0.824007	LOC101473999	LOC101473999	lissencephaly-1 homolog B%2C transcript variant X1	NC_036789.1	17904254	17921217	16964	PAFAH1B1	platelet-activating factor acetylhydrolase 1b, regulatory subunit 1 (45kDa) [Source:HGNC Symbol;Acc:8574]	platelet-activating factor acetylhydrolase, isoform Ib, alpha subunit b [Source:ZFIN;Acc:ZDB-GENE-040116-3]
gene7284	-2.80475	3.80643	-4.19327	0.000169981	0.0115521	0.820444	LOC101466601	LOC101466601	cryptochrome-1%2C transcript variant X1	NC_036786.1	4405112	4420853	15742	CRY1	cryptochrome 1 (photolyase-like) [Source:HGNC Symbol;Acc:2384]	cryptochrome 1a [Source:ZFIN;Acc:ZDB-GENE-010426-2]
gene13254	-2.5157	5.68081	-4.19182	0.000170711	0.0115521	0.815139	LOC101472791	LOC101472791	AN1-type zinc finger protein 5%2C transcript variant X2	NC_036791.1	11606450	11613504	7055	ZFAND5	zinc finger, AN1-type domain 5 [Source:HGNC Symbol;Acc:13008]	zinc finger, AN1-type domain 5a [Source:ZFIN;Acc:ZDB-GENE-040426-1979]
gene11240	-1.16054	8.63989	-4.31849	0.000117169	0.00924462	0.811459	LOC101478854	LOC101478854	high mobility group protein B1	NC_036789.1	16665076	16669099	4024	HMGB1	high mobility group box 1 [Source:HGNC Symbol;Acc:4983]	high-mobility group box 1a [Source:ZFIN;Acc:ZDB-GENE-030131-341]
gene25764	-2.72813	3.54143	-4.18771	0.000172802	0.01165	0.807957	LOC101484627	LOC101484627	E3 ubiquitin/ISG15 ligase TRIM25%2C transcript variant X1	NW_020192350.1	193004	201980	8977	TRIM25	tripartite motif containing 25 [Source:HGNC Symbol;Acc:12932]	tripartite motif containing 14 [Source:HGNC Symbol;Acc:16283]
gene25548	-2.66268	5.02719	-4.1817	0.000175901	0.0117711	0.794387	LOC101477886	ktn1	kinectin 1%2C transcript variant X1	NW_020192340.1	86976	105776	18801	KTN1	kinectin 1 (kinesin receptor) [Source:HGNC Symbol;Acc:6467]	kinectin 1 [Source:ZFIN;Acc:ZDB-GENE-030408-4]
gene19075	-2.69062	3.72122	-4.18307	0.000175192	0.0117672	0.793514	LOC101486866	LOC101486866	F-box/LRR-repeat protein 14	NC_036796.1	25782762	25786558	3797	FBXL14	F-box and leucine-rich repeat protein 14 [Source:HGNC Symbol;Acc:28624]	F-box and leucine-rich repeat protein 14b [Source:ZFIN;Acc:ZDB-GENE-030131-3556]
gene6258	-2.62919	3.22063	-4.16791	0.000183224	0.0121348	0.757409	LOC101479323	g3bp2	G3BP stress granule assembly factor 2%2C transcript variant X1	NC_036785.1	15540158	15550022	9865	G3BP2	GTPase activating protein (SH3 domain) binding protein 2 [Source:HGNC Symbol;Acc:30291]	GTPase activating protein (SH3 domain) binding protein 2 [Source:HGNC Symbol;Acc:30291]
gene3959	-2.57426	5.55096	-4.16767	0.000183352	0.0121348	0.754443	LOC101475464	prkar1b	protein kinase cAMP-dependent type I regulatory subunit beta%2C transcript variant X1	NC_036783.1	16528143	16594521	66379	PRKAR1B	protein kinase, cAMP-dependent, regulatory, type I, beta [Source:HGNC Symbol;Acc:9390]	protein kinase, cAMP-dependent, regulatory, type I, beta [Source:ZFIN;Acc:ZDB-GENE-060929-580]
gene11118	-2.96513	4.08286	-4.16199	0.000186457	0.0122953	0.738762	LOC101487592	LOC101487592	thy-1 membrane glycoprotein%2C transcript variant X1	NC_036789.1	13877605	13879378	1774	NA	NA	si:dkeyp-69c1.7 [Source:ZFIN;Acc:ZDB-GENE-091204-69]
gene14532	-2.73274	5.06813	-4.16054	0.000187254	0.0123029	0.738749	LOC101483474	smndc1	survival motor neuron domain containing 1	NC_036792.1	13239873	13245703	5831	SMNDC1	survival motor neuron domain containing 1 [Source:HGNC Symbol;Acc:16900]	survival motor neuron domain containing 1 [Source:ZFIN;Acc:ZDB-GENE-030131-614]
gene10216	-2.5911	3.08495	-4.15879	0.000188227	0.012322	0.733635	LOC101477525	LOC101477525	ras-related protein Rab-18	NC_036788.1	5266580	5278122	11543	RAB18	RAB18, member RAS oncogene family [Source:HGNC Symbol;Acc:14244]	RAB18B, member RAS oncogene family [Source:ZFIN;Acc:ZDB-GENE-040801-185]
gene6393	-2.81814	3.07094	-4.1534	0.000191249	0.0124298	0.720415	LOC101473219	ugt8	UDP glycosyltransferase 8%2C transcript variant X2	NC_036785.1	19308039	19334844	26806	UGT8	UDP glycosyltransferase 8 [Source:HGNC Symbol;Acc:12555]	UDP glycosyltransferase 8 [Source:HGNC Symbol;Acc:12555]
gene26972	-1.28786	7.63595	-4.24491	0.00014585	0.0106259	0.720057	LOC101478908	stmn4	stathmin 4	NW_020192427.1	61999	74247	12249	STMN4	stathmin-like 4 [Source:HGNC Symbol;Acc:16078]	stathmin-like 4 [Source:ZFIN;Acc:ZDB-GENE-040426-2732]
gene19940	-2.7333	3.72138	-4.14019	0.000198851	0.0128316	0.682541	LOC101466851	ndufa13	NADH:ubiquinone oxidoreductase subunit A13	NC_036797.1	16209407	16213675	4269	NDUFA13	NADH dehydrogenase (ubiquinone) 1 alpha subcomplex, 13 [Source:HGNC Symbol;Acc:17194]	NA
gene17693	-2.11581	5.84771	-4.14764	0.000194525	0.0125974	0.677322	LOC101468080	tspan7	tetraspanin 7	NC_036795.1	11805890	11819647	13758	TSPAN7	tetraspanin 7 [Source:HGNC Symbol;Acc:11854]	tetraspanin 7b [Source:ZFIN;Acc:ZDB-GENE-040927-5]
gene19744	-2.96131	4.1067	-4.13839	0.000199912	0.0128541	0.675673	LOC101478273	rock1	Rho associated coiled-coil containing protein kinase 1%2C transcript variant X2	NC_036797.1	10854719	10886059	31341	ROCK1	Rho-associated, coiled-coil containing protein kinase 1 [Source:HGNC Symbol;Acc:10251]	Rho-associated, coiled-coil containing protein kinase 1 [Source:ZFIN;Acc:ZDB-GENE-100712-2]
gene9449	1.22577	8.1478	4.27352	0.000133961	0.0100432	0.66607	LOC101486055	faap100	Fanconi anemia core complex associated protein 100%2C transcript variant X1	NC_036787.1	7374043	7378980	4938	C17orf70	chromosome 17 open reading frame 70 [Source:HGNC Symbol;Acc:26171]	chromosome 17 open reading frame 70 [Source:HGNC Symbol;Acc:26171]
gene7655	-2.62782	5.04247	-4.12951	0.000205216	0.0129945	0.657138	LOC101475559	myrf	myelin regulatory factor%2C transcript variant X1	NC_036786.1	14007787	14028748	20962	MYRF	myelin regulatory factor [Source:HGNC Symbol;Acc:1181]	myelin regulatory factor [Source:ZFIN;Acc:ZDB-GENE-080204-57]
gene17587	-2.8849	3.65851	-4.12974	0.000205075	0.0129945	0.656585	LOC101487236	rif1	replication timing regulatory factor 1%2C transcript variant X1	NC_036795.1	8518991	8540713	21723	RIF1	RAP1 interacting factor homolog (yeast) [Source:HGNC Symbol;Acc:23207]	RAP1 interacting factor homolog (yeast) [Source:ZFIN;Acc:ZDB-GENE-030131-3406]
gene21588	-3.04777	4.13808	-4.12923	0.000205385	0.0129945	0.651996	LOC101478780	atp5pb	ATP synthase peripheral stalk-membrane subunit b	NC_036799.1	4294811	4299932	5122	ATP5F1	ATP synthase, H+ transporting, mitochondrial Fo complex, subunit B1 [Source:HGNC Symbol;Acc:840]	ATP synthase, H+ transporting, mitochondrial F0 complex, subunit b, isoform 1 [Source:ZFIN;Acc:ZDB-GENE-041010-33]
gene4252	-2.20048	5.75701	-4.12872	0.000205691	0.0129945	0.632956	LOC101463831	LOC101463831	protein phosphatase 1 regulatory subunit 1B%2C transcript variant X1	NC_036783.1	22697419	22720276	22858	PPP1R1B	protein phosphatase 1, regulatory (inhibitor) subunit 1B [Source:HGNC Symbol;Acc:9287]	protein phosphatase 1, regulatory (inhibitor) subunit 1B [Source:HGNC Symbol;Acc:9287]
gene2820	-1.57333	7.4801	-4.20064	0.000166314	0.0114693	0.626479	LOC101464922	LOC101464922	daf-12-interacting protein 1	NC_036782.1	22103051	22128669	25619	ZBTB4	zinc finger and BTB domain containing 4 [Source:HGNC Symbol;Acc:23847]	zinc finger and BTB domain containing 4 [Source:ZFIN;Acc:ZDB-GENE-100318-5]
gene7214	-2.809	3.22653	-4.11467	0.000214387	0.0133047	0.61814	LOC101484474	lg7h16orf70	linkage group 7 C16orf70 homolog%2C transcript variant X1	NC_036786.1	1478280	1491186	12907	C16orf70	chromosome 16 open reading frame 70 [Source:HGNC Symbol;Acc:29564]	chromosome 16 open reading frame 70 [Source:HGNC Symbol;Acc:29564]
gene13744	-2.60559	2.54293	-4.11486	0.00021427	0.0133047	0.61708	LOC101468461	pradc1	protease associated domain containing 1	NC_036791.1	24663395	24670411	7017	PRADC1	protease-associated domain containing 1 [Source:HGNC Symbol;Acc:16047]	NA
gene3692	-2.36045	5.50985	-4.11509	0.000214124	0.0133047	0.610697	LOC101485565	LOC101485565	voltage-dependent T-type calcium channel subunit alpha-1I%2C transcript variant X1	NC_036783.1	10365644	10425950	60307	CACNA1H	calcium channel, voltage-dependent, T type, alpha 1H subunit [Source:HGNC Symbol;Acc:1395]	Uncharacterized protein [Source:UniProtKB/TrEMBL;Acc:F1RAM5]
gene4995	-2.70202	3.2578	-4.11146	0.000216423	0.0133047	0.609258	LOC101475024	LOC101475024	arf-GAP with GTPase%2C ANK repeat and PH domain-containing protein 1%2C transcript variant X1	NC_036784.1	14315005	14335776	20772	AGAP2	ArfGAP with GTPase domain, ankyrin repeat and PH domain 2 [Source:HGNC Symbol;Acc:16921]	ArfGAP with GTPase domain, ankyrin repeat and PH domain 2 [Source:HGNC Symbol;Acc:16921]
gene23511	-2.67589	3.31626	-4.11107	0.000216671	0.0133047	0.607891	LOC101482269	LOC101482269	GON-4-like protein	NC_036800.1	24743210	24756723	13514	GON4L	gon-4-like (C. elegans) [Source:HGNC Symbol;Acc:25973]	si:dkey-27c15.3 [Source:ZFIN;Acc:ZDB-GENE-060503-728]
gene12166	-1.30615	8.16397	-4.22535	0.000154567	0.010967	0.604081	LOC101480044	aplp1	amyloid beta precursor like protein 1%2C transcript variant X1	NC_036790.1	14937726	14972809	35084	APLP1	amyloid beta (A4) precursor-like protein 1 [Source:HGNC Symbol;Acc:597]	amyloid beta (A4) precursor-like protein 1 [Source:ZFIN;Acc:ZDB-GENE-040319-1]
gene3912	-2.57857	2.4946	-4.10929	0.000217808	0.0133047	0.601989	LOC101467917	LOC101467917	chromobox protein homolog 8	NC_036783.1	15387833	15390591	2759	CBX8	chromobox homolog 8 [Source:HGNC Symbol;Acc:15962]	chromobox homolog 8a (Pc class homolog, Drosophila) [Source:ZFIN;Acc:ZDB-GENE-040405-1]
gene22964	1.53082	7.34398	4.22225	0.000155996	0.010967	0.600443	LOC101470395	tmem268	transmembrane protein 268%2C transcript variant X3	NC_036800.1	10724728	10736316	11589	C9orf91	chromosome 9 open reading frame 91 [Source:HGNC Symbol;Acc:24513]	chromosome 9 open reading frame 91 [Source:HGNC Symbol;Acc:24513]
gene1393	-2.83223	3.61003	-4.10817	0.00021853	0.0133047	0.599829	LOC101467141	LOC101467141	glutamate receptor 1%2C transcript variant X1	NC_036781.1	18392769	18612384	219616	GRIA4	glutamate receptor, ionotropic, AMPA 4 [Source:HGNC Symbol;Acc:4574]	glutamate receptor, ionotropic, AMPA 1a [Source:ZFIN;Acc:ZDB-GENE-020125-1]
gene7886	-2.73183	3.7411	-4.10822	0.000218498	0.0133047	0.598104	LOC101471034	ppib	peptidylprolyl isomerase B	NC_036786.1	20389870	20394603	4734	PPIB	peptidylprolyl isomerase B (cyclophilin B) [Source:HGNC Symbol;Acc:9255]	peptidylprolyl isomerase B (cyclophilin B) [Source:ZFIN;Acc:ZDB-GENE-040426-1955]
gene22694	-2.89346	4.35527	-4.09885	0.000224609	0.0135727	0.571297	LOC101468857	LOC101468857	uncharacterized LOC101468857%2C transcript variant X1	NC_036800.1	3339744	3411997	72254	FAM131B	family with sequence similarity 131, member B [Source:HGNC Symbol;Acc:22202]	family with sequence similarity 131, member Ba [Source:ZFIN;Acc:ZDB-GENE-060503-616]
gene3622	1.43867	6.43759	4.1731	0.000180431	0.0120296	0.560843	LOC101481474	LOC101481474	uncharacterized LOC101481474%2C transcript variant X2	NC_036783.1	8374226	8387851	13626	SP140	SP140 nuclear body protein [Source:HGNC Symbol;Acc:17133]	Uncharacterized protein [Source:UniProtKB/TrEMBL;Acc:E7F805]
gene24719	-2.2435	6.06904	-4.1079	0.000218701	0.0133047	0.558714	LOC101470583	LOC101470583	TSC22 domain family protein 1%2C transcript variant X1	NC_036801.1	28312855	28340933	28079	TSC22D1	TSC22 domain family, member 1 [Source:HGNC Symbol;Acc:16826]	TSC22 domain family 2 [Source:ZFIN;Acc:ZDB-GENE-031001-12]
gene26357	-2.72103	3.17288	-4.08985	0.000230636	0.0137334	0.552808	LOC101487289	lrfn5	leucine rich repeat and fibronectin type III domain containing 5%2C transcript variant X2	NW_020192383.1	146622	282416	135795	LRFN5	leucine rich repeat and fibronectin type III domain containing 5 [Source:HGNC Symbol;Acc:20360]	leucine rich repeat and fibronectin type III domain containing 5 [Source:HGNC Symbol;Acc:20360]
gene4941	-2.63014	2.54899	-4.08734	0.000232341	0.0137334	0.545218	LOC101465523	phf13	PHD finger protein 13	NC_036784.1	13030181	13037058	6878	PHF13	PHD finger protein 13 [Source:HGNC Symbol;Acc:22983]	PHD finger protein 13 [Source:HGNC Symbol;Acc:22983]
gene25638	-2.72644	3.88521	-4.08698	0.000232589	0.0137334	0.541849	LOC101466095	LOC101466095	cullin-3%2C transcript variant X1	NW_020192342.1	770629	783109	12481	CUL3	cullin 3 [Source:HGNC Symbol;Acc:2553]	Uncharacterized protein [Source:UniProtKB/TrEMBL;Acc:E7F6S3]
gene20482	-3.19903	3.65308	-4.08564	0.000233505	0.0137426	0.541822	LOC112436572	LOC112436572	cytochrome c oxidase subunit 8A%2C mitochondrial	NC_036798.1	970037	973535	3499	CantFind	CantFind	CantFind
gene25417	2.87493	2.49475	4.09137	0.000229603	0.0137334	0.537839	LOC112430645	LOC112430645	nuclear receptor ROR-gamma-like%2C transcript variant X1	NW_020192335.1	316135	322720	6586	RORC	RAR-related orphan receptor C [Source:HGNC Symbol;Acc:10260]	RAR-related orphan receptor C [Source:HGNC Symbol;Acc:10260]
gene1440	-2.60106	5.09378	-4.07928	0.000237915	0.0139566	0.525071	LOC101475783	dctn4	dynactin subunit 4%2C transcript variant X1	NC_036781.1	19957449	19967479	10031	DCTN4	dynactin 4 (p62) [Source:HGNC Symbol;Acc:15518]	dynactin 4 [Source:ZFIN;Acc:ZDB-GENE-050417-306]
gene9524	-2.52624	2.89337	-4.07769	0.000239029	0.0139756	0.520757	LOC101467219	rhbdl1	rhomboid like 1	NC_036787.1	8605953	8658707	52755	RHBDL1	rhomboid, veinlet-like 1 (Drosophila) [Source:HGNC Symbol;Acc:10007]	rhomboid, veinlet-like 1 (Drosophila) [Source:ZFIN;Acc:ZDB-GENE-120529-2]
gene25483	-2.2574	6.3764	-4.10046	0.000223544	0.0135537	0.506515	LOC101474189	ryr2	ryanodine receptor 2%2C transcript variant X1	NW_020192337.1	139640	462320	322681	RYR2	ryanodine receptor 2 (cardiac) [Source:HGNC Symbol;Acc:10484]	ryanodine receptor 1a (skeletal) [Source:ZFIN;Acc:ZDB-GENE-020108-2]
gene4963	-2.77186	3.74636	-4.07276	0.000242514	0.014044	0.505827	LOC101475509	vamp3	vesicle associated membrane protein 3	NC_036784.1	13408354	13422219	13866	VAMP3	vesicle-associated membrane protein 3 [Source:HGNC Symbol;Acc:12644]	vesicle-associated membrane protein 3 (cellubrevin) [Source:ZFIN;Acc:ZDB-GENE-040625-45]
gene15037	-2.73863	4.39739	-4.06865	0.000245458	0.014075	0.492765	LOC101482034	LOC101482034	protein quaking-B	NC_036792.1	28829782	28849453	19672	QKI	QKI, KH domain containing, RNA binding [Source:HGNC Symbol;Acc:21100]	QKI, KH domain containing, RNA binding b [Source:ZFIN;Acc:ZDB-GENE-081028-54]
gene17238	3.09303	1.71337	4.07037	0.00024422	0.014053	0.482662	LOC101465114	ankle1	ankyrin repeat and LEM domain containing 1%2C transcript variant X1	NC_036794.1	29645088	29661698	16611	ANKLE1	ankyrin repeat and LEM domain containing 1 [Source:HGNC Symbol;Acc:26812]	ankyrin repeat and LEM domain containing 1 [Source:HGNC Symbol;Acc:26812]
gene2954	-2.32352	5.63272	-4.06767	0.000246165	0.014075	0.477795	LOC101473428	slc24a2	solute carrier family 24 member 2%2C transcript variant X1	NC_036782.1	26759053	26808030	48978	SLC24A2	solute carrier family 24 (sodium/potassium/calcium exchanger), member 2 [Source:HGNC Symbol;Acc:10976]	solute carrier family 24 (sodium/potassium/calcium exchanger), member 2 [Source:HGNC Symbol;Acc:10976]
gene543	-2.80431	3.19407	-4.05979	0.000251922	0.0142417	0.474039	LOC101466579	LOC101466579	tripartite motif-containing protein 66%2C transcript variant X2	NC_036780.1	20193322	20211418	18097	TRIM66	tripartite motif containing 66 [Source:HGNC Symbol;Acc:29005]	tripartite motif containing 66 [Source:ZFIN;Acc:ZDB-GENE-040724-145]
gene8393	-2.52082	3.08144	-4.05896	0.000252539	0.0142417	0.471738	LOC101485662	cdc37l1	cell division cycle 37 like 1	NC_036786.1	39538620	39554149	15530	CDC37L1	cell division cycle 37-like 1 [Source:HGNC Symbol;Acc:17179]	CDC37 cell division cycle 37 homolog (S. cerevisiae)-like 1 [Source:ZFIN;Acc:ZDB-GENE-030131-8865]
gene7821	-3.03495	3.9564	-4.05765	0.000253516	0.0142417	0.467457	LOC101486253	LOC101486253	plexin-B2%2C transcript variant X1	NC_036786.1	17797885	17936327	138443	PLXNB2	plexin B2 [Source:HGNC Symbol;Acc:9104]	plexin b2a [Source:ZFIN;Acc:ZDB-GENE-030131-8917]
gene9344	-2.36401	5.35968	-4.05768	0.000253488	0.0142417	0.462483	LOC105941047	LOC105941047	uncharacterized LOC105941047	NC_036787.1	4223934	4227846	3913	NA	NA	NA
gene6460	-2.67392	3.17671	-4.05222	0.000257581	0.014363	0.454216	LOC101477603	LOC101477603	mast/stem cell growth factor receptor kita%2C transcript variant X1	NC_036785.1	21437701	21456499	18799	KIT	v-kit Hardy-Zuckerman 4 feline sarcoma viral oncogene homolog [Source:HGNC Symbol;Acc:6342]	kit receptor b [Source:ZFIN;Acc:ZDB-GENE-050916-2]
gene21753	-1.83791	6.51323	-4.09279	0.000228645	0.0137248	0.450747	LOC101465971	LOC101465971	rho-related GTP-binding protein RhoA-B	NC_036799.1	8300941	8315368	14428	RHOA	ras homolog family member A [Source:HGNC Symbol;Acc:667]	ras homolog gene family, member Ab [Source:ZFIN;Acc:ZDB-GENE-040322-2]
gene19703	-2.53691	2.48011	-4.05087	0.000258606	0.014363	0.449584	LOC101483211	LOC101483211	NAD kinase%2C transcript variant X1	NC_036797.1	9766846	9778866	12021	NADK	NAD kinase [Source:HGNC Symbol;Acc:29831]	NAD kinase b [Source:ZFIN;Acc:ZDB-GENE-061103-433]
gene8057	-2.54078	5.70679	-4.05351	0.000256609	0.0143542	0.444869	LOC101484805	ckap5	cytoskeleton associated protein 5%2C transcript variant X1	NC_036786.1	26101590	26143512	41923	CKAP5	cytoskeleton associated protein 5 [Source:HGNC Symbol;Acc:28959]	cytoskeleton associated protein 5 [Source:HGNC Symbol;Acc:28959]
gene9556	-1.40651	7.43784	-4.13463	0.000202138	0.0129512	0.43817	LOC101484958	LOC101484958	liprin-alpha-3%2C transcript variant X1	NC_036787.1	9361061	9386553	25493	PPFIA3	protein tyrosine phosphatase, receptor type, f polypeptide (PTPRF), interacting protein (liprin), alpha 3 [Source:HGNC Symbol;Acc:9247]	Uncharacterized protein [Source:UniProtKB/TrEMBL;Acc:E7F905]
gene25575	-2.57215	3.32642	-4.04469	0.000263333	0.0144427	0.434374	LOC101488060	eml5	echinoderm microtubule associated protein like 5%2C transcript variant X1	NW_020192340.1	488834	538623	49790	EML5	echinoderm microtubule associated protein like 5 [Source:HGNC Symbol;Acc:18197]	echinoderm microtubule associated protein like 5 [Source:HGNC Symbol;Acc:18197]
gene2913	-2.46744	2.46456	-4.04064	0.000266477	0.0144427	0.422877	LOC101471873	LOC101471873	ciliary neurotrophic factor	NC_036782.1	23752393	23758350	5958	CNTF	ciliary neurotrophic factor [Source:HGNC Symbol;Acc:2169]	NA
gene17685	-2.76559	3.83112	-4.03999	0.000266984	0.0144427	0.42113	LOC101483631	fbxl3	F-box and leucine rich repeat protein 3	NC_036795.1	11667476	11675442	7967	FBXL3	F-box and leucine-rich repeat protein 3 [Source:HGNC Symbol;Acc:13599]	F-box and leucine-rich repeat protein 3 [Source:HGNC Symbol;Acc:13599]
gene6395	-2.13257	6.04272	-4.05725	0.00025381	0.0142417	0.417702	LOC101473691	LOC101473691	testican-3%2C transcript variant X1	NC_036785.1	19345269	19363149	17881	SPOCK3	sparc/osteonectin, cwcv and kazal-like domains proteoglycan (testican) 3 [Source:HGNC Symbol;Acc:13565]	sparc/osteonectin, cwcv and kazal-like domains proteoglycan (testican) 3 [Source:ZFIN;Acc:ZDB-GENE-090311-24]
gene20544	-2.44043	6.70229	-4.07335	0.000242096	0.014044	0.41617	LOC101464333	ckb	creatine kinase B%2C transcript variant X2	NC_036798.1	4917375	4922318	4944	CKB	creatine kinase, brain [Source:HGNC Symbol;Acc:1991]	creatine kinase, brain a [Source:ZFIN;Acc:ZDB-GENE-060929-902]
gene5953	1.41119	6.57068	4.1216	0.000210057	0.0132241	0.401819	LOC101483560	LOC101483560	transcription factor IIIA	NC_036785.1	4822526	4824187	1662	GTF3A	general transcription factor IIIA [Source:HGNC Symbol;Acc:4662]	general transcription factor IIIAa [Source:ZFIN;Acc:ZDB-GENE-041006-1]
gene22492	-1.70311	6.36416	-4.07037	0.000244224	0.014053	0.40181	LOC101468157	LOC101468157	neural cell adhesion molecule L1.1%2C transcript variant X1	NC_036799.1	29183886	29230682	46797	L1CAM	L1 cell adhesion molecule [Source:HGNC Symbol;Acc:6470]	neural adhesion molecule L1.1 [Source:ZFIN;Acc:ZDB-GENE-980526-512]
gene16930	-1.92558	6.1655	-4.0586	0.000252805	0.0142417	0.401576	LOC101470777	fabp7	fatty acid binding protein 7	NC_036794.1	19657916	19659395	1480	FABP7	fatty acid binding protein 7, brain [Source:HGNC Symbol;Acc:3562]	fatty acid binding protein 7, brain, a [Source:ZFIN;Acc:ZDB-GENE-000627-1]
gene253	-2.75902	5.29591	-4.02705	0.000277303	0.0148674	0.386654	LOC101482850	LOC101482850	protein unc-13 homolog C%2C transcript variant X1	NC_036780.1	11170321	11280114	109794	UNC13C	unc-13 homolog C (C. elegans) [Source:HGNC Symbol;Acc:23149]	unc-13 homolog C (C. elegans) [Source:ZFIN;Acc:ZDB-GENE-060503-478]
gene5617	-2.18328	5.4566	-4.03055	0.000274468	0.0147592	0.385685	LOC101477347	LOC101477347	vesicle-associated membrane protein-associated protein B/C	NC_036784.1	29840983	29865691	24709	VAPB	VAMP (vesicle-associated membrane protein)-associated protein B and C [Source:HGNC Symbol;Acc:12649]	vesicle-associated membrane protein, associated protein B and C [Source:ZFIN;Acc:ZDB-GENE-030131-2348]
gene3826	-2.12144	5.6358	-4.03405	0.000271674	0.0146526	0.382576	LOC101475764	LOC101475764	C-Jun-amino-terminal kinase-interacting protein 4%2C transcript variant X1	NC_036783.1	13074975	13099746	24772	SPAG9	sperm associated antigen 9 [Source:HGNC Symbol;Acc:14524]	sperm associated antigen 9a [Source:ZFIN;Acc:ZDB-GENE-070820-7]
gene15679	-2.51704	2.502	-4.02323	0.000280418	0.0149899	0.377958	LOC101472885	LOC101472885	rab5 GDP/GTP exchange factor%2C transcript variant X4	NC_036793.1	21510756	21519677	8922	RABGEF1	RAB guanine nucleotide exchange factor (GEF) 1 [Source:HGNC Symbol;Acc:17676]	RAB guanine nucleotide exchange factor (GEF) 1, like [Source:ZFIN;Acc:ZDB-GENE-040426-813]
gene25466	-2.53351	2.47916	-4.02177	0.000281617	0.0150096	0.374027	LOC101483422	erp44	endoplasmic reticulum protein 44	NW_020192335.1	969225	980972	11748	ERP44	endoplasmic reticulum protein 44 [Source:HGNC Symbol;Acc:18311]	endoplasmic reticulum protein 44 [Source:ZFIN;Acc:ZDB-GENE-040426-1902]
gene15622	-1.94155	6.12576	-4.04514	0.000262988	0.0144427	0.366	LOC101470963	ap2s1	adaptor related protein complex 2 sigma 1 subunit%2C transcript variant X2	NC_036793.1	19926071	19937323	11253	AP2S1	adaptor-related protein complex 2, sigma 1 subunit [Source:HGNC Symbol;Acc:565]	adaptor-related protein complex 2, sigma 1 subunit [Source:ZFIN;Acc:ZDB-GENE-040426-2174]
gene1650	-1.58766	7.01116	-4.08771	0.000232091	0.0137334	0.365589	LOC101465246	LOC101465246	protocadherin alpha-C2%2C transcript variant X1	NC_036781.1	24724695	24787246	62552	PCDHAC2	protocadherin alpha subfamily C, 2 [Source:HGNC Symbol;Acc:8677]	protocadherin 2 alpha c [Source:ZFIN;Acc:ZDB-GENE-041118-12]
gene7664	-1.95768	6.1182	-4.0402	0.000266818	0.0144427	0.356067	LOC101470916	LOC101470916	synaptotagmin-7%2C transcript variant X1	NC_036786.1	14127113	14220596	93484	SYT7	synaptotagmin VII [Source:HGNC Symbol;Acc:11514]	synaptotagmin VII [Source:HGNC Symbol;Acc:11514]
gene736	-1.52628	7.29761	-4.09668	0.000226046	0.013614	0.353844	LOC101467341	scg3	secretogranin III%2C transcript variant X1	NC_036780.1	26835256	26848757	13502	SCG3	secretogranin III [Source:HGNC Symbol;Acc:13707]	secretogranin III [Source:ZFIN;Acc:ZDB-GENE-040426-1725]
gene2783	-2.59038	3.10684	-4.00941	0.000291989	0.0154712	0.342483	LOC101476176	fis1	fission%2C mitochondrial 1	NC_036782.1	19856355	19861495	5141	FIS1	fission 1 (mitochondrial outer membrane) homolog (S. cerevisiae) [Source:HGNC Symbol;Acc:21689]	fission 1 (mitochondrial outer membrane) homolog (S. cerevisiae) [Source:HGNC Symbol;Acc:21689]
gene831	-2.49384	5.88274	-4.01754	0.00028513	0.0151521	0.33511	LOC101463950	madd	MAP kinase activating death domain%2C transcript variant X1	NC_036780.1	30131076	30185356	54281	MADD	MAP-kinase activating death domain [Source:HGNC Symbol;Acc:6766]	MAP-kinase activating death domain [Source:ZFIN;Acc:ZDB-GENE-030131-8076]
gene7713	-2.55353	2.92334	-4.00415	0.000296512	0.0155907	0.328762	LOC101478741	LOC101478741	CTD small phosphatase-like protein 2-A%2C transcript variant X2	NC_036786.1	14906473	14919371	12899	CTDSPL2	CTD (carboxy-terminal domain, RNA polymerase II, polypeptide A) small phosphatase like 2 [Source:HGNC Symbol;Acc:26936]	CTD (carboxy-terminal domain, RNA polymerase II, polypeptide A) small phosphatase like 2a [Source:ZFIN;Acc:ZDB-GENE-061013-647]
gene6886	-2.69959	3.25018	-4.00378	0.000296835	0.0155907	0.327846	LOC101477314	prdx2	peroxiredoxin 2	NC_036785.1	31201181	31205641	4461	PRDX2	peroxiredoxin 2 [Source:HGNC Symbol;Acc:9353]	peroxiredoxin 2 [Source:ZFIN;Acc:ZDB-GENE-030326-2]
gene9987	-2.69941	4.166	-4.00176	0.000298594	0.0155952	0.319894	LOC101472783	tbkbp1	TBK1 binding protein 1	NC_036787.1	20438647	20510134	71488	TBKBP1	TBK1 binding protein 1 [Source:HGNC Symbol;Acc:30140]	TBK1 binding protein 1 [Source:HGNC Symbol;Acc:30140]
gene19142	-2.87909	3.65974	-4.00066	0.000299553	0.0155952	0.319712	LOC101473056	ifrd1	interferon related developmental regulator 1	NC_036796.1	28587867	28595956	8090	IFRD1	interferon-related developmental regulator 1 [Source:HGNC Symbol;Acc:5456]	interferon-related developmental regulator 1 [Source:ZFIN;Acc:ZDB-GENE-030131-6132]
gene5029	-2.77657	3.84748	-3.99985	0.000300263	0.0155952	0.317136	LOC101482667	pfdn5	prefoldin subunit 5	NC_036784.1	15058208	15061774	3567	PFDN5	prefoldin subunit 5 [Source:HGNC Symbol;Acc:8869]	prefoldin 5 [Source:ZFIN;Acc:ZDB-GENE-030131-6858]
gene12470	-2.8437	4.04854	-3.99972	0.000300372	0.0155952	0.315728	LOC105940905	LOC105940905	uncharacterized LOC105940905%2C transcript variant X1	NC_036790.1	19862945	19870352	7408	NA	NA	NA
gene26187	-2.49069	2.87911	-3.99006	0.000308969	0.0159044	0.292188	LOC101470835	LOC101470835	serine incorporator 1	NW_020192373.1	243320	254632	11313	SERINC2	serine incorporator 2 [Source:HGNC Symbol;Acc:23231]	serine incorporator 2, like [Source:ZFIN;Acc:ZDB-GENE-100921-58]
gene22280	-2.18668	5.5261	-3.994	0.000305436	0.0157709	0.285201	LOC101471407	cs	citrate synthase	NC_036799.1	22644386	22661123	16738	CS	citrate synthase [Source:HGNC Symbol;Acc:2422]	citrate synthase [Source:ZFIN;Acc:ZDB-GENE-030131-1058]
gene5145	-2.72198	3.85196	-3.98508	0.000313495	0.0160817	0.278238	LOC101468049	ssu72	SSU72 homolog%2C RNA polymerase II CTD phosphatase	NC_036784.1	17206257	17211094	4838	SSU72	SSU72 RNA polymerase II CTD phosphatase homolog (S. cerevisiae) [Source:HGNC Symbol;Acc:25016]	SSU72 RNA polymerase II CTD phosphatase homolog (S. cerevisiae) [Source:ZFIN;Acc:ZDB-GENE-040426-1689]
gene13889	-2.52876	3.08335	-3.98432	0.000314193	0.0160817	0.277263	LOC101484837	LOC101484837	kinase suppressor of Ras 2%2C transcript variant X2	NC_036791.1	28358116	28415887	57772	NA	NA	NA
gene12414	-1.72425	6.75184	-4.0406	0.000266509	0.0144427	0.272773	LOC101477171	vamp1	vesicle associated membrane protein 1	NC_036790.1	19030448	19035465	5018	VAMP1	vesicle-associated membrane protein 1 (synaptobrevin 1) [Source:HGNC Symbol;Acc:12642]	vesicle-associated membrane protein 1 [Source:ZFIN;Acc:ZDB-GENE-040426-2725]
gene6356	-2.53619	2.50065	-3.98133	0.000316944	0.0161634	0.269406	LOC101465948	LOC101465948	dnaJ homolog subfamily A member 1	NC_036785.1	17802903	17810847	7945	DNAJA1	DnaJ (Hsp40) homolog, subfamily A, member 1 [Source:HGNC Symbol;Acc:5229]	DnaJ (Hsp40) homolog, subfamily A, member 1, like [Source:ZFIN;Acc:ZDB-GENE-030131-2642]
gene21538	-2.58582	2.91182	-3.97811	0.000319939	0.0162378	0.261054	LOC101467502	LOC101467502	la-related protein 4%2C transcript variant X1	NC_036799.1	3514900	3528059	13160	LARP4	La ribonucleoprotein domain family, member 4 [Source:HGNC Symbol;Acc:24320]	La ribonucleoprotein domain family, member 4Aa [Source:ZFIN;Acc:ZDB-GENE-090313-50]
gene18134	-3.13044	5.07474	-3.97283	0.000324903	0.0164436	0.247541	LOC101472453	LOC101472453	TSC22 domain family protein 1%2C transcript variant X1	NC_036795.1	24031338	24073193	41856	TSC22D1	TSC22 domain family, member 1 [Source:HGNC Symbol;Acc:16826]	TSC22 domain family 2 [Source:ZFIN;Acc:ZDB-GENE-031001-12]
gene145	1.52351	7.75668	4.11022	0.000217217	0.0133047	0.237964	LOC101472969	pdpr	pyruvate dehydrogenase phosphatase regulatory subunit	NC_036780.1	6297287	6308849	11563	PDPR	pyruvate dehydrogenase phosphatase regulatory subunit [Source:HGNC Symbol;Acc:30264]	Uncharacterized protein [Source:UniProtKB/TrEMBL;Acc:E7FC79]
gene12095	-3.10896	4.56312	-3.96684	0.00033063	0.0166402	0.230849	LOC101481884	ibtk	inhibitor of Bruton tyrosine kinase%2C transcript variant X1	NC_036790.1	12826233	12849806	23574	IBTK	inhibitor of Bruton agammaglobulinemia tyrosine kinase [Source:HGNC Symbol;Acc:17853]	inhibitor of Bruton agammaglobulinemia tyrosine kinase [Source:ZFIN;Acc:ZDB-GENE-030131-6246]
gene1407	-2.44246	2.43627	-3.95417	0.000343061	0.0171331	0.199058	LOC101487703	sh3tc2	SH3 domain and tetratricopeptide repeats 2%2C transcript variant X1	NC_036781.1	18905674	18923414	17741	SH3TC2	SH3 domain and tetratricopeptide repeats 2 [Source:HGNC Symbol;Acc:29427]	SH3 domain and tetratricopeptide repeats 2 [Source:ZFIN;Acc:ZDB-GENE-081104-347]
gene18085	-2.80293	4.41407	-3.95396	0.000343269	0.0171331	0.19736	LOC106674879	LOC106674879	tubulin alpha chain	NC_036795.1	21558115	21561300	3186	TUBA1A	tubulin, alpha 1a [Source:HGNC Symbol;Acc:20766]	tubulin, alpha 8 like 3 [Source:ZFIN;Acc:ZDB-GENE-040801-77]
gene6378	-2.55994	2.49381	-3.95239	0.000344842	0.0171642	0.194636	LOC101470397	bdh2	3-hydroxybutyrate dehydrogenase 2%2C transcript variant X1	NC_036785.1	18064251	18077166	12916	BDH2	3-hydroxybutyrate dehydrogenase, type 2 [Source:HGNC Symbol;Acc:32389]	3-hydroxybutyrate dehydrogenase, type 2 [Source:ZFIN;Acc:ZDB-GENE-050417-343]
gene4968	-2.47496	3.04391	-3.95034	0.000346912	0.0172198	0.189232	LOC101478925	psma5	proteasome subunit alpha 5	NC_036784.1	13457607	13465644	8038	PSMA5	proteasome (prosome, macropain) subunit, alpha type, 5 [Source:HGNC Symbol;Acc:9534]	proteasome (prosome, macropain) subunit, alpha type,5 [Source:ZFIN;Acc:ZDB-GENE-040625-96]
gene4976	-2.43094	2.84558	-3.94905	0.000348208	0.0172368	0.185916	LOC101474642	foxp4	forkhead box P4%2C transcript variant X1	NC_036784.1	13698294	13790662	92369	FOXP4	forkhead box P4 [Source:HGNC Symbol;Acc:20842]	forkhead box P4 [Source:ZFIN;Acc:ZDB-GENE-101207-1]
gene16275	1.37487	6.68323	4.04823	0.000260611	0.0143998	0.184609	LOC101467986	polr2d	RNA polymerase II subunit D	NC_036793.1	37317023	37324296	7274	POLR2D	polymerase (RNA) II (DNA directed) polypeptide D [Source:HGNC Symbol;Acc:9191]	polymerase (RNA) II (DNA directed) polypeptide D [Source:ZFIN;Acc:ZDB-GENE-040714-2]
gene2339	-2.70902	3.62246	-3.94619	0.000351125	0.0172411	0.178663	LOC101474937	LOC101474937	palmitoyltransferase ZDHHC3	NC_036782.1	10482428	10494008	11581	ZDHHC3	zinc finger, DHHC-type containing 3 [Source:HGNC Symbol;Acc:18470]	zgc:77880 [Source:ZFIN;Acc:ZDB-GENE-040426-1901]
gene23207	-2.47267	2.45725	-3.94616	0.000351158	0.0172411	0.178488	LOC101468778	necab1	N-terminal EF-hand calcium binding protein 1	NC_036800.1	16284501	16329034	44534	NECAB1	N-terminal EF-hand calcium binding protein 1 [Source:HGNC Symbol;Acc:20983]	N-terminal EF-hand calcium binding protein 1 [Source:ZFIN;Acc:ZDB-GENE-050417-395]
gene305	-2.6587	3.32385	-3.94035	0.000357143	0.0173978	0.16342	LOC101467025	amfr	autocrine motility factor receptor	NC_036780.1	12575995	12588843	12849	AMFR	autocrine motility factor receptor, E3 ubiquitin protein ligase [Source:HGNC Symbol;Acc:463]	autocrine motility factor receptor [Source:ZFIN;Acc:ZDB-GENE-040426-2190]
gene20360	-2.47491	2.43561	-3.94026	0.000357238	0.0173978	0.163239	LOC101482275	LOC101482275	leucine-rich repeat-containing protein 24	NC_036797.1	24373857	24390214	16358	LRRC24	leucine rich repeat containing 24 [Source:HGNC Symbol;Acc:28947]	leucine rich repeat containing 24 [Source:HGNC Symbol;Acc:28947]
gene4970	-2.31967	5.29486	-3.94087	0.000356598	0.0173978	0.156901	LOC101477619	mdm4	MDM4%2C p53 regulator%2C transcript variant X3	NC_036784.1	13486830	13496366	9537	MDM4	Mdm4 p53 binding protein homolog (mouse) [Source:HGNC Symbol;Acc:6974]	transformed 3T3 cell double minute 4 homolog (mouse) [Source:ZFIN;Acc:ZDB-GENE-030131-6872]
gene16840	-2.43228	2.43805	-3.9339	0.000363907	0.0175944	0.146887	LOC101464495	scara3	scavenger receptor class A member 3	NC_036794.1	16408020	16427722	19703	SCARA3	scavenger receptor class A, member 3 [Source:HGNC Symbol;Acc:19000]	scavenger receptor class A, member 3 [Source:ZFIN;Acc:ZDB-GENE-041014-317]
gene1438	-2.51546	2.51336	-3.93362	0.000364197	0.0175944	0.146268	LOC101476572	LOC101476572	tetraspanin-17	NC_036781.1	19886153	19908723	22571	TSPAN17	tetraspanin 17 [Source:HGNC Symbol;Acc:13594]	tetraspanin 17 [Source:HGNC Symbol;Acc:13594]
gene15558	-2.13265	5.30069	-3.93834	0.000359235	0.017448	0.145893	LOC101470077	LOC101470077	protein NipSnap homolog 2	NC_036793.1	17896531	17904088	7558	GBAS	glioblastoma amplified sequence [Source:HGNC Symbol;Acc:4179]	glioblastoma amplified sequence [Source:ZFIN;Acc:ZDB-GENE-991008-18]
gene10813	-1.68286	6.43024	-3.98065	0.000317578	0.0161634	0.144919	LOC101481074	LOC101481074	14-3-3 protein gamma-1	NC_036789.1	6604177	6619198	15022	YWHAG	tyrosine 3-monooxygenase/tryptophan 5-monooxygenase activation protein, gamma polypeptide [Source:HGNC Symbol;Acc:12852]	3-monooxygenase/tryptophan 5-monooxygenase activation protein, gamma polypeptide 1 [Source:ZFIN;Acc:ZDB-GENE-011115-1]
gene21920	-2.62571	3.29433	-3.93251	0.000365382	0.0176046	0.142788	LOC101467505	LOC101467505	arf-GAP with coiled-coil%2C ANK repeat and PH domain-containing protein 3%2C transcript variant X1	NC_036799.1	14398902	14466595	67694	ACAP3	ArfGAP with coiled-coil, ankyrin repeat and PH domains 3 [Source:HGNC Symbol;Acc:16754]	ArfGAP with coiled-coil, ankyrin repeat and PH domains 3a [Source:ZFIN;Acc:ZDB-GENE-030131-1711]
gene15183	-2.79838	4.04256	-3.92823	0.000369948	0.0177772	0.131904	LOC101468961	fat3	FAT atypical cadherin 3%2C transcript variant X1	NC_036793.1	2868574	3046309	177736	FAT3	FAT tumor suppressor homolog 3 (Drosophila) [Source:HGNC Symbol;Acc:23112]	Uncharacterized protein [Source:UniProtKB/TrEMBL;Acc:F1QA09]
gene24231	-2.76083	4.05369	-3.92673	0.000371566	0.0177833	0.128077	LOC101480296	LOC101480296	methyl-CpG-binding domain protein 3%2C transcript variant X1	NC_036801.1	11371199	11381177	9979	MBD3	methyl-CpG binding domain protein 3 [Source:HGNC Symbol;Acc:6918]	methyl-CpG binding domain protein 3b [Source:ZFIN;Acc:ZDB-GENE-030131-9792]
gene5077	-2.42681	2.99321	-3.92459	0.000373883	0.0177833	0.122857	LOC101469527	LOC101469527	ras-related protein rab7%2C transcript variant X3	NC_036784.1	15840828	15849388	8561	RAB7A	RAB7A, member RAS oncogene family [Source:HGNC Symbol;Acc:9788]	RAB7, member RAS oncogene family [Source:ZFIN;Acc:ZDB-GENE-040426-1352]
gene21799	-2.4942	2.4741	-3.92225	0.000376431	0.0177833	0.117001	LOC101465067	mib2	mindbomb E3 ubiquitin protein ligase 2%2C transcript variant X4	NC_036799.1	9997323	10033109	35787	MIB2	mindbomb E3 ubiquitin protein ligase 2 [Source:HGNC Symbol;Acc:30577]	mind bomb [Source:ZFIN;Acc:ZDB-GENE-030404-2]
gene8983	-2.75174	5.04883	-3.92234	0.000376334	0.0177833	0.116549	LOC101477842	LOC101477842	protein SET	NC_036786.1	57768404	57775574	7171	SET	SET nuclear oncogene [Source:HGNC Symbol;Acc:10760]	SET translocation (myeloid leukemia-associated) B [Source:ZFIN;Acc:ZDB-GENE-030131-433]
gene27381	-2.72447	4.52588	-3.9147	0.000384785	0.0180579	0.0971609	LOC101474557	LOC101474557	netrin receptor UNC5C	NW_020192462.1	11336	73496	62161	UNC5C	unc-5 homolog C (C. elegans) [Source:HGNC Symbol;Acc:12569]	unc-5 homolog C (C. elegans) [Source:HGNC Symbol;Acc:12569]
gene12009	-2.46374	2.46062	-3.91028	0.000389744	0.0181961	0.0862406	LOC101476094	cmc1	C-X9-C motif containing 1%2C transcript variant X1	NC_036790.1	9788472	9797024	8553	CMC1	COX assembly mitochondrial protein 1 homolog (S. cerevisiae) [Source:HGNC Symbol;Acc:28783]	COX assembly mitochondrial protein 1 homolog (S. cerevisiae) [Source:ZFIN;Acc:ZDB-GENE-040426-2626]
gene24226	-2.43323	2.42	-3.90842	0.000391858	0.0182477	0.0814265	LOC101478126	pias4	protein inhibitor of activated STAT 4	NC_036801.1	11279784	11292680	12897	PIAS4	protein inhibitor of activated STAT, 4 [Source:HGNC Symbol;Acc:17002]	protein inhibitor of activated STAT, 4a [Source:ZFIN;Acc:ZDB-GENE-040426-2734]
gene1832	-2.6993	3.74256	-3.90259	0.000398538	0.0183406	0.0664847	LOC101485693	atp11c	ATPase phospholipid transporting 11C	NC_036781.1	28707355	28748684	41330	ATP11C	ATPase, class VI, type 11C [Source:HGNC Symbol;Acc:13554]	ATPase, Class VI, type 11C [Source:ZFIN;Acc:ZDB-GENE-030616-51]
gene13790	-3.07853	3.95265	-3.90199	0.000399238	0.0183406	0.0648897	LOC101477344	psat1	phosphoserine aminotransferase 1	NC_036791.1	25391674	25399966	8293	PSAT1	phosphoserine aminotransferase 1 [Source:HGNC Symbol;Acc:19129]	phosphoserine aminotransferase 1 [Source:ZFIN;Acc:ZDB-GENE-030131-5723]
gene19627	-2.46124	3.04725	-3.90189	0.000399356	0.0183406	0.0641049	LOC101486423	vapa	VAMP associated protein A	NC_036797.1	7741538	7756951	15414	VAPA	VAMP (vesicle-associated membrane protein)-associated protein A, 33kDa [Source:HGNC Symbol;Acc:12648]	VAMP (vesicle-associated membrane protein)-associated protein A [Source:ZFIN;Acc:ZDB-GENE-030131-6540]
gene9719	1.18417	7.64737	4.0414	0.000265887	0.0144427	0.0623061	LOC101472071	zdhhc6	zinc finger DHHC-type containing 6%2C transcript variant X4	NC_036787.1	13214191	13221877	7687	ZDHHC6	zinc finger, DHHC-type containing 6 [Source:HGNC Symbol;Acc:19160]	zinc finger, DHHC-type containing 6 [Source:ZFIN;Acc:ZDB-GENE-030131-3189]
gene5838	-2.92937	2.75484	-3.90138	0.000399944	0.0183406	0.0619194	LOC101471528	LOC101471528	cytochrome P450 3A30	NC_036785.1	1154666	1162429	7764	CYP3A5	cytochrome P450, family 3, subfamily A, polypeptide 5 [Source:HGNC Symbol;Acc:2638]	cytochrome P450, family 3, subfamily A, polypeptide 65 [Source:ZFIN;Acc:ZDB-GENE-050604-1]
gene7697	-2.43786	2.4262	-3.89813	0.000403736	0.0184592	0.0550415	LOC101467377	svip	small VCP interacting protein	NC_036786.1	14684875	14689919	5045	NA	NA	NA
gene1636	-2.69806	3.72927	-3.89741	0.000404575	0.0184592	0.053196	LOC101472514	etf1	eukaryotic translation termination factor 1	NC_036781.1	24442952	24450080	7129	ETF1	eukaryotic translation termination factor 1 [Source:HGNC Symbol;Acc:3477]	eukaryotic translation termination factor 1 [Source:ZFIN;Acc:ZDB-GENE-021029-1]
gene6434	1.12182	7.99399	4.05015	0.000259151	0.014363	0.0506494	LOC101476928	rfc1	replication factor C subunit 1	NC_036785.1	20523611	20533050	9440	RFC1	replication factor C (activator 1) 1, 145kDa [Source:HGNC Symbol;Acc:9969]	replication factor C (activator 1) 1 [Source:ZFIN;Acc:ZDB-GENE-070410-99]
gene18084	-2.77988	4.00883	-3.89321	0.000409532	0.0186151	0.0422278	LOC101474424	dnajb2	DnaJ heat shock protein family (Hsp40) member B2%2C transcript variant X1	NC_036795.1	21546691	21556803	10113	DNAJB2	DnaJ (Hsp40) homolog, subfamily B, member 2 [Source:HGNC Symbol;Acc:5228]	DnaJ (Hsp40) homolog, subfamily B, member 2 [Source:HGNC Symbol;Acc:5228]
gene1466	-2.47919	2.43548	-3.89191	0.000411081	0.0186151	0.039106	LOC101487979	ergic1	endoplasmic reticulum-golgi intermediate compartment 1	NC_036781.1	20689892	20711293	21402	ERGIC1	endoplasmic reticulum-golgi intermediate compartment (ERGIC) 1 [Source:HGNC Symbol;Acc:29205]	endoplasmic reticulum-golgi intermediate compartment (ERGIC) 1 [Source:HGNC Symbol;Acc:29205]
gene12210	-2.59509	3.75704	-3.89099	0.000412171	0.0186178	0.0365582	LOC101463779	chn2	chimerin 2%2C transcript variant X1	NC_036790.1	15764453	15786064	21612	CHN2	chimerin 2 [Source:HGNC Symbol;Acc:1944]	chimerin (chimaerin) 2 [Source:ZFIN;Acc:ZDB-GENE-091020-5]
gene17264	-2.54674	5.99102	-3.90479	0.000396008	0.0183406	0.0352129	LOC101481969	pfn2	profilin 2%2C transcript variant X1	NC_036794.1	30859178	30867085	7908	PFN2	profilin 2 [Source:HGNC Symbol;Acc:8882]	profilin 2 like [Source:ZFIN;Acc:ZDB-GENE-030131-34]
gene28109	-1.93716	6.19169	-3.92177	0.000376964	0.0177833	0.0294782	LOC101465343	LOC101465343	V-type proton ATPase 116 kDa subunit a%2C transcript variant X1	NW_020192533.1	69688	98446	28759	ATP6V0A1	ATPase, H+ transporting, lysosomal V0 subunit a1 [Source:HGNC Symbol;Acc:865]	ATPase, H+ transporting, lysosomal V0 subunit a isoform 1b [Source:ZFIN;Acc:ZDB-GENE-050522-215]
gene5086	-2.48723	3.07899	-3.88761	0.000416232	0.0187543	0.0271363	LOC101465142	LOC101465142	inositol hexakisphosphate kinase 2	NC_036784.1	15937229	15942562	5334	IP6K2	inositol hexakisphosphate kinase 2 [Source:HGNC Symbol;Acc:17313]	inositol hexakisphosphate kinase 2 [Source:HGNC Symbol;Acc:17313]
gene5591	-2.86262	4.62695	-3.88669	0.000417335	0.0187553	0.025674	LOC101466321	LOC101466321	CD9 antigen	NC_036784.1	29018627	29031263	12637	TSPAN2	tetraspanin 2 [Source:HGNC Symbol;Acc:20659]	tetraspanin 2 [Source:ZFIN;Acc:ZDB-GENE-050522-511]
gene7260	-1.82696	6.05465	-3.91737	0.000381809	0.0179649	0.0237681	LOC101483062	mical3	microtubule associated monooxygenase%2C calponin and LIM domain containing 3%2C transcript variant X1	NC_036786.1	3615233	3692932	77700	NA	NA	microtubule associated monoxygenase, calponin and LIM domain containing 3a [Source:ZFIN;Acc:ZDB-GENE-050126-2]
gene29882	-2.52647	2.4807	-3.88502	0.000419368	0.0187553	0.0213974	LOC101483952	snrpf	small nuclear ribonucleoprotein polypeptide F	NW_020192855.1	52762	55751	2990	SNRPF	small nuclear ribonucleoprotein polypeptide F [Source:HGNC Symbol;Acc:11162]	small nuclear ribonucleoprotein polypeptide F [Source:ZFIN;Acc:ZDB-GENE-040930-9]
gene7431	-1.92632	6.08424	-3.91323	0.000386429	0.0180881	0.0156741	LOC101478687	LOC101478687	serine/threonine-protein kinase WNK1%2C transcript variant X1	NC_036786.1	8622649	8650620	27972	CNTD1	cyclin N-terminal domain containing 1 [Source:HGNC Symbol;Acc:26847]	cyclin N-terminal domain containing 1 [Source:HGNC Symbol;Acc:26847]
gene6603	1.39802	6.33849	3.97142	0.00032624	0.0164651	0.0108691	LOC101471796	ten1	TEN1%2C CST complex subunit%2C transcript variant X1	NC_036785.1	25025159	25030428	5270	TEN1	TEN1 telomerase capping complex subunit homolog (S. cerevisiae) [Source:HGNC Symbol;Acc:37242]	NA
gene22136	-2.63673	2.94205	-3.88102	0.000424253	0.0188803	0.00962603	LOC101464855	scube3	signal peptide%2C CUB domain and EGF like domain containing 3	NC_036799.1	19735820	19812380	76561	SCUBE3	signal peptide, CUB domain, EGF-like 3 [Source:HGNC Symbol;Acc:13655]	signal peptide, CUB domain, EGF-like 3 [Source:ZFIN;Acc:ZDB-GENE-060717-1]
gene14807	-2.01764	5.64611	-3.89238	0.000410513	0.0186151	0.00177775	LOC101479553	psap	prosaposin%2C transcript variant X1	NC_036792.1	20924229	20932504	8276	PSAP	prosaposin [Source:HGNC Symbol;Acc:9498]	prosaposin [Source:ZFIN;Acc:ZDB-GENE-020108-1]
gene18485	-2.05156	6.24349	-3.90225	0.000398935	0.0183406	-0.0256128	LOC101479438	nap1l1	nucleosome assembly protein 1 like 1%2C transcript variant X2	NC_036796.1	3081142	3104386	23245	NAP1L4	nucleosome assembly protein 1-like 4 [Source:HGNC Symbol;Acc:7640]	nucleosome assembly protein 1, like 1 [Source:ZFIN;Acc:ZDB-GENE-030516-2]
gene911	1.27495	7.25153	3.99393	0.000305503	0.0157709	-0.028231	LOC101466577	vps33b	VPS33B%2C late endosome and lysosome associated%2C transcript variant X2	NC_036780.1	34421167	34434062	12896	VPS33B	vacuolar protein sorting 33 homolog B (yeast) [Source:HGNC Symbol;Acc:12712]	vacuolar protein sorting 33B [Source:ZFIN;Acc:ZDB-GENE-050327-73]
gene7495	-1.61297	7.09095	-3.94702	0.000350278	0.0172411	-0.0313161	LOC101465466	LOC101465466	dnaJ homolog subfamily A member 2	NC_036786.1	10469956	10476995	7040	DNAJB11	DnaJ (Hsp40) homolog, subfamily B, member 11 [Source:HGNC Symbol;Acc:14889]	DnaJ (Hsp40) homolog, subfamily B, member 11 [Source:ZFIN;Acc:ZDB-GENE-031113-9]
gene19543	-2.43093	2.82929	-3.86298	0.000446981	0.0196977	-0.0358278	LOC101485747	LOC101485747	SLAM family member 5	NC_036797.1	5891862	5912138	20277	NA	NA	NA
gene23356	-2.52691	2.86169	-3.86116	0.00044934	0.0197535	-0.0407601	LOC101464298	hepacam2	HEPACAM family member 2%2C transcript variant X2	NC_036800.1	19368334	19382039	13706	HEPACAM2	HEPACAM family member 2 [Source:HGNC Symbol;Acc:27364]	HEPACAM family member 2 [Source:ZFIN;Acc:ZDB-GENE-060503-135]
gene21624	-2.67685	2.98294	-3.8586	0.000452674	0.0197689	-0.048513	LOC101470520	pex14	peroxisomal biogenesis factor 14	NC_036799.1	5349131	5394275	45145	PEX14	peroxisomal biogenesis factor 14 [Source:HGNC Symbol;Acc:8856]	peroxisomal biogenesis factor 14 [Source:ZFIN;Acc:ZDB-GENE-060130-169]
gene844	-2.50234	2.84939	-3.85754	0.000454068	0.0197689	-0.0499543	LOC101468713	ttc17	tetratricopeptide repeat domain 17	NC_036780.1	30822211	30850159	27949	TTC17	tetratricopeptide repeat domain 17 [Source:HGNC Symbol;Acc:25596]	Uncharacterized protein [Source:UniProtKB/TrEMBL;Acc:E7F211]
gene19215	1.18243	7.87822	4.00489	0.000295873	0.0155907	-0.0651585	LOC101463741	casc1	cancer susceptibility 1%2C transcript variant X1	NC_036796.1	32137101	32148132	11032	CASC1	cancer susceptibility candidate 1 [Source:HGNC Symbol;Acc:29599]	cancer susceptibility candidate 1 [Source:ZFIN;Acc:ZDB-GENE-041210-153]
gene23808	-2.66825	4.42835	-3.85002	0.000464041	0.0200327	-0.0679464	LOC101475272	LOC101475272	epidermal growth factor receptor substrate 15%2C transcript variant X1	NC_036801.1	1877093	1901727	24635	EPS15	epidermal growth factor receptor pathway substrate 15 [Source:HGNC Symbol;Acc:3419]	epidermal growth factor receptor pathway substrate 15 [Source:ZFIN;Acc:ZDB-GENE-081104-264]
gene14339	-1.59515	6.84208	-3.92268	0.000375969	0.0177833	-0.0690156	LOC101482438	nckap1	NCK associated protein 1%2C transcript variant X1	NC_036792.1	5369677	5407088	37412	NCKAP1	NCK-associated protein 1 [Source:HGNC Symbol;Acc:7666]	NCK-associated protein 1 [Source:ZFIN;Acc:ZDB-GENE-030131-4426]
gene14371	-2.56756	2.53767	-3.84716	0.000467889	0.0200327	-0.0757805	LOC101474309	fam96b	family with sequence similarity 96 member B	NC_036792.1	7032539	7035012	2474	FAM96B	family with sequence similarity 96, member B [Source:HGNC Symbol;Acc:24261]	family with sequence similarity 96, member B [Source:ZFIN;Acc:ZDB-GENE-040718-148]
gene769	-2.79306	3.53983	-3.84559	0.00047002	0.0200564	-0.0802075	LOC101482831	LOC101482831	EGF-like repeat and discoidin I-like domain-containing protein 3%2C transcript variant X1	NC_036780.1	27638982	27648609	9628	MFGE8	milk fat globule-EGF factor 8 protein [Source:HGNC Symbol;Acc:7036]	milk fat globule-EGF factor 8 protein a [Source:ZFIN;Acc:ZDB-GENE-050327-9]
gene11194	-2.99676	4.36791	-3.8443	0.000471771	0.0200564	-0.0824389	LOC101482903	sod1	superoxide dismutase 1	NC_036789.1	15445126	15449059	3934	SOD1	superoxide dismutase 1, soluble [Source:HGNC Symbol;Acc:11179]	superoxide dismutase 1, soluble [Source:ZFIN;Acc:ZDB-GENE-990415-258]
gene29770	3.1463	2.84164	3.83809	0.0004803	0.020371	-0.0987349	LOC112432429	LOC112432429	uncharacterized LOC112432429	NW_020192827.1	40885	41983	1099	NA	NA	Uncharacterized protein [Source:UniProtKB/TrEMBL;Acc:F1QPM4]
gene4383	2.44611	4.6964	3.86325	0.00044664	0.0196977	-0.103088	LOC101474770	LOC101474770	eukaryotic translation initiation factor 3 subunit D%2C transcript variant X1	NC_036783.1	25991653	25999959	8307	EIF3D	eukaryotic translation initiation factor 3, subunit D [Source:HGNC Symbol;Acc:3278]	eukaryotic translation initiation factor 3, subunit D [Source:ZFIN;Acc:ZDB-GENE-030131-8442]
gene1323	-1.67142	6.40676	-3.88552	0.000418761	0.0187553	-0.110817	LOC101468521	LOC101468521	serine/threonine-protein phosphatase 2B catalytic subunit alpha isoform%2C transcript variant X1	NC_036781.1	16157493	16192664	35172	PPP3CA	protein phosphatase 3, catalytic subunit, alpha isozyme [Source:HGNC Symbol;Acc:9314]	protein phosphatase 3, catalytic subunit, beta isozyme [Source:ZFIN;Acc:ZDB-GENE-050417-406]
gene4366	-2.276	5.75939	-3.84796	0.000466812	0.0200327	-0.111514	LOC101481934	akt1s1	AKT1 substrate 1	NC_036783.1	25385735	25394407	8673	NA	NA	NA
gene15196	-2.58034	4.07067	-3.83134	0.000489744	0.0206745	-0.115507	LOC101479468	ulk2	unc-51 like autophagy activating kinase 2	NC_036793.1	4021110	4055013	33904	ULK2	unc-51-like kinase 2 (C. elegans) [Source:HGNC Symbol;Acc:13480]	unc-51-like kinase 1b (C. elegans) [Source:ZFIN;Acc:ZDB-GENE-071203-2]
gene3472	-1.8955	5.89644	-3.85374	0.000459078	0.019939	-0.125931	LOC101487693	abat	4-aminobutyrate aminotransferase	NC_036783.1	5277265	5308273	31009	ABAT	4-aminobutyrate aminotransferase [Source:HGNC Symbol;Acc:23]	4-aminobutyrate aminotransferase [Source:ZFIN;Acc:ZDB-GENE-031006-4]
gene23924	2.8921	1.34678	3.8296	0.000492204	0.0207299	-0.13187	LOC101466349	rnf126	ring finger protein 126	NC_036801.1	4428329	4435433	7105	RNF126	ring finger protein 126 [Source:HGNC Symbol;Acc:21151]	ring finger protein 126 [Source:ZFIN;Acc:ZDB-GENE-070209-292]
gene23150	-1.91648	5.75797	-3.84483	0.000471047	0.0200564	-0.137262	LOC101470299	LOC101470299	synaptic vesicle glycoprotein 2A%2C transcript variant X1	NC_036800.1	15020388	15044201	23814	SV2A	synaptic vesicle glycoprotein 2A [Source:HGNC Symbol;Acc:20566]	synaptic vesicle glycoprotein 2A [Source:HGNC Symbol;Acc:20566]
gene14071	-2.48118	3.25194	-3.81645	0.000511219	0.021378	-0.154544	LOC101479226	fubp3	far upstream element binding protein 3%2C transcript variant X1	NC_036791.1	33314105	33341335	27231	FUBP3	far upstream element (FUSE) binding protein 3 [Source:HGNC Symbol;Acc:4005]	far upstream element (FUSE) binding protein 3 [Source:HGNC Symbol;Acc:4005]
gene13568	-2.51995	2.87222	-3.81635	0.000511371	0.021378	-0.155715	LOC101476700	vps13a	vacuolar protein sorting 13 homolog A%2C transcript variant X1	NC_036791.1	18959018	19005844	46827	VPS13A	vacuolar protein sorting 13 homolog A (S. cerevisiae) [Source:HGNC Symbol;Acc:1908]	vacuolar protein sorting 13 homolog A (S. cerevisiae) [Source:ZFIN;Acc:ZDB-GENE-030926-1]
gene1005	-2.58453	3.35029	-3.81396	0.000514891	0.0214259	-0.161646	LOC101469434	LOC101469434	protocadherin-10%2C transcript variant X1	NC_036781.1	87951	105912	17962	PCDH10	protocadherin 10 [Source:HGNC Symbol;Acc:13404]	protocadherin 10b [Source:ZFIN;Acc:ZDB-GENE-030721-4]
gene211	-2.587	3.43702	-3.81332	0.000515844	0.0214259	-0.162114	LOC101474339	irx3	iroquois homeobox 3%2C transcript variant X1	NC_036780.1	9470210	9473544	3335	IRX3	iroquois homeobox 3 [Source:HGNC Symbol;Acc:14360]	iroquois homeobox protein 3a [Source:ZFIN;Acc:ZDB-GENE-991119-5]
gene11852	-2.50852	2.47182	-3.81023	0.000520454	0.0215678	-0.169554	LOC101474658	LOC101474658	dysbindin-A	NC_036790.1	3831498	3842001	10504	DBNDD2	dysbindin (dystrobrevin binding protein 1) domain containing 2 [Source:HGNC Symbol;Acc:15881]	dystrobrevin binding protein 1a [Source:ZFIN;Acc:ZDB-GENE-040426-1036]
gene10964	-2.75299	4.38795	-3.80502	0.00052831	0.0217438	-0.182026	LOC101464690	cwc15	CWC15 spliceosome associated protein homolog	NC_036789.1	10999856	11002787	2932	NA	NA	zgc:86607 [Source:ZFIN;Acc:ZDB-GENE-040625-10]
gene9460	-2.52028	3.09032	-3.80545	0.000527667	0.0217438	-0.183743	LOC101467127	prkar1a	protein kinase cAMP-dependent type I regulatory subunit alpha	NC_036787.1	7611864	7622841	10978	PRKAR1A	protein kinase, cAMP-dependent, regulatory, type I, alpha [Source:HGNC Symbol;Acc:9388]	protein kinase, cAMP-dependent, regulatory, type I, alpha (tissue specific extinguisher 1) b [Source:ZFIN;Acc:ZDB-GENE-050417-238]
gene21105	-1.99319	6.59719	-3.85979	0.000451124	0.0197689	-0.188065	LOC101466185	dync1h1	dynein cytoplasmic 1 heavy chain 1%2C transcript variant X1	NC_036798.1	20020363	20047361	26999	DYNC1H1	dynein, cytoplasmic 1, heavy chain 1 [Source:HGNC Symbol;Acc:2961]	dynein, cytoplasmic 1, heavy chain 1 [Source:HGNC Symbol;Acc:2961]
gene10791	-1.59535	7.0219	-3.88373	0.000420936	0.018779	-0.197715	LOC101464789	LOC101464789	heat shock cognate 71 kDa protein	NC_036789.1	4639783	4643939	4157	HSPA8	heat shock 70kDa protein 8 [Source:HGNC Symbol;Acc:5241]	heat shock protein 8 [Source:ZFIN;Acc:ZDB-GENE-990415-92]
gene5571	-2.7438	5.20792	-3.79858	0.000538189	0.0220499	-0.203758	LOC101483856	LOC101483856	synaptotagmin-2%2C transcript variant X3	NC_036784.1	28642566	28671732	29167	SYT2	synaptotagmin II [Source:HGNC Symbol;Acc:11510]	synaptotagmin II [Source:HGNC Symbol;Acc:11510]
gene3689	-2.67874	3.7638	-3.79604	0.000542147	0.0221618	-0.205329	LOC101485837	grin2a	glutamate ionotropic receptor NMDA type subunit 2A	NC_036783.1	10139893	10319271	179379	GRIN2A	glutamate receptor, ionotropic, N-methyl D-aspartate 2A [Source:HGNC Symbol;Acc:4585]	glutamate receptor, ionotropic, N-methyl D-aspartate 2A, a [Source:ZFIN;Acc:ZDB-GENE-070424-129]
gene740	-1.92229	6.0857	-3.82595	0.000497411	0.0209005	-0.218664	LOC101469436	dmxl2	Dmx like 2%2C transcript variant X1	NC_036780.1	26902468	26943886	41419	DMXL2	Dmx-like 2 [Source:HGNC Symbol;Acc:2938]	Dmx-like 2 [Source:HGNC Symbol;Acc:2938]
gene25869	-1.80751	6.58744	-3.84788	0.000466913	0.0200327	-0.22638	LOC101486280	LOC101486280	glutamate receptor U1%2C transcript variant X1	NW_020192355.1	674609	702094	27486	GRIA4	glutamate receptor, ionotropic, AMPA 4 [Source:HGNC Symbol;Acc:4574]	si:ch211-251b21.1 [Source:ZFIN;Acc:ZDB-GENE-060809-5]
gene11222	-2.13014	5.80967	-3.80852	0.000523025	0.0216247	-0.226844	LOC101471959	LOC101471959	serine/threonine-protein kinase DCLK1%2C transcript variant X5	NC_036789.1	16135699	16186544	50846	STK33	serine/threonine kinase 33 [Source:HGNC Symbol;Acc:14568]	serine/threonine kinase 33 [Source:ZFIN;Acc:ZDB-GENE-040724-242]
gene14288	-2.43356	2.99813	-3.78651	0.000557201	0.0226236	-0.23108	LOC101479235	yipf4	Yip1 domain family member 4	NC_036792.1	2672957	2681384	8428	YIPF4	Yip1 domain family, member 4 [Source:HGNC Symbol;Acc:28145]	Yip1 domain family, member 4 [Source:ZFIN;Acc:ZDB-GENE-040426-2253]
gene1021	-2.42582	3.02919	-3.78191	0.000564596	0.0227704	-0.243104	LOC101463986	LOC101463986	storkhead-box protein 2%2C transcript variant X1	NC_036781.1	619489	671735	52247	STOX2	storkhead box 2 [Source:HGNC Symbol;Acc:25450]	storkhead box 2 [Source:HGNC Symbol;Acc:25450]
gene12689	-2.69688	3.75819	-3.77742	0.000571924	0.0229634	-0.2525	LOC101483504	dctn3	dynactin subunit 3	NC_036790.1	25714841	25719945	5105	DCTN3	dynactin 3 (p22) [Source:HGNC Symbol;Acc:2713]	dynactin 3 (p22) [Source:ZFIN;Acc:ZDB-GENE-040704-65]
gene8947	-2.62129	3.75633	-3.77393	0.000577692	0.0231436	-0.261348	LOC101482567	LOC101482567	calretinin	NC_036786.1	56852157	56872799	20643	CALB2	calbindin 2 [Source:HGNC Symbol;Acc:1435]	calbindin 2a [Source:ZFIN;Acc:ZDB-GENE-040426-1677]
gene25337	-2.63038	3.73806	-3.77099	0.000582572	0.0232874	-0.268486	LOC101475560	LOC101475560	NACHT%2C LRR and PYD domains-containing protein 12	NW_020192332.1	1181334	1193941	12608	NA	NA	NA
gene18753	1.27133	6.47298	3.87444	0.00043241	0.019196	-0.268794	LOC101482757	LOC101482757	histone H4	NC_036796.1	13579090	13579723	634	HIST1H2AC	histone cluster 1, H2ac [Source:HGNC Symbol;Acc:4733]	zgc:195633 [Source:ZFIN;Acc:ZDB-GENE-081205-1]
gene12239	1.29918	7.65959	3.92353	0.000375034	0.0177833	-0.270147	LOC101475492	trip13	thyroid hormone receptor interactor 13%2C transcript variant X1	NC_036790.1	16209632	16217126	7495	TRIP13	thyroid hormone receptor interactor 13 [Source:HGNC Symbol;Acc:12307]	thyroid hormone receptor interactor 13 [Source:ZFIN;Acc:ZDB-GENE-040426-1488]
gene17935	-2.42878	2.85341	-3.7666	0.000589963	0.0235308	-0.282363	LOC101484998	sp3	Sp3 transcription factor	NC_036795.1	17699791	17711077	11287	SP3	Sp3 transcription factor [Source:HGNC Symbol;Acc:11208]	sp3a transcription factor [Source:ZFIN;Acc:ZDB-GENE-070410-111]
gene12473	-1.49429	6.6192	-3.83281	0.000487678	0.0206355	-0.287382	LOC101476614	cic	capicua transcriptional repressor%2C transcript variant X1	NC_036790.1	20060063	20104154	44092	CIC	capicua homolog (Drosophila) [Source:HGNC Symbol;Acc:14214]	capicua homolog b (Drosophila) [Source:ZFIN;Acc:ZDB-GENE-030131-1966]
gene23226	-1.50748	7.13859	-3.85811	0.000453325	0.0197689	-0.28778	LOC101487737	grina	glutamate ionotropic receptor NMDA type subunit associated protein 1	NC_036800.1	16542780	16556469	13690	GRINA	glutamate receptor, ionotropic, N-methyl D-aspartate-associated protein 1 (glutamate binding) [Source:HGNC Symbol;Acc:4589]	glutamate receptor, ionotropic, N-methyl D-aspartate-associated protein 1 (glutamate binding) [Source:HGNC Symbol;Acc:4589]
gene15594	-1.90069	5.90348	-3.7892	0.000552903	0.0224997	-0.295891	LOC101483438	ppp2r1b	protein phosphatase 2 scaffold subunit Abeta	NC_036793.1	19044467	19058697	14231	PPP2R1B	protein phosphatase 2, regulatory subunit A, beta [Source:HGNC Symbol;Acc:9303]	protein phosphatase 2 (formerly 2A), regulatory subunit A (PR 65), alpha isoform [Source:ZFIN;Acc:ZDB-GENE-040426-2700]
gene7416	-2.58756	3.0594	-3.76105	0.000599427	0.0236106	-0.296555	LOC101468881	LOC101468881	guanine nucleotide-binding protein G(i) subunit alpha-1	NC_036786.1	8324570	8336896	12327	GNAI1	guanine nucleotide binding protein (G protein), alpha inhibiting activity polypeptide 1 [Source:HGNC Symbol;Acc:4384]	guanine nucleotide binding protein (G protein), alpha inhibiting activity polypeptide a [Source:ZFIN;Acc:ZDB-GENE-030131-2229]
gene9767	-2.57254	2.54384	-3.7599	0.000601408	0.0236223	-0.298091	LOC101475974	ghitm	growth hormone inducible transmembrane protein	NC_036787.1	14562666	14568133	5468	GHITM	growth hormone inducible transmembrane protein [Source:HGNC Symbol;Acc:17281]	NA
gene17582	-2.40215	5.09948	-3.76194	0.00059789	0.0236106	-0.300551	LOC101482225	akap11	A-kinase anchoring protein 11%2C transcript variant X5	NC_036795.1	8308414	8333039	24626	AKAP11	A kinase (PRKA) anchor protein 11 [Source:HGNC Symbol;Acc:369]	NA
gene23758	-2.44188	3.37664	-3.75681	0.000606753	0.0237805	-0.304664	LOC101476407	nexn	nexilin F-actin binding protein%2C transcript variant X2	NC_036801.1	796260	805136	8877	NEXN	nexilin (F actin binding protein) [Source:HGNC Symbol;Acc:29557]	nexilin (F actin binding protein) [Source:ZFIN;Acc:ZDB-GENE-041114-92]
gene9750	-2.42709	2.4429	-3.75364	0.000612292	0.0239456	-0.312849	LOC101482547	pald1	phosphatase domain containing%2C paladin 1%2C transcript variant X3	NC_036787.1	14176103	14235085	58983	PALD1	phosphatase domain containing, paladin 1 [Source:HGNC Symbol;Acc:23530]	phosphatase domain containing, paladin 1b [Source:ZFIN;Acc:ZDB-GENE-070424-88]
gene21715	-1.6539	6.30354	-3.8033	0.00053094	0.0218023	-0.322489	LOC101480306	eif2s2	eukaryotic translation initiation factor 2 subunit beta%2C transcript variant X1	NC_036799.1	7524868	7529949	5082	EIF2S2	eukaryotic translation initiation factor 2, subunit 2 beta, 38kDa [Source:HGNC Symbol;Acc:3266]	eukaryotic translation initiation factor 2, subunit 2 beta [Source:ZFIN;Acc:ZDB-GENE-030131-3085]
gene19895	-2.76171	4.41919	-3.74613	0.000625593	0.0243604	-0.330564	LOC101475605	cacybp	calcyclin binding protein	NC_036797.1	15006321	15010451	4131	CACYBP	calcyclin binding protein [Source:HGNC Symbol;Acc:30423]	calcyclin binding protein [Source:ZFIN;Acc:ZDB-GENE-040426-2579]
gene9983	-1.78865	6.03021	-3.77965	0.000568273	0.0228676	-0.340455	LOC101471295	cdk5r1	cyclin dependent kinase 5 regulatory subunit 1%2C transcript variant X1	NC_036787.1	20269926	20275637	5712	CDK5R1	cyclin-dependent kinase 5, regulatory subunit 1 (p35) [Source:HGNC Symbol;Acc:1775]	cyclin-dependent kinase 5, regulatory subunit 1b (p35) [Source:ZFIN;Acc:ZDB-GENE-040718-220]
gene5196	-2.51005	4.32446	-3.73701	0.000642128	0.0249505	-0.353358	LOC101468372	bap1	BRCA1 associated protein 1%2C transcript variant X1	NC_036784.1	18210363	18218838	8476	BAP1	BRCA1 associated protein-1 (ubiquitin carboxy-terminal hydrolase) [Source:HGNC Symbol;Acc:950]	BRCA1 associated protein-1 (ubiquitin carboxy-terminal hydrolase) [Source:ZFIN;Acc:ZDB-GENE-050208-492]
gene20018	-2.4086	2.41134	-3.73504	0.000645766	0.025038	-0.359495	LOC101484554	LOC101484554	cAMP-specific 3'%2C5'-cyclic phosphodiesterase 4D%2C transcript variant X4	NC_036797.1	17925531	17967606	42076	PDE4C	phosphodiesterase 4C, cAMP-specific [Source:HGNC Symbol;Acc:8782]	phosphodiesterase 4C, cAMP-specific a [Source:ZFIN;Acc:ZDB-GENE-070912-373]
gene5399	-2.57105	3.63899	-3.73127	0.000652769	0.0252013	-0.368567	LOC101472418	slmap	sarcolemma associated protein%2C transcript variant X1	NC_036784.1	22550919	22633366	82448	SLMAP	sarcolemma associated protein [Source:HGNC Symbol;Acc:16643]	sarcolemma associated protein a [Source:ZFIN;Acc:ZDB-GENE-061013-184]
gene21003	-2.48885	3.22802	-3.73174	0.000651889	0.0252013	-0.371019	LOC101473458	LOC101473458	ELAV-like protein 1%2C transcript variant X1	NC_036798.1	17442586	17449942	7357	ELAVL1	ELAV (embryonic lethal, abnormal vision, Drosophila)-like 1 (Hu antigen R) [Source:HGNC Symbol;Acc:3312]	ELAV (embryonic lethal, abnormal vision, Drosophila)-like 1 (Hu antigen R) [Source:ZFIN;Acc:ZDB-GENE-990415-245]
gene7491	-2.62691	2.94683	-3.72835	0.000658239	0.025251	-0.381004	LOC101466729	LOC101466729	calumenin-B	NC_036786.1	10375835	10380041	4207	CALU	calumenin [Source:HGNC Symbol;Acc:1458]	calumenin b [Source:ZFIN;Acc:ZDB-GENE-040426-1251]
gene24332	-2.72535	2.98767	-3.7276	0.000659644	0.025251	-0.383609	LOC101486789	LOC101486789	aldehyde dehydrogenase family 9 member A1	NC_036801.1	14748421	14756064	7644	ALDH9A1	aldehyde dehydrogenase 9 family, member A1 [Source:HGNC Symbol;Acc:412]	aldehyde dehydrogenase 9 family, member A1a.1 [Source:ZFIN;Acc:ZDB-GENE-030131-1257]
gene3588	1.93802	4.57038	3.74923	0.000620073	0.0241976	-0.390578	LOC101481192	mei1	meiotic double-stranded break formation protein 1	NC_036783.1	7606178	7673628	67451	MEI1	meiosis inhibitor 1 [Source:HGNC Symbol;Acc:28613]	NA
gene6867	-2.55385	4.85739	-3.71997	0.000674189	0.0256447	-0.400147	LOC101485480	lg6h16orf45	linkage group 6 C16orf45 homolog	NC_036785.1	30932719	30945774	13056	C16orf45	chromosome 16 open reading frame 45 [Source:HGNC Symbol;Acc:19213]	zgc:158654 [Source:ZFIN;Acc:ZDB-GENE-070209-232]
gene18928	-1.60328	7.21615	-3.8157	0.000512323	0.021378	-0.405674	LOC101464395	LOC101464395	pleiotrophin%2C transcript variant X2	NC_036796.1	20372336	20425591	53256	PTN	pleiotrophin [Source:HGNC Symbol;Acc:9630]	pleiotrophin [Source:ZFIN;Acc:ZDB-GENE-030624-1]
gene4644	-2.14175	5.33994	-3.72206	0.000670162	0.0255453	-0.418771	LOC101465576	cldn19	claudin 19%2C transcript variant X2	NC_036784.1	3667242	3679914	12673	CLDN19	claudin 19 [Source:HGNC Symbol;Acc:2040]	claudin 19 [Source:ZFIN;Acc:ZDB-GENE-050417-242]
gene16780	-2.8658	4.79595	-3.7111	0.000691479	0.0260756	-0.420086	LOC101487545	atp6v1d	ATPase H+ transporting V1 subunit D	NC_036794.1	13772636	13777243	4608	ATP6V1D	ATPase, H+ transporting, lysosomal 34kDa, V1 subunit D [Source:HGNC Symbol;Acc:13527]	ATPase, H+ transporting, V1 subunit D [Source:ZFIN;Acc:ZDB-GENE-040426-727]
gene27840	-2.34098	4.95432	-3.71355	0.000686646	0.0259546	-0.421357	LOC101482552	lrrc7	leucine rich repeat containing 7%2C transcript variant X1	NW_020192506.1	161225	282114	120890	LRRC7	leucine rich repeat containing 7 [Source:HGNC Symbol;Acc:18531]	Uncharacterized protein [Source:UniProtKB/TrEMBL;Acc:E7EZZ0]
gene5329	-2.3202	2.92387	-3.70763	0.000698353	0.0261956	-0.43004	LOC101467984	LOC101467984	ADP-ribosylation factor-like protein 8B-A	NC_036784.1	20984263	20989684	5422	ARL8B	ADP-ribosylation factor-like 8B [Source:HGNC Symbol;Acc:25564]	ADP-ribosylation factor-like 8Ba [Source:ZFIN;Acc:ZDB-GENE-030131-9370]
gene21503	-2.73021	4.13224	-3.70531	0.000702977	0.026228	-0.43301	LOC101480705	LOC101480705	complement C1q-like protein 4	NC_036799.1	2826817	2836622	9806	C1QL4	complement component 1, q subcomponent-like 4 [Source:HGNC Symbol;Acc:31416]	complement component 1, q subcomponent-like 4 [Source:HGNC Symbol;Acc:31416]
gene278	-2.4978	5.23375	-3.70739	0.00069882	0.0261956	-0.442586	LOC101477684	serf2	small EDRK-rich factor 2%2C transcript variant X1	NC_036780.1	11823335	11825571	2237	NA	NA	si:ch211-39k3.2 [Source:ZFIN;Acc:ZDB-GENE-070705-180]
gene5063	-2.74009	3.59383	-3.70036	0.000712968	0.0262488	-0.448813	LOC101474825	crbn	cereblon	NC_036784.1	15584274	15606927	22654	CRBN	cereblon [Source:HGNC Symbol;Acc:30185]	cereblon [Source:ZFIN;Acc:ZDB-GENE-040822-43]
gene16785	-2.63771	4.67439	-3.69945	0.000714828	0.0262488	-0.449156	LOC101465642	slc24a4	solute carrier family 24 member 4%2C transcript variant X1	NC_036794.1	14305369	14339372	34004	SLC24A4	solute carrier family 24 (sodium/potassium/calcium exchanger), member 4 [Source:HGNC Symbol;Acc:10978]	solute carrier family 24 (sodium/potassium/calcium exchanger), member 4b [Source:ZFIN;Acc:ZDB-GENE-081031-75]
gene7484	-2.6228	4.87476	-3.70021	0.000713285	0.0262488	-0.44955	LOC101468980	LOC101468980	metabotropic glutamate receptor 3%2C transcript variant X2	NC_036786.1	10236069	10280294	44226	GRM3	glutamate receptor, metabotropic 3 [Source:HGNC Symbol;Acc:4595]	glutamate receptor, metabotropic 3 [Source:ZFIN;Acc:ZDB-GENE-061009-13]
gene7379	-2.38309	2.40285	-3.69921	0.000715322	0.0262488	-0.449554	LOC101465888	kras	KRAS proto-oncogene%2C GTPase%2C transcript variant X3	NC_036786.1	7735223	7747689	12467	HRAS	v-Ha-ras Harvey rat sarcoma viral oncogene homolog [Source:HGNC Symbol;Acc:5173]	v-Ki-ras2 Kirsten rat sarcoma viral oncogene homolog [Source:ZFIN;Acc:ZDB-GENE-040808-67]
gene24991	-2.52172	2.50514	-3.69941	0.000714914	0.0262488	-0.450411	LOC101471221	LOC101471221	muscarinic acetylcholine receptor M4	NC_036801.1	39355010	39429757	74748	CHRM4	cholinergic receptor, muscarinic 4 [Source:HGNC Symbol;Acc:1953]	cholinergic receptor, muscarinic 4a [Source:ZFIN;Acc:ZDB-GENE-090410-6]
gene17572	-2.46267	3.57881	-3.69611	0.00072167	0.0263417	-0.456559	LOC101477832	fundc1	FUN14 domain containing 1	NC_036795.1	7804297	7807334	3038	FUNDC1	FUN14 domain containing 1 [Source:HGNC Symbol;Acc:28746]	FUN14 domain containing 1 [Source:ZFIN;Acc:ZDB-GENE-040718-466]
gene4589	-2.38563	2.98475	-3.69721	0.000719408	0.0263123	-0.457167	LOC101475558	LOC101475558	pleckstrin homology domain-containing family A member 6	NC_036784.1	902798	975585	72788	PLEKHA6	pleckstrin homology domain containing, family A member 6 [Source:HGNC Symbol;Acc:17053]	pleckstrin homology domain containing, family A member 6 [Source:HGNC Symbol;Acc:17053]
gene19832	-2.59388	3.71464	-3.69371	0.000726628	0.0264159	-0.463368	LOC101473079	LOC101473079	cadherin-2	NC_036797.1	13199705	13260152	60448	CDH2	cadherin 2, type 1, N-cadherin (neuronal) [Source:HGNC Symbol;Acc:1759]	cadherin 2, neuronal [Source:ZFIN;Acc:ZDB-GENE-990415-171]
gene4318	-1.48165	6.48344	-3.76143	0.000598772	0.0236106	-0.463536	LOC101468392	LOC101468392	glial fibrillary acidic protein	NC_036783.1	24581088	24587114	6027	GFAP	glial fibrillary acidic protein [Source:HGNC Symbol;Acc:4235]	glial fibrillary acidic protein [Source:ZFIN;Acc:ZDB-GENE-990914-3]
gene17335	-1.84912	5.62321	-3.71562	0.000682612	0.0259106	-0.465443	LOC101464533	ptprf	protein tyrosine phosphatase%2C receptor type F%2C transcript variant X3	NC_036794.1	33174161	33612933	438773	PTPRF	protein tyrosine phosphatase, receptor type, F [Source:HGNC Symbol;Acc:9670]	protein tyrosine phosphatase, receptor type, f, a [Source:ZFIN;Acc:ZDB-GENE-020107-2]
gene11867	-2.73358	3.33564	-3.69438	0.00072523	0.0264159	-0.467098	LOC101486909	ldlrad4	low density lipoprotein receptor class A domain containing 4%2C transcript variant X1	NC_036790.1	4269132	4534486	265355	LDLRAD4	low density lipoprotein receptor class A domain containing 4 [Source:HGNC Symbol;Acc:1224]	low density lipoprotein receptor class A domain containing 4 [Source:ZFIN;Acc:ZDB-GENE-091230-3]
gene1127	-2.48473	3.39398	-3.68772	0.000739115	0.0266802	-0.478811	LOC101486796	elovl6	ELOVL fatty acid elongase 6	NC_036781.1	5120698	5143847	23150	ELOVL6	ELOVL fatty acid elongase 6 [Source:HGNC Symbol;Acc:15829]	ELOVL family member 6, elongation of long chain fatty acids (yeast) [Source:ZFIN;Acc:ZDB-GENE-030114-1]
gene8328	-2.38094	2.39356	-3.68661	0.000741465	0.0266802	-0.481056	LOC101483121	katnal2	katanin catalytic subunit A1 like 2	NC_036786.1	37094231	37100852	6622	KATNAL2	katanin p60 subunit A-like 2 [Source:HGNC Symbol;Acc:25387]	katanin p60 subunit A-like 2 [Source:ZFIN;Acc:ZDB-GENE-051113-156]
gene15033	-2.41224	2.80866	-3.68687	0.000740921	0.0266802	-0.483537	LOC101482606	ubr2	ubiquitin protein ligase E3 component n-recognin 2%2C transcript variant X1	NC_036792.1	28667396	28724281	56886	UBR2	ubiquitin protein ligase E3 component n-recognin 2 [Source:HGNC Symbol;Acc:21289]	ubiquitin protein ligase E3 component n-recognin 2 [Source:ZFIN;Acc:ZDB-GENE-081107-29]
gene25785	-2.00304	5.57666	-3.70535	0.000702902	0.026228	-0.484123	LOC101465405	LOC101465405	cerebellin-1-like	NW_020192350.1	656203	661656	5454	CBLN1	cerebellin 1 precursor [Source:HGNC Symbol;Acc:1543]	Uncharacterized protein [Source:UniProtKB/TrEMBL;Acc:F1RDY1]
gene7069	-2.63099	3.99148	-3.68467	0.000745564	0.0267279	-0.4845	LOC101470539	LOC101470539	microtubule-associated tumor suppressor 1 homolog%2C transcript variant X2	NC_036785.1	38094529	38152194	57666	MTUS1	microtubule associated tumor suppressor 1 [Source:HGNC Symbol;Acc:29789]	Uncharacterized protein [Source:UniProtKB/TrEMBL;Acc:E7FD36]
gene6861	2.99617	2.6437	3.68296	0.000749205	0.0268052	-0.487802	LOC101464353	LOC101464353	multidrug resistance-associated protein 1	NC_036785.1	30823823	30850338	26516	ABCC6	ATP-binding cassette, sub-family C (CFTR/MRP), member 6 [Source:HGNC Symbol;Acc:57]	ATP-binding cassette, sub-family C (CFTR/MRP), member 6a [Source:ZFIN;Acc:ZDB-GENE-050517-18]
gene12390	-2.45527	2.82479	-3.68147	0.000752387	0.0268285	-0.497411	LOC101468482	m6pr	mannose-6-phosphate receptor%2C cation dependent	NC_036790.1	18733871	18738124	4254	M6PR	mannose-6-phosphate receptor (cation dependent) [Source:HGNC Symbol;Acc:6752]	mannose-6-phosphate receptor (cation dependent) [Source:ZFIN;Acc:ZDB-GENE-040426-2285]
gene8675	-2.42159	3.21771	-3.68082	0.000753776	0.0268285	-0.497868	LOC101472815	LOC101472815	heterogeneous nuclear ribonucleoprotein K%2C transcript variant X4	NC_036786.1	47988744	48008850	20107	HNRNPK	heterogeneous nuclear ribonucleoprotein K [Source:HGNC Symbol;Acc:5044]	heterogeneous nuclear ribonucleoprotein K, like [Source:ZFIN;Acc:ZDB-GENE-040426-1923]
gene12115	2.66315	1.80666	3.68041	0.000754651	0.0268285	-0.498015	LOC101476669	LOC101476669	furin-like	NC_036790.1	13343986	13416934	72949	PCSK2	proprotein convertase subtilisin/kexin type 2 [Source:HGNC Symbol;Acc:8744]	proprotein convertase subtilisin/kexin type 2 [Source:ZFIN;Acc:ZDB-GENE-090608-1]
gene9315	-2.58382	4.01264	-3.67919	0.00075728	0.0268285	-0.49825	LOC101487183	LOC101487183	protein Tob1%2C transcript variant X1	NC_036787.1	3154888	3158315	3428	TOB1	transducer of ERBB2, 1 [Source:HGNC Symbol;Acc:11979]	transducer of ERBB2, 1b [Source:ZFIN;Acc:ZDB-GENE-040426-2151]
gene13809	-2.38486	2.41251	-3.67848	0.000758809	0.0268301	-0.501664	LOC101469452	gldc	glycine decarboxylase	NC_036791.1	26630387	26648253	17867	GLDC	glycine dehydrogenase (decarboxylating) [Source:HGNC Symbol;Acc:4313]	glycine dehydrogenase (decarboxylating) [Source:HGNC Symbol;Acc:4313]
gene25335	-2.54269	3.65739	-3.6757	0.000764838	0.0269904	-0.508131	LOC101477089	LOC101477089	protein NLRC3	NW_020192332.1	1070339	1150608	80270	NA	NA	Uncharacterized protein [Source:UniProtKB/TrEMBL;Acc:H9GYF5]
gene7587	-2.44795	3.01778	-3.67346	0.000769722	0.0271059	-0.517509	LOC101477283	acsbg1	acyl-CoA synthetase bubblegum family member 1	NC_036786.1	13004205	13009393	5189	ACSBG1	acyl-CoA synthetase bubblegum family member 1 [Source:HGNC Symbol;Acc:29567]	acyl-CoA synthetase bubblegum family member 1 [Source:ZFIN;Acc:ZDB-GENE-110914-219]
gene21403	-1.81099	6.03688	-3.71046	0.000692731	0.0260756	-0.526548	LOC101487391	LOC101487391	caM kinase-like vesicle-associated protein%2C transcript variant X1	NC_036799.1	939156	985059	45904	CAMKV	CaM kinase-like vesicle-associated [Source:HGNC Symbol;Acc:28788]	CaM kinase-like vesicle-associated, like [Source:ZFIN;Acc:ZDB-GENE-090311-58]
gene21006	-1.8017	5.86533	-3.70048	0.000712736	0.0262488	-0.531406	LOC101477599	LOC101477599	GTP-binding protein Di-Ras1	NC_036798.1	17492659	17507829	15171	DIRAS1	DIRAS family, GTP-binding RAS-like 1 [Source:HGNC Symbol;Acc:19127]	DIRAS family, GTP-binding RAS-like 1b [Source:ZFIN;Acc:ZDB-GENE-070912-620]
gene3064	-2.58875	3.9204	-3.65946	0.000800966	0.0277294	-0.547666	LOC101487917	gigyf1	GRB10 interacting GYF protein 1%2C transcript variant X1	NC_036782.1	29912162	29934035	21874	GIGYF1	GRB10 interacting GYF protein 1 [Source:HGNC Symbol;Acc:9126]	GRB10 interacting GYF protein 1 [Source:HGNC Symbol;Acc:9126]
gene24834	-2.55055	3.75734	-3.65872	0.000802654	0.0277294	-0.549639	LOC101463833	ndfip2	Nedd4 family interacting protein 2	NC_036801.1	32094394	32111741	17348	NDFIP2	Nedd4 family interacting protein 2 [Source:HGNC Symbol;Acc:18537]	Nedd4 family interacting protein 2 [Source:ZFIN;Acc:ZDB-GENE-040426-2662]
gene18991	-1.46574	6.42497	-3.72656	0.000661609	0.0252726	-0.551749	LOC101470795	anks1b	ankyrin repeat and sterile alpha motif domain containing 1B%2C transcript variant X5	NC_036796.1	21944225	22229295	285071	ANKS1B	ankyrin repeat and sterile alpha motif domain containing 1B [Source:HGNC Symbol;Acc:24600]	ankyrin repeat and sterile alpha motif domain containing 1B [Source:ZFIN;Acc:ZDB-GENE-041210-349]
gene1377	-2.34098	2.73804	-3.65852	0.000803093	0.0277294	-0.553551	LOC101466755	efnb1	ephrin B1	NC_036781.1	17511695	17570186	58492	NA	NA	NA
gene1871	-2.29354	2.35566	-3.65564	0.00080969	0.0277731	-0.558027	LOC101480559	LOC101480559	protein eva-1 homolog C%2C transcript variant X1	NC_036781.1	29867328	29875168	7841	EVA1C	eva-1 homolog C (C. elegans) [Source:HGNC Symbol;Acc:13239]	eva-1 homolog C (C. elegans) [Source:ZFIN;Acc:ZDB-GENE-091204-329]
gene3436	-2.64989	3.3979	-3.65557	0.000809868	0.0277731	-0.563913	LOC101481514	LOC101481514	casein kinase I%2C transcript variant X1	NC_036783.1	4243159	4264850	21692	CSNK1D	casein kinase 1, delta [Source:HGNC Symbol;Acc:2452]	casein kinase 1, delta b [Source:ZFIN;Acc:ZDB-GENE-040426-2385]
gene18080	-2.5543	5.25612	-3.65894	0.000802153	0.0277294	-0.563925	LOC101472947	bin1	bridging integrator 1%2C transcript variant X1	NC_036795.1	21450621	21467014	16394	BIN1	bridging integrator 1 [Source:HGNC Symbol;Acc:1052]	bridging integrator 1 [Source:HGNC Symbol;Acc:1052]
gene11286	-2.30034	2.72741	-3.65403	0.000813408	0.0278346	-0.564635	LOC101463625	LOC101463625	methyltransferase-like protein 27%2C transcript variant X3	NC_036789.1	17556914	17560840	3927	WBSCR27	Williams Beuren syndrome chromosome region 27 [Source:HGNC Symbol;Acc:19068]	Williams Beuren syndrome chromosome region 27 [Source:ZFIN;Acc:ZDB-GENE-060421-5918]
gene13793	-2.44051	4.43722	-3.65176	0.000818659	0.0279085	-0.56703	LOC101475726	tmem8b	transmembrane protein 8B%2C transcript variant X1	NC_036791.1	25504484	25541372	36889	TMEM8B	transmembrane protein 8B [Source:HGNC Symbol;Acc:21427]	transmembrane protein 8B [Source:HGNC Symbol;Acc:21427]
gene5058	-2.41989	4.88781	-3.65262	0.000816655	0.0278929	-0.571329	LOC101470280	LOC101470280	ADP-ribosylation factor 3%2C transcript variant X2	NC_036784.1	15506886	15513820	6935	ARF3	ADP-ribosylation factor 3 [Source:HGNC Symbol;Acc:654]	ADP-ribosylation factor 3b [Source:ZFIN;Acc:ZDB-GENE-030616-356]
gene21007	-2.2558	5.54503	-3.66563	0.000787055	0.0273998	-0.572079	LOC101478343	LOC101478343	guanine nucleotide-binding protein G(I)/G(S)/G(O) subunit gamma-7%2C transcript variant X3	NC_036798.1	17510865	17519475	8611	GNG7	guanine nucleotide binding protein (G protein), gamma 7 [Source:HGNC Symbol;Acc:4410]	guanine nucleotide binding protein (G protein), gamma 7 [Source:ZFIN;Acc:ZDB-GENE-040718-93]
gene2619	-2.12227	5.70249	-3.67214	0.000772612	0.0271059	-0.573413	LOC101477345	LOC101477345	ATP-sensitive inward rectifier potassium channel 10%2C transcript variant X2	NC_036782.1	17445120	17468508	23389	KCNJ10	potassium inwardly-rectifying channel, subfamily J, member 10 [Source:HGNC Symbol;Acc:6256]	potassium inwardly-rectifying channel, subfamily J, member 10 [Source:HGNC Symbol;Acc:6256]
gene18935	-2.69106	4.13882	-3.64783	0.000827839	0.0281684	-0.576144	LOC101486294	LOC101486294	guanine nucleotide-binding protein G(i) subunit alpha-1	NC_036796.1	20821333	20836141	14809	GNAI1	guanine nucleotide binding protein (G protein), alpha inhibiting activity polypeptide 1 [Source:HGNC Symbol;Acc:4384]	guanine nucleotide binding protein (G protein), alpha inhibiting activity polypeptide 1 [Source:ZFIN;Acc:ZDB-GENE-040426-1310]
gene24738	-2.23933	5.78545	-3.66943	0.000778593	0.0271975	-0.582758	LOC101477720	LOC101477720	ATP synthase subunit beta%2C mitochondrial	NC_036801.1	28727852	28731612	3761	ATP5B	ATP synthase, H+ transporting, mitochondrial F1 complex, beta polypeptide [Source:HGNC Symbol;Acc:830]	ATP synthase, H+ transporting, mitochondrial F1 complex, beta polypeptide [Source:HGNC Symbol;Acc:830]
gene5779	-2.3621	2.381	-3.6451	0.000834281	0.0283342	-0.584689	LOC101473050	eif6	eukaryotic translation initiation factor 6	NC_036784.1	35726737	35731720	4984	EIF6	eukaryotic translation initiation factor 6 [Source:HGNC Symbol;Acc:6159]	eukaryotic translation initiation factor 6 [Source:ZFIN;Acc:ZDB-GENE-031118-110]
gene9968	-2.48436	4.1387	-3.64229	0.000840957	0.0285074	-0.589511	LOC101479164	nbr1	NBR1%2C autophagy cargo receptor%2C transcript variant X1	NC_036787.1	19553769	19567877	14109	NBR1	neighbor of BRCA1 gene 1 [Source:HGNC Symbol;Acc:6746]	neighbor of brca1 gene 1 [Source:ZFIN;Acc:ZDB-GENE-030131-9112]
gene1530	-2.56926	4.83334	-3.63986	0.000846764	0.0285435	-0.601029	LOC101465803	LOC101465803	septin-8-A%2C transcript variant X2	NC_036781.1	22301471	22316013	14543	2018-09-08	septin 8 [Source:HGNC Symbol;Acc:16511]	septin 8b [Source:ZFIN;Acc:ZDB-GENE-070424-3]
gene6582	-2.30405	2.36156	-3.63783	0.000851639	0.0285783	-0.602517	LOC101477878	trappc5	trafficking protein particle complex 5	NC_036785.1	24443695	24446712	3018	TRAPPC5	trafficking protein particle complex 5 [Source:HGNC Symbol;Acc:23067]	trafficking protein particle complex 5 [Source:ZFIN;Acc:ZDB-GENE-040718-185]
gene12309	-2.33908	2.784	-3.63726	0.000853017	0.0285783	-0.607682	LOC101466193	LOC101466193	threonine--tRNA ligase%2C cytoplasmic%2C transcript variant X1	NC_036790.1	17424732	17439304	14573	TARS2	threonyl-tRNA synthetase 2, mitochondrial (putative) [Source:HGNC Symbol;Acc:30740]	threonyl-tRNA synthetase-like 2 [Source:HGNC Symbol;Acc:24728]
gene901	-2.4768	2.48305	-3.63623	0.000855517	0.0285783	-0.608494	LOC101467683	LOC101467683	very-long-chain (3R)-3-hydroxyacyl-CoA dehydratase%2C transcript variant X2	NC_036780.1	33976445	33994088	17644	PTPLAD1	protein tyrosine phosphatase-like A domain containing 1 [Source:HGNC Symbol;Acc:24175]	protein tyrosine phosphatase-like A domain containing 1 [Source:ZFIN;Acc:ZDB-GENE-040426-1200]
gene4229	-2.47605	4.52098	-3.6352	0.000858012	0.0285783	-0.608902	LOC101481158	LOC101481158	inactive phospholipase C-like protein 2	NC_036783.1	22148614	22218578	69965	PLCL2	phospholipase C-like 2 [Source:HGNC Symbol;Acc:9064]	si:ch211-210g13.5 [Source:ZFIN;Acc:ZDB-GENE-030131-5675]
gene15047	-1.85345	5.87178	-3.67072	0.000775738	0.0271628	-0.609537	LOC101468663	hnrnpll	heterogeneous nuclear ribonucleoprotein L like	NC_036792.1	29112234	29182223	69990	HNRPLL	heterogeneous nuclear ribonucleoprotein L-like [Source:HGNC Symbol;Acc:25127]	heterogeneous nuclear ribonucleoprotein L [Source:ZFIN;Acc:ZDB-GENE-040426-710]
gene9467	3.5913	3.04029	3.63487	0.000858816	0.0285783	-0.611615	LOC101469773	LOC101469773	homeobox protein Dlx4b	NC_036787.1	7775734	7779550	3817	DLX4	distal-less homeobox 4 [Source:HGNC Symbol;Acc:2917]	distal-less homeobox gene 4b [Source:ZFIN;Acc:ZDB-GENE-990415-50]
gene10723	-2.44958	3.03111	-3.63485	0.000858868	0.0285783	-0.614714	LOC101468321	c1qbp	complement C1q binding protein	NC_036789.1	1917033	1920412	3380	C1QBP	complement component 1, q subcomponent binding protein [Source:HGNC Symbol;Acc:1243]	complement component 1, q subcomponent binding protein [Source:HGNC Symbol;Acc:1243]
gene13385	1.35048	7.33489	3.78454	0.000560362	0.0226502	-0.617076	LOC101473484	ccnh	cyclin H%2C transcript variant X1	NC_036791.1	15420216	15425850	5635	CCNH	cyclin H [Source:HGNC Symbol;Acc:1594]	cyclin H [Source:ZFIN;Acc:ZDB-GENE-050320-13]
gene1517	-2.53393	4.48626	-3.62671	0.000878894	0.0289888	-0.629547	LOC101470460	kif3a	kinesin family member 3A%2C transcript variant X1	NC_036781.1	22068922	22084343	15422	KIF3A	kinesin family member 3A [Source:HGNC Symbol;Acc:6319]	kinesin family member 3A [Source:HGNC Symbol;Acc:6319]
gene21469	-1.23996	7.75182	-3.76546	0.000591896	0.0235559	-0.629732	LOC101468314	faim2	Fas apoptotic inhibitory molecule 2	NC_036799.1	2210180	2216032	5853	FAIM2	Fas apoptotic inhibitory molecule 2 [Source:HGNC Symbol;Acc:17067]	Fas apoptotic inhibitory molecule 2 [Source:HGNC Symbol;Acc:17067]
gene4472	1.08913	7.76061	3.79465	0.000544304	0.0221997	-0.632339	LOC101474317	LOC101474317	uncharacterized LOC101474317%2C transcript variant X2	NC_036783.1	28600384	28605510	5127	NA	NA	NA
gene12035	-2.40526	5.59974	-3.63909	0.000848614	0.0285526	-0.635127	LOC101470960	sdha	succinate dehydrogenase complex flavoprotein subunit A	NC_036790.1	10531945	10543403	11459	SDHA	succinate dehydrogenase complex, subunit A, flavoprotein (Fp) [Source:HGNC Symbol;Acc:10680]	succinate dehydrogenase complex, subunit A, flavoprotein (Fp) [Source:ZFIN;Acc:ZDB-GENE-040426-874]
gene11173	-2.41207	3.00494	-3.62596	0.000880751	0.0289888	-0.636474	LOC101475643	proser1	proline and serine rich 1%2C transcript variant X1	NC_036789.1	14957007	14965479	8473	PROSER1	proline and serine rich 1 [Source:HGNC Symbol;Acc:20291]	proline and serine rich 1 [Source:HGNC Symbol;Acc:20291]
gene16691	1.22737	7.59187	3.78564	0.000558592	0.0226292	-0.640767	LOC112436015	LOC112436015	differentially expressed in FDCP 6 homolog	NC_036794.1	11623951	11664260	40310	DEF6	differentially expressed in FDCP 6 homolog (mouse) [Source:HGNC Symbol;Acc:2760]	si:dkeyp-15g12.1 [Source:ZFIN;Acc:ZDB-GENE-060503-87]
gene25193	-2.2176	6.78254	-3.69232	0.000729505	0.0264673	-0.64205	LOC101464477	atp6v1a	ATPase H+ transporting V1 subunit A	NW_020192319.1	3423427	3432977	9551	ATP6V1A	ATPase, H+ transporting, lysosomal 70kDa, V1 subunit A [Source:HGNC Symbol;Acc:851]	ATPase, H+ transporting, lysosomal V1 subunit Ab [Source:ZFIN;Acc:ZDB-GENE-030131-9529]
gene10250	-1.4843	6.87683	-3.71378	0.000686206	0.0259546	-0.643776	LOC101481426	zic1	Zic family member 1	NC_036788.1	6802430	6805843	3414	ZIC1	Zic family member 1 [Source:HGNC Symbol;Acc:12872]	zic family member 1 (odd-paired homolog, Drosophila) [Source:ZFIN;Acc:ZDB-GENE-000208-4]
gene6400	-2.46899	4.32514	-3.61779	0.000901362	0.0294846	-0.650762	LOC101476712	LOC101476712	double C2-like domain-containing protein beta	NC_036785.1	19553627	19590814	37188	DOC2B	double C2-like domains, beta [Source:HGNC Symbol;Acc:2986]	double C2-like domains, delta [Source:ZFIN;Acc:ZDB-GENE-081104-451]
gene24889	-2.45372	3.0227	-3.61619	0.000905446	0.0295299	-0.661264	LOC101478303	LOC101478303	probable ribonuclease ZC3H12C%2C transcript variant X3	NC_036801.1	37003750	37022248	18499	ZC3H12C	zinc finger CCCH-type containing 12C [Source:HGNC Symbol;Acc:29362]	zinc finger CCCH-type containing 12B [Source:ZFIN;Acc:ZDB-GENE-060526-290]
gene26285	-1.61416	6.40086	-3.67954	0.000756537	0.0268285	-0.662134	LOC101484122	LOC101484122	eukaryotic translation initiation factor 5A-1	NW_020192377.1	416417	424255	7839	EIF5A	eukaryotic translation initiation factor 5A [Source:HGNC Symbol;Acc:3300]	eukaryotic translation initiation factor 5A [Source:ZFIN;Acc:ZDB-GENE-040426-2229]
gene3052	-2.30981	2.745	-3.61487	0.000908823	0.0295335	-0.662876	LOC101466965	LOC101466965	tudor domain-containing protein 7B%2C transcript variant X1	NC_036782.1	29170010	29186910	16901	NA	NA	NA
gene13769	-1.42977	6.75416	-3.69877	0.000716219	0.0262488	-0.672244	LOC101482589	slc20a2	solute carrier family 20 member 2%2C transcript variant X4	NC_036791.1	25172202	25220026	47825	SLC20A2	solute carrier family 20 (phosphate transporter), member 2 [Source:HGNC Symbol;Acc:10947]	solute carrier family 20 (phosphate transporter), member 2 [Source:ZFIN;Acc:ZDB-GENE-060929-828]
gene257	-2.35576	5.06038	-3.61509	0.000908269	0.0295335	-0.673333	LOC101481874	LOC101481874	cAMP-regulated phosphoprotein 19	NC_036780.1	11510088	11515427	5340	ARPP19	cAMP-regulated phosphoprotein, 19kDa [Source:HGNC Symbol;Acc:16967]	cAMP-regulated phosphoprotein 19b [Source:ZFIN;Acc:ZDB-GENE-040426-930]
gene1278	-2.45409	4.49307	-3.60791	0.000926884	0.0299053	-0.67674	LOC101484824	snx25	sorting nexin 25%2C transcript variant X1	NC_036781.1	14279017	14300527	21511	SNX25	sorting nexin 25 [Source:HGNC Symbol;Acc:21883]	sorting nexin 25 [Source:ZFIN;Acc:ZDB-GENE-121105-11]
gene5092	-2.52775	4.83154	-3.60878	0.000924603	0.0299053	-0.679057	LOC101487326	LOC101487326	sodium-coupled neutral amino acid transporter 3%2C transcript variant X1	NC_036784.1	16188853	16222931	34079	SLC38A5	solute carrier family 38, member 5 [Source:HGNC Symbol;Acc:18070]	solute carrier family 38, member 5b [Source:ZFIN;Acc:ZDB-GENE-040718-395]
gene23535	-1.25881	8.094	-3.76083	0.000599804	0.0236106	-0.6842	LOC101477131	LOC101477131	stathmin%2C transcript variant X2	NC_036800.1	25757801	25761113	3313	STMN1	stathmin 1 [Source:HGNC Symbol;Acc:6510]	stathmin 1a [Source:ZFIN;Acc:ZDB-GENE-031006-14]
gene1502	-2.53699	4.03119	-3.60117	0.000944685	0.0304253	-0.691285	LOC101476181	LOC101476181	ribose-phosphate pyrophosphokinase 1%2C transcript variant X1	NC_036781.1	21571453	21575337	3885	PRPS1	phosphoribosyl pyrophosphate synthetase 1 [Source:HGNC Symbol;Acc:9462]	phosphoribosyl pyrophosphate synthetase 1B [Source:ZFIN;Acc:ZDB-GENE-030131-4011]
gene11701	2.61684	0.976737	3.59958	0.000948956	0.0304528	-0.695878	LOC101468412	LOC101468412	histone H3%2C transcript variant X2	NC_036789.1	30877495	30884786	7292	HIST2H3C	histone cluster 2, H3c [Source:HGNC Symbol;Acc:20503]	zgc:173552 [Source:ZFIN;Acc:ZDB-GENE-080220-24]
gene4202	-2.49471	3.73784	-3.59875	0.000951162	0.0304528	-0.698461	LOC101471187	LOC101471187	ADP-ribosylation factor 1	NC_036783.1	21468733	21479684	10952	ARL17B	ADP-ribosylation factor-like 17B [Source:HGNC Symbol;Acc:32387]	ADP-ribosylation factor 5 [Source:HGNC Symbol;Acc:658]
gene24697	-2.28749	2.35251	-3.5976	0.000954263	0.0304528	-0.702352	LOC101479218	chn1	chimerin 1%2C transcript variant X3	NC_036801.1	28237092	28274049	36958	CHN1	chimerin 1 [Source:HGNC Symbol;Acc:1943]	chimerin (chimaerin) 1 [Source:ZFIN;Acc:ZDB-GENE-040426-1934]
gene17100	2.6233	1.52592	3.59646	0.000957339	0.0304528	-0.703006	LOC112436074	LOC112436074		NC_036794.1	24457951	24461566	3616	NA	NA	NA
gene10662	-2.38009	2.96259	-3.59796	0.00095329	0.0304528	-0.705578	LOC101463757	btg3	BTG anti-proliferation factor 3	NC_036789.1	79368	82905	3538	BTG3	BTG family, member 3 [Source:HGNC Symbol;Acc:1132]	B-cell translocation gene 3 [Source:ZFIN;Acc:ZDB-GENE-031113-19]
gene5338	-2.58639	3.83385	-3.59565	0.000959536	0.030469	-0.706842	LOC101470797	LOC101470797	guanine nucleotide-binding protein G(i) subunit alpha-2	NC_036784.1	21207278	21256866	49589	GNAI2	guanine nucleotide binding protein (G protein), alpha inhibiting activity polypeptide 2 [Source:HGNC Symbol;Acc:4385]	guanine nucleotide binding protein (G protein), alpha inhibiting activity polypeptide 2b [Source:ZFIN;Acc:ZDB-GENE-030131-5861]
gene5284	-1.92202	5.67983	-3.62325	0.000887529	0.0291561	-0.707328	LOC101474840	LOC101474840	probable glutamate receptor	NC_036784.1	20445305	20451207	5903	GRIA4	glutamate receptor, ionotropic, AMPA 4 [Source:HGNC Symbol;Acc:4574]	Uncharacterized protein [Source:UniProtKB/TrEMBL;Acc:E7F5R2]
gene2643	-2.4745	3.33615	-3.59763	0.000954195	0.0304528	-0.708114	LOC101485341	mfap3l	microfibril associated protein 3 like%2C transcript variant X1	NC_036782.1	18021174	18029312	8139	MFAP3L	microfibrillar-associated protein 3-like [Source:HGNC Symbol;Acc:29083]	microfibrillar-associated protein 3-like [Source:HGNC Symbol;Acc:29083]
gene7604	-1.67061	6.2913	-3.65548	0.000810076	0.0277731	-0.711009	LOC101471771	islr2	immunoglobulin superfamily containing leucine rich repeat 2	NC_036786.1	13236613	13240808	4196	ISLR2	immunoglobulin superfamily containing leucine-rich repeat 2 [Source:HGNC Symbol;Acc:29286]	immunoglobulin superfamily containing leucine-rich repeat 2 [Source:ZFIN;Acc:ZDB-GENE-050320-95]
gene6544	-2.66092	4.56921	-3.59361	0.000965072	0.030587	-0.712116	LOC101482087	LOC101482087	trinucleotide repeat-containing gene 6C protein%2C transcript variant X3	NC_036785.1	23133617	23188062	54446	TNRC6C	trinucleotide repeat containing 6C [Source:HGNC Symbol;Acc:29318]	trinucleotide repeat containing 6C [Source:HGNC Symbol;Acc:29318]
gene15631	-2.45828	4.39512	-3.59304	0.000966635	0.030587	-0.712514	LOC112430060	LOC112430060	syntaxin-1A-like%2C transcript variant X2	NC_036793.1	20196086	20204456	8371	STX1A	syntaxin 1A (brain) [Source:HGNC Symbol;Acc:11433]	syntaxin 1A (brain) [Source:HGNC Symbol;Acc:11433]
gene12324	-2.3077	3.13463	-3.59219	0.000968952	0.0306067	-0.718255	LOC101486161	khdc4	KH domain containing 4%2C pre-mRNA splicing factor%2C transcript variant X1	NC_036790.1	17721557	17732744	11188	DDX46	DEAD (Asp-Glu-Ala-Asp) box polypeptide 46 [Source:HGNC Symbol;Acc:18681]	DEAD (Asp-Glu-Ala-Asp) box polypeptide 46 [Source:ZFIN;Acc:ZDB-GENE-030131-667]
gene748	-1.68069	6.10967	-3.64076	0.0008446	0.0285435	-0.722404	LOC101470471	sema6d	semaphorin 6D%2C transcript variant X2	NC_036780.1	27198045	27218772	20728	SEMA6D	sema domain, transmembrane domain (TM), and cytoplasmic domain, (semaphorin) 6D [Source:HGNC Symbol;Acc:16770]	sema domain, transmembrane domain (TM), and cytoplasmic domain, (semaphorin) 6D, like [Source:ZFIN;Acc:ZDB-GENE-050417-171]
gene10006	-2.04383	6.08671	-3.63342	0.000862348	0.0286414	-0.723369	LOC101476491	snf8	SNF8%2C ESCRT-II complex subunit	NC_036787.1	20789516	20793521	4006	SNF8	SNF8, ESCRT-II complex subunit, homolog (S. cerevisiae) [Source:HGNC Symbol;Acc:17028]	SNF8, ESCRT-II complex subunit, homolog (S. cerevisiae) [Source:ZFIN;Acc:ZDB-GENE-041114-117]
gene20808	-2.59536	4.04568	-3.58748	0.00098191	0.0309079	-0.725615	LOC101466565	LOC101466565	uncharacterized LOC101466565%2C transcript variant X2	NC_036798.1	13436054	13443732	7679	ARHGEF33	Rho guanine nucleotide exchange factor (GEF) 33 [Source:HGNC Symbol;Acc:37252]	NA
gene3655	-2.52041	3.68619	-3.58458	0.000989956	0.031107	-0.734685	LOC101471598	smurf1	SMAD specific E3 ubiquitin protein ligase 1%2C transcript variant X1	NC_036783.1	8978608	8994420	15813	SMURF1	SMAD specific E3 ubiquitin protein ligase 1 [Source:HGNC Symbol;Acc:16807]	SMAD specific E3 ubiquitin protein ligase 1 [Source:ZFIN;Acc:ZDB-GENE-040426-2744]
gene21318	-2.97993	4.84898	-3.58333	0.000993465	0.0311631	-0.739916	LOC101476662	LOC101476662	ryanodine receptor 3%2C transcript variant X1	NC_036798.1	24908114	25016297	108184	RYR3	ryanodine receptor 3 [Source:HGNC Symbol;Acc:10485]	ryanodine receptor 3 [Source:ZFIN;Acc:ZDB-GENE-041001-165]
gene11730	-2.28191	2.32277	-3.5814	0.000998884	0.0312787	-0.741969	LOC101471981	slco2b1	solute carrier organic anion transporter family member 2B1%2C transcript variant X1	NC_036789.1	31247141	31277784	30644	SLCO2B1	solute carrier organic anion transporter family, member 2B1 [Source:HGNC Symbol;Acc:10962]	solute carrier organic anion transporter family, member 2B1 [Source:ZFIN;Acc:ZDB-GENE-051023-6]
gene23418	-2.42784	4.42715	-3.57569	0.00101507	0.0315124	-0.755878	LOC101466322	LOC101466322	juxtaposed with another zinc finger protein 1%2C transcript variant X1	NC_036800.1	20743588	20768721	25134	JAZF1	JAZF zinc finger 1 [Source:HGNC Symbol;Acc:28917]	JAZF zinc finger 1a [Source:ZFIN;Acc:ZDB-GENE-060503-492]
gene5559	-2.40639	3.03684	-3.57687	0.00101169	0.0315124	-0.759639	LOC101479521	LOC101479521	uncharacterized protein C6orf106 homolog	NC_036784.1	28190214	28203405	13192	C6orf106	chromosome 6 open reading frame 106 [Source:HGNC Symbol;Acc:21215]	chromosome 6 open reading frame 106 [Source:HGNC Symbol;Acc:21215]
gene11394	-2.32777	2.78789	-3.57565	0.00101518	0.0315124	-0.761493	LOC101477363	rbm27	RNA binding motif protein 27%2C transcript variant X1	NC_036789.1	19427412	19450617	23206	RBM27	RNA binding motif protein 27 [Source:HGNC Symbol;Acc:29243]	RNA binding motif protein 27 [Source:ZFIN;Acc:ZDB-GENE-110411-31]
gene376	1.19763	7.30045	3.72803	0.000658835	0.025251	-0.763708	LOC101467627	pbld	phenazine biosynthesis like protein domain containing%2C transcript variant X1	NC_036780.1	14993182	15001124	7943	PBLD	phenazine biosynthesis-like protein domain containing [Source:HGNC Symbol;Acc:23301]	phenazine biosynthesis-like protein domain containing [Source:HGNC Symbol;Acc:23301]
gene108	-2.31361	2.76527	-3.56773	0.00103807	0.0319758	-0.780652	LOC101484085	cdh8	cadherin 8%2C transcript variant X3	NC_036780.1	4686794	4785747	98954	CDH8	cadherin 8, type 2 [Source:HGNC Symbol;Acc:1767]	Uncharacterized protein [Source:UniProtKB/TrEMBL;Acc:F1QAB8]
gene8307	-2.20656	5.29898	-3.57792	0.00100871	0.0315124	-0.781825	LOC101465014	phf24	PHD finger protein 24%2C transcript variant X2	NC_036786.1	35951506	35979216	27711	KIAA1045	KIAA1045 [Source:HGNC Symbol;Acc:29180]	si:ch211-269m17.1 [Source:ZFIN;Acc:ZDB-GENE-091204-154]
gene6197	-1.39635	6.97499	-3.66891	0.000779737	0.0271975	-0.782165	LOC101480085	cpe	carboxypeptidase E	NC_036785.1	13007136	13024537	17402	CPE	carboxypeptidase E [Source:HGNC Symbol;Acc:2303]	carboxypeptidase E [Source:ZFIN;Acc:ZDB-GENE-090313-68]
gene10950	-2.32319	2.75692	-3.56654	0.00104157	0.0320052	-0.783425	LOC101484402	LOC101484402	sodium channel subunit beta-4%2C transcript variant X2	NC_036789.1	10677867	10697125	19259	SCN4B	sodium channel, voltage-gated, type IV, beta subunit [Source:HGNC Symbol;Acc:10592]	sodium channel, voltage-gated, type IV, beta b [Source:ZFIN;Acc:ZDB-GENE-031116-71]
gene10078	2.61301	0.976737	3.55923	0.00106319	0.0322819	-0.7931	LOC101481887	LOC101481887	zinc finger protein OZF	NC_036787.1	22466363	22470331	3969	NA	NA	heterogeneous nuclear ribonucleoprotein A0, like [Source:ZFIN;Acc:ZDB-GENE-030131-618]
gene16115	2.61498	0.976737	3.55867	0.00106487	0.0322819	-0.794451	LOC101468551	LOC101468551	pannexin-1%2C transcript variant X1	NC_036793.1	32958964	32970839	11876	PANX1	pannexin 1 [Source:HGNC Symbol;Acc:8599]	pannexin 1a [Source:ZFIN;Acc:ZDB-GENE-040426-766]
gene22857	-2.55054	3.3813	-3.56139	0.00105675	0.0322819	-0.7967	LOC101484307	LOC101484307	transcription and mRNA export factor ENY2-2%2C transcript variant X2	NC_036800.1	7594176	7595770	1595	ENY2	enhancer of yellow 2 homolog (Drosophila) [Source:HGNC Symbol;Acc:24449]	enhancer of yellow 2 homolog (Drosophila) [Source:ZFIN;Acc:ZDB-GENE-040718-124]
gene17906	-2.39687	4.21449	-3.55713	0.00106947	0.0323578	-0.799912	LOC101470628	adam23	ADAM metallopeptidase domain 23%2C transcript variant X1	NC_036795.1	17049550	17071799	22250	ADAM23	ADAM metallopeptidase domain 23 [Source:HGNC Symbol;Acc:202]	ADAM metallopeptidase domain 23 [Source:HGNC Symbol;Acc:202]
gene16884	-2.31979	3.36776	-3.55664	0.00107095	0.0323578	-0.804981	LOC101479330	ccdc25	coiled-coil domain containing 25	NC_036794.1	17591839	17596994	5156	CCDC25	coiled-coil domain containing 25 [Source:HGNC Symbol;Acc:25591]	coiled-coil domain containing 25 [Source:ZFIN;Acc:ZDB-GENE-040426-1389]
gene27308	-2.62633	3.9596	-3.55511	0.00107557	0.0323889	-0.805997	LOC101468295	LOC101468295	next to BRCA1 gene 1 protein%2C transcript variant X1	NW_020192455.1	127583	148831	21249	NBR1	neighbor of BRCA1 gene 1 [Source:HGNC Symbol;Acc:6746]	neighbor of BRCA1 gene 1 [Source:HGNC Symbol;Acc:6746]
gene4692	-1.50843	6.41197	-3.62803	0.000875606	0.0289752	-0.809679	LOC101479109	LOC101479109	band 4.1-like protein 1%2C transcript variant X1	NC_036784.1	5488563	5589138	100576	EPB41L1	erythrocyte membrane protein band 4.1-like 1 [Source:HGNC Symbol;Acc:3378]	erythrocyte membrane protein band 4.1-like 1 [Source:HGNC Symbol;Acc:3378]
gene19062	-2.45739	4.19697	-3.55313	0.00108158	0.0324859	-0.809736	LOC101470695	cpsf6	cleavage and polyadenylation specific factor 6%2C transcript variant X1	NC_036796.1	25330583	25344952	14370	CPSF6	cleavage and polyadenylation specific factor 6, 68kDa [Source:HGNC Symbol;Acc:13871]	cleavage and polyadenylation specific factor 6 [Source:ZFIN;Acc:ZDB-GENE-030131-5277]
gene19497	-2.25853	2.33186	-3.55286	0.00108238	0.0324859	-0.812558	LOC101466194	LOC101466194	integrin beta-1%2C transcript variant X1	NC_036797.1	4311112	4340423	29312	ITGB1	integrin, beta 1 (fibronectin receptor, beta polypeptide, antigen CD29 includes MDF2, MSK12) [Source:HGNC Symbol;Acc:6153]	integrin, beta 1b [Source:ZFIN;Acc:ZDB-GENE-030909-10]
gene22119	-2.42395	3.73655	-3.55181	0.00108558	0.0325278	-0.814304	LOC101482985	LOC101482985	rho-related GTP-binding protein Rho6	NC_036799.1	19263946	19275433	11488	RND1	Rho family GTPase 1 [Source:HGNC Symbol;Acc:18314]	Rho family GTPase 1 [Source:ZFIN;Acc:ZDB-GENE-040630-6]
gene16825	2.15279	3.65464	3.55577	0.00107359	0.0323833	-0.818001	LOC101484497	gpr176	G protein-coupled receptor 176	NC_036794.1	15871516	15885274	13759	GPR176	G protein-coupled receptor 176 [Source:HGNC Symbol;Acc:32370]	G protein-coupled receptor 176 [Source:ZFIN;Acc:ZDB-GENE-041001-183]
gene23002	-2.35605	5.85934	-3.57624	0.00101349	0.0315124	-0.824302	LOC101483178	LOC101483178	adhesion G protein-coupled receptor B1%2C transcript variant X1	NC_036800.1	11887059	11909937	22879	BAI1	brain-specific angiogenesis inhibitor 1 [Source:HGNC Symbol;Acc:943]	brain-specific angiogenesis inhibitor 1 [Source:HGNC Symbol;Acc:943]
gene19667	-2.6262	4.03076	-3.54695	0.0011005	0.0327576	-0.82531	LOC101475667	ap1m1	adaptor related protein complex 1 mu 1 subunit	NC_036797.1	9122191	9138881	16691	AP1M1	adaptor-related protein complex 1, mu 1 subunit [Source:HGNC Symbol;Acc:13667]	Uncharacterized protein [Source:UniProtKB/TrEMBL;Acc:H9GXB2]
gene14050	1.03231	8.73186	3.76356	0.000595119	0.0236106	-0.827214	LOC101485427	sdccag3	serologically defined colon cancer antigen 3	NC_036791.1	32969515	32973846	4332	SDCCAG3	serologically defined colon cancer antigen 3 [Source:HGNC Symbol;Acc:10667]	NA
gene8482	-2.07311	5.31664	-3.56221	0.00105432	0.0322819	-0.828865	LOC101479923	LOC101479923	calcium-binding protein P	NC_036786.1	42193405	42198392	4988	NA	NA	prion protein b [Source:ZFIN;Acc:ZDB-GENE-041221-2]
gene8678	-2.31844	2.99306	-3.54564	0.00110458	0.0328248	-0.836245	LOC101474106	LOC101474106	protein prune homolog 2%2C transcript variant X1	NC_036786.1	48037723	48050448	12726	PRUNE2	prune homolog 2 (Drosophila) [Source:HGNC Symbol;Acc:25209]	prune homolog (Drosophila) [Source:ZFIN;Acc:ZDB-GENE-100609-1]
gene12296	-1.73946	6.13317	-3.59681	0.000956397	0.0304528	-0.836751	LOC101472690	rusc1	RUN and SH3 domain containing 1	NC_036790.1	17225954	17239533	13580	RUSC1	RUN and SH3 domain containing 1 [Source:HGNC Symbol;Acc:17153]	RUN and SH3 domain containing 2 [Source:ZFIN;Acc:ZDB-GENE-060526-131]
gene5574	-1.73554	5.966	-3.58852	0.000979014	0.0308706	-0.838317	LOC101487148	LOC101487148	cysteine and glycine-rich protein 1	NC_036784.1	28760723	28765280	4558	CSRP1	cysteine and glycine-rich protein 1 [Source:HGNC Symbol;Acc:2469]	cysteine and glycine-rich protein 1b [Source:ZFIN;Acc:ZDB-GENE-070112-252]
gene16413	-1.87928	5.65736	-3.57043	0.0010302	0.0318183	-0.842764	LOC101483827	LOC101483827	transcriptional repressor protein YY1%2C transcript variant X1	NC_036794.1	4191825	4197077	5253	YY1	YY1 transcription factor [Source:HGNC Symbol;Acc:12856]	YY1 transcription factor b [Source:ZFIN;Acc:ZDB-GENE-040426-2127]
gene19161	-2.41295	3.23406	-3.5425	0.00111434	0.0330063	-0.843277	LOC101467117	LOC101467117	cyclin-dependent kinase inhibitor 1%2C transcript variant X2	NC_036796.1	29479388	29484894	5507	CDKN1A	cyclin-dependent kinase inhibitor 1A (p21, Cip1) [Source:HGNC Symbol;Acc:1784]	Uncharacterized protein [Source:UniProtKB/TrEMBL;Acc:H9GYW2]
gene354	-2.32037	2.92135	-3.54038	0.001121	0.0331493	-0.847642	LOC101473364	LOC101473364	N-lysine methyltransferase SMYD2-A%2C transcript variant X2	NC_036780.1	14609588	14621836	12249	SMYD2	SET and MYND domain containing 2 [Source:HGNC Symbol;Acc:20982]	SET and MYND domain containing 2a [Source:ZFIN;Acc:ZDB-GENE-050320-126]
gene12365	-2.25198	5.34669	-3.55084	0.00108855	0.0325628	-0.85314	LOC101482804	u2af2	U2 small nuclear RNA auxiliary factor 2%2C transcript variant X1	NC_036790.1	18438090	18446998	8909	U2AF2	U2 small nuclear RNA auxiliary factor 2 [Source:HGNC Symbol;Acc:23156]	U2 small nuclear RNA auxiliary factor 2a [Source:ZFIN;Acc:ZDB-GENE-050706-131]
gene25181	-2.06838	5.63875	-3.5591	0.00106357	0.0322819	-0.85919	LOC101483641	rpl21	ribosomal protein L21	NW_020192319.1	3231694	3234033	2340	RPL21	ribosomal protein L21 [Source:HGNC Symbol;Acc:10313]	ribosomal protein L21 [Source:ZFIN;Acc:ZDB-GENE-030131-8512]
gene17461	-2.35825	3.78725	-3.53307	0.0011442	0.0336154	-0.859292	LOC101486002	pla1a	phospholipase A1 member A%2C transcript variant X1	NC_036795.1	4538182	4555535	17354	PLA1A	phospholipase A1 member A [Source:HGNC Symbol;Acc:17661]	zgc:91985 [Source:ZFIN;Acc:ZDB-GENE-040801-242]
gene15944	-2.21538	4.65598	-3.53432	0.00114021	0.0335527	-0.863242	LOC101465110	LOC101465110	high mobility group protein B1%2C transcript variant X1	NC_036793.1	28165163	28168963	3801	HMGB1	high mobility group box 1 [Source:HGNC Symbol;Acc:4983]	high-mobility group box 1b [Source:ZFIN;Acc:ZDB-GENE-030131-8480]
gene22803	-1.5112	7.09605	-3.64042	0.000845414	0.0285435	-0.867702	LOC101487824	LOC101487824	sodium/potassium-transporting ATPase subunit alpha-3%2C transcript variant X1	NC_036800.1	6327129	6353033	25905	ATP1A3	ATPase, Na+/K+ transporting, alpha 3 polypeptide [Source:HGNC Symbol;Acc:801]	ATPase, Na+/K+ transporting, alpha 3a polypeptide [Source:ZFIN;Acc:ZDB-GENE-001212-7]
gene10215	-2.29005	2.73969	-3.52913	0.00115693	0.0337366	-0.875613	LOC101477057	LOC101477057	integrin beta-1%2C transcript variant X1	NC_036788.1	5239053	5264086	25034	ITGB1	integrin, beta 1 (fibronectin receptor, beta polypeptide, antigen CD29 includes MDF2, MSK12) [Source:HGNC Symbol;Acc:6153]	integrin, beta 1a [Source:ZFIN;Acc:ZDB-GENE-060803-2]
gene4541	1.13827	7.00703	3.67247	0.000771902	0.0271059	-0.877695	LOC101487954	LOC101487954	perforin-1-like	NC_036783.1	30050454	30065544	15091	PRF1	perforin 1 (pore forming protein) [Source:HGNC Symbol;Acc:9360]	perforin 1.3 [Source:ZFIN;Acc:ZDB-GENE-060503-461]
gene15440	-2.53791	3.7489	-3.52601	0.00116707	0.033847	-0.877817	LOC101470184	clmp	CXADR like membrane protein%2C transcript variant X1	NC_036793.1	13404199	13487343	83145	CLMP	CXADR-like membrane protein [Source:HGNC Symbol;Acc:24039]	CXADR-like membrane protein [Source:HGNC Symbol;Acc:24039]
gene5400	-2.21535	2.30606	-3.52441	0.00117233	0.0339	-0.882029	LOC101474102	flnb	filamin B%2C transcript variant X1	NC_036784.1	22638861	22702632	63772	FLNB	filamin B, beta [Source:HGNC Symbol;Acc:3755]	filamin A, alpha (actin binding protein 280) [Source:ZFIN;Acc:ZDB-GENE-030131-2145]
gene10677	-2.28589	2.33971	-3.52404	0.00117355	0.0339	-0.883634	LOC101483711	LOC101483711	52 kDa repressor of the inhibitor of the protein kinase	NC_036789.1	465129	471280	6152	PRKRIR	protein-kinase, interferon-inducible double stranded RNA dependent inhibitor, repressor of (P58 repressor) [Source:HGNC Symbol;Acc:9440]	protein-kinase, interferon-inducible double stranded RNA dependent inhibitor, repressor of (P58 repressor) a [Source:ZFIN;Acc:ZDB-GENE-040426-2045]
gene19470	-2.29744	5.14469	-3.53172	0.00114855	0.0336883	-0.885015	LOC101484184	LOC101484184	ATP-dependent 6-phosphofructokinase%2C platelet type%2C transcript variant X2	NC_036797.1	3355195	3393878	38684	PFKP	phosphofructokinase, platelet [Source:HGNC Symbol;Acc:8878]	phosphofructokinase, platelet b [Source:ZFIN;Acc:ZDB-GENE-070912-634]
gene23297	-2.25347	5.04299	-3.53021	0.00115342	0.0337366	-0.885336	LOC101480652	LOC101480652	engulfment and cell motility protein 1%2C transcript variant X1	NC_036800.1	17943675	18048889	105215	ELMO1	engulfment and cell motility 1 [Source:HGNC Symbol;Acc:16286]	engulfment and cell motility 1 (ced-12 homolog, C. elegans) [Source:ZFIN;Acc:ZDB-GENE-040426-2069]
gene484	-2.63087	2.51923	-3.52352	0.00117525	0.0339	-0.889109	LOC101467043	aldh1a2	aldehyde dehydrogenase 1 family member A2	NC_036780.1	18147174	18176177	29004	ALDH1A2	aldehyde dehydrogenase 1 family, member A2 [Source:HGNC Symbol;Acc:15472]	aldehyde dehydrogenase 1 family, member A2 [Source:ZFIN;Acc:ZDB-GENE-011010-3]
gene5667	-2.48893	3.82118	-3.52096	0.0011837	0.0339477	-0.890099	LOC101467861	LOC101467861	guanine nucleotide-binding protein G(s) subunit alpha	NC_036784.1	31554567	31592401	37835	GNAS	GNAS complex locus [Source:HGNC Symbol;Acc:4392]	GNAS complex locus [Source:ZFIN;Acc:ZDB-GENE-090417-2]
gene16762	-2.29258	2.93147	-3.52247	0.00117871	0.0339124	-0.892103	LOC101480288	ezr	ezrin	NC_036794.1	13295135	13326258	31124	EZR	ezrin [Source:HGNC Symbol;Acc:12691]	ezrin b [Source:ZFIN;Acc:ZDB-GENE-050803-1]
gene17436	-2.31988	4.8694	-3.52317	0.00117641	0.0339	-0.895171	LOC101483157	lonrf2	LON peptidase N-terminal domain and ring finger 2	NC_036795.1	3535624	3550442	14819	LONRF2	LON peptidase N-terminal domain and ring finger 2 [Source:HGNC Symbol;Acc:24788]	CantFind
gene23191	-2.40523	3.57727	-3.51848	0.00119196	0.0341305	-0.896433	LOC101486394	LOC101486394	Y+L amino acid transporter 2	NC_036800.1	16056992	16077251	20260	SLC7A7	solute carrier family 7 (amino acid transporter light chain, y+L system), member 7 [Source:HGNC Symbol;Acc:11065]	si:dkeyp-120h9.1 [Source:ZFIN;Acc:ZDB-GENE-070705-534]
gene14194	-1.38186	6.8185	-3.61737	0.000902422	0.0294846	-0.897557	LOC101469089	rps27a	ribosomal protein S27a	NC_036792.1	2338550	2341692	3143	RPS27A	ribosomal protein S27a [Source:HGNC Symbol;Acc:10417]	ribosomal protein S27a [Source:ZFIN;Acc:ZDB-GENE-030131-10018]
gene6338	-2.51155	3.84182	-3.51698	0.00119696	0.0342191	-0.899161	LOC101481439	LOC101481439	inactive ubiquitin carboxyl-terminal hydrolase 53%2C transcript variant X1	NC_036785.1	17576612	17602607	25996	USP53	ubiquitin specific peptidase 53 [Source:HGNC Symbol;Acc:29255]	ubiquitin specific peptidase 53b [Source:ZFIN;Acc:ZDB-GENE-090312-168]
gene21140	-2.49146	3.4906	-3.51554	0.0012018	0.0342191	-0.908215	LOC101474249	LOC101474249	DNA-binding protein inhibitor ID-3-A	NC_036798.1	20952042	20954049	2008	ID3	inhibitor of DNA binding 3, dominant negative helix-loop-helix protein [Source:HGNC Symbol;Acc:5362]	inhibitor of DNA binding 3 [Source:ZFIN;Acc:ZDB-GENE-020515-1]
gene10981	-1.92649	5.64933	-3.54299	0.00111281	0.0330063	-0.909096	LOC101485015	LOC101485015	neuronal tyrosine-phosphorylated phosphoinositide-3-kinase adapter 1%2C transcript variant X1	NC_036789.1	11207909	11235607	27699	MYO16	myosin XVI [Source:HGNC Symbol;Acc:29822]	myosin XVI [Source:ZFIN;Acc:ZDB-GENE-070912-470]
gene19961	-1.89393	6.07954	-3.55897	0.00106396	0.0322819	-0.916603	LOC101482480	LOC101482480	protein unc-13 homolog A%2C transcript variant X1	NC_036797.1	16626010	16659176	33167	UNC13A	unc-13 homolog A (C. elegans) [Source:HGNC Symbol;Acc:23150]	Uncharacterized protein [Source:UniProtKB/TrEMBL;Acc:H9GYD8]
gene5098	-2.33158	2.94985	-3.51037	0.00121933	0.0345853	-0.922389	LOC101485602	tex264	testis expressed 264	NC_036784.1	16285385	16362766	77382	TEX264	testis expressed 264 [Source:HGNC Symbol;Acc:30247]	testis expressed 264 [Source:HGNC Symbol;Acc:30247]
gene11071	-2.26143	2.92541	-3.5096	0.00122193	0.0346004	-0.923674	LOC101469595	LOC101469595	zinc finger Y-chromosomal protein 1%2C transcript variant X1	NC_036789.1	12927128	12936960	9833	ZFX	zinc finger protein, X-linked [Source:HGNC Symbol;Acc:12869]	Uncharacterized protein [Source:UniProtKB/TrEMBL;Acc:H9GXV4]
gene10411	1.24705	7.72387	3.686	0.000742758	0.0266802	-0.926822	LOC101477176	LOC101477176	mediator of RNA polymerase II transcription subunit 1%2C transcript variant X1	NC_036788.1	11654248	11661610	7363	MED1	mediator complex subunit 1 [Source:HGNC Symbol;Acc:9234]	zgc:111976 [Source:ZFIN;Acc:ZDB-GENE-050522-332]
gene24099	-2.35064	4.08202	-3.50507	0.00123752	0.0349367	-0.926912	LOC101465569	fryl	FRY like transcription coactivator	NC_036801.1	8054177	8142622	88446	FRYL	FRY-like [Source:HGNC Symbol;Acc:29127]	furry homolog-like (Drosophila) [Source:ZFIN;Acc:ZDB-GENE-040914-58]
gene1827	-2.55114	4.82166	-3.50909	0.00122369	0.0346004	-0.927304	LOC101482981	LOC101482981	ras-related protein Rab-6A%2C transcript variant X4	NC_036781.1	28588550	28596888	8339	RAB6A	RAB6A, member RAS oncogene family [Source:HGNC Symbol;Acc:9786]	zgc:63637 [Source:ZFIN;Acc:ZDB-GENE-040426-2686]
gene23703	-1.97536	5.48511	-3.52841	0.00115926	0.0337366	-0.928928	LOC101484917	LOC101484917	hippocalcin-like protein 1%2C transcript variant X1	NC_036800.1	33059432	33112844	53413	HPCAL1	hippocalcin-like 1 [Source:HGNC Symbol;Acc:5145]	hippocalcin [Source:ZFIN;Acc:ZDB-GENE-040426-1683]
gene6844	-2.41352	3.75923	-3.50346	0.0012431	0.034985	-0.931505	LOC101469681	mettl26	methyltransferase like 26	NC_036785.1	30207057	30211986	4930	C16orf13	chromosome 16 open reading frame 13 [Source:HGNC Symbol;Acc:14141]	chromosome 16 open reading frame 13 [Source:HGNC Symbol;Acc:14141]
gene16916	-2.24189	2.88057	-3.50391	0.00124153	0.034985	-0.936607	LOC101465141	dnajc5g	DnaJ heat shock protein family (Hsp40) member C5 gamma%2C transcript variant X1	NC_036794.1	19229333	19253011	23679	DNAJC5G	DnaJ (Hsp40) homolog, subfamily C, member 5 gamma [Source:HGNC Symbol;Acc:24844]	DnaJ (Hsp40) homolog, subfamily C, member 5 gamma a [Source:ZFIN;Acc:ZDB-GENE-030131-1583]
gene14159	-2.41356	4.19437	-3.50112	0.00125126	0.0351289	-0.936973	LOC101471551	LOC101471551	heat shock 70 kDa protein 12A%2C transcript variant X1	NC_036792.1	1286099	1327763	41665	HSPA12A	heat shock 70kDa protein 12A [Source:HGNC Symbol;Acc:19022]	heat shock protein 12A [Source:ZFIN;Acc:ZDB-GENE-031001-1]
gene10414	-2.71441	4.14657	-3.50088	0.00125211	0.0351289	-0.938373	LOC101475847	ralyl	RALY RNA binding protein like%2C transcript variant X1	NC_036788.1	11920303	12041524	121222	RALYL	RALY RNA binding protein-like [Source:HGNC Symbol;Acc:27036]	Uncharacterized protein [Source:UniProtKB/TrEMBL;Acc:E7EXG4]
gene9551	-1.97136	5.40462	-3.52112	0.00118319	0.0339477	-0.93979	LOC101482399	LOC101482399	leucine-rich repeat-containing protein 4B	NC_036787.1	9257953	9268397	10445	LRRC4B	leucine rich repeat containing 4B [Source:HGNC Symbol;Acc:25042]	leucine rich repeat containing 4Bb [Source:ZFIN;Acc:ZDB-GENE-091116-44]
gene23400	-2.45615	3.39624	-3.50021	0.00125443	0.0351396	-0.944389	LOC101471647	LOC101471647	acetylcholinesterase collagenic tail peptide	NC_036800.1	20423581	20431186	7606	COLQ	collagen-like tail subunit (single strand of homotrimer) of asymmetric acetylcholinesterase [Source:HGNC Symbol;Acc:2226]	collagen-like tail subunit (single strand of homotrimer) of asymmetric acetylcholinesterase [Source:ZFIN;Acc:ZDB-GENE-110411-119]
gene24928	-2.29577	3.11948	-3.49924	0.00125784	0.0351566	-0.947645	LOC101487356	ptgfrn	prostaglandin F2 receptor inhibitor%2C transcript variant X1	NC_036801.1	38142303	38218252	75950	PTGFRN	prostaglandin F2 receptor inhibitor [Source:HGNC Symbol;Acc:9601]	prostaglandin F2 receptor inhibitor [Source:HGNC Symbol;Acc:9601]
gene19980	-2.08557	5.35279	-3.51529	0.00120263	0.0342191	-0.947757	LOC101475014	LOC101475014	phospholipid hydroperoxide glutathione peroxidase	NC_036797.1	16986257	16989989	3733	GPX4	glutathione peroxidase 4 [Source:HGNC Symbol;Acc:4556]	glutathione peroxidase 4b [Source:ZFIN;Acc:ZDB-GENE-030410-3]
gene17434	-2.54581	4.39041	-3.4939	0.00127676	0.035298	-0.955922	LOC101482874	pdcl3	phosducin like 3	NC_036795.1	3473603	3478907	5305	PDCL3	phosducin-like 3 [Source:HGNC Symbol;Acc:28860]	phosducin-like 3 [Source:HGNC Symbol;Acc:28860]
gene5837	1.92888	5.16365	3.55931	0.00106294	0.0322819	-0.956239	LOC101471241	LOC101471241	cytochrome P450 3A40%2C transcript variant X3	NC_036785.1	1148048	1168554	20507	CYP3A5	cytochrome P450, family 3, subfamily A, polypeptide 5 [Source:HGNC Symbol;Acc:2638]	cytochrome P450, family 3, subfamily A, polypeptide 65 [Source:ZFIN;Acc:ZDB-GENE-050604-1]
gene24004	-1.7757	5.87985	-3.53658	0.00113302	0.0333953	-0.96072	LOC101476741	LOC101476741	importin-13%2C transcript variant X1	NC_036801.1	5930125	5959586	29462	IPO13	importin 13 [Source:HGNC Symbol;Acc:16853]	importin 13 [Source:ZFIN;Acc:ZDB-GENE-070706-1]
gene18876	-2.3612	2.9596	-3.49364	0.00127767	0.035298	-0.963803	LOC101479714	dgki	diacylglycerol kinase iota%2C transcript variant X1	NC_036796.1	17752846	17853568	100723	DGKI	diacylglycerol kinase, iota [Source:HGNC Symbol;Acc:2855]	Uncharacterized protein [Source:UniProtKB/TrEMBL;Acc:E7F577]
gene19494	-2.21618	3.13003	-3.4919	0.00128391	0.0354162	-0.965899	LOC101463582	LOC101463582	partitioning defective 3 homolog%2C transcript variant X1	NC_036797.1	3845301	4091835	246535	PARD3	par-3 partitioning defective 3 homolog (C. elegans) [Source:HGNC Symbol;Acc:16051]	par-3 partitioning defective 3 homolog (C. elegans) [Source:ZFIN;Acc:ZDB-GENE-030925-47]
gene23634	-2.49587	5.16667	-3.49623	0.00126847	0.0352596	-0.973479	LOC101481086	phf14	PHD finger protein 14%2C transcript variant X2	NC_036800.1	30178843	30319268	140426	PHF14	PHD finger protein 14 [Source:HGNC Symbol;Acc:22203]	PHD finger protein 14 [Source:ZFIN;Acc:ZDB-GENE-030131-1796]
gene8244	1.62372	5.08292	3.54725	0.00109959	0.0327576	-0.974554	LOC101484352	mamdc2	MAM domain containing 2%2C transcript variant X1	NC_036786.1	32554284	32597930	43647	MAMDC2	MAM domain containing 2 [Source:HGNC Symbol;Acc:23673]	MAM domain containing 2b [Source:ZFIN;Acc:ZDB-GENE-091117-16]
gene9687	-2.36087	3.13918	-3.48804	0.00129781	0.0355824	-0.975566	LOC101479202	LOC101479202	protein FRA10AC1	NC_036787.1	11894260	11914724	20465	FRA10AC1	fragile site, folic acid type, rare, fra(10)(q23.3) or fra(10)(q24.2) candidate 1 [Source:HGNC Symbol;Acc:1162]	fragile site, folic acid type, rare, candidate 1 [Source:ZFIN;Acc:ZDB-GENE-041010-95]
gene20695	-2.37051	3.38342	-3.48361	0.00131392	0.0359153	-0.98487	LOC101482373	bsdc1	BSD domain containing 1	NC_036798.1	9480722	9492668	11947	BSDC1	BSD domain containing 1 [Source:HGNC Symbol;Acc:25501]	BSD domain containing 1 [Source:ZFIN;Acc:ZDB-GENE-040905-1]
gene8642	-2.403	4.34382	-3.48011	0.00132682	0.0361038	-0.989489	LOC101482514	LOC101482514	potassium/sodium hyperpolarization-activated cyclic nucleotide-gated channel 1	NC_036786.1	47075856	47147801	71946	NA	NA	NA
gene1483	-2.26345	3.28593	-3.47929	0.00132987	0.0361324	-0.993769	LOC101483616	nlgn3	neuroligin 3%2C transcript variant X1	NC_036781.1	21189244	21328086	138843	NLGN3	neuroligin 3 [Source:HGNC Symbol;Acc:14289]	neuroligin 3a [Source:ZFIN;Acc:ZDB-GENE-071219-1]
gene20066	-2.25333	2.30602	-3.47824	0.00133374	0.0361346	-0.994984	LOC101465347	lrrc8d	leucine rich repeat containing 8 VRAC subunit D	NC_036797.1	18866902	18875145	8244	LRRC8D	leucine rich repeat containing 8 family, member D [Source:HGNC Symbol;Acc:16992]	leucine rich repeat containing 8 family, member Da [Source:ZFIN;Acc:ZDB-GENE-061009-26]
gene8596	-2.2918	3.47474	-3.47721	0.00133758	0.0361346	-0.996684	LOC101484966	ak1	adenylate kinase 1%2C transcript variant X2	NC_036786.1	45660088	45665869	5782	AK1	adenylate kinase 1 [Source:HGNC Symbol;Acc:361]	adenylate kinase 1 [Source:ZFIN;Acc:ZDB-GENE-040822-37]
gene19059	-2.22945	2.31826	-3.4776	0.00133614	0.0361346	-0.996839	LOC101472220	LOC101472220	mRNA-decapping enzyme 1B%2C transcript variant X1	NC_036796.1	25208393	25219907	11515	DCP1B	DCP1 decapping enzyme homolog B (S. cerevisiae) [Source:HGNC Symbol;Acc:24451]	DCP1 decapping enzyme homolog B (S. cerevisiae) [Source:ZFIN;Acc:ZDB-GENE-040819-1]
gene9452	-2.38272	3.77139	-3.47637	0.00134073	0.0361346	-0.99713	LOC101487400	slc38a10	solute carrier family 38 member 10%2C transcript variant X1	NC_036787.1	7535900	7555681	19782	SLC38A10	solute carrier family 38, member 10 [Source:HGNC Symbol;Acc:28237]	solute carrier family 38, member 10 [Source:ZFIN;Acc:ZDB-GENE-050309-21]
gene4400	-2.092	5.20599	-3.4896	0.00129217	0.0355824	-1.00208	LOC101481278	LOC101481278	growth arrest-specific protein 7	NC_036783.1	26378044	26433263	55220	GAS7	growth arrest-specific 7 [Source:HGNC Symbol;Acc:4169]	FCH domain only 2 [Source:HGNC Symbol;Acc:25180]
gene2575	-2.52553	3.52563	-3.47653	0.00134013	0.0361346	-1.00465	LOC101467573	arhgef11	Rho guanine nucleotide exchange factor 11%2C transcript variant X1	NC_036782.1	16280361	16305123	24763	ARHGEF11	Rho guanine nucleotide exchange factor (GEF) 11 [Source:HGNC Symbol;Acc:14580]	Rho guanine nucleotide exchange factor (GEF) 11 [Source:ZFIN;Acc:ZDB-GENE-070604-1]
gene19850	-2.43848	4.65875	-3.47604	0.00134195	0.0361346	-1.00481	LOC101464940	LOC101464940	dipeptidyl aminopeptidase-like protein 6%2C transcript variant X1	NC_036797.1	13924607	14006755	82149	DPP6	dipeptidyl-peptidase 6 [Source:HGNC Symbol;Acc:3010]	dipeptidyl-peptidase 6b [Source:ZFIN;Acc:ZDB-GENE-070705-88]
gene28552	1.19932	7.16429	3.63246	0.000864697	0.0286667	-1.00547	LOC101483273	cinp	cyclin dependent kinase 2 interacting protein%2C transcript variant X3	NW_020192595.1	59343	64935	5593	CINP	cyclin-dependent kinase 2 interacting protein [Source:HGNC Symbol;Acc:23789]	cyclin-dependent kinase 2 interacting protein [Source:HGNC Symbol;Acc:23789]
gene2958	-2.36125	4.41362	-3.4733	0.00135225	0.0361961	-1.00708	LOC101474977	col25a1	collagen type XXV alpha 1 chain%2C transcript variant X1	NC_036782.1	26835013	26992993	157981	COL4A5	collagen, type IV, alpha 5 [Source:HGNC Symbol;Acc:2207]	collagen, type IV, alpha 6 [Source:ZFIN;Acc:ZDB-GENE-101001-2]
gene10434	-2.68662	4.88482	-3.47543	0.00134424	0.0361424	-1.00918	LOC101468299	LOC101468299	annexin A13	NC_036788.1	12533530	12543210	9681	ANXA13	annexin A13 [Source:HGNC Symbol;Acc:536]	annexin A13 [Source:ZFIN;Acc:ZDB-GENE-010406-1]
gene15623	-2.33615	3.35728	-3.47336	0.00135201	0.0361961	-1.0095	LOC101471437	rab4b	RAB4B%2C member RAS oncogene family	NC_036793.1	19938064	19948189	10126	RAB4B	RAB4B, member RAS oncogene family [Source:HGNC Symbol;Acc:9782]	RAB4B, member RAS oncogene family [Source:ZFIN;Acc:ZDB-GENE-040822-15]
gene3660	-2.39821	5.32932	-3.4841	0.00131216	0.0359153	-1.0113	LOC101469956	slc29a4	solute carrier family 29 member 4%2C transcript variant X1	NC_036783.1	9138091	9161106	23016	SLC29A4	solute carrier family 29 (nucleoside transporters), member 4 [Source:HGNC Symbol;Acc:23097]	solute carrier family 29 (nucleoside transporters), member 4 [Source:ZFIN;Acc:ZDB-GENE-070112-1932]
gene26173	-2.43099	4.50598	-3.47199	0.00135719	0.0362747	-1.01151	LOC101465899	LOC101465899	SLIT-ROBO Rho GTPase-activating protein 3%2C transcript variant X1	NW_020192371.1	301995	333555	31561	ARHGAP4	Rho GTPase activating protein 4 [Source:HGNC Symbol;Acc:674]	Rho GTPase activating protein 4b [Source:ZFIN;Acc:ZDB-GENE-090311-38]
gene6209	-2.40799	5.12897	-3.48047	0.00132549	0.0361038	-1.01242	LOC101483181	LOC101483181	LIM and calponin homology domains-containing protein 1%2C transcript variant X1	NC_036785.1	13165735	13196729	30995	LMO7	LIM domain 7 [Source:HGNC Symbol;Acc:6646]	LIM domain only 7a [Source:ZFIN;Acc:ZDB-GENE-030219-74]
gene17332	-2.17857	2.27711	-3.46989	0.00136515	0.0363798	-1.01469	LOC101487779	lg15h19orf24	linkage group 15 C19orf24 homolog	NC_036794.1	33124200	33126988	2789	C19orf24	chromosome 19 open reading frame 24 [Source:HGNC Symbol;Acc:26073]	NA
gene653	-2.40365	3.55469	-3.46997	0.00136486	0.0363798	-1.01543	LOC101464462	pcdh9	protocadherin 9%2C transcript variant X1	NC_036780.1	25079222	25282263	203042	PCDH9	protocadherin 9 [Source:HGNC Symbol;Acc:8661]	protocadherin 9 [Source:HGNC Symbol;Acc:8661]
gene8409	-2.22937	4.97769	-3.47488	0.00134631	0.0361443	-1.02041	LOC101479173	atp2a2	ATPase sarcoplasmic/endoplasmic reticulum Ca2+ transporting 2%2C transcript variant X2	NC_036786.1	39905618	39929027	23410	ATP2A2	ATPase, Ca++ transporting, cardiac muscle, slow twitch 2 [Source:HGNC Symbol;Acc:812]	ATPase, Ca++ transporting, cardiac muscle, slow twitch 2b [Source:ZFIN;Acc:ZDB-GENE-030131-867]
gene2998	-2.31	2.3414	-3.46152	0.00139731	0.0370729	-1.03659	LOC101484341	LOC101484341	breast cancer metastasis-suppressor 1 homolog	NC_036782.1	27939115	27945144	6030	BRMS1	breast cancer metastasis suppressor 1 [Source:HGNC Symbol;Acc:17262]	breast cancer metastasis-suppressor 1 [Source:ZFIN;Acc:ZDB-GENE-030616-596]
gene18271	2.58385	2.82874	3.45525	0.00142191	0.0374679	-1.04341	LOC101487479	hibch	3-hydroxyisobutyryl-CoA hydrolase	NC_036795.1	28606925	28628670	21746	HIBCH	3-hydroxyisobutyryl-CoA hydrolase [Source:HGNC Symbol;Acc:4908]	3-hydroxyisobutyryl-Coenzyme A hydrolase [Source:ZFIN;Acc:ZDB-GENE-050327-29]
gene21210	-1.19002	7.88719	-3.61913	0.000897956	0.0294451	-1.04379	LOC101473746	LOC101473746	14-3-3 protein zeta%2C transcript variant X1	NC_036798.1	23008918	23017107	8190	SFN	stratifin [Source:HGNC Symbol;Acc:10773]	tyrosine 3-monooxygenase/tryptophan 5-monooxygenase activation protein, theta polypeptide b [Source:ZFIN;Acc:ZDB-GENE-030131-7135]
gene29505	-2.43756	4.31232	-3.45696	0.00141519	0.0374679	-1.04532	LOC101485905	LOC101485905	anoctamin-1%2C transcript variant X1	NW_020192754.1	40293	96102	55810	ANO1	anoctamin 1, calcium activated chloride channel [Source:HGNC Symbol;Acc:21625]	anoctamin 1, calcium activated chloride channel [Source:ZFIN;Acc:ZDB-GENE-121127-3]
gene8117	-2.54154	4.13269	-3.45665	0.0014164	0.0374679	-1.04555	LOC101469122	LOC101469122	dematin%2C transcript variant X2	NC_036786.1	28144385	28158774	14390	EPB49	erythrocyte membrane protein band 4.9 (dematin) [Source:HGNC Symbol;Acc:3382]	erythrocyte membrane protein band 4.9 (dematin) [Source:ZFIN;Acc:ZDB-GENE-030131-9438]
gene11460	-2.4261	3.73957	-3.45423	0.00142594	0.0375021	-1.05211	LOC101470340	ube2b	ubiquitin conjugating enzyme E2 B	NC_036789.1	22633756	22644510	10755	UBE2A	ubiquitin-conjugating enzyme E2A [Source:HGNC Symbol;Acc:12472]	ubiquitin-conjugating enzyme E2B (RAD6 homolog) [Source:ZFIN;Acc:ZDB-GENE-040718-247]
gene7893	-1.21275	7.77104	-3.60817	0.0009262	0.0299053	-1.05642	LOC101467422	LOC101467422	microtubule-associated protein 1B	NC_036786.1	20659295	20761482	102188	MAP1A	microtubule-associated protein 1A [Source:HGNC Symbol;Acc:6835]	microtubule-associated protein 1A [Source:HGNC Symbol;Acc:6835]
gene16639	-2.22512	2.27935	-3.45225	0.00143382	0.0375999	-1.05765	LOC101469333	tdrp	testis development related protein	NC_036794.1	9970905	9985440	14536	C8orf42	chromosome 8 open reading frame 42 [Source:HGNC Symbol;Acc:26951]	NA
gene8731	-1.49963	6.498	-3.53692	0.00113194	0.0333953	-1.05781	LOC101470400	map1b	microtubule associated protein 1B	NC_036786.1	49371264	49391333	20070	MAP1B	microtubule-associated protein 1B [Source:HGNC Symbol;Acc:6836]	Hypothetical microtubule-associated protein 1b; Uncharacterized protein [Source:UniProtKB/TrEMBL;Acc:B2ZZ14]
gene28577	-2.46081	3.76918	-3.45093	0.00143909	0.0376286	-1.06139	LOC101466286	rmdn3	regulator of microtubule dynamics 3%2C transcript variant X1	NW_020192600.1	72364	81110	8747	RMDN3	regulator of microtubule dynamics 3 [Source:HGNC Symbol;Acc:25550]	regulator of microtubule dynamics 3 [Source:ZFIN;Acc:ZDB-GENE-041014-256]
gene6500	-1.31317	7.13669	-3.5709	0.00102884	0.0318183	-1.06777	LOC101475716	LOC101475716	transcription activator BRG1%2C transcript variant X1	NC_036785.1	22292517	22321578	29062	SMARCA4	SWI/SNF related, matrix associated, actin dependent regulator of chromatin, subfamily a, member 4 [Source:HGNC Symbol;Acc:11100]	SWI/SNF related, matrix associated, actin dependent regulator of chromatin, subfamily a, member 4 [Source:HGNC Symbol;Acc:11100]
gene1773	1.00819	8.34032	3.65804	0.000804196	0.0277294	-1.06781	LOC101487619	zbtb3	zinc finger and BTB domain containing 3%2C transcript variant X1	NC_036781.1	27751270	27757596	6327	ZBTB3	zinc finger and BTB domain containing 3 [Source:HGNC Symbol;Acc:22918]	zinc finger and BTB domain containing 3 [Source:HGNC Symbol;Acc:22918]
gene25963	2.58643	1.74701	3.44356	0.00146886	0.0381313	-1.06917	LOC101486571	eef1akmt3	EEF1A lysine methyltransferase 3%2C transcript variant X1	NW_020192361.1	637979	640279	2301	METTL21B	methyltransferase like 21B [Source:HGNC Symbol;Acc:24936]	methyltransferase like 21A [Source:ZFIN;Acc:ZDB-GENE-050320-145]
gene8801	-2.26376	2.70255	-3.44981	0.00144359	0.0376919	-1.06941	LOC101482601	LOC101482601	betaine--homocysteine S-methyltransferase 1	NC_036786.1	52617978	52622524	4547	BHMT	betaine--homocysteine S-methyltransferase [Source:HGNC Symbol;Acc:1047]	betaine-homocysteine methyltransferase [Source:ZFIN;Acc:ZDB-GENE-030131-947]
gene12308	-2.26149	2.33304	-3.44775	0.00145188	0.0378119	-1.06992	LOC101468440	rprd2	regulation of nuclear pre-mRNA domain containing 2	NC_036790.1	17408152	17427775	19624	RPRD2	regulation of nuclear pre-mRNA domain containing 2 [Source:HGNC Symbol;Acc:29039]	regulation of nuclear pre-mRNA domain containing 2b [Source:ZFIN;Acc:ZDB-GENE-110719-1]
gene19465	-1.73057	5.76248	-3.48847	0.00129626	0.0355824	-1.0722	LOC101482762	LOC101482762	receptor-type tyrosine-protein phosphatase N2	NC_036797.1	3029616	3253651	224036	PTPRN2	protein tyrosine phosphatase, receptor type, N polypeptide 2 [Source:HGNC Symbol;Acc:9677]	protein tyrosine phosphatase, receptor type, N polypeptide 2 [Source:ZFIN;Acc:ZDB-GENE-030131-3758]
gene26178	-2.19441	2.86107	-3.44762	0.00145237	0.0378119	-1.07399	LOC101467829	pim1	Pim-1 proto-oncogene%2C serine/threonine kinase	NW_020192371.1	394294	398282	3989	PIM1	pim-1 oncogene [Source:HGNC Symbol;Acc:8986]	pim-1 oncogene [Source:ZFIN;Acc:ZDB-GENE-061013-139]
gene22179	-1.76168	5.99792	-3.49416	0.0012758	0.035298	-1.08407	LOC101482394	LOC101482394	calmodulin-binding transcription activator 1%2C transcript variant X1	NC_036799.1	20696200	20980234	284035	CAMTA1	calmodulin binding transcription activator 1 [Source:HGNC Symbol;Acc:18806]	calmodulin binding transcription activator 1a [Source:ZFIN;Acc:ZDB-GENE-090312-183]
gene20944	-1.65256	6.39828	-3.51424	0.00120619	0.0342666	-1.09197	LOC101470650	LOC101470650	nesprin-1%2C transcript variant X1	NC_036798.1	15747695	15822926	75232	SYNE1	spectrin repeat containing, nuclear envelope 1 [Source:HGNC Symbol;Acc:17089]	spectrin repeat containing, nuclear envelope 1b [Source:ZFIN;Acc:ZDB-GENE-071218-4]
gene248	1.17041	6.36328	3.56235	0.00105392	0.0322819	-1.09269	LOC105940947	LOC105940947	uncharacterized LOC105940947	NC_036780.1	10801126	10864659	63534	NA	NA	NA
gene11031	-2.15384	5.57738	-3.46249	0.00139356	0.0370278	-1.09518	LOC101479004	LOC101479004	spectrin beta chain%2C non-erythrocytic 1%2C transcript variant X3	NC_036789.1	12001653	12052508	50856	SPTBN2	spectrin, beta, non-erythrocytic 2 [Source:HGNC Symbol;Acc:11276]	spectrin, beta, non-erythrocytic 2 [Source:ZFIN;Acc:ZDB-GENE-030131-787]
gene21502	-2.26558	4.86702	-3.44025	0.0014824	0.0383724	-1.10213	LOC101480989	LOC101480989	myosin light polypeptide 6%2C transcript variant X2	NC_036799.1	2818808	2824222	5415	MYL6B	myosin, light chain 6B, alkali, smooth muscle and non-muscle [Source:HGNC Symbol;Acc:29823]	myosin, light chain 6, alkali, smooth muscle and non-muscle [Source:ZFIN;Acc:ZDB-GENE-041010-28]
gene61	1.03508	7.61497	3.61322	0.000913079	0.0296185	-1.10551	LOC101468443	LOC101468443	E3 ubiquitin-protein ligase MARCH3	NC_036780.1	3249950	3256309	6360	2018-03-03	membrane-associated ring finger (C3HC4) 3, E3 ubiquitin protein ligase [Source:HGNC Symbol;Acc:28728]	zgc:158785 [Source:ZFIN;Acc:ZDB-GENE-070112-1712]
gene7481	-2.59185	3.38433	-3.43704	0.00149566	0.0384952	-1.10607	LOC101470224	sema3e	semaphorin 3E	NC_036786.1	10057571	10077925	20355	SEMA3E	sema domain, immunoglobulin domain (Ig), short basic domain, secreted, (semaphorin) 3E [Source:HGNC Symbol;Acc:10727]	sema domain, immunoglobulin domain (Ig), short basic domain, secreted, (semaphorin) 3E [Source:ZFIN;Acc:ZDB-GENE-030131-7864]
gene5681	-2.2012	2.82874	-3.43332	0.00151121	0.0386203	-1.10798	LOC101483072	ppp1r1a	protein phosphatase 1 regulatory inhibitor subunit 1A%2C transcript variant X1	NC_036784.1	32019166	32049988	30823	PPP1R1A	protein phosphatase 1, regulatory (inhibitor) subunit 1A [Source:HGNC Symbol;Acc:9286]	protein phosphatase 1, regulatory (inhibitor) subunit 1C [Source:ZFIN;Acc:ZDB-GENE-040718-273]
gene3499	-2.58312	4.58756	-3.43167	0.00151814	0.0387425	-1.11061	LOC101475004	LOC101475004	trafficking protein particle complex subunit 5	NC_036783.1	5961437	5964118	2682	TRAPPC5	trafficking protein particle complex 5 [Source:HGNC Symbol;Acc:23067]	trafficking protein particle complex 5 [Source:ZFIN;Acc:ZDB-GENE-040718-185]
gene17864	2.3873	3.50544	3.43424	0.00150736	0.0386203	-1.11235	LOC101487672	fancb	Fanconi anemia complementation group B%2C transcript variant X1	NC_036795.1	16018600	16036304	17705	FANCB	Fanconi anemia, complementation group B [Source:HGNC Symbol;Acc:3583]	Fanconi anemia, complementation group B [Source:ZFIN;Acc:ZDB-GENE-060510-1]
gene6647	-2.65567	4.05511	-3.42676	0.00153893	0.0390774	-1.11864	LOC101481972	gne	glucosamine (UDP-N-acetyl)-2-epimerase/N-acetylmannosamine kinase%2C transcript variant X1	NC_036785.1	26682319	26707323	25005	GNE	glucosamine (UDP-N-acetyl)-2-epimerase/N-acetylmannosamine kinase [Source:HGNC Symbol;Acc:23657]	glucosamine (UDP-N-acetyl)-2-epimerase/N-acetylmannosamine kinase [Source:ZFIN;Acc:ZDB-GENE-040426-1848]
gene18744	-1.75125	6.31853	-3.49639	0.00126791	0.0352596	-1.11928	LOC106675012	LOC106675012	coiled-coil domain-containing protein 136%2C transcript variant X2	NC_036796.1	13293990	13312828	18839	CCDC136	coiled-coil domain containing 136 [Source:HGNC Symbol;Acc:22225]	NA
gene25898	-2.22923	2.90405	-3.42653	0.00153991	0.0390774	-1.12657	LOC101483358	hck	HCK proto-oncogene%2C Src family tyrosine kinase	NW_020192357.1	385868	406810	20943	HCK	hemopoietic cell kinase [Source:HGNC Symbol;Acc:4840]	hemopoietic cell kinase [Source:ZFIN;Acc:ZDB-GENE-090313-72]
gene26768	-2.31599	4.90271	-3.43012	0.00152464	0.0388535	-1.12706	LOC101467020	LOC101467020	ceruloplasmin-like	NW_020192411.1	271475	285538	14064	CP	ceruloplasmin (ferroxidase) [Source:HGNC Symbol;Acc:2295]	ceruloplasmin [Source:ZFIN;Acc:ZDB-GENE-010522-1]
gene30928	2.678	1.94556	3.41865	0.00157387	0.0396293	-1.12842	LOC112433306	LOC112433306	nuclear factor 7%2C ovary-like	NW_020193280.1	17369	24571	7203	TRIM35	tripartite motif containing 35 [Source:HGNC Symbol;Acc:16285]	tripartite motif containing 35-29 [Source:ZFIN;Acc:ZDB-GENE-041114-35]
gene16742	-2.34484	2.40341	-3.42216	0.00155866	0.0393871	-1.13398	LOC101473489	LOC101473489	reticulon-4-interacting protein 1 homolog%2C mitochondrial	NC_036794.1	12924528	12933371	8844	RTN4IP1	reticulon 4 interacting protein 1 [Source:HGNC Symbol;Acc:18647]	reticulon 4 interacting protein 1 [Source:ZFIN;Acc:ZDB-GENE-040426-1314]
gene11437	-2.43532	3.79738	-3.41831	0.00157538	0.0396293	-1.1387	LOC101486049	LOC101486049	janus kinase and microtubule-interacting protein 2%2C transcript variant X1	NC_036789.1	21053603	21081612	28010	JAKMIP2	janus kinase and microtubule interacting protein 2 [Source:HGNC Symbol;Acc:29067]	janus kinase and microtubule interacting protein 2 [Source:ZFIN;Acc:ZDB-GENE-091204-293]
gene19112	-2.55693	2.47305	-3.41704	0.00158093	0.0396318	-1.14851	LOC101487485	fgl2	fibrinogen like 2	NC_036796.1	27435215	27444691	9477	FGL2	fibrinogen-like 2 [Source:HGNC Symbol;Acc:3696]	fibrinogen-like 2 [Source:ZFIN;Acc:ZDB-GENE-030131-9506]
gene23058	-2.48995	4.54519	-3.41476	0.00159092	0.0396512	-1.15084	LOC101480862	LOC101480862	NADH dehydrogenase [ubiquinone] flavoprotein 1%2C mitochondrial%2C transcript variant X1	NC_036800.1	12767257	12772149	4893	NDUFV1	NADH dehydrogenase (ubiquinone) flavoprotein 1, 51kDa [Source:HGNC Symbol;Acc:7716]	NADH dehydrogenase (ubiquinone) flavoprotein 1 [Source:ZFIN;Acc:ZDB-GENE-040808-73]
gene119	1.21123	7.12551	3.57508	0.00101681	0.0315124	-1.15371	LOC111501672	LOC111501672	uncharacterized LOC111501672	NC_036780.1	5682445	5691867	9423	NA	NA	NA
gene25040	-2.38902	3.02755	-3.41582	0.00158628	0.0396416	-1.15622	LOC101487555	arpc2	actin related protein 2/3 complex subunit 2	NC_036801.1	41567876	41579013	11138	ARPC2	actin related protein 2/3 complex, subunit 2, 34kDa [Source:HGNC Symbol;Acc:705]	actin related protein 2/3 complex, subunit 2 [Source:ZFIN;Acc:ZDB-GENE-030131-5276]
gene15801	-2.35669	4.39281	-3.40936	0.00161489	0.0401899	-1.1619	LOC101477199	dyrk1a	dual specificity tyrosine phosphorylation regulated kinase 1A%2C transcript variant X1	NC_036793.1	23822670	23834386	11717	DYRK1A	dual-specificity tyrosine-(Y)-phosphorylation regulated kinase 1A [Source:HGNC Symbol;Acc:3091]	dual-specificity tyrosine-(Y)-phosphorylation regulated kinase 1A, b [Source:ZFIN;Acc:ZDB-GENE-030131-5677]
gene31017	2.57	2.51434	3.40093	0.00165297	0.0407447	-1.17072	LOC112433379	LOC112433379	2'%2C5'-phosphodiesterase 12-like	NW_020193300.1	9008	15822	6815	PDE12	phosphodiesterase 12 [Source:HGNC Symbol;Acc:25386]	phosphodiesterase 12 [Source:ZFIN;Acc:ZDB-GENE-060519-25]
gene20693	2.42712	0.90304	3.39975	0.00165836	0.040822	-1.17294	LOC101485503	LOC101485503		NC_036798.1	9415916	9461143	45228	NA	NA	NA
gene23909	2.44085	0.90304	3.39872	0.00166306	0.0408817	-1.17535	LOC101472560	LOC101472560	cytosolic carboxypeptidase 6	NC_036801.1	3942985	4117429	174445	NA	NA	NA
gene21401	-2.54832	5.54115	-3.42223	0.00155835	0.0393871	-1.17747	LOC101487678	uba1	ubiquitin like modifier activating enzyme 1%2C transcript variant X2	NC_036799.1	922579	938734	16156	UBA1	ubiquitin-like modifier activating enzyme 1 [Source:HGNC Symbol;Acc:12469]	ubiquitin-like modifier activating enzyme 1 [Source:ZFIN;Acc:ZDB-GENE-040426-2009]
gene16330	2.41714	0.90304	3.39499	0.0016803	0.0409842	-1.18417	LOC101466770	LOC101466770	alpha-1-antitrypsin homolog	NC_036794.1	624416	626408	1993	SERPINA1	serpin peptidase inhibitor, clade A (alpha-1 antiproteinase, antitrypsin), member 1 [Source:HGNC Symbol;Acc:8941]	CantFind
gene21793	-2.33296	4.31638	-3.39521	0.00167926	0.0409842	-1.19501	LOC101486961	ddost	dolichyl-diphosphooligosaccharide--protein glycosyltransferase non-catalytic subunit	NC_036799.1	9869849	9874290	4442	DDOST	dolichyl-diphosphooligosaccharide--protein glycosyltransferase [Source:HGNC Symbol;Acc:2728]	dolichyl-diphosphooligosaccharide-protein glycosyltransferase [Source:ZFIN;Acc:ZDB-GENE-040426-2147]
gene12802	1.22344	6.5527	3.52878	0.00115807	0.0337366	-1.20545	LOC105941316	LOC105941316	uncharacterized LOC105941316	NC_036790.1	29650016	29660145	10130	NA	NA	NA
gene23959	-2.43897	2.40048	-3.39208	0.00169386	0.0410984	-1.20676	LOC101480206	LOC101480206	ras-related protein Rab-11B	NC_036801.1	5416239	5421389	5151	RAB11B	RAB11B, member RAS oncogene family [Source:HGNC Symbol;Acc:9761]	RAB11B, member RAS oncogene family, b [Source:ZFIN;Acc:ZDB-GENE-040718-293]
gene26576	-1.60286	6.12326	-3.45508	0.00142257	0.0374679	-1.20956	LOC101477848	LOC101477848	uncharacterized LOC101477848	NW_020192397.1	410639	416240	5602	CBX7	chromobox homolog 7 [Source:HGNC Symbol;Acc:1557]	chromobox homolog 7a [Source:ZFIN;Acc:ZDB-GENE-050417-400]
gene1112	-1.33056	6.74163	-3.49648	0.00126758	0.0352596	-1.20961	LOC101482722	LOC101482722	heterogeneous nuclear ribonucleoprotein A0%2C transcript variant X2	NC_036781.1	4097212	4101371	4160	HNRNPA0	heterogeneous nuclear ribonucleoprotein A0 [Source:HGNC Symbol;Acc:5030]	heterogeneous nuclear ribonucleoprotein A0a [Source:ZFIN;Acc:ZDB-GENE-030131-2249]
gene15093	-2.13276	2.25301	-3.38853	0.00171053	0.0413537	-1.21108	LOC101487477	LOC101487477	coiled-coil domain-containing protein 85A%2C transcript variant X1	NC_036792.1	31048762	31095681	46920	CCDC85A	coiled-coil domain containing 85A [Source:HGNC Symbol;Acc:29400]	coiled-coil domain containing 85A [Source:ZFIN;Acc:ZDB-GENE-080220-55]
gene18673	-1.97598	5.17646	-3.40527	0.00163325	0.0405908	-1.21155	LOC101487812	mast2	microtubule associated serine/threonine kinase 2%2C transcript variant X6	NC_036796.1	11352794	11493815	141022	MAST2	microtubule associated serine/threonine kinase 2 [Source:HGNC Symbol;Acc:19035]	microtubule associated serine/threonine kinase 2 [Source:HGNC Symbol;Acc:19035]
gene22919	-2.16062	2.24706	-3.38822	0.00171201	0.0413537	-1.21167	LOC101481629	tfap2e	transcription factor AP-2 epsilon%2C transcript variant X2	NC_036800.1	9096745	9110008	13264	TFAP2E	transcription factor AP-2 epsilon (activating enhancer binding protein 2 epsilon) [Source:HGNC Symbol;Acc:30774]	transcription factor AP-2 epsilon [Source:ZFIN;Acc:ZDB-GENE-040426-1455]
gene5319	2.71133	2.25901	3.38299	0.00173689	0.0417315	-1.21321	LOC101464012	LOC101464012	retinoid-binding protein 7	NC_036784.1	20897518	20898638	1121	RBP7	retinol binding protein 7, cellular [Source:HGNC Symbol;Acc:30316]	retinol binding protein 7b, cellular [Source:ZFIN;Acc:ZDB-GENE-081022-134]
gene14355	-1.1648	7.34116	-3.52798	0.00116067	0.0337366	-1.21743	LOC101478971	LOC101478971	1-phosphatidylinositol 4%2C5-bisphosphate phosphodiesterase beta-1	NC_036792.1	5769498	5807160	37663	PLCB1	phospholipase C, beta 1 (phosphoinositide-specific) [Source:HGNC Symbol;Acc:15917]	phospholipase C, beta 1 (phosphoinositide-specific) [Source:HGNC Symbol;Acc:15917]
gene27940	-2.27812	3.28269	-3.38661	0.00171959	0.0414654	-1.21874	LOC101470710	LOC101470710	fibrous sheath CABYR-binding protein	NW_020192515.1	2583	10253	7671	NA	NA	aspartate beta-hydroxylase [Source:ZFIN;Acc:ZDB-GENE-031112-5]
gene8631	-2.24632	4.27903	-3.38104	0.00174624	0.0418527	-1.22878	LOC101477833	nedd4l	neural precursor cell expressed%2C developmentally down-regulated 4-like%2C E3 ubiquitin protein ligase%2C transcript variant X1	NC_036786.1	46844236	46886748	42513	NEDD4L	neural precursor cell expressed, developmentally down-regulated 4-like, E3 ubiquitin protein ligase [Source:HGNC Symbol;Acc:7728]	neural precursor cell expressed, developmentally down-regulated 4-like [Source:ZFIN;Acc:ZDB-GENE-051118-2]
gene3634	2.96552	2.09316	3.37679	0.00176681	0.042059	-1.22989	LOC106675238	LOC106675238	adenylosuccinate lyase-like	NC_036783.1	8696317	8702097	5781	ADSL	adenylosuccinate lyase [Source:HGNC Symbol;Acc:291]	adenylosuccinate lyase [Source:ZFIN;Acc:ZDB-GENE-030131-6363]
gene10965	-2.16318	2.29171	-3.38097	0.00174656	0.0418527	-1.23034	LOC101464973	mtmr2	myotubularin related protein 2%2C transcript variant X1	NC_036789.1	11003269	11013025	9757	MTMR2	myotubularin related protein 2 [Source:HGNC Symbol;Acc:7450]	myotubularin related protein 2 [Source:ZFIN;Acc:ZDB-GENE-990715-14]
gene30338	2.57526	1.80666	3.37272	0.00178671	0.042199	-1.23629	LOC112432850	LOC112432850	E3 ubiquitin-protein ligase TRIM21-like	NW_020193021.1	8567	13187	4621	TRIM25	tripartite motif containing 25 [Source:HGNC Symbol;Acc:12932]	bloodthirsty-related gene family, member 9 [Source:ZFIN;Acc:ZDB-GENE-080722-46]
gene8594	-2.25453	2.7645	-3.37957	0.00175331	0.0419032	-1.24213	LOC101483595	brinp1	BMP/retinoic acid inducible neural specific 1	NC_036786.1	45406280	45524566	118287	DBC1	deleted in bladder cancer 1 [Source:HGNC Symbol;Acc:2687]	deleted in bladder cancer 1 [Source:HGNC Symbol;Acc:2687]
gene19885	-1.61577	5.94567	-3.43347	0.00151055	0.0386203	-1.24259	LOC101478824	LOC101478824	ras-related protein Rab-6B	NC_036797.1	14560523	14566934	6412	RAB6B	RAB6B, member RAS oncogene family [Source:HGNC Symbol;Acc:14902]	RAB6B, member RAS oncogene family b [Source:ZFIN;Acc:ZDB-GENE-050320-28]
gene3638	-2.41723	3.86439	-3.37322	0.00178425	0.0421961	-1.24651	LOC101475680	LOC101475680	cyclic AMP-dependent transcription factor ATF-4	NC_036783.1	8773822	8776712	2891	ATF4	activating transcription factor 4 (tax-responsive enhancer element B67) [Source:HGNC Symbol;Acc:786]	activating transcription factor 4b1 (tax-responsive enhancer element B67) [Source:ZFIN;Acc:ZDB-GENE-040426-2340]
gene336	-2.62845	3.77621	-3.37421	0.00177939	0.0421364	-1.24761	LOC101479371	ahctf1	AT-hook containing transcription factor 1%2C transcript variant X2	NC_036780.1	14121525	14143325	21801	AHCTF1	AT hook containing transcription factor 1 [Source:HGNC Symbol;Acc:24618]	AT hook containing transcription factor 1 [Source:ZFIN;Acc:ZDB-GENE-070521-2]
gene536	-1.80442	5.75162	-3.41641	0.00158369	0.0396318	-1.24808	LOC101480745	ipo7	importin 7	NC_036780.1	20032783	20048063	15281	IPO7	importin 7 [Source:HGNC Symbol;Acc:9852]	importin 7 [Source:ZFIN;Acc:ZDB-GENE-030131-458]
gene8748	-2.41583	4.7858	-3.37742	0.00176373	0.0420409	-1.25035	LOC101477552	fnbp1	formin binding protein 1%2C transcript variant X3	NC_036786.1	50736332	50790840	54509	FNBP1	formin binding protein 1 [Source:HGNC Symbol;Acc:17069]	formin binding protein 1 [Source:HGNC Symbol;Acc:17069]
gene19176	-2.50829	3.56999	-3.3749	0.00177601	0.0421115	-1.2511	LOC101478314	usp15	ubiquitin specific peptidase 15%2C transcript variant X1	NC_036796.1	29805653	29834445	28793	USP15	ubiquitin specific peptidase 15 [Source:HGNC Symbol;Acc:12613]	ubiquitin specific peptidase 15 [Source:HGNC Symbol;Acc:12613]
gene10088	-1.63281	5.73893	-3.41473	0.00159105	0.0396512	-1.26057	LOC101485318	LOC101485318	serine/threonine-protein kinase LMTK1%2C transcript variant X1	NC_036787.1	22642082	22710290	68209	AATK	apoptosis-associated tyrosine kinase [Source:HGNC Symbol;Acc:21]	apoptosis-associated tyrosine kinase b [Source:ZFIN;Acc:ZDB-GENE-100812-6]
gene6833	-1.59262	5.99071	-3.42688	0.00153843	0.0390774	-1.26306	LOC101472271	nt5c2	5'-nucleotidase%2C cytosolic II	NC_036785.1	30097762	30121228	23467	NT5C2	5'-nucleotidase, cytosolic II [Source:HGNC Symbol;Acc:8022]	5'-nucleotidase, cytosolic IIb [Source:ZFIN;Acc:ZDB-GENE-061013-522]
gene12774	-1.88855	5.272	-3.3894	0.00170645	0.0413298	-1.26409	LOC101464846	LOC101464846	ras/Rap GTPase-activating protein SynGAP%2C transcript variant X9	NC_036790.1	28368088	28554595	186508	SYNGAP1	synaptic Ras GTPase activating protein 1 [Source:HGNC Symbol;Acc:11497]	synaptic Ras GTPase activating protein 1 [Source:HGNC Symbol;Acc:11497]
gene20573	-2.01004	5.45237	-3.39424	0.00168377	0.0409842	-1.26507	LOC101478507	lg19h20orf194	linkage group 19 C20orf194 homolog%2C transcript variant X1	NC_036798.1	5780335	5803677	23343	C20orf194	chromosome 20 open reading frame 194 [Source:HGNC Symbol;Acc:17721]	chromosome 20 open reading frame 194 [Source:HGNC Symbol;Acc:17721]
gene16951	-2.35419	3.12388	-3.36884	0.00180591	0.0425413	-1.26529	LOC101473087	btbd9	BTB domain containing 9	NC_036794.1	19917438	19927248	9811	BTBD9	BTB (POZ) domain containing 9 [Source:HGNC Symbol;Acc:21228]	BTB (POZ) domain containing 9 [Source:ZFIN;Acc:ZDB-GENE-040704-39]
gene22714	-2.21697	5.18637	-3.37979	0.00175225	0.0419032	-1.26774	LOC101478652	LOC101478652	epsin-1%2C transcript variant X3	NC_036800.1	4353527	4367118	13592	EPN1	epsin 1 [Source:HGNC Symbol;Acc:21604]	zgc:194578 [Source:ZFIN;Acc:ZDB-GENE-081022-126]
gene20058	-2.11689	5.2075	-3.37508	0.00177517	0.0421115	-1.28142	LOC101468366	LOC101468366	60S ribosomal protein L5	NC_036797.1	18770688	18774318	3631	RPL5	ribosomal protein L5 [Source:HGNC Symbol;Acc:10360]	ribosomal protein L5b [Source:ZFIN;Acc:ZDB-GENE-040625-93]
gene6985	-1.73306	6.32349	-3.43348	0.00151054	0.0386203	-1.28414	LOC101473063	LOC101473063	neuronal pentraxin-1%2C transcript variant X1	NC_036785.1	35025684	35030429	4746	NPTX1	neuronal pentraxin I [Source:HGNC Symbol;Acc:7952]	neuronal pentraxin 1 like [Source:ZFIN;Acc:ZDB-GENE-040426-2418]
gene5700	-1.52031	6.21788	-3.4338	0.00150917	0.0386203	-1.28599	LOC101473986	ddit3	DNA damage inducible transcript 3%2C transcript variant X1	NC_036784.1	32489948	32493946	3999	DDIT3	DNA-damage-inducible transcript 3 [Source:HGNC Symbol;Acc:2726]	DNA-damage-inducible transcript 3 [Source:ZFIN;Acc:ZDB-GENE-070410-90]
gene19851	-2.32026	4.81513	-3.36372	0.00183153	0.0430887	-1.2864	LOC101469043	LOC101469043	rho GTPase-activating protein 21%2C transcript variant X3	NC_036797.1	14007854	14044784	36931	ARHGAP21	Rho GTPase activating protein 21 [Source:HGNC Symbol;Acc:23725]	Rho GTPase activating protein 21b [Source:ZFIN;Acc:ZDB-GENE-030131-4944]
gene10971	1.46108	5.64308	3.4517	0.00143601	0.0376027	-1.29293	LOC101480432	LOC101480432	lysophosphatidic acid receptor 6	NC_036789.1	11077970	11079804	1835	LPAR6	lysophosphatidic acid receptor 6 [Source:HGNC Symbol;Acc:15520]	lysophosphatidic acid receptor 6b [Source:ZFIN;Acc:ZDB-GENE-110408-67]
gene13502	-2.24693	2.6824	-3.35422	0.00188003	0.0439435	-1.3006	LOC101466586	pik3ip1	phosphoinositide-3-kinase interacting protein 1%2C transcript variant X1	NC_036791.1	17659522	17666350	6829	PIK3IP1	phosphoinositide-3-kinase interacting protein 1 [Source:HGNC Symbol;Acc:24942]	phosphoinositide-3-kinase interacting protein 1 [Source:ZFIN;Acc:ZDB-GENE-031030-14]
gene5796	-2.36775	3.14284	-3.35363	0.00188304	0.0439572	-1.30248	LOC101481418	trim2	tripartite motif containing 2%2C transcript variant X2	NC_036785.1	167294	195704	28411	TRIM2	tripartite motif containing 2 [Source:HGNC Symbol;Acc:15974]	tripartite motif-containing 2a [Source:ZFIN;Acc:ZDB-GENE-050327-99]
gene21185	-2.02103	4.94419	-3.35848	0.00185811	0.0435097	-1.31	LOC101465029	snx14	sorting nexin 14%2C transcript variant X1	NC_036798.1	21931011	21949520	18510	SNX14	sorting nexin 14 [Source:HGNC Symbol;Acc:14977]	sorting nexin 14 [Source:ZFIN;Acc:ZDB-GENE-040724-144]
gene22292	-2.21268	2.28441	-3.34571	0.00192447	0.0445204	-1.31476	LOC101480417	LOC101480417	heme transporter hrg1-B	NC_036799.1	22855760	22859221	3462	SLC48A1	solute carrier family 48 (heme transporter), member 1 [Source:HGNC Symbol;Acc:26035]	solute carrier family 48 (heme transporter), member 1a [Source:ZFIN;Acc:ZDB-GENE-040718-121]
gene15852	-2.47056	4.19906	-3.34427	0.0019321	0.044527	-1.31598	LOC101475367	LOC101475367	serine/arginine-rich splicing factor 1%2C transcript variant X1	NC_036793.1	25829531	25834095	4565	SRSF1	serine/arginine-rich splicing factor 1 [Source:HGNC Symbol;Acc:10780]	serine/arginine-rich splicing factor 1a [Source:ZFIN;Acc:ZDB-GENE-040426-1950]
gene23049	-2.28346	4.5968	-3.34554	0.00192535	0.0445204	-1.32099	LOC101477455	ubap2l	ubiquitin associated protein 2 like%2C transcript variant X2	NC_036800.1	12664303	12688785	24483	UBAP2L	ubiquitin associated protein 2-like [Source:HGNC Symbol;Acc:29877]	ubiquitin associated protein 2-like [Source:ZFIN;Acc:ZDB-GENE-060503-244]
gene8716	-2.15469	2.25647	-3.34219	0.00194313	0.0446674	-1.32234	LOC101466527	spout1	SPOUT domain containing methyltransferase 1	NC_036786.1	49081331	49085206	3876	C9orf114	chromosome 9 open reading frame 114 [Source:HGNC Symbol;Acc:26933]	chromosome 9 open reading frame 114 [Source:HGNC Symbol;Acc:26933]
gene20287	2.54033	1.33117	3.33191	0.00199869	0.0453639	-1.33159	LOC112430088	LOC112430088	caspase-8-like%2C transcript variant X1	NC_036797.1	23090184	23092236	2053	CASP8	caspase 8, apoptosis-related cysteine peptidase [Source:HGNC Symbol;Acc:1509]	zgc:194469 [Source:ZFIN;Acc:ZDB-GENE-081022-114]
gene20081	-1.39832	6.60445	-3.43938	0.00148601	0.0384109	-1.33313	LOC101484391	LOC101484391	sodium/potassium-transporting ATPase subunit beta-3	NC_036797.1	19042597	19049120	6524	ATP1B3	ATPase, Na+/K+ transporting, beta 3 polypeptide [Source:HGNC Symbol;Acc:806]	ATPase, Na+/K+ transporting, beta 3a polypeptide [Source:ZFIN;Acc:ZDB-GENE-990415-167]
gene20900	-2.31363	3.48001	-3.33539	0.00197975	0.0453166	-1.3391	LOC101476068	tmx1	thioredoxin related transmembrane protein 1	NC_036798.1	15166257	15175510	9254	TMX1	thioredoxin-related transmembrane protein 1 [Source:HGNC Symbol;Acc:15487]	thioredoxin-related transmembrane protein 1 [Source:ZFIN;Acc:ZDB-GENE-030131-2327]
gene14678	-2.37418	3.734	-3.33462	0.00198392	0.0453166	-1.34129	LOC101469196	LOC101469196	Kv channel-interacting protein 2%2C transcript variant X1	NC_036792.1	17221470	17342918	121449	KCNIP2	Kv channel interacting protein 2 [Source:HGNC Symbol;Acc:15522]	Kv channel interacting protein 2 [Source:HGNC Symbol;Acc:15522]
gene9492	-1.65682	5.65177	-3.37848	0.00175862	0.0419745	-1.34283	LOC101479367	luc7l	LUC7 like%2C transcript variant X2	NC_036787.1	8310948	8317696	6749	LUC7L	LUC7-like (S. cerevisiae) [Source:HGNC Symbol;Acc:6723]	LUC7-like (S. cerevisiae) [Source:ZFIN;Acc:ZDB-GENE-040625-111]
gene4936	-2.26177	4.02588	-3.33236	0.00199625	0.0453639	-1.34283	LOC101467549	LOC101467549	vitamin D3 receptor B%2C transcript variant X1	NC_036784.1	12877961	12915262	37302	VDR	vitamin D (1,25- dihydroxyvitamin D3) receptor [Source:HGNC Symbol;Acc:12679]	vitamin D receptor b [Source:ZFIN;Acc:ZDB-GENE-080403-10]
gene30583	-2.30781	3.17851	-3.33375	0.00198869	0.0453639	-1.34797	LOC101478946	LOC101478946	interferon regulatory factor 2-binding protein 2-B	NW_020193112.1	38131	42425	4295	IRF2BP2	interferon regulatory factor 2 binding protein 2 [Source:HGNC Symbol;Acc:21729]	interferon regulatory factor 2 binding protein 2a [Source:ZFIN;Acc:ZDB-GENE-030131-7809]
gene2843	-2.2838	3.68469	-3.3274	0.00202357	0.0457024	-1.35524	LOC101472773	acadvl	acyl-CoA dehydrogenase very long chain%2C transcript variant X2	NC_036782.1	22444385	22462180	17796	ACADVL	acyl-CoA dehydrogenase, very long chain [Source:HGNC Symbol;Acc:92]	acyl-Coenzyme A dehydrogenase, very long chain [Source:ZFIN;Acc:ZDB-GENE-030131-899]
gene3887	-2.34915	3.59775	-3.32784	0.0020211	0.0457024	-1.35932	LOC101475282	LOC101475282	TOM1-like protein 2%2C transcript variant X1	NC_036783.1	15121167	15142451	21285	TOM1L2	target of myb1-like 2 (chicken) [Source:HGNC Symbol;Acc:11984]	target of myb1-like 2 (chicken) [Source:HGNC Symbol;Acc:11984]
gene6208	-2.26198	5.00412	-3.33474	0.00198325	0.0453166	-1.36248	LOC101482896	uchl1	ubiquitin C-terminal hydrolase L1	NC_036785.1	13158375	13164367	5993	UCHL1	ubiquitin carboxyl-terminal esterase L1 (ubiquitin thiolesterase) [Source:HGNC Symbol;Acc:12513]	ubiquitin carboxyl-terminal esterase L1 (ubiquitin thiolesterase) [Source:ZFIN;Acc:ZDB-GENE-030131-3844]
gene8822	2.56031	2.04995	3.31779	0.00207753	0.0463418	-1.3656	LOC101485864	LOC101485864		NC_036786.1	53121556	53123217	1662	NA	NA	NA
gene15977	-2.10794	2.2374	-3.3237	0.00204418	0.0459952	-1.36592	LOC101473556	usp16	ubiquitin specific peptidase 16	NC_036793.1	29135878	29141060	5183	USP16	ubiquitin specific peptidase 16 [Source:HGNC Symbol;Acc:12614]	ubiquitin specific protease 16 [Source:ZFIN;Acc:ZDB-GENE-030131-4153]
gene15498	-2.22164	3.87255	-3.32193	0.00205411	0.0461039	-1.3671	LOC101469148	fam168a	family with sequence similarity 168 member A%2C transcript variant X1	NC_036793.1	15815877	15860635	44759	FAM168A	family with sequence similarity 168, member A [Source:HGNC Symbol;Acc:28999]	family with sequence similarity 168, member A [Source:ZFIN;Acc:ZDB-GENE-060825-128]
gene21619	-2.11943	5.26541	-3.34111	0.0019489	0.0447429	-1.37027	LOC101470824	kif1b	kinesin family member 1B%2C transcript variant X2	NC_036799.1	5025374	5087612	62239	KIF1C	kinesin family member 1C [Source:HGNC Symbol;Acc:6317]	kinesin family member 1B [Source:ZFIN;Acc:ZDB-GENE-030820-1]
gene812	-1.93254	5.5128	-3.35151	0.00189407	0.0441574	-1.37791	LOC101480409	LOC101480409	40S ribosomal protein S17%2C transcript variant X2	NC_036780.1	29496704	29500745	4042	RPS17	ribosomal protein S17 [Source:HGNC Symbol;Acc:10397]	ribosomal protein S17 [Source:ZFIN;Acc:ZDB-GENE-040426-1852]
gene5637	-2.26291	3.02826	-3.32107	0.00205892	0.0461176	-1.38067	LOC101483648	rtf2	replication termination factor 2	NC_036784.1	30330324	30353577	23254	RTFDC1	replication termination factor 2 domain containing 1 [Source:HGNC Symbol;Acc:15890]	replication termination factor 2 domain containing 1 [Source:ZFIN;Acc:ZDB-GENE-030131-4825]
gene23608	2.61792	2.63424	3.31249	0.00210785	0.0466045	-1.38092	LOC101487354	LOC101487354	uncharacterized LOC101487354	NC_036800.1	28927376	28941451	14076	MPZL2	myelin protein zero-like 2 [Source:HGNC Symbol;Acc:3496]	myelin protein zero-like 2b [Source:ZFIN;Acc:ZDB-GENE-030131-8774]
gene19256	-2.17698	3.25566	-3.31839	0.00207409	0.0463223	-1.38188	LOC101475355	LOC101475355	uncharacterized LOC101475355%2C transcript variant X1	NC_036796.1	33538737	33548715	9979	SENP5	SUMO1/sentrin specific peptidase 5 [Source:HGNC Symbol;Acc:28407]	SUMO/sentrin specific peptidase 5 [Source:ZFIN;Acc:ZDB-GENE-050208-772]
gene26695	-2.35033	3.72273	-3.31612	0.00208704	0.0463821	-1.38266	LOC101470720	LOC101470720	cAMP-dependent protein kinase type II-alpha regulatory subunit	NW_020192407.1	330543	376671	46129	PRKAR2A	protein kinase, cAMP-dependent, regulatory, type II, alpha [Source:HGNC Symbol;Acc:9391]	protein kinase, cAMP-dependent, regulatory, type II, alpha A [Source:ZFIN;Acc:ZDB-GENE-030131-1007]
gene1680	-2.44414	3.41568	-3.31562	0.00208987	0.0463879	-1.39233	LOC101479585	LOC101479585	serine/threonine-protein phosphatase 2A 55 kDa regulatory subunit B gamma isoform%2C transcript variant X2	NC_036781.1	25575287	25596556	21270	PPP2R2C	protein phosphatase 2, regulatory subunit B, gamma [Source:HGNC Symbol;Acc:9306]	protein phosphatase 2 (formerly 2A), regulatory subunit B, gamma isoform [Source:ZFIN;Acc:ZDB-GENE-051120-168]
gene15024	-1.47473	6.39743	-3.40249	0.00164582	0.0407447	-1.39293	LOC101486132	LOC101486132	regulating synaptic membrane exocytosis protein 1%2C transcript variant X1	NC_036792.1	28146478	28265423	118946	RIMS1	regulating synaptic membrane exocytosis 1 [Source:HGNC Symbol;Acc:17282]	regulating synaptic membrane exocytosis 1a [Source:ZFIN;Acc:ZDB-GENE-090312-135]
gene8926	2.518	1.72186	3.30488	0.00215216	0.0473633	-1.39472	LOC101464448	lcat	lecithin-cholesterol acyltransferase	NC_036786.1	55987837	55996113	8277	LCAT	lecithin-cholesterol acyltransferase [Source:HGNC Symbol;Acc:6522]	lecithin-cholesterol acyltransferase [Source:ZFIN;Acc:ZDB-GENE-010716-3]
gene3787	-2.29573	2.93608	-3.31213	0.00210995	0.0466045	-1.404	LOC101486596	hspbp1	HSPA (Hsp70) binding protein 1	NC_036783.1	12468821	12473478	4658	HSPBP1	HSPA (heat shock 70kDa) binding protein, cytoplasmic cochaperone 1 [Source:HGNC Symbol;Acc:24989]	HSPA (heat shock 70kDa) binding protein, cytoplasmic cochaperone 1 [Source:ZFIN;Acc:ZDB-GENE-030219-55]
gene11101	-2.21256	4.94676	-3.31673	0.00208356	0.0463618	-1.40545	LOC101481487	LOC101481487	neurexin-2%2C transcript variant X1	NC_036789.1	13511501	13641300	129800	NRXN2	neurexin 2 [Source:HGNC Symbol;Acc:8009]	neurexin 2a [Source:ZFIN;Acc:ZDB-GENE-070206-5]
gene14342	-1.36033	7.22252	-3.44531	0.00146174	0.0380012	-1.40858	LOC101471480	LOC101471480	uncharacterized LOC101471480	NC_036792.1	5441530	5531905	90376	ZNF804A	zinc finger protein 804A [Source:HGNC Symbol;Acc:21711]	zinc finger protein 804A [Source:ZFIN;Acc:ZDB-GENE-070912-632]
gene18684	-2.25129	2.91488	-3.30861	0.00213035	0.0469977	-1.4117	LOC101483448	LOC101483448	beta-1%2C4-galactosyltransferase 6%2C transcript variant X1	NC_036796.1	11865518	11887978	22461	B4GALT5	UDP-Gal:betaGlcNAc beta 1,4- galactosyltransferase, polypeptide 5 [Source:HGNC Symbol;Acc:928]	UDP-Gal:betaGlcNAc beta 1,4- galactosyltransferase, polypeptide 6 [Source:ZFIN;Acc:ZDB-GENE-040426-789]
gene13740	-2.31035	4.92298	-3.31307	0.0021045	0.0465981	-1.41301	LOC101469810	pi4ka	phosphatidylinositol 4-kinase alpha%2C transcript variant X1	NC_036791.1	24557114	24586491	29378	PI4KA	phosphatidylinositol 4-kinase, catalytic, alpha [Source:HGNC Symbol;Acc:8983]	phosphatidylinositol 4-kinase, catalytic, alpha b [Source:ZFIN;Acc:ZDB-GENE-080220-34]
gene27279	-2.17991	3.12284	-3.30599	0.00214561	0.0472767	-1.41625	LOC112431170	wdr7	WD repeat domain 7	NW_020192453.1	1568	25716	24149	WDR7	WD repeat domain 7 [Source:HGNC Symbol;Acc:13490]	Uncharacterized protein [Source:UniProtKB/TrEMBL;Acc:E7EYD9]
gene20151	-2.20781	3.29641	-3.30304	0.00216297	0.0474905	-1.4195	LOC101469236	LOC101469236	ras-related protein Rab-18-B%2C transcript variant X1	NC_036797.1	19927280	19941226	13947	RAB18	RAB18, member RAS oncogene family [Source:HGNC Symbol;Acc:14244]	RAB18B, member RAS oncogene family [Source:ZFIN;Acc:ZDB-GENE-040801-185]
gene303	2.50098	1.20893	3.29156	0.00223185	0.0483514	-1.42542	LOC101467628	LOC101467628	leukotriene B4 receptor 1	NC_036780.1	12569147	12570596	1450	CMKLR1	chemokine-like receptor 1 [Source:HGNC Symbol;Acc:2121]	Uncharacterized protein [Source:UniProtKB/TrEMBL;Acc:F1QAH0]
gene17067	-1.41616	6.61227	-3.40153	0.00165019	0.0407447	-1.43023	LOC101468439	LOC101468439	syntaxin-binding protein 6-like	NC_036794.1	23379689	23400754	21066	EXOC1	exocyst complex component 1 [Source:HGNC Symbol;Acc:30380]	exocyst complex component 1 [Source:ZFIN;Acc:ZDB-GENE-030131-1057]
gene16868	-1.79789	5.47463	-3.33148	0.00200105	0.0453639	-1.43127	LOC101475544	kif3c	kinesin family member 3C	NC_036794.1	17263906	17293699	29794	KIF3C	kinesin family member 3C [Source:HGNC Symbol;Acc:6321]	Uncharacterized protein [Source:UniProtKB/TrEMBL;Acc:E7F4J1]
gene14343	-1.37611	6.52611	-3.39541	0.00167837	0.0409842	-1.4344	LOC101481939	zc3h15	zinc finger CCCH-type containing 15	NC_036792.1	5644473	5652018	7546	ZC3H15	zinc finger CCCH-type containing 15 [Source:HGNC Symbol;Acc:29528]	zinc finger CCCH-type containing 15 [Source:ZFIN;Acc:ZDB-GENE-030131-6239]
gene13237	-2.21887	3.86523	-3.29327	0.00222143	0.0482414	-1.43497	LOC101467438	LOC101467438	G protein-coupled receptor kinase 5	NC_036791.1	11298450	11328234	29785	GRK6	G protein-coupled receptor kinase 6 [Source:HGNC Symbol;Acc:4545]	G protein-coupled receptor kinase 5 like [Source:ZFIN;Acc:ZDB-GENE-081105-95]
gene18717	-2.31744	4.02902	-3.29257	0.00222567	0.0482755	-1.43734	LOC101471636	LOC101471636	calreticulin	NC_036796.1	12517527	12523101	5575	CALR3	calreticulin 3 [Source:HGNC Symbol;Acc:20407]	calreticulin [Source:ZFIN;Acc:ZDB-GENE-000208-17]
gene20781	-3.16671	2.82611	-3.30257	0.00216576	0.0474905	-1.43821	LOC101467717	wdr35	WD repeat domain 35%2C transcript variant X1	NC_036798.1	12295948	12320113	24166	WDR35	WD repeat domain 35 [Source:HGNC Symbol;Acc:29250]	WD repeat domain 35 [Source:ZFIN;Acc:ZDB-GENE-060810-148]
gene3908	-2.19833	4.43317	-3.2949	0.0022116	0.0481777	-1.43854	LOC101484712	LOC101484712	delphilin%2C transcript variant X1	NC_036783.1	15313387	15344097	30711	GRID2IP	glutamate receptor, ionotropic, delta 2 (Grid2) interacting protein [Source:HGNC Symbol;Acc:18464]	glutamate receptor, ionotropic, delta 2 (Grid2) interacting protein, a [Source:ZFIN;Acc:ZDB-GENE-091113-42]
gene9493	2.43058	1.18378	3.28562	0.00226827	0.0486822	-1.43919	LOC101480232	LOC101480232	epidermal growth factor receptor kinase substrate 8-like protein 1	NC_036787.1	8317707	8327664	9958	EPS8L1	EPS8-like 1 [Source:HGNC Symbol;Acc:21295]	EPS8-like 1 [Source:HGNC Symbol;Acc:21295]
gene20042	-2.91174	4.13629	-3.29413	0.00221624	0.0481866	-1.44054	LOC101476942	LOC101476942	protein ABHD8	NC_036797.1	18363193	18369493	6301	ABHD8	abhydrolase domain containing 8 [Source:HGNC Symbol;Acc:23759]	abhydrolase domain containing 8 [Source:ZFIN;Acc:ZDB-GENE-080204-70]
gene7628	-2.2528	4.07232	-3.29014	0.00224046	0.0484217	-1.4432	LOC101487560	snapc5	small nuclear RNA activating complex polypeptide 5	NC_036786.1	13556504	13558504	2001	SNAPC5	small nuclear RNA activating complex, polypeptide 5, 19kDa [Source:HGNC Symbol;Acc:15484]	small nuclear RNA activating complex, polypeptide 5 [Source:ZFIN;Acc:ZDB-GENE-041111-50]
gene20831	-1.81111	5.83342	-3.34428	0.00193202	0.044527	-1.44669	LOC105941168	LOC105941168	uncharacterized LOC105941168	NC_036798.1	13953423	13958128	4706	NA	NA	NA
gene24098	1.31692	5.86316	3.40154	0.00165018	0.0407447	-1.44859	LOC105941043	LOC105941043	uncharacterized LOC105941043	NC_036801.1	8037796	8040949	3154	NA	NA	NA
gene12457	-1.57084	7.23199	-3.42348	0.00155295	0.0393531	-1.45389	LOC101469831	LOC101469831	tubulin beta chain%2C transcript variant X2	NC_036790.1	19617982	19622518	4537	TUBB	tubulin, beta class I [Source:HGNC Symbol;Acc:20778]	tubulin, beta 5 [Source:ZFIN;Acc:ZDB-GENE-031110-4]
gene16815	2.54133	1.22003	3.27919	0.00230837	0.0490677	-1.45405	LOC101481638	LOC101481638	sodium/bile acid cotransporter	NC_036794.1	15643368	15651419	8052	SLC10A1	solute carrier family 10 (sodium/bile acid cotransporter family), member 1 [Source:HGNC Symbol;Acc:10905]	solute carrier family 10 (sodium/bile acid cotransporter family), member 1 [Source:ZFIN;Acc:ZDB-GENE-041001-190]
gene12353	-1.41753	6.36748	-3.37619	0.00176975	0.0420735	-1.46006	LOC101473167	LOC101473167	uncharacterized LOC101473167	NC_036790.1	18136242	18147635	11394	SHISA7	shisa homolog 7 (Xenopus laevis) [Source:HGNC Symbol;Acc:35409]	shisa homolog 7 (Xenopus laevis) [Source:HGNC Symbol;Acc:35409]
gene3428	-2.15964	2.84446	-3.28422	0.0022769	0.0487774	-1.4675	LOC101484380	LOC101484380	coatomer subunit zeta-1%2C transcript variant X2	NC_036783.1	3993600	4009277	15678	COPZ2	coatomer protein complex, subunit zeta 2 [Source:HGNC Symbol;Acc:19356]	zeta2-cop [Source:ZFIN;Acc:ZDB-GENE-000406-5]
gene16653	-2.2396	3.4838	-3.27992	0.00230375	0.0490415	-1.47119	LOC101463877	wasf1	WAS protein family member 1%2C transcript variant X1	NC_036794.1	10282384	10349199	66816	WASF1	WAS protein family, member 1 [Source:HGNC Symbol;Acc:12732]	WAS protein family, member 1 [Source:HGNC Symbol;Acc:12732]
gene15456	-2.20751	4.73333	-3.28566	0.00226802	0.0486822	-1.47174	LOC101487321	LOC101487321	galactosylgalactosylxylosylprotein 3-beta-glucuronosyltransferase 1%2C transcript variant X1	NC_036793.1	14364049	14453310	89262	B3GAT1	beta-1,3-glucuronyltransferase 1 (glucuronosyltransferase P) [Source:HGNC Symbol;Acc:921]	beta-1,3-glucuronyltransferase 1 (glucuronosyltransferase P) [Source:ZFIN;Acc:ZDB-GENE-050419-21]
gene3552	-1.70496	5.52311	-3.31693	0.00208239	0.0463618	-1.47384	LOC101470166	LOC101470166	probable ATP-dependent RNA helicase DDX5%2C transcript variant X1	NC_036783.1	6990607	6995996	5390	DDX5	DEAD (Asp-Glu-Ala-Asp) box helicase 5 [Source:HGNC Symbol;Acc:2746]	DEAD (Asp-Glu-Ala-Asp) box polypeptide 5 [Source:ZFIN;Acc:ZDB-GENE-030131-925]
gene7876	-1.64254	6.09126	-3.34605	0.00192269	0.0445204	-1.47606	LOC101468062	LOC101468062	cellular retinoic acid-binding protein 1	NC_036786.1	20187776	20208564	20789	CRABP1	cellular retinoic acid binding protein 1 [Source:HGNC Symbol;Acc:2338]	cellular retinoic acid binding protein 1b [Source:ZFIN;Acc:ZDB-GENE-040624-3]
gene6776	-2.3693	4.2642	-3.27696	0.00232241	0.0491927	-1.47647	LOC101467220	dcaf15	DDB1 and CUL4 associated factor 15	NC_036785.1	29202271	29211053	8783	DCAF15	DDB1 and CUL4 associated factor 15 [Source:HGNC Symbol;Acc:25095]	DDB1 and CUL4 associated factor 15 [Source:ZFIN;Acc:ZDB-GENE-030131-2374]
gene16725	-2.54062	3.46004	-3.27981	0.00230442	0.0490415	-1.47676	LOC101478173	ppp4r3a	protein phosphatase 4 regulatory subunit 3A%2C transcript variant X1	NC_036794.1	12352112	12362763	10652	SMEK1	SMEK homolog 1, suppressor of mek1 (Dictyostelium) [Source:HGNC Symbol;Acc:20219]	SMEK homolog 1, suppressor of mek1 (Dictyostelium) [Source:ZFIN;Acc:ZDB-GENE-030131-3958]
gene22685	-2.00655	5.2176	-3.2982	0.00219178	0.0479361	-1.47849	LOC101464960	LOC101464960	gamma-enolase	NC_036800.1	3136137	3158869	22733	ENO2	enolase 2 (gamma, neuronal) [Source:HGNC Symbol;Acc:3353]	enolase 2 [Source:ZFIN;Acc:ZDB-GENE-040704-27]
gene17518	-2.27738	4.00009	-3.27392	0.00234169	0.0494849	-1.48124	LOC101477896	itgav	integrin subunit alpha V	NC_036795.1	5786772	5826081	39310	ITGAV	integrin, alpha V [Source:HGNC Symbol;Acc:6150]	integrin, alpha V [Source:ZFIN;Acc:ZDB-GENE-060616-382]
gene17913	-2.54112	2.5278	-3.2783	0.00231392	0.049104	-1.48442	LOC101468014	agps	alkylglycerone phosphate synthase	NC_036795.1	17217873	17246584	28712	AGPS	alkylglycerone phosphate synthase [Source:HGNC Symbol;Acc:327]	alkylglycerone phosphate synthase [Source:ZFIN;Acc:ZDB-GENE-031118-14]
gene6847	-2.21035	4.62704	-3.27805	0.00231551	0.049104	-1.48555	LOC101467930	LOC101467930	centrosomal protein of 170 kDa%2C transcript variant X2	NC_036785.1	30261246	30276568	15323	CEP170	centrosomal protein 170kDa [Source:HGNC Symbol;Acc:28920]	centrosomal protein 170b [Source:ZFIN;Acc:ZDB-GENE-050309-106]
gene17694	-2.07424	2.22161	-3.27232	0.00235189	0.0496424	-1.48739	LOC101472546	LOC101472546	mid1-interacting protein 1-B	NC_036795.1	11828036	11830044	2009	MID1IP1	MID1 interacting protein 1 [Source:HGNC Symbol;Acc:20715]	MID1 interacting protein 1a [Source:ZFIN;Acc:ZDB-GENE-990415-81]
gene1036	1.12841	6.90683	3.43756	0.00149353	0.0384952	-1.48739	LOC112435403	LOC112435403	piggyBac transposable element-derived protein 4-like	NC_036781.1	1283550	1286058	2509	PGBD4	piggyBac transposable element derived 4 [Source:HGNC Symbol;Acc:19401]	Uncharacterized protein [Source:UniProtKB/TrEMBL;Acc:E7EXJ9]
gene3050	1.9803	4.22885	3.30128	0.0021734	0.0475989	-1.49231	LOC101469175	LOC101469175	PC-esterase domain-containing protein 1A%2C transcript variant X1	NC_036782.1	29151856	29156771	4916	PCED1A	PC-esterase domain containing 1A [Source:HGNC Symbol;Acc:16212]	family with sequence similarity 113 [Source:ZFIN;Acc:ZDB-GENE-041212-23]
gene2131	-2.23844	3.87245	-3.26769	0.00238172	0.0499802	-1.49549	LOC101483482	LOC101483482	serrate RNA effector molecule homolog	NC_036782.1	4852090	4862582	10493	SRRT	serrate RNA effector molecule homolog (Arabidopsis) [Source:HGNC Symbol;Acc:24101]	serrate RNA effector molecule homolog (Arabidopsis) [Source:ZFIN;Acc:ZDB-GENE-020419-13]
gene25558	-2.07598	2.62306	-3.27023	0.0023653	0.0498092	-1.49937	LOC101481402	zdhhc22	zinc finger DHHC-type containing 22	NW_020192340.1	323604	327599	3996	ZDHHC22	zinc finger, DHHC-type containing 22 [Source:HGNC Symbol;Acc:20106]	Uncharacterized protein [Source:UniProtKB/TrEMBL;Acc:E7EY29]
gene22105	-2.27573	4.55862	-3.26933	0.00237113	0.04983	-1.50209	LOC101479868	LOC101479868	uncharacterized LOC101479868%2C transcript variant X1	NC_036799.1	19011392	19043087	31696	DIDO1	death inducer-obliterator 1 [Source:HGNC Symbol;Acc:2680]	NA
gene22968	-2.19677	4.59099	-3.26922	0.00237181	0.04983	-1.50483	LOC101472534	LOC101472534	casein kinase II subunit beta%2C transcript variant X2	NC_036800.1	10788276	10797799	9524	CSNK2B	casein kinase 2, beta polypeptide [Source:HGNC Symbol;Acc:2460]	casein kinase 2 beta [Source:ZFIN;Acc:ZDB-GENE-990415-29]
gene13219	-2.13266	4.77341	-3.27052	0.00236345	0.0498092	-1.50903	LOC101486368	sf3a1	splicing factor 3a subunit 1	NC_036791.1	11027928	11033985	6058	SF3A1	splicing factor 3a, subunit 1, 120kDa [Source:HGNC Symbol;Acc:10765]	splicing factor 3a, subunit 1 [Source:ZFIN;Acc:ZDB-GENE-030616-156]
gene10019	1.43011	6.01118	3.38627	0.00172123	0.0414654	-1.5093	LOC101483734	LOC101483734	antigen peptide transporter 2%2C transcript variant X1	NC_036787.1	21067770	21078295	10526	E7ENX8	Uncharacterized protein [Source:UniProtKB/TrEMBL;Acc:E7ENX8]	Uncharacterized protein [Source:UniProtKB/TrEMBL;Acc:E7F2I0]
gene4120	-1.47672	6.03208	-3.33307	0.00199236	0.0453639	-1.51212	LOC101469472	LOC101469472	cAMP-specific 3'%2C5'-cyclic phosphodiesterase 4C	NC_036783.1	19751636	19800526	48891	PDE4A	phosphodiesterase 4A, cAMP-specific [Source:HGNC Symbol;Acc:8780]	Uncharacterized protein [Source:UniProtKB/TrEMBL;Acc:E7FAS0]
gene14074	1.29359	5.81361	3.37182	0.00179116	0.042249	-1.51697	LOC101478663	tti2	TELO2 interacting protein 2	NC_036791.1	33395604	33401855	6252	TTI2	TELO2 interacting protein 2 [Source:HGNC Symbol;Acc:26262]	TELO2 interacting protein 2 [Source:ZFIN;Acc:ZDB-GENE-110411-25]
gene3390	-1.46335	6.07217	-3.33265	0.00199468	0.0453639	-1.51987	LOC101486956	caskin1	CASK interacting protein 1%2C transcript variant X1	NC_036783.1	2475464	2597239	121776	CASKIN1	CASK interacting protein 1 [Source:HGNC Symbol;Acc:20879]	CASK interacting protein 1 [Source:HGNC Symbol;Acc:20879]
gene10199	-2.31481	5.41147	-3.27578	0.00232986	0.0492926	-1.53403	LOC101472402	LOC101472402	ATP-dependent 6-phosphofructokinase%2C platelet type%2C transcript variant X2	NC_036788.1	4097097	4118944	21848	PFKP	phosphofructokinase, platelet [Source:HGNC Symbol;Acc:8878]	phosphofructokinase, platelet a [Source:ZFIN;Acc:ZDB-GENE-091112-22]
gene24219	1.67674	4.49846	3.28759	0.00225609	0.0485852	-1.55524	LOC101476143	LOC101476143	uncharacterized LOC101476143%2C transcript variant X1	NC_036801.1	11121869	11123944	2076	NA	NA	oogenesis-related gene [Source:ZFIN;Acc:ZDB-GENE-050208-584]
gene37	1.44961	5.21688	3.32482	0.0020379	0.0459678	-1.55717	LOC101482763	ccne1	cyclin E1%2C transcript variant X3	NC_036780.1	2686135	2691728	5594	CCNE1	cyclin E1 [Source:HGNC Symbol;Acc:1589]	cyclin E1 [Source:ZFIN;Acc:ZDB-GENE-980526-168]
gene26577	1.30836	5.89488	3.36098	0.00184542	0.0433589	-1.55741	LOC101477098	top3a	DNA topoisomerase III alpha%2C transcript variant X1	NW_020192397.1	425994	444379	18386	TOP3A	topoisomerase (DNA) III alpha [Source:HGNC Symbol;Acc:11992]	topoisomerase (DNA) III alpha [Source:ZFIN;Acc:ZDB-GENE-071212-2]
gene10634	-1.68213	5.53271	-3.28233	0.00228867	0.0489369	-1.56357	LOC101466139	eif1ax	eukaryotic translation initiation factor 1A%2C X-linked	NC_036788.1	20271127	20277854	6728	EIF1AX	eukaryotic translation initiation factor 1A, X-linked [Source:HGNC Symbol;Acc:3250]	eukaryotic translation initiation factor 1A, X-linked, b [Source:ZFIN;Acc:ZDB-GENE-030131-1319]
gene21509	-1.76011	5.86464	-3.29464	0.00221317	0.0481777	-1.56654	LOC101475677	huwe1	HECT%2C UBA and WWE domain containing 1%2C E3 ubiquitin protein ligase%2C transcript variant X2	NC_036799.1	2956045	3007562	51518	HUWE1	HECT, UBA and WWE domain containing 1, E3 ubiquitin protein ligase [Source:HGNC Symbol;Acc:30892]	HECT, UBA and WWE domain containing 1 [Source:ZFIN;Acc:ZDB-GENE-081104-387]
gene10986	-1.50782	6.265	-3.32437	0.00204041	0.0459678	-1.57041	LOC101487591	LOC101487591	misshapen-like kinase 1%2C transcript variant X1	NC_036789.1	11287007	11320671	33665	MINK1	misshapen-like kinase 1 [Source:HGNC Symbol;Acc:17565]	misshapen-like kinase 1 [Source:ZFIN;Acc:ZDB-GENE-060526-45]
gene14354	-1.22381	8.69483	-3.45594	0.0014192	0.0374679	-1.57758	LOC101479249	LOC101479249	beta-soluble NSF attachment protein	NC_036792.1	5754426	5767125	12700	NAPB	N-ethylmaleimide-sensitive factor attachment protein, beta [Source:HGNC Symbol;Acc:15751]	N-ethylmaleimide-sensitive factor attachment protein, beta [Source:HGNC Symbol;Acc:15751]
gene16311	-1.01048	7.87732	-3.41793	0.00157701	0.0396293	-1.58155	LOC101476080	hnrnpu	heterogeneous nuclear ribonucleoprotein U	NC_036794.1	225516	234903	9388	HNRNPU	heterogeneous nuclear ribonucleoprotein U (scaffold attachment factor A) [Source:HGNC Symbol;Acc:5048]	heterogeneous nuclear ribonucleoprotein Ub [Source:ZFIN;Acc:ZDB-GENE-030131-6422]
gene21148	-1.53976	5.71365	-3.28396	0.00227851	0.0487774	-1.58849	LOC101478154	rcan3	RCAN family member 3%2C transcript variant X1	NC_036798.1	21141281	21191450	50170	RCAN3	RCAN family member 3 [Source:HGNC Symbol;Acc:3042]	regulator of calcineurin family member 3 [Source:ZFIN;Acc:ZDB-GENE-040718-445]
gene23380	1.3646	5.90674	3.34722	0.00191649	0.0445204	-1.59457	LOC101479038	LOC101479038	protein FAM221A%2C transcript variant X1	NC_036800.1	20078589	20081330	2742	FAM221A	family with sequence similarity 221, member A [Source:HGNC Symbol;Acc:27977]	family with sequence similarity 221, member A [Source:ZFIN;Acc:ZDB-GENE-050320-27]
gene3781	-1.53832	6.45881	-3.32091	0.00205982	0.0461176	-1.59834	LOC101484681	LOC101484681	vesicular glutamate transporter 1	NC_036783.1	12416608	12431295	14688	SLC17A7	solute carrier family 17 (sodium-dependent inorganic phosphate cotransporter), member 7 [Source:HGNC Symbol;Acc:16704]	solute carrier family 17 (sodium-dependent inorganic phosphate cotransporter), member 7 [Source:ZFIN;Acc:ZDB-GENE-050105-5]
gene10534	1.31583	5.92744	3.34525	0.00192688	0.0445204	-1.60074	LOC101474191	LOC101474191	guanine nucleotide-binding protein G(olf) subunit alpha-like	NC_036788.1	17853242	17865489	12248	GNAL	guanine nucleotide binding protein (G protein), alpha activating activity polypeptide, olfactory type [Source:HGNC Symbol;Acc:4388]	guanine nucleotide binding protein (G protein), alpha activating activity polypeptide, olfactory type [Source:ZFIN;Acc:ZDB-GENE-041114-26]
gene5309	-1.46242	6.10757	-3.30256	0.00216583	0.0474905	-1.60202	LOC101483348	cacna2d2	calcium voltage-gated channel auxiliary subunit alpha2delta 2%2C transcript variant X1	NC_036784.1	20644072	20829145	185074	CACNA2D2	calcium channel, voltage-dependent, alpha 2/delta subunit 2 [Source:HGNC Symbol;Acc:1400]	calcium channel, voltage-dependent, alpha 2/delta subunit 2 [Source:HGNC Symbol;Acc:1400]
gene15345	-1.55918	5.92842	-3.2907	0.00223705	0.0484061	-1.60231	LOC101481476	pde2a	phosphodiesterase 2A%2C transcript variant X1	NC_036793.1	9890375	10076129	185755	PDE2A	phosphodiesterase 2A, cGMP-stimulated [Source:HGNC Symbol;Acc:8777]	phosphodiesterase 10A [Source:ZFIN;Acc:ZDB-GENE-040426-1115]
gene19711	1.08615	7.05869	3.39399	0.00168492	0.0409842	-1.61767	LOC101480595	LOC101480595	rho guanine nucleotide exchange factor 18%2C transcript variant X2	NC_036797.1	9934542	9960285	25744	ARHGEF18	Rho/Rac guanine nucleotide exchange factor (GEF) 18 [Source:HGNC Symbol;Acc:17090]	rho/rac guanine nucleotide exchange factor (GEF) 18a [Source:ZFIN;Acc:ZDB-GENE-040516-14]
gene14446	-1.08624	7.86614	-3.40096	0.00165283	0.0407447	-1.62053	LOC101477366	zbtb18	zinc finger and BTB domain containing 18%2C transcript variant X3	NC_036792.1	10236843	10247232	10390	ZBTB18	zinc finger and BTB domain containing 18 [Source:HGNC Symbol;Acc:13030]	zinc finger and BTB domain containing 18 [Source:ZFIN;Acc:ZDB-GENE-050419-73]
gene5435	-1.45682	6.04342	-3.28555	0.00226867	0.0486822	-1.63745	LOC101484772	rims4	regulating synaptic membrane exocytosis 4%2C transcript variant X1	NC_036784.1	23573225	23626111	52887	RIMS1	regulating synaptic membrane exocytosis 1 [Source:HGNC Symbol;Acc:17282]	regulating synaptic membrane exocytosis 1a [Source:ZFIN;Acc:ZDB-GENE-090312-135]
gene24746	-1.36592	6.78284	-3.32302	0.00204801	0.0460241	-1.6579	LOC101480563	LOC101480563	sodium channel protein type 2 subunit alpha%2C transcript variant X2	NC_036801.1	29159949	29200467	40519	SCN2A	sodium channel, voltage-gated, type II, alpha subunit [Source:HGNC Symbol;Acc:10588]	sodium channel, voltage-gated, type I like, alpha b [Source:ZFIN;Acc:ZDB-GENE-060906-1]
gene5242	-1.24743	6.78365	-3.29693	0.00219934	0.0479923	-1.73318	LOC101485709	syn2	synapsin II	NC_036784.1	19269280	19361784	92505	SYN1	synapsin I [Source:HGNC Symbol;Acc:11494]	Uncharacterized protein [Source:UniProtKB/TrEMBL;Acc:E7F7I9]
gene5283	-1.05804	11.3895	-3.51626	0.00119938	0.0342191	-1.76841	LOC101475135	LOC101475135	1-phosphatidylinositol 4%2C5-bisphosphate phosphodiesterase eta-2	NC_036784.1	20434123	20445549	11427	PLCH2	phospholipase C, eta 2 [Source:HGNC Symbol;Acc:29037]	phospholipase C, eta 2 [Source:HGNC Symbol;Acc:29037]
gene12127	-1.08815	7.43213	-3.28118	0.00229583	0.0489844	-1.87087	LOC101469515	oxr1	oxidation resistance 1%2C transcript variant X1	NC_036790.1	14050051	14233460	183410	OXR1	oxidation resistance 1 [Source:HGNC Symbol;Acc:15822]	oxidation resistance 1 [Source:HGNC Symbol;Acc:15822]

## Sheet: Analysis Gene Set
Symbol	Full Name	Aliases	GeneCards URL
AATK	Apoptosis Associated Tyrosine Kinase	AATYK1, PPP1R77, KIAA0641, AATYK, LMR1, LMTK1, p35BP	http://www.genecards.org/cgi-bin/carddisp.pl?gene=AATK
ABAT	4-Aminobutyrate Aminotransferase	NPD009, L-AIBAT, GABA-T, GABAT, GABA-AT	http://www.genecards.org/cgi-bin/carddisp.pl?gene=ABAT
ABCC6	ATP Binding Cassette Subfamily C Member 6	ABC34, EST349056, GACI2, MLP1, MOATE, PXE1, URG7, PXE, ARA, MOAT-E, MRP6	http://www.genecards.org/cgi-bin/carddisp.pl?gene=ABCC6
ABHD8	Abhydrolase Domain Containing 8		http://www.genecards.org/cgi-bin/carddisp.pl?gene=ABHD8
ACADVL	Acyl-CoA Dehydrogenase Very Long Chain	ACAD6, LCACD, VLCAD	http://www.genecards.org/cgi-bin/carddisp.pl?gene=ACADVL
ACAP3	ArfGAP With Coiled-Coil, Ankyrin Repeat And PH Domains 3	centaurin-beta-5, cnt-b5, CENTB5, KIAA1716	http://www.genecards.org/cgi-bin/carddisp.pl?gene=ACAP3
ACSBG1	Acyl-CoA Synthetase Bubblegum Family Member 1	BG, BG1, GR-LACS, bubblegum, lipidosin, KIAA0631, hBG1, hsBG, hsBGM, BGM, LPD	http://www.genecards.org/cgi-bin/carddisp.pl?gene=ACSBG1
ACTB	Actin Beta	BRWS1, I(2)-actin, PS1TP5BP1, Beta-actin, Î²-actin	http://www.genecards.org/cgi-bin/carddisp.pl?gene=ACTB
ACVRL1	Activin A Receptor Like Type 1	HHT, HHT2, ORW2, ACVRLK1, ALK-1, ALK1, SKR3, TSR-I	http://www.genecards.org/cgi-bin/carddisp.pl?gene=ACVRL1
ADAM23	ADAM Metallopeptidase Domain 23	MDC-3, MDC3	http://www.genecards.org/cgi-bin/carddisp.pl?gene=ADAM23
ADSL	Adenylosuccinate Lyase	ASASE, adenylosuccinase, AMPS, ASL	http://www.genecards.org/cgi-bin/carddisp.pl?gene=ADSL
AGAP2	ArfGAP With GTPase Domain, Ankyrin Repeat And PH Domain 2	cnt-g1, CENTG1, AGAP-2, Centaurin-gamma-1, KIAA0167, GGAP2, PIKE	http://www.genecards.org/cgi-bin/carddisp.pl?gene=AGAP2
AGPS	Alkylglycerone Phosphate Synthase	ADAP-S, ADAS, ADHAPS, ADPS, ALDHPSY, RCDP3	http://www.genecards.org/cgi-bin/carddisp.pl?gene=AGPS
AHCTF1	AT-Hook Containing Transcription Factor 1	MSTP108, ELYS, MST108, TMBS62	http://www.genecards.org/cgi-bin/carddisp.pl?gene=AHCTF1
AIMP2	Aminoacyl TRNA Synthetase Complex Interacting Multifunctional Protein 2	JTV-1, P38, JTV1	http://www.genecards.org/cgi-bin/carddisp.pl?gene=AIMP2
AK1	Adenylate Kinase 1	HTL-S-58j, myokinase	http://www.genecards.org/cgi-bin/carddisp.pl?gene=AK1
AKAP11	A-Kinase Anchoring Protein 11	hAKAP220, AKAP-11, AKAP220, PRKA11, KIAA0629, PPP1R44	http://www.genecards.org/cgi-bin/carddisp.pl?gene=AKAP11
AKT1S1	AKT1 Substrate 1	PRAS40, Lobe	http://www.genecards.org/cgi-bin/carddisp.pl?gene=AKT1S1
ALDH1A2	Aldehyde Dehydrogenase 1 Family Member A2	RalDH2, RALDH(II), RALDH2-T	http://www.genecards.org/cgi-bin/carddisp.pl?gene=ALDH1A2
ALDH9A1	Aldehyde Dehydrogenase 9 Family Member A1	E3, ALDH4, ALDH7, ALDH9, TMABADH	http://www.genecards.org/cgi-bin/carddisp.pl?gene=ALDH9A1
AMFR	Autocrine Motility Factor Receptor	RNF45, gp78	http://www.genecards.org/cgi-bin/carddisp.pl?gene=AMFR
ANKLE1	Ankyrin Repeat And LEM Domain Containing 1	LEMD6, ANKRD41, LEM3	http://www.genecards.org/cgi-bin/carddisp.pl?gene=ANKLE1
ANKRD46	Ankyrin Repeat Domain 46	GENX-115279, ANK-S	http://www.genecards.org/cgi-bin/carddisp.pl?gene=ANKRD46
ANKS1B	Ankyrin Repeat And Sterile Alpha Motif Domain Containing 1B	AIDA, ANKS2, EB1, cajalin-2, AIDA-1, EB-1	http://www.genecards.org/cgi-bin/carddisp.pl?gene=ANKS1B
ANO1	Anoctamin 1	anoctamin-1, ORAOV2, TMEM16A, DOG1, TAOS2	http://www.genecards.org/cgi-bin/carddisp.pl?gene=ANO1
ANXA13	Annexin A13	annexin-13, ANX13, ISA	http://www.genecards.org/cgi-bin/carddisp.pl?gene=ANXA13
AP1M1	Adaptor Related Protein Complex 1 Subunit Mu 1	mu1A-adaptin, CLTNM, CLAPM2, MU-1A, AP47	http://www.genecards.org/cgi-bin/carddisp.pl?gene=AP1M1
AP2S1	Adaptor Related Protein Complex 2 Subunit Sigma 1	sigma2-adaptin, HHC3, CLAPS2, AP17, FBH3, FBHOk	http://www.genecards.org/cgi-bin/carddisp.pl?gene=AP2S1
APLP1	Amyloid Beta Precursor Like Protein 1	APLP-1, APLP	http://www.genecards.org/cgi-bin/carddisp.pl?gene=APLP1
APLP2	Amyloid Beta Precursor Like Protein 2	APPL2, APLP-2, APPH, CDEBP	http://www.genecards.org/cgi-bin/carddisp.pl?gene=APLP2
APP	Amyloid Beta Precursor Protein	AAA, ABETA, CTFgamma, PN2, preA4, AD1, A4, ABPP, APPI, CVAP, PN-II	http://www.genecards.org/cgi-bin/carddisp.pl?gene=APP
ARF3	ADP Ribosylation Factor 3		http://www.genecards.org/cgi-bin/carddisp.pl?gene=ARF3
ARF6	ADP Ribosylation Factor 6		http://www.genecards.org/cgi-bin/carddisp.pl?gene=ARF6
ARHGAP21	Rho GTPase Activating Protein 21	KIAA1424, ARHGAP10	http://www.genecards.org/cgi-bin/carddisp.pl?gene=ARHGAP21
ARHGAP35	Rho GTPase Activating Protein 35	GRLF1, GRF1, KIAA1722, p190-A, p190ARHOGAP, GRF-1, P190A, p190RhoGAP	http://www.genecards.org/cgi-bin/carddisp.pl?gene=ARHGAP35
ARHGAP4	Rho GTPase Activating Protein 4	C1, RhoGAP4, SrGAP4, KIAA0131, RGC1, p115	http://www.genecards.org/cgi-bin/carddisp.pl?gene=ARHGAP4
ARHGEF11	Rho Guanine Nucleotide Exchange Factor 11	GTRAP48, PDZ-RHOGEF, KIAA0380	http://www.genecards.org/cgi-bin/carddisp.pl?gene=ARHGEF11
ARHGEF18	Rho/Rac Guanine Nucleotide Exchange Factor 18	P114-RhoGEF, RP78, KIAA0521, p114-Rho-GEF, SA-RhoGEF, p114RhoGEF	http://www.genecards.org/cgi-bin/carddisp.pl?gene=ARHGEF18
ARHGEF33	Rho Guanine Nucleotide Exchange Factor 33		http://www.genecards.org/cgi-bin/carddisp.pl?gene=ARHGEF33
ARL17B	ADP Ribosylation Factor Like GTPase 17B	ARL17, ARF1P2, ARL17P1, ARL17A	http://www.genecards.org/cgi-bin/carddisp.pl?gene=ARL17B
ARL8B	ADP Ribosylation Factor Like GTPase 8B	Gie1, ARL10C	http://www.genecards.org/cgi-bin/carddisp.pl?gene=ARL8B
ARPC2	Actin Related Protein 2/3 Complex Subunit 2	p34-ARC, ARC34, PNAS-139, PRO2446	http://www.genecards.org/cgi-bin/carddisp.pl?gene=ARPC2
ARPP19	CAMP Regulated Phosphoprotein 19	ARPP-16, ARPP16, ENSAL, ARPP-19	http://www.genecards.org/cgi-bin/carddisp.pl?gene=ARPP19
ASPHD2	Aspartate Beta-Hydroxylase Domain Containing 2		http://www.genecards.org/cgi-bin/carddisp.pl?gene=ASPHD2
ATF4	Activating Transcription Factor 4	TAXREB67, TXREB, CREB-2, CREB2	http://www.genecards.org/cgi-bin/carddisp.pl?gene=ATF4
ATP11C	ATPase Phospholipid Transporting 11C	ATPIG, ATPIQ	http://www.genecards.org/cgi-bin/carddisp.pl?gene=ATP11C
ATP1A1	ATPase Na+/K+ Transporting Subunit Alpha 1		http://www.genecards.org/cgi-bin/carddisp.pl?gene=ATP1A1
ATP1A3	ATPase Na+/K+ Transporting Subunit Alpha 3	AHC2, ATP1A1, CAPOS, RDP, DYT12	http://www.genecards.org/cgi-bin/carddisp.pl?gene=ATP1A3
ATP1B2	ATPase Na+/K+ Transporting Subunit Beta 2	AMOG	http://www.genecards.org/cgi-bin/carddisp.pl?gene=ATP1B2
ATP1B3	ATPase Na+/K+ Transporting Subunit Beta 3	ATPB-3, CD298	http://www.genecards.org/cgi-bin/carddisp.pl?gene=ATP1B3
ATP2A2	ATPase Sarcoplasmic/Endoplasmic Reticulum Ca2+ Transporting 2	DD, DAR, ATP2B, SERCA2	http://www.genecards.org/cgi-bin/carddisp.pl?gene=ATP2A2
ATP2B2	ATPase Plasma Membrane Ca2+ Transporting 2	PMCA2a, PMCA2i, PMCA2	http://www.genecards.org/cgi-bin/carddisp.pl?gene=ATP2B2
ATP5PB	ATP Synthase Peripheral Stalk-Membrane Subunit B	PIG47, ATP5F1	http://www.genecards.org/cgi-bin/carddisp.pl?gene=ATP5PB
ATP6V0A1	ATPase H+ Transporting V0 Subunit A1	Stv1, Vph1, a1, ATP6N1, ATP6N1A, VPP1	http://www.genecards.org/cgi-bin/carddisp.pl?gene=ATP6V0A1
ATP6V0A2	ATPase H+ Transporting V0 Subunit A2	A2, A2V-ATPase, ARCL, ARCL2A, ATP6A2, ATP6N1D, J6B7, RTF, STV1, TJ6M, TJ6S, VPH1, WSS, TJ6	http://www.genecards.org/cgi-bin/carddisp.pl?gene=ATP6V0A2
ATP6V0C	ATPase H+ Transporting V0 Subunit C	VATL, VPPC, Vma3, ATPL, ATP6C, ATP6L	http://www.genecards.org/cgi-bin/carddisp.pl?gene=ATP6V0C
ATP6V1A	ATPase H+ Transporting V1 Subunit A	ARCL2D, HO68, VA68, Vma1, ATP6A1, ATP6V1A1, VPP2	http://www.genecards.org/cgi-bin/carddisp.pl?gene=ATP6V1A
ATP6V1D	ATPase H+ Transporting V1 Subunit D	VATD, ATP6M, VMA8	http://www.genecards.org/cgi-bin/carddisp.pl?gene=ATP6V1D
ATXN1	Ataxin 1	D6S504E, ataxin-1, SCA1, ATX1	http://www.genecards.org/cgi-bin/carddisp.pl?gene=ATXN1
ATXN2L	Ataxin 2 Like	A2D, A2LG, A2LP, A2RP	http://www.genecards.org/cgi-bin/carddisp.pl?gene=ATXN2L
B3GAT1	Beta-1,3-Glucuronyltransferase 1	GLCATP, LEU7, GlcAT-P, GlcUAT-P, NK1, CD57, NK-1, HNK1, GLCUATP	http://www.genecards.org/cgi-bin/carddisp.pl?gene=B3GAT1
B4GALT2	Beta-1,4-Galactosyltransferase 2	beta-4-GalT2, B4Gal-T3, Beta4Gal-T2, b4Gal-T2	http://www.genecards.org/cgi-bin/carddisp.pl?gene=B4GALT2
B4GALT5	Beta-1,4-Galactosyltransferase 5	B4Gal-T5, BETA4-GALT-IV, beta4Gal-T5, beta4GalT-V, gt-V	http://www.genecards.org/cgi-bin/carddisp.pl?gene=B4GALT5
BACE1	Beta-Secretase 1	ASP2, KIAA1149, Memapsin-2, BACE, HSPC104	http://www.genecards.org/cgi-bin/carddisp.pl?gene=BACE1
BAP1	BRCA1 Associated Protein 1	HUCEP-13, UCHL2, hucep-6, KIAA0272	http://www.genecards.org/cgi-bin/carddisp.pl?gene=BAP1
BAZ2B	Bromodomain Adjacent To Zinc Finger Domain 2B	WALp4, KIAA1476, hWALp4	http://www.genecards.org/cgi-bin/carddisp.pl?gene=BAZ2B
BDH2	3-Hydroxybutyrate Dehydrogenase 2	PRO20933, EFA6R, UNQ6308, UCPA-OR, DHRS6, SDR15C1	http://www.genecards.org/cgi-bin/carddisp.pl?gene=BDH2
BHMT	Betaine--Homocysteine S-Methyltransferase	HEL-S-61p, BHMT1	http://www.genecards.org/cgi-bin/carddisp.pl?gene=BHMT
BIN1	Bridging Integrator 1	AMPHL, AMPH2, CNM2, SH3P9	http://www.genecards.org/cgi-bin/carddisp.pl?gene=BIN1
BNIP3L	BCL2 Interacting Protein 3 Like	BNIP3a, NIP3L, NIX, BNIP3H	http://www.genecards.org/cgi-bin/carddisp.pl?gene=BNIP3L
BRINP1	BMP/Retinoic Acid Inducible Neural Specific 1	DBC1, DBCCR1, FAM5A	http://www.genecards.org/cgi-bin/carddisp.pl?gene=BRINP1
BRMS1	BRMS1, Transcriptional Repressor And Anoikis Regulator		http://www.genecards.org/cgi-bin/carddisp.pl?gene=BRMS1
BSDC1	BSD Domain Containing 1		http://www.genecards.org/cgi-bin/carddisp.pl?gene=BSDC1
BTBD9	BTB Domain Containing 9	dJ322I12.1, KIAA1880	http://www.genecards.org/cgi-bin/carddisp.pl?gene=BTBD9
BTG3	BTG Anti-Proliferation Factor 3	APRO4, TOB55, ANA, TOB5, ANA/BTG3, TOFA	http://www.genecards.org/cgi-bin/carddisp.pl?gene=BTG3
C16orf45	Chromosome 16 Open Reading Frame 45	MINP	http://www.genecards.org/cgi-bin/carddisp.pl?gene=C16orf45
C16orf70	Chromosome 16 Open Reading Frame 70	lin-10, LIN10, C16orf6	http://www.genecards.org/cgi-bin/carddisp.pl?gene=C16orf70
C19orf24	Chromosome 19 Open Reading Frame 24		http://www.genecards.org/cgi-bin/carddisp.pl?gene=C19orf24
C1QBP	Complement C1q Binding Protein	COXPD33, SF2p32, gC1Q-R, gC1qR, p32, HABP1, C1qBP, GC1QBP, p33	http://www.genecards.org/cgi-bin/carddisp.pl?gene=C1QBP
C1QL4	Complement C1q Like 4	C1QTNF11, CTRP11	http://www.genecards.org/cgi-bin/carddisp.pl?gene=C1QL4
C20orf194	Chromosome 20 Open Reading Frame 194		http://www.genecards.org/cgi-bin/carddisp.pl?gene=C20orf194
C2CD5	C2 Calcium Dependent Domain Containing 5	KIAA0528, CDP138	http://www.genecards.org/cgi-bin/carddisp.pl?gene=C2CD5
C5orf51	Chromosome 5 Open Reading Frame 51		http://www.genecards.org/cgi-bin/carddisp.pl?gene=C5orf51
C6orf106	Chromosome 6 Open Reading Frame 106	FP852, dJ391O22.4	http://www.genecards.org/cgi-bin/carddisp.pl?gene=C6orf106
C7orf57	Chromosome 7 Open Reading Frame 57		http://www.genecards.org/cgi-bin/carddisp.pl?gene=C7orf57
CACNA1H	Calcium Voltage-Gated Channel Subunit Alpha1 H	CACNA1HB, Cav3.2, ECA6, EIG6, HALD4	http://www.genecards.org/cgi-bin/carddisp.pl?gene=CACNA1H
CACNA2D2	Calcium Voltage-Gated Channel Auxiliary Subunit Alpha2delta 2	CACNA2D, KIAA0558	http://www.genecards.org/cgi-bin/carddisp.pl?gene=CACNA2D2
CACYBP	Calcyclin Binding Protein	GIG5, PNAS-107, CacyBP, S100A6BP, SIP, hCacyBP	http://www.genecards.org/cgi-bin/carddisp.pl?gene=CACYBP
CALB2	Calbindin 2	CAL2, calretinin, CAB29, CR	http://www.genecards.org/cgi-bin/carddisp.pl?gene=CALB2
CALM2	Calmodulin 2	CAMII, LQT15, PHKD, PHKD2, caM, calmodulin-2, CAM2, CAMB	http://www.genecards.org/cgi-bin/carddisp.pl?gene=CALM2
CALM3	Calmodulin 3	CaM, CaMIII, HEL-S-72, PHKD, PHKD3, calmodulin-3, CALML2, CAM3, CAMC	http://www.genecards.org/cgi-bin/carddisp.pl?gene=CALM3
CALR3	Calreticulin 3	CMH19, CT93, calreticulin-2, calreticulin-3, calsperin, CRT2	http://www.genecards.org/cgi-bin/carddisp.pl?gene=CALR3
CALU	Calumenin	calumenin, Crocalbin	http://www.genecards.org/cgi-bin/carddisp.pl?gene=CALU
CAMKV	CaM Kinase Like Vesicle Associated	1G5, VACAMKL	http://www.genecards.org/cgi-bin/carddisp.pl?gene=CAMKV
CAMTA1	Calmodulin Binding Transcription Activator 1	CANPMR, KIAA0833	http://www.genecards.org/cgi-bin/carddisp.pl?gene=CAMTA1
CASC1	Cancer Susceptibility 1	LAS1, PPP1R54	http://www.genecards.org/cgi-bin/carddisp.pl?gene=CASC1
CASC4	Cancer Susceptibility 4	H63	http://www.genecards.org/cgi-bin/carddisp.pl?gene=CASC4
CASK	Calcium/Calmodulin Dependent Serine Protein Kinase	CAGH39, CAMGUK, CMG, FGS4, MICPCH, MRXSNA, TNRC8, LIN2, hCASK	http://www.genecards.org/cgi-bin/carddisp.pl?gene=CASK
CASKIN1	CASK Interacting Protein 1	ANKS5A, caskin-1, KIAA1306	http://www.genecards.org/cgi-bin/carddisp.pl?gene=CASKIN1
CASP8	Caspase 8	ALPS2B, Casp-8, caspase-8, CAP4, FLICE, MACH, MCH5	http://www.genecards.org/cgi-bin/carddisp.pl?gene=CASP8
CASTOR1	Cytosolic Arginine Sensor For MTORC1 Subunit 1	GATSL3	http://www.genecards.org/cgi-bin/carddisp.pl?gene=CASTOR1
CBLN1	Cerebellin 1 Precursor	precerebellin, cerebellin-1	http://www.genecards.org/cgi-bin/carddisp.pl?gene=CBLN1
CBX7	Chromobox 7		http://www.genecards.org/cgi-bin/carddisp.pl?gene=CBX7
CBX8	Chromobox 8	Pc3, hPc3, RC1	http://www.genecards.org/cgi-bin/carddisp.pl?gene=CBX8
CCDC136	Coiled-Coil Domain Containing 136	NAG6, KIAA1793	http://www.genecards.org/cgi-bin/carddisp.pl?gene=CCDC136
CCDC25	Coiled-Coil Domain Containing 25		http://www.genecards.org/cgi-bin/carddisp.pl?gene=CCDC25
CCDC47	Coiled-Coil Domain Containing 47	GK001, MSTP041, Calumin	http://www.genecards.org/cgi-bin/carddisp.pl?gene=CCDC47
CCDC84	Coiled-Coil Domain Containing 84	DLNB14	http://www.genecards.org/cgi-bin/carddisp.pl?gene=CCDC84
CCDC85A	Coiled-Coil Domain Containing 85A	KIAA1912	http://www.genecards.org/cgi-bin/carddisp.pl?gene=CCDC85A
CCNE1	Cyclin E1	pCCNE1, CCNE	http://www.genecards.org/cgi-bin/carddisp.pl?gene=CCNE1
CCNH	Cyclin H	CAK, CycH, cyclin-H, p34, p37	http://www.genecards.org/cgi-bin/carddisp.pl?gene=CCNH
CCT4	Chaperonin Containing TCP1 Subunit 4	CCT-DELTA, Cctd, SRB, TCP-1-delta	http://www.genecards.org/cgi-bin/carddisp.pl?gene=CCT4
CD59	CD59 Molecule (CD59 Blood Group)	16.3A5, 1F5, EJ16, EJ30, EL32, G344, MEM43, p18-20, protectin, MIC11, MIN1, MIN2, MIN3, MSK21, HRF-20, HRF20, MAC-IP, MACIF, MIRL	http://www.genecards.org/cgi-bin/carddisp.pl?gene=CD59
CD9	CD9 Molecule	tetraspanin-29, MIC3, Tspan-29, p24, MRP-1, TSPAN29, BTCC-1, DRAP-27	http://www.genecards.org/cgi-bin/carddisp.pl?gene=CD9
CDC37	Cell Division Cycle 37	P50CDC37, CDC37A	http://www.genecards.org/cgi-bin/carddisp.pl?gene=CDC37
CDC37L1	Cell Division Cycle 37 Like 1	CDC37B, HARC	http://www.genecards.org/cgi-bin/carddisp.pl?gene=CDC37L1
CDH2	Cadherin 2	N-cadherin, CD325, cadherin-2, NCAD, CDHN, CDw325	http://www.genecards.org/cgi-bin/carddisp.pl?gene=CDH2
CDH8	Cadherin 8	Nbla04261, cadherin-8	http://www.genecards.org/cgi-bin/carddisp.pl?gene=CDH8
CDK5R1	Cyclin Dependent Kinase 5 Regulatory Subunit 1	CDK5P35, p23, p25, p35, p35nck5a, CDK5R, NCK5A	http://www.genecards.org/cgi-bin/carddisp.pl?gene=CDK5R1
CDKN1A	Cyclin Dependent Kinase Inhibitor 1A	P21, p21CIP1, CDKN1, MDA6, PIC1, CAP20, CIP1, MDA-6, SDI1, WAF1	http://www.genecards.org/cgi-bin/carddisp.pl?gene=CDKN1A
CELF3	CUGBP Elav-Like Family Member 3	TNRC4, CELF-3, BRUNOL1, CAGH4, ERDA4, ETR-1	http://www.genecards.org/cgi-bin/carddisp.pl?gene=CELF3
CEP170	Centrosomal Protein 170	KIAA0470, Cep170, FAM68A, KAB	http://www.genecards.org/cgi-bin/carddisp.pl?gene=CEP170
CFL1	Cofilin 1	HEL-S-15, cofilin, cofilin-1, CFL, p18	http://www.genecards.org/cgi-bin/carddisp.pl?gene=CFL1
CHGA	Chromogranin A	CGA, catestatin, chromofungin, chromogranin-A, SP-I, vasostatin, pancreastatin, parastatin	http://www.genecards.org/cgi-bin/carddisp.pl?gene=CHGA
CHGB	Chromogranin B	cgB, secretogranin-1, sgI, SCG1, Chromogranin-B	http://www.genecards.org/cgi-bin/carddisp.pl?gene=CHGB
CHN1	Chimerin 1	N-chimaerin, RHOGAP2, a2-chimaerin, alpha-chimerin, n-chimerin, DURS2, CHN, A-chimaerin, ARHGAP2, NC	http://www.genecards.org/cgi-bin/carddisp.pl?gene=CHN1
CHN2	Chimerin 2	Beta-chimerin, ARHGAP3, BCH, beta3-chimaerin, beta-chimaerin, CHN2-3, RHOGAP3	http://www.genecards.org/cgi-bin/carddisp.pl?gene=CHN2
CHRM4	Cholinergic Receptor Muscarinic 4	HM4, M4R	http://www.genecards.org/cgi-bin/carddisp.pl?gene=CHRM4
CHRNA7	Cholinergic Receptor Nicotinic Alpha 7 Subunit	CHRNA7-2, NACHRA7	http://www.genecards.org/cgi-bin/carddisp.pl?gene=CHRNA7
CIC	Capicua Transcriptional Repressor	KIAA0306, MRD45	http://www.genecards.org/cgi-bin/carddisp.pl?gene=CIC
CINP	Cyclin Dependent Kinase 2 Interacting Protein		http://www.genecards.org/cgi-bin/carddisp.pl?gene=CINP
CIRBP	Cold Inducible RNA Binding Protein	A18HNRNP, CIRP	http://www.genecards.org/cgi-bin/carddisp.pl?gene=CIRBP
CKAP5	Cytoskeleton Associated Protein 5	TOGp, ch-TOG, TOG, CHTOG, MSPS, KIAA0097	http://www.genecards.org/cgi-bin/carddisp.pl?gene=CKAP5
CKB	Creatine Kinase B	B-CK, CKBB, CPK-B, HEL-211, HEL-S-29, BCK	http://www.genecards.org/cgi-bin/carddisp.pl?gene=CKB
CLCN7	Chloride Voltage-Gated Channel 7	ClC-7, OPTA2, OPTB4, PPP1R63, CLC7	http://www.genecards.org/cgi-bin/carddisp.pl?gene=CLCN7
CLDN19	Claudin 19	HOMG5, claudin-19	http://www.genecards.org/cgi-bin/carddisp.pl?gene=CLDN19
CLMP	CXADR Like Membrane Protein	CSBM, CSBS, ACAM, ASAM	http://www.genecards.org/cgi-bin/carddisp.pl?gene=CLMP
CLSTN3	Calsyntenin 3	CDHR14, CSTN3, alc-beta, alcbeta, calsyntenin-3, Alcadein-beta, CS3, KIAA0726	http://www.genecards.org/cgi-bin/carddisp.pl?gene=CLSTN3
CLTCL1	Clathrin Heavy Chain Like 1	CHC22, CLTCL, CLH-22, CLH22, CLTD	http://www.genecards.org/cgi-bin/carddisp.pl?gene=CLTCL1
CLU	Clusterin	AAG4, APO-J, CLU1, SP-40, CLU2, SGP-2, SGP2, TRPM2, clusterin, APOJ, CLI, KUB1, NA1/NA2, TRPM-2	http://www.genecards.org/cgi-bin/carddisp.pl?gene=CLU
CMC1	C-X9-C Motif Containing 1	Cmc1p, C3orf68	http://www.genecards.org/cgi-bin/carddisp.pl?gene=CMC1
CMKLR1	Chemerin Chemokine-Like Receptor 1	CHEMERINR, ChemR23, RVER1, DEZ	http://www.genecards.org/cgi-bin/carddisp.pl?gene=CMKLR1
CNTD1	Cyclin N-Terminal Domain Containing 1	CNTD	http://www.genecards.org/cgi-bin/carddisp.pl?gene=CNTD1
CNTF	Ciliary Neurotrophic Factor	HCNTF	http://www.genecards.org/cgi-bin/carddisp.pl?gene=CNTF
COL25A1	Collagen Type XXV Alpha 1 Chain	CFEOM5, CLAC, CLACP, AMY, CLAC-P	http://www.genecards.org/cgi-bin/carddisp.pl?gene=COL25A1
COL4A5	Collagen Type IV Alpha 5 Chain	ATS, ASLN, CA54, dA149D17.3, dA24A23.1	http://www.genecards.org/cgi-bin/carddisp.pl?gene=COL4A5
COLQ	Collagen Like Tail Subunit Of Asymmetric Acetylcholinesterase	CMS5, EAD	http://www.genecards.org/cgi-bin/carddisp.pl?gene=COLQ
COPB2	Coatomer Protein Complex Subunit Beta 2	MCPH19, beta-COP, betaprime-COP, p102	http://www.genecards.org/cgi-bin/carddisp.pl?gene=COPB2
COPG1	Coatomer Protein Complex Subunit Gamma 1	gamma-1-COP, gamma-COP, COPG	http://www.genecards.org/cgi-bin/carddisp.pl?gene=COPG1
COPG2	Coatomer Protein Complex Subunit Gamma 2	2-COP, gamma-2-COP	http://www.genecards.org/cgi-bin/carddisp.pl?gene=COPG2
COPZ1	Coatomer Protein Complex Subunit Zeta 1	CGI-120, HSPC181, zeta-COP, zeta1-COP, COPZ	http://www.genecards.org/cgi-bin/carddisp.pl?gene=COPZ1
COPZ2	Coatomer Protein Complex Subunit Zeta 2	zeta2-COP	http://www.genecards.org/cgi-bin/carddisp.pl?gene=COPZ2
CP	Ceruloplasmin	ceruloplasmin, CP-2, Ferroxidase	http://www.genecards.org/cgi-bin/carddisp.pl?gene=CP
CPE	Carboxypeptidase E	CPH	http://www.genecards.org/cgi-bin/carddisp.pl?gene=CPE
CPSF6	Cleavage And Polyadenylation Specific Factor 6	CFIM, CFIM72, HPBRII-4, HPBRII-7, CFIm68	http://www.genecards.org/cgi-bin/carddisp.pl?gene=CPSF6
CRABP1	Cellular Retinoic Acid Binding Protein 1	RBP5, CRABP-I, CRABPI, CRABP	http://www.genecards.org/cgi-bin/carddisp.pl?gene=CRABP1
CRBN	Cereblon	MRT2, MRT2A, cereblon	http://www.genecards.org/cgi-bin/carddisp.pl?gene=CRBN
CRY1	Cryptochrome Circadian Regulator 1	DSPD, cryptochrome-1, PHLL1	http://www.genecards.org/cgi-bin/carddisp.pl?gene=CRY1
CS	Citrate Synthase		http://www.genecards.org/cgi-bin/carddisp.pl?gene=CS
CSDE1	Cold Shock Domain Containing E1	KIAA0885, NRAS-related, D1S155E, NRU, UNR	http://www.genecards.org/cgi-bin/carddisp.pl?gene=CSDE1
CSNK1D	Casein Kinase 1 Delta	ASPS, CKI-delta, CKId, HCKID, CKIdelta, FASPS2	http://www.genecards.org/cgi-bin/carddisp.pl?gene=CSNK1D
CSNK2B	Casein Kinase 2 Beta	CK2B, CSK2B, CSNK2B-LY6G5B-1072, CSNK2B-LY6G5B-1103, CSNK2B-LY6G5B-532, CSNK2B-LY6G5B-560, CSNK2B-LY6G5B-562, Ckb1, Ckb2, phosvitin, CK2N, G5A	http://www.genecards.org/cgi-bin/carddisp.pl?gene=CSNK2B
CSRP1	Cysteine And Glycine Rich Protein 1	D1S181E, HEL-S-286, CYRP, CRP, CRP1, CSRP, HEL-141	http://www.genecards.org/cgi-bin/carddisp.pl?gene=CSRP1
CTDSPL2	CTD Small Phosphatase Like 2	HSPC058, HSPC129	http://www.genecards.org/cgi-bin/carddisp.pl?gene=CTDSPL2
CUL3	Cullin 3	KIAA0617, CUL-3, cullin-3, PHA2E	http://www.genecards.org/cgi-bin/carddisp.pl?gene=CUL3
CWC15	CWC15 Spliceosome Associated Protein Homolog	HSPC148, ORF5, AD002, Cwf15, C11orf5	http://www.genecards.org/cgi-bin/carddisp.pl?gene=CWC15
CYP3A5	Cytochrome P450 Family 3 Subfamily A Member 5	CP35, P450PCN3, PCN3, CYPIIIA5	http://www.genecards.org/cgi-bin/carddisp.pl?gene=CYP3A5
CYTH3	Cytohesin 3	cytohesin-3, PSCD3, Grp1, ARNO3	http://www.genecards.org/cgi-bin/carddisp.pl?gene=CYTH3
DBNDD2	Dysbindin Domain Containing 2	C20orf35, CK1BP, HSMNP1	http://www.genecards.org/cgi-bin/carddisp.pl?gene=DBNDD2
DBP	D-Box Binding PAR BZIP Transcription Factor	DABP, taxREB302	http://www.genecards.org/cgi-bin/carddisp.pl?gene=DBP
DCAF15	DDB1 And CUL4 Associated Factor 15	C19orf72	http://www.genecards.org/cgi-bin/carddisp.pl?gene=DCAF15
DCBLD2	Discoidin, CUB And LCCL Domain Containing 2	1700055P21Rik, CLCP1, ESDN	http://www.genecards.org/cgi-bin/carddisp.pl?gene=DCBLD2
DCP1B	Decapping MRNA 1B	DCP1	http://www.genecards.org/cgi-bin/carddisp.pl?gene=DCP1B
DCTN3	Dynactin Subunit 3	DCTN-22, DCTN22, p22	http://www.genecards.org/cgi-bin/carddisp.pl?gene=DCTN3
DCTN4	Dynactin Subunit 4	DYN4, P62	http://www.genecards.org/cgi-bin/carddisp.pl?gene=DCTN4
DDIT3	DNA Damage Inducible Transcript 3	C/EBPzeta, CEBPZ, CHOP, CHOP-10, CHOP10, DDIT-3, GADD153	http://www.genecards.org/cgi-bin/carddisp.pl?gene=DDIT3
DDOST	Dolichyl-Diphosphooligosaccharide--Protein Glycosyltransferase Non-Catalytic Subunit	AGER1, CDG1R, GATD6, WBP1, OKSWcl45, OST, KIAA0115, OST48	http://www.genecards.org/cgi-bin/carddisp.pl?gene=DDOST
DDX46	DEAD-Box Helicase 46	PRPF5, Prp5, KIAA0801	http://www.genecards.org/cgi-bin/carddisp.pl?gene=DDX46
DDX5	DEAD-Box Helicase 5	HUMP68, p68, G17P1, HLR1, HELR	http://www.genecards.org/cgi-bin/carddisp.pl?gene=DDX5
DDX6	DEAD-Box Helicase 6	P54, HLR2, RCK	http://www.genecards.org/cgi-bin/carddisp.pl?gene=DDX6
DEF6	DEF6, Guanine Nucleotide Exchange Factor	SLAT, DEF-6, SWAP70L, IBP	http://www.genecards.org/cgi-bin/carddisp.pl?gene=DEF6
DGKI	Diacylglycerol Kinase Iota	DGK-iota	http://www.genecards.org/cgi-bin/carddisp.pl?gene=DGKI
DIDO1	Death Inducer-Obliterator 1	C20orf158, DATF1, KIAA0333, hDido1, DATF-1, DIO-1, DIO1, DIDO3, DIDO2, BYE1, dJ885L7.8	http://www.genecards.org/cgi-bin/carddisp.pl?gene=DIDO1
DIRAS1	DIRAS Family GTPase 1	Di-Ras1, RIG, GBTS1	http://www.genecards.org/cgi-bin/carddisp.pl?gene=DIRAS1
DLGAP1	DLG Associated Protein 1	DAP1, GKAP, DAP-1, hGKAP, DLGAP1A, DLGAP1B, DAP-1-BETA, DAP-1-ALPHA, SAPAP1	http://www.genecards.org/cgi-bin/carddisp.pl?gene=DLGAP1
DLX4	Distal-Less Homeobox 4	OFC15, DLX7, DLX9, BP1, DLX8	http://www.genecards.org/cgi-bin/carddisp.pl?gene=DLX4
DMXL2	Dmx Like 2	KIAA0856, rabconnectin-3, DFNA71, PEPNS, RC3	http://www.genecards.org/cgi-bin/carddisp.pl?gene=DMXL2
DNAJA1	DnaJ Heat Shock Protein Family (Hsp40) Member A1	DjA1, NEDD7, hDJ-2, DJ-2, HSPF4, HSJ2, DNAJ2, HSDJ, HSJ-2, HDJ2	http://www.genecards.org/cgi-bin/carddisp.pl?gene=DNAJA1
DNAJA2	DnaJ Heat Shock Protein Family (Hsp40) Member A2	Dj3, Dnj3, HIRIP4, CPR3, RDJ2, DJA2, DNAJ, PRO3015	http://www.genecards.org/cgi-bin/carddisp.pl?gene=DNAJA2
DNAJB11	DnaJ Heat Shock Protein Family (Hsp40) Member B11	ABBP2, DJ9, Dj-9, PRO1080, ERj3, UNQ537, hDj-9, HDJ9, HEDJ, EDJ, ABBP-2, ERdj3, ERj3p	http://www.genecards.org/cgi-bin/carddisp.pl?gene=DNAJB11
DNAJB2	DnaJ Heat Shock Protein Family (Hsp40) Member B2	CMT2T, DSMA5, HSJ1, HSJ-1, HSPF3	http://www.genecards.org/cgi-bin/carddisp.pl?gene=DNAJB2
DNAJC5G	DnaJ Heat Shock Protein Family (Hsp40) Member C5 Gamma	gamma-CSP, CSP-gamma	http://www.genecards.org/cgi-bin/carddisp.pl?gene=DNAJC5G
DNM3	Dynamin 3	dynamin-3, KIAA0820, T-dynamin	http://www.genecards.org/cgi-bin/carddisp.pl?gene=DNM3
DOC2B	Double C2 Domain Beta	doc2-beta, DOC2BL	http://www.genecards.org/cgi-bin/carddisp.pl?gene=DOC2B
DPP6	Dipeptidyl Peptidase Like 6	DPL1, VF2, MRD33, DPPX	http://www.genecards.org/cgi-bin/carddisp.pl?gene=DPP6
DPYSL3	Dihydropyrimidinase Like 3	DRP-3, DRP3, ULIP, ULIP-1, LCRMP, ULIP1, CRMP-4, CRMP4	http://www.genecards.org/cgi-bin/carddisp.pl?gene=DPYSL3
DRAP1	DR1 Associated Protein 1	NC2-alpha	http://www.genecards.org/cgi-bin/carddisp.pl?gene=DRAP1
DTX1	Deltex E3 Ubiquitin Ligase 1	hDTX1, Deltex1, RNF140, hDx-1	http://www.genecards.org/cgi-bin/carddisp.pl?gene=DTX1
DYNC1H1	Dynein Cytoplasmic 1 Heavy Chain 1	CMT2O, DHC1a, SMALED1, HL-3, Dnchc1, DNCH1, DNCL, p22, DNECL, DYHC, KIAA0325, DHC1	http://www.genecards.org/cgi-bin/carddisp.pl?gene=DYNC1H1
DYRK1A	Dual Specificity Tyrosine Phosphorylation Regulated Kinase 1A	MRD7, DYRK1, DYRK, MNBH, hMNB, HP86, MNB	http://www.genecards.org/cgi-bin/carddisp.pl?gene=DYRK1A
EDF1	Endothelial Differentiation Related Factor 1	CFAP280, MBF1, EDF-1	http://www.genecards.org/cgi-bin/carddisp.pl?gene=EDF1
EEF1AKMT3	EEF1A Lysine Methyltransferase 3	FAM119B, METTL21B, HCA557A	http://www.genecards.org/cgi-bin/carddisp.pl?gene=EEF1AKMT3
EFNB1	Ephrin B1	LERK-2, ELK-L, EPLG2, EFL-3, CFND, EFB1, CFNS, ephrin-B1, LERK2, EFL3	http://www.genecards.org/cgi-bin/carddisp.pl?gene=EFNB1
EIF1AX	Eukaryotic Translation Initiation Factor 1A X-Linked	EIF1AP1, eIF-1A, EIF1A, EIF4C, eIF-4C	http://www.genecards.org/cgi-bin/carddisp.pl?gene=EIF1AX
EIF2S2	Eukaryotic Translation Initiation Factor 2 Subunit Beta	EIF2beta, PPP1R67, EIF2, EIF2B, eIF-2-beta	http://www.genecards.org/cgi-bin/carddisp.pl?gene=EIF2S2
EIF3B	Eukaryotic Translation Initiation Factor 3 Subunit B	EIF3-ETA, EIF3-P110, EIF3-P116, PRT1, EIF3S9, eIF-3-eta, eIF3b, hPrt1	http://www.genecards.org/cgi-bin/carddisp.pl?gene=EIF3B
EIF3D	Eukaryotic Translation Initiation Factor 3 Subunit D	eIF3-p66, eIF3-zeta, EIF3S7, eIF-3-zeta, eIF3d	http://www.genecards.org/cgi-bin/carddisp.pl?gene=EIF3D
EIF4E2	Eukaryotic Translation Initiation Factor 4E Family Member 2	4E-LP, 4EHP, IF4e, h4EHP, EIF4EL3	http://www.genecards.org/cgi-bin/carddisp.pl?gene=EIF4E2
EIF5	Eukaryotic Translation Initiation Factor 5	EIF-5, EIF-5A	http://www.genecards.org/cgi-bin/carddisp.pl?gene=EIF5
EIF5A	Eukaryotic Translation Initiation Factor 5A	EIF-5A, EIF5A1, eIF5AI, eIF-4D, eIF-5A-1, eIF-5A1	http://www.genecards.org/cgi-bin/carddisp.pl?gene=EIF5A
EIF6	Eukaryotic Translation Initiation Factor 6	b(2)gcn, p27BBP, EIF3A, ITGB4BP, CAB, eIF-6, p27(BBP)	http://www.genecards.org/cgi-bin/carddisp.pl?gene=EIF6
ELAVL1	ELAV Like RNA Binding Protein 1	MelG, Hua, HuR, ELAV1	http://www.genecards.org/cgi-bin/carddisp.pl?gene=ELAVL1
ELMO1	Engulfment And Cell Motility 1	CED-12, CED12, ELMO-1, KIAA0281	http://www.genecards.org/cgi-bin/carddisp.pl?gene=ELMO1
ELOVL1	ELOVL Fatty Acid Elongase 1	CGI-88, Ssc1	http://www.genecards.org/cgi-bin/carddisp.pl?gene=ELOVL1
ELOVL6	ELOVL Fatty Acid Elongase 6	FACE, FAE, LCE, hELO2	http://www.genecards.org/cgi-bin/carddisp.pl?gene=ELOVL6
EMC2	ER Membrane Protein Complex Subunit 2	TTC35, KIAA0103	http://www.genecards.org/cgi-bin/carddisp.pl?gene=EMC2
EML1	Echinoderm Microtubule Associated Protein Like 1	EMAPL, huEMAP-1, EMAP, HuEMAP, ELP79, BH, EMAP1, EMAPL1, EMAP-1	http://www.genecards.org/cgi-bin/carddisp.pl?gene=EML1
EML5	Echinoderm Microtubule Associated Protein Like 5	EMAP-5, EMAP-2	http://www.genecards.org/cgi-bin/carddisp.pl?gene=EML5
ENO2	Enolase 2	NSE, gamma-enolase, HEL-S-279	http://www.genecards.org/cgi-bin/carddisp.pl?gene=ENO2
ENY2	ENY2, Transcription And Export Complex 2 Subunit	DC6, Sus1, e(y)2	http://www.genecards.org/cgi-bin/carddisp.pl?gene=ENY2
EPB41L1	Erythrocyte Membrane Protein Band 4.1 Like 1	MRD11, 4.1N, KIAA0338	http://www.genecards.org/cgi-bin/carddisp.pl?gene=EPB41L1
EPDR1	Ependymin Related 1	EPDR, UCC1, MERP-1, MERP1	http://www.genecards.org/cgi-bin/carddisp.pl?gene=EPDR1
EPN1	Epsin 1	epsin-1	http://www.genecards.org/cgi-bin/carddisp.pl?gene=EPN1
EPS15	Epidermal Growth Factor Receptor Pathway Substrate 15	AF1P, AF-1P, MLLT5	http://www.genecards.org/cgi-bin/carddisp.pl?gene=EPS15
EPS8L1	EPS8 Like 1	PP10566, DRC3, EPS8R1	http://www.genecards.org/cgi-bin/carddisp.pl?gene=EPS8L1
ERGIC1	Endoplasmic Reticulum-Golgi Intermediate Compartment 1	AMCN, NET24, KIAA1181, ERGIC-32, ERGIC32	http://www.genecards.org/cgi-bin/carddisp.pl?gene=ERGIC1
ERLIN1	ER Lipid Raft Associated 1	Erlin-1, SPG62, C10orf69, SPFH1, KE04, KEO4	http://www.genecards.org/cgi-bin/carddisp.pl?gene=ERLIN1
ERP44	Endoplasmic Reticulum Protein 44	PDIA10, TXNDC4, ERp44, KIAA0573	http://www.genecards.org/cgi-bin/carddisp.pl?gene=ERP44
ESCO1	Establishment Of Sister Chromatid Cohesion N-Acetyltransferase 1	KIAA1911, EFO1, EFO1p, hEFO1, ECO1, ESO1, A930014I12Rik, CTF	http://www.genecards.org/cgi-bin/carddisp.pl?gene=ESCO1
ESRRA	Estrogen Related Receptor Alpha	ERRalpha, ERRa, ESRL1, ERR-alpha, ERR1, NR3B1	http://www.genecards.org/cgi-bin/carddisp.pl?gene=ESRRA
ETF1	Eukaryotic Translation Termination Factor 1	D5S1995, ERF, ERF1, SUP45L1, RF1, TB3-1	http://www.genecards.org/cgi-bin/carddisp.pl?gene=ETF1
EVA1C	Eva-1 Homolog C	C21orf64, C21orf63, FAM176C, SUE21, B19, B18, PRED34	http://www.genecards.org/cgi-bin/carddisp.pl?gene=EVA1C
EXOC1	Exocyst Complex Component 1	SEC3L1, SEC3, BM-102, SEC3P	http://www.genecards.org/cgi-bin/carddisp.pl?gene=EXOC1
EZH1	Enhancer Of Zeste 1 Polycomb Repressive Complex 2 Subunit	ENX-2, KMT6B, KIAA0388	http://www.genecards.org/cgi-bin/carddisp.pl?gene=EZH1
EZR	Ezrin	p81, ezrin, Villin-2, Cytovillin, HEL-S-105, VIL2, CVL, CVIL	http://www.genecards.org/cgi-bin/carddisp.pl?gene=EZR
FAAP100	FA Core Complex Associated Protein 100	C17orf70	http://www.genecards.org/cgi-bin/carddisp.pl?gene=FAAP100
FABP7	Fatty Acid Binding Protein 7	FABPB, MRG, B-FABP, BLBP	http://www.genecards.org/cgi-bin/carddisp.pl?gene=FABP7
FADS2	Fatty Acid Desaturase 2	SLL0262, TU13, LLCDL2, delta-6-desaturase, DES6, FADSD6, D6D	http://www.genecards.org/cgi-bin/carddisp.pl?gene=FADS2
FAIM2	Fas Apoptotic Inhibitory Molecule 2	KIAA0950, LFG, LFG2, NMP35, TMBIM2, NGP35	http://www.genecards.org/cgi-bin/carddisp.pl?gene=FAIM2
FAM107B	Family With Sequence Similarity 107 Member B	C10orf45, HITS	http://www.genecards.org/cgi-bin/carddisp.pl?gene=FAM107B
FAM131A	Family With Sequence Similarity 131 Member A	FLAT715, PRO1378, C3orf40	http://www.genecards.org/cgi-bin/carddisp.pl?gene=FAM131A
FAM131B	Family With Sequence Similarity 131 Member B	KIAA0773	http://www.genecards.org/cgi-bin/carddisp.pl?gene=FAM131B
FAM168A	Family With Sequence Similarity 168 Member A	KIAA0280, TCRP1	http://www.genecards.org/cgi-bin/carddisp.pl?gene=FAM168A
FAM208A	Family With Sequence Similarity 208 Member A	RAP140, se89-1, C3orf63, KIAA1105, TASOR	http://www.genecards.org/cgi-bin/carddisp.pl?gene=FAM208A
FAM221A	Family With Sequence Similarity 221 Member A	C7orf46	http://www.genecards.org/cgi-bin/carddisp.pl?gene=FAM221A
FANCB	FA Complementation Group B	FA2, FAAP90, FAB, FAAP95, FACB	http://www.genecards.org/cgi-bin/carddisp.pl?gene=FANCB
FAT3	FAT Atypical Cadherin 3	CDHR10, KIAA1989, CDHF15, hFat3	http://www.genecards.org/cgi-bin/carddisp.pl?gene=FAT3
FBXL14	F-Box And Leucine Rich Repeat Protein 14	Fbl14	http://www.genecards.org/cgi-bin/carddisp.pl?gene=FBXL14
FBXL20	F-Box And Leucine Rich Repeat Protein 20	FBL2, Fbl20	http://www.genecards.org/cgi-bin/carddisp.pl?gene=FBXL20
FBXL3	F-Box And Leucine Rich Repeat Protein 3	FBXL3A, FBL3, FBL3A	http://www.genecards.org/cgi-bin/carddisp.pl?gene=FBXL3
FBXO46	F-Box Protein 46	FBXO34L, FBX46, 20D7-FC4	http://www.genecards.org/cgi-bin/carddisp.pl?gene=FBXO46
FBXW11	F-Box And WD Repeat Domain Containing 11	BTRC2, Fbw11, Hos, FBXW1B, KIAA0696, BTRCP2, FBW1B	http://www.genecards.org/cgi-bin/carddisp.pl?gene=FBXW11
FEZ1	Fasciculation And Elongation Protein Zeta 1	UNC-76, Zygin-1	http://www.genecards.org/cgi-bin/carddisp.pl?gene=FEZ1
FGL2	Fibrinogen Like 2	T49, fibroleukin, pT49	http://www.genecards.org/cgi-bin/carddisp.pl?gene=FGL2
FIS1	Fission, Mitochondrial 1	hFis1, TTC11, H_NH0132A01.6, CGI-135	http://www.genecards.org/cgi-bin/carddisp.pl?gene=FIS1
FLNB	Filamin B	ABP-280, filamin-B, filamin-3, beta-filamin, SCT, AOI, FH1, ABP-278, FLN-B, TABP, TAP, FLN3, FLN1L, LRS1	http://www.genecards.org/cgi-bin/carddisp.pl?gene=FLNB
FNBP1	Formin Binding Protein 1	FBP17, hFBP17, KIAA0554	http://www.genecards.org/cgi-bin/carddisp.pl?gene=FNBP1
FOXP4	Forkhead Box P4	hFKHLA, FKHLA	http://www.genecards.org/cgi-bin/carddisp.pl?gene=FOXP4
FRA10AC1	FRA10A Associated CGG Repeat 1	F26C11.1-like, FRA10A, C10orf4	http://www.genecards.org/cgi-bin/carddisp.pl?gene=FRA10AC1
FRYL	FRY Like Transcription Coactivator	AF4p12, FRY-like, MOR2, furry-like, KIAA0826	http://www.genecards.org/cgi-bin/carddisp.pl?gene=FRYL
FUBP3	Far Upstream Element Binding Protein 3	FBP3	http://www.genecards.org/cgi-bin/carddisp.pl?gene=FUBP3
FUNDC1	FUN14 Domain Containing 1		http://www.genecards.org/cgi-bin/carddisp.pl?gene=FUNDC1
FXYD6	FXYD Domain Containing Ion Transport Regulator 6	phosphohippolin	http://www.genecards.org/cgi-bin/carddisp.pl?gene=FXYD6
FZR1	Fizzy And Cell Division Cycle 20 Related 1	HCDH, FZR2, CDC20C, Fzr, KIAA1242, CDH1, HCDH1, FYR	http://www.genecards.org/cgi-bin/carddisp.pl?gene=FZR1
G3BP2	G3BP Stress Granule Assembly Factor 2	KIAA0660, G3BP-2	http://www.genecards.org/cgi-bin/carddisp.pl?gene=G3BP2
GABRB2	Gamma-Aminobutyric Acid Type A Receptor Beta2 Subunit	ICEE2	http://www.genecards.org/cgi-bin/carddisp.pl?gene=GABRB2
GAS7	Growth Arrest Specific 7	GAS-7, KIAA0394	http://www.genecards.org/cgi-bin/carddisp.pl?gene=GAS7
GDI1	GDP Dissociation Inhibitor 1	MRX48, MRX41, GDIL, RABGD1A, XAP-4, oligophrenin-2, 1A, RABGDIA, OPHN2, GDI-1, XAP4	http://www.genecards.org/cgi-bin/carddisp.pl?gene=GDI1
GDI2	GDP Dissociation Inhibitor 2	GDI-2, RABGDIB, HEL-S-46e	http://www.genecards.org/cgi-bin/carddisp.pl?gene=GDI2
GFAP	Glial Fibrillary Acidic Protein	ALXDRD	http://www.genecards.org/cgi-bin/carddisp.pl?gene=GFAP
GHITM	Growth Hormone Inducible Transmembrane Protein	My021, PTD010, DERP2, MICS1, TMBIM5, HSPC282	http://www.genecards.org/cgi-bin/carddisp.pl?gene=GHITM
GID8	GID Complex Subunit 8 Homolog	C20orf11, Twa1	http://www.genecards.org/cgi-bin/carddisp.pl?gene=GID8
GIGYF1	GRB10 Interacting GYF Protein 1	PERQ1, CDS2, GYF1	http://www.genecards.org/cgi-bin/carddisp.pl?gene=GIGYF1
GLDC	Glycine Decarboxylase	GCSP, HYGN1, GCE	http://www.genecards.org/cgi-bin/carddisp.pl?gene=GLDC
GLUL	Glutamate-Ammonia Ligase	PIG43, PIG59, GLNS, GS	http://www.genecards.org/cgi-bin/carddisp.pl?gene=GLUL
GNAI1	G Protein Subunit Alpha I1	Gi	http://www.genecards.org/cgi-bin/carddisp.pl?gene=GNAI1
GNAI2	G Protein Subunit Alpha I2	GIP, H_LUCA15.1, H_LUCA16.1, GNAI2B	http://www.genecards.org/cgi-bin/carddisp.pl?gene=GNAI2
GNAL	G Protein Subunit Alpha L	DYT25	http://www.genecards.org/cgi-bin/carddisp.pl?gene=GNAL
GNAS	GNAS Complex Locus	GNAS1, NESP55, XLalphas, GSP, GPSA, NESP, GSA, PITA3, POH, SCG6, SgVI, C20orf45, AHO	http://www.genecards.org/cgi-bin/carddisp.pl?gene=GNAS
GNB1	G Protein Subunit Beta 1	MRD42	http://www.genecards.org/cgi-bin/carddisp.pl?gene=GNB1
GNE	Glucosamine (UDP-N-Acetyl)-2-Epimerase/N-Acetylmannosamine Kinase	DMRV, NM, Uae1, GLCNE, IBM2	http://www.genecards.org/cgi-bin/carddisp.pl?gene=GNE
GNG7	G Protein Subunit Gamma 7	GNGT7	http://www.genecards.org/cgi-bin/carddisp.pl?gene=GNG7
GOLGA7	Golgin A7	GCP16, HSPC041, GOLGA7A, GOLGA3AP1	http://www.genecards.org/cgi-bin/carddisp.pl?gene=GOLGA7
GON4L	Gon-4 Like	GON-4, 2610100B20Rik, YARP, GON4, KIAA1606	http://www.genecards.org/cgi-bin/carddisp.pl?gene=GON4L
GPM6A	Glycoprotein M6A	M6A, GPM6	http://www.genecards.org/cgi-bin/carddisp.pl?gene=GPM6A
GPR176	G Protein-Coupled Receptor 176	HB-954	http://www.genecards.org/cgi-bin/carddisp.pl?gene=GPR176
GPRC5B	G Protein-Coupled Receptor Class C Group 5 Member B	A-69G12.1, RAIG-2, RAIG2	http://www.genecards.org/cgi-bin/carddisp.pl?gene=GPRC5B
GPX4	Glutathione Peroxidase 4	MCSP, SMDS, snGPx, snPHGPx, GPx-4, GSHPx-4, PHGPx	http://www.genecards.org/cgi-bin/carddisp.pl?gene=GPX4
GRIA2	Glutamate Ionotropic Receptor AMPA Type Subunit 2	GluR-K2, gluR-2, gluR-B, GLURB, HBGR2, GluA2, GLUR2	http://www.genecards.org/cgi-bin/carddisp.pl?gene=GRIA2
GRIA4	Glutamate Ionotropic Receptor AMPA Type Subunit 4	gluR-D, gluR-4, NEDSGA, GLURD, GLUR4C, GluR4, GluA4	http://www.genecards.org/cgi-bin/carddisp.pl?gene=GRIA4
GRID2IP	Grid2 Interacting Protein	DELPHILIN	http://www.genecards.org/cgi-bin/carddisp.pl?gene=GRID2IP
GRIN2A	Glutamate Ionotropic Receptor NMDA Type Subunit 2A	hNR2A, GluN2A, NR2A, FESD, EPND, LKS, NMDAR2A	http://www.genecards.org/cgi-bin/carddisp.pl?gene=GRIN2A
GRINA	Glutamate Ionotropic Receptor NMDA Type Subunit Associated Protein 1	HNRGW, NMDARA1, LFG1, TMBIM3	http://www.genecards.org/cgi-bin/carddisp.pl?gene=GRINA
GRK6	G Protein-Coupled Receptor Kinase 6	GPRK6	http://www.genecards.org/cgi-bin/carddisp.pl?gene=GRK6
GRM3	Glutamate Metabotropic Receptor 3	mGluR3, GPRC1C, mGlu3, GLUR3	http://www.genecards.org/cgi-bin/carddisp.pl?gene=GRM3
GRM4	Glutamate Metabotropic Receptor 4	mGlu4, mGluR4, GPRC1D	http://www.genecards.org/cgi-bin/carddisp.pl?gene=GRM4
GTF3A	General Transcription Factor IIIA	TFIIIA, AP2	http://www.genecards.org/cgi-bin/carddisp.pl?gene=GTF3A
H2AFV	H2A Histone Family Member V	H2AV, H2A.F/Z, H2A.Z-2	http://www.genecards.org/cgi-bin/carddisp.pl?gene=H2AFV
HAPLN1	Hyaluronan And Proteoglycan Link Protein 1	CRTL1, CRT1	http://www.genecards.org/cgi-bin/carddisp.pl?gene=HAPLN1
HARS	Histidyl-TRNA Synthetase	CMT2W, HisRS, HRS, USH3B	http://www.genecards.org/cgi-bin/carddisp.pl?gene=HARS
HCK	HCK Proto-Oncogene, Src Family Tyrosine Kinase	JTK9, p59-HCK/p60-HCK, p59Hck, p61Hck	http://www.genecards.org/cgi-bin/carddisp.pl?gene=HCK
HDLBP	High Density Lipoprotein Binding Protein	vigilin, PRO2900, VGL, HBP	http://www.genecards.org/cgi-bin/carddisp.pl?gene=HDLBP
HEPACAM2	HEPACAM Family Member 2	MIKI	http://www.genecards.org/cgi-bin/carddisp.pl?gene=HEPACAM2
HIBCH	3-Hydroxyisobutyryl-CoA Hydrolase	HIBYLCOAH, HIBYL-CoA-H	http://www.genecards.org/cgi-bin/carddisp.pl?gene=HIBCH
HIST1H2AC	Histone Cluster 1 H2A Family Member C	H2A/l, dJ221C16.4, H2AFL	http://www.genecards.org/cgi-bin/carddisp.pl?gene=HIST1H2AC
HIST2H3C	Histone Cluster 2 H3 Family Member C	H3, H3.2, H3/M, H3FN, H3F2, H3FM	http://www.genecards.org/cgi-bin/carddisp.pl?gene=HIST2H3C
HIVEP2	Human Immunodeficiency Virus Type I Enhancer Binding Protein 2	MIBP1, MRD43, SHN2, Schnurri-2, ZAS2, ZNF40B, HIV-EP2, MBP-2	http://www.genecards.org/cgi-bin/carddisp.pl?gene=HIVEP2
HK1	Hexokinase 1	HK, HK1-ta, HK1-tb, HK1-tc, HKD, HKI, HMSNR, HXK1, RP79, hexokinase, hexokinase-1	http://www.genecards.org/cgi-bin/carddisp.pl?gene=HK1
HMGB1	High Mobility Group Box 1	HMG1, HMG-1, HMG3, SBP-1, Amphoterin	http://www.genecards.org/cgi-bin/carddisp.pl?gene=HMGB1
HNRNPA0	Heterogeneous Nuclear Ribonucleoprotein A0	HNRPA0	http://www.genecards.org/cgi-bin/carddisp.pl?gene=HNRNPA0
HNRNPD	Heterogeneous Nuclear Ribonucleoprotein D	AUF1A, HNRPD, hnRNPD0, AUF1, P37	http://www.genecards.org/cgi-bin/carddisp.pl?gene=HNRNPD
HNRNPK	Heterogeneous Nuclear Ribonucleoprotein K	TUNP, HNRPK, CSBP, AUKS	http://www.genecards.org/cgi-bin/carddisp.pl?gene=HNRNPK
HNRNPLL	Heterogeneous Nuclear Ribonucleoprotein L Like	HNRPLL, hnRNPLL, SRRF	http://www.genecards.org/cgi-bin/carddisp.pl?gene=HNRNPLL
HNRNPU	Heterogeneous Nuclear Ribonucleoprotein U	EIEE54, HNRNPU-AS1, C1orf199, HNRPU, p120, GRIP120, SAF-A, SAFA, U21.1, pp120	http://www.genecards.org/cgi-bin/carddisp.pl?gene=HNRNPU
HPCAL1	Hippocalcin Like 1	HLP2, VILIP-3, BDR1	http://www.genecards.org/cgi-bin/carddisp.pl?gene=HPCAL1
HPRT1	Hypoxanthine Phosphoribosyltransferase 1	HPRT, HGPRT, HGPRTase	http://www.genecards.org/cgi-bin/carddisp.pl?gene=HPRT1
HRAS	HRas Proto-Oncogene, GTPase	C-BAS/HAS, C-H-RAS, HRAS1, H-Ras-1, Ha-Ras, p21ras, CTLO, C-HA-RAS1, RASH1, HAMSV, H-RASIDX	http://www.genecards.org/cgi-bin/carddisp.pl?gene=HRAS
HSP90AA1	Heat Shock Protein 90 Alpha Family Class A Member 1	EL52, HEL-S-65p, HSP89A, Hsp89, HSP90N, HSPCAL1, HSPCAL4, HSPN, Hsp103, HSPC1, HSPCA, HSP86, HSP90A, Hsp90, LAP2, LAP-2	http://www.genecards.org/cgi-bin/carddisp.pl?gene=HSP90AA1
HSP90AB1	Heat Shock Protein 90 Alpha Family Class B Member 1	D6S182, HSP84, HSP90B, HSPC2, HSPCB, HSP90-beta	http://www.genecards.org/cgi-bin/carddisp.pl?gene=HSP90AB1
HSPA12A	Heat Shock Protein Family A (Hsp70) Member 12A	KIAA0417	http://www.genecards.org/cgi-bin/carddisp.pl?gene=HSPA12A
HSPA8	Heat Shock Protein Family A (Hsp70) Member 8	HEL-33, HEL-S-72p, HSC54, HSC71, HSP71, LAP1, NIP71, HSPA10, HSC70, HSP73, LAP-1	http://www.genecards.org/cgi-bin/carddisp.pl?gene=HSPA8
HSPBP1	HSPA (Hsp70) Binding Protein 1	HspBP1, HspBP2, HSPBP, FES1	http://www.genecards.org/cgi-bin/carddisp.pl?gene=HSPBP1
HUWE1	HECT, UBA And WWE Domain Containing 1, E3 Ubiquitin Protein Ligase	HECTH9, HSPC272, Ib772, MULE, KIAA0312, KIAA1578, ARF-BP1, LASU1, URE-B1, UREB1	http://www.genecards.org/cgi-bin/carddisp.pl?gene=HUWE1
IBTK	Inhibitor Of Bruton Tyrosine Kinase	BTBD26, BTKI, KIAA1417, IBtk	http://www.genecards.org/cgi-bin/carddisp.pl?gene=IBTK
ID3	Inhibitor Of DNA Binding 3, HLH Protein	HEIR-1, 1R21, BHLHB25, HEIR1	http://www.genecards.org/cgi-bin/carddisp.pl?gene=ID3
IFRD1	Interferon Related Developmental Regulator 1	PC4, TIS7	http://www.genecards.org/cgi-bin/carddisp.pl?gene=IFRD1
INA	Internexin Neuronal Intermediate Filament Protein Alpha	alpha-Inx, alpha-internexin, TXBP-1, NEF5, Neurofilament-66, NF-66	http://www.genecards.org/cgi-bin/carddisp.pl?gene=INA
IP6K2	Inositol Hexakisphosphate Kinase 2	PIUS, IHPK2	http://www.genecards.org/cgi-bin/carddisp.pl?gene=IP6K2
IPO13	Importin 13	LGL2, KAP13, IMP13, KIAA0724, importin-13, Karyopherin-13, RANBP13	http://www.genecards.org/cgi-bin/carddisp.pl?gene=IPO13
IPO7	Importin 7	RanBP7, Imp7, importin-7	http://www.genecards.org/cgi-bin/carddisp.pl?gene=IPO7
IRF2BP2	Interferon Regulatory Factor 2 Binding Protein 2	IRF-2BP2, CVID14	http://www.genecards.org/cgi-bin/carddisp.pl?gene=IRF2BP2
IRX3	Iroquois Homeobox 3	IRXB1, IRX-1	http://www.genecards.org/cgi-bin/carddisp.pl?gene=IRX3
ISLR2	Immunoglobulin Superfamily Containing Leucine Rich Repeat 2	LINX, KIAA1465	http://www.genecards.org/cgi-bin/carddisp.pl?gene=ISLR2
ITGAV	Integrin Subunit Alpha V	MSK8, VNRA, VTNR, CD51	http://www.genecards.org/cgi-bin/carddisp.pl?gene=ITGAV
ITGB1	Integrin Subunit Beta 1	FNRB, MSK12, MDF2, VLAB, VLA-BETA, CD29, GPIIA	http://www.genecards.org/cgi-bin/carddisp.pl?gene=ITGB1
ITM2A	Integral Membrane Protein 2A	BRICD2A, E25A	http://www.genecards.org/cgi-bin/carddisp.pl?gene=ITM2A
JAKMIP2	Janus Kinase And Microtubule Interacting Protein 2	KIAA0555, JAMIP2, NECC1	http://www.genecards.org/cgi-bin/carddisp.pl?gene=JAKMIP2
JAZF1	JAZF Zinc Finger 1	ZNF802, TIP27	http://www.genecards.org/cgi-bin/carddisp.pl?gene=JAZF1
KATNAL2	Katanin Catalytic Subunit A1 Like 2		http://www.genecards.org/cgi-bin/carddisp.pl?gene=KATNAL2
KCNIP2	Potassium Voltage-Gated Channel Interacting Protein 2	KChIP2	http://www.genecards.org/cgi-bin/carddisp.pl?gene=KCNIP2
KCNJ10	Potassium Voltage-Gated Channel Subfamily J Member 10	BIRK-10, KCNJ13-PEN, KIR1.2, KIR4.1, SESAME	http://www.genecards.org/cgi-bin/carddisp.pl?gene=KCNJ10
KCTD3	Potassium Channel Tetramerization Domain Containing 3	NY-REN-45	http://www.genecards.org/cgi-bin/carddisp.pl?gene=KCTD3
KEAP1	Kelch Like ECH Associated Protein 1	INRF2, KIAA0132, KLHL19	http://www.genecards.org/cgi-bin/carddisp.pl?gene=KEAP1
KHDC4	KH Domain Containing 4, Pre-MRNA Splicing Factor	KIAA0907, BLOM7, SNORA80EHG	http://www.genecards.org/cgi-bin/carddisp.pl?gene=KHDC4
KIF1B	Kinesin Family Member 1B	CMT2A1, HMSNII, CMT2, CMT2A, KLP, NBLST1, KIAA1448, KIAA0591	http://www.genecards.org/cgi-bin/carddisp.pl?gene=KIF1B
KIF1C	Kinesin Family Member 1C	LTXS1, SATX2, SPAX2, SPG58, SAX2, KIAA0706	http://www.genecards.org/cgi-bin/carddisp.pl?gene=KIF1C
KIF2A	Kinesin Family Member 2A	CDCBM3, HK2, kinesin-2, KIF2, KNS2	http://www.genecards.org/cgi-bin/carddisp.pl?gene=KIF2A
KIF3A	Kinesin Family Member 3A	KIF3, FLA10, KLP-20	http://www.genecards.org/cgi-bin/carddisp.pl?gene=KIF3A
KIF3C	Kinesin Family Member 3C		http://www.genecards.org/cgi-bin/carddisp.pl?gene=KIF3C
KIT	KIT Proto-Oncogene Receptor Tyrosine Kinase	C-Kit, CD117, PBT, SCFR	http://www.genecards.org/cgi-bin/carddisp.pl?gene=KIT
KLF2	Kruppel Like Factor 2	LKLF	http://www.genecards.org/cgi-bin/carddisp.pl?gene=KLF2
KLHL8	Kelch Like Family Member 8	KIAA1378	http://www.genecards.org/cgi-bin/carddisp.pl?gene=KLHL8
KRAS	KRAS Proto-Oncogene, GTPase	RALD, c-Ki-ras2, NS, NS3, K-Ras, KRAS1, KI-RAS, KRAS2, c-K-ras, RASK2, c-Ki-ras, K-RAS2A, K-RAS2B, K-RAS4A, K-RAS4B, CFC2	http://www.genecards.org/cgi-bin/carddisp.pl?gene=KRAS
KTN1	Kinectin 1	KNT, MU-RMS-40.19, kinectin, KIAA0004, CG1	http://www.genecards.org/cgi-bin/carddisp.pl?gene=KTN1
L1CAM	L1 Cell Adhesion Molecule	HSAS, HSAS1, MASA, S10, SPG1, MIC5, CAML1, N-CAM-L1, NCAM-L1, CD171, N-CAML1	http://www.genecards.org/cgi-bin/carddisp.pl?gene=L1CAM
LARP4	La Ribonucleoprotein Domain Family Member 4	PP13296	http://www.genecards.org/cgi-bin/carddisp.pl?gene=LARP4
LCAT	Lecithin-Cholesterol Acyltransferase		http://www.genecards.org/cgi-bin/carddisp.pl?gene=LCAT
LDHA	Lactate Dehydrogenase A	LDH-A, LDH-M, PIG19, LDHM, HEL-S-133P, GSD11	http://www.genecards.org/cgi-bin/carddisp.pl?gene=LDHA
LDLRAD4	Low Density Lipoprotein Receptor Class A Domain Containing 4	C18orf1	http://www.genecards.org/cgi-bin/carddisp.pl?gene=LDLRAD4
LDLRAP1	Low Density Lipoprotein Receptor Adaptor Protein 1	ARH1, FHCB1, ARH2, FHCB2, ARH	http://www.genecards.org/cgi-bin/carddisp.pl?gene=LDLRAP1
LMO7	LIM Domain 7	LMO7b, FBXO20, FBX20, KIAA0858, LOMP, LMO-7	http://www.genecards.org/cgi-bin/carddisp.pl?gene=LMO7
LNPEP	Leucyl And Cystinyl Aminopeptidase	PLAP, CAP, otase, vasopressinase, oxytocinase, IRAP, P-LAP	http://www.genecards.org/cgi-bin/carddisp.pl?gene=LNPEP
LONRF2	LON Peptidase N-Terminal Domain And Ring Finger 2	RNF192	http://www.genecards.org/cgi-bin/carddisp.pl?gene=LONRF2
LPAR6	Lysophosphatidic Acid Receptor 6	ARWH1, HYPT8, LAH3, P2RY5, LPA-6, P2Y5	http://www.genecards.org/cgi-bin/carddisp.pl?gene=LPAR6
LRFN5	Leucine Rich Repeat And Fibronectin Type III Domain Containing 5	FIGLER8, SALM5, C14orf146	http://www.genecards.org/cgi-bin/carddisp.pl?gene=LRFN5
LRRC24	Leucine Rich Repeat Containing 24	LRRC14OS	http://www.genecards.org/cgi-bin/carddisp.pl?gene=LRRC24
LRRC4B	Leucine Rich Repeat Containing 4B	HSM, LRIG4, NGL-3	http://www.genecards.org/cgi-bin/carddisp.pl?gene=LRRC4B
LRRC7	Leucine Rich Repeat Containing 7	DENSIN, densin-180, KIAA1365, LAP1	http://www.genecards.org/cgi-bin/carddisp.pl?gene=LRRC7
LRRC8D	Leucine Rich Repeat Containing 8 VRAC Subunit D	LRRC5	http://www.genecards.org/cgi-bin/carddisp.pl?gene=LRRC8D
LRTM1	Leucine Rich Repeats And Transmembrane Domains 1	HT017	http://www.genecards.org/cgi-bin/carddisp.pl?gene=LRTM1
LUC7L	LUC7 Like	SR+89, LUC7L1, LUC7-like, LUC7B1, Luc7, hLuc7B1	http://www.genecards.org/cgi-bin/carddisp.pl?gene=LUC7L
LZTS2	Leucine Zipper Tumor Suppressor 2	KIAA1813, hLZTS2, LAPSER1	http://www.genecards.org/cgi-bin/carddisp.pl?gene=LZTS2
M6PR	Mannose-6-Phosphate Receptor, Cation Dependent	CD-M6PR, MPR-46, SMPR, MPRD, CD-MPR, MPR46	http://www.genecards.org/cgi-bin/carddisp.pl?gene=M6PR
MADD	MAP Kinase Activating Death Domain	RAB3GEP, KIAA0358, DENN, IG20	http://www.genecards.org/cgi-bin/carddisp.pl?gene=MADD
MAMDC2	MAM Domain Containing 2	Mamcan	http://www.genecards.org/cgi-bin/carddisp.pl?gene=MAMDC2
MAP1A	Microtubule Associated Protein 1A	MTAP1A, MAP1L, MAP-1A	http://www.genecards.org/cgi-bin/carddisp.pl?gene=MAP1A
MAP1B	Microtubule Associated Protein 1B	FUTSCH, MAP5, PPP1R102, MAP-1B	http://www.genecards.org/cgi-bin/carddisp.pl?gene=MAP1B
MAP4K4	Mitogen-Activated Protein Kinase Kinase Kinase Kinase 4	HGK, KIAA0687, NIK, FLH21957, HEL-S-31, MEKKK4	http://www.genecards.org/cgi-bin/carddisp.pl?gene=MAP4K4
MAPT	Microtubule Associated Protein Tau	MTBT2, PPND, PPP1R103, DDPAC, MAPTL, MTBT1, PHF-tau, TAU, MSTD, FTDP-17	http://www.genecards.org/cgi-bin/carddisp.pl?gene=MAPT
MAST2	Microtubule Associated Serine/Threonine Kinase 2	MAST205, KIAA0807, MTSSK	http://www.genecards.org/cgi-bin/carddisp.pl?gene=MAST2
MBD3	Methyl-CpG Binding Domain Protein 3		http://www.genecards.org/cgi-bin/carddisp.pl?gene=MBD3
MBP	Myelin Basic Protein	Golli-MBP	http://www.genecards.org/cgi-bin/carddisp.pl?gene=MBP
MDM4	MDM4, P53 Regulator	HDMX, MDMX, MRP1	http://www.genecards.org/cgi-bin/carddisp.pl?gene=MDM4
MED1	Mediator Complex Subunit 1	PPARGBP, PPARBP, Trap220, TRIP2, ARC205, DRIP205, CRSP200, CRSP1, DRIP230, PBP, RB18A, TRIP-2	http://www.genecards.org/cgi-bin/carddisp.pl?gene=MED1
MEI1	Meiotic Double-Stranded Break Formation Protein 1	SPATA38	http://www.genecards.org/cgi-bin/carddisp.pl?gene=MEI1
METTL26	Methyltransferase Like 26	C16orf13, JFP2	http://www.genecards.org/cgi-bin/carddisp.pl?gene=METTL26
MFAP3L	Microfibril Associated Protein 3 Like	KIAA0626, NYD-sp9	http://www.genecards.org/cgi-bin/carddisp.pl?gene=MFAP3L
MFGE8	Milk Fat Globule-EGF Factor 8 Protein	EDIL1, BA46, HsT19888, OAcGD3S, hP47, medin, SPAG10, lactadherin, HMFG, MFG-E8, MFGM, SED1	http://www.genecards.org/cgi-bin/carddisp.pl?gene=MFGE8
MGLL	Monoglyceride Lipase	Lysophospholipase-like, HUK5, MGL, MAGL, HU-K5	http://www.genecards.org/cgi-bin/carddisp.pl?gene=MGLL
MIB2	Mindbomb E3 Ubiquitin Protein Ligase 2	ZZZ5, skeletrophin, ZZANK1, novelzin, SKD	http://www.genecards.org/cgi-bin/carddisp.pl?gene=MIB2
MICAL3	Microtubule Associated Monooxygenase, Calponin And LIM Domain Containing 3	KIAA1364, KIAA0819, MICAL-3	http://www.genecards.org/cgi-bin/carddisp.pl?gene=MICAL3
MID1IP1	MID1 Interacting Protein 1	STRAIT11499, THRSPL, G12-like, MIG12, S14R	http://www.genecards.org/cgi-bin/carddisp.pl?gene=MID1IP1
MID2	Midline 2	Midline-2, Midin-2, MRX101, RNF60, FXY2, TRIM1	http://www.genecards.org/cgi-bin/carddisp.pl?gene=MID2
MIER1	MIER1 Transcriptional Regulator	hMi-er1, MI-ER1, ER1, KIAA1610	http://www.genecards.org/cgi-bin/carddisp.pl?gene=MIER1
MINK1	Misshapen Like Kinase 1	MINK, YSK2, ZC3, MAP4K6, B55	http://www.genecards.org/cgi-bin/carddisp.pl?gene=MINK1
MLF2	Myeloid Leukemia Factor 2	NTN4	http://www.genecards.org/cgi-bin/carddisp.pl?gene=MLF2
MPRIP	Myosin Phosphatase Rho Interacting Protein	KIAA0864, M-RIP, MRIP, RHOIP3, RIP3, p116Rip	http://www.genecards.org/cgi-bin/carddisp.pl?gene=MPRIP
MPZ	Myelin Protein Zero	P0, CMT1, CMTDID, DSS, HMSNIB, CMT1B, MPP, CMTDI3, CMT4E, CMT2J, CMT2I, CHM	http://www.genecards.org/cgi-bin/carddisp.pl?gene=MPZ
MPZL2	Myelin Protein Zero Like 2	EVA1, EVA	http://www.genecards.org/cgi-bin/carddisp.pl?gene=MPZL2
MTMR2	Myotubularin Related Protein 2	phosphatidylinositol-3-phosphatase, phosphoinositide-3-phosphatase, CMT4B1, CMT4B, KIAA1073	http://www.genecards.org/cgi-bin/carddisp.pl?gene=MTMR2
MTMR9	Myotubularin Related Protein 9	MTMR8, LIP-STYX, C8orf9	http://www.genecards.org/cgi-bin/carddisp.pl?gene=MTMR9
MTUS1	Microtubule Associated Scaffold Protein 1	ATBP, ATIP, MTSG1, GK1, KIAA1288, MP44, ICIS, ATIP3	http://www.genecards.org/cgi-bin/carddisp.pl?gene=MTUS1
MYEF2	Myelin Expression Factor 2	myEF-2, MSTP156, HsT18564, MEF-2, KIAA1341, MST156	http://www.genecards.org/cgi-bin/carddisp.pl?gene=MYEF2
MYL6B	Myosin Light Chain 6B	MLC1sa	http://www.genecards.org/cgi-bin/carddisp.pl?gene=MYL6B
MYO16	Myosin XVI	MYAP3, MYR8, Myo16b, PPP1R107, KIAA0865, NYAP3	http://www.genecards.org/cgi-bin/carddisp.pl?gene=MYO16
MYRF	Myelin Regulatory Factor	Ndt80, pqn-47, C11orf9, KIAA0954, MRF	http://www.genecards.org/cgi-bin/carddisp.pl?gene=MYRF
MYT1	Myelin Transcription Factor 1	C20orf36, NZF2, ZC2H2C1, ZC2HC4A, PLPB1, KIAA0835, KIAA1050, MyT1, MyTI, MTF1	http://www.genecards.org/cgi-bin/carddisp.pl?gene=MYT1
NACAD	NAC Alpha Domain Containing	KIAA0363	http://www.genecards.org/cgi-bin/carddisp.pl?gene=NACAD
NADK	NAD Kinase	dJ283E3.1	http://www.genecards.org/cgi-bin/carddisp.pl?gene=NADK
NAMPT	Nicotinamide Phosphoribosyltransferase	1110035O14Rik, VF, VISFATIN, PBEF1, Nampt, NAmPRTase, PBEF	http://www.genecards.org/cgi-bin/carddisp.pl?gene=NAMPT
NAP1L1	Nucleosome Assembly Protein 1 Like 1	NAP1, NAP1L, hNRP, NRP	http://www.genecards.org/cgi-bin/carddisp.pl?gene=NAP1L1
NAP1L4	Nucleosome Assembly Protein 1 Like 4	NAP2L, hNAP2, NAP1L4b, NAP-2, NAP2	http://www.genecards.org/cgi-bin/carddisp.pl?gene=NAP1L4
NAPB	NSF Attachment Protein Beta	SNAP-BETA, SNAPB	http://www.genecards.org/cgi-bin/carddisp.pl?gene=NAPB
NAPG	NSF Attachment Protein Gamma	GAMMASNAP, SNAPG, SNAP-gamma	http://www.genecards.org/cgi-bin/carddisp.pl?gene=NAPG
NBR1	NBR1, Autophagy Cargo Receptor	1A1-3B, IAI3B, MIG19, M17S2, 1A13B, KIAA0049	http://www.genecards.org/cgi-bin/carddisp.pl?gene=NBR1
NCF4	Neutrophil Cytosolic Factor 4	CGD3, NCF, P40PHOX, NCF-4, SH3PXD4, p40-phox	http://www.genecards.org/cgi-bin/carddisp.pl?gene=NCF4
NCKAP1	NCK Associated Protein 1	HEM2, NAP1, p125Nap1, NAP125, KIAA0587	http://www.genecards.org/cgi-bin/carddisp.pl?gene=NCKAP1
NDFIP2	Nedd4 Family Interacting Protein 2	KIAA1165, N4WBP5A	http://www.genecards.org/cgi-bin/carddisp.pl?gene=NDFIP2
NDRG2	NDRG Family Member 2	SYLD, KIAA1248	http://www.genecards.org/cgi-bin/carddisp.pl?gene=NDRG2
NDRG4	NDRG Family Member 4	KIAA1180, BDM1, SMAP-8, SMAP8	http://www.genecards.org/cgi-bin/carddisp.pl?gene=NDRG4
NDUFA13	NADH:Ubiquinone Oxidoreductase Subunit A13	B16.6, CDA016, CGI-39, CI-B16.6, GRIM-19, GRIM19	http://www.genecards.org/cgi-bin/carddisp.pl?gene=NDUFA13
NDUFV1	NADH:Ubiquinone Oxidoreductase Core Subunit V1	CI-51K, CI51KD, CI-51kD, UQOR1	http://www.genecards.org/cgi-bin/carddisp.pl?gene=NDUFV1
NEBL	Nebulette	LIM-nebulette, nebulette, LASP2, LNEBL	http://www.genecards.org/cgi-bin/carddisp.pl?gene=NEBL
NECAB1	N-Terminal EF-Hand Calcium Binding Protein 1	EFCBP1, STIP-1	http://www.genecards.org/cgi-bin/carddisp.pl?gene=NECAB1
NEDD4L	Neural Precursor Cell Expressed, Developmentally Down-Regulated 4-Like, E3 Ubiquitin Protein Ligase	NEDD4.2, KIAA0439, NEDL3, Nedd4-2, PVNH7, RSP5, hNEDD4-2	http://www.genecards.org/cgi-bin/carddisp.pl?gene=NEDD4L
NEXN	Nexilin F-Actin Binding Protein	CMH20, NELIN, nexilin	http://www.genecards.org/cgi-bin/carddisp.pl?gene=NEXN
NFIX	Nuclear Factor I X	NFI-X, NF-I/X, CTF, NF1-X, MRSHSS, SOTOS2, NF1A	http://www.genecards.org/cgi-bin/carddisp.pl?gene=NFIX
NKIRAS2	NFKB Inhibitor Interacting Ras Like 2	KBRAS2, KappaB-Ras2	http://www.genecards.org/cgi-bin/carddisp.pl?gene=NKIRAS2
NLGN3	Neuroligin 3	HNL3, neuroligin-3, KIAA1480, NL3	http://www.genecards.org/cgi-bin/carddisp.pl?gene=NLGN3
NPTX1	Neuronal Pentraxin 1	NP-I, NP1	http://www.genecards.org/cgi-bin/carddisp.pl?gene=NPTX1
NRXN2	Neurexin 2	neurexin-2-beta, KIAA0921, Neurexin-2-alpha	http://www.genecards.org/cgi-bin/carddisp.pl?gene=NRXN2
NT5C2	5'-Nucleotidase, Cytosolic II	SPG45, GMP, SPG65, cN-II, NT5B, NT5CP, PNT5	http://www.genecards.org/cgi-bin/carddisp.pl?gene=NT5C2
OGFRL1	Opioid Growth Factor Receptor Like 1	dJ331H24.1	http://www.genecards.org/cgi-bin/carddisp.pl?gene=OGFRL1
OXR1	Oxidation Resistance 1	TLDC3, Nbla00307	http://www.genecards.org/cgi-bin/carddisp.pl?gene=OXR1
PA2G4	Proliferation-Associated 2G4	HG4-1, p38-2G4, EBP1	http://www.genecards.org/cgi-bin/carddisp.pl?gene=PA2G4
PABPC1	Poly(A) Binding Protein Cytoplasmic 1	PAB1, PABP, PABPL1, PABP1, PABPC2, PABP-1	http://www.genecards.org/cgi-bin/carddisp.pl?gene=PABPC1
PAFAH1B1	Platelet Activating Factor Acetylhydrolase 1b Regulatory Subunit 1	MDCR, PAFAH, NudF, LIS2, MDS, LIS-1, LIS1, PAFAHA, lissencephaly-1	http://www.genecards.org/cgi-bin/carddisp.pl?gene=PAFAH1B1
PALD1	Phosphatase Domain Containing, Paladin 1	palladin, paladin, KIAA1274, PALD	http://www.genecards.org/cgi-bin/carddisp.pl?gene=PALD1
PALMD	Palmdelphin	palmdelphin, C1orf11, PALML	http://www.genecards.org/cgi-bin/carddisp.pl?gene=PALMD
PANX1	Pannexin 1	PX1, UNQ2529, pannexin-1, innexin, MRS1	http://www.genecards.org/cgi-bin/carddisp.pl?gene=PANX1
PAQR6	Progestin And AdipoQ Receptor Family Member 6	PRdelta	http://www.genecards.org/cgi-bin/carddisp.pl?gene=PAQR6
PARD3	Par-3 Family Cell Polarity Regulator	Baz, PAR3alpha, PARD3A, PPP1R118, SE2-5L16, SE2-5LT1, SE2-5T2, bazooka, PAR-3, PAR3A, ASIP, PAR3, PAR3-alpha, PARD-3	http://www.genecards.org/cgi-bin/carddisp.pl?gene=PARD3
PBLD	Phenazine Biosynthesis Like Protein Domain Containing	HEL-S-306, MAWBP, MAWDBP	http://www.genecards.org/cgi-bin/carddisp.pl?gene=PBLD
PCDH10	Protocadherin 10	protocadherin-10, PCDH19, KIAA1400, OL-PCDH	http://www.genecards.org/cgi-bin/carddisp.pl?gene=PCDH10
PCDH8	Protocadherin 8	Arcadlin, PAPC, protocadherin-8	http://www.genecards.org/cgi-bin/carddisp.pl?gene=PCDH8
PCDH9	Protocadherin 9	protocadherin-9	http://www.genecards.org/cgi-bin/carddisp.pl?gene=PCDH9
PCDHAC1	Protocadherin Alpha Subfamily C, 1	PCDH-ALPHA-C1	http://www.genecards.org/cgi-bin/carddisp.pl?gene=PCDHAC1
PCDHAC2	Protocadherin Alpha Subfamily C, 2	PCDH-ALPHA-C2	http://www.genecards.org/cgi-bin/carddisp.pl?gene=PCDHAC2
PCED1A	PC-Esterase Domain Containing 1A	bA12M19.1, C20orf81, FAM113A	http://www.genecards.org/cgi-bin/carddisp.pl?gene=PCED1A
PCLO	Piccolo Presynaptic Cytomatrix Protein	PCH3, aczonin, KIAA0559, ACZ	http://www.genecards.org/cgi-bin/carddisp.pl?gene=PCLO
PCSK2	Proprotein Convertase Subtilisin/Kexin Type 2	SPC2, NEC2, PC2, NEC-2	http://www.genecards.org/cgi-bin/carddisp.pl?gene=PCSK2
PDCL3	Phosducin Like 3	PHLP2A, PHLP3, VIAF, phPL3, HTPHLP, VIAF-1, VIAF1	http://www.genecards.org/cgi-bin/carddisp.pl?gene=PDCL3
PDE12	Phosphodiesterase 12	2-PDE, 2-phosphodiesterase	http://www.genecards.org/cgi-bin/carddisp.pl?gene=PDE12
PDE2A	Phosphodiesterase 2A	PED2A4, PDE2A1, cGSPDE, CGS-PDE	http://www.genecards.org/cgi-bin/carddisp.pl?gene=PDE2A
PDE4A	Phosphodiesterase 4A	PDE46, DPDE2, PDE4	http://www.genecards.org/cgi-bin/carddisp.pl?gene=PDE4A
PDE4C	Phosphodiesterase 4C	DPDE1, PDE21	http://www.genecards.org/cgi-bin/carddisp.pl?gene=PDE4C
PDHA1	Pyruvate Dehydrogenase E1 Alpha 1 Subunit	PDHAD, PDHCE1A, PDHA, PHE1A	http://www.genecards.org/cgi-bin/carddisp.pl?gene=PDHA1
PDHX	Pyruvate Dehydrogenase Complex Component X	DLDBP, OPDX, PDHXD, E3BP, PDX1, proX	http://www.genecards.org/cgi-bin/carddisp.pl?gene=PDHX
PDPK1	3-Phosphoinositide Dependent Protein Kinase 1	PDPK2, PDPK2P, PRO0461, hPDK1, PDK1	http://www.genecards.org/cgi-bin/carddisp.pl?gene=PDPK1
PDPR	Pyruvate Dehydrogenase Phosphatase Regulatory Subunit	PDPr, KIAA1990, PDP3	http://www.genecards.org/cgi-bin/carddisp.pl?gene=PDPR
PDXK	Pyridoxal Kinase	HEL-S-1a, PRED79, C21orf124, C21orf97, PKH, PNK	http://www.genecards.org/cgi-bin/carddisp.pl?gene=PDXK
PEX14	Peroxisomal Biogenesis Factor 14	PBD13A, NAPP2, Pex14p, dJ734G22.2, peroxin-14	http://www.genecards.org/cgi-bin/carddisp.pl?gene=PEX14
PEX19	Peroxisomal Biogenesis Factor 19	PXMP1, peroxin-19, PMP1, PMPI, PBD12A, D1S2223E, PXF, HK33	http://www.genecards.org/cgi-bin/carddisp.pl?gene=PEX19
PFDN5	Prefoldin Subunit 5	MM1, PFD5, MM-1	http://www.genecards.org/cgi-bin/carddisp.pl?gene=PFDN5
PFKP	Phosphofructokinase, Platelet	phosphohexokinase, ATP-PFK, PFKF, PFK-P, PFK-C	http://www.genecards.org/cgi-bin/carddisp.pl?gene=PFKP
PFN2	Profilin 2	D3S1319E, PFL, profilin-2	http://www.genecards.org/cgi-bin/carddisp.pl?gene=PFN2
PGBD4	PiggyBac Transposable Element Derived 4		http://www.genecards.org/cgi-bin/carddisp.pl?gene=PGBD4
PHF13	PHD Finger Protein 13	PHF5, SPOC1	http://www.genecards.org/cgi-bin/carddisp.pl?gene=PHF13
PHF14	PHD Finger Protein 14	KIAA0783	http://www.genecards.org/cgi-bin/carddisp.pl?gene=PHF14
PHF24	PHD Finger Protein 24	KIAA1045	http://www.genecards.org/cgi-bin/carddisp.pl?gene=PHF24
PHOSPHO1	Phosphoethanolamine/Phosphocholine Phosphatase		http://www.genecards.org/cgi-bin/carddisp.pl?gene=PHOSPHO1
PHYH	Phytanoyl-CoA 2-Hydroxylase	LN1, LNAP1, PHYH1, RD, PhyH, PAHX	http://www.genecards.org/cgi-bin/carddisp.pl?gene=PHYH
PI4KA	Phosphatidylinositol 4-Kinase Alpha	pi4K230, PI4K-ALPHA, PMGYCHA, PIK4CA, PIK4	http://www.genecards.org/cgi-bin/carddisp.pl?gene=PI4KA
PIAS4	Protein Inhibitor Of Activated STAT 4	Piasg, PIASY, ZMIZ6, PIAS-gamma	http://www.genecards.org/cgi-bin/carddisp.pl?gene=PIAS4
PIK3IP1	Phosphoinositide-3-Kinase Interacting Protein 1	hHGFL(S), HGFL	http://www.genecards.org/cgi-bin/carddisp.pl?gene=PIK3IP1
PIK3R2	Phosphoinositide-3-Kinase Regulatory Subunit 2	MPPH, MPPH1, P85B, p85, p85-BETA	http://www.genecards.org/cgi-bin/carddisp.pl?gene=PIK3R2
PIM1	Pim-1 Proto-Oncogene, Serine/Threonine Kinase	PIM	http://www.genecards.org/cgi-bin/carddisp.pl?gene=PIM1
PIP4K2A	Phosphatidylinositol-5-Phosphate 4-Kinase Type 2 Alpha	1-phosphatidylinositol-4-phosphate-5-kinase, PI5P4KA, PIP5KII-alpha, PIP5KIIA, PIP5KIIalpha, PIPK, PIP5K2A, PIP5K2, PIP4KII-alpha, PIP5KIII	http://www.genecards.org/cgi-bin/carddisp.pl?gene=PIP4K2A
PITPNA	Phosphatidylinositol Transfer Protein Alpha	HEL-S-36, PI-TPalpha, VIB1A, PITPN, PI-TP-alpha	http://www.genecards.org/cgi-bin/carddisp.pl?gene=PITPNA
PLA1A	Phospholipase A1 Member A	NMD, PS-PLA1, PSPLA1	http://www.genecards.org/cgi-bin/carddisp.pl?gene=PLA1A
PLCB1	Phospholipase C Beta 1	1-phosphatidyl-D-myo-inositol-4,5-bisphosphate, EIEE12, PI-PLC, PLC154, PLCB1A, PLCB1B, inositoltrisphosphohydrolase, KIAA0581, PLC-154, PLC-I, PLC-beta-1	http://www.genecards.org/cgi-bin/carddisp.pl?gene=PLCB1
PLCH1	Phospholipase C Eta 1	PLCL3, KIAA1069, PLC-eta-1, PLC-L3	http://www.genecards.org/cgi-bin/carddisp.pl?gene=PLCH1
PLCH2	Phospholipase C Eta 2	PLCeta2, PLCL4, KIAA0450, PLC-L4, PLC-eta2	http://www.genecards.org/cgi-bin/carddisp.pl?gene=PLCH2
PLCL2	Phospholipase C Like 2	PLCE2, KIAA1092, PLC-L(2), PLC-L2, PLC-epsilon-2	http://www.genecards.org/cgi-bin/carddisp.pl?gene=PLCL2
PLEKHA6	Pleckstrin Homology Domain Containing A6	KIAA0969, PEPP-3, PEPP3	http://www.genecards.org/cgi-bin/carddisp.pl?gene=PLEKHA6
PLP2	Proteolipid Protein 2	A4LSB, A4	http://www.genecards.org/cgi-bin/carddisp.pl?gene=PLP2
PLXNB2	Plexin B2	Nbla00445, PLEXB2, dJ402G11.3, plexin-B2, KIAA0315, MM1	http://www.genecards.org/cgi-bin/carddisp.pl?gene=PLXNB2
POLR2D	RNA Polymerase II Subunit D	RPB16, HSRBP4, HSRPB4, RBP4	http://www.genecards.org/cgi-bin/carddisp.pl?gene=POLR2D
PPFIA3	PTPRF Interacting Protein Alpha 3	liprin, liprin-alpha-3, LPNA3, KIAA0654	http://www.genecards.org/cgi-bin/carddisp.pl?gene=PPFIA3
PPIB	Peptidylprolyl Isomerase B	S-cyclophilin, B, OI9, HEL-S-39, CYP-S1, CYPB, SCYLP	http://www.genecards.org/cgi-bin/carddisp.pl?gene=PPIB
PPP1CB	Protein Phosphatase 1 Catalytic Subunit Beta	HEL-S-80p, NSLH2, PP1B, PP1beta, PP-1B, PPP1CD	http://www.genecards.org/cgi-bin/carddisp.pl?gene=PPP1CB
PPP1R1A	Protein Phosphatase 1 Regulatory Inhibitor Subunit 1A	I1, inhibitor-1, I-1, IPP-1, IPP1	http://www.genecards.org/cgi-bin/carddisp.pl?gene=PPP1R1A
PPP1R1B	Protein Phosphatase 1 Regulatory Inhibitor Subunit 1B	DARPP-32, DARPP32	http://www.genecards.org/cgi-bin/carddisp.pl?gene=PPP1R1B
PPP2R1B	Protein Phosphatase 2 Scaffold Subunit Abeta	PP2A-Abeta, PR65B, PP2A-A-beta	http://www.genecards.org/cgi-bin/carddisp.pl?gene=PPP2R1B
PPP2R2C	Protein Phosphatase 2 Regulatory Subunit Bgamma	B55-GAMMA, B55gamma, IMYPNO, PR52, PR55G, IMYPNO1	http://www.genecards.org/cgi-bin/carddisp.pl?gene=PPP2R2C
PPP3CA	Protein Phosphatase 3 Catalytic Subunit Alpha	CALNA1, CCN1, CNA1, IECEE, IECEE1, PPP2B, CALN, CALNA, CNA	http://www.genecards.org/cgi-bin/carddisp.pl?gene=PPP3CA
PPP4R3A	Protein Phosphatase 4 Regulatory Subunit 3A	FLFL1, MSTP033, PP4R3, smk-1, smk1, KIAA2010, SMEK1, PP4R3A	http://www.genecards.org/cgi-bin/carddisp.pl?gene=PPP4R3A
PRADC1	Protease Associated Domain Containing 1	PAP21, C2orf7, hPAP21	http://www.genecards.org/cgi-bin/carddisp.pl?gene=PRADC1
PRDX2	Peroxiredoxin 2	peroxiredoxin-2, TPX1, PTX1, PRX2, PRXII, torin, TDPX1, NKEF-B, NKEFB, PRP, TSA, HEL-S-2a	http://www.genecards.org/cgi-bin/carddisp.pl?gene=PRDX2
PRF1	Perforin 1	P1, Perforin, Cytolysin, perforin-1, HPLH2, PFP	http://www.genecards.org/cgi-bin/carddisp.pl?gene=PRF1
PRKAR1A	Protein Kinase CAMP-Dependent Type I Regulatory Subunit Alpha	ACRDYS1, ADOHR, CAR, CNC, CNC1, PPNAD1, PRKAR1, TSE1, PKR1	http://www.genecards.org/cgi-bin/carddisp.pl?gene=PRKAR1A
PRKAR1B	Protein Kinase CAMP-Dependent Type I Regulatory Subunit Beta	PRKAR1	http://www.genecards.org/cgi-bin/carddisp.pl?gene=PRKAR1B
PRKAR2A	Protein Kinase CAMP-Dependent Type II Regulatory Subunit Alpha	PRKAR2, PKR2	http://www.genecards.org/cgi-bin/carddisp.pl?gene=PRKAR2A
PROSER1	Proline And Serine Rich 1	C13orf23, KIAA2032	http://www.genecards.org/cgi-bin/carddisp.pl?gene=PROSER1
PRPS1	Phosphoribosyl Pyrophosphate Synthetase 1	CMTX5, DFNX1, PRSI, DFN2, PPRibP, PRS-I, ARTS	http://www.genecards.org/cgi-bin/carddisp.pl?gene=PRPS1
PRRC2A	Proline Rich Coiled-Coil 2A	D6S51, D6S51E, BAT2, G2	http://www.genecards.org/cgi-bin/carddisp.pl?gene=PRRC2A
PRUNE2	Prune Homolog 2	olfaxin, KIAA0367, C9orf65, BMCC1, BNIPXL	http://www.genecards.org/cgi-bin/carddisp.pl?gene=PRUNE2
PSAP	Prosaposin	prosaposin, GLBA, SAP1	http://www.genecards.org/cgi-bin/carddisp.pl?gene=PSAP
PSAT1	Phosphoserine Aminotransferase 1	PSA, PSAT, EPIP, NLS2, PSATD	http://www.genecards.org/cgi-bin/carddisp.pl?gene=PSAT1
PSMA5	Proteasome Subunit Alpha 5	ZETA, PSC5	http://www.genecards.org/cgi-bin/carddisp.pl?gene=PSMA5
PSMD1	Proteasome 26S Subunit, Non-ATPase 1	P112, Rpn2, S1	http://www.genecards.org/cgi-bin/carddisp.pl?gene=PSMD1
PTGES3	Prostaglandin E Synthase 3	P23, cPGES, TEBP	http://www.genecards.org/cgi-bin/carddisp.pl?gene=PTGES3
PTGFRN	Prostaglandin F2 Receptor Inhibitor	CD315, SMAP-6, CD9P1, EWIF, KIAA1436, CD9P-1, EWI-F, FPRP	http://www.genecards.org/cgi-bin/carddisp.pl?gene=PTGFRN
PTMA	Prothymosin Alpha	prothymosin-I+/-, TMSA, prothymosin-Î±	http://www.genecards.org/cgi-bin/carddisp.pl?gene=PTMA
PTN	Pleiotrophin	HARP, HBGF8, HBNF, pleiotrophin, NEGF1, HBNF1, HB-GAM, HBBM, HBGF-8, HBNF-1, OSF-1	http://www.genecards.org/cgi-bin/carddisp.pl?gene=PTN
PTPRD	Protein Tyrosine Phosphatase, Receptor Type D	HPTP, HPTPD, HPTPDELTA, PTPD, RPTPDELTA, R-PTP-delta	http://www.genecards.org/cgi-bin/carddisp.pl?gene=PTPRD
PTPRF	Protein Tyrosine Phosphatase, Receptor Type F	BNAH2, LCA-homolog, LAR	http://www.genecards.org/cgi-bin/carddisp.pl?gene=PTPRF
PTPRN2	Protein Tyrosine Phosphatase, Receptor Type N2	IA-2beta, PTPRP, phogrin, KIAA0387, IAR, ICAAR, R-PTP-N2	http://www.genecards.org/cgi-bin/carddisp.pl?gene=PTPRN2
PTPRO	Protein Tyrosine Phosphatase, Receptor Type O	NPHS6, PTP-OC, PTPROT, GLEPP1, PTP-U2, PTPU2, R-PTP-O	http://www.genecards.org/cgi-bin/carddisp.pl?gene=PTPRO
PTX3	Pentraxin 3	TNFAIP5, TSG14, TSG-14	http://www.genecards.org/cgi-bin/carddisp.pl?gene=PTX3
QKI	QKI, KH Domain Containing RNA Binding	QK, QK1, QK3, hqkI, HKQ, Hqk	http://www.genecards.org/cgi-bin/carddisp.pl?gene=QKI
RAB11B	RAB11B, Member RAS Oncogene Family	YPT3, H-YPT3, NDAGSCW	http://www.genecards.org/cgi-bin/carddisp.pl?gene=RAB11B
RAB18	RAB18, Member RAS Oncogene Family	RAB18LI1, WARBM3	http://www.genecards.org/cgi-bin/carddisp.pl?gene=RAB18
RAB4B	RAB4B, Member RAS Oncogene Family		http://www.genecards.org/cgi-bin/carddisp.pl?gene=RAB4B
RAB6A	RAB6A, Member RAS Oncogene Family	RAB6, Rab-6	http://www.genecards.org/cgi-bin/carddisp.pl?gene=RAB6A
RAB6B	RAB6B, Member RAS Oncogene Family		http://www.genecards.org/cgi-bin/carddisp.pl?gene=RAB6B
RAB7A	RAB7A, Member RAS Oncogene Family	PRO2706, RAB7	http://www.genecards.org/cgi-bin/carddisp.pl?gene=RAB7A
RABGEF1	RAB Guanine Nucleotide Exchange Factor 1	rabex-5, RABEX5, RAP1	http://www.genecards.org/cgi-bin/carddisp.pl?gene=RABGEF1
RABGGTB	Rab Geranylgeranyltransferase Subunit Beta	GGTB, GGTase-II-beta	http://www.genecards.org/cgi-bin/carddisp.pl?gene=RABGGTB
RALYL	RALY RNA Binding Protein Like	hRALYL, HNRPCL3	http://www.genecards.org/cgi-bin/carddisp.pl?gene=RALYL
RAN	RAN, Member RAS Oncogene Family	OK/SW-cl.81, RanGTPase, TC4, ARA24, Gsp1	http://www.genecards.org/cgi-bin/carddisp.pl?gene=RAN
RBM27	RNA Binding Motif Protein 27	ARRS1, Psc1, ZC3H18, ZC3H20, KIAA1311	http://www.genecards.org/cgi-bin/carddisp.pl?gene=RBM27
RBM5	RNA Binding Motif Protein 5	RMB5, LUCA15, H37, G15	http://www.genecards.org/cgi-bin/carddisp.pl?gene=RBM5
RBP7	Retinol Binding Protein 7	CRABP-IV, CRABP4, CRBP4, CRBPIV	http://www.genecards.org/cgi-bin/carddisp.pl?gene=RBP7
RCAN3	RCAN Family Member 3	calcipressin-3, RCN3, hRCN3, MCIP3, DSCR1L2	http://www.genecards.org/cgi-bin/carddisp.pl?gene=RCAN3
RFC1	Replication Factor C Subunit 1	MHCBFB, PO-GA, RECC1, RFC, A1, RFC140	http://www.genecards.org/cgi-bin/carddisp.pl?gene=RFC1
RHBDL1	Rhomboid Like 1	RHBDL, RRP	http://www.genecards.org/cgi-bin/carddisp.pl?gene=RHBDL1
RHOA	Ras Homolog Family Member A	RHOH12, ARH12, ARHA, h12, RHO12	http://www.genecards.org/cgi-bin/carddisp.pl?gene=RHOA
RIF1	Replication Timing Regulatory Factor 1		http://www.genecards.org/cgi-bin/carddisp.pl?gene=RIF1
RIMS1	Regulating Synaptic Membrane Exocytosis 1	RAB3IP2, KIAA0340, RIM1, RIM, CORD7	http://www.genecards.org/cgi-bin/carddisp.pl?gene=RIMS1
RIMS4	Regulating Synaptic Membrane Exocytosis 4	C20orf190, RIM4-gamma, RIM4gamma, RIM4, RIM-4	http://www.genecards.org/cgi-bin/carddisp.pl?gene=RIMS4
RMDN3	Regulator Of Microtubule Dynamics 3	PTPIP51, hRMD-3, RMD-3, FAM82A2, FAM82C, RMD3	http://www.genecards.org/cgi-bin/carddisp.pl?gene=RMDN3
RND1	Rho Family GTPase 1	RHOS, Rnd1, ARHS, RHO6	http://www.genecards.org/cgi-bin/carddisp.pl?gene=RND1
RNF126	Ring Finger Protein 126		http://www.genecards.org/cgi-bin/carddisp.pl?gene=RNF126
RNF208	Ring Finger Protein 208		http://www.genecards.org/cgi-bin/carddisp.pl?gene=RNF208
ROBO3	Roundabout Guidance Receptor 3	HGPPS, HGPS, HGPPS1, RBIG1, RIG1	http://www.genecards.org/cgi-bin/carddisp.pl?gene=ROBO3
ROCK1	Rho Associated Coiled-Coil Containing Protein Kinase 1	ROCK-I, p160ROCK	http://www.genecards.org/cgi-bin/carddisp.pl?gene=ROCK1
RORC	RAR Related Orphan Receptor C	RZR-GAMMA, TOR, IMD42, RORG, RZRG, NR1F3	http://www.genecards.org/cgi-bin/carddisp.pl?gene=RORC
RPL21	Ribosomal Protein L21	L21, HYPT12	http://www.genecards.org/cgi-bin/carddisp.pl?gene=RPL21
RPL22	Ribosomal Protein L22	HBP15, HBP15/L22, L22, EAP	http://www.genecards.org/cgi-bin/carddisp.pl?gene=RPL22
RPL5	Ribosomal Protein L5	L5, MSTP030, PPP1R135, uL18	http://www.genecards.org/cgi-bin/carddisp.pl?gene=RPL5
RPRD2	Regulation Of Nuclear Pre-MRNA Domain Containing 2	HSPC099, KIAA0460	http://www.genecards.org/cgi-bin/carddisp.pl?gene=RPRD2
RPS17	Ribosomal Protein S17	DBA4, RPS17L1, RPS17L2, S17, RPS17L	http://www.genecards.org/cgi-bin/carddisp.pl?gene=RPS17
RPS27A	Ribosomal Protein S27a	CEP80, HEL112, UBC, UBCEP80, ubiquitin-CEP80, UBA80, UBCEP1, S27A	http://www.genecards.org/cgi-bin/carddisp.pl?gene=RPS27A
RPS9	Ribosomal Protein S9	S9	http://www.genecards.org/cgi-bin/carddisp.pl?gene=RPS9
RTF2	Replication Termination Factor 2	C20orf43, RTFDC1, SHUJUN-3, HSPC164, CDAO5	http://www.genecards.org/cgi-bin/carddisp.pl?gene=RTF2
RTN3	Reticulon 3	reticulon-3, RTN3-A1, ASYIP, HAP, NSPL2, NSPLII	http://www.genecards.org/cgi-bin/carddisp.pl?gene=RTN3
RTN4IP1	Reticulon 4 Interacting Protein 1	OPA10, NIMP	http://www.genecards.org/cgi-bin/carddisp.pl?gene=RTN4IP1
RUSC1	RUN And SH3 Domain Containing 1	NESCA	http://www.genecards.org/cgi-bin/carddisp.pl?gene=RUSC1
RWDD4	RWD Domain Containing 4	FAM28A, RWDD4A	http://www.genecards.org/cgi-bin/carddisp.pl?gene=RWDD4
RYR2	Ryanodine Receptor 2	ARVD2, RyR2, hRYR-2, RYR-2, RyR, ARVC2, VTSIP	http://www.genecards.org/cgi-bin/carddisp.pl?gene=RYR2
RYR3	Ryanodine Receptor 3	RyR3, HBRR, RYR-3	http://www.genecards.org/cgi-bin/carddisp.pl?gene=RYR3
S100B	S100 Calcium Binding Protein B	S100, S100beta, S100-B, NEF	http://www.genecards.org/cgi-bin/carddisp.pl?gene=S100B
SAFB	Scaffold Attachment Factor B	HET, SAF-B, SAF-B1, SAFB1, SAB-B1, HAP	http://www.genecards.org/cgi-bin/carddisp.pl?gene=SAFB
SCARA3	Scavenger Receptor Class A Member 3	CSR, MSRL1, APC7, CSR1, MSLR1	http://www.genecards.org/cgi-bin/carddisp.pl?gene=SCARA3
SCFD1	Sec1 Family Domain Containing 1	C14orf163, KIAA0917, Sly1p, STXBP1L2, RA410, SLY1	http://www.genecards.org/cgi-bin/carddisp.pl?gene=SCFD1
SCG2	Secretogranin II	CHGC, SgII, secretoneurin, Chromogranin-C, secretogranin-2, EM66, SN	http://www.genecards.org/cgi-bin/carddisp.pl?gene=SCG2
SCG3	Secretogranin III	SGIII, secretogranin-3	http://www.genecards.org/cgi-bin/carddisp.pl?gene=SCG3
SCN2A	Sodium Voltage-Gated Channel Alpha Subunit 2	BFIC3, BFIS3, BFNIS, EIEE11, HBA, HBSCI, HBSCII, Na(v)1.2, Nav1.2, SCN2A1, SCN2A2, NAC2	http://www.genecards.org/cgi-bin/carddisp.pl?gene=SCN2A
SCN4B	Sodium Voltage-Gated Channel Beta Subunit 4	ATFB17, LQT10, Navbeta4	http://www.genecards.org/cgi-bin/carddisp.pl?gene=SCN4B
SCUBE3	Signal Peptide, CUB Domain And EGF Like Domain Containing 3	CEGF3	http://www.genecards.org/cgi-bin/carddisp.pl?gene=SCUBE3
SDHA	Succinate Dehydrogenase Complex Flavoprotein Subunit A	FP, CMD1GG, PGL5, SDHF, SDH2, SDH1	http://www.genecards.org/cgi-bin/carddisp.pl?gene=SDHA
SEM1	SEM1, 26S Proteasome Complex Subunit	ECD, SHSF1, Shfdg1, SHFD1, C7orf76, SHFM1, DSS1	http://www.genecards.org/cgi-bin/carddisp.pl?gene=SEM1
SEMA3E	Semaphorin 3E	M-SEMAH, M-SemaK, coll-5, semaphorin-3E, SEMAH, KIAA0331	http://www.genecards.org/cgi-bin/carddisp.pl?gene=SEMA3E
SEMA3G	Semaphorin 3G	sem2, semaphorin-3G	http://www.genecards.org/cgi-bin/carddisp.pl?gene=SEMA3G
SEMA6D	Semaphorin 6D	semaphorin-6D, KIAA1479	http://www.genecards.org/cgi-bin/carddisp.pl?gene=SEMA6D
SENP5	SUMO Specific Peptidase 5		http://www.genecards.org/cgi-bin/carddisp.pl?gene=SENP5
SERF2	Small EDRK-Rich Factor 2	4F5REL, H4F5REL, HsT17089, FAM2C	http://www.genecards.org/cgi-bin/carddisp.pl?gene=SERF2
SERINC2	Serine Incorporator 2	TDE2L, PRO0899, TDE2, FKSG84	http://www.genecards.org/cgi-bin/carddisp.pl?gene=SERINC2
SERPINA1	Serpin Family A Member 1	A1AT, PI1, PRO2275, alpha-1-antiproteinase, alpha-1-antitrypsin, alpha1AT, nNIF, PI, AAT, A1A	http://www.genecards.org/cgi-bin/carddisp.pl?gene=SERPINA1
SET	SET Nuclear Proto-Oncogene	2PP2A, I2PP2A, IPP2A2, TAF-IBETA, I-2PP2A, IGAAD, PHAPII, TAF-I	http://www.genecards.org/cgi-bin/carddisp.pl?gene=SET
SEZ6L2	Seizure Related 6 Homolog Like 2	PSK, BSRPA, PSK-1	http://www.genecards.org/cgi-bin/carddisp.pl?gene=SEZ6L2
SF3A1	Splicing Factor 3a Subunit 1	PRPF21, SF3A120, PRP21, SAP114	http://www.genecards.org/cgi-bin/carddisp.pl?gene=SF3A1
SFN	Stratifin	stratifin, HME1, YWHAS	http://www.genecards.org/cgi-bin/carddisp.pl?gene=SFN
SH2D3C	SH2 Domain Containing 3C	SHEP1, NSP3, CHAT, PRO34088	http://www.genecards.org/cgi-bin/carddisp.pl?gene=SH2D3C
SH3D19	SH3 Domain Containing 19	EVE1, Eve-1, Kryn, SH3P19, EBP	http://www.genecards.org/cgi-bin/carddisp.pl?gene=SH3D19
SH3GL2	SH3 Domain Containing GRB2 Like 2, Endophilin A1	endophilin-1, SH3P4, EEN-B1, SH3D2A, endophilin-A1, CNSA2	http://www.genecards.org/cgi-bin/carddisp.pl?gene=SH3GL2
SH3TC2	SH3 Domain And Tetratricopeptide Repeats 2	CMT4C, MNMN, KIAA1985	http://www.genecards.org/cgi-bin/carddisp.pl?gene=SH3TC2
SHISA7	Shisa Family Member 7		http://www.genecards.org/cgi-bin/carddisp.pl?gene=SHISA7
SHISA9	Shisa Family Member 9	CKAMP44	http://www.genecards.org/cgi-bin/carddisp.pl?gene=SHISA9
SLC10A1	Solute Carrier Family 10 Member 1	NTCP	http://www.genecards.org/cgi-bin/carddisp.pl?gene=SLC10A1
SLC17A7	Solute Carrier Family 17 Member 7	BNPI, VGLUT1	http://www.genecards.org/cgi-bin/carddisp.pl?gene=SLC17A7
SLC1A2	Solute Carrier Family 1 Member 2	EIEE41, GLT-1, HBGT, GLT1, EAAT2	http://www.genecards.org/cgi-bin/carddisp.pl?gene=SLC1A2
SLC20A2	Solute Carrier Family 20 Member 2	IBGC1, IBGC3, PIT-2, RAM1, Ram-1, MLVAR, GLVR2, Pit2, hPit2, GLVR-2	http://www.genecards.org/cgi-bin/carddisp.pl?gene=SLC20A2
SLC24A2	Solute Carrier Family 24 Member 2	NCKX2	http://www.genecards.org/cgi-bin/carddisp.pl?gene=SLC24A2
SLC24A4	Solute Carrier Family 24 Member 4	AI2A5, SHEP6, SLC24A2, NCKX4	http://www.genecards.org/cgi-bin/carddisp.pl?gene=SLC24A4
SLC25A1	Solute Carrier Family 25 Member 1	D2L2AD, SEA, SLC20A3, CTP	http://www.genecards.org/cgi-bin/carddisp.pl?gene=SLC25A1
SLC25A36	Solute Carrier Family 25 Member 36	PNC2	http://www.genecards.org/cgi-bin/carddisp.pl?gene=SLC25A36
SLC29A4	Solute Carrier Family 29 Member 4	hENT4, ENT4, PMAT	http://www.genecards.org/cgi-bin/carddisp.pl?gene=SLC29A4
SLC38A10	Solute Carrier Family 38 Member 10	PP1744	http://www.genecards.org/cgi-bin/carddisp.pl?gene=SLC38A10
SLC38A5	Solute Carrier Family 38 Member 5	pp7194, JM24, SN2, SNAT5	http://www.genecards.org/cgi-bin/carddisp.pl?gene=SLC38A5
SLC48A1	Solute Carrier Family 48 Member 1	HRG-1, HRG1, hHRG-1	http://www.genecards.org/cgi-bin/carddisp.pl?gene=SLC48A1
SLC6A11	Solute Carrier Family 6 Member 11	GAT4, GABT3, GAT-3, GAT3	http://www.genecards.org/cgi-bin/carddisp.pl?gene=SLC6A11
SLC6A13	Solute Carrier Family 6 Member 13	GAT3, GAT-2, GAT2	http://www.genecards.org/cgi-bin/carddisp.pl?gene=SLC6A13
SLC6A17	Solute Carrier Family 6 Member 17	MRT48, NTT4	http://www.genecards.org/cgi-bin/carddisp.pl?gene=SLC6A17
SLC7A6OS	Solute Carrier Family 7 Member 6 Opposite Strand		http://www.genecards.org/cgi-bin/carddisp.pl?gene=SLC7A6OS
SLC7A7	Solute Carrier Family 7 Member 7	LAT3, LPI, MOP-2, Y+LAT1, y+LAT-1	http://www.genecards.org/cgi-bin/carddisp.pl?gene=SLC7A7
SLCO2B1	Solute Carrier Organic Anion Transporter Family Member 2B1	SLC21A9, KIAA0880, OATPRP2, OATP-B, OATP-RP2, OATP2B1, OATPB	http://www.genecards.org/cgi-bin/carddisp.pl?gene=SLCO2B1
SLMAP	Sarcolemma Associated Protein	KIAA1601, SLAP	http://www.genecards.org/cgi-bin/carddisp.pl?gene=SLMAP
SMARCA4	SWI/SNF Related, Matrix Associated, Actin Dependent Regulator Of Chromatin, Subfamily A, Member 4	SNF2, RTPS2, SWI2, SNF2LB, hSNF2b, BAF190, CSS4, MRD16, SNF2B, SNF2L4, BAF190A, BRG1, SNF2-beta	http://www.genecards.org/cgi-bin/carddisp.pl?gene=SMARCA4
SMIM18	Small Integral Membrane Protein 18		http://www.genecards.org/cgi-bin/carddisp.pl?gene=SMIM18
SMNDC1	Survival Motor Neuron Domain Containing 1	TDRD16C, SMNR, SPF30	http://www.genecards.org/cgi-bin/carddisp.pl?gene=SMNDC1
SMURF1	SMAD Specific E3 Ubiquitin Protein Ligase 1	KIAA1625, hSMURF1	http://www.genecards.org/cgi-bin/carddisp.pl?gene=SMURF1
SMYD2	SET And MYND Domain Containing 2	ZMYND14, HSKM-B, KMT3C	http://www.genecards.org/cgi-bin/carddisp.pl?gene=SMYD2
SNAP25	Synaptosome Associated Protein 25	CMS18, RIC4, RIC-4, SEC9, SNAP, bA416N4.2, dJ1068F16.2, SNAP-25, SUP	http://www.genecards.org/cgi-bin/carddisp.pl?gene=SNAP25
SNAPC5	Small Nuclear RNA Activating Complex Polypeptide 5	SNAP19	http://www.genecards.org/cgi-bin/carddisp.pl?gene=SNAPC5
SNCB	Synuclein Beta	I(2)-synuclein, beta-synuclein, Î²-synuclein	http://www.genecards.org/cgi-bin/carddisp.pl?gene=SNCB
SNF8	SNF8, ESCRT-II Complex Subunit	Dot3, hVps22, EAP30, VPS22	http://www.genecards.org/cgi-bin/carddisp.pl?gene=SNF8
SNRK	SNF Related Kinase	HSNFRK, KIAA0096, SNFRK	http://www.genecards.org/cgi-bin/carddisp.pl?gene=SNRK
SNRNP27	Small Nuclear Ribonucleoprotein U4/U6.U5 Subunit 27	RY1, 27K, U4/U6.U5-27K	http://www.genecards.org/cgi-bin/carddisp.pl?gene=SNRNP27
SNRPF	Small Nuclear Ribonucleoprotein Polypeptide F	SMF, PBSCF, Sm-F, snRNP-F	http://www.genecards.org/cgi-bin/carddisp.pl?gene=SNRPF
SNX14	Sorting Nexin 14	RGS-PX2, SCAR20	http://www.genecards.org/cgi-bin/carddisp.pl?gene=SNX14
SNX25	Sorting Nexin 25	MSTP043, SBBI31	http://www.genecards.org/cgi-bin/carddisp.pl?gene=SNX25
SNX6	Sorting Nexin 6	MSTP010, TFAF2	http://www.genecards.org/cgi-bin/carddisp.pl?gene=SNX6
SOD1	Superoxide Dismutase 1	hSod1, ALS, ALS1, IPOA, SOD, homodimer, HEL-S-44	http://www.genecards.org/cgi-bin/carddisp.pl?gene=SOD1
SP140	SP140 Nuclear Body Protein	LYSp100, LYSP100-A, LYSP100-B	http://www.genecards.org/cgi-bin/carddisp.pl?gene=SP140
SP3	Sp3 Transcription Factor	SPR2, SPR-2	http://www.genecards.org/cgi-bin/carddisp.pl?gene=SP3
SPA17	Sperm Autoantigenic Protein 17	Sp17-1, CT22, SP17	http://www.genecards.org/cgi-bin/carddisp.pl?gene=SPA17
SPAG9	Sperm Associated Antigen 9	PIG6, JIP4, HLC6, HLC4, PHET, HSS, CT89, HLC-6, JIP-4, JLP, SYD1, KIAA0516, MAPK8IP4	http://www.genecards.org/cgi-bin/carddisp.pl?gene=SPAG9
SPIN1	Spindlin 1	TDRD24, spindlin-1, spindlin1, SPIN, OCR, spindlin	http://www.genecards.org/cgi-bin/carddisp.pl?gene=SPIN1
SPOCK3	SPARC (Osteonectin), Cwcv And Kazal Like Domains Proteoglycan 3	HSAJ1454, TES-3, testican-3, TICN3	http://www.genecards.org/cgi-bin/carddisp.pl?gene=SPOCK3
SPOUT1	SPOUT Domain Containing Methyltransferase 1	CENP32, HSPC109, C9orf114, CENP-32	http://www.genecards.org/cgi-bin/carddisp.pl?gene=SPOUT1
SPTBN2	Spectrin Beta, Non-Erythrocytic 2	GTRAP41, SCAR14, SCA5, KIAA0302	http://www.genecards.org/cgi-bin/carddisp.pl?gene=SPTBN2
SRPRA	SRP Receptor Subunit Alpha	SRPR, DP-alpha, Sralpha, SRP-alpha, DP, SR-alpha	http://www.genecards.org/cgi-bin/carddisp.pl?gene=SRPRA
SRRT	Serrate, RNA Effector Molecule	serrate, ARS2, ASR2	http://www.genecards.org/cgi-bin/carddisp.pl?gene=SRRT
SRSF1	Serine And Arginine Rich Splicing Factor 1	SF2p33, SRp30a, SFRS1, ASF-1, ASF, SF2	http://www.genecards.org/cgi-bin/carddisp.pl?gene=SRSF1
SSU72	SSU72 Homolog, RNA Polymerase II CTD Phosphatase	HSPC182, PNAS-120	http://www.genecards.org/cgi-bin/carddisp.pl?gene=SSU72
STAT1	Signal Transducer And Activator Of Transcription 1	CANDF7, IMD31A, IMD31B, IMD31C, ISGF-3, STAT91	http://www.genecards.org/cgi-bin/carddisp.pl?gene=STAT1
STAU1	Staufen Double-Stranded RNA Binding Protein 1	PPP1R150, STAU	http://www.genecards.org/cgi-bin/carddisp.pl?gene=STAU1
STK33	Serine/Threonine Kinase 33		http://www.genecards.org/cgi-bin/carddisp.pl?gene=STK33
STMN1	Stathmin 1	Lag, PP17, PP19, PR22, SMN, metablastin, prosolin, stathmin, C1orf215, LAP18, Op18	http://www.genecards.org/cgi-bin/carddisp.pl?gene=STMN1
STMN4	Stathmin 4	stathmin-4, RB3	http://www.genecards.org/cgi-bin/carddisp.pl?gene=STMN4
STOX2	Storkhead Box 2	KIAA1392	http://www.genecards.org/cgi-bin/carddisp.pl?gene=STOX2
STX10	Syntaxin 10	hsyn10, syntaxin-10, Syn10	http://www.genecards.org/cgi-bin/carddisp.pl?gene=STX10
STX1A	Syntaxin 1A	HPC-1, P35-1, SYN1A, syntaxin-1A, STX1	http://www.genecards.org/cgi-bin/carddisp.pl?gene=STX1A
SUDS3	SDS3 Homolog, SIN3A Corepressor Complex Component	SDS3, SAP45	http://www.genecards.org/cgi-bin/carddisp.pl?gene=SUDS3
SUMO3	Small Ubiquitin-Like Modifier 3	Smt3B, SMT3H1, SUMO-2, Smt3A, SUMO-3	http://www.genecards.org/cgi-bin/carddisp.pl?gene=SUMO3
SV2A	Synaptic Vesicle Glycoprotein 2A	KIAA0736, SV2	http://www.genecards.org/cgi-bin/carddisp.pl?gene=SV2A
SVIP	Small VCP Interacting Protein		http://www.genecards.org/cgi-bin/carddisp.pl?gene=SVIP
SYN1	Synapsin I	SYN1a, SYNI, SYN1b, synapsin-1	http://www.genecards.org/cgi-bin/carddisp.pl?gene=SYN1
SYN2	Synapsin II	SYNII, synapsin-2	http://www.genecards.org/cgi-bin/carddisp.pl?gene=SYN2
SYNE1	Spectrin Repeat Containing Nuclear Envelope Protein 1	Nesp1, SCAR8, dJ45H2.2, nesprin-1, enaptin, EDMD4, 8B, ARCA1, CPG2, C6orf98, KIAA1262, KIAA0796, KIAA1756, Myne-1, Syne-1, KASH1, MYNE1	http://www.genecards.org/cgi-bin/carddisp.pl?gene=SYNE1
SYNGAP1	Synaptic Ras GTPase Activating Protein 1	KIAA1938, RASA1, MRD5, SYNGAP, RASA5	http://www.genecards.org/cgi-bin/carddisp.pl?gene=SYNGAP1
SYT2	Synaptotagmin 2	synaptotagmin-2, SytII, CMS7, MYSPC	http://www.genecards.org/cgi-bin/carddisp.pl?gene=SYT2
SYT7	Synaptotagmin 7	IPCA7, SYT-VII, SYTVII, synaptotagmin-7, PCANAP7, IPCA-7	http://www.genecards.org/cgi-bin/carddisp.pl?gene=SYT7
TACC1	Transforming Acidic Coiled-Coil Containing Protein 1	taxin-1, Ga55, KIAA1103	http://www.genecards.org/cgi-bin/carddisp.pl?gene=TACC1
TAPT1	Transmembrane Anterior Posterior Transformation 1	OCLSBG, CMVFR	http://www.genecards.org/cgi-bin/carddisp.pl?gene=TAPT1
TARDBP	TAR DNA Binding Protein	ALS10, TDP43, TDP-43	http://www.genecards.org/cgi-bin/carddisp.pl?gene=TARDBP
TARS2	Threonyl-TRNA Synthetase 2, Mitochondrial	COXPD21, thrRS, TARSL1	http://www.genecards.org/cgi-bin/carddisp.pl?gene=TARS2
TBKBP1	TBK1 Binding Protein 1	ProSAPiP2, KIAA0775, SINTBAD	http://www.genecards.org/cgi-bin/carddisp.pl?gene=TBKBP1
TDRP	Testis Development Related Protein	C8orf42, TDRP2, Inm01, TDRP1	http://www.genecards.org/cgi-bin/carddisp.pl?gene=TDRP
TEN1	TEN1, CST Complex Subunit	C17orf106	http://www.genecards.org/cgi-bin/carddisp.pl?gene=TEN1
TENM3	Teneurin Transmembrane Protein 3	MCOPCB9, KIAA1455, ODZ3, teneurin-3, tenascin-M3, ten-3, Ten-m3, TNM3	http://www.genecards.org/cgi-bin/carddisp.pl?gene=TENM3
TEX264	Testis Expressed 264	ZSIG11	http://www.genecards.org/cgi-bin/carddisp.pl?gene=TEX264
TFAP2E	Transcription Factor AP-2 Epsilon	AP2-epsilon, AP2E	http://www.genecards.org/cgi-bin/carddisp.pl?gene=TFAP2E
TGFBR3	Transforming Growth Factor Beta Receptor 3	TGFR-3, BGCAN, betaglycan	http://www.genecards.org/cgi-bin/carddisp.pl?gene=TGFBR3
TMEM106B	Transmembrane Protein 106B	HLD16	http://www.genecards.org/cgi-bin/carddisp.pl?gene=TMEM106B
TMEM183A	Transmembrane Protein 183A	C1orf37	http://www.genecards.org/cgi-bin/carddisp.pl?gene=TMEM183A
TMEM25	Transmembrane Protein 25	0610039J01Rik	http://www.genecards.org/cgi-bin/carddisp.pl?gene=TMEM25
TMEM268	Transmembrane Protein 268	C9orf91	http://www.genecards.org/cgi-bin/carddisp.pl?gene=TMEM268
TMEM42	Transmembrane Protein 42		http://www.genecards.org/cgi-bin/carddisp.pl?gene=TMEM42
TMEM8B	Transmembrane Protein 8B	NAG-5, NAG5, C9orf127, NGX6	http://www.genecards.org/cgi-bin/carddisp.pl?gene=TMEM8B
TMSB4X	Thymosin Beta 4 X-Linked	FX, PTMB4, TMSB4, THYB4, TB4X	http://www.genecards.org/cgi-bin/carddisp.pl?gene=TMSB4X
TMX1	Thioredoxin Related Transmembrane Protein 1	PDIA11, TXNDC, TXNDC1, TMX	http://www.genecards.org/cgi-bin/carddisp.pl?gene=TMX1
TNRC6C	Trinucleotide Repeat Containing 6C	KIAA1582	http://www.genecards.org/cgi-bin/carddisp.pl?gene=TNRC6C
TOB1	Transducer Of ERBB2, 1	PIG49, TROB, APRO6, APRO5, TROB1, TOB	http://www.genecards.org/cgi-bin/carddisp.pl?gene=TOB1
TOM1L2	Target Of Myb1 Like 2 Membrane Trafficking Protein		http://www.genecards.org/cgi-bin/carddisp.pl?gene=TOM1L2
TOP3A	DNA Topoisomerase III Alpha	ZGRF7, TOP3	http://www.genecards.org/cgi-bin/carddisp.pl?gene=TOP3A
TRA2A	Transformer 2 Alpha Homolog	Tra2alpha, HSU53209, AWMS1, TRA2-alpha	http://www.genecards.org/cgi-bin/carddisp.pl?gene=TRA2A
TRAPPC5	Trafficking Protein Particle Complex 5	TRS31	http://www.genecards.org/cgi-bin/carddisp.pl?gene=TRAPPC5
TRIM2	Tripartite Motif Containing 2	CMT2R, KIAA0517, RNF86	http://www.genecards.org/cgi-bin/carddisp.pl?gene=TRIM2
TRIM25	Tripartite Motif Containing 25	Z147, ZNF147, EFP, RNF147	http://www.genecards.org/cgi-bin/carddisp.pl?gene=TRIM25
TRIM35	Tripartite Motif Containing 35	MAIR, KIAA1098, HLS5	http://www.genecards.org/cgi-bin/carddisp.pl?gene=TRIM35
TRIM66	Tripartite Motif Containing 66	TIF1D, TIF1DELTA, C11orf29, KIAA0298	http://www.genecards.org/cgi-bin/carddisp.pl?gene=TRIM66
TRIP13	Thyroid Hormone Receptor Interactor 13	16E1BP, MVA3, PCH2, 16E1-BP, TRIP-13	http://www.genecards.org/cgi-bin/carddisp.pl?gene=TRIP13
TRNAI-AAU	Transfer RNA Isoleucine (Anticodon AAU)		http://www.genecards.org/cgi-bin/carddisp.pl?gene=TRNAI-AAU
TSC22D1	TSC22 Domain Family Member 1	KIAA1994, TSC22, TGFB1I4, Ptg-2	http://www.genecards.org/cgi-bin/carddisp.pl?gene=TSC22D1
TSHZ2	Teashirt Zinc Finger Homeobox 2	ZABC2, C20orf17, ZNF218, OVC10-2, TSH2	http://www.genecards.org/cgi-bin/carddisp.pl?gene=TSHZ2
TSPAN17	Tetraspanin 17	FBXO23, TM4SF17, tetraspanin-17, FBX23, Tspan-17	http://www.genecards.org/cgi-bin/carddisp.pl?gene=TSPAN17
TSPAN2	Tetraspanin 2	NET3, TSN2, TSPAN-2, tetraspanin-2	http://www.genecards.org/cgi-bin/carddisp.pl?gene=TSPAN2
TSPAN5	Tetraspanin 5	Tspan-5, NET4, tetraspanin-5, TM4SF9, NET-4	http://www.genecards.org/cgi-bin/carddisp.pl?gene=TSPAN5
TSPAN7	Tetraspanin 7	CCG-B7, CD231, TM4SF2b, tetraspanin-7, tspan-7, MRX58, MXS1, TM4SF2, A15, DXS1692E, TALLA-1	http://www.genecards.org/cgi-bin/carddisp.pl?gene=TSPAN7
TTC17	Tetratricopeptide Repeat Domain 17		http://www.genecards.org/cgi-bin/carddisp.pl?gene=TTC17
TTI2	TELO2 Interacting Protein 2	MRT39, C8orf41	http://www.genecards.org/cgi-bin/carddisp.pl?gene=TTI2
TUBA1A	Tubulin Alpha 1a	B-ALPHA-1, LIS3, hum-a-tub1, hum-a-tub2, TUBA3	http://www.genecards.org/cgi-bin/carddisp.pl?gene=TUBA1A
TUBA1B	Tubulin Alpha 1b	K-ALPHA-1	http://www.genecards.org/cgi-bin/carddisp.pl?gene=TUBA1B
TUBB	Tubulin Beta Class I	CSCSC1, OK/SW-cl.56, M40, CDCBM6, TUBB1, TUBB5, beta1-tubulin	http://www.genecards.org/cgi-bin/carddisp.pl?gene=TUBB
U2AF2	U2 Small Nuclear RNA Auxiliary Factor 2	hU2AF65, U2AF65, hU2AF(65)	http://www.genecards.org/cgi-bin/carddisp.pl?gene=U2AF2
UBA1	Ubiquitin Like Modifier Activating Enzyme 1	A1S9, A1ST, AMCX1, POC20, CFAP124, SMAX2, UBA1A, UBE1X, GXP1, A1S9T, UBE1	http://www.genecards.org/cgi-bin/carddisp.pl?gene=UBA1
UBAP2L	Ubiquitin Associated Protein 2 Like	NICE4, KIAA0144, NICE-4	http://www.genecards.org/cgi-bin/carddisp.pl?gene=UBAP2L
UBE2A	Ubiquitin Conjugating Enzyme E2 A	HHR6A, HR6A, RAD6A, MRXS30, MRXSN, UBC2	http://www.genecards.org/cgi-bin/carddisp.pl?gene=UBE2A
UBE2B	Ubiquitin Conjugating Enzyme E2 B	hHR6B, HR6B, RAD6B, UBC2, E2-17kDa	http://www.genecards.org/cgi-bin/carddisp.pl?gene=UBE2B
UBE2N	Ubiquitin Conjugating Enzyme E2 N	HEL-S-71, UBC13, UbcH-ben, BLU, UbcH13	http://www.genecards.org/cgi-bin/carddisp.pl?gene=UBE2N
UBR2	Ubiquitin Protein Ligase E3 Component N-Recognin 2	C6orf133, bA49A4.1, dJ242G1.1, dJ392M17.3, KIAA0349, N-recognin-2	http://www.genecards.org/cgi-bin/carddisp.pl?gene=UBR2
UBR4	Ubiquitin Protein Ligase E3 Component N-Recognin 4	N-recognin-4, RBAF600, p600, KIAA0462, KIAA1307, ZUBR1	http://www.genecards.org/cgi-bin/carddisp.pl?gene=UBR4
UBTD1	Ubiquitin Domain Containing 1		http://www.genecards.org/cgi-bin/carddisp.pl?gene=UBTD1
UCHL1	Ubiquitin C-Terminal Hydrolase L1	Uch-L1, SPG79, PGP95, NDGOA, HEL-S-53, HEL-117, PARK5, PGP9.5	http://www.genecards.org/cgi-bin/carddisp.pl?gene=UCHL1
UGT8	UDP Glycosyltransferase 8	UGT4, CGT	http://www.genecards.org/cgi-bin/carddisp.pl?gene=UGT8
ULK2	Unc-51 Like Autophagy Activating Kinase 2	KIAA0623, ATG1B, Unc51.2	http://www.genecards.org/cgi-bin/carddisp.pl?gene=ULK2
UNC13A	Unc-13 Homolog A	KIAA1032, Munc13-1	http://www.genecards.org/cgi-bin/carddisp.pl?gene=UNC13A
UNC13C	Unc-13 Homolog C	Munc13-3	http://www.genecards.org/cgi-bin/carddisp.pl?gene=UNC13C
UNC5C	Unc-5 Netrin Receptor C	UNC5H3	http://www.genecards.org/cgi-bin/carddisp.pl?gene=UNC5C
UQCRH	Ubiquinol-Cytochrome C Reductase Hinge Protein	UQCR8, QCR6	http://www.genecards.org/cgi-bin/carddisp.pl?gene=UQCRH
USP15	Ubiquitin Specific Peptidase 15	Unph4, KIAA0529, Unph-2	http://www.genecards.org/cgi-bin/carddisp.pl?gene=USP15
USP16	Ubiquitin Specific Peptidase 16	UBPM, UBP-M	http://www.genecards.org/cgi-bin/carddisp.pl?gene=USP16
USP53	Ubiquitin Specific Peptidase 53	KIAA1350	http://www.genecards.org/cgi-bin/carddisp.pl?gene=USP53
VAMP1	Vesicle Associated Membrane Protein 1	SPAX1, SYB1, Synaptobrevin-1, VAMP-1	http://www.genecards.org/cgi-bin/carddisp.pl?gene=VAMP1
VAMP2	Vesicle Associated Membrane Protein 2	SYB2, VAMP-2, Synaptobrevin-2	http://www.genecards.org/cgi-bin/carddisp.pl?gene=VAMP2
VAMP3	Vesicle Associated Membrane Protein 3	cellubrevin, synaptobrevin-3, CEB, VAMP-3, SYB3	http://www.genecards.org/cgi-bin/carddisp.pl?gene=VAMP3
VAPA	VAMP Associated Protein A	VAP-A, VAP33, VAP-33, VAMP-A, hVAP-33	http://www.genecards.org/cgi-bin/carddisp.pl?gene=VAPA
VAPB	VAMP Associated Protein B And C	VAP-B, VAMP-B/VAMP-C, ALS8, VAMP-B, VAP-B/VAP-C	http://www.genecards.org/cgi-bin/carddisp.pl?gene=VAPB
VDR	Vitamin D Receptor	NR1I1, PPP1R163	http://www.genecards.org/cgi-bin/carddisp.pl?gene=VDR
VGLL4	Vestigial Like Family Member 4	KIAA0121, VGL-4	http://www.genecards.org/cgi-bin/carddisp.pl?gene=VGLL4
VPS13A	Vacuolar Protein Sorting 13 Homolog A	CHAC, CHOREIN, KIAA0986	http://www.genecards.org/cgi-bin/carddisp.pl?gene=VPS13A
VPS33B	VPS33B, Late Endosome And Lysosome Associated	hVPS33B	http://www.genecards.org/cgi-bin/carddisp.pl?gene=VPS33B
VSNL1	Visinin Like 1	VLP-1, VILIP, VISL1, HLP3, HPCAL3, VILIP-1, HUVISL1	http://www.genecards.org/cgi-bin/carddisp.pl?gene=VSNL1
WASF1	WAS Protein Family Member 1	WAVE, KIAA0269, SCAR1, WAVE1	http://www.genecards.org/cgi-bin/carddisp.pl?gene=WASF1
WDR26	WD Repeat Domain 26	CDW2, MIP2, SKDEAS, GID7	http://www.genecards.org/cgi-bin/carddisp.pl?gene=WDR26
WDR35	WD Repeat Domain 35	naofen, KIAA1336, IFT121, IFTA1, SRTD7, CED2	http://www.genecards.org/cgi-bin/carddisp.pl?gene=WDR35
WDR7	WD Repeat Domain 7	KIAA0541, TRAG	http://www.genecards.org/cgi-bin/carddisp.pl?gene=WDR7
YIPF4	Yip1 Domain Family Member 4	FinGER4, Nbla11189	http://www.genecards.org/cgi-bin/carddisp.pl?gene=YIPF4
YME1L1	YME1 Like 1 ATPase	FTSH, MEG4, OPA11, meg-4, FTSH1, PAMP, YME1L	http://www.genecards.org/cgi-bin/carddisp.pl?gene=YME1L1
YWHAB	Tyrosine 3-Monooxygenase/Tryptophan 5-Monooxygenase Activation Protein Beta	HEL-S-1, GW128, HS1, YWHAA, KCIP-1	http://www.genecards.org/cgi-bin/carddisp.pl?gene=YWHAB
YWHAE	Tyrosine 3-Monooxygenase/Tryptophan 5-Monooxygenase Activation Protein Epsilon	14-3-3E, MDS, MDCR, KCIP-1, HEL2	http://www.genecards.org/cgi-bin/carddisp.pl?gene=YWHAE
YWHAG	Tyrosine 3-Monooxygenase/Tryptophan 5-Monooxygenase Activation Protein Gamma	14-3-3GAMMA, EIEE56, PPP1R170, KCIP-1	http://www.genecards.org/cgi-bin/carddisp.pl?gene=YWHAG
YY1	YY1 Transcription Factor	DELTA, GADEVS, YIN-YANG-1, UCRBP, INO80S, NF-E1, YY-1	http://www.genecards.org/cgi-bin/carddisp.pl?gene=YY1
ZBTB18	Zinc Finger And BTB Domain Containing 18	C2H2-171, MRD22, ZNF238, TAZ1, RP58, TAZ-1	http://www.genecards.org/cgi-bin/carddisp.pl?gene=ZBTB18
ZBTB3	Zinc Finger And BTB Domain Containing 3		http://www.genecards.org/cgi-bin/carddisp.pl?gene=ZBTB3
ZBTB4	Zinc Finger And BTB Domain Containing 4	ZNF903, KAISO-L1, KIAA1538	http://www.genecards.org/cgi-bin/carddisp.pl?gene=ZBTB4
ZBTB43	Zinc Finger And BTB Domain Containing 43	ZNF-X, ZNF297B, KIAA0414, ZBTB22B	http://www.genecards.org/cgi-bin/carddisp.pl?gene=ZBTB43
ZC3H12C	Zinc Finger CCCH-Type Containing 12C	KIAA1726, MCPIP3	http://www.genecards.org/cgi-bin/carddisp.pl?gene=ZC3H12C
ZC3H15	Zinc Finger CCCH-Type Containing 15	LEREPO4, DFRP1, HT010, MSTP012	http://www.genecards.org/cgi-bin/carddisp.pl?gene=ZC3H15
ZDHHC22	Zinc Finger DHHC-Type Containing 22	C14orf59, zDHHC22, DHHC-22	http://www.genecards.org/cgi-bin/carddisp.pl?gene=ZDHHC22
ZDHHC3	Zinc Finger DHHC-Type Containing 3	GODZ, ZNF373, DHHC3, DHHC-3	http://www.genecards.org/cgi-bin/carddisp.pl?gene=ZDHHC3
ZDHHC6	Zinc Finger DHHC-Type Containing 6	DHHC-6, ZNF376	http://www.genecards.org/cgi-bin/carddisp.pl?gene=ZDHHC6
ZFAND5	Zinc Finger AN1-Type Containing 5	ZFAND5A, ZA20D2, ZNF216	http://www.genecards.org/cgi-bin/carddisp.pl?gene=ZFAND5
ZFX	Zinc Finger Protein X-Linked	ZNF926	http://www.genecards.org/cgi-bin/carddisp.pl?gene=ZFX
ZIC1	Zic Family Member 1	ZNF201, ZIC, CRS6	http://www.genecards.org/cgi-bin/carddisp.pl?gene=ZIC1
ZNF131	Zinc Finger Protein 131	pHZ-10, ZBTB35	http://www.genecards.org/cgi-bin/carddisp.pl?gene=ZNF131
ZNF319	Zinc Finger Protein 319	ZFP319, KIAA1388	http://www.genecards.org/cgi-bin/carddisp.pl?gene=ZNF319
ZNF638	Zinc Finger Protein 638	Zfp638, ZFML, NP220	http://www.genecards.org/cgi-bin/carddisp.pl?gene=ZNF638
ZNF804A	Zinc Finger Protein 804A	C2orf10	http://www.genecards.org/cgi-bin/carddisp.pl?gene=ZNF804A
ZRANB2	Zinc Finger RANBP2-Type Containing 2	ZIS, ZIS2, ZNF265, ZIS1	http://www.genecards.org/cgi-bin/carddisp.pl?gene=ZRANB2

## Sheet: GO Molecular Function
Category	ID	Name	Source	p-value	q-value Bonferroni	q-value FDR B&H	q-value FDR B&Y	Hit Count in Query List	Hit Count in Genome	Hit in Query List
GO: Molecular Function	GO:0019899	enzyme binding		2.098e-13	3.134e-10	3.134e-10	2.472e-09	142	1929	VAPB,CDKN1A,ABAT,MAPT,PDPK1,MBP,ACTB,COPB2,BACE1,HMGB1,U2AF2,ACVRL1,MDM4,HNRNPD,CHRNA7,HNRNPK,RYR2,PIK3IP1,CKB,TUBA1B,SERPINA1,SAFB,UBE2A,UBE2B,UBE2N,CLU,PIK3R2,UCHL1,MICAL3,DNAJB2,DNAJA1,HSPA8,HSP90AA1,AGAP2,EIF4E2,HSP90AB1,BRMS1,TOM1L2,CUL3,EZR,AMFR,BIN1,SRSF1,IPO7,ZBTB4,TUBB,APP,PPIB,YY1,YWHAB,YWHAE,YWHAG,ERLIN1,PPP1CB,ARF6,CRY1,PIAS4,ARHGAP4,IBTK,PPP3CA,FEZ1,DNM3,PRKAR1A,SMARCA4,IPO13,PRKAR1B…
GO: Molecular Function	GO:0008092	cytoskeletal protein binding		2.957e-09	4.418e-06	2.209e-06	1.742e-05	73	886	VAPB,VAPA,RAB11B,MAP1A,MAP1B,MAPT,CFL1,ACTB,RUSC1,PEX14,PFN2,HNRNPK,S100B,SNX6,MICAL3,HSP90AA1,EZR,FLNB,BIN1,NEBL,GAS7,MIB2,RAB6B,RHOA,FEZ1,SNAP25,ATP1A1,SNCB,NEXN,UNC13A,MYO16,KIF1C,KATNAL2,KIF1B,SPTBN2,CKAP5,PANX1,EPS8L1,MAST2,ITGB1,JAKMIP2,MPRIP,STMN4,CDK5R1,STX1A,VAMP2,SYN1,KIF2A,KIF3C,GNAS,GNB1,WASF1,RAB6A,DPYSL3,TRIM2,MID2,CALM2,CALM3,SYNE1,KTN1,DYRK1A,SPAG9,STMN1,RCAN3,KIF3A,ARPC2,ARL8B,LM…
GO: Molecular Function	GO:0019904	protein domain specific binding		6.361e-09	9.503e-06	3.168e-06	2.498e-05	63	729	VAPB,VAPA,EPS15,DLGAP1,PDE2A,MAPT,ESRRA,U2AF2,HNRNPK,CASKIN1,SCN2A,QKI,DNAJA1,HSPA8,HSP90AA1,HSP90AB1,CUL3,EZR,SRSF1,TUBB,ID3,NDFIP2,CPE,MED1,APP,YWHAB,YWHAE,YWHAG,CASK,RHOA,C16orf70,LUC7L,CSNK2B,PRKAR2A,ATF4,RIMS1,SNAP25,ATP1A1,ATP2B2,UNC13A,ITGB1,DDIT3,ELMO1,DDX6,SYNGAP1,STX1A,TUBA1A,TACC1,GNAS,RAB6A,SFN,KRAS,RAN,DPYSL3,CALM2,CALM3,DTX1,L1CAM,CASP8,GRIA2,RFC1,SHISA9,TGFBR3
GO: Molecular Function	GO:0019900	kinase binding		7.223e-08	0.0001079	2.698e-05	0.0002128	58	691	MAPT,PDPK1,ACTB,COPB2,ACVRL1,CHRNA7,RYR2,PIK3IP1,SAFB,PIK3R2,HSP90AA1,AGAP2,HSP90AB1,TOM1L2,EZR,SRSF1,ZBTB4,YWHAG,PPP1CB,CRY1,IBTK,FEZ1,PRKAR1A,PRKAR1B,PRKAR2A,RIMS1,ATP1A1,GPRC5B,NAP1L1,ITGAV,ITGB1,JAKMIP2,GFAP,SYNGAP1,CDK5R1,STX1A,PTPRF,SV2A,C1QBP,HNRNPA0,SYN1,SFN,DIRAS1,CALM2,CALM3,SH2D3C,GRIA2,SPAG9,GRIN2A,LDHA,CCNE1,CDC37,TOB1,ELAVL1,AKAP11,PARD3,CDH2,NBR1
GO: Molecular Function	GO:0017111	nucleoside-triphosphatase activity		2.226e-07	0.0003326	5.954e-05	0.0004696	62	785	RAB11B,TUBA1B,CLU,MYL6B,ATP6V1D,HRAS,HSPA8,HSP90AA1,AGAP2,TUBB,RAB6B,ABCC6,ARF3,ARF6,RHOA,RAB18,DNM3,SMARCA4,ATP1A1,ATP1A3,ATP1B2,ATP1B3,ATP2A2,YME1L1,ATP2B2,MYO16,KIF1C,ATP5PB,ATP6V1A,ATP6V0C,KATNAL2,ATP6V0A1,KIF1B,SRPRA,DDX5,DDX6,DDX46,RND1,TUBA1A,RAB7A,ATP11C,GNAI1,GNAI2,KIF2A,KIF3C,GNAL,GNAS,GNB1,RAB6A,DYNC1H1,KRAS,RAN,DIRAS1,RFC1,NKIRAS2,KIF3A,CCNH,ARL8B,EIF5,LONRF2,CRBN,ATP6V0A2
GO: Molecular Function	GO:0016462	pyrophosphatase activity		2.91e-07	0.0004348	5.954e-05	0.0004696	64	827	RAB11B,TUBA1B,CLU,MYL6B,ATP6V1D,HRAS,HSPA8,HSP90AA1,AGAP2,TUBB,RAB6B,ABCC6,ARF3,ARF6,RHOA,RAB18,DNM3,SMARCA4,ATP1A1,ATP1A3,ATP1B2,ATP1B3,ATP2A2,YME1L1,ATP2B2,MYO16,KIF1C,ATP5PB,ATP6V1A,ATP6V0C,KATNAL2,ATP6V0A1,KIF1B,SRPRA,DDX5,DDX6,DDX46,RND1,PHOSPHO1,TUBA1A,RAB7A,ATP11C,GNAI1,GNAI2,KIF2A,KIF3C,GNAL,GNAS,GNB1,RAB6A,DYNC1H1,KRAS,PRUNE2,RAN,DIRAS1,RFC1,NKIRAS2,KIF3A,CCNH,ARL8B,EIF5,LONRF2,CRBN,ATP6…
GO: Molecular Function	GO:0016818	hydrolase activity, acting on acid anhydrides, in phosphorus-containing anhydrides		3.17e-07	0.0004735	5.954e-05	0.0004696	64	829	RAB11B,TUBA1B,CLU,MYL6B,ATP6V1D,HRAS,HSPA8,HSP90AA1,AGAP2,TUBB,RAB6B,ABCC6,ARF3,ARF6,RHOA,RAB18,DNM3,SMARCA4,ATP1A1,ATP1A3,ATP1B2,ATP1B3,ATP2A2,YME1L1,ATP2B2,MYO16,KIF1C,ATP5PB,ATP6V1A,ATP6V0C,KATNAL2,ATP6V0A1,KIF1B,SRPRA,DDX5,DDX6,DDX46,RND1,PHOSPHO1,TUBA1A,RAB7A,ATP11C,GNAI1,GNAI2,KIF2A,KIF3C,GNAL,GNAS,GNB1,RAB6A,DYNC1H1,KRAS,PRUNE2,RAN,DIRAS1,RFC1,NKIRAS2,KIF3A,CCNH,ARL8B,EIF5,LONRF2,CRBN,ATP6…
GO: Molecular Function	GO:0016817	hydrolase activity, acting on acid anhydrides		3.307e-07	0.0004941	5.954e-05	0.0004696	64	830	RAB11B,TUBA1B,CLU,MYL6B,ATP6V1D,HRAS,HSPA8,HSP90AA1,AGAP2,TUBB,RAB6B,ABCC6,ARF3,ARF6,RHOA,RAB18,DNM3,SMARCA4,ATP1A1,ATP1A3,ATP1B2,ATP1B3,ATP2A2,YME1L1,ATP2B2,MYO16,KIF1C,ATP5PB,ATP6V1A,ATP6V0C,KATNAL2,ATP6V0A1,KIF1B,SRPRA,DDX5,DDX6,DDX46,RND1,PHOSPHO1,TUBA1A,RAB7A,ATP11C,GNAI1,GNAI2,KIF2A,KIF3C,GNAL,GNAS,GNB1,RAB6A,DYNC1H1,KRAS,PRUNE2,RAN,DIRAS1,RFC1,NKIRAS2,KIF3A,CCNH,ARL8B,EIF5,LONRF2,CRBN,ATP6…
GO: Molecular Function	GO:0019901	protein kinase binding		3.587e-07	0.0005359	5.954e-05	0.0004696	52	620	MAPT,PDPK1,ACTB,COPB2,ACVRL1,CHRNA7,RYR2,SAFB,PIK3R2,HSP90AA1,AGAP2,HSP90AB1,TOM1L2,EZR,SRSF1,ZBTB4,YWHAG,PPP1CB,CRY1,IBTK,FEZ1,PRKAR1A,PRKAR1B,PRKAR2A,RIMS1,ATP1A1,GPRC5B,ITGAV,ITGB1,SYNGAP1,CDK5R1,PTPRF,SV2A,C1QBP,HNRNPA0,SYN1,SFN,DIRAS1,CALM2,CALM3,SH2D3C,GRIA2,SPAG9,GRIN2A,CCNE1,CDC37,TOB1,ELAVL1,AKAP11,PARD3,CDH2,NBR1
GO: Molecular Function	GO:0003924	GTPase activity		8.9e-07	0.00133	0.000133	0.001049	27	236	RAB11B,TUBA1B,HRAS,AGAP2,TUBB,RAB6B,ARF3,ARF6,RHOA,RAB18,DNM3,SRPRA,RND1,TUBA1A,RAB7A,GNAI1,GNAI2,GNAL,GNAS,GNB1,RAB6A,KRAS,RAN,DIRAS1,NKIRAS2,ARL8B,EIF5
GO: Molecular Function	GO:0003723	RNA binding		1.746e-06	0.002608	0.0002371	0.00187	103	1632	RPL21,RPL22,ATXN2L,SMNDC1,SF3A1,ETF1,RPS9,HMGB1,RPS17,U2AF2,RPS27A,HNRNPD,HNRNPK,HNRNPU,CIRBP,TUBA1B,UBA1,SAFB,ATXN1,UBE2N,RBM27,ZRANB2,TRA2A,QKI,HSPA8,HSP90AA1,EIF4E2,HSP90AB1,EZR,FLNB,SRSF1,SPOUT1,CWC15,POLR2D,CCT4,TNRC6C,TARS2,PPIB,YY1,KHDC4,PABPC1,YWHAE,YWHAG,SRRT,LUC7L,CS,SCG3,CSRP1,EIF3B,RIMS1,EIF3D,SNRPF,KIF1C,EDF1,TRIM25,ZC3H15,NAP1L1,NAP1L4,SRPRA,LARP4,GDI2,EIF6,MYEF2,DDX5,DDX6,STAU1,CSD…
GO: Molecular Function	GO:0019207	kinase regulator activity		5.93e-06	0.008859	0.0007382	0.005822	24	216	CDKN1A,LRTM1,HMGB1,PIK3R2,PPP1R1B,AGAP2,HSP90AB1,YWHAG,MADD,IBTK,CSNK2B,PRKAR1A,PRKAR1B,PRKAR2A,GPRC5B,CDK5R1,SFN,CALM2,CALM3,LRRC4B,CCNE1,CDC37,CCNH,AKAP11
GO: Molecular Function	GO:0098772	molecular function regulator		9.494e-06	0.01418	0.001091	0.008606	90	1430	CDKN1A,SNF8,CYTH3,PDPK1,LRTM1,HMGB1,HSPBP1,PFN2,CHN1,KCNIP2,CHN2,CHRM4,CHRNA7,FZR1,SERPINA1,NRXN2,PIK3R2,PPP1R1B,SCN4B,ARHGAP21,ACAP3,HSP90AA1,AGAP2,HSP90AB1,SET,IPO7,APLP2,MED1,APP,YWHAE,YWHAG,MADD,PPP1R1A,ARHGAP4,IBTK,PPP2R1B,PPP2R2C,CSNK2B,PRKAR1A,PRKAR1B,PRKAR2A,RIMS1,SNCB,TEN1,ATP1B2,ATP1B3,MTMR9,GPRC5B,FNBP1,ARPP19,PSAP,SPTBN2,PSMD1,NCF4,EPS8L1,ARHGEF11,GDI1,GDI2,ELMO1,SYNGAP1,PTN,CDK5R1,ST…
GO: Molecular Function	GO:0019887	protein kinase regulator activity		1.126e-05	0.01682	0.001189	0.00938	22	195	CDKN1A,LRTM1,HMGB1,PPP1R1B,AGAP2,HSP90AB1,YWHAG,MADD,IBTK,CSNK2B,PRKAR1A,PRKAR1B,PRKAR2A,GPRC5B,CDK5R1,SFN,CALM2,CALM3,LRRC4B,CCNE1,CDC37,CCNH
GO: Molecular Function	GO:0044325	ion channel binding		1.194e-05	0.01784	0.001189	0.00938	17	127	KCNIP2,RYR2,SCN4B,EPN1,HSP90AA1,HSP90AB1,YWHAE,RIMS4,RIMS1,SNAP25,PANX1,STX1A,VAMP2,NEDD4L,CALM2,CALM3,GRINA
GO: Molecular Function	GO:0044877	protein-containing complex binding		1.299e-05	0.0194	0.001201	0.009469	99	1626	VAPB,CDKN1A,VAPA,PCSK2,DLGAP1,HK1,MAP1A,MAP1B,MAPT,PDPK1,ETF1,ACTB,PEX14,ACVRL1,PFKP,EZH1,HNRNPD,HNRNPK,HNRNPU,BAP1,FZR1,MFGE8,SAFB,ATXN1,PIM1,DNAJB2,HSPA8,HSP90AA1,HSP90AB1,EZR,AMFR,BIN1,NEBL,TUBB,GAS7,MED1,PPIB,YWHAB,YWHAE,MBD3,CASK,CSNK2B,SMARCA4,NEXN,MYO16,KIF1C,LDLRAP1,SP3,KATNAL2,NCKAP1,ADAM23,KIF1B,CKAP5,SRPRA,PANX1,EPS8L1,MAST2,ITGB1,JAKMIP2,EIF6,GFAP,ENY2,CIC,SMYD2,BHMT,TRIM66,PTPRF,VAMP…
GO: Molecular Function	GO:0051082	unfolded protein binding		1.386e-05	0.0207	0.001201	0.009469	15	103	CALR3,DNAJA2,PFDN5,DNAJB2,DNAJA1,HSPA8,HSP90AA1,HSP90AB1,CCT4,PPIB,CDC37L1,PTGES3,DNAJB11,NAP1L4,CDC37
GO: Molecular Function	GO:0034236	protein kinase A catalytic subunit binding		1.447e-05	0.02161	0.001201	0.009469	6	15	RYR2,EZR,PRKAR1A,PRKAR1B,PRKAR2A,AKAP11
GO: Molecular Function	GO:0047485	protein N-terminus binding		1.631e-05	0.02437	0.001283	0.01012	16	117	SNF8,PEX14,KCNIP2,CLU,ARF6,FEZ1,SMARCA4,SNAP25,UNC13A,STX1A,PEX19,SCFD1,CALM2,CALM3,EIF5A,DCTN4
GO: Molecular Function	GO:0022853	active ion transmembrane transporter activity		2.309e-05	0.0345	0.001725	0.01361	20	175	SLC24A4,SLC24A2,SLC1A2,ABCC6,SLC6A11,SLC6A13,SLC10A1,SLC20A2,ATP1A1,ATP1A3,ATP1B2,ATP1B3,ATP2A2,ATP2B2,ATP5PB,ATP6V1A,ATP6V0C,ATP6V0A1,SLC17A7,ATP6V0A2
GO: Molecular Function	GO:0019829	cation-transporting ATPase activity		2.981e-05	0.04453	0.00212	0.01672	11	62	ATP1A1,ATP1A3,ATP1B2,ATP1B3,ATP2A2,ATP2B2,ATP5PB,ATP6V1A,ATP6V0C,ATP6V0A1,ATP6V0A2
GO: Molecular Function	GO:0042625	ATPase coupled ion transmembrane transporter activity		3.343e-05	0.04995	0.00227	0.01791	12	74	ABCC6,ATP1A1,ATP1A3,ATP1B2,ATP1B3,ATP2A2,ATP2B2,ATP5PB,ATP6V1A,ATP6V0C,ATP6V0A1,ATP6V0A2
GO: Molecular Function	GO:0017076	purine nucleotide binding		3.651e-05	0.05455	0.002324	0.01833	109	1879	RAB11B,PDE2A,PDE4A,ARL17B,HK1,PDPK1,DNAJA2,ACTB,ACVRL1,PFKP,PFN2,TRIP13,HNRNPU,CKB,TUBA1B,HSPA12A,UBA1,UBE2A,UBE2B,CLCN7,CAMKV,UBE2N,PIM1,PI4KA,PIP4K2A,HRAS,AK1,DNAJA1,MAP4K4,HSPA8,IP6K2,HSP90AA1,AGAP2,HSP90AB1,MINK1,TUBB,CCT4,TARS2,RAB6B,ABCC6,PDXK,ARF3,CASK,ARF6,RHOA,RAB18,AATK,CSNK1D,STK33,DNM3,PRKAR1A,SMARCA4,PRKAR1B,PRKAR2A,ATP1A1,ATP1A3,ATP2A2,ULK2,YME1L1,ATP2B2,MYO16,KIF1C,PRPS1,ATP6V1A,KA…
GO: Molecular Function	GO:0032553	ribonucleotide binding		3.733e-05	0.05577	0.002324	0.01833	109	1880	RAB11B,PDE2A,PDE4A,ARL17B,HK1,PDPK1,DNAJA2,ACTB,ACVRL1,PFKP,TRIP13,HNRNPU,CKB,TUBA1B,HSPA12A,UBA1,UBE2A,UBE2B,CLCN7,CAMKV,UBE2N,PIM1,PI4KA,PIP4K2A,HRAS,AK1,DNAJA1,MAP4K4,HSPA8,IP6K2,HSP90AA1,AGAP2,HSP90AB1,MINK1,TUBB,CCT4,TARS2,RAB6B,ABCC6,PDXK,ARF3,CASK,ARF6,RHOA,RAB18,AATK,CSNK1D,STK33,DNM3,PRKAR1A,SMARCA4,PRKAR1B,PRKAR2A,ATP1A1,ATP1A3,ATP2A2,ULK2,YME1L1,ATP2B2,MYO16,KIF1C,PRPS1,ATP6V1A,KATNAL2…
GO: Molecular Function	GO:0032555	purine ribonucleotide binding		4.187e-05	0.06256	0.002475	0.01952	108	1864	RAB11B,PDE2A,PDE4A,ARL17B,HK1,PDPK1,DNAJA2,ACTB,ACVRL1,PFKP,TRIP13,HNRNPU,CKB,TUBA1B,HSPA12A,UBA1,UBE2A,UBE2B,CLCN7,CAMKV,UBE2N,PIM1,PI4KA,PIP4K2A,HRAS,AK1,DNAJA1,MAP4K4,HSPA8,IP6K2,HSP90AA1,AGAP2,HSP90AB1,MINK1,TUBB,CCT4,TARS2,RAB6B,ABCC6,PDXK,ARF3,CASK,ARF6,RHOA,RAB18,AATK,CSNK1D,STK33,DNM3,PRKAR1A,SMARCA4,PRKAR1B,PRKAR2A,ATP1A1,ATP1A3,ATP2A2,ULK2,YME1L1,ATP2B2,MYO16,KIF1C,PRPS1,ATP6V1A,KATNAL2…
GO: Molecular Function	GO:0030234	enzyme regulator activity		4.306e-05	0.06434	0.002475	0.01952	67	1023	CDKN1A,PDPK1,LRTM1,HMGB1,HSPBP1,PFN2,CHN1,CHN2,FZR1,SERPINA1,PIK3R2,PPP1R1B,ARHGAP21,ACAP3,HSP90AA1,AGAP2,HSP90AB1,SET,IPO7,APLP2,APP,YWHAG,MADD,PPP1R1A,ARHGAP4,IBTK,PPP2R1B,PPP2R2C,CSNK2B,PRKAR1A,PRKAR1B,PRKAR2A,RIMS1,SNCB,TEN1,ATP1B2,ATP1B3,MTMR9,GPRC5B,ARPP19,PSAP,PSMD1,NCF4,ARHGEF11,GDI1,GDI2,SYNGAP1,PTN,CDK5R1,SPOCK3,PLCB1,RAB6A,SFN,CALM2,CALM3,CALU,LRRC4B,ARHGAP35,RFC1,RCAN3,CCNE1,CDC37,CCN…
GO: Molecular Function	GO:0032561	guanyl ribonucleotide binding		6.544e-05	0.09777	0.003621	0.02856	33	399	RAB11B,PDE2A,ARL17B,TUBA1B,HRAS,HSP90AA1,AGAP2,HSP90AB1,TUBB,RAB6B,ARF3,ARF6,RHOA,RAB18,DNM3,PRPS1,SRPRA,RND1,RAB4B,TUBA1A,RAB7A,GNAI1,GNAI2,GNAL,GNAS,RAB6A,KRAS,RAN,DIRAS1,ARHGAP35,NKIRAS2,ARL8B,EIF5
GO: Molecular Function	GO:0019001	guanyl nucleotide binding		6.869e-05	0.1026	0.003665	0.02891	33	400	RAB11B,PDE2A,ARL17B,TUBA1B,HRAS,HSP90AA1,AGAP2,HSP90AB1,TUBB,RAB6B,ARF3,ARF6,RHOA,RAB18,DNM3,PRPS1,SRPRA,RND1,RAB4B,TUBA1A,RAB7A,GNAI1,GNAI2,GNAL,GNAS,RAB6A,KRAS,RAN,DIRAS1,ARHGAP35,NKIRAS2,ARL8B,EIF5
GO: Molecular Function	GO:0015631	tubulin binding		0.0001246	0.1862	0.006268	0.04943	26	293	VAPB,VAPA,MAP1A,MAP1B,MAPT,PEX14,EZR,FEZ1,SNCB,KIF1C,KATNAL2,KIF1B,CKAP5,MAST2,JAKMIP2,STMN4,KIF2A,KIF3C,GNAS,MID2,STMN1,KIF3A,ARL8B,PAFAH1B1,EML1,CASC1
GO: Molecular Function	GO:0005525	GTP binding		0.0001259	0.188	0.006268	0.04943	31	378	RAB11B,ARL17B,TUBA1B,HRAS,HSP90AA1,AGAP2,HSP90AB1,TUBB,RAB6B,ARF3,ARF6,RHOA,RAB18,DNM3,SRPRA,RND1,RAB4B,TUBA1A,RAB7A,GNAI1,GNAI2,GNAL,GNAS,RAB6A,KRAS,RAN,DIRAS1,ARHGAP35,NKIRAS2,ARL8B,EIF5
GO: Molecular Function	GO:0030291	protein serine/threonine kinase inhibitor activity		0.0001419	0.2121	0.006683	0.05271	7	30	CDKN1A,PPP1R1B,YWHAG,PRKAR1A,PRKAR1B,PRKAR2A,SFN
GO: Molecular Function	GO:0035639	purine ribonucleoside triphosphate binding		0.0001431	0.2139	0.006683	0.05271	103	1815	RAB11B,ARL17B,HK1,PDPK1,DNAJA2,ACTB,ACVRL1,PFKP,TRIP13,HNRNPU,CKB,TUBA1B,HSPA12A,UBA1,UBE2A,UBE2B,CLCN7,CAMKV,UBE2N,PIM1,PI4KA,PIP4K2A,HRAS,AK1,DNAJA1,MAP4K4,HSPA8,IP6K2,HSP90AA1,AGAP2,HSP90AB1,MINK1,TUBB,CCT4,TARS2,RAB6B,ABCC6,PDXK,ARF3,CASK,ARF6,RHOA,RAB18,AATK,CSNK1D,STK33,DNM3,SMARCA4,ATP1A1,ATP1A3,ATP2A2,ULK2,YME1L1,ATP2B2,MYO16,KIF1C,PRPS1,ATP6V1A,KATNAL2,KIF1B,SNRK,SRPRA,MAST2,DDX5,DDX6,DD…
GO: Molecular Function	GO:0032550	purine ribonucleoside binding		0.0001868	0.2791	0.008457	0.0667	103	1828	RAB11B,ARL17B,HK1,PDPK1,DNAJA2,ACTB,ACVRL1,PFKP,TRIP13,HNRNPU,CKB,TUBA1B,HSPA12A,UBA1,UBE2A,UBE2B,CLCN7,CAMKV,UBE2N,PIM1,PI4KA,PIP4K2A,HRAS,AK1,DNAJA1,MAP4K4,HSPA8,IP6K2,HSP90AA1,AGAP2,HSP90AB1,MINK1,TUBB,CCT4,TARS2,RAB6B,ABCC6,PDXK,ARF3,CASK,ARF6,RHOA,RAB18,AATK,CSNK1D,STK33,DNM3,SMARCA4,ATP1A1,ATP1A3,ATP2A2,ULK2,YME1L1,ATP2B2,MYO16,KIF1C,PRPS1,ATP6V1A,KATNAL2,KIF1B,SNRK,SRPRA,MAST2,DDX5,DDX6,DD…
GO: Molecular Function	GO:0032549	ribonucleoside binding		0.0001985	0.2965	0.008473	0.06682	103	1831	RAB11B,ARL17B,HK1,PDPK1,DNAJA2,ACTB,ACVRL1,PFKP,TRIP13,HNRNPU,CKB,TUBA1B,HSPA12A,UBA1,UBE2A,UBE2B,CLCN7,CAMKV,UBE2N,PIM1,PI4KA,PIP4K2A,HRAS,AK1,DNAJA1,MAP4K4,HSPA8,IP6K2,HSP90AA1,AGAP2,HSP90AB1,MINK1,TUBB,CCT4,TARS2,RAB6B,ABCC6,PDXK,ARF3,CASK,ARF6,RHOA,RAB18,AATK,CSNK1D,STK33,DNM3,SMARCA4,ATP1A1,ATP1A3,ATP2A2,ULK2,YME1L1,ATP2B2,MYO16,KIF1C,PRPS1,ATP6V1A,KATNAL2,KIF1B,SNRK,SRPRA,MAST2,DDX5,DDX6,DD…
GO: Molecular Function	GO:0001883	purine nucleoside binding		0.0001985	0.2965	0.008473	0.06682	103	1831	RAB11B,ARL17B,HK1,PDPK1,DNAJA2,ACTB,ACVRL1,PFKP,TRIP13,HNRNPU,CKB,TUBA1B,HSPA12A,UBA1,UBE2A,UBE2B,CLCN7,CAMKV,UBE2N,PIM1,PI4KA,PIP4K2A,HRAS,AK1,DNAJA1,MAP4K4,HSPA8,IP6K2,HSP90AA1,AGAP2,HSP90AB1,MINK1,TUBB,CCT4,TARS2,RAB6B,ABCC6,PDXK,ARF3,CASK,ARF6,RHOA,RAB18,AATK,CSNK1D,STK33,DNM3,SMARCA4,ATP1A1,ATP1A3,ATP2A2,ULK2,YME1L1,ATP2B2,MYO16,KIF1C,PRPS1,ATP6V1A,KATNAL2,KIF1B,SNRK,SRPRA,MAST2,DDX5,DDX6,DD…
GO: Molecular Function	GO:0001882	nucleoside binding		0.0002284	0.3412	0.009478	0.07475	103	1838	RAB11B,ARL17B,HK1,PDPK1,DNAJA2,ACTB,ACVRL1,PFKP,TRIP13,HNRNPU,CKB,TUBA1B,HSPA12A,UBA1,UBE2A,UBE2B,CLCN7,CAMKV,UBE2N,PIM1,PI4KA,PIP4K2A,HRAS,AK1,DNAJA1,MAP4K4,HSPA8,IP6K2,HSP90AA1,AGAP2,HSP90AB1,MINK1,TUBB,CCT4,TARS2,RAB6B,ABCC6,PDXK,ARF3,CASK,ARF6,RHOA,RAB18,AATK,CSNK1D,STK33,DNM3,SMARCA4,ATP1A1,ATP1A3,ATP2A2,ULK2,YME1L1,ATP2B2,MYO16,KIF1C,PRPS1,ATP6V1A,KATNAL2,KIF1B,SNRK,SRPRA,MAST2,DDX5,DDX6,DD…
GO: Molecular Function	GO:0004862	cAMP-dependent protein kinase inhibitor activity		0.000269	0.4019	0.01086	0.08566	4	9	PPP1R1B,PRKAR1A,PRKAR1B,PRKAR2A
GO: Molecular Function	GO:0031402	sodium ion binding		0.0003008	0.4494	0.01183	0.09327	5	16	SLC24A4,SLC24A2,SCN2A,PDXK,ATP1A1
GO: Molecular Function	GO:0015081	sodium ion transmembrane transporter activity		0.0003484	0.5205	0.01335	0.1053	15	136	SLC24A4,SLC24A2,SCN2A,SCN4B,SLC1A2,SLC6A11,SLC6A13,SLC10A1,SLC20A2,ATP1A1,ATP1A3,ATP1B2,ATP1B3,SLC6A17,SLC17A7
GO: Molecular Function	GO:0008017	microtubule binding		0.000374	0.5587	0.01397	0.1102	20	214	VAPB,VAPA,MAP1A,MAP1B,MAPT,PEX14,EZR,KIF1C,KATNAL2,KIF1B,CKAP5,MAST2,JAKMIP2,KIF2A,KIF3C,MID2,KIF3A,PAFAH1B1,EML1,CASC1
GO: Molecular Function	GO:0051087	chaperone binding		0.0003988	0.5958	0.01453	0.1146	11	82	DNAJA2,CLU,DNAJB2,DNAJA1,AMFR,CP,CDC37L1,ATP1A1,ATP1A3,SOD1,CDC37
GO: Molecular Function	GO:0030235	nitric-oxide synthase regulator activity		0.0004342	0.6487	0.0148	0.1167	4	10	HSP90AA1,HSP90AB1,CALM2,CALM3
GO: Molecular Function	GO:0048306	calcium-dependent protein binding		0.0004351	0.65	0.0148	0.1167	10	70	S100B,SNAP25,DDX5,STX1A,VAMP2,SYN1,SYN2,CALM2,CALM3,GRM4
GO: Molecular Function	GO:0042626	ATPase activity, coupled to transmembrane movement of substances		0.0004358	0.6511	0.0148	0.1167	13	110	ATP6V1D,ABCC6,ATP1A1,ATP1A3,ATP1B2,ATP1B3,ATP2A2,ATP2B2,ATP5PB,ATP6V1A,ATP6V0C,ATP6V0A1,ATP6V0A2
GO: Molecular Function	GO:0043492	ATPase activity, coupled to movement of substances		0.000464	0.6932	0.0154	0.1215	14	125	ATP6V1D,ABCC6,ATP1A1,ATP1A3,ATP1B2,ATP1B3,ATP2A2,ATP2B2,ATP5PB,ATP6V1A,ATP6V0C,ATP6V0A1,ATP11C,ATP6V0A2
GO: Molecular Function	GO:0016887	ATPase activity		0.000509	0.7605	0.01621	0.1279	33	446	CLU,ATP6V1D,HSPA8,HSP90AA1,ABCC6,SMARCA4,ATP1A1,ATP1A3,ATP1B2,ATP1B3,ATP2A2,YME1L1,ATP2B2,KIF1C,ATP5PB,ATP6V1A,ATP6V0C,KATNAL2,ATP6V0A1,KIF1B,DDX5,DDX6,DDX46,ATP11C,KIF2A,KIF3C,DYNC1H1,RFC1,KIF3A,CCNH,LONRF2,CRBN,ATP6V0A2
GO: Molecular Function	GO:0019003	GDP binding		0.00051	0.762	0.01621	0.1279	9	59	RAB11B,RHOA,RAB18,PRPS1,RAB7A,GNAI1,KRAS,RAN,ARL8B
GO: Molecular Function	GO:0005102	signaling receptor binding		0.0005301	0.792	0.0165	0.1301	90	1601	PDPK1,HMGB1,PEX14,CHGB,CHN1,NLGN3,S100B,MFGE8,SEMA6D,NRXN2,SNX6,PIK3R2,UCHL1,PDCL3,PPP1R1B,DNAJA1,HSPA8,CNTF,HSP90AA1,VDR,HSP90AB1,TUBB,APLP1,CPE,MED1,APP,RNF126,YWHAG,MADD,CASK,CRY1,C16orf70,CSNK2B,DNM3,SMARCA4,IPO13,ATP1A3,ATP2A2,ATP2B2,GPRC5B,SEMA3E,LDLRAP1,ARPP19,PSAP,ADAM23,ANKS1B,PANX1,EPS8L1,SEMA3G,ARHGEF11,ITGAV,ITGB1,GFAP,STAT1,DDX5,PTN,CDK5R1,RND1,PTPRD,PTPRF,SCG2,KCNJ10,PLCL2,C1QBP,GNA…
GO: Molecular Function	GO:0030911	TPR domain binding		0.0005943	0.8879	0.01812	0.1429	3	5	PDE2A,HSP90AA1,HSP90AB1
GO: Molecular Function	GO:0031625	ubiquitin protein ligase binding		0.0006235	0.9315	0.01863	0.1469	23	273	CDKN1A,CKB,TUBA1B,UBE2A,UBE2B,UBE2N,CLU,UCHL1,DNAJB2,DNAJA1,HSPA8,EIF4E2,CUL3,TUBB,YWHAE,ERLIN1,PIAS4,PRKAR1A,PRKAR2A,ATP6V0C,DTX1,CASP8,PA2G4
GO: Molecular Function	GO:0008289	lipid binding		0.0006577	0.9826	0.01878	0.1481	46	701	MAP1B,CFL1,CYTH3,ESRRA,HMGB1,MGLL,PAQR6,PFN2,FABP7,MFGE8,SNX6,PITPNA,WDR35,EPN1,HSPA8,VDR,DOC2B,ANXA13,SH3GL2,ID3,CRABP1,ERLIN1,EXOC1,ATP1A1,ATP1A3,UNC13A,LDLRAP1,FNBP1,PSAP,SPTBN2,NCF4,C2CD5,RBP7,ALDH1A2,VAMP2,PLCB1,PCLO,SMURF1,SYT2,SYT7,SNX14,SNX25,RORC,UNC13C,PARD3,HDLBP
GO: Molecular Function	GO:0005391	sodium:potassium-exchanging ATPase activity		0.0006608	0.9872	0.01878	0.1481	4	11	ATP1A1,ATP1A3,ATP1B2,ATP1B3
GO: Molecular Function	GO:0051117	ATPase binding		0.0006663	0.9955	0.01878	0.1481	11	87	CHRNA7,HNRNPK,EZR,ATP1B2,ATP1B3,ATP6V0A1,PEX19,RAB6A,GRIN2A,SVIP,ATP6V0A2
GO: Molecular Function	GO:0044389	ubiquitin-like protein ligase binding		0.0007613	1	0.02106	0.1661	23	277	CDKN1A,CKB,TUBA1B,UBE2A,UBE2B,UBE2N,CLU,UCHL1,DNAJB2,DNAJA1,HSPA8,EIF4E2,CUL3,TUBB,YWHAE,ERLIN1,PIAS4,PRKAR1A,PRKAR2A,ATP6V0C,DTX1,CASP8,PA2G4
GO: Molecular Function	GO:0005509	calcium ion binding		0.0008095	1	0.02199	0.1734	46	708	EPS15,CALR3,KCNIP2,RYR2,RYR3,S100B,SLC24A4,HPCAL1,SLC24A2,MYL6B,PCDH10,DOC2B,VSNL1,FAT3,ANXA13,PPP3CA,PRF1,PLCH2,SCUBE3,SNCB,EPDR1,PLCH1,ATP2A2,ATP2B2,CLSTN3,C2CD5,CDK5R1,NECAB1,CCDC47,SPOCK3,PLCB1,CALB2,CALM2,CALM3,CALU,PCLO,PHF24,PCDHAC2,PCDHAC1,SYT2,SYT7,EML1,CDH2,PCDH8,PCDH9,CDH8
GO: Molecular Function	GO:0003729	mRNA binding		0.0008358	1	0.02215	0.1747	17	179	HNRNPD,HNRNPK,CIRBP,QKI,HSP90AA1,SRSF1,PABPC1,LUC7L,C1QBP,HNRNPLL,CPSF6,TARDBP,DCP1B,CELF3,RBM5,ELAVL1,RPL5
GO: Molecular Function	GO:0019888	protein phosphatase regulator activity		0.0008451	1	0.02215	0.1747	10	76	PPP1R1B,SET,PPP1R1A,PPP2R1B,PPP2R2C,ARPP19,PTN,CALM2,CALM3,RCAN3
GO: Molecular Function	GO:0015662	ATPase activity, coupled to transmembrane movement of ions, phosphorylative mechanism		0.0009195	1	0.02305	0.1818	7	40	ATP1A1,ATP1A3,ATP1B2,ATP1B3,ATP2A2,ATP2B2,ATP6V0C
GO: Molecular Function	GO:0015405	P-P-bond-hydrolysis-driven transmembrane transporter activity		0.0009257	1	0.02305	0.1818	13	119	ATP6V1D,ABCC6,ATP1A1,ATP1A3,ATP1B2,ATP1B3,ATP2A2,ATP2B2,ATP5PB,ATP6V1A,ATP6V0C,ATP6V0A1,ATP6V0A2
GO: Molecular Function	GO:0015399	primary active transmembrane transporter activity		0.0009257	1	0.02305	0.1818	13	119	ATP6V1D,ABCC6,ATP1A1,ATP1A3,ATP1B2,ATP1B3,ATP2A2,ATP2B2,ATP5PB,ATP6V1A,ATP6V0C,ATP6V0A1,ATP6V0A2
GO: Molecular Function	GO:0008556	potassium-transporting ATPase activity		0.00096	1	0.02351	0.1854	4	12	ATP1A1,ATP1A3,ATP1B2,ATP1B3
GO: Molecular Function	GO:0050998	nitric-oxide synthase binding		0.001487	1	0.03582	0.2825	5	22	ACTB,DNM3,CALM2,CALM3,CDH2
GO: Molecular Function	GO:0015075	ion transmembrane transporter activity		0.001554	1	0.03686	0.2907	53	873	PDE2A,CACNA2D2,SLCO2B1,KCNIP2,CHRNA7,RYR2,RYR3,SLC24A4,CLCN7,SLC24A2,SCN2A,SCN4B,UQCRH,PLP2,SLC1A2,ABCC6,SLC6A11,SLC6A13,SLC10A1,SLC20A2,SLC25A1,SNAP25,ATP1A1,ATP1A3,ATP1B2,ATP1B3,ATP2A2,ATP2B2,GABRB2,ATP5PB,ATP6V1A,ATP6V0C,ATP6V0A1,SLC6A17,FXYD6,SLC38A5,PANX1,SERINC2,ITGAV,SLC38A10,KCNJ10,SLC17A7,CACNA1H,GPM6A,CALM2,CALM3,ANO1,GRIA2,GRIA4,GRIN2A,SLC7A7,LRRC8D,ATP6V0A2
GO: Molecular Function	GO:0005093	Rab GDP-dissociation inhibitor activity		0.001656	1	0.03749	0.2957	2	2	GDI1,GDI2
GO: Molecular Function	GO:0002135	CTP binding		0.001656	1	0.03749	0.2957	2	2	HSP90AA1,HSP90AB1
GO: Molecular Function	GO:0033149	FFAT motif binding		0.001656	1	0.03749	0.2957	2	2	VAPB,VAPA
GO: Molecular Function	GO:0019905	syntaxin binding		0.001797	1	0.03923	0.3094	11	98	VAMP3,DOC2B,NAPB,SNAP25,STX10,UNC13A,NAPG,VAMP2,SCFD1,SYT2,SYT7
GO: Molecular Function	GO:0048156	tau protein binding		0.001822	1	0.03923	0.3094	4	14	S100B,HSP90AA1,BIN1,DYRK1A
GO: Molecular Function	GO:0042623	ATPase activity, coupled		0.001835	1	0.03923	0.3094	25	332	ATP6V1D,HSPA8,ABCC6,SMARCA4,ATP1A1,ATP1A3,ATP1B2,ATP1B3,ATP2A2,YME1L1,ATP2B2,ATP5PB,ATP6V1A,ATP6V0C,KATNAL2,ATP6V0A1,DDX5,DDX6,DDX46,ATP11C,RFC1,CCNH,LONRF2,CRBN,ATP6V0A2
GO: Molecular Function	GO:0031420	alkali metal ion binding		0.001838	1	0.03923	0.3094	5	23	SLC24A4,SLC24A2,SCN2A,PDXK,ATP1A1
GO: Molecular Function	GO:0035254	glutamate receptor binding		0.002147	1	0.04518	0.3563	7	46	C16orf70,DNM3,ATP2B2,GNAS,CALM2,CALM3,GRIN2A
GO: Molecular Function	GO:0022857	transmembrane transporter activity		0.002298	1	0.04769	0.3761	59	1014	PDE2A,CACNA2D2,SLCO2B1,KCNIP2,CHRNA7,RYR2,RYR3,SLC24A4,CLCN7,SLC24A2,ATP6V1D,SCN2A,SCN4B,UQCRH,PLP2,SLC1A2,ABCC6,SLC6A11,SLC6A13,SLC10A1,PRF1,SLC20A2,SLC25A1,SNAP25,ATP1A1,ATP1A3,ATP1B2,ATP1B3,ATP2A2,ATP2B2,GABRB2,ATP5PB,ATP6V1A,ATP6V0C,ATP6V0A1,SLC6A17,FXYD6,SLC38A5,PANX1,SERINC2,ITGAV,SLC38A10,SV2A,KCNJ10,SLC17A7,CACNA1H,SLC29A4,GPM6A,CALM2,CALM3,ANO1,GRIA2,GRIA4,GRIN2A,SLC7A7,LRRC8D,SLC25A36,M…
GO: Molecular Function	GO:0015085	calcium ion transmembrane transporter activity		0.002385	1	0.04858	0.3831	13	132	PDE2A,CACNA2D2,RYR2,RYR3,SLC24A4,SLC24A2,ATP2A2,ATP2B2,PANX1,ITGAV,CACNA1H,GPM6A,GRIN2A
GO: Molecular Function	GO:0030955	potassium ion binding		0.002406	1	0.04858	0.3831	4	15	SLC24A4,SLC24A2,PDXK,ATP1A1

## Sheet: GO Biological Process
Category	ID	Name	Source	p-value	q-value Bonferroni	q-value FDR B&H	q-value FDR B&Y	Hit Count in Query List	Hit Count in Genome	Hit in Query List
GO: Biological Process	GO:0099536	synaptic signaling		2.266e-21	1.319e-17	1.319e-17	1.22e-16	86	687	DLGAP1,ABAT,CACNA2D2,MAPT,MBP,RTN3,MGLL,PFN2,KCNIP2,COLQ,CHRM4,CHRNA7,HNRNPK,NLGN3,S100B,NRXN2,ATXN1,SLC24A2,LRFN5,HRAS,HSPA8,DOC2B,MPZ,MINK1,PPFIA3,SLC1A2,YWHAG,CASK,SLC6A11,SLC6A13,PPP3CA,NAPB,RIMS4,RIMS1,SNAP25,SNCB,ATP2A2,ATP2B2,UNC13A,GABRB2,CLSTN3,KIF1B,SPTBN2,GFAP,STAU1,SYNGAP1,PTN,CDK5R1,STX1A,GRID2IP,PTPRD,PTPRF,PTPRN2,SV2A,KCNJ10,PLCL2,VAMP2,GLUL,MTMR2,PLCB1,SYN1,SLC17A7,SYN2,GNAI1,GNAI…
GO: Biological Process	GO:0007268	chemical synaptic transmission		5.004e-20	2.913e-16	7.281e-17	6.733e-16	83	678	DLGAP1,ABAT,CACNA2D2,MAPT,MBP,RTN3,MGLL,PFN2,KCNIP2,COLQ,CHRM4,CHRNA7,HNRNPK,NLGN3,S100B,NRXN2,ATXN1,SLC24A2,LRFN5,HRAS,HSPA8,DOC2B,MPZ,MINK1,PPFIA3,SLC1A2,YWHAG,CASK,SLC6A11,SLC6A13,PPP3CA,NAPB,RIMS4,RIMS1,SNAP25,SNCB,ATP2A2,ATP2B2,UNC13A,GABRB2,CLSTN3,KIF1B,SPTBN2,GFAP,STAU1,SYNGAP1,PTN,STX1A,GRID2IP,PTPRD,PTPRF,PTPRN2,SV2A,KCNJ10,PLCL2,VAMP2,GLUL,MTMR2,SYN1,SLC17A7,SYN2,GNAI1,GNAI2,KIT,KRAS,NP…
GO: Biological Process	GO:0099537	trans-synaptic signaling		5.004e-20	2.913e-16	7.281e-17	6.733e-16	83	678	DLGAP1,ABAT,CACNA2D2,MAPT,MBP,RTN3,MGLL,PFN2,KCNIP2,COLQ,CHRM4,CHRNA7,HNRNPK,NLGN3,S100B,NRXN2,ATXN1,SLC24A2,LRFN5,HRAS,HSPA8,DOC2B,MPZ,MINK1,PPFIA3,SLC1A2,YWHAG,CASK,SLC6A11,SLC6A13,PPP3CA,NAPB,RIMS4,RIMS1,SNAP25,SNCB,ATP2A2,ATP2B2,UNC13A,GABRB2,CLSTN3,KIF1B,SPTBN2,GFAP,STAU1,SYNGAP1,PTN,STX1A,GRID2IP,PTPRD,PTPRF,PTPRN2,SV2A,KCNJ10,PLCL2,VAMP2,GLUL,MTMR2,SYN1,SLC17A7,SYN2,GNAI1,GNAI2,KIT,KRAS,NP…
GO: Biological Process	GO:0098916	anterograde trans-synaptic signaling		5.004e-20	2.913e-16	7.281e-17	6.733e-16	83	678	DLGAP1,ABAT,CACNA2D2,MAPT,MBP,RTN3,MGLL,PFN2,KCNIP2,COLQ,CHRM4,CHRNA7,HNRNPK,NLGN3,S100B,NRXN2,ATXN1,SLC24A2,LRFN5,HRAS,HSPA8,DOC2B,MPZ,MINK1,PPFIA3,SLC1A2,YWHAG,CASK,SLC6A11,SLC6A13,PPP3CA,NAPB,RIMS4,RIMS1,SNAP25,SNCB,ATP2A2,ATP2B2,UNC13A,GABRB2,CLSTN3,KIF1B,SPTBN2,GFAP,STAU1,SYNGAP1,PTN,STX1A,GRID2IP,PTPRD,PTPRF,PTPRN2,SV2A,KCNJ10,PLCL2,VAMP2,GLUL,MTMR2,SYN1,SLC17A7,SYN2,GNAI1,GNAI2,KIT,KRAS,NP…
GO: Biological Process	GO:0016192	vesicle-mediated transport		3.746e-14	2.181e-10	3.738e-11	3.456e-10	122	1514	VAPB,VAPA,SNF8,EPS15,RAB11B,ARL17B,CLTCL1,COPZ2,CYTH3,PDPK1,TRAPPC5,ACTB,COPB2,RTN3,HMGB1,CHGA,BTBD9,PFN2,CHRNA7,HNRNPK,VAMP3,NLGN3,MFGE8,SERPINA1,AP2S1,SNX6,CLU,PIK3R2,HRAS,MICAL3,EPN1,SCARA3,ARHGAP21,HSPA8,HSP90AA1,HSP90AB1,DOC2B,CUL3,EZR,BIN1,VSNL1,COPZ1,COPG1,ANXA13,SH3GL2,APLP1,APLP2,COPG2,APP,RAB6B,RNF126,CDC37L1,ARF3,ARF6,C16orf70,NAPB,CSNK1D,SCG3,RIMS4,DNM3,EXOC1,RIMS1,SNAP25,STX10,ATP2A2…
GO: Biological Process	GO:0007267	cell-cell signaling		3.853e-14	2.243e-10	3.738e-11	3.456e-10	106	1233	DLGAP1,RAB11B,ABAT,PDE4C,CACNA2D2,MAPT,MBP,RTN3,MGLL,PFN2,KCNIP2,COLQ,CHRM4,CHRNA7,HNRNPK,RYR2,VAMP3,NLGN3,S100B,NRXN2,SNX6,ATXN1,SLC24A2,LRFN5,SCN4B,HRAS,MAP4K4,HSPA8,CNTF,DOC2B,MPZ,VSNL1,MINK1,PPFIA3,SLC1A2,YWHAG,MADD,CASK,CRY1,SLC6A11,SLC6A13,PPP3CA,NAPB,RIMS4,RIMS1,SNAP25,SNCB,ATP2A2,ATP2B2,UNC13A,GABRB2,CLSTN3,MYT1,KIF1B,SPTBN2,PANX1,GFAP,ENY2,STAU1,SYNGAP1,PTN,CDK5R1,STX1A,GRID2IP,PTPRD,PTP…
GO: Biological Process	GO:0050804	modulation of chemical synaptic transmission		6.224e-13	3.623e-09	5.176e-10	4.786e-09	47	357	ABAT,CACNA2D2,MAPT,MGLL,PFN2,CHRNA7,HNRNPK,NLGN3,S100B,SLC24A2,HRAS,MINK1,PPFIA3,YWHAG,PPP3CA,NAPB,RIMS4,RIMS1,SNAP25,ATP2A2,ATP2B2,UNC13A,CLSTN3,GFAP,STAU1,SYNGAP1,PTN,STX1A,GRID2IP,KCNJ10,PLCL2,VAMP2,GLUL,MTMR2,SYN1,GNAI1,GNAI2,KIT,KRAS,GRIA2,GRIA4,GRIN2A,GRM3,GRM4,SHISA7,SHISA9,DGKI
GO: Biological Process	GO:0051640	organelle localization		7.171e-12	4.174e-08	5.218e-09	4.824e-08	56	510	RAB11B,MAP1B,MAPT,PDPK1,TRAPPC5,PEX14,CHGA,BTBD9,PFN2,VAMP3,NLGN3,SERPINA1,UBE2B,SNX6,UCHL1,ARHGAP21,DOC2B,CUL3,EZR,COPG1,SH3GL2,TMEM106B,NAPB,FEZ1,CSNK1D,RIMS4,RIMS1,SNAP25,ATP2A2,UNC13A,KIF1B,SPTBN2,EIF6,STX1A,VPS33B,VAMP2,SYN1,RABGEF1,TACC1,KIF3C,SCFD1,KIT,RAB6A,DYNC1H1,RAN,SYNE1,PCLO,SYT2,MEI1,SYT7,KIF3A,PAFAH1B1,CD59,DCTN4,PARD3,CDH2
GO: Biological Process	GO:0051656	establishment of organelle localization		2.453e-11	1.428e-07	1.587e-08	1.467e-07	50	438	RAB11B,MAP1B,MAPT,PDPK1,TRAPPC5,PEX14,CHGA,BTBD9,PFN2,VAMP3,SERPINA1,UBE2B,SNX6,UCHL1,ARHGAP21,DOC2B,CUL3,EZR,COPG1,SH3GL2,NAPB,FEZ1,CSNK1D,RIMS4,RIMS1,SNAP25,ATP2A2,UNC13A,KIF1B,SPTBN2,EIF6,STX1A,VAMP2,SYN1,RABGEF1,KIF3C,SCFD1,KIT,RAB6A,DYNC1H1,RAN,SYNE1,PCLO,SYT2,MEI1,SYT7,KIF3A,PAFAH1B1,CD59,DCTN4
GO: Biological Process	GO:0031175	neuron projection development		3.991e-11	2.323e-07	2.323e-08	2.148e-07	82	953	VAPA,MAP1B,MAPT,CFL1,MBP,ACTB,HMGB1,MGLL,CHN1,PLXNB2,HNRNPK,NLGN3,S100B,SEMA6D,CLU,LRFN5,UCHL1,HPRT1,HRAS,UGT8,LRRC7,QKI,MAP4K4,CNTF,EZR,ISLR2,FAT3,MINK1,GAS7,APP,ARF6,RHOA,TMEM106B,ARHGAP4,IFRD1,AATK,PPP3CA,TENM3,FEZ1,UNC5C,DNM3,RIMS1,SNAP25,ULK2,NDRG4,UNC13A,MYO16,GPRC5B,SEMA3E,SPTBN2,SEMA3G,COL25A1,GDI1,ITGB1,GFAP,SYNGAP1,PTN,STMN4,CDK5R1,PTPRD,PTPRF,PTPRO,KIF3C,ROBO3,KRAS,GPM6A,DPYSL3,NPTX1,N…
GO: Biological Process	GO:0010975	regulation of neuron projection development		5.499e-11	3.201e-07	2.682e-08	2.48e-07	53	492	MAP1B,MAPT,CFL1,MBP,MGLL,CHN1,PLXNB2,HNRNPK,NLGN3,SEMA6D,LRRC7,QKI,MAP4K4,CNTF,ISLR2,FAT3,ARF6,RHOA,TMEM106B,ARHGAP4,IFRD1,AATK,PPP3CA,TENM3,FEZ1,DNM3,RIMS1,SNAP25,ULK2,NDRG4,UNC13A,GPRC5B,SEMA3E,SEMA3G,GDI1,ITGB1,GFAP,SYNGAP1,PTN,CDK5R1,PTPRD,PTPRF,PTPRO,KIF3C,DPYSL3,NEDD4L,SYNE1,L1CAM,SMURF1,SYT2,ARHGAP35,PAFAH1B1,CDH2
GO: Biological Process	GO:0022008	neurogenesis		5.528e-11	3.218e-07	2.682e-08	2.48e-07	119	1628	VAPA,MAP1B,MAPT,CFL1,MBP,ACTB,HMGB1,MGLL,CHN1,KCNIP2,PLXNB2,HNRNPK,FABP7,NLGN3,S100B,SEMA6D,ATXN1,CLU,LRFN5,UCHL1,HPRT1,HRAS,UGT8,LRRC7,QKI,MAP4K4,ZBTB18,CNTF,HSP90AA1,EZR,ISLR2,BIN1,FAT3,MINK1,ID3,GAS7,IRX3,MED1,APP,YWHAE,YWHAG,ARF6,RHOA,TMEM106B,ARHGAP4,SRRT,IFRD1,AATK,PPP3CA,TENM3,FEZ1,UNC5C,DNM3,SMARCA4,RIMS1,SNAP25,FAIM2,ULK2,ATP2B2,NDRG4,UNC13A,MYO16,SOD1,GPRC5B,SEMA3E,GABRB2,SPTBN2,BRINP1,…
GO: Biological Process	GO:0048666	neuron development		1.172e-10	6.823e-07	5.248e-08	4.853e-07	90	1114	VAPA,MAP1B,MAPT,CFL1,MBP,ACTB,HMGB1,MGLL,CHN1,KCNIP2,PLXNB2,HNRNPK,NLGN3,S100B,SEMA6D,CLU,LRFN5,UCHL1,HPRT1,HRAS,UGT8,LRRC7,QKI,MAP4K4,ZBTB18,CNTF,EZR,ISLR2,FAT3,MINK1,GAS7,APP,ARF6,RHOA,TMEM106B,ARHGAP4,IFRD1,AATK,PPP3CA,TENM3,FEZ1,UNC5C,DNM3,RIMS1,SNAP25,ULK2,ATP2B2,NDRG4,UNC13A,MYO16,SOD1,GPRC5B,SEMA3E,GABRB2,SPTBN2,SEMA3G,COL25A1,GDI1,ITGB1,GFAP,SYNGAP1,PTN,STMN4,CDK5R1,RND1,PTPRD,PTPRF,PTPRO…
GO: Biological Process	GO:0048812	neuron projection morphogenesis		1.556e-10	9.056e-07	6.469e-08	5.981e-07	61	630	MAP1B,MAPT,CFL1,MBP,ACTB,MGLL,CHN1,PLXNB2,HNRNPK,NLGN3,S100B,SEMA6D,CLU,LRFN5,UCHL1,HPRT1,HRAS,UGT8,EZR,ISLR2,MINK1,GAS7,APP,RHOA,TMEM106B,ARHGAP4,IFRD1,AATK,PPP3CA,FEZ1,UNC5C,DNM3,RIMS1,ULK2,UNC13A,MYO16,SEMA3E,SPTBN2,SEMA3G,COL25A1,GDI1,ITGB1,SYNGAP1,CDK5R1,PTPRD,PTPRF,PTPRO,ROBO3,KRAS,GPM6A,NPTX1,NEDD4L,SYNE1,L1CAM,SMURF1,STMN1,SYT2,EFNB1,PAFAH1B1,PARD3,CDH2
GO: Biological Process	GO:0051960	regulation of nervous system development		1.959e-10	1.14e-06	7.602e-08	7.029e-07	76	881	LRRC24,MAP1B,MAPT,CFL1,MBP,LRTM1,MGLL,CHN1,COLQ,PLXNB2,HNRNPK,NLGN3,SEMA6D,ATXN1,LRRC7,QKI,MAP4K4,CNTF,ISLR2,BIN1,FAT3,CPE,IRX3,MED1,APP,YWHAG,ARF6,RHOA,TMEM106B,ARHGAP4,SRRT,IFRD1,AATK,PPP3CA,TENM3,FEZ1,DNM3,RIMS1,SNAP25,ULK2,NDRG4,UNC13A,GPRC5B,SEMA3E,CLSTN3,BRINP1,SEMA3G,GDI1,ITGB1,GFAP,DDX6,SYNGAP1,PTN,CDK5R1,PTPRD,PTPRF,PTPRO,MTMR2,KIF3C,KIT,MYRF,DPYSL3,NEDD4L,DTX1,SYNE1,L1CAM,SMURF1,C16orf4…
GO: Biological Process	GO:0045664	regulation of neuron differentiation		2.743e-10	1.597e-06	9.979e-08	9.227e-07	62	655	MAP1B,MAPT,CFL1,MBP,MGLL,CHN1,PLXNB2,HNRNPK,NLGN3,SEMA6D,LRRC7,QKI,MAP4K4,CNTF,ISLR2,BIN1,FAT3,IRX3,MED1,APP,YWHAG,ARF6,RHOA,TMEM106B,ARHGAP4,IFRD1,AATK,PPP3CA,TENM3,FEZ1,DNM3,RIMS1,SNAP25,ULK2,NDRG4,UNC13A,GPRC5B,SEMA3E,BRINP1,SEMA3G,GDI1,ITGB1,GFAP,DDX6,SYNGAP1,PTN,CDK5R1,PTPRD,PTPRF,PTPRO,KIF3C,DPYSL3,NEDD4L,DTX1,SYNE1,L1CAM,SMURF1,SPAG9,SYT2,ARHGAP35,PAFAH1B1,CDH2
GO: Biological Process	GO:0031344	regulation of cell projection organization		3.102e-10	1.805e-06	1.062e-07	9.82e-07	62	657	MAP1B,MAPT,CFL1,MBP,MGLL,PFN2,CHN1,PLXNB2,HNRNPK,NLGN3,SEMA6D,HRAS,LRRC7,QKI,MAP4K4,CNTF,HSP90AA1,EZR,ISLR2,FAT3,ARF6,RHOA,TMEM106B,ARHGAP4,IFRD1,AATK,PPP3CA,TENM3,FEZ1,DNM3,RIMS1,SNAP25,ULK2,NDRG4,UNC13A,GPRC5B,SEMA3E,NCKAP1,EPS8L1,SEMA3G,GDI1,ITGB1,GFAP,SYNGAP1,PTN,CDK5R1,PTPRD,PTPRF,PTPRO,KIF3C,KIT,GPM6A,DPYSL3,NEDD4L,SYNE1,L1CAM,SMURF1,SYT2,ARHGAP35,ARPC2,PAFAH1B1,CDH2
GO: Biological Process	GO:0048699	generation of neurons		3.981e-10	2.317e-06	1.218e-07	1.126e-06	111	1528	VAPA,MAP1B,MAPT,CFL1,MBP,ACTB,HMGB1,MGLL,CHN1,KCNIP2,PLXNB2,HNRNPK,NLGN3,S100B,SEMA6D,ATXN1,CLU,LRFN5,UCHL1,HPRT1,HRAS,UGT8,LRRC7,QKI,MAP4K4,ZBTB18,CNTF,HSP90AA1,EZR,ISLR2,BIN1,FAT3,MINK1,ID3,GAS7,IRX3,MED1,APP,YWHAE,YWHAG,ARF6,RHOA,TMEM106B,ARHGAP4,SRRT,IFRD1,AATK,PPP3CA,TENM3,FEZ1,UNC5C,DNM3,RIMS1,SNAP25,FAIM2,ULK2,ATP2B2,NDRG4,UNC13A,MYO16,SOD1,GPRC5B,SEMA3E,GABRB2,SPTBN2,BRINP1,SEMA3G,COL25A1…
GO: Biological Process	GO:0006836	neurotransmitter transport		4.153e-10	2.418e-06	1.218e-07	1.126e-06	31	212	PFN2,NRXN2,HSPA8,DOC2B,PPFIA3,CASK,SLC6A11,SLC6A13,NAPB,RIMS4,RIMS1,SNAP25,ATP2A2,UNC13A,SLC6A17,SPTBN2,GFAP,STX1A,PTPRN2,SV2A,KCNJ10,VAMP2,GLUL,SYN1,SLC17A7,SYN2,PCLO,SYT2,GRM4,SYT7,DGKI
GO: Biological Process	GO:0030182	neuron differentiation		4.186e-10	2.436e-06	1.218e-07	1.126e-06	104	1398	VAPA,MAP1B,MAPT,CFL1,MBP,ACTB,HMGB1,MGLL,CHN1,KCNIP2,PLXNB2,HNRNPK,NLGN3,S100B,SEMA6D,CLU,LRFN5,UCHL1,HPRT1,HRAS,UGT8,LRRC7,QKI,MAP4K4,ZBTB18,CNTF,EZR,ISLR2,BIN1,FAT3,MINK1,ID3,GAS7,IRX3,MED1,APP,YWHAG,ARF6,RHOA,TMEM106B,ARHGAP4,IFRD1,AATK,PPP3CA,TENM3,FEZ1,UNC5C,DNM3,RIMS1,SNAP25,FAIM2,ULK2,ATP2B2,NDRG4,UNC13A,MYO16,SOD1,GPRC5B,SEMA3E,GABRB2,SPTBN2,BRINP1,SEMA3G,COL25A1,GDI1,ITGB1,GFAP,MYEF2,DDX…
GO: Biological Process	GO:0061024	membrane organization		4.767e-10	2.775e-06	1.321e-07	1.222e-06	87	1091	RPL21,VAPB,RPL22,VAPA,SNF8,EPS15,RAB11B,PDPK1,TRAPPC5,MBP,RPS9,RPS17,RPS27A,KCNIP2,COLQ,VAMP3,NLGN3,MFGE8,SERPINA1,AP2S1,NRXN2,CLU,PIK3R2,HSPA8,HSP90AA1,DOC2B,CUL3,EZR,ANXA13,CPE,YWHAB,YWHAE,YWHAG,ARF6,C16orf70,NAPB,CSNK1D,RIMS1,SNAP25,ATP1B3,STX10,ATP2A2,SOD1,LDLRAP1,NAPG,SRPRA,GDI1,ITGB1,ELMO1,C2CD5,SYNGAP1,PTN,CDK5R1,STX1A,TSPAN17,BNIP3L,PTPRD,VPS33B,VAMP1,VAMP2,PEX19,RAB7A,ATP11C,RABGEF1,SCFD…
GO: Biological Process	GO:0050803	regulation of synapse structure or activity		1.084e-09	6.313e-06	2.869e-07	2.653e-06	35	272	LRRC24,MAPT,LRTM1,MGLL,COLQ,HNRNPK,NLGN3,S100B,SLC24A2,HRAS,PPFIA3,APP,YWHAG,RIMS1,SNAP25,ATP2B2,UNC13A,CLSTN3,GFAP,STAU1,SYNGAP1,PTN,GRID2IP,PTPRF,KCNJ10,VAMP2,KIT,KRAS,LRRC4B,GRIN2A,CBLN1,SHISA7,SHISA9,DGKI,CDH2
GO: Biological Process	GO:0001505	regulation of neurotransmitter levels		2.222e-09	1.294e-05	5.624e-07	5.2e-06	30	214	ABAT,PFN2,COLQ,NRXN2,ALDH9A1,HSPA8,DOC2B,PPFIA3,CASK,NAPB,RIMS4,RIMS1,SNAP25,ATP2A2,UNC13A,SPTBN2,GFAP,STX1A,PTPRN2,KCNJ10,VAMP2,GLUL,SYN1,SLC17A7,SYN2,PCLO,SYT2,GRM4,SYT7,DGKI
GO: Biological Process	GO:0006887	exocytosis		2.408e-09	1.402e-05	5.84e-07	5.4e-06	46	438	SNF8,RAB11B,PDPK1,CHGA,PFN2,VAMP3,SERPINA1,SNX6,CLU,MICAL3,DOC2B,VSNL1,APLP2,APP,CDC37L1,NAPB,SCG3,RIMS4,EXOC1,RIMS1,SNAP25,ATP2A2,UNC13A,SOD1,PSAP,SPTBN2,STX1A,VPS33B,VAMP1,VAMP2,PLCB1,SYN1,RAB7A,RABGEF1,CACNA1H,SCFD1,KIT,CALM2,CALM3,PCLO,SYT2,SYT7,CD9,TMSB4X,UNC13C,HCK
GO: Biological Process	GO:0048167	regulation of synaptic plasticity		3.587e-09	2.088e-05	8.352e-07	7.723e-06	26	169	MAPT,MGLL,HNRNPK,NLGN3,S100B,SLC24A2,HRAS,PPFIA3,YWHAG,RIMS1,SNAP25,ATP2B2,UNC13A,GFAP,STAU1,SYNGAP1,PTN,GRID2IP,KCNJ10,VAMP2,KIT,KRAS,GRIN2A,SHISA7,SHISA9,DGKI
GO: Biological Process	GO:0045055	regulated exocytosis		4.632e-09	2.696e-05	1.037e-06	9.589e-06	37	315	RAB11B,PDPK1,CHGA,PFN2,VAMP3,SERPINA1,SNX6,CLU,DOC2B,APLP2,APP,CDC37L1,NAPB,SCG3,RIMS4,RIMS1,SNAP25,ATP2A2,UNC13A,SOD1,PSAP,SPTBN2,STX1A,VAMP2,PLCB1,SYN1,RABGEF1,CACNA1H,KIT,CALM2,CALM3,PCLO,SYT2,SYT7,CD9,TMSB4X,HCK
GO: Biological Process	GO:0070727	cellular macromolecule localization		5.19e-09	3.021e-05	1.119e-06	1.035e-05	115	1676	RPL21,CDKN1A,RPL22,VAPA,SNF8,RAB11B,PDE2A,CLTCL1,COPZ2,HK1,CFL1,PDPK1,RPS9,COPB2,RPS17,U2AF2,PEX14,RPS27A,COLQ,ZDHHC3,HNRNPK,RYR2,BAP1,VAMP3,AP2S1,NRXN2,SNX6,PIK3R2,ATP6V1D,WDR35,UGT8,DNAJA1,HSPA8,HSP90AA1,HSP90AB1,TOM1L2,EZR,FLNB,IPO7,COPZ1,COPG1,CTDSPL2,ANXA13,COPG2,CCT4,CPE,MED1,YWHAB,YWHAE,YWHAG,ZIC1,CASK,ARF6,RHOA,C16orf70,PPP3CA,NAPB,CSNK1D,IPO13,EXOC1,SUMO3,RIMS1,LZTS2,ATP1B3,STX10,LDLRAP1…
GO: Biological Process	GO:0007417	central nervous system development		5.41e-09	3.149e-05	1.125e-06	1.04e-05	79	1002	ABAT,MAPT,MBP,ACTB,EZH1,PLXNB2,NDRG2,HNRNPD,HNRNPK,FABP7,CKB,NLGN3,S100B,SEMA6D,CLU,HPRT1,UGT8,QKI,ZBTB18,CNTF,BIN1,SH3GL2,ID3,APLP1,APLP2,MED1,APP,SLC1A2,YWHAE,MBD3,ZIC1,HAPLN1,RHOA,SLC6A11,RAB18,AATK,UNC5C,SMARCA4,FAIM2,ATP2B2,NDRG4,MYO16,B4GALT2,ATP5PB,NCKAP1,ADAM23,SLC6A17,SPTBN2,ITGB1,GFAP,PTN,CDK5R1,ALDH1A2,NFIX,KCNJ10,PLCB1,SLC17A7,TACC1,MYRF,KRAS,RAN,NPTX1,CALM2,CALM3,C16orf45,STMN1,ARHGA…
GO: Biological Process	GO:0051049	regulation of transport		5.696e-09	3.315e-05	1.143e-06	1.057e-05	130	1975	CDKN1A,SNF8,RAB11B,ABAT,PDE2A,PDE4C,CLTCL1,HK1,MAP1B,CACNA2D2,MAPT,PDPK1,HMGB1,U2AF2,CHGA,BTBD9,PFN2,KCNIP2,CHRNA7,HNRNPK,RYR2,BAP1,VAMP3,NLGN3,MFGE8,AP2S1,CLCN7,SNX6,PIK3R2,SCN2A,SCN4B,AK1,DNAJA1,MAP4K4,ARHGAP21,HSPA8,CNTF,HSP90AA1,VDR,HSP90AB1,DOC2B,EZR,BIN1,VSNL1,CTDSPL2,ANXA13,MINK1,SH3GL2,NDFIP2,MED1,YWHAB,SLC1A2,YWHAE,YWHAG,MADD,ZIC1,CASK,ARF6,CRY1,RHOA,PPP3CA,NAPB,RIMS4,EXOC1,ATF4,RIMS1,SN…
GO: Biological Process	GO:0034613	cellular protein localization		7.153e-09	4.163e-05	1.388e-06	1.283e-05	114	1666	RPL21,CDKN1A,RPL22,VAPA,SNF8,RAB11B,PDE2A,CLTCL1,COPZ2,HK1,CFL1,PDPK1,RPS9,COPB2,RPS17,U2AF2,PEX14,RPS27A,COLQ,ZDHHC3,HNRNPK,RYR2,BAP1,VAMP3,AP2S1,NRXN2,SNX6,PIK3R2,ATP6V1D,WDR35,UGT8,DNAJA1,HSPA8,HSP90AA1,HSP90AB1,TOM1L2,EZR,FLNB,IPO7,COPZ1,COPG1,CTDSPL2,ANXA13,COPG2,CCT4,CPE,MED1,YWHAB,YWHAE,YWHAG,ZIC1,CASK,ARF6,RHOA,C16orf70,PPP3CA,NAPB,CSNK1D,IPO13,EXOC1,SUMO3,RIMS1,LZTS2,ATP1B3,STX10,LDLRAP1…
GO: Biological Process	GO:0015031	protein transport		8.521e-09	4.96e-05	1.598e-06	1.478e-05	128	1948	RPL21,CDKN1A,RPL22,SNF8,EPS15,RAB11B,ABAT,PDE2A,PDE4C,ARL17B,CLTCL1,COPZ2,CACNA2D2,CFL1,RPS9,COPB2,HMGB1,RPS17,U2AF2,PEX14,RPS27A,ZDHHC3,BAP1,VAMP3,AP2S1,SNX6,CLU,SLC7A6OS,PIK3R2,ATP6V1D,WDR35,DNAJA1,MAP4K4,HSPA8,HSP90AA1,AGAP2,HSP90AB1,DOC2B,TOM1L2,EZR,VSNL1,IPO7,COPZ1,COPG1,CTDSPL2,AHCTF1,ANXA13,NDFIP2,COPG2,MED1,RAB6B,YWHAB,YWHAE,YWHAG,MADD,ARF3,ZIC1,CASK,ARF6,RHOA,C16orf70,RAB18,PPP3CA,NAPB,I…
GO: Biological Process	GO:0050767	regulation of neurogenesis		8.784e-09	5.113e-05	1.598e-06	1.478e-05	66	784	MAP1B,MAPT,CFL1,MBP,MGLL,CHN1,PLXNB2,HNRNPK,NLGN3,SEMA6D,ATXN1,LRRC7,QKI,MAP4K4,CNTF,ISLR2,BIN1,FAT3,IRX3,MED1,APP,YWHAG,ARF6,RHOA,TMEM106B,ARHGAP4,SRRT,IFRD1,AATK,PPP3CA,TENM3,FEZ1,DNM3,RIMS1,SNAP25,ULK2,NDRG4,UNC13A,GPRC5B,SEMA3E,BRINP1,SEMA3G,GDI1,ITGB1,GFAP,DDX6,SYNGAP1,PTN,CDK5R1,PTPRD,PTPRF,PTPRO,KIF3C,KIT,DPYSL3,NEDD4L,DTX1,SYNE1,L1CAM,SMURF1,C16orf45,SPAG9,SYT2,ARHGAP35,PAFAH1B1,CDH2
GO: Biological Process	GO:0060627	regulation of vesicle-mediated transport		1.199e-08	6.978e-05	2.114e-06	1.955e-05	49	508	SNF8,RAB11B,PDPK1,HMGB1,BTBD9,PFN2,HNRNPK,VAMP3,MFGE8,AP2S1,SNX6,ARHGAP21,HSPA8,DOC2B,EZR,BIN1,VSNL1,ANXA13,SH3GL2,ARF6,NAPB,RIMS4,RIMS1,ATP2A2,NDRG4,UNC13A,LDLRAP1,ITGAV,ITGB1,C2CD5,STX1A,RAB4B,PTX3,VAMP2,MTMR2,PLCB1,SYN1,RAB7A,RABGEF1,CACNA1H,SCFD1,NEDD4L,SYNE1,PCLO,SYT2,SYT7,KIF3A,PARD3,HCK
GO: Biological Process	GO:0030030	cell projection organization		1.858e-08	0.0001082	3.182e-06	2.942e-05	100	1423	VAPA,MAP1B,MAPT,CFL1,MBP,ACTB,HMGB1,MGLL,PFN2,CHN1,PLXNB2,HNRNPK,NLGN3,S100B,UBE2B,SEMA6D,CLU,LRFN5,UCHL1,HPRT1,ATP6V1D,HRAS,WDR35,UGT8,LRRC7,QKI,MAP4K4,CNTF,HSP90AA1,CUL3,EZR,ISLR2,FAT3,MINK1,GAS7,APP,ARF6,RHOA,TMEM106B,ARHGAP4,IFRD1,AATK,PPP3CA,TENM3,FEZ1,CSNK1D,UNC5C,DNM3,TTC17,RIMS1,SNAP25,ULK2,ATP2B2,NDRG4,UNC13A,MYO16,SOD1,GPRC5B,SEMA3E,NCKAP1,SPTBN2,EPS8L1,SEMA3G,COL25A1,GDI1,ITGB1,GFAP,SY…
GO: Biological Process	GO:0090150	establishment of protein localization to membrane		2.031e-08	0.0001183	3.379e-06	3.124e-05	40	377	RPL21,RPL22,RAB11B,PDPK1,RPS9,RPS17,RPS27A,COLQ,VAMP3,PIK3R2,HSP90AA1,EZR,ANXA13,YWHAB,YWHAE,YWHAG,ARF6,C16orf70,LDLRAP1,SRPRA,GDI1,ITGB1,C2CD5,CDK5R1,TSPAN17,VAMP2,PEX19,RABGEF1,SFN,DPP6,SMURF1,CASP8,FIS1,TSPAN5,NDUFA13,GOLGA7,ROCK1,PARD3,CDH2,RPL5
GO: Biological Process	GO:0032989	cellular component morphogenesis		2.378e-08	0.0001384	3.846e-06	3.556e-05	100	1430	MAP1B,MAPT,CFL1,MBP,ACTB,MGLL,CHN1,PLXNB2,HNRNPK,KLF2,VAMP3,NLGN3,S100B,UBE2B,SEMA6D,CLU,LRFN5,UCHL1,HPRT1,ATP6V1D,HRAS,WDR35,UGT8,VDR,CUL3,EZR,ISLR2,FLNB,NEBL,FAT3,MINK1,GAS7,MED1,APP,RHOA,TMEM106B,ARHGAP4,IFRD1,AATK,PPP3CA,FEZ1,CSNK1D,UNC5C,DNM3,PRKAR1A,SMARCA4,RIMS1,ULK2,ATP2B2,UNC13A,MYO16,SOD1,SEMA3E,SPTBN2,PBLD,SEMA3G,PALMD,COL25A1,LARP4,ITGAV,GDI1,ITGB1,STAT1,SYNGAP1,PTN,CDK5R1,PTPRD,PTPRF…
GO: Biological Process	GO:0000902	cell morphogenesis		2.605e-08	0.0001516	4.098e-06	3.79e-05	95	1337	MAP1B,MAPT,CFL1,MBP,ACTB,MGLL,CHN1,PLXNB2,HNRNPK,KLF2,VAMP3,NLGN3,S100B,UBE2B,SEMA6D,CLU,LRFN5,UCHL1,HPRT1,ATP6V1D,HRAS,WDR35,UGT8,VDR,CUL3,EZR,ISLR2,FLNB,FAT3,MINK1,GAS7,MED1,APP,RHOA,TMEM106B,ARHGAP4,IFRD1,AATK,PPP3CA,FEZ1,CSNK1D,UNC5C,DNM3,SMARCA4,RIMS1,ULK2,ATP2B2,UNC13A,MYO16,SOD1,SEMA3E,SPTBN2,PBLD,SEMA3G,PALMD,COL25A1,LARP4,ITGAV,GDI1,ITGB1,STAT1,SYNGAP1,PTN,CDK5R1,PTPRD,PTPRF,PTPRO,C1QBP,…
GO: Biological Process	GO:0007420	brain development		2.712e-08	0.0001578	4.154e-06	3.841e-05	63	755	ABAT,MAPT,MBP,ACTB,EZH1,PLXNB2,NDRG2,HNRNPD,HNRNPK,FABP7,CKB,SEMA6D,HPRT1,ZBTB18,APLP1,APLP2,MED1,APP,SLC1A2,YWHAE,MBD3,ZIC1,RHOA,SLC6A11,RAB18,AATK,UNC5C,SMARCA4,FAIM2,ATP2B2,NDRG4,MYO16,B4GALT2,ATP5PB,SLC6A17,SPTBN2,ITGB1,PTN,CDK5R1,ALDH1A2,NFIX,PLCB1,SLC17A7,TACC1,KRAS,RAN,CALM2,CALM3,C16orf45,STMN1,ARHGAP35,LDHA,CBLN1,SEZ6L2,TSPAN2,KIF3A,INA,CD9,SUDS3,PAFAH1B1,EML1,CDH2,PCDH9
GO: Biological Process	GO:0051961	negative regulation of nervous system development		3.073e-08	0.0001789	4.587e-06	4.241e-05	35	309	MBP,HNRNPK,NLGN3,SEMA6D,MAP4K4,CNTF,FAT3,CPE,IRX3,MED1,APP,ARF6,RHOA,ARHGAP4,IFRD1,AATK,PPP3CA,DNM3,ULK2,SEMA3E,BRINP1,SEMA3G,GDI1,ITGB1,GFAP,DDX6,SYNGAP1,PTN,CDK5R1,PTPRO,MTMR2,DPYSL3,DTX1,C16orf45,PAFAH1B1
GO: Biological Process	GO:0045665	negative regulation of neuron differentiation		3.431e-08	0.0001997	4.993e-06	4.617e-05	29	227	MBP,NLGN3,SEMA6D,MAP4K4,CNTF,FAT3,IRX3,MED1,APP,ARF6,RHOA,ARHGAP4,IFRD1,AATK,PPP3CA,DNM3,ULK2,SEMA3E,SEMA3G,GDI1,ITGB1,GFAP,DDX6,SYNGAP1,CDK5R1,PTPRO,DPYSL3,DTX1,PAFAH1B1
GO: Biological Process	GO:0022604	regulation of cell morphogenesis		3.835e-08	0.0002233	5.445e-06	5.035e-05	54	609	MAP1B,MAPT,CFL1,MBP,MGLL,CHN1,PLXNB2,HNRNPK,NLGN3,S100B,SEMA6D,EZR,ISLR2,GAS7,RHOA,ARHGAP4,IFRD1,AATK,PPP3CA,CSNK1D,DNM3,RIMS1,ULK2,UNC13A,SEMA3E,PBLD,SEMA3G,PALMD,LARP4,GDI1,STAT1,SYNGAP1,PTN,CDK5R1,PTPRD,PTPRF,PTPRO,C1QBP,KIT,LDLRAD4,NEDD4L,SYNE1,L1CAM,SMURF1,ARHGEF18,SYT2,ARHGAP35,KIF3A,ARPC2,TGFBR3,SH3D19,PAFAH1B1,CDH2,HCK
GO: Biological Process	GO:0031345	negative regulation of cell projection organization		5.198e-08	0.0003026	7.204e-06	6.661e-05	25	179	MBP,PFN2,NLGN3,SEMA6D,MAP4K4,FAT3,ARF6,RHOA,ARHGAP4,IFRD1,AATK,PPP3CA,DNM3,ULK2,SEMA3E,SEMA3G,GDI1,ITGB1,GFAP,SYNGAP1,CDK5R1,PTPRF,PTPRO,DPYSL3,PAFAH1B1
GO: Biological Process	GO:0060284	regulation of cell development		5.797e-08	0.0003374	7.847e-06	7.256e-05	75	985	MAP1B,MAPT,CFL1,MBP,MGLL,CHN1,PLXNB2,HNRNPK,NLGN3,SEMA6D,ATXN1,LRRC7,QKI,MAP4K4,CNTF,VDR,ISLR2,BIN1,FAT3,IRX3,MED1,APP,YWHAG,ARF6,RHOA,TMEM106B,ARHGAP4,SRRT,IFRD1,AATK,PPP3CA,TENM3,FEZ1,DNM3,RIMS1,SNAP25,ULK2,NDRG4,UNC13A,GPRC5B,SEMA3E,PBLD,BRINP1,SEMA3G,GDI1,ITGB1,GFAP,STAT1,DDX6,SYNGAP1,PTN,CDK5R1,PTPRD,PTPRF,PTPRO,C1QBP,KIF3C,KIT,LDLRAD4,DPYSL3,NEDD4L,DTX1,SYNE1,L1CAM,SMURF1,C16orf45,SPAG9,SYT…
GO: Biological Process	GO:0099504	synaptic vesicle cycle		6.722e-08	0.0003913	8.893e-06	8.223e-05	20	121	BTBD9,PFN2,NLGN3,DOC2B,SH3GL2,NAPB,RIMS4,RIMS1,SNAP25,ATP2A2,UNC13A,SPTBN2,STX1A,VAMP2,SYN1,SLC17A7,PCLO,SYT2,SYT7,CDH2
GO: Biological Process	GO:0048667	cell morphogenesis involved in neuron differentiation		8.384e-08	0.000488	1.084e-05	0.0001003	52	590	MAP1B,MAPT,CFL1,MBP,ACTB,MGLL,CHN1,PLXNB2,NLGN3,S100B,SEMA6D,LRFN5,UCHL1,HPRT1,HRAS,EZR,ISLR2,MINK1,APP,RHOA,TMEM106B,ARHGAP4,IFRD1,AATK,PPP3CA,FEZ1,UNC5C,DNM3,ULK2,ATP2B2,SOD1,SEMA3E,SPTBN2,SEMA3G,COL25A1,GDI1,ITGB1,SYNGAP1,CDK5R1,PTPRD,PTPRF,PTPRO,ROBO3,KRAS,NPTX1,SYNE1,L1CAM,STMN1,EFNB1,PAFAH1B1,PARD3,CDH2
GO: Biological Process	GO:0060322	head development		1.092e-07	0.0006359	1.357e-05	0.0001255	64	802	ABAT,MAPT,MBP,ACTB,EZH1,PLXNB2,NDRG2,HNRNPD,HNRNPK,FABP7,CKB,SEMA6D,HPRT1,ZBTB18,APLP1,APLP2,MED1,APP,SLC1A2,YWHAE,MBD3,ZIC1,RHOA,SLC6A11,RAB18,AATK,UNC5C,SMARCA4,FAIM2,ATP2B2,NDRG4,MYO16,B4GALT2,ATP5PB,SLC6A17,SPTBN2,ZFAND5,ITGB1,PTN,CDK5R1,ALDH1A2,NFIX,PLCB1,SLC17A7,TACC1,KRAS,RAN,CALM2,CALM3,C16orf45,STMN1,ARHGAP35,LDHA,CBLN1,SEZ6L2,TSPAN2,KIF3A,INA,CD9,SUDS3,PAFAH1B1,EML1,CDH2,PCDH9
GO: Biological Process	GO:0048193	Golgi vesicle transport		1.096e-07	0.0006378	1.357e-05	0.0001255	36	340	VAPB,VAPA,EPS15,COPZ2,CYTH3,TRAPPC5,COPB2,VAMP3,SERPINA1,CUL3,COPZ1,COPG1,ANXA13,COPG2,RAB6B,ARF3,C16orf70,CSNK1D,EXOC1,STX10,KIF1C,SPTBN2,NAPG,VAMP2,VPS13A,KIF2A,KIF3C,SCFD1,RAB6A,DYNC1H1,KIF3A,ERGIC1,GOLGA7,CD59,DCTN4,DCTN3
GO: Biological Process	GO:0007269	neurotransmitter secretion		1.463e-07	0.0008515	1.709e-05	0.000158	23	163	PFN2,NRXN2,HSPA8,DOC2B,PPFIA3,CASK,NAPB,RIMS4,RIMS1,SNAP25,ATP2A2,UNC13A,SPTBN2,STX1A,PTPRN2,VAMP2,SYN1,SYN2,PCLO,SYT2,GRM4,SYT7,DGKI
GO: Biological Process	GO:0099643	signal release from synapse		1.463e-07	0.0008515	1.709e-05	0.000158	23	163	PFN2,NRXN2,HSPA8,DOC2B,PPFIA3,CASK,NAPB,RIMS4,RIMS1,SNAP25,ATP2A2,UNC13A,SPTBN2,STX1A,PTPRN2,VAMP2,SYN1,SYN2,PCLO,SYT2,GRM4,SYT7,DGKI
GO: Biological Process	GO:0050768	negative regulation of neurogenesis		1.468e-07	0.0008545	1.709e-05	0.000158	32	285	MBP,NLGN3,SEMA6D,MAP4K4,CNTF,FAT3,IRX3,MED1,APP,ARF6,RHOA,ARHGAP4,IFRD1,AATK,PPP3CA,DNM3,ULK2,SEMA3E,BRINP1,SEMA3G,GDI1,ITGB1,GFAP,DDX6,SYNGAP1,PTN,CDK5R1,PTPRO,DPYSL3,DTX1,C16orf45,PAFAH1B1
GO: Biological Process	GO:0010977	negative regulation of neuron projection development		1.728e-07	0.001006	1.973e-05	0.0001824	22	152	MBP,NLGN3,SEMA6D,MAP4K4,FAT3,ARF6,RHOA,ARHGAP4,IFRD1,AATK,PPP3CA,DNM3,ULK2,SEMA3E,SEMA3G,GDI1,GFAP,SYNGAP1,CDK5R1,PTPRO,DPYSL3,PAFAH1B1
GO: Biological Process	GO:0021762	substantia nigra development		2.214e-07	0.001289	2.478e-05	0.0002292	12	47	MBP,ACTB,NDRG2,CKB,YWHAE,RHOA,ATP5PB,CALM2,CALM3,LDHA,INA,SUDS3
GO: Biological Process	GO:0010771	negative regulation of cell morphogenesis involved in differentiation		2.272e-07	0.001323	2.496e-05	0.0002308	20	130	MBP,NLGN3,SEMA6D,RHOA,ARHGAP4,IFRD1,AATK,PPP3CA,DNM3,ULK2,SEMA3E,PBLD,SEMA3G,GDI1,STAT1,SYNGAP1,CDK5R1,PTPRO,LDLRAD4,TGFBR3
GO: Biological Process	GO:0031346	positive regulation of cell projection organization		2.534e-07	0.001475	2.732e-05	0.0002526	37	367	MAP1B,MAPT,PLXNB2,HNRNPK,NLGN3,HRAS,LRRC7,QKI,CNTF,HSP90AA1,ISLR2,RHOA,TMEM106B,TENM3,FEZ1,DNM3,RIMS1,NDRG4,UNC13A,GPRC5B,NCKAP1,EPS8L1,ITGB1,PTN,PTPRD,PTPRF,KIF3C,KIT,GPM6A,DPYSL3,NEDD4L,L1CAM,SMURF1,SYT2,ARHGAP35,ARPC2,PAFAH1B1
GO: Biological Process	GO:0010721	negative regulation of cell development		2.978e-07	0.001734	3.152e-05	0.0002915	36	354	MBP,NLGN3,SEMA6D,MAP4K4,CNTF,FAT3,IRX3,MED1,APP,ARF6,RHOA,ARHGAP4,IFRD1,AATK,PPP3CA,DNM3,ULK2,SEMA3E,PBLD,BRINP1,SEMA3G,GDI1,ITGB1,GFAP,STAT1,DDX6,SYNGAP1,PTN,CDK5R1,PTPRO,LDLRAD4,DPYSL3,DTX1,C16orf45,TGFBR3,PAFAH1B1
GO: Biological Process	GO:0072657	protein localization to membrane		3.249e-07	0.001891	3.378e-05	0.0003123	46	515	RPL21,RPL22,RAB11B,PDPK1,RPS9,RPS17,RPS27A,COLQ,VAMP3,NRXN2,PIK3R2,HSP90AA1,EZR,ANXA13,CPE,YWHAB,YWHAE,YWHAG,ARF6,C16orf70,ATP1B3,LDLRAP1,SRPRA,GDI1,ITGB1,C2CD5,SYNGAP1,PTN,CDK5R1,TSPAN17,VAMP2,PEX19,RABGEF1,SFN,DPP6,SMURF1,CASP8,FIS1,TSPAN5,NDUFA13,GOLGA7,ZDHHC22,ROCK1,PARD3,CDH2,RPL5
GO: Biological Process	GO:0006886	intracellular protein transport		3.432e-07	0.001998	3.505e-05	0.0003241	79	1105	RPL21,CDKN1A,RPL22,SNF8,PDE2A,CLTCL1,COPZ2,CFL1,RPS9,COPB2,RPS17,U2AF2,PEX14,RPS27A,ZDHHC3,BAP1,VAMP3,AP2S1,SNX6,PIK3R2,WDR35,HSPA8,HSP90AA1,HSP90AB1,TOM1L2,IPO7,COPZ1,COPG1,CTDSPL2,ANXA13,COPG2,MED1,YWHAB,YWHAE,YWHAG,ZIC1,CASK,RHOA,C16orf70,PPP3CA,NAPB,IPO13,RIMS1,STX10,NAPG,SRPRA,PBLD,KEAP1,GDI1,ITGB1,C2CD5,CDK5R1,STX1A,BNIP3L,G3BP2,VAMP2,VPS13A,PEX19,RAB7A,AP1M1,RABGEF1,RAB6A,SFN,FBXW11,RAN,SH…
GO: Biological Process	GO:0060341	regulation of cellular localization		3.812e-07	0.002219	3.763e-05	0.000348	95	1416	CDKN1A,SNF8,RAB11B,ABAT,PDE2A,PDE4C,MAP1B,CACNA2D2,MAPT,PDPK1,HMGB1,U2AF2,CHGA,BTBD9,PFN2,CHRNA7,HNRNPK,RYR2,BAP1,VAMP3,NLGN3,SNX6,PIK3R2,MAP4K4,CNTF,HSP90AA1,HSP90AB1,DOC2B,EZR,VSNL1,CTDSPL2,ANXA13,CCT4,MED1,YWHAB,YWHAE,YWHAG,MADD,ZIC1,ARF6,CRY1,RHOA,PPP3CA,NAPB,RIMS4,EXOC1,RIMS1,SNAP25,LZTS2,ATP2A2,NDRG4,UNC13A,LDLRAP1,MYT1,PANX1,PBLD,KEAP1,GDI1,ITGB1,ENY2,C2CD5,PTN,CDK5R1,STX1A,BNIP3L,G3BP2,VA…
GO: Biological Process	GO:0032386	regulation of intracellular transport		3.814e-07	0.00222	3.763e-05	0.000348	55	671	CDKN1A,RAB11B,PDE2A,MAP1B,MAPT,PDPK1,U2AF2,BTBD9,PFN2,RYR2,BAP1,VAMP3,SNX6,PIK3R2,HSP90AA1,HSP90AB1,EZR,CTDSPL2,ANXA13,MED1,YWHAB,YWHAE,YWHAG,ZIC1,RHOA,PPP3CA,NAPB,RIMS4,RIMS1,ATP2A2,NDRG4,UNC13A,PBLD,KEAP1,GDI1,C2CD5,CDK5R1,STX1A,BNIP3L,G3BP2,VAMP2,MTMR2,SYN1,RABGEF1,SCFD1,SFN,FBXW11,SH3TC2,CALM2,CALM3,CASP8,FIS1,HUWE1,KIF3A,SVIP
[truncated: 347 more rows]

## Sheet: GO Cellular Component
Category	ID	Name	Source	p-value	q-value Bonferroni	q-value FDR B&H	q-value FDR B&Y	Hit Count in Query List	Hit Count in Genome	Hit in Query List
[truncated: 153 more rows]

## Sheet: Phenotype
Category	ID	Name	Source	p-value	q-value Bonferroni	q-value FDR B&H	q-value FDR B&Y	Hit Count in Query List	Hit Count in Genome	Hit in Query List
[truncated: 108 more rows]

## Sheet: Domain
Category	ID	Name	Source	p-value	q-value Bonferroni	q-value FDR B&H	q-value FDR B&Y	Hit Count in Query List	Hit Count in Genome	Hit in Query List
[truncated: 44 more rows]

## Sheet: Pathway
Category	ID	Name	Source	p-value	q-value Bonferroni	q-value FDR B&H	q-value FDR B&Y	Hit Count in Query List	Hit Count in Genome	Hit in Query List
[truncated: 371 more rows]

[truncated: 9 more sheets: Pubmed, Interaction, Cytoband, TF Binding site, Gene Family, Co-expression, MiRNA, Disease & Drug, Computational]
