# Supplementary material for: Genome-enabled inference of functional genetic variants in the face, brain and behavior
Source: bioRxiv preprint, doi:10.1101/2020.10.12.336453, version 1 (2020-10-12)
Supplement: Supplementary Table 4 rocksand versus pitcastle [file 336453_file05.xlsx]

## Sheet: Analysis Gene Set
Symbol	Full Name	Aliases	GeneCards URL
ADAM22	ADAM Metallopeptidase Domain 22	MDC2, EIEE61	http://www.genecards.org/cgi-bin/carddisp.pl?gene=ADAM22
ADAMTS16	ADAM Metallopeptidase With Thrombospondin Type 1 Motif 16	ADAMTS16s, KIAA2029, ADAM-TS16, ADAMTS-16	http://www.genecards.org/cgi-bin/carddisp.pl?gene=ADAMTS16
ADAMTSL4	ADAMTS Like 4	ECTOL2, TSRC1, ADAMTSL-4	http://www.genecards.org/cgi-bin/carddisp.pl?gene=ADAMTSL4
ADAR	Adenosine Deaminase, RNA Specific	AGS6, DSH, P136, G1P1, IFI4, ADAR1, DRADA, IFI-4, K88DSRBP, DSRAD	http://www.genecards.org/cgi-bin/carddisp.pl?gene=ADAR
ADCY2	Adenylate Cyclase 2	AC2, HBAC2, KIAA1060	http://www.genecards.org/cgi-bin/carddisp.pl?gene=ADCY2
AGO3	Argonaute 3, RISC Catalytic Component	EIF2C3, Argonaute3, hAgo3	http://www.genecards.org/cgi-bin/carddisp.pl?gene=AGO3
AICDA	Activation Induced Cytidine Deaminase	ARP2, CDA2, HEL-S-284, HIGM2, AID	http://www.genecards.org/cgi-bin/carddisp.pl?gene=AICDA
AIF1	Allograft Inflammatory Factor 1	G1, AIF-1, IRT-1, IRT1, IBA1	http://www.genecards.org/cgi-bin/carddisp.pl?gene=AIF1
AKIRIN1	Akirin 1	STRF2, akirin-1, C1orf108	http://www.genecards.org/cgi-bin/carddisp.pl?gene=AKIRIN1
ALOX15B	Arachidonate 15-Lipoxygenase, Type B	15S-lipoxygenase, 15-LOX-2, 15-LOX-B	http://www.genecards.org/cgi-bin/carddisp.pl?gene=ALOX15B
AMPD1	Adenosine Monophosphate Deaminase 1	AMPD, MAD, MADA, MMDD	http://www.genecards.org/cgi-bin/carddisp.pl?gene=AMPD1
ANGPT4	Angiopoietin 4	ANG3, Angiopoietin-3, ANG-4, ANG4, angiopoietin-4, ANG-3	http://www.genecards.org/cgi-bin/carddisp.pl?gene=ANGPT4
ANKIB1	Ankyrin Repeat And IBR Domain Containing 1	KIAA1386	http://www.genecards.org/cgi-bin/carddisp.pl?gene=ANKIB1
ANKRD28	Ankyrin Repeat Domain 28	PPP1R65, KIAA0379, PITK, PP6-ARS-A	http://www.genecards.org/cgi-bin/carddisp.pl?gene=ANKRD28
ANPEP	Alanyl Aminopeptidase, Membrane	CD13, PEPN, gp150, AP-M, AP-N, APN, hAPN, LAP1, P150	http://www.genecards.org/cgi-bin/carddisp.pl?gene=ANPEP
APCS	Amyloid P Component, Serum	SAP, PTX2, pentraxin-related, pentraxin-2, pentaxin-related, HEL-S-92n	http://www.genecards.org/cgi-bin/carddisp.pl?gene=APCS
APLP1	Amyloid Beta Precursor Like Protein 1	APLP-1, APLP	http://www.genecards.org/cgi-bin/carddisp.pl?gene=APLP1
APOA1	Apolipoprotein A1	apo(a), apo-AI, ApoA-I	http://www.genecards.org/cgi-bin/carddisp.pl?gene=APOA1
APOA4	Apolipoprotein A4	apo-AIV, apoA-IV	http://www.genecards.org/cgi-bin/carddisp.pl?gene=APOA4
APOC1	Apolipoprotein C1	apo-CIB, apoC-IB, Apo-CI, ApoC-I	http://www.genecards.org/cgi-bin/carddisp.pl?gene=APOC1
APOC2	Apolipoprotein C2	APC2, Apo-CII, ApoC-II	http://www.genecards.org/cgi-bin/carddisp.pl?gene=APOC2
APOE	Apolipoprotein E	APO-E, ApoE4, LDLCQ5, LPG, AD2	http://www.genecards.org/cgi-bin/carddisp.pl?gene=APOE
AQP10	Aquaporin 10	Aquaglyceroporin-10, aquaporin-10, AQPA_HUMAN, AQP-10	http://www.genecards.org/cgi-bin/carddisp.pl?gene=AQP10
ARHGEF1	Rho Guanine Nucleotide Exchange Factor 1	GEF1, LBCL2, LSC, P115-RHOGEF, SUB1.5, p115RhoGEF	http://www.genecards.org/cgi-bin/carddisp.pl?gene=ARHGEF1
ARHGEF19	Rho Guanine Nucleotide Exchange Factor 19	WGEF, ephexin-2, ephexin2	http://www.genecards.org/cgi-bin/carddisp.pl?gene=ARHGEF19
ARHGEF5	Rho Guanine Nucleotide Exchange Factor 5	ephexin3, GEF5, P60, TIM1, ephexin-3, TIM	http://www.genecards.org/cgi-bin/carddisp.pl?gene=ARHGEF5
ARID1A	AT-Rich Interaction Domain 1A	MRD14, ELD, CSS2, BM029, C1orf4, SMARCF1, BAF250A, B120, BAF250, OSA1, hELD, hOSA1, P270	http://www.genecards.org/cgi-bin/carddisp.pl?gene=ARID1A
ARNT	Aryl Hydrocarbon Receptor Nuclear Translocator	HIF-1beta, HIF1B, HIF1BETA, TANGO, BHLHE2, HIF-1-beta, HIF1-beta	http://www.genecards.org/cgi-bin/carddisp.pl?gene=ARNT
ASXL1	ASXL Transcriptional Regulator 1	BOPS, MDS, KIAA0978	http://www.genecards.org/cgi-bin/carddisp.pl?gene=ASXL1
ATG12	Autophagy Related 12	FBR93, HAPG12, APG12L, APG12-like, APG12	http://www.genecards.org/cgi-bin/carddisp.pl?gene=ATG12
ATP10A	ATPase Phospholipid Transporting 10A (Putative)	ATPVC, KIAA0566, ATPVA, ATP10C	http://www.genecards.org/cgi-bin/carddisp.pl?gene=ATP10A
ATP8B2	ATPase Phospholipid Transporting 8B2	KIAA1137, ATPID	http://www.genecards.org/cgi-bin/carddisp.pl?gene=ATP8B2
ATXN1	Ataxin 1	D6S504E, ataxin-1, SCA1, ATX1	http://www.genecards.org/cgi-bin/carddisp.pl?gene=ATXN1
AZI2	5-Azacytidine Induced 2	NAP1, TBKBP2, AZ2, TILP	http://www.genecards.org/cgi-bin/carddisp.pl?gene=AZI2
BCAM	Basal Cell Adhesion Molecule (Lutheran Blood Group)	LU, CD239, AU, MSK19	http://www.genecards.org/cgi-bin/carddisp.pl?gene=BCAM
BNC1	Basonuclin 1	BNC, HsT19447, BSN1, basonuclin	http://www.genecards.org/cgi-bin/carddisp.pl?gene=BNC1
BTG4	BTG Anti-Proliferation Factor 4	PC3B, APRO3	http://www.genecards.org/cgi-bin/carddisp.pl?gene=BTG4
C1R	Complement C1r	EDSPD1	http://www.genecards.org/cgi-bin/carddisp.pl?gene=C1R
C1orf43	Chromosome 1 Open Reading Frame 43	HSPC012, NICE-3, NICE3, NS5ATP4, S863-3	http://www.genecards.org/cgi-bin/carddisp.pl?gene=C1orf43
C4A	Complement C4A (Rodgers Blood Group)	C4A4, C4A3, C4A6, C4AD, C4A2, C4, CPAMD2, C4S, RG, CO4	http://www.genecards.org/cgi-bin/carddisp.pl?gene=C4A
CA2	Carbonic Anhydrase 2	CA-II, CAC, CAII, Car2, HEL-S-282, HEL-76	http://www.genecards.org/cgi-bin/carddisp.pl?gene=CA2
CACNA1A	Calcium Voltage-Gated Channel Subunit Alpha1 A	APCA, CAV2.1, EA2, EIEE42, FHM, HPCA, MHP, MHP1, CACH4, CACN3, BI, SCA6, CACNL1A4	http://www.genecards.org/cgi-bin/carddisp.pl?gene=CACNA1A
CACNA1B	Calcium Voltage-Gated Channel Subunit Alpha1 B	CACNN, Cav2.2, DYT23, CACNL1A5, CACH5, BIII	http://www.genecards.org/cgi-bin/carddisp.pl?gene=CACNA1B
CACNA2D4	Calcium Voltage-Gated Channel Auxiliary Subunit Alpha2delta 4	RCD4	http://www.genecards.org/cgi-bin/carddisp.pl?gene=CACNA2D4
CACNG6	Calcium Voltage-Gated Channel Auxiliary Subunit Gamma 6		http://www.genecards.org/cgi-bin/carddisp.pl?gene=CACNG6
CACNG7	Calcium Voltage-Gated Channel Auxiliary Subunit Gamma 7		http://www.genecards.org/cgi-bin/carddisp.pl?gene=CACNG7
CACNG8	Calcium Voltage-Gated Channel Auxiliary Subunit Gamma 8	CACNG6	http://www.genecards.org/cgi-bin/carddisp.pl?gene=CACNG8
CADM4	Cell Adhesion Molecule 4	Necl-4, synCAM4, IGSF4C, NECL4, TSLL2	http://www.genecards.org/cgi-bin/carddisp.pl?gene=CADM4
CBX3	Chromobox 3	HP1Hs-gamma, HECH, HP1-GAMMA	http://www.genecards.org/cgi-bin/carddisp.pl?gene=CBX3
CC2D2A	Coiled-Coil And C2 Domain Containing 2A	JBTS9, KIAA1345, MKS6	http://www.genecards.org/cgi-bin/carddisp.pl?gene=CC2D2A
CCDC12	Coiled-Coil Domain Containing 12		http://www.genecards.org/cgi-bin/carddisp.pl?gene=CCDC12
CCNE2	Cyclin E2	CYCE2	http://www.genecards.org/cgi-bin/carddisp.pl?gene=CCNE2
CCR8	C-C Motif Chemokine Receptor 8	CDw198, CY6, CMKBR8, CMKBRL2, CKR-L1, GPR-CY6, CC-CKR-8, CCR-8, CKRL1, GPRCY6, TER1	http://www.genecards.org/cgi-bin/carddisp.pl?gene=CCR8
CD27	CD27 Molecule	S152, Tp55, TNFRSF7, T14	http://www.genecards.org/cgi-bin/carddisp.pl?gene=CD27
CD37	CD37 Molecule	tspan-26, Tetraspanin-26, TSPAN26, GP52-40	http://www.genecards.org/cgi-bin/carddisp.pl?gene=CD37
CD4	CD4 Molecule	CD4mut	http://www.genecards.org/cgi-bin/carddisp.pl?gene=CD4
CD79A	CD79a Molecule	MB-1, ig-alpha, IGA, MB1	http://www.genecards.org/cgi-bin/carddisp.pl?gene=CD79A
CD86	CD86 Molecule	B7-2, B7.2, LAB72, CD28LG2, B70, BU63, FUN-1	http://www.genecards.org/cgi-bin/carddisp.pl?gene=CD86
CDC42BPG	CDC42 Binding Protein Kinase Gamma	HSMDPKIN, KAPPA-200, MRCKgamma, DMPK2, MRCKG	http://www.genecards.org/cgi-bin/carddisp.pl?gene=CDC42BPG
CDC42EP5	CDC42 Effector Protein 5	Borg3, CEP5	http://www.genecards.org/cgi-bin/carddisp.pl?gene=CDC42EP5
CDH17	Cadherin 17	CDH16, HPT-1, HPT1, cadherin-16, cadherin-17, LI-cadherin	http://www.genecards.org/cgi-bin/carddisp.pl?gene=CDH17
CDKAL1	CDK5 Regulatory Subunit Associated Protein 1 Like 1		http://www.genecards.org/cgi-bin/carddisp.pl?gene=CDKAL1
CEACAM21	Carcinoembryonic Antigen Related Cell Adhesion Molecule 21	R29124_1, CEACAM3	http://www.genecards.org/cgi-bin/carddisp.pl?gene=CEACAM21
CELF3	CUGBP Elav-Like Family Member 3	TNRC4, CELF-3, BRUNOL1, CAGH4, ERDA4, ETR-1	http://www.genecards.org/cgi-bin/carddisp.pl?gene=CELF3
CEP72	Centrosomal Protein 72	Cep72, KIAA1519	http://www.genecards.org/cgi-bin/carddisp.pl?gene=CEP72
CERS2	Ceramide Synthase 2	LASS2, CerS2, SP260, TMSG1, L3	http://www.genecards.org/cgi-bin/carddisp.pl?gene=CERS2
CGN	Cingulin	cingulin, KIAA1319	http://www.genecards.org/cgi-bin/carddisp.pl?gene=CGN
CHCHD6	Coiled-Coil-Helix-Coiled-Coil-Helix Domain Containing 6	MIC25, PPP1R23, CHCM1	http://www.genecards.org/cgi-bin/carddisp.pl?gene=CHCHD6
CHD4	Chromodomain Helicase DNA Binding Protein 4	Mi-2b, Mi2-BETA, SIHIWES, CHD-4	http://www.genecards.org/cgi-bin/carddisp.pl?gene=CHD4
CHN2	Chimerin 2	Beta-chimerin, ARHGAP3, BCH, beta3-chimaerin, beta-chimaerin, CHN2-3, RHOGAP3	http://www.genecards.org/cgi-bin/carddisp.pl?gene=CHN2
CHRNA7	Cholinergic Receptor Nicotinic Alpha 7 Subunit	CHRNA7-2, NACHRA7	http://www.genecards.org/cgi-bin/carddisp.pl?gene=CHRNA7
CHRNB2	Cholinergic Receptor Nicotinic Beta 2 Subunit	EFNL3, nAChRB2	http://www.genecards.org/cgi-bin/carddisp.pl?gene=CHRNB2
CIART	Circadian Associated Repressor Of Transcription	C1orf51, Chrono, GM129	http://www.genecards.org/cgi-bin/carddisp.pl?gene=CIART
CIC	Capicua Transcriptional Repressor	KIAA0306, MRD45	http://www.genecards.org/cgi-bin/carddisp.pl?gene=CIC
CITED4	Cbp/P300 Interacting Transactivator With Glu/Asp Rich Carboxy-Terminal Domain 4	MRG2, MRG-2	http://www.genecards.org/cgi-bin/carddisp.pl?gene=CITED4
CKAP2L	Cytoskeleton Associated Protein 2 Like	Radmis	http://www.genecards.org/cgi-bin/carddisp.pl?gene=CKAP2L
CLCN1	Chloride Voltage-Gated Channel 1	clC-1, CLC1	http://www.genecards.org/cgi-bin/carddisp.pl?gene=CLCN1
CLEC3B	C-Type Lectin Domain Family 3 Member B	tetranectin, TNA, TN	http://www.genecards.org/cgi-bin/carddisp.pl?gene=CLEC3B
CLEC4G	C-Type Lectin Domain Family 4 Member G	DTTR431, LP2698, UNQ431, LSECtin	http://www.genecards.org/cgi-bin/carddisp.pl?gene=CLEC4G
CLK2	CDC Like Kinase 2		http://www.genecards.org/cgi-bin/carddisp.pl?gene=CLK2
CLSTN3	Calsyntenin 3	CDHR14, CSTN3, alc-beta, alcbeta, calsyntenin-3, Alcadein-beta, CS3, KIAA0726	http://www.genecards.org/cgi-bin/carddisp.pl?gene=CLSTN3
CMC1	C-X9-C Motif Containing 1	Cmc1p, C3orf68	http://www.genecards.org/cgi-bin/carddisp.pl?gene=CMC1
CMKLR1	Chemerin Chemokine-Like Receptor 1	CHEMERINR, ChemR23, RVER1, DEZ	http://www.genecards.org/cgi-bin/carddisp.pl?gene=CMKLR1
CNR2	Cannabinoid Receptor 2	CB2A, CB2B, hCB2, CB-2, CB2, CX5	http://www.genecards.org/cgi-bin/carddisp.pl?gene=CNR2
CNTN1	Contactin 1	F3, GP135, MYPCN, contactin-1	http://www.genecards.org/cgi-bin/carddisp.pl?gene=CNTN1
CNTNAP5	Contactin Associated Protein Like 5	caspr5	http://www.genecards.org/cgi-bin/carddisp.pl?gene=CNTNAP5
COBL	Cordon-Bleu WH2 Repeat Protein	KIAA0633	http://www.genecards.org/cgi-bin/carddisp.pl?gene=COBL
COL21A1	Collagen Type XXI Alpha 1 Chain	FP633, COL1AL, COLA1L	http://www.genecards.org/cgi-bin/carddisp.pl?gene=COL21A1
COL4A2	Collagen Type IV Alpha 2 Chain	ICH, POREN2, canstatin	http://www.genecards.org/cgi-bin/carddisp.pl?gene=COL4A2
COLQ	Collagen Like Tail Subunit Of Asymmetric Acetylcholinesterase	CMS5, EAD	http://www.genecards.org/cgi-bin/carddisp.pl?gene=COLQ
COPS7A	COP9 Signalosome Subunit 7A	CSN7, DERP10, CSN7A, SGN7a	http://www.genecards.org/cgi-bin/carddisp.pl?gene=COPS7A
COX6B2	Cytochrome C Oxidase Subunit 6B2	COXVIB2, CT59	http://www.genecards.org/cgi-bin/carddisp.pl?gene=COX6B2
CPLX3	Complexin 3	CPX-III, CPXIII, Nbla11589, complexin-3	http://www.genecards.org/cgi-bin/carddisp.pl?gene=CPLX3
CPLX4	Complexin 4	CPX-IV, CPXIV, complexin-4	http://www.genecards.org/cgi-bin/carddisp.pl?gene=CPLX4
CRABP2	Cellular Retinoic Acid Binding Protein 2	CRABP-II, RBP6	http://www.genecards.org/cgi-bin/carddisp.pl?gene=CRABP2
CREB5	CAMP Responsive Element Binding Protein 5	CRE-BPA, CREB-5, CREBPA	http://www.genecards.org/cgi-bin/carddisp.pl?gene=CREB5
CROT	Carnitine O-Octanoyltransferase	COT	http://www.genecards.org/cgi-bin/carddisp.pl?gene=CROT
CRYBA2	Crystallin Beta A2	CTRCT42	http://www.genecards.org/cgi-bin/carddisp.pl?gene=CRYBA2
CSF3R	Colony Stimulating Factor 3 Receptor	GCSFR, G-CSF-R, SCN7, CD114	http://www.genecards.org/cgi-bin/carddisp.pl?gene=CSF3R
CSNK2A1	Casein Kinase 2 Alpha 1	CKII, Cka1, Cka2, OCNDS, CK2A1	http://www.genecards.org/cgi-bin/carddisp.pl?gene=CSNK2A1
CSNK2B	Casein Kinase 2 Beta	CK2B, CSK2B, CSNK2B-LY6G5B-1072, CSNK2B-LY6G5B-1103, CSNK2B-LY6G5B-532, CSNK2B-LY6G5B-560, CSNK2B-LY6G5B-562, Ckb1, Ckb2, phosvitin, CK2N, G5A	http://www.genecards.org/cgi-bin/carddisp.pl?gene=CSNK2B
CTHRC1	Collagen Triple Helix Repeat Containing 1		http://www.genecards.org/cgi-bin/carddisp.pl?gene=CTHRC1
CTNNB1	Catenin Beta 1	EVR7, MRD19, armadillo, CTNNB, Beta-catenin	http://www.genecards.org/cgi-bin/carddisp.pl?gene=CTNNB1
CTPS1	CTP Synthase 1	GATD5, IMD24, CTPS	http://www.genecards.org/cgi-bin/carddisp.pl?gene=CTPS1
CTRL	Chymotrypsin Like	CTRL1, chymotrypsin-like	http://www.genecards.org/cgi-bin/carddisp.pl?gene=CTRL
CX3CR1	C-X3-C Motif Chemokine Receptor 1	CCRL1, CMKDR1, GPRV28, CMKBRL1, GPR13, CMK-BRL1, CMK-BRL-1, V28	http://www.genecards.org/cgi-bin/carddisp.pl?gene=CX3CR1
CYLD	CYLD Lysine 63 Deubiquitinase	BRSS, CDMT, CYLDI, EAC, MFT, MFT1, SBS, TEM, USPL2, CYLD1, KIAA0849	http://www.genecards.org/cgi-bin/carddisp.pl?gene=CYLD
CYP11B2	Cytochrome P450 Family 11 Subfamily B Member 2	CPN2, CYP11BL, ALDOS, CYPXIB2, P-450C18, P450C18, P450aldo, CYP11B	http://www.genecards.org/cgi-bin/carddisp.pl?gene=CYP11B2
CYP21A2	Cytochrome P450 Family 21 Subfamily A Member 2	CA21H, CAH1, CPS1, P450c21B, CYP21, CYP21B, 21-OHase	http://www.genecards.org/cgi-bin/carddisp.pl?gene=CYP21A2
CYP4A11	Cytochrome P450 Family 4 Subfamily A Member 11	CP4Y, P450HL-omega, CYP4A2, CYP4AII, CYPIVA11	http://www.genecards.org/cgi-bin/carddisp.pl?gene=CYP4A11
CYTH2	Cytohesin 2	CTC-273B12.8, CTS18, CTS18.1, SEC7L, Sec7p-L, Sec7p-like, cytohesin-2, PSCD2, PSCD2L, ARNO	http://www.genecards.org/cgi-bin/carddisp.pl?gene=CYTH2
DAP3	Death Associated Protein 3	MRP-S29, DAP-3, bMRP-10, MRPS29, S29mt	http://www.genecards.org/cgi-bin/carddisp.pl?gene=DAP3
DBF4	DBF4 Zinc Finger	CHIF, ZDBF1, DBF4A, ASK	http://www.genecards.org/cgi-bin/carddisp.pl?gene=DBF4
DCAF13	DDB1 And CUL4 Associated Factor 13	HSPC064, GM83, WDSOF1, Sof1	http://www.genecards.org/cgi-bin/carddisp.pl?gene=DCAF13
DCBLD2	Discoidin, CUB And LCCL Domain Containing 2	1700055P21Rik, CLCP1, ESDN	http://www.genecards.org/cgi-bin/carddisp.pl?gene=DCBLD2
DCSTAMP	Dendrocyte Expressed Seven Transmembrane Protein	TM7SF4, DC-STAMP, FIND, hDC-STAMP	http://www.genecards.org/cgi-bin/carddisp.pl?gene=DCSTAMP
DDR1	Discoidin Domain Receptor Tyrosine Kinase 1	CD167, PTK3, DDR, MCK10, CAK, EDDR1, NEP, NTRK4, PTK3A, HGK2, RTK6, TRKE, MCK-10	http://www.genecards.org/cgi-bin/carddisp.pl?gene=DDR1
DDX6	DEAD-Box Helicase 6	P54, HLR2, RCK	http://www.genecards.org/cgi-bin/carddisp.pl?gene=DDX6
DENND2C	DENN Domain Containing 2C	RP5-1156J9.1, dJ1156J9.1	http://www.genecards.org/cgi-bin/carddisp.pl?gene=DENND2C
DEPTOR	DEP Domain Containing MTOR Interacting Protein	DEPDC6, DEP.6	http://www.genecards.org/cgi-bin/carddisp.pl?gene=DEPTOR
DERL1	Derlin 1	DER-1, derlin-1, DER1, DERtrin-1	http://www.genecards.org/cgi-bin/carddisp.pl?gene=DERL1
DGAT1	Diacylglycerol O-Acyltransferase 1	DGAT, AGRP1, ARAT, ARGP1, DIAR7	http://www.genecards.org/cgi-bin/carddisp.pl?gene=DGAT1
DHDDS	Dehydrodolichyl Diphosphate Synthase Subunit	CIT, HDS, Cis-IPTase, Cis-isoprenyltransferase, DEDSM, DS, RP59, CPT	http://www.genecards.org/cgi-bin/carddisp.pl?gene=DHDDS
DNALI1	Dynein Axonemal Light Intermediate Chain 1	P28, dJ423B22.5, hp28	http://www.genecards.org/cgi-bin/carddisp.pl?gene=DNALI1
DNASE1L1	Deoxyribonuclease 1 Like 1	DNASEX, G4.8, DNL1L, DNAS1L1, XIB	http://www.genecards.org/cgi-bin/carddisp.pl?gene=DNASE1L1
DOPEY1	Dopey Family Member 1	KIAA1117, DOP1, dJ202D23.2	http://www.genecards.org/cgi-bin/carddisp.pl?gene=DOPEY1
DPYS	Dihydropyrimidinase	hydantoinase, dihydropyrimidinase, DHP, DHPase	http://www.genecards.org/cgi-bin/carddisp.pl?gene=DPYS
DRD2	Dopamine Receptor D2	D2R, D2DR	http://www.genecards.org/cgi-bin/carddisp.pl?gene=DRD2
DSCC1	DNA Replication And Sister Chromatid Cohesion 1	DCC1	http://www.genecards.org/cgi-bin/carddisp.pl?gene=DSCC1
EBAG9	Estrogen Receptor Binding Site Associated, Antigen, 9	RCAS1, EB9, PDAF	http://www.genecards.org/cgi-bin/carddisp.pl?gene=EBAG9
ECM1	Extracellular Matrix Protein 1	URBWD	http://www.genecards.org/cgi-bin/carddisp.pl?gene=ECM1
EIF3E	Eukaryotic Translation Initiation Factor 3 Subunit E	EIF3-P48, eIF3-p46, EIF3S6, INT6, eIF3e	http://www.genecards.org/cgi-bin/carddisp.pl?gene=EIF3E
EIF3H	Eukaryotic Translation Initiation Factor 3 Subunit H	eIF3-gamma, eIF3-p40, EIF3S3, eIF3h, eIF-3-gamma	http://www.genecards.org/cgi-bin/carddisp.pl?gene=EIF3H
EMC2	ER Membrane Protein Complex Subunit 2	TTC35, KIAA0103	http://www.genecards.org/cgi-bin/carddisp.pl?gene=EMC2
EMG1	EMG1, N1-Specific Pseudouridine Methyltransferase	NEP1, Grcc2f, C2F	http://www.genecards.org/cgi-bin/carddisp.pl?gene=EMG1
ENDOU	Endonuclease, Poly(U) Specific	P11, PRSS26, PP11	http://www.genecards.org/cgi-bin/carddisp.pl?gene=ENDOU
ENTPD3	Ectonucleoside Triphosphate Diphosphohydrolase 3	NTPDase-3, CD39L3, HB6	http://www.genecards.org/cgi-bin/carddisp.pl?gene=ENTPD3
ENY2	ENY2, Transcription And Export Complex 2 Subunit	DC6, Sus1, e(y)2	http://www.genecards.org/cgi-bin/carddisp.pl?gene=ENY2
EPB41	Erythrocyte Membrane Protein Band 4.1	EL1, HE, E41P, 4.1R, EPB4.1, P4.1	http://www.genecards.org/cgi-bin/carddisp.pl?gene=EPB41
EPB41L4B	Erythrocyte Membrane Protein Band 4.1 Like 4B	EHM2, CG1, LULU2	http://www.genecards.org/cgi-bin/carddisp.pl?gene=EPB41L4B
EPHB2	EPH Receptor B2	EPHT3, ERK, DRT, EPTH3, HEK5, TYRO5, CAPB, PCBC, EphB2, EK5	http://www.genecards.org/cgi-bin/carddisp.pl?gene=EPHB2
ESRP1	Epithelial Splicing Regulatory Protein 1	RMB35A, RBM35A	http://www.genecards.org/cgi-bin/carddisp.pl?gene=ESRP1
EVA1B	Eva-1 Homolog B	C1orf78, FAM176B	http://www.genecards.org/cgi-bin/carddisp.pl?gene=EVA1B
FABP5	Fatty Acid Binding Protein 5	E-FABP, PA-FABP, EFABP, KFABP, PAFABP	http://www.genecards.org/cgi-bin/carddisp.pl?gene=FABP5
FAM110D	Family With Sequence Similarity 110 Member D	GRRP1	http://www.genecards.org/cgi-bin/carddisp.pl?gene=FAM110D
FAM131B	Family With Sequence Similarity 131 Member B	KIAA0773	http://www.genecards.org/cgi-bin/carddisp.pl?gene=FAM131B
FAM160B2	Family With Sequence Similarity 160 Member B2	RAI16	http://www.genecards.org/cgi-bin/carddisp.pl?gene=FAM160B2
FAM171A1	Family With Sequence Similarity 171 Member A1	Astroprincin, C10orf38	http://www.genecards.org/cgi-bin/carddisp.pl?gene=FAM171A1
FAM8A1	Family With Sequence Similarity 8 Member A1	AHCP	http://www.genecards.org/cgi-bin/carddisp.pl?gene=FAM8A1
FAXC	Failed Axon Connections Homolog	dJ273F20, C6orf168	http://www.genecards.org/cgi-bin/carddisp.pl?gene=FAXC
FBXL4	F-Box And Leucine Rich Repeat Protein 4	MTDPS13, FBL4, FBL5	http://www.genecards.org/cgi-bin/carddisp.pl?gene=FBXL4
FBXL5	F-Box And Leucine Rich Repeat Protein 5	FBL4, FBL5, FLR1	http://www.genecards.org/cgi-bin/carddisp.pl?gene=FBXL5
FDPS	Farnesyl Diphosphate Synthase	Geranyltranstransferase, Dimethylallyltranstransferase, KIAA1293, FPS, POROK9, FPPS	http://www.genecards.org/cgi-bin/carddisp.pl?gene=FDPS
FEZ2	Fasciculation And Elongation Protein Zeta 2	HUM3CL, Zygin-2	http://www.genecards.org/cgi-bin/carddisp.pl?gene=FEZ2
FGFR1OP	FGFR1 Oncogene Partner	FOP	http://www.genecards.org/cgi-bin/carddisp.pl?gene=FGFR1OP
FHL3	Four And A Half LIM Domains 3	FHL-3, SLIM2, SLIM-2	http://www.genecards.org/cgi-bin/carddisp.pl?gene=FHL3
FKBP14	FK506 Binding Protein 14	IPBP12, EDSKMH, EDSKSCL2, FKBP-22, FKBP22, Rotamase, FKBP-14	http://www.genecards.org/cgi-bin/carddisp.pl?gene=FKBP14
FLAD1	Flavin Adenine Dinucleotide Synthetase 1	FAD-synthetase, FAD1, LSMFLAD, PP591, FADS	http://www.genecards.org/cgi-bin/carddisp.pl?gene=FLAD1
FLCN	Folliculin	BHD, folliculin, FLCL	http://www.genecards.org/cgi-bin/carddisp.pl?gene=FLCN
FPR1	Formyl Peptide Receptor 1	FPR, FMLP	http://www.genecards.org/cgi-bin/carddisp.pl?gene=FPR1
FXYD1	FXYD Domain Containing Ion Transport Regulator 1	phospholemman, PLM	http://www.genecards.org/cgi-bin/carddisp.pl?gene=FXYD1
FXYD3	FXYD Domain Containing Ion Transport Regulator 3	PLML, MAT8, Phospholemman-like	http://www.genecards.org/cgi-bin/carddisp.pl?gene=FXYD3
FXYD5	FXYD Domain Containing Ion Transport Regulator 5	HSPC113, PRO6241, OIT2, RIC, Dysadherin, DYSAD, IWU1, KCT1	http://www.genecards.org/cgi-bin/carddisp.pl?gene=FXYD5
FXYD6	FXYD Domain Containing Ion Transport Regulator 6	phosphohippolin	http://www.genecards.org/cgi-bin/carddisp.pl?gene=FXYD6
FZD6	Frizzled Class Receptor 6	NDNC10, HFZ6, FZ-6, FZ6, frizzled-6	http://www.genecards.org/cgi-bin/carddisp.pl?gene=FZD6
FZD7	Frizzled Class Receptor 7	hFz7, FzE3, Fz-7, frizzled-7	http://www.genecards.org/cgi-bin/carddisp.pl?gene=FZD7
GABARAP	GABA Type A Receptor-Associated Protein	FLC3B, MM46, GABARAP-a, ATG8A	http://www.genecards.org/cgi-bin/carddisp.pl?gene=GABARAP
GABARAPL1	GABA Type A Receptor Associated Protein Like 1	GEC-1, GEC1, ATG8, GABARAPL1-a, ATG8B, ATG8L, APG8L, APG8-LIKE	http://www.genecards.org/cgi-bin/carddisp.pl?gene=GABARAPL1
GALNT1	Polypeptide N-Acetylgalactosaminyltransferase 1	GalNAc-T1	http://www.genecards.org/cgi-bin/carddisp.pl?gene=GALNT1
GAN	Gigaxonin	gigaxonin, GAN1, KLHL16	http://www.genecards.org/cgi-bin/carddisp.pl?gene=GAN
GAPDH	Glyceraldehyde-3-Phosphate Dehydrogenase	GAPD, G3PD, HEL-S-162eP	http://www.genecards.org/cgi-bin/carddisp.pl?gene=GAPDH
GAPDHS	Glyceraldehyde-3-Phosphate Dehydrogenase, Spermatogenic	HEL-S-278, HSD-35, GAPDH2, GAPD2, GAPDH-2, GAPDS	http://www.genecards.org/cgi-bin/carddisp.pl?gene=GAPDHS
GBA	Glucosylceramidase Beta	GCB, GBA1, alglucerase, beta-GC, beta-glucocerebrosidase, imiglucerase, glucosylceramidase, GLUC, GC	http://www.genecards.org/cgi-bin/carddisp.pl?gene=GBA
GDF6	Growth Differentiation Factor 6	SGM1, SYNS4, KFM, KFSL, KFS1, KFS, CDMP2, GDF16, GDF-6, BMP-13, BMP13	http://www.genecards.org/cgi-bin/carddisp.pl?gene=GDF6
GEM	GTP Binding Protein Overexpressed In Skeletal Muscle	KIR	http://www.genecards.org/cgi-bin/carddisp.pl?gene=GEM
GLIPR2	GLI Pathogenesis Related 2	C9orf19, GAPR-1, GAPR1	http://www.genecards.org/cgi-bin/carddisp.pl?gene=GLIPR2
GLT1D1	Glycosyltransferase 1 Domain Containing 1		http://www.genecards.org/cgi-bin/carddisp.pl?gene=GLT1D1
GMEB1	Glucocorticoid Modulatory Element Binding Protein 1	GMEB-1, PIF96, P96PIF	http://www.genecards.org/cgi-bin/carddisp.pl?gene=GMEB1
GNB3	G Protein Subunit Beta 3	CSNB1H	http://www.genecards.org/cgi-bin/carddisp.pl?gene=GNB3
GNB4	G Protein Subunit Beta 4	CMTD1F	http://www.genecards.org/cgi-bin/carddisp.pl?gene=GNB4
GNL1	G Protein Nucleolar 1 (Putative)	HSR1	http://www.genecards.org/cgi-bin/carddisp.pl?gene=GNL1
GPR1	G Protein-Coupled Receptor 1		http://www.genecards.org/cgi-bin/carddisp.pl?gene=GPR1
GRB10	Growth Factor Receptor Bound Protein 10	IRBP, MEG1, Grb-10, GRB-IR, RSS, KIAA0207, GRBIR	http://www.genecards.org/cgi-bin/carddisp.pl?gene=GRB10
GRIK2	Glutamate Ionotropic Receptor Kainate Type Subunit 2	GluR-6, GLUR6, EAA4, GluK2, GLR6, GLUK6, MRT6, bA487F5.1	http://www.genecards.org/cgi-bin/carddisp.pl?gene=GRIK2
GRIK3	Glutamate Ionotropic Receptor Kainate Type Subunit 3	GluR-7, GluR7, EAA5, GluK3, GluR7a, GLR7	http://www.genecards.org/cgi-bin/carddisp.pl?gene=GRIK3
GRWD1	Glutamate Rich WD Repeat Containing 1	CDW4, RRB1, KIAA1942, GRWD, WDR28	http://www.genecards.org/cgi-bin/carddisp.pl?gene=GRWD1
GTPBP10	GTP Binding Protein 10	OBGH2, UG0751c10	http://www.genecards.org/cgi-bin/carddisp.pl?gene=GTPBP10
GZMK	Granzyme K	TRYP2, NK-tryptase-2, NK-Tryp-2, Fragmentin-3, Granzyme-3	http://www.genecards.org/cgi-bin/carddisp.pl?gene=GZMK
HACL1	2-Hydroxyacyl-CoA Lyase 1	HPCL, 1600020H07Rik, 2-HPCL, HPCL2, PHYH2	http://www.genecards.org/cgi-bin/carddisp.pl?gene=HACL1
HAS2	Hyaluronan Synthase 2		http://www.genecards.org/cgi-bin/carddisp.pl?gene=HAS2
HCST	Hematopoietic Cell Signal Transducer	PIK3AP, DAP10, KAP10	http://www.genecards.org/cgi-bin/carddisp.pl?gene=HCST
HDAC9	Histone Deacetylase 9	HDAC, HDAC9B, HDAC9FL, HD7, HD7b, HD9, HDAC7, HDAC7B, HDRP, MITR, KIAA0744	http://www.genecards.org/cgi-bin/carddisp.pl?gene=HDAC9
HEY1	Hes Related Family BHLH Transcription Factor With YRPW Motif 1	HRT1, bHLHb31, CHF2, HERP2, HESR1, HRT-1, hHRT1, OAF1, CHF-2, HESR-1	http://www.genecards.org/cgi-bin/carddisp.pl?gene=HEY1
HIBADH	3-Hydroxyisobutyrate Dehydrogenase	NS5ATP1	http://www.genecards.org/cgi-bin/carddisp.pl?gene=HIBADH
HIVEP3	Human Immunodeficiency Virus Type I Enhancer Binding Protein 3	SHN3, Schnurri-3, ZNF40C, KIAA1555, KBP-1, KBP1, KRC, ZAS3	http://www.genecards.org/cgi-bin/carddisp.pl?gene=HIVEP3
HS3ST6	Heparan Sulfate-Glucosamine 3-Sulfotransferase 6	HS3ST5, h3-OST-6, 3-OST-6	http://www.genecards.org/cgi-bin/carddisp.pl?gene=HS3ST6
HSPA2	Heat Shock Protein Family A (Hsp70) Member 2	HSP70-3, HSP70-2	http://www.genecards.org/cgi-bin/carddisp.pl?gene=HSPA2
HSPB6	Heat Shock Protein Family B (Small) Member 6	HEL55, Hsp20, PPP1R91, HspB6	http://www.genecards.org/cgi-bin/carddisp.pl?gene=HSPB6
HSPB8	Heat Shock Protein Family B (Small) Member 8	CMT2L, DHMN2, H11, HMN2, HMN2A, CRYAC, E2IG1, HSP22, HspB8	http://www.genecards.org/cgi-bin/carddisp.pl?gene=HSPB8
HSPB9	Heat Shock Protein Family B (Small) Member 9	HspB9, CT51	http://www.genecards.org/cgi-bin/carddisp.pl?gene=HSPB9
IBTK	Inhibitor Of Bruton Tyrosine Kinase	BTBD26, BTKI, KIAA1417, IBtk	http://www.genecards.org/cgi-bin/carddisp.pl?gene=IBTK
ICE1	Interactor Of Little Elongation Complex ELL Subunit 1	KIAA0947	http://www.genecards.org/cgi-bin/carddisp.pl?gene=ICE1
IFFO1	Intermediate Filament Family Orphan 1	IFFO, HOM-TES-103	http://www.genecards.org/cgi-bin/carddisp.pl?gene=IFFO1
IFITM1	Interferon Induced Transmembrane Protein 1	IFI17, LEU13, 9-27, CD225, DSPA2a	http://www.genecards.org/cgi-bin/carddisp.pl?gene=IFITM1
IFNLR1	Interferon Lambda Receptor 1	CRF2/12, IFNLR, IL-28R1, IL28RA, CRF2-12, IFN-lambda-R1, IL-28R-alpha, IL-28RA, LICR2	http://www.genecards.org/cgi-bin/carddisp.pl?gene=IFNLR1
IGFLR1	IGF Like Family Receptor 1	U2AF1L4, TMEM149	http://www.genecards.org/cgi-bin/carddisp.pl?gene=IGFLR1
IGHV3-38	Immunoglobulin Heavy Variable 3-38 (Non-Functional)	IGHV338, VH	http://www.genecards.org/cgi-bin/carddisp.pl?gene=IGHV3-38
IL16	Interleukin 16	LCF, prIL-16, pro-interleukin-16, NIL16, PRIL16	http://www.genecards.org/cgi-bin/carddisp.pl?gene=IL16
IL20RA	Interleukin 20 Receptor Subunit Alpha	ZcytoR7, CRF2-8, IL-20R-alpha, IL-20R1, IL-20RA	http://www.genecards.org/cgi-bin/carddisp.pl?gene=IL20RA
IL22RA2	Interleukin 22 Receptor Subunit Alpha 2	CRF2X, ZCYTOR16, IL22BP, CRF2-10, CRF2-S1, IL-22BP, IL-22R-alpha-2, IL-22RA2	http://www.genecards.org/cgi-bin/carddisp.pl?gene=IL22RA2
IL6R	Interleukin 6 Receptor	CD126, IL-6R-1, IL6Q, IL6RA, IL6RQ, IL-6R-alpha, IL-6RA, gp80	http://www.genecards.org/cgi-bin/carddisp.pl?gene=IL6R
INA	Internexin Neuronal Intermediate Filament Protein Alpha	alpha-Inx, alpha-internexin, TXBP-1, NEF5, Neurofilament-66, NF-66	http://www.genecards.org/cgi-bin/carddisp.pl?gene=INA
ING4	Inhibitor Of Growth Family Member 4	my036, p29ING4	http://www.genecards.org/cgi-bin/carddisp.pl?gene=ING4
INPP5B	Inositol Polyphosphate-5-Phosphatase B	OCRL2, 5PTase	http://www.genecards.org/cgi-bin/carddisp.pl?gene=INPP5B
INVS	Inversin	inversin, NPHP2, nephrocystin-2, INV, NPH2	http://www.genecards.org/cgi-bin/carddisp.pl?gene=INVS
ISG20L2	Interferon Stimulated Exonuclease Gene 20 Like 2	HSD38	http://www.genecards.org/cgi-bin/carddisp.pl?gene=ISG20L2
ITGA1	Integrin Subunit Alpha 1	VLA-1, CD49a, VLA1	http://www.genecards.org/cgi-bin/carddisp.pl?gene=ITGA1
ITGA10	Integrin Subunit Alpha 10	PRO827	http://www.genecards.org/cgi-bin/carddisp.pl?gene=ITGA10
ITGA8	Integrin Subunit Alpha 8		http://www.genecards.org/cgi-bin/carddisp.pl?gene=ITGA8
JDP2	Jun Dimerization Protein 2	JUNDM2	http://www.genecards.org/cgi-bin/carddisp.pl?gene=JDP2
KCNJ5	Potassium Voltage-Gated Channel Subfamily J Member 5	KIR3.4, LQT13, IRK-4, GIRK-4, KATP-1, CIR, GIRK4, KATP1	http://www.genecards.org/cgi-bin/carddisp.pl?gene=KCNJ5
KCNK5	Potassium Two Pore Domain Channel Subfamily K Member 5	K2p5.1, KCNK5b, TASK-2, TASK2	http://www.genecards.org/cgi-bin/carddisp.pl?gene=KCNK5
KCNN4	Potassium Calcium-Activated Channel Subfamily N Member 4	KCa3.1, SK4, SKCa4, IK1, KCa4, IKCa1, hSK4, hKCa4, hIKCa1, DHS2, IK	http://www.genecards.org/cgi-bin/carddisp.pl?gene=KCNN4
KDM2A	Lysine Demethylase 2A	FBXL11, LILINA, FBL11, KIAA1004, CXXC8, FBL7, JHDM1A	http://www.genecards.org/cgi-bin/carddisp.pl?gene=KDM2A
KIF15	Kinesin Family Member 15	HKLP2, NY-BR-62, KNSL7, KLP2	http://www.genecards.org/cgi-bin/carddisp.pl?gene=KIF15
KIF2C	Kinesin Family Member 2C	CT139, KNSL6, MCAK	http://www.genecards.org/cgi-bin/carddisp.pl?gene=KIF2C
KIFC2	Kinesin Family Member C2		http://www.genecards.org/cgi-bin/carddisp.pl?gene=KIFC2
KLHL32	Kelch Like Family Member 32	KIAA1900, BKLHD5, UG0030H05, dJ21F7.1	http://www.genecards.org/cgi-bin/carddisp.pl?gene=KLHL32
KLHL38	Kelch Like Family Member 38	C8ORFK36	http://www.genecards.org/cgi-bin/carddisp.pl?gene=KLHL38
KMT2B	Lysine Methyltransferase 2B	CXXC10, DYT28, MLL1B, KIAA0304, HRX2, MLL2, MLL4, TRX2, WBP-7, WBP7	http://www.genecards.org/cgi-bin/carddisp.pl?gene=KMT2B
KRT5	Keratin 5	CK5, DDD, KRT5A, DDD1, EBS2, cytokeratin-5, K5, CK-5, Keratin-5	http://www.genecards.org/cgi-bin/carddisp.pl?gene=KRT5
KRT8	Keratin 8	CARD2, CK8, K2C8, KO, cytokeratin-8, Keratin-8, CK-8, CYK8, K8	http://www.genecards.org/cgi-bin/carddisp.pl?gene=KRT8
KRT84	Keratin 84	HB4, KRTHB4, Keratin-84, K84	http://www.genecards.org/cgi-bin/carddisp.pl?gene=KRT84
LALBA	Lactalbumin Alpha	LYZG, alpha-lactalbumin, LYZL7	http://www.genecards.org/cgi-bin/carddisp.pl?gene=LALBA
LARS2	Leucyl-TRNA Synthetase 2, Mitochondrial	HLASA, LEURS, PRLTS4, mtLeuRS, KIAA0028	http://www.genecards.org/cgi-bin/carddisp.pl?gene=LARS2
LENG1	Leukocyte Receptor Cluster Member 1		http://www.genecards.org/cgi-bin/carddisp.pl?gene=LENG1
LENG8	Leukocyte Receptor Cluster Member 8	pp13842, KIAA1932	http://www.genecards.org/cgi-bin/carddisp.pl?gene=LENG8
LENG9	Leukocyte Receptor Cluster Member 9		http://www.genecards.org/cgi-bin/carddisp.pl?gene=LENG9
LIN28A	Lin-28 Homolog A	LIN28, Lin-28A, CSDD1, ZCCHC1, LIN-28	http://www.genecards.org/cgi-bin/carddisp.pl?gene=LIN28A
LIN37	Lin-37 DREAM MuvB Core Complex Component	ZK418.4, lin-37, antolefinin, F25965	http://www.genecards.org/cgi-bin/carddisp.pl?gene=LIN37
LIN7B	Lin-7 Homolog B, Crumbs Cell Polarity Complex Component	hVeli2, hLin7B, VELI2, MALS2, MALS-2, veli-2, Lin-7B	http://www.genecards.org/cgi-bin/carddisp.pl?gene=LIN7B
LIPE	Lipase E, Hormone Sensitive Type	AOMS4, FPLD6, LHS, HSL	http://www.genecards.org/cgi-bin/carddisp.pl?gene=LIPE
LMTK3	Lemur Tyrosine Kinase 3	TYKLM3, KIAA1883, LMR3, PPP1R101	http://www.genecards.org/cgi-bin/carddisp.pl?gene=LMTK3
LRFN3	Leucine Rich Repeat And Fibronectin Type III Domain Containing 3	SALM4, FIGLER1	http://www.genecards.org/cgi-bin/carddisp.pl?gene=LRFN3
M6PR	Mannose-6-Phosphate Receptor, Cation Dependent	CD-M6PR, MPR-46, SMPR, MPRD, CD-MPR, MPR46	http://www.genecards.org/cgi-bin/carddisp.pl?gene=M6PR
MAL2	Mal, T Cell Differentiation Protein 2 (Gene/Pseudogene)		http://www.genecards.org/cgi-bin/carddisp.pl?gene=MAL2
MALL	Mal, T Cell Differentiation Protein Like	BENE	http://www.genecards.org/cgi-bin/carddisp.pl?gene=MALL
MAN1C1	Mannosidase Alpha Class 1C Member 1	pp6318, HMIC, MAN1A3, MAN1C	http://www.genecards.org/cgi-bin/carddisp.pl?gene=MAN1C1
MANEAL	Mannosidase Endo-Alpha Like		http://www.genecards.org/cgi-bin/carddisp.pl?gene=MANEAL
MAPK12	Mitogen-Activated Protein Kinase 12	ERK3, P38GAMMA, PRKM12, SAPK-3, SAPK3, ERK-6, ERK6	http://www.genecards.org/cgi-bin/carddisp.pl?gene=MAPK12
MBOAT1	Membrane Bound O-Acyltransferase Domain Containing 1	OACT1, LPSAT, dJ434O11.1, LPEAT1, LPLAT	http://www.genecards.org/cgi-bin/carddisp.pl?gene=MBOAT1
MBOAT7	Membrane Bound O-Acyltransferase Domain Containing 7	LPLAT, LRC4, MRT57, hMBOA-7, MBOA7, LENG4, BB1, LPIAT, OACT7, h-mboa-7	http://www.genecards.org/cgi-bin/carddisp.pl?gene=MBOAT7
MBP	Myelin Basic Protein	Golli-MBP	http://www.genecards.org/cgi-bin/carddisp.pl?gene=MBP
MDC1	Mediator Of DNA Damage Checkpoint 1	KIAA0170, NFBD1	http://www.genecards.org/cgi-bin/carddisp.pl?gene=MDC1
ME1	Malic Enzyme 1	HUMNDME, MES, NADP-ME	http://www.genecards.org/cgi-bin/carddisp.pl?gene=ME1
MECR	Mitochondrial Trans-2-Enoyl-CoA Reductase	NRBF1, ETR1, FASN2B, DYTOABG, CGI-63, HsNrbf-1, NBRF1, NRBF-1	http://www.genecards.org/cgi-bin/carddisp.pl?gene=MECR
MED18	Mediator Complex Subunit 18	SRB5, p28b	http://www.genecards.org/cgi-bin/carddisp.pl?gene=MED18
MEF2D	Myocyte Enhancer Factor 2D		http://www.genecards.org/cgi-bin/carddisp.pl?gene=MEF2D
MFAP2	Microfibril Associated Protein 2	MFAP-2, MAGP1, MAGP, MAGP-1	http://www.genecards.org/cgi-bin/carddisp.pl?gene=MFAP2
MFAP5	Microfibril Associated Protein 5	AAT9, MAGP-2, MAGP2, MFAP-5, MP25, THE1A-MFAP5	http://www.genecards.org/cgi-bin/carddisp.pl?gene=MFAP5
MFSD1	Major Facilitator Superfamily Domain Containing 1	SMAP-4, SMAP4	http://www.genecards.org/cgi-bin/carddisp.pl?gene=MFSD1
MKL1	Megakaryoblastic Leukemia (Translocation) 1	KIAA1438, MRTF-A, MAL, MKL, BSAC	http://www.genecards.org/cgi-bin/carddisp.pl?gene=MKL1
MMP9	Matrix Metallopeptidase 9	MMP-9, GELB, CLG4B, MANDP2	http://www.genecards.org/cgi-bin/carddisp.pl?gene=MMP9
MMS22L	MMS22 Like, DNA Repair Protein	C6orf167, dJ39B17.2	http://www.genecards.org/cgi-bin/carddisp.pl?gene=MMS22L
MPP6	Membrane Palmitoylated Protein 6	VAM-1, VAM1, PALS2, p55T	http://www.genecards.org/cgi-bin/carddisp.pl?gene=MPP6
MRPL13	Mitochondrial Ribosomal Protein L13	L13mt, L13, L13A, RPL13, RPML13, MRP-L13	http://www.genecards.org/cgi-bin/carddisp.pl?gene=MRPL13
MRPS15	Mitochondrial Ribosomal Protein S15	DC37, MPR-S15, MRP-S15, RPMS15, S15mt	http://www.genecards.org/cgi-bin/carddisp.pl?gene=MRPS15
MSH5	MutS Homolog 5	MUTSH5, POF13, NG23, hMSH5, G7	http://www.genecards.org/cgi-bin/carddisp.pl?gene=MSH5
MTBP	MDM2 Binding Protein	MDM2BP, hMTBP	http://www.genecards.org/cgi-bin/carddisp.pl?gene=MTBP
MTF1	Metal Regulatory Transcription Factor 1	MTF-1, ZRF	http://www.genecards.org/cgi-bin/carddisp.pl?gene=MTF1
MTSS1	MTSS1, I-BAR Domain Containing	MIMB, KIAA0429, MIM, MIMA	http://www.genecards.org/cgi-bin/carddisp.pl?gene=MTSS1
MYCBP	MYC Binding Protein	AMY-1, AMY1	http://www.genecards.org/cgi-bin/carddisp.pl?gene=MYCBP
MYH13	Myosin Heavy Chain 13	myosin-13, MyHC-eo, MyHC-IIL	http://www.genecards.org/cgi-bin/carddisp.pl?gene=MYH13
MYH14	Myosin Heavy Chain 14	DFNA4, KIAA2034, myosin, PNMHH, myosin-14, MYH17, NMHC-II-C, DFNA4A, FP17425, MHC16	http://www.genecards.org/cgi-bin/carddisp.pl?gene=MYH14
MYOCD	Myocardin	myocardin, MYCD	http://www.genecards.org/cgi-bin/carddisp.pl?gene=MYOCD
MYOM3	Myomesin 3	myomesin-3	http://www.genecards.org/cgi-bin/carddisp.pl?gene=MYOM3
NAGPA	N-Acetylglucosamine-1-Phosphodiester Alpha-N-Acetylglucosaminidase	APAA, UCE	http://www.genecards.org/cgi-bin/carddisp.pl?gene=NAGPA
NAT14	N-Acetyltransferase 14 (Putative)	KLP1	http://www.genecards.org/cgi-bin/carddisp.pl?gene=NAT14
NAV2	Neuron Navigator 2	UNC53H2, steerin-2, KIAA1419, HELAD1, POMFIL2, RAINB1, STEERIN2	http://www.genecards.org/cgi-bin/carddisp.pl?gene=NAV2
NAV3	Neuron Navigator 3	KIAA0938, Steerin-3, POMFIL1, STEERIN3, unc53H3	http://www.genecards.org/cgi-bin/carddisp.pl?gene=NAV3
NBEAL2	Neurobeachin Like 2	GPS, BDPLT4, KIAA0540	http://www.genecards.org/cgi-bin/carddisp.pl?gene=NBEAL2
NCAPD2	Non-SMC Condensin I Complex Subunit D2	CNAP1, KIAA0159, hCAP-D2, CAP-D2, MCPH21, CAPD2	http://www.genecards.org/cgi-bin/carddisp.pl?gene=NCAPD2
NCK2	NCK Adaptor Protein 2	NCKbeta, Nck-2, GRB4	http://www.genecards.org/cgi-bin/carddisp.pl?gene=NCK2
NCOA7	Nuclear Receptor Coactivator 7	NCOA7-AS, Nbla00052, Nbla10993, TLDC4, dJ187J11.3, ERAP140, ESNA1	http://www.genecards.org/cgi-bin/carddisp.pl?gene=NCOA7
NDUFAF6	NADH:Ubiquinone Oxidoreductase Complex Assembly Factor 6	C8orf38	http://www.genecards.org/cgi-bin/carddisp.pl?gene=NDUFAF6
NDUFV1	NADH:Ubiquinone Oxidoreductase Core Subunit V1	CI-51K, CI51KD, CI-51kD, UQOR1	http://www.genecards.org/cgi-bin/carddisp.pl?gene=NDUFV1
NECAP1	NECAP Endocytosis Associated 1	NECAP-1, EIEE21	http://www.genecards.org/cgi-bin/carddisp.pl?gene=NECAP1
NFKBID	NFKB Inhibitor Delta	TA-NFKBH, IkappaBNS, I-kappa-B-delta, IkappaBdelta, IKBNS, IkB-delta	http://www.genecards.org/cgi-bin/carddisp.pl?gene=NFKBID
NKD2	Naked Cuticle Homolog 2	Naked2, Naked-2, hNkd2	http://www.genecards.org/cgi-bin/carddisp.pl?gene=NKD2
NLRC5	NLR Family CARD Domain Containing 5	NOD4, NOD27, CLR16.1	http://www.genecards.org/cgi-bin/carddisp.pl?gene=NLRC5
NOG	Noggin	SYNS1A, noggin, SYM1, SYNS1	http://www.genecards.org/cgi-bin/carddisp.pl?gene=NOG
NOP2	NOP2 Nucleolar Protein	NOP120, p120, NOL1, NSUN1	http://www.genecards.org/cgi-bin/carddisp.pl?gene=NOP2
NPY	Neuropeptide Y	PYY4	http://www.genecards.org/cgi-bin/carddisp.pl?gene=NPY
NR0B2	Nuclear Receptor Subfamily 0 Group B Member 2	SHP, SHP1	http://www.genecards.org/cgi-bin/carddisp.pl?gene=NR0B2
NR2E3	Nuclear Receptor Subfamily 2 Group E Member 3	rd7, ESCS, RP37, RNR, PNR	http://www.genecards.org/cgi-bin/carddisp.pl?gene=NR2E3
NR4A3	Nuclear Receptor Subfamily 4 Group A Member 3	CHN, CSMF, NOR1, TEC, MINOR	http://www.genecards.org/cgi-bin/carddisp.pl?gene=NR4A3
NSMCE2	NSE2 (MMS21) Homolog, SMC5-SMC6 Complex SUMO Ligase	NSE2, ZMIZ7, hMMS21, C8orf36, MMS21	http://www.genecards.org/cgi-bin/carddisp.pl?gene=NSMCE2
NXPH1	Neurexophilin 1	NPH1, Nbla00697, neurexophilin-1	http://www.genecards.org/cgi-bin/carddisp.pl?gene=NXPH1
OSBPL3	Oxysterol Binding Protein Like 3	ORP3, KIAA0704, ORP-3, OSBP3	http://www.genecards.org/cgi-bin/carddisp.pl?gene=OSBPL3
OSGIN2	Oxidative Stress Induced Growth Inhibitor Family Member 2	C8orf1, hT41	http://www.genecards.org/cgi-bin/carddisp.pl?gene=OSGIN2
OTOA	Otoancorin	otoancorin, DFNB22, CT108	http://www.genecards.org/cgi-bin/carddisp.pl?gene=OTOA
OXR1	Oxidation Resistance 1	TLDC3, Nbla00307	http://www.genecards.org/cgi-bin/carddisp.pl?gene=OXR1
P3H3	Prolyl 3-Hydroxylase 3	GRCB, HSU47926, LEPREL2	http://www.genecards.org/cgi-bin/carddisp.pl?gene=P3H3
PAK3	P21 (RAC1) Activated Kinase 3	Beta-PAK, Oligophrenin-3, OPHN3, PAK-3, bPAK, ARA, PAK3beta, MRX47, MRX30	http://www.genecards.org/cgi-bin/carddisp.pl?gene=PAK3
PAQR7	Progestin And AdipoQ Receptor Family Member 7	2310021M12Rik, MPRA, PGLP, mSR, MRPA	http://www.genecards.org/cgi-bin/carddisp.pl?gene=PAQR7
PARD3B	Par-3 Family Cell Polarity Regulator Beta	PAR3beta, ALS2CR19, PAR3-beta, PAR3B, PAR3L	http://www.genecards.org/cgi-bin/carddisp.pl?gene=PARD3B
PARP14	Poly(ADP-Ribose) Polymerase Family Member 14	pART8, KIAA1268, ARTD8, BAL2, PARP-14	http://www.genecards.org/cgi-bin/carddisp.pl?gene=PARP14
PBXIP1	PBX Homeobox Interacting Protein 1	HPIP	http://www.genecards.org/cgi-bin/carddisp.pl?gene=PBXIP1
PCSK7	Proprotein Convertase Subtilisin/Kexin Type 7	hPC8, LPC, PC7, PC8, SPC7	http://www.genecards.org/cgi-bin/carddisp.pl?gene=PCSK7
PDE11A	Phosphodiesterase 11A	PPNAD2	http://www.genecards.org/cgi-bin/carddisp.pl?gene=PDE11A
PDP1	Pyruvate Dehyrogenase Phosphatase Catalytic Subunit 1	PDH, PDPC, PPM2A, PPM2C, PDP	http://www.genecards.org/cgi-bin/carddisp.pl?gene=PDP1
PHACTR4	Phosphatase And Actin Regulator 4	PPP1R124	http://www.genecards.org/cgi-bin/carddisp.pl?gene=PHACTR4
PIGV	Phosphatidylinositol Glycan Anchor Biosynthesis Class V	HPMRS1, GPI-MT-II, PIG-V	http://www.genecards.org/cgi-bin/carddisp.pl?gene=PIGV
PIM2	Pim-2 Proto-Oncogene, Serine/Threonine Kinase	pim-2h	http://www.genecards.org/cgi-bin/carddisp.pl?gene=PIM2
PINLYP	Phospholipase A2 Inhibitor And LY6/PLAUR Domain Containing		http://www.genecards.org/cgi-bin/carddisp.pl?gene=PINLYP
PIP5K1A	Phosphatidylinositol-4-Phosphate 5-Kinase Type 1 Alpha	PIP5K1-alpha, PIP5KIalpha	http://www.genecards.org/cgi-bin/carddisp.pl?gene=PIP5K1A
PITPNC1	Phosphatidylinositol Transfer Protein Cytoplasmic 1	M-RDGB-beta, MRDGBbeta, RDGB-BETA, RDGBB, RDGBB1, RdgBbeta	http://www.genecards.org/cgi-bin/carddisp.pl?gene=PITPNC1
PKLR	Pyruvate Kinase L/R	PKRL, PKR, RPK, PK1, PKL	http://www.genecards.org/cgi-bin/carddisp.pl?gene=PKLR
PLEC	Plectin	EBSND, EBSO, EBSOG, EBSPA, LGMD2Q, PLEC1b, plectin, EBS1, PLEC1, Plectin-1, HD1, PCN, PLTN, EBSMD	http://www.genecards.org/cgi-bin/carddisp.pl?gene=PLEC
PLEKHA8	Pleckstrin Homology Domain Containing A8	FAPP2, FAPP-2, hFAPP2	http://www.genecards.org/cgi-bin/carddisp.pl?gene=PLEKHA8
PLEKHG4B	Pleckstrin Homology And RhoGEF Domain Containing G4B	KIAA1909	http://www.genecards.org/cgi-bin/carddisp.pl?gene=PLEKHG4B
PLXNA2	Plexin A2	plexin-A2, PLXN2, OCT, KIAA0463	http://www.genecards.org/cgi-bin/carddisp.pl?gene=PLXNA2
PNISR	PNN Interacting Serine And Arginine Rich Protein	C6orf111, bA98I9.2, HSPC306, SRrp130, SFRS18	http://www.genecards.org/cgi-bin/carddisp.pl?gene=PNISR
PNRC2	Proline Rich Nuclear Receptor Coactivator 2		http://www.genecards.org/cgi-bin/carddisp.pl?gene=PNRC2
POLR3C	RNA Polymerase III Subunit C	RPC62, RPC3	http://www.genecards.org/cgi-bin/carddisp.pl?gene=POLR3C
PON1	Paraoxonase 1	ESA, MVCD5, PON, K-45	http://www.genecards.org/cgi-bin/carddisp.pl?gene=PON1
POU2F2	POU Class 2 Homeobox 2	OTF2, OCT2, OTF-2, Oct-2	http://www.genecards.org/cgi-bin/carddisp.pl?gene=POU2F2
POU3F1	POU Class 3 Homeobox 1	OTF-6, OCT6, SCIP, OTF6, Oct-6	http://www.genecards.org/cgi-bin/carddisp.pl?gene=POU3F1
POU3F2	POU Class 3 Homeobox 2	OTF7, oct-7, brn-2, Brain-2, BRN2, OCT7, N-Oct3, POUF3, OTF-7	http://www.genecards.org/cgi-bin/carddisp.pl?gene=POU3F2
PPP1R14D	Protein Phosphatase 1 Regulatory Inhibitor Subunit 14D	GBPI-1, CPI17-like, GBPI1, GBPI	http://www.genecards.org/cgi-bin/carddisp.pl?gene=PPP1R14D
PPP1R8	Protein Phosphatase 1 Regulatory Subunit 8	ARD-1, PRO2047, ARD1, NIPP-1, NIPP1	http://www.genecards.org/cgi-bin/carddisp.pl?gene=PPP1R8
PRDM13	PR/SET Domain 13	PFM10, MU-MB-20.220	http://www.genecards.org/cgi-bin/carddisp.pl?gene=PRDM13
PREX2	Phosphatidylinositol-3,4,5-Trisphosphate Dependent Rac Exchange Factor 2	DEP.2, P-REX2, PPP1R129, DEPDC2	http://www.genecards.org/cgi-bin/carddisp.pl?gene=PREX2
PRKCG	Protein Kinase C Gamma	PKCC, SCA14, PKC-gamma, PKCG	http://www.genecards.org/cgi-bin/carddisp.pl?gene=PRKCG
PROSER3	Proline And Serine Rich 3	C19orf55	http://www.genecards.org/cgi-bin/carddisp.pl?gene=PROSER3
PRRT1	Proline Rich Transmembrane Protein 1	IFITMD7, C6orf31, DSPD1, NG5	http://www.genecards.org/cgi-bin/carddisp.pl?gene=PRRT1
PRSS1	Serine Protease 1	trypsin-1, TRY1, Beta-trypsin, TRP1, TRYP1, TRY4	http://www.genecards.org/cgi-bin/carddisp.pl?gene=PRSS1
PRSS35	Serine Protease 35	dJ223E3.1, C6orf158	http://www.genecards.org/cgi-bin/carddisp.pl?gene=PRSS35
PSENEN	Presenilin Enhancer, Gamma-Secretase Subunit	MSTP064, PEN-2, ACNINV2, MDS033, PEN2	http://www.genecards.org/cgi-bin/carddisp.pl?gene=PSENEN
PTK2	Protein Tyrosine Kinase 2	FADK, FAK, FAK1, FRNK, PPP1R71, p125FAK, pp125FAK	http://www.genecards.org/cgi-bin/carddisp.pl?gene=PTK2
PTP4A3	Protein Tyrosine Phosphatase Type IVA, Member 3	PRL-3, PRL-R, PRL3	http://www.genecards.org/cgi-bin/carddisp.pl?gene=PTP4A3
PTPN3	Protein Tyrosine Phosphatase, Non-Receptor Type 3	PTP-H1, PTPH1	http://www.genecards.org/cgi-bin/carddisp.pl?gene=PTPN3
PTPN6	Protein Tyrosine Phosphatase, Non-Receptor Type 6	HCPH, HPTP1C, SHP-1, SHP-1L, SHP1, PTP1C, HCP, PTP-1C, SH-PTP1	http://www.genecards.org/cgi-bin/carddisp.pl?gene=PTPN6
PVR	Poliovirus Receptor	CD155, HVED, NECL5, TAGE4, Necl-5, PVS	http://www.genecards.org/cgi-bin/carddisp.pl?gene=PVR
RAB3B	RAB3B, Member RAS Oncogene Family		http://www.genecards.org/cgi-bin/carddisp.pl?gene=RAB3B
RABAC1	Rab Acceptor 1	YIP3, PRA1, PRAF1	http://www.genecards.org/cgi-bin/carddisp.pl?gene=RABAC1
RAD21	RAD21 Cohesin Complex Component	CDLS4, HRAD21, MCD1, kleisin, KIAA0078, HR21, NXP-1, NXP1, SCC1, hHR21	http://www.genecards.org/cgi-bin/carddisp.pl?gene=RAD21
RAPGEF5	Rap Guanine Nucleotide Exchange Factor 5	REPAC, KIAA0277, MRGEF, GFR, MR-GEF	http://www.genecards.org/cgi-bin/carddisp.pl?gene=RAPGEF5
RASIP1	Ras Interacting Protein 1	RAIN	http://www.genecards.org/cgi-bin/carddisp.pl?gene=RASIP1
RBFOX1	RNA Binding Fox-1 Homolog 1	A2BP1, A2BP, FOX-1, 2BP1, HRNBP1, FOX1	http://www.genecards.org/cgi-bin/carddisp.pl?gene=RBFOX1
RBM12B	RNA Binding Motif Protein 12B	MGC:33837	http://www.genecards.org/cgi-bin/carddisp.pl?gene=RBM12B
RBM4B	RNA Binding Motif Protein 4B	RBM4L, ZCCHC15, ZCCHC21B, ZCRB3B, RBM30	http://www.genecards.org/cgi-bin/carddisp.pl?gene=RBM4B
RBMS3	RNA Binding Motif Single Stranded Interacting Protein 3		http://www.genecards.org/cgi-bin/carddisp.pl?gene=RBMS3
RCC1	Regulator Of Chromosome Condensation 1	CHC1, SNHG3-RCC1, RCC1-I	http://www.genecards.org/cgi-bin/carddisp.pl?gene=RCC1
RCVRN	Recoverin	RCV1, recoverin	http://www.genecards.org/cgi-bin/carddisp.pl?gene=RCVRN
RDH14	Retinol Dehydrogenase 14	SDR7C4, PAN2	http://www.genecards.org/cgi-bin/carddisp.pl?gene=RDH14
RHBDL2	Rhomboid Like 2	RRP2	http://www.genecards.org/cgi-bin/carddisp.pl?gene=RHBDL2
RHBG	Rh Family B Glycoprotein (Gene/Pseudogene)	SLC42A2	http://www.genecards.org/cgi-bin/carddisp.pl?gene=RHBG
RIIAD1	Regulatory Subunit Of Type II PKA R-Subunit (RIIa) Domain Containing 1	NCRNA00166, C1orf230	http://www.genecards.org/cgi-bin/carddisp.pl?gene=RIIAD1
RIMS2	Regulating Synaptic Membrane Exocytosis 2	OBOE, RIM2, RAB3IP3, KIAA0751	http://www.genecards.org/cgi-bin/carddisp.pl?gene=RIMS2
RNF115	Ring Finger Protein 115	ZNF364, BCA2	http://www.genecards.org/cgi-bin/carddisp.pl?gene=RNF115
RNF144B	Ring Finger Protein 144B	PIR2, bA528A10.3, p53RFP, IBRDC2	http://www.genecards.org/cgi-bin/carddisp.pl?gene=RNF144B
RNF41	Ring Finger Protein 41	FLRF, NRDP1, SBBI03	http://www.genecards.org/cgi-bin/carddisp.pl?gene=RNF41
RPA2	Replication Protein A2	RPA32, RPA34, REPA2	http://www.genecards.org/cgi-bin/carddisp.pl?gene=RPA2
RPL18	Ribosomal Protein L18	L18	http://www.genecards.org/cgi-bin/carddisp.pl?gene=RPL18
RPS19	Ribosomal Protein S19	DBA, DBA1, S19, eS19	http://www.genecards.org/cgi-bin/carddisp.pl?gene=RPS19
RPS9	Ribosomal Protein S9	S9	http://www.genecards.org/cgi-bin/carddisp.pl?gene=RPS9
RRAGC	Ras Related GTP Binding C	TIB929, RagC, GTR2	http://www.genecards.org/cgi-bin/carddisp.pl?gene=RRAGC
RRNAD1	Ribosomal RNA Adenine Dimethylase Domain Containing 1	C1orf66, METTL25B, CGI-41	http://www.genecards.org/cgi-bin/carddisp.pl?gene=RRNAD1
RSPO1	R-Spondin 1	CRISTIN3, R-spondin-1, RSPO, hRspo1	http://www.genecards.org/cgi-bin/carddisp.pl?gene=RSPO1
RSPO2	R-Spondin 2	hRspo2, R-spondin-2, CRISTIN2	http://www.genecards.org/cgi-bin/carddisp.pl?gene=RSPO2
RUSC1	RUN And SH3 Domain Containing 1	NESCA	http://www.genecards.org/cgi-bin/carddisp.pl?gene=RUSC1
RXRB	Retinoid X Receptor Beta	NR2B2, RCoR-1, DAUDI6, H-2RIIBP	http://www.genecards.org/cgi-bin/carddisp.pl?gene=RXRB
S100A16	S100 Calcium Binding Protein A16	DT1P1A7, AAG13, S100F	http://www.genecards.org/cgi-bin/carddisp.pl?gene=S100A16
S100A5	S100 Calcium Binding Protein A5	S100D	http://www.genecards.org/cgi-bin/carddisp.pl?gene=S100A5
SALL3	Spalt Like Transcription Factor 3	hSALL3, ZNF796	http://www.genecards.org/cgi-bin/carddisp.pl?gene=SALL3
SBK3	SH3 Domain Binding Kinase Family Member 3	SGK110	http://www.genecards.org/cgi-bin/carddisp.pl?gene=SBK3
SCRT1	Scratch Family Transcriptional Repressor 1	ZNF898, hScrt, SCRT	http://www.genecards.org/cgi-bin/carddisp.pl?gene=SCRT1
SERINC2	Serine Incorporator 2	TDE2L, PRO0899, TDE2, FKSG84	http://www.genecards.org/cgi-bin/carddisp.pl?gene=SERINC2
SETD2	SET Domain Containing 2	HIP-1, HYPB, KMT3A, HIF-1, KIAA1732, hSET2, HBP231, HSPC069, LLS, HIF1, SET2, p231HBP	http://www.genecards.org/cgi-bin/carddisp.pl?gene=SETD2
SETDB1	SET Domain Bifurcated 1	H3-K9-HMTase4, KG1T, TDRD21, KIAA0067, ESET, KMT1E	http://www.genecards.org/cgi-bin/carddisp.pl?gene=SETDB1
SH3D21	SH3 Domain Containing 21	C1orf113	http://www.genecards.org/cgi-bin/carddisp.pl?gene=SH3D21
SHC1	SHC Adaptor Protein 1	SHC, SHCA	http://www.genecards.org/cgi-bin/carddisp.pl?gene=SHC1
SIGLEC15	Sialic Acid Binding Ig Like Lectin 15	HsT1361, SIGLEC-15, CD33L3	http://www.genecards.org/cgi-bin/carddisp.pl?gene=SIGLEC15
SKAP2	Src Kinase Associated Phosphoprotein 2	PRAP, SCAP2, SKAP-HOM, SKAP55R, RA70, SAPS, SKAP-55HOM	http://www.genecards.org/cgi-bin/carddisp.pl?gene=SKAP2
SLC25A32	Solute Carrier Family 25 Member 32	RREI, MFTC, MFT	http://www.genecards.org/cgi-bin/carddisp.pl?gene=SLC25A32
SLC26A6	Solute Carrier Family 26 Member 6	Pendrin-L1	http://www.genecards.org/cgi-bin/carddisp.pl?gene=SLC26A6
SLC40A1	Solute Carrier Family 40 Member 1	HFE4, MST079, MSTP079, MTP1, SLC11A3, Ferroportin-1, FPN1, IREG1	http://www.genecards.org/cgi-bin/carddisp.pl?gene=SLC40A1
SLC6A3	Solute Carrier Family 6 Member 3	PKDYS, DAT1, DAT	http://www.genecards.org/cgi-bin/carddisp.pl?gene=SLC6A3
SLC9A1	Solute Carrier Family 9 Member A1	LIKNS, PPP1R143, APNH, NHE1, APNH1, NHE-1	http://www.genecards.org/cgi-bin/carddisp.pl?gene=SLC9A1
SLC9B2	Solute Carrier Family 9 Member B2	NHE10, NHEDC2, NHA2	http://www.genecards.org/cgi-bin/carddisp.pl?gene=SLC9B2
SMPDL3B	Sphingomyelin Phosphodiesterase Acid Like 3B	ASMLPD, ASML3B	http://www.genecards.org/cgi-bin/carddisp.pl?gene=SMPDL3B
SNAP91	Synaptosome Associated Protein 91	KIAA0656, AP180, CALM	http://www.genecards.org/cgi-bin/carddisp.pl?gene=SNAP91
SNED1	Sushi, Nidogen And EGF Like Domains 1	Snep, SST3, IRE-BP1	http://www.genecards.org/cgi-bin/carddisp.pl?gene=SNED1
SNIP1	Smad Nuclear Interacting Protein 1	PML1, PMRED	http://www.genecards.org/cgi-bin/carddisp.pl?gene=SNIP1
SNTB1	Syntrophin Beta 1	59-DAP, A1B, SNT2, beta-1-syntrophin, syntrophin-2, SNT2B1, BSYN2, DAPA1B, TIP-43	http://www.genecards.org/cgi-bin/carddisp.pl?gene=SNTB1
SOX4	SRY-Box 4	EVI16	http://www.genecards.org/cgi-bin/carddisp.pl?gene=SOX4
SPAG9	Sperm Associated Antigen 9	PIG6, JIP4, HLC6, HLC4, PHET, HSS, CT89, HLC-6, JIP-4, JLP, SYD1, KIAA0516, MAPK8IP4	http://www.genecards.org/cgi-bin/carddisp.pl?gene=SPAG9
SPHK2	Sphingosine Kinase 2	SK-2, SPK-2	http://www.genecards.org/cgi-bin/carddisp.pl?gene=SPHK2
SPIRE1	Spire Type Actin Nucleation Factor 1	KIAA1135, SPIR1, Spir-1	http://www.genecards.org/cgi-bin/carddisp.pl?gene=SPIRE1
SQLE	Squalene Epoxidase	ERG1, SE	http://www.genecards.org/cgi-bin/carddisp.pl?gene=SQLE
SRI	Sorcin	V19, CP-22, sorcin, CP22, H_RG167B05.1, SCN	http://www.genecards.org/cgi-bin/carddisp.pl?gene=SRI
ST14	Suppression Of Tumorigenicity 14	HAI, MTSP1, ARCI11, TMPRSS14, prostamin, MT-SP1, PRSS14, Matriptase, TADG15, SNC19, epithin	http://www.genecards.org/cgi-bin/carddisp.pl?gene=ST14
STX12	Syntaxin 12	STX13, STX14, syntaxin-12	http://www.genecards.org/cgi-bin/carddisp.pl?gene=STX12
STX17	Syntaxin 17	syntaxin-17	http://www.genecards.org/cgi-bin/carddisp.pl?gene=STX17
STYK1	Serine/Threonine/Tyrosine Kinase 1	SuRTK106, NOK	http://www.genecards.org/cgi-bin/carddisp.pl?gene=STYK1
SV2B	Synaptic Vesicle Glycoprotein 2B	HsT19680, KIAA0735	http://www.genecards.org/cgi-bin/carddisp.pl?gene=SV2B
SYBU	Syntabulin	OCSYN, SNPHL, syntabulin, KIAA1472, GOLSYN, syntaphilin-like	http://www.genecards.org/cgi-bin/carddisp.pl?gene=SYBU
TACC3	Transforming Acidic Coiled-Coil Containing Protein 3	ERIC-1, ERIC1	http://www.genecards.org/cgi-bin/carddisp.pl?gene=TACC3
TAF12	TATA-Box Binding Protein Associated Factor 12	TAF2J, TAF15, TAFII20/TAFII15, TAFII20, TAFII-20/TAFII-15	http://www.genecards.org/cgi-bin/carddisp.pl?gene=TAF12
TAX1BP1	Tax1 Binding Protein 1	CALCOCO3, TXBP151, T6BP	http://www.genecards.org/cgi-bin/carddisp.pl?gene=TAX1BP1
TBC1D31	TBC1 Domain Family Member 31	WDR67, Gm85	http://www.genecards.org/cgi-bin/carddisp.pl?gene=TBC1D31
TBRG4	Transforming Growth Factor Beta Regulator 4	H_TD2522F11.8, KIAA0948, CPR2, FASTKD4	http://www.genecards.org/cgi-bin/carddisp.pl?gene=TBRG4
TCEA3	Transcription Elongation Factor A3	TFIIS.H, TFIISH, TFIIS	http://www.genecards.org/cgi-bin/carddisp.pl?gene=TCEA3
TEX10	Testis Expressed 10	Ipi1, bA208F1.2	http://www.genecards.org/cgi-bin/carddisp.pl?gene=TEX10
THEM4	Thioesterase Superfamily Member 4	CTMP	http://www.genecards.org/cgi-bin/carddisp.pl?gene=THEM4
THEMIS2	Thymocyte Selection Associated Family Member 2	ICB1, C1orf38, ICB-1	http://www.genecards.org/cgi-bin/carddisp.pl?gene=THEMIS2
THRAP3	Thyroid Hormone Receptor Associated Protein 3	Trap150, BCLAF2	http://www.genecards.org/cgi-bin/carddisp.pl?gene=THRAP3
TMBIM1	Transmembrane BAX Inhibitor Motif Containing 1	LFG3, MST100, MSTP100, PP1201, RECS1	http://www.genecards.org/cgi-bin/carddisp.pl?gene=TMBIM1
TMC4	Transmembrane Channel Like 4		http://www.genecards.org/cgi-bin/carddisp.pl?gene=TMC4
TMEM132B	Transmembrane Protein 132B	KIAA1786, KIAA1906	http://www.genecards.org/cgi-bin/carddisp.pl?gene=TMEM132B
TMEM145	Transmembrane Protein 145		http://www.genecards.org/cgi-bin/carddisp.pl?gene=TMEM145
TMEM158	Transmembrane Protein 158 (Gene/Pseudogene)	BBP, HBBP, RIS1, p40BBP	http://www.genecards.org/cgi-bin/carddisp.pl?gene=TMEM158
TMEM222	Transmembrane Protein 222	C1orf160	http://www.genecards.org/cgi-bin/carddisp.pl?gene=TMEM222
TMEM236	Transmembrane Protein 236	FAM23B, FAM23A, bA162I21.2, bA16O1.2	http://www.genecards.org/cgi-bin/carddisp.pl?gene=TMEM236
TMEM245	Transmembrane Protein 245	C9orf5, CG-2, CG2	http://www.genecards.org/cgi-bin/carddisp.pl?gene=TMEM245
TMEM65	Transmembrane Protein 65		http://www.genecards.org/cgi-bin/carddisp.pl?gene=TMEM65
TMEM67	Transmembrane Protein 67	JBTS6, MECKELIN, NPHP11, TNEM67, MKS3	http://www.genecards.org/cgi-bin/carddisp.pl?gene=TMEM67
TMEM74	Transmembrane Protein 74	NET36	http://www.genecards.org/cgi-bin/carddisp.pl?gene=TMEM74
TNFRSF11B	TNF Receptor Superfamily Member 11b	TR1, PDB5, osteoprotegerin, OCIF, OPG	http://www.genecards.org/cgi-bin/carddisp.pl?gene=TNFRSF11B
TNFRSF1A	TNF Receptor Superfamily Member 1A	TNFR1, TNF-R1, TNF-RI, TBP1, FPF, CD120a, TNFR60, TNFR55, p55-R, TNF-R55, TNF-R-I, TNF-R, p55, p60, TNFAR, TNFR-I	http://www.genecards.org/cgi-bin/carddisp.pl?gene=TNFRSF1A
TNFRSF25	TNF Receptor Superfamily Member 25	WSL-1, WSL-LR, TRAMP, APO-3, TR3, APO3, TNFRSF12, WSL, WSL1, DDR3, DR3, LARD	http://www.genecards.org/cgi-bin/carddisp.pl?gene=TNFRSF25
TNKS2	Tankyrase 2	PARP-5b, PARP-5c, PARP5C, pART6, tankyrase-2, ARTD6, PARP5B, TANK2, TNKL, TNKS-2	http://www.genecards.org/cgi-bin/carddisp.pl?gene=TNKS2
TNXB	Tenascin XB	EDS3, EDSCLL, TENX, TNXBS, VUR8, XBS, tenascin-X, TNXB1, TNXB2, HXBL, TN-X, TNX, XB	http://www.genecards.org/cgi-bin/carddisp.pl?gene=TNXB
TOMM40	Translocase Of Outer Mitochondrial Membrane 40	TOM40, p38.5, C19orf1, PEREC1, D19S1177E, PER-EC1	http://www.genecards.org/cgi-bin/carddisp.pl?gene=TOMM40
TPBG	Trophoblast Glycoprotein	5T4AG, WAIF1, M6P1, 5T4	http://www.genecards.org/cgi-bin/carddisp.pl?gene=TPBG
TPBGL	Trophoblast Glycoprotein Like		http://www.genecards.org/cgi-bin/carddisp.pl?gene=TPBGL
TPI1	Triosephosphate Isomerase 1	TIM, TPI, HEL-S-49, TPID	http://www.genecards.org/cgi-bin/carddisp.pl?gene=TPI1
TPPP	Tubulin Polymerization Promoting Protein	TPPP/p25, TPPP1, p24, p25-alpha, p25, p25alpha	http://www.genecards.org/cgi-bin/carddisp.pl?gene=TPPP
TRIM47	Tripartite Motif Containing 47	RNF100, GOA	http://www.genecards.org/cgi-bin/carddisp.pl?gene=TRIM47
TRIO	Trio Rho Guanine Nucleotide Exchange Factor	MEBAS, MRD44, tgat, ARHGEF23	http://www.genecards.org/cgi-bin/carddisp.pl?gene=TRIO
TRMT11	TRNA Methyltransferase 11 Homolog	MDS024, TRM11, TRMT11-1, C6orf75	http://www.genecards.org/cgi-bin/carddisp.pl?gene=TRMT11
TRPV5	Transient Receptor Potential Cation Channel Subfamily V Member 5	CAT2, ECAC1, ECaC, TrpV5, OTRPC3	http://www.genecards.org/cgi-bin/carddisp.pl?gene=TRPV5
TRPV6	Transient Receptor Potential Cation Channel Subfamily V Member 6	ABP/ZF, CAT1, CATL, LP6728, HSA277909, ZFAB, ECAC2, CaT-L, CaT-like, TrpV6	http://www.genecards.org/cgi-bin/carddisp.pl?gene=TRPV6
TSHZ1	Teashirt Zinc Finger Homeobox 1	NY-CO-33, CAA, SDCCAG33, TSH1	http://www.genecards.org/cgi-bin/carddisp.pl?gene=TSHZ1
TSTD1	Thiosulfate Sulfurtransferase Like Domain Containing 1	KAT, TST	http://www.genecards.org/cgi-bin/carddisp.pl?gene=TSTD1
TSTD3	Thiosulfate Sulfurtransferase (Rhodanese)-Like Domain Containing 3		http://www.genecards.org/cgi-bin/carddisp.pl?gene=TSTD3
TTK	TTK Protein Kinase	CT96, ESK, MPH1, MPS1, MPS1L1, PYT	http://www.genecards.org/cgi-bin/carddisp.pl?gene=TTK
TTYH1	Tweety Family Member 1	hTTY1	http://www.genecards.org/cgi-bin/carddisp.pl?gene=TTYH1
TUFT1	Tuftelin 1	tuftelin	http://www.genecards.org/cgi-bin/carddisp.pl?gene=TUFT1
TWIST1	Twist Family BHLH Transcription Factor 1	ACS3, TWIST, BHLHA38, H-twist, craniosynostosis, CRS, BPES3, SWCOS, SCS, BPES2, CRS1, CSO	http://www.genecards.org/cgi-bin/carddisp.pl?gene=TWIST1
TYROBP	TYRO Protein Tyrosine Kinase Binding Protein	PLOSL, DAP12, KARAP	http://www.genecards.org/cgi-bin/carddisp.pl?gene=TYROBP
U2AF2	U2 Small Nuclear RNA Auxiliary Factor 2	hU2AF65, U2AF65, hU2AF(65)	http://www.genecards.org/cgi-bin/carddisp.pl?gene=U2AF2
UBE2C	Ubiquitin Conjugating Enzyme E2 C	dJ447F3.2, UbcH10	http://www.genecards.org/cgi-bin/carddisp.pl?gene=UBE2C
UBE2S	Ubiquitin Conjugating Enzyme E2 S	E2-EPF5, EPF5, E2-EPF, E2EPF	http://www.genecards.org/cgi-bin/carddisp.pl?gene=UBE2S
UBE3D	Ubiquitin Protein Ligase E3D	YJR141W, C6orf157, UBE2CBP, H10BH	http://www.genecards.org/cgi-bin/carddisp.pl?gene=UBE3D
UBXN11	UBX Domain Protein 11	COA-1, PP2243, SOCI, socius, UBXD5, SOC	http://www.genecards.org/cgi-bin/carddisp.pl?gene=UBXN11
UHRF1BP1	UHRF1 Binding Protein 1	C6orf107, dJ349A12.1, ICBP90	http://www.genecards.org/cgi-bin/carddisp.pl?gene=UHRF1BP1
ULK4	Unc-51 Like Kinase 4	FAM7C1, REC01035	http://www.genecards.org/cgi-bin/carddisp.pl?gene=ULK4
UPP1	Uridine Phosphorylase 1	UP, UDRPASE, UPASE, UPP	http://www.genecards.org/cgi-bin/carddisp.pl?gene=UPP1
USF2	Upstream Transcription Factor 2, C-Fos Interacting	FIP, bHLHb12	http://www.genecards.org/cgi-bin/carddisp.pl?gene=USF2
USP45	Ubiquitin Specific Peptidase 45		http://www.genecards.org/cgi-bin/carddisp.pl?gene=USP45
VAMP5	Vesicle Associated Membrane Protein 5	VAMP-5, Myobrevin	http://www.genecards.org/cgi-bin/carddisp.pl?gene=VAMP5
VWDE	Von Willebrand Factor D And EGF Domains		http://www.genecards.org/cgi-bin/carddisp.pl?gene=VWDE
WDR73	WD Repeat Domain 73	GAMOS, GAMOS1, HSPC264	http://www.genecards.org/cgi-bin/carddisp.pl?gene=WDR73
WDTC1	WD And Tetratricopeptide Repeats 1	ADP, KIAA1037, DCAF9	http://www.genecards.org/cgi-bin/carddisp.pl?gene=WDTC1
XRCC1	X-Ray Repair Cross Complementing 1	RCC, SCAR26	http://www.genecards.org/cgi-bin/carddisp.pl?gene=XRCC1
YRDC	YrdC N6-Threonylcarbamoyltransferase Domain Containing	SUA5, DRIP3, IRIP, hIRIP	http://www.genecards.org/cgi-bin/carddisp.pl?gene=YRDC
ZBED8	Zinc Finger BED-Type Containing 8	C5orf54, Buster3	http://www.genecards.org/cgi-bin/carddisp.pl?gene=ZBED8
ZBTB25	Zinc Finger And BTB Domain Containing 25	C14orf51, ZNF46, KUP	http://www.genecards.org/cgi-bin/carddisp.pl?gene=ZBTB25
ZBTB32	Zinc Finger And BTB Domain Containing 32	TZFP, FAZF, Rog, ZNF538, FAXF	http://www.genecards.org/cgi-bin/carddisp.pl?gene=ZBTB32
ZBTB7B	Zinc Finger And BTB Domain Containing 7B	ZFP67, Zfp-67, hcKrox, ZBTB15, ZNF857B, CKROX, THPOK, c-KROX	http://www.genecards.org/cgi-bin/carddisp.pl?gene=ZBTB7B
ZDHHC18	Zinc Finger DHHC-Type Containing 18	DHHC-18, DHHC18	http://www.genecards.org/cgi-bin/carddisp.pl?gene=ZDHHC18
ZFP41	ZFP41 Zinc Finger Protein	zfp-41, ZNF753	http://www.genecards.org/cgi-bin/carddisp.pl?gene=ZFP41
ZFR	Zinc Finger RNA Binding Protein	SPG71, ZFR1, hZFR	http://www.genecards.org/cgi-bin/carddisp.pl?gene=ZFR
ZHX2	Zinc Fingers And Homeoboxes 2	KIAA0854, AFR1, RAF	http://www.genecards.org/cgi-bin/carddisp.pl?gene=ZHX2
ZNF236	Zinc Finger Protein 236	ZNF236A, ZNF236B	http://www.genecards.org/cgi-bin/carddisp.pl?gene=ZNF236
ZNF335	Zinc Finger Protein 335	MCPH10, NIF1, NIF2, NIF-1	http://www.genecards.org/cgi-bin/carddisp.pl?gene=ZNF335
ZNF384	Zinc Finger Protein 384	CAGH1A, ERDA2, NP, TNRC1, CAGH1, CIZ, NMP4	http://www.genecards.org/cgi-bin/carddisp.pl?gene=ZNF384
ZNF502	Zinc Finger Protein 502		http://www.genecards.org/cgi-bin/carddisp.pl?gene=ZNF502
ZNF516	Zinc Finger Protein 516	HsT287, KIAA0222	http://www.genecards.org/cgi-bin/carddisp.pl?gene=ZNF516
ZNF628	Zinc Finger Protein 628	ZEC, Zfp628	http://www.genecards.org/cgi-bin/carddisp.pl?gene=ZNF628
ZNF804B	Zinc Finger Protein 804B		http://www.genecards.org/cgi-bin/carddisp.pl?gene=ZNF804B

## Sheet: GO Molecular Function
Category	ID	Name	Source	p-value	q-value Bonferroni	q-value FDR B&H	q-value FDR B&Y	Hit Count in Query List	Hit Count in Genome	Hit in Query List
GO: Molecular Function	GO:0060228	phosphatidylcholine-sterol O-acyltransferase activator activity		5.872e-06	0.007193	0.007193	0.0553	4	6	APOA1,APOA4,APOC1,APOE

## Sheet: GO Biological Process
Category	ID	Name	Source	p-value	q-value Bonferroni	q-value FDR B&H	q-value FDR B&Y	Hit Count in Query List	Hit Count in Genome	Hit in Query List
GO: Biological Process	GO:0015914	phospholipid transport		2.263e-05	0.117	0.03787	0.3457	9	61	APOA1,APOA4,APOC1,APOC2,APOE,PITPNC1,KCNN4,ATP10A,ATP8B2
GO: Biological Process	GO:0033700	phospholipid efflux		2.569e-05	0.1328	0.03787	0.3457	5	15	APOA1,APOA4,APOC1,APOC2,APOE
GO: Biological Process	GO:0010873	positive regulation of cholesterol esterification		4.756e-05	0.2459	0.03787	0.3457	4	9	APOA1,APOA4,APOC1,APOE
GO: Biological Process	GO:0035637	multicellular organismal signaling		4.77e-05	0.2467	0.03787	0.3457	16	197	CHRNA7,CLCN1,FXYD1,FXYD3,CACNA2D4,SLC9A1,SRI,FXYD6,TMEM65,CACNA1A,OTOA,GRIK2,CACNG8,CACNG7,CACNG6,MYH14
GO: Biological Process	GO:0001841	neural tube formation		6.244e-05	0.3229	0.03787	0.3457	12	121	NOG,ARID1A,TWIST1,FZD6,CTHRC1,CC2D2A,SETD2,PHACTR4,KDM2A,SOX4,ST14,COBL
GO: Biological Process	GO:0001843	neural tube closure		6.39e-05	0.3304	0.03787	0.3457	11	103	NOG,ARID1A,TWIST1,FZD6,CTHRC1,CC2D2A,SETD2,PHACTR4,KDM2A,ST14,COBL
GO: Biological Process	GO:0060606	tube closure		6.984e-05	0.3611	0.03787	0.3457	11	104	NOG,ARID1A,TWIST1,FZD6,CTHRC1,CC2D2A,SETD2,PHACTR4,KDM2A,ST14,COBL
GO: Biological Process	GO:0001838	embryonic epithelial tube formation		7.728e-05	0.3996	0.03787	0.3457	13	143	NOG,ARID1A,TWIST1,FZD6,CTHRC1,CC2D2A,SETD2,PHACTR4,KDM2A,CTNNB1,SOX4,ST14,COBL
GO: Biological Process	GO:0072175	epithelial tube formation		8.302e-05	0.4293	0.03787	0.3457	13	144	NOG,ARID1A,TWIST1,FZD6,CTHRC1,CC2D2A,SETD2,PHACTR4,KDM2A,CTNNB1,SOX4,ST14,COBL
GO: Biological Process	GO:0014020	primary neural tube formation		9.861e-05	0.5099	0.03787	0.3457	11	108	NOG,ARID1A,TWIST1,FZD6,CTHRC1,CC2D2A,SETD2,PHACTR4,KDM2A,ST14,COBL
GO: Biological Process	GO:0033344	cholesterol efflux		0.0001137	0.5881	0.03787	0.3457	7	44	STX12,PON1,APOA1,APOA4,APOC1,APOC2,APOE
GO: Biological Process	GO:0019433	triglyceride catabolic process		0.0001142	0.5906	0.03787	0.3457	6	31	FABP5,APOA1,APOA4,APOC2,APOE,LIPE
GO: Biological Process	GO:0010872	regulation of cholesterol esterification		0.0001196	0.6185	0.03787	0.3457	4	11	APOA1,APOA4,APOC1,APOE
GO: Biological Process	GO:0034370	triglyceride-rich lipoprotein particle remodeling		0.0001196	0.6185	0.03787	0.3457	4	11	APOA1,APOA4,APOC2,APOE
GO: Biological Process	GO:0034372	very-low-density lipoprotein particle remodeling		0.0001196	0.6185	0.03787	0.3457	4	11	APOA1,APOA4,APOC2,APOE
GO: Biological Process	GO:0042127	regulation of cell proliferation		0.0001231	0.6366	0.03787	0.3457	67	1666	TBRG4,NOG,RPS9,STYK1,TTK,CHRNA7,CHRNB2,TWIST1,FZD7,AGO3,ATXN1,CTHRC1,AIF1,MMP9,ALOX15B,NCK2,CERS2,EPB41L4B,P3H3,SHC1,IFITM1,POU3F2,APOE,ARNT,CSNK2A1,CSNK2B,ZNF335,CLEC4G,FLCN,MTBP,MYOCD,CTNNB1,BTG4,IL6R,CX3CR1,SOX4,TNFRSF25,SPHK2,MTSS1,ESRP1,ITGA1,PTK2,BNC1,RASIP1,PTPN6,NOP2,SKAP2,DDR1,NR2E3,DRD2,PIM2,NR4A3,ECM1,FGFR1OP,LIN28A,IFNLR1,TNFRSF11B,CD4,HEY1,CD27,CD86,CD37,ING4,RNF41,TNFRSF1A,HAS2,RSPO1
GO: Biological Process	GO:0031348	negative regulation of defense response		0.0001369	0.7077	0.03787	0.3457	14	172	RPS19,ADAR,CHRNA7,NLRC5,CNR2,APCS,APOA1,APOE,CX3CR1,GBA,IL22RA2,SMPDL3B,DRD2,TNFRSF1A
GO: Biological Process	GO:0007268	chemical synaptic transmission		0.0001465	0.7575	0.03787	0.3457	34	678	EPHB2,MBP,GABARAP,COLQ,CHRNA7,CHRNB2,ATXN1,MMP9,CNR2,APOE,CPLX4,SLC6A3,PRKCG,CTNNB1,RIMS2,CX3CR1,CLSTN3,LRFN3,PTK2,LIN7B,SNAP91,SV2B,RAB3B,NPY,CA2,CACNA1A,CACNA1B,GPR1,DRD2,GRIK2,GRIK3,CACNG8,CACNG7,CPLX3
GO: Biological Process	GO:0099537	trans-synaptic signaling		0.0001465	0.7575	0.03787	0.3457	34	678	EPHB2,MBP,GABARAP,COLQ,CHRNA7,CHRNB2,ATXN1,MMP9,CNR2,APOE,CPLX4,SLC6A3,PRKCG,CTNNB1,RIMS2,CX3CR1,CLSTN3,LRFN3,PTK2,LIN7B,SNAP91,SV2B,RAB3B,NPY,CA2,CACNA1A,CACNA1B,GPR1,DRD2,GRIK2,GRIK3,CACNG8,CACNG7,CPLX3
GO: Biological Process	GO:0098916	anterograde trans-synaptic signaling		0.0001465	0.7575	0.03787	0.3457	34	678	EPHB2,MBP,GABARAP,COLQ,CHRNA7,CHRNB2,ATXN1,MMP9,CNR2,APOE,CPLX4,SLC6A3,PRKCG,CTNNB1,RIMS2,CX3CR1,CLSTN3,LRFN3,PTK2,LIN7B,SNAP91,SV2B,RAB3B,NPY,CA2,CACNA1A,CACNA1B,GPR1,DRD2,GRIK2,GRIK3,CACNG8,CACNG7,CPLX3
GO: Biological Process	GO:0099536	synaptic signaling		0.0001876	0.9698	0.04568	0.417	34	687	EPHB2,MBP,GABARAP,COLQ,CHRNA7,CHRNB2,ATXN1,MMP9,CNR2,APOE,CPLX4,SLC6A3,PRKCG,CTNNB1,RIMS2,CX3CR1,CLSTN3,LRFN3,PTK2,LIN7B,SNAP91,SV2B,RAB3B,NPY,CA2,CACNA1A,CACNA1B,GPR1,DRD2,GRIK2,GRIK3,CACNG8,CACNG7,CPLX3
GO: Biological Process	GO:0034377	plasma lipoprotein particle assembly		0.0001943	1	0.04568	0.417	5	22	APOA1,APOA4,APOC1,APOE,DGAT1
GO: Biological Process	GO:0045595	regulation of cell differentiation		0.0002166	1	0.04761	0.4346	67	1699	EPHB2,ASXL1,NOG,CYTH2,GDF6,MBP,JDP2,RPS19,TPBGL,CHRNB2,TWIST1,FZD7,TYROBP,MAPK12,ATXN1,FDPS,SLC9B2,CTHRC1,CMKLR1,PLXNA2,ALOX15B,CNTN1,CERS2,APCS,IFITM1,POU3F2,APOA1,APOE,ZHX2,CRABP2,ARNT,CSF3R,ZNF335,RBFOX1,GLIPR2,FLCN,MYOCD,CTNNB1,RIMS2,IL6R,CX3CR1,CYLD,HDAC9,SCRT1,DCSTAMP,SIGLEC15,PTK2,DDX6,PTPN6,COBL,ULK4,CA2,CACNA1A,DRD2,KRT84,NFKBID,SPAG9,ZBTB7B,LIN28A,HEY1,CD27,CD86,ARHGEF1,PAK3,RNF41,TNFRS…
GO: Biological Process	GO:0035148	tube formation		0.0002251	1	0.04761	0.4346	13	159	NOG,ARID1A,TWIST1,FZD6,CTHRC1,CC2D2A,SETD2,PHACTR4,KDM2A,CTNNB1,SOX4,ST14,COBL
GO: Biological Process	GO:0071827	plasma lipoprotein particle organization		0.0002713	1	0.04761	0.4346	6	36	APOA1,APOA4,APOC1,APOC2,APOE,DGAT1
GO: Biological Process	GO:0050728	negative regulation of inflammatory response		0.0002714	1	0.04761	0.4346	11	121	RPS19,CHRNA7,CNR2,APCS,APOA1,APOE,CX3CR1,GBA,IL22RA2,SMPDL3B,TNFRSF1A
GO: Biological Process	GO:0034368	protein-lipid complex remodeling		0.0003007	1	0.04761	0.4346	5	24	APOA1,APOA4,APOC1,APOC2,APOE
GO: Biological Process	GO:0034369	plasma lipoprotein particle remodeling		0.0003007	1	0.04761	0.4346	5	24	APOA1,APOA4,APOC1,APOC2,APOE
GO: Biological Process	GO:0034367	protein-containing complex remodeling		0.0003007	1	0.04761	0.4346	5	24	APOA1,APOA4,APOC1,APOC2,APOE
GO: Biological Process	GO:0035672	oligopeptide transmembrane transport		0.0003114	1	0.04761	0.4346	3	6	SLC26A6,CA2,CDH17
GO: Biological Process	GO:0034447	very-low-density lipoprotein particle clearance		0.0003114	1	0.04761	0.4346	3	6	APOC1,APOC2,APOE
GO: Biological Process	GO:0090500	endocardial cushion to mesenchymal transition		0.0003114	1	0.04761	0.4346	3	6	TWIST1,HEY1,HAS2
GO: Biological Process	GO:0046461	neutral lipid catabolic process		0.0003169	1	0.04761	0.4346	6	37	FABP5,APOA1,APOA4,APOC2,APOE,LIPE
GO: Biological Process	GO:0046464	acylglycerol catabolic process		0.0003169	1	0.04761	0.4346	6	37	FABP5,APOA1,APOA4,APOC2,APOE,LIPE
GO: Biological Process	GO:0046503	glycerolipid catabolic process		0.0003331	1	0.04761	0.4346	7	52	FABP5,APOA1,APOA4,APOC1,APOC2,APOE,LIPE
GO: Biological Process	GO:0097164	ammonium ion metabolic process		0.0003447	1	0.04761	0.4346	14	188	COLQ,CHRNB2,FABP5,PON1,APOA1,APOA4,APOC1,SLC6A3,CROT,SPHK2,MBOAT1,GBA,SMPDL3B,DRD2
GO: Biological Process	GO:0050804	modulation of chemical synaptic transmission		0.0003586	1	0.04761	0.4346	21	357	EPHB2,CHRNA7,CHRNB2,MMP9,CNR2,APOE,CPLX4,RIMS2,CX3CR1,CLSTN3,PTK2,RAB3B,CA2,CACNA1A,CACNA1B,DRD2,GRIK2,GRIK3,CACNG8,CACNG7,CPLX3
GO: Biological Process	GO:2000026	regulation of multicellular organismal development		0.0003588	1	0.04761	0.4346	72	1893	EPHB2,NOG,CYTH2,GDF6,MBP,TPBGL,COLQ,RXRB,CHRNA7,CHRNB2,TWIST1,FZD6,FZD7,TYROBP,ATXN1,FDPS,ANGPT4,SLC9B2,CTHRC1,MMP9,PLXNA2,ALOX15B,CNTN1,CERS2,COL4A2,ARHGEF19,APCS,POU3F2,APOA1,APOE,ZHX2,CRABP2,ARNT,CSF3R,ZNF335,RBFOX1,GLIPR2,RSPO2,FLCN,MYOCD,CTNNB1,RIMS2,CX3CR1,CYLD,HDAC9,CLSTN3,SCRT1,DCSTAMP,SIGLEC15,PTK2,DDX6,PTPN6,COBL,ULK4,CA2,CACNA1A,DRD2,KRT84,NFKBID,SPAG9,ZBTB7B,ECM1,LIN28A,TNFRSF11B,HEY1…
GO: Biological Process	GO:0065005	protein-lipid complex assembly		0.0003681	1	0.04761	0.4346	5	25	APOA1,APOA4,APOC1,APOE,DGAT1
GO: Biological Process	GO:0045923	positive regulation of fatty acid metabolic process		0.0003683	1	0.04761	0.4346	6	38	TWIST1,APOA1,APOA4,APOC2,DGAT1,NR4A3
GO: Biological Process	GO:0040011	locomotion		0.000389	1	0.04906	0.4478	67	1735	EPHB2,NOG,STYK1,RPS19,TPBGL,CHRNA7,TWIST1,ANGPT4,CTHRC1,AIF1,PIP5K1A,CCR8,CMKLR1,MMP9,PLXNA2,CNR2,ALOX15B,MRTFA,NCK2,CERS2,ANPEP,EPB41L4B,MBOAT7,FPR1,SHC1,APCS,IFITM1,POU3F2,APOA1,APOE,SETD2,SLC9A1,CSF3R,FEZ2,CSNK2B,PHACTR4,CLEC4G,GLIPR2,FLCN,CTNNB1,IL6R,CX3CR1,HDAC9,IL16,SCRT1,INPP5B,ITGA1,ST14,PTK2,PTPN6,PVR,ULK4,GAPDHS,DDR1,DRD2,ARHGEF5,NR4A3,SPAG9,ECM1,FGFR1OP,PTP4A3,CD4,CD86,CELF3,PAK3,RNF41…

## Sheet: GO Cellular Component
Category	ID	Name	Source	p-value	q-value Bonferroni	q-value FDR B&H	q-value FDR B&Y	Hit Count in Query List	Hit Count in Genome	Hit in Query List
GO: Cellular Component	GO:0042627	chylomicron		1.037e-05	0.006139	0.006139	0.04274	5	13	APOA1,APOA4,APOC1,APOC2,APOE
GO: Cellular Component	GO:0098797	plasma membrane protein complex		3.128e-05	0.01852	0.009242	0.06434	30	532	CHRNA7,CHRNB2,FXYD1,HSPA2,SHC1,ITGA10,ITGA8,SLC6A3,CACNA2D4,CTNNB1,SNTB1,IL6R,PSENEN,ITGA1,PTPN6,SNAP91,KCNJ5,KCNN4,GNB3,CACNA1A,CACNA1B,KRT8,GRIK2,IFNLR1,CACNG8,CACNG7,CACNG6,CD4,CD79A,GNB4
GO: Cellular Component	GO:0034364	high-density lipoprotein particle		5.548e-05	0.03285	0.009242	0.06434	6	28	PON1,APOA1,APOA4,APOC1,APOC2,APOE
GO: Cellular Component	GO:0005891	voltage-gated calcium channel complex		6.245e-05	0.03697	0.009242	0.06434	7	41	HSPA2,CACNA2D4,CACNA1A,CACNA1B,CACNG8,CACNG7,CACNG6
GO: Cellular Component	GO:0034385	triglyceride-rich plasma lipoprotein particle		0.0001081	0.06399	0.01066	0.07425	5	20	APOA1,APOA4,APOC1,APOC2,APOE
GO: Cellular Component	GO:0034361	very-low-density lipoprotein particle		0.0001081	0.06399	0.01066	0.07425	5	20	APOA1,APOA4,APOC1,APOC2,APOE
GO: Cellular Component	GO:0098796	membrane protein complex		0.0003575	0.2116	0.02886	0.2009	45	1059	TTYH1,CHRNA7,CHRNB2,STX12,CLCN1,TOMM40,FXYD1,FXYD3,HSPA2,DERL1,SHC1,ITGA10,ITGA8,CHCHD6,NECAP1,SLC6A3,CACNA2D4,SLC9A1,CTNNB1,EMC2,SNTB1,IL6R,SLC26A6,VAMP5,PSENEN,ITGA1,NDUFV1,RRAGC,PTPN6,SNAP91,KCNJ5,KCNN4,GNB3,STX17,CACNA1A,CACNA1B,KRT8,GRIK2,IFNLR1,CACNG8,CACNG7,CACNG6,CD4,CD79A,GNB4
GO: Cellular Component	GO:1990777	lipoprotein particle		0.0004388	0.2597	0.02886	0.2009	6	40	PON1,APOA1,APOA4,APOC1,APOC2,APOE
GO: Cellular Component	GO:0034358	plasma lipoprotein particle		0.0004388	0.2597	0.02886	0.2009	6	40	PON1,APOA1,APOA4,APOC1,APOC2,APOE
GO: Cellular Component	GO:0098589	membrane region		0.0005141	0.3044	0.03011	0.2096	51	1267	TTYH1,TMEM67,RUSC1,ADCY2,CHRNA7,CHRNB2,STX12,FZD6,GABARAPL1,AIF1,PIP5K1A,PLEC,FXYD1,CNTN1,ITGA8,SLC40A1,NECAP1,SLC6A3,SLC9A1,THEM4,NKD2,PRKCG,CTNNB1,RIMS2,IL6R,SLC26A6,CLSTN3,CYP4A11,LRFN3,ITGA1,ST14,PTK2,LIN7B,SNAP91,MALL,KCNN4,CA2,OTOA,DDR1,DRD2,RHBG,GRIK2,GRIK3,MAL2,CACNG8,LIPE,CD4,CD79A,TNFRSF1A,TRPV5,CDH17
GO: Cellular Component	GO:0032994	protein-lipid complex		0.0005749	0.3404	0.03011	0.2096	6	42	PON1,APOA1,APOA4,APOC1,APOC2,APOE
GO: Cellular Component	GO:0098802	plasma membrane receptor complex		0.0006102	0.3613	0.03011	0.2096	13	180	CHRNA7,CHRNB2,ITGA10,ITGA8,IL6R,ITGA1,PTPN6,GRIK2,IFNLR1,CACNG8,CACNG7,CD4,CD79A
GO: Cellular Component	GO:0034366	spherical high-density lipoprotein particle		0.0007892	0.4672	0.03594	0.2502	3	8	PON1,APOA1,APOC2
GO: Cellular Component	GO:0034704	calcium channel complex		0.0009588	0.5676	0.04054	0.2822	7	63	HSPA2,CACNA2D4,CACNA1A,CACNA1B,CACNG8,CACNG7,CACNG6
GO: Cellular Component	GO:0034702	ion channel complex		0.001093	0.647	0.04313	0.3003	17	291	TTYH1,CHRNA7,CHRNB2,CLCN1,FXYD1,FXYD3,HSPA2,CACNA2D4,SLC26A6,KCNJ5,KCNN4,CACNA1A,CACNA1B,GRIK2,CACNG8,CACNG7,CACNG6
GO: Cellular Component	GO:0016323	basolateral plasma membrane		0.001274	0.7543	0.04715	0.3282	15	244	PLEC,SLC40A1,SLC9A1,NKD2,CTNNB1,IL6R,SLC26A6,ST14,PTK2,LIN7B,KCNN4,CA2,DDR1,RHBG,CDH17

## Sheet: Phenotype
Category	ID	Name	Source	p-value	q-value Bonferroni	q-value FDR B&H	q-value FDR B&Y	Hit Count in Query List	Hit Count in Genome	Hit in Query List

## Sheet: Domain
Category	ID	Name	Source	p-value	q-value Bonferroni	q-value FDR B&H	q-value FDR B&Y	Hit Count in Query List	Hit Count in Genome	Hit in Query List
Domain	IPR000272	Ion-transport_regulator_FXYD	InterPro	2.656e-05	0.06231	0.01558	0.1299	4	8	FXYD1,FXYD3,FXYD6,FXYD5
Domain	PS01310	FXYD	PROSITE	2.656e-05	0.06231	0.01558	0.1299	4	8	FXYD1,FXYD3,FXYD6,FXYD5
Domain	PF02038	ATP1G1_PLM_MAT8	Pfam	2.656e-05	0.06231	0.01558	0.1299	4	8	FXYD1,FXYD3,FXYD6,FXYD5
Domain	PD005989	PD005989	ProDom	5.928e-06	0.01391	0.01391	0.1159	4	6	FXYD1,FXYD3,FXYD6,FXYD5

## Sheet: Pathway
Category	ID	Name	Source	p-value	q-value Bonferroni	q-value FDR B&H	q-value FDR B&Y	Hit Count in Query List	Hit Count in Genome	Hit in Query List
Pathway	PW:0000484	altered lipoprotein metabolic	Pathway Ontology	2.71e-07	0.0004464	0.0004464	0.003564	5	7	APOA1,APOA4,APOC1,APOC2,APOE
Pathway	PW:0000482	lipoprotein metabolic	Pathway Ontology	1.454e-05	0.02394	0.01197	0.09559	5	13	APOA1,APOA4,APOC1,APOC2,APOE

## Sheet: Pubmed
Category	ID	Name	Source	p-value	q-value Bonferroni	q-value FDR B&H	q-value FDR B&Y	Hit Count in Query List	Hit Count in Genome	Hit in Query List
Pubmed	16710414	The DNA sequence and biological annotation of human chromosome 1.	Pubmed	4.663e-17	2.749e-12	2.749e-12	3.178e-11	52	1031	EPHB2,CIART,TMEM222,ARID1A,TUFT1,S100A5,TSTD1,MFAP2,CGN,PIP5K1A,ADAMTSL4,NR0B2,MRTFA,THEMIS2,AMPD1,ZDHHC18,S100A16,C1orf43,APCS,PNRC2,PIGV,CRABP2,PPP1R8,SLC9A1,MTF1,DENND2C,CTPS1,IL6R,INPP5B,RNF115,RRAGC,DNALI1,DAP3,SETDB1,RHBDL2,SMPDL3B,MANEAL,TAF12,RAB3B,THRAP3,AKIRIN1,RHBG,MAN1C1,RIIAD1,ZBTB7B,LIN28A,EVA1B,MECR,ISG20L2,RPA2,RSPO1,EPB41
Pubmed	24952961	A high-resolution spatiotemporal atlas of gene expression of the developing mouse brain.	Pubmed	1.021e-15	6.02e-11	3.01e-11	3.48e-10	69	1835	EPHB2,TTYH1,NOG,GDF6,MBP,STYK1,JDP2,LMTK3,ADCY2,MEF2D,RXRB,CHRNA7,CHRNB2,TWIST1,FZD6,FZD7,ATXN1,ANGPT4,MMP9,USF2,NR0B2,PLXNA2,CNR2,CNTN1,NCK2,COL4A2,DEPTOR,POU2F2,APLP1,POU3F2,APOE,ZHX2,SLC40A1,SLC6A3,ARNT,NKD2,CSNK2A1,CSNK2B,RSPO2,CTNNB1,SNTB1,INVS,SOX4,IL16,PSENEN,RAPGEF5,FXYD6,CIC,PTK2,C4A,HSPB8,NPY,CA2,PDE11A,CACNA1A,CACNA1B,DDR1,NR2E3,DRD2,NR4A3,GRIK2,GRIK3,HIVEP3,CACNG7,HEY1,GNB4,TSHZ1,RSPO…
Pubmed	17081983	Global, in vivo, and site-specific phosphorylation dynamics in signaling networks.	Pubmed	9.183e-13	5.414e-08	1.805e-08	2.086e-07	57	1546	TRIO,MBP,CBX3,U2AF2,RCC1,CHD4,ARID1A,ADAR,MEF2D,STX12,MAPK12,PKLR,ANKIB1,PLEC,USF2,MRTFA,CERS2,SHC1,XRCC1,PNISR,IBTK,SETD2,CEP72,CSNK2B,MDC1,KDM2A,CTNNB1,EIF3H,CTPS1,RIMS2,SLC26A6,CYLD,HDAC9,KMT2B,GAPDH,RBM12B,LRFN3,CIC,PTK2,NCAPD2,NAV2,NOP2,SKAP2,THRAP3,KIF2C,CACNA1B,KRT8,NR2E3,GRWD1,OXR1,RBM4B,SPAG9,SNIP1,GAN,EBAG9,TRIM47,TPI1
Pubmed	21900206	A directed protein interaction network for investigating intracellular signal transduction.	Pubmed	1.86e-11	1.097e-06	2.741e-07	3.17e-06	45	1123	CADM4,CYTH2,RCC1,TTK,FXYD3,CNTN1,NCK2,COL4A2,DCAF13,MBOAT7,LENG1,SHC1,APCS,RABAC1,APLP1,PNRC2,APOA1,APOC1,ZBED8,CSNK2B,FLAD1,HACL1,KMT2B,GAPDH,CIC,PTK2,DNALI1,FBXL5,SETDB1,FKBP14,KIF2C,DDR1,KRT8,NAT14,PIM2,GRB10,ICE1,SPAG9,FGFR1OP,KIFC2,ARHGEF1,CELF3,WDR73,CLEC3B,TPI1
Pubmed	15226823	Genomic analysis of mouse retinal development.	Pubmed	8.522e-11	5.024e-06	1.005e-06	1.162e-05	40	961	TTYH1,CBX3,TMEM222,ADAR,RXRB,FABP5,FZD6,FZD7,LENG8,CLK2,PLEC,USF2,CPLX4,PNISR,CSNK2A1,ZFP41,HSPB6,GMEB1,CTNNB1,TNKS2,SOX4,SALL3,KMT2B,PTK2,KIF15,SV2B,TAX1BP1,NCAPD2,NAV3,THRAP3,NPY,CA2,DDR1,NR2E3,GRB10,PTP4A3,CITED4,CELF3,PAK3,EPB41
Pubmed	16713569	A protein-protein interaction network for human inherited ataxias and disorders of Purkinje cell degeneration.	Pubmed	4.231e-10	2.494e-05	4.157e-06	4.806e-05	30	608	MBP,CBX3,U2AF2,FZD7,LENG8,ATXN1,FDPS,HSPA2,NCK2,IFFO1,SYBU,XRCC1,ZHX2,SETD2,ZBTB32,ZBTB25,CSNK2B,RBFOX1,PRKCG,KMT2B,GAPDH,CIC,RRAGC,SETDB1,PIM2,RCVRN,ECM1,MYH14,CELF3,PBXIP1
Pubmed	15618518	Mouse brain organization revealed through direct genome-scale TF expression analysis.	Pubmed	7.237e-10	4.266e-05	6.095e-06	7.047e-05	54	1689	JDP2,CHD4,ARID1A,MEF2D,RXRB,TWIST1,ATXN1,TACC3,USF2,FHL3,NR0B2,PLXNA2,MRTFA,POU2F2,POU3F2,ZHX2,CREB5,IBTK,ARNT,ZBTB32,MTF1,ZBTB25,ZFP41,ZNF516,GMEB1,ZFR,MYOCD,EIF3H,SOX4,SPHK2,SCRT1,SALL3,KMT2B,ZNF236,RNF115,CIC,BNC1,DBF4,NAV3,TCEA3,NR2E3,ZNF628,NR4A3,ZBTB7B,LENG9,HIVEP3,SNIP1,CITED4,HEY1,ING4,RNF41,TSHZ1,TRIM47,TNXB
Pubmed	24457600	The central role of EED in the orchestration of polycomb group complexes.	Pubmed	1.343e-09	7.915e-05	9.894e-06	0.0001144	54	1719	TRIO,RPS9,CBX3,U2AF2,RPS19,RCC1,CHD4,ARID1A,ADAR,FABP5,LENG8,CLK2,CGN,EMG1,PLEC,COL4A2,CDC42BPG,DCAF13,DERL1,XRCC1,TBC1D31,CSNK2A1,CSNK2B,MDC1,ZNF516,GLIPR2,ZFR,KDM2A,CTNNB1,EIF3H,CTPS1,GAPDH,RBM12B,ESRP1,EIF3E,TEX10,ENY2,CDKAL1,DDX6,NCAPD2,NOP2,GNL1,THRAP3,KIF2C,RAD21,KRT8,RBM4B,ZBTB7B,LIN28A,MYH14,ISG20L2,PBXIP1,RPL18,TPI1
Pubmed	14574404	The DNA sequence and analysis of human chromosome 6.	Pubmed	2.888e-09	0.0001703	1.892e-05	0.0002187	29	621	USP45,TRMT11,ME1,RXRB,ATXN1,AIF1,FAM8A1,POU3F2,MSH5,PNISR,IBTK,CSNK2B,MDC1,RNF144B,SOX4,MBOAT1,FAXC,IL20RA,UHRF1BP1,FBXL4,IL22RA2,SNAP91,C4A,DDR1,MMS22L,FGFR1OP,PRDM13,NCOA7,TPBG
Pubmed	20936779	A human MAP kinase interactome.	Pubmed	5.418e-09	0.0003194	3.194e-05	0.0003693	25	486	CYTH2,CBX3,MEF2D,LENG8,ATXN1,PLEC,USF2,FHL3,PNISR,SLC9A1,KDM2A,HDAC9,CIC,PTK2,SETDB1,PTPN3,NAV3,NAV2,COBL,C4A,KRT5,KRT8,RBM4B,ARHGEF1,PAK3
Pubmed	15342556	Sequence comparison of human and mouse genes reveals a homologous block structure in the promoter regions.	Pubmed	9.061e-09	0.0005342	4.856e-05	0.0005615	41	1178	ZNF384,AICDA,RPS19,CHD4,TMEM222,TYROBP,SLC25A32,ATXN1,FDPS,TMEM245,CGN,EMG1,TOMM40,CMKLR1,PLEC,ALOX15B,XRCC1,CRABP2,GLIPR2,NDUFAF6,RIMS2,INVS,PRSS1,RAPGEF5,CYP21A2,TEX10,NDUFV1,COL21A1,TAX1BP1,GAPDHS,GPR1,UBE2C,HIBADH,SNIP1,HEY1,ATG12,CD37,ING4,RNF41,BCAM,TNXB
Pubmed	16189514	Towards a proteome-scale map of the human protein-protein interaction network.	Pubmed	1.079e-08	0.000636	4.98e-05	0.0005757	49	1573	CYTH2,U2AF2,RXRB,FZD7,LENG8,GABARAPL1,CLK2,TRPV6,FHL3,HSPA2,ADAMTSL4,NCK2,S100A16,IFFO1,SHC1,RABAC1,CRYBA2,SLC9A1,UBXN11,ZBTB32,MTF1,CEP72,ZBTB25,FLAD1,HACL1,EIF3H,EMC2,INVS,IL16,SRI,EIF3E,PITPNC1,GEM,NDUFV1,PTK2,RRAGC,LIN37,MALL,NAV2,HSPB8,PIM2,RBM4B,ZBTB7B,GTPBP10,SNIP1,ATG12,ISG20L2,PBXIP1,TRPV5
Pubmed	20412781	Resolution of cell fate decisions revealed by single-cell gene expression analysis from zygote to blastocyst.	Pubmed	1.177e-08	0.0006937	4.98e-05	0.0005757	31	744	ARID1A,MEF2D,RXRB,ATXN1,USF2,PLXNA2,MRTFA,POU2F2,IBTK,ARNT,MTF1,ZFP41,ZNF516,GMEB1,ZFR,CTNNB1,EIF3H,SOX4,SALL3,ZNF236,CIC,DBF4,TAF12,TCEA3,NR2E3,ZBTB7B,LENG9,HIVEP3,CITED4,HEY1,ING4
Pubmed	28671696	Spatiotemporal profile of postsynaptic interactomes integrates components of complex brain disorders.	Pubmed	1.183e-08	0.0006972	4.98e-05	0.0005757	35	916	TRIO,CYTH2,CBX3,CHD4,LMTK3,TMEM132B,AGO3,TACC3,CNTN1,ADAM22,OSBPL3,CSNK2A1,ZNF516,PRKCG,ZFR,CTNNB1,CYLD,TEX10,PTK2,CNTNAP5,KIF15,SNAP91,TAX1BP1,ANKRD28,NOP2,RAB3B,THRAP3,KIF2C,CACNA1A,TPPP,GRIK2,GRIK3,FAM171A1,INA,PAK3
Pubmed	9445485	Comparative sequence analysis of a gene-rich cluster at human chromosome 12p13 and its syntenic region in mouse chromosome 6.	Pubmed	3.015e-08	0.001777	0.0001185	0.00137	6	16	EMG1,P3H3,PTPN6,GNB3,CD4,TPI1
Pubmed	11162594	Apolipoprotein specificity for lipid efflux by the human ABCAI transporter.	Pubmed	4.012e-08	0.002365	0.0001478	0.001709	5	9	APOA1,APOA4,APOC1,APOC2,APOE
Pubmed	20430392	No interaction between alcohol consumption and HDL-related genes on HDL cholesterol levels.	Pubmed	9.888e-08	0.005829	0.0003429	0.003965	6	19	PON1,APOA1,APOA4,APOC1,APOC2,APOE
Pubmed	28611215	Genome-wide CRISPR screen identifies HNRNPL as a prostate cancer dependency regulating RNA splicing.	Pubmed	1.06e-07	0.006247	0.000347	0.004012	45	1489	TRIO,MBP,U2AF2,ARID1A,ATXN1,CLK2,ANKIB1,NLRC5,PIP5K1A,NCK2,CDC42BPG,DEPTOR,EPB41L4B,CHCHD6,MSH5,CCDC12,NSMCE2,ZHX2,THEM4,KDM2A,MPP6,IL6R,INVS,CMC1,SPIRE1,ZNF236,PTK2,SMPDL3B,PVR,COBL,STX17,THRAP3,DDR1,AKIRIN1,MAN1C1,GRB10,PARD3B,GRIK2,ATP10A,FGFR1OP,PLEKHG4B,HIVEP3,MYH14,PAK3,EPB41
Pubmed	6785912	Ly-15: a new murine lymphocyte alloantigenic locus.	Pubmed	1.298e-07	0.007655	0.0003827	0.004425	4	5	ME1,ANPEP,APOA1,CD4
Pubmed	6099394	Plasma lipoproteins: apolipoprotein structure and function.	Pubmed	1.298e-07	0.007655	0.0003827	0.004425	4	5	APOA1,APOA4,APOC2,APOE
Pubmed	24755620	Overrepresentation of glutamate signaling in Alzheimer's disease: network-based pathway enrichment using meta-analysis of genome-wide association studies.	Pubmed	1.44e-07	0.00849	0.0004043	0.004674	5	11	TOMM40,APOC1,APOE,PVR,BCAM
Pubmed	18660489	Multiple genetic variants along candidate pathways influence plasma high-density lipoprotein cholesterol concentrations.	Pubmed	1.727e-07	0.01018	0.0004627	0.00535	16	250	ME1,MEF2D,RXRB,FDPS,MMP9,NR0B2,SHC1,APOA1,APOA4,APOC2,APOE,CYP4A11,CYP11B2,SQLE,GNB3,LIPE
Pubmed	28378742	Fancd2 in vivo interaction network reveals a non-canonical role in mitochondrial function.	Pubmed	2.087e-07	0.01231	0.000535	0.006186	46	1577	RPS9,CBX3,U2AF2,RPS19,CHD4,ADAR,FABP5,PLEC,HSPA2,FAM160B2,MYOM3,APCS,CHCHD6,APOA1,APOE,NSMCE2,RBFOX1,MRPS15,CTNNB1,MPP6,CTPS1,PRSS1,GALNT1,GAPDH,CYP11B2,EIF3E,GEM,CDKAL1,DDX6,PTPN6,C4A,GAPDHS,NOP2,THRAP3,HSPB8,KRT8,MMS22L,ICE1,INA,MYH14,ARHGEF1,CD79A,ISG20L2,PBXIP1,RPL18,TPI1
Pubmed	27626380	High-throughput discovery of novel developmental phenotypes.	Pubmed	2.282e-07	0.01346	0.0005606	0.006482	47	1634	CHD4,ADAR,CHRNA7,CHRNB2,CGN,SLC9B2,AIF1,MMP9,AMPD1,EPB41L4B,MBOAT7,P3H3,FPR1,ITGA8,SLC40A1,SLC6A3,SETD2,ZBTB32,CSF3R,MTF1,HACL1,IL6R,RNF144B,CLSTN3,LRFN3,IL20RA,CDKAL1,RHBDL2,PLEKHA8,OTOA,CACNA1B,GPR1,KRT5,KRT8,ARHGEF5,UBE2C,TPPP,PARD3B,ECM1,HIBADH,FGFR1OP,CITED4,LIPE,GZMK,NCOA7,RSPO1,EPB41
Pubmed	23376485	Proteomic analysis of podocyte exosome-enriched fraction from normal human urine.	Pubmed	2.484e-07	0.01464	0.0005664	0.006548	49	1744	ASXL1,CADM4,RPS9,RPS19,STX12,FABP5,TRPV6,TOMM40,PLEC,MMP9,CNTN1,COL4A2,ANPEP,S100A16,PON1,APCS,APOA1,APOA4,APOC1,APOC2,APOE,CRABP2,SNED1,GLIPR2,PRSS1,CLSTN3,GAPDH,VAMP5,CYP4A11,SRI,GBA,ST14,TMBIM1,PVR,DNASE1L1,CA2,DDR1,DPYS,SPAG9,ECM1,SH3D21,FAM171A1,MAL2,MYH14,CD27,CLEC3B,BCAM,TNXB,TPI1
Pubmed	14718574	The human plasma proteome: a nonredundant list developed by combination of four separate sources.	Pubmed	2.498e-07	0.01473	0.0005664	0.006548	13	166	PON1,APCS,APOA1,APOA4,MSH5,APOC2,APOE,IL6R,PRSS1,IL16,C1R,CA2,CLEC3B
Pubmed	9074930	Large-scale sequencing in human chromosome 12p13: experimental and computational gene structure determination.	Pubmed	2.632e-07	0.01552	0.0005748	0.006645	6	22	EMG1,P3H3,PTPN6,GNB3,CD4,TPI1
Pubmed	20059953	A systems approach reveals that the myogenesis genome network is regulated by the transcriptional repressor RP58.	Pubmed	3.366e-07	0.01985	0.0007088	0.008194	42	1398	CBX3,JDP2,CHD4,MEF2D,RXRB,TWIST1,TRPV6,TACC3,USF2,NR0B2,MRTFA,CERS2,POU2F2,ZHX2,CREB5,ARNT,NKD2,MTF1,ZFP41,GMEB1,MYOCD,CTNNB1,INVS,SCRT1,SALL3,CIC,BNC1,MYCBP,TAF12,NOP2,THRAP3,PRSS35,NR2E3,NR4A3,ZBTB7B,LIN28A,SNIP1,CITED4,HEY1,ING4,TSHZ1,PBXIP1
Pubmed	27068509	Extracellular matrix remodelling in response to venous hypertension: proteomics of human varicose veins.	Pubmed	4.296e-07	0.02533	0.0008461	0.009782	12	146	CTHRC1,MMP9,COL4A2,APCS,APOA1,APOA4,APOE,ECM1,MFAP5,CLEC3B,BCAM,TNXB
Pubmed	19322201	Ubiquitin-mediated proteolysis of HuR by heat shock.	Pubmed	4.306e-07	0.02538	0.0008461	0.009782	47	1671	CBX3,JDP2,CHD4,ARID1A,ADAR,TUFT1,STX12,FZD6,SLC25A32,PAQR7,EPB41L4B,SETD2,ARNT,OSBPL3,CSNK2A1,MDC1,PHACTR4,GLIPR2,ZFR,KDM2A,DCBLD2,RNF144B,SOX4,GALNT1,RNF115,PTK2,CDKAL1,HCST,PROSER3,PVR,TMEM65,OSGIN2,TAF12,FKBP14,AKIRIN1,RBM4B,UBE2C,GRB10,HIBADH,MAL2,PTP4A3,RRNAD1,HEY1,CD27,PCSK7,RNF41,TNFRSF1A
Pubmed	21832049	Interactions of pathological hallmark proteins: tubulin polymerization promoting protein/p25, beta-amyloid, and alpha-synuclein.	Pubmed	4.746e-07	0.02798	0.0009026	0.01044	51	1891	ASXL1,AICDA,CIART,RPS9,RUSC1,RPS19,TTK,KLHL32,MEF2D,EMG1,PIP5K1A,HSPA2,FAM160B2,DEPTOR,DERL1,S100A16,LENG1,CHCHD6,APOA1,ZHX2,NECAP1,POLR3C,PPP1R8,CSNK2A1,PHACTR4,KCNK5,FLCN,PRKCG,CTNNB1,GAPDH,INPP5B,RNF115,ENY2,PTK2,DNALI1,UBE2S,ULK4,GAPDHS,SKAP2,KIF2C,RBM4B,ARHGEF5,TPPP,GRB10,CCNE2,ATG12,RNF41,CLEC3B,TRIM47,RPA2,TPI1
Pubmed	24154525	Conserved molecular signatures of neurogenesis in the hippocampal subgranular zone of rodents and primates.	Pubmed	6.969e-07	0.04109	0.001284	0.01484	18	348	CADM4,MBP,FABP5,PLXNA2,NXPH1,APOE,RNF144B,SOX4,CLSTN3,SCRT1,SQLE,FXYD6,TMEM65,RAB3B,NPY,CA2,PDE11A,MFAP5
Pubmed	21516116	Next-generation sequencing to generate interactome datasets.	Pubmed	8.842e-07	0.05213	0.00143	0.01653	36	1147	RUSC1,U2AF2,TMEM222,TUFT1,GABARAPL1,CLK2,FDPS,FHL3,FXYD3,ADAMTSL4,NCK2,DEPTOR,IFFO1,CREB5,UBXN11,ZBTB32,ZBTB25,ZBED8,CSNK2A1,MED18,IL16,PSENEN,EIF3E,FXYD6,RNF115,FBXL5,TAX1BP1,HSPB8,ARHGEF5,ZBTB7B,GTPBP10,MAL2,SNIP1,RNF41,TNXB,PBXIP1
Pubmed	10950925	The FXYD gene family of small ion transport regulators or channels: cDNA sequence, protein signature sequence, and expression.	Pubmed	8.906e-07	0.0525	0.00143	0.01653	4	7	FXYD1,FXYD3,FXYD6,FXYD5
Pubmed	16403837	FXYD proteins: new regulators of Na-K-ATPase.	Pubmed	8.906e-07	0.0525	0.00143	0.01653	4	7	FXYD1,FXYD3,FXYD6,FXYD5
Pubmed	4345202	Interchange of apolipoproteins between chylomicrons and high density lipoproteins during alimentary lipemia in man.	Pubmed	8.906e-07	0.0525	0.00143	0.01653	4	7	APOA1,APOA4,APOC2,APOE
Pubmed	16763159	Consistent effects of genes involved in reverse cholesterol transport on plasma lipid and apolipoprotein levels in CARDIA participants.	Pubmed	8.974e-07	0.0529	0.00143	0.01653	5	15	APOA1,APOA4,APOC1,APOC2,APOE
Pubmed	15174051	An investigation into the human serum "interactome".	Pubmed	1.305e-06	0.07695	0.002025	0.02341	12	162	DERL1,APOA1,APOA4,APOC1,APOC2,APOE,CROT,PRSS1,C4A,THRAP3,KRT5,CD79A
Pubmed	24711643	Identifying biological pathways that underlie primordial short stature using network analysis.	Pubmed	1.45e-06	0.08546	0.002191	0.02533	33	1024	RPS9,CBX3,U2AF2,RPS19,RCC1,CHD4,ADAR,MFAP2,CGN,EMG1,PLEC,XRCC1,CSNK2A1,CSNK2B,MDC1,ZFR,CTNNB1,EMC2,GAPDH,RBM12B,TEX10,DDX6,SMPDL3B,NOP2,THRAP3,KRT5,RBM4B,KRT84,INA,MYH14,CKAP2L,RPL18,TPI1
Pubmed	17516841	Mid-region parathyroid hormone-related protein (PTHrP) and gene expression of MDA-MB231 breast cancer cells.	Pubmed	1.763e-06	0.1039	0.002421	0.02799	4	8	FZD6,EIF3E,OXR1,EBAG9
Pubmed	14706451	A physical map of the genomic region on mouse chromosome 3 containing the hindshaker (hsh) mutation.	Pubmed	1.811e-06	0.1067	0.002421	0.02799	5	17	MEF2D,CGN,PKLR,GBA,DAP3
Pubmed	20080650	Inherited genetic variant predisposes to aggressive but not indolent prostate cancer.	Pubmed	1.921e-06	0.1133	0.002421	0.02799	6	30	COL4A2,NXPH1,ZHX2,CREB5,MTSS1,RHBDL2
Pubmed	22710912	TOMM40, APOE, and APOC1 in primary progressive aphasia and frontotemporal dementia.	Pubmed	2.095e-06	0.1235	0.002421	0.02799	3	3	TOMM40,APOC1,APOE
Pubmed	21165564	Sox4 stimulates ß-catenin activity through induction of CK2.	Pubmed	2.095e-06	0.1235	0.002421	0.02799	3	3	CSNK2A1,CTNNB1,SOX4
Pubmed	26410457	FXYD1 negatively regulates Na(+)/K(+)-ATPase activity in lung alveolar epithelial cells.	Pubmed	2.095e-06	0.1235	0.002421	0.02799	3	3	FXYD1,FXYD3,FXYD5
Pubmed	26657933	Association of common variants in TOMM40/APOE/APOC1 region with human longevity in a Chinese population.	Pubmed	2.095e-06	0.1235	0.002421	0.02799	3	3	TOMM40,APOC1,APOE
Pubmed	22054870	A genome-wide scan for common variants affecting the rate of age-related cognitive decline.	Pubmed	2.095e-06	0.1235	0.002421	0.02799	3	3	TOMM40,APOC1,APOE
Pubmed	29371683	DNA methylation of TOMM40-APOE-APOC2 in Alzheimer's disease.	Pubmed	2.095e-06	0.1235	0.002421	0.02799	3	3	TOMM40,APOC2,APOE
Pubmed	15900219	Paraoxonase-1 promoter polymorphism C--107T and serum apolipoprotein AI interact to modulate serum paraoxonase-1 status.	Pubmed	2.095e-06	0.1235	0.002421	0.02799	3	3	PON1,APOA1,APOC1
Pubmed	10632725	Conserved protein motifs and structural organization of a fish gene homologous to mammalian apolipoprotein E.	Pubmed	2.095e-06	0.1235	0.002421	0.02799	3	3	APOA1,APOA4,APOE
Pubmed	27707806	Replication of Genome-Wide Association Study Findings of Longevity in White, African American, and Hispanic Women: The Women's Health Initiative.	Pubmed	2.095e-06	0.1235	0.002421	0.02799	3	3	TOMM40,APOC1,APOE
Pubmed	17145500	PlexinA1 signaling directs the segregation of proprioceptive sensory axons in the developing spinal cord.	Pubmed	2.182e-06	0.1286	0.002463	0.02848	10	114	EPHB2,CADM4,MBP,FZD6,FZD7,PLXNA2,ADAM22,PRKCG,DCBLD2,LRFN3
Pubmed	25609649	Proteomic analyses reveal distinct chromatin-associated and soluble transcription factor complexes.	Pubmed	2.214e-06	0.1305	0.002463	0.02848	29	852	ASXL1,JDP2,RCC1,CHD4,ADAR,MEF2D,RXRB,TWIST1,TOMM40,USF2,POU2F2,XRCC1,ARNT,ZFR,KDM2A,CTNNB1,TEX10,UHRF1BP1,CIC,NDUFV1,LIN37,NCAPD2,ANKRD28,THRAP3,KIF2C,SPAG9,LENG9,TSHZ1,RPA2
Pubmed	18636124	Polymorphisms in the estrogen receptor 1 and vitamin C and matrix metalloproteinase gene families are associated with susceptibility to lymphoma.	Pubmed	2.328e-06	0.1372	0.002541	0.02938	11	142	MMP9,APOA4,XRCC1,APOE,SLC6A3,CX3CR1,CYP11B2,CYP21A2,C4A,NPY,DRD2
Pubmed	16169070	A human protein-protein interaction network: a resource for annotating the proteome.	Pubmed	2.709e-06	0.1597	0.002903	0.03357	45	1678	TBRG4,TRIO,GABARAP,U2AF2,LMTK3,TMEM222,CHN2,EMG1,PIP5K1A,FXYD3,NCK2,LENG1,RABAC1,APLP1,PNRC2,APOA1,SYBU,SLC40A1,PPP1R8,CSNK2A1,GAPDH,MTSS1,SRI,EIF3E,FXYD6,ENY2,DNALI1,COPS7A,SETDB1,PTPN6,KIF15,MYCBP,TAX1BP1,CA2,DDR1,KRT8,MMS22L,PIM2,RBM4B,UBE2C,KIFC2,LIPE,CELF3,RPA2,TPI1
Pubmed	15778465	Targeted proteomic analysis of 14-3-3 sigma, a p53 effector commonly silenced in cancer.	Pubmed	3.114e-06	0.1836	0.003249	0.03757	9	93	CYTH2,CGN,OSBPL3,CSNK2A1,SPIRE1,PTPN3,ARHGEF5,PARD3B,GAN
Pubmed	11170751	A cluster of three novel Ca2+ channel gamma subunit genes on chromosome 19q13.4: evolution and expression profile of the gamma subunit gene family.	Pubmed	3.142e-06	0.1852	0.003249	0.03757	4	9	PRKCG,CACNG8,CACNG7,CACNG6
Pubmed	20237496	New genetic associations detected in a host response study to hepatitis B vaccine.	Pubmed	3.5e-06	0.2063	0.003557	0.04113	28	825	AICDA,AIF1,CCR8,CMKLR1,NCK2,FPR1,APCS,NECAP1,CLEC4G,GLIPR2,TNKS2,IL6R,CX3CR1,SOX4,SPHK2,IL16,IL20RA,RNF115,IL22RA2,HSPB8,FGFR1OP,IFNLR1,TNFRSF11B,CD4,CD27,CD86,CD79A,TNFRSF1A
Pubmed	20714348	Common inherited variation in mitochondrial genes is not enriched for associations with type 2 diabetes or related glycemic traits.	Pubmed	4.395e-06	0.2591	0.004392	0.05077	5	20	APOA1,APOA4,APOC1,APOC2,APOE
Pubmed	14656967	Analysis of the gene-dense major histocompatibility complex class III region and its comparison to mouse.	Pubmed	4.911e-06	0.2895	0.004808	0.05559	7	53	AIF1,MSH5,CSNK2B,CYP21A2,C4A,PRRT1,TNXB
Pubmed	24151333	Wnt/Rspondin/?-catenin signals control axonal sorting and lineage progression in Schwann cell development.	Pubmed	4.975e-06	0.2933	0.004808	0.05559	6	35	MBP,FZD6,FZD7,RSPO2,CTNNB1,RSPO1
Pubmed	1638085	Characterization of murine carcinoembryonic antigen gene family members.	Pubmed	5.183e-06	0.3056	0.004886	0.05649	4	10	POU2F2,XRCC1,APOE,PRKCG
Pubmed	26673895	A deep proteomics perspective on CRM1-mediated nuclear export and nucleocytoplasmic partitioning.	Pubmed	5.222e-06	0.3078	0.004886	0.05649	32	1038	RPS9,MEF2D,GABARAPL1,AGO3,MRTFA,DEPTOR,SHC1,MSH5,PNISR,SETD2,CSNK2A1,CSNK2B,CTNNB1,EIF3H,WDTC1,CYLD,EIF3E,DDX6,FBXL4,SETDB1,LIN37,DBF4,TAF12,THRAP3,HSPB8,GRWD1,GRB10,FGFR1OP,ARHGEF1,ATG12,GNB4,RPL18
Pubmed	11125038	Database resources of the National Center for Biotechnology Information.	Pubmed	5.365e-06	0.3163	0.004942	0.05713	43	1614	FAM110D,STYK1,CHN2,CC2D2A,TOMM40,S100A16,TMEM158,LENG1,RDH14,SYBU,NSMCE2,PNISR,NECAP1,ZFP41,PHACTR4,RSPO2,FLCN,NDUFAF6,RNF144B,LRFN3,FAXC,SPIRE1,PPP1R14D,DNALI1,FBXL4,RASIP1,SV2B,TAX1BP1,CDC42EP5,COBL,UBE2S,ENDOU,GAPDHS,PRSS35,OTOA,KRT5,ARHGEF5,AZI2,HIBADH,KIFC2,FAM171A1,ISG20L2,TRIM47
Pubmed	22842622	Use of (alternative) coreceptors for HIV entry.	Pubmed	5.708e-06	0.3365	0.005177	0.05985	5	21	CCR8,CMKLR1,CLEC4G,CX3CR1,GPR1
Pubmed	26460568	Kelch Domain of Gigaxonin Interacts with Intermediate Filament Proteins Affected in Giant Axonal Neuropathy.	Pubmed	5.807e-06	0.3423	0.005187	0.05997	12	187	RPS9,PLEC,HSPA2,PARP14,SETD2,CEP72,THRAP3,KRT84,INA,MYH14,ARHGEF1,GAN
Pubmed	11544199	Construction of long-transcript enriched cDNA libraries from submicrogram amounts of total RNAs by a universal PCR amplification method.	Pubmed	6.111e-06	0.3602	0.005357	0.06193	30	947	USP45,DHDDS,KLHL32,MFAP2,PLEC,USF2,MFSD1,MRTFA,FAM160B2,CERS2,EPB41L4B,MSH5,TBC1D31,FEZ2,OSBPL3,BTG4,CYLD,SALL3,GALNT1,RAPGEF5,ESRP1,SPIRE1,UHRF1BP1,COPS7A,RHBDL2,KIF2C,GRWD1,KRT84,KIFC2,ARHGEF1
Pubmed	20587610	Examination of genetic polymorphisms in newborns for signatures of sex-specific prenatal selection.	Pubmed	6.179e-06	0.3643	0.005357	0.06193	9	101	RXRB,AIF1,MSH5,SLC40A1,MDC1,CYP21A2,CDKAL1,DDR1,TNXB
Pubmed	24194600	The International Mouse Phenotyping Consortium Web Portal, a unified point of access for knockout mice and related phenotyping data.	Pubmed	6.716e-06	0.3959	0.005616	0.06493	32	1051	CHD4,ADAR,CHRNB2,CGN,SLC9B2,PAQR7,AMPD1,EPB41L4B,MBOAT7,P3H3,FPR1,ITGA8,SLC40A1,SLC6A3,ZBTB32,MTF1,HACL1,IL6R,CLSTN3,IL20RA,ST14,RHBDL2,DBF4,OTOA,GPR1,KRT5,TPPP,PARD3B,ECM1,CITED4,NCOA7,RSPO1
Pubmed	19204726	Transcriptomic and genetic studies identify IL-33 as a candidate gene for Alzheimer's disease.	Pubmed	7.14e-06	0.4209	0.005616	0.06493	8	78	ANGPT4,AIF1,P3H3,PTPN6,KRT8,AQP10,RRNAD1,TNXB
Pubmed	21943158	Genetic variants in LPL, OASL and TOMM40/APOE-C1-C2-C4 genes are associated with multiple cardiovascular-related traits.	Pubmed	7.31e-06	0.4309	0.005616	0.06493	5	22	TOMM40,APOC1,APOC2,APOE,PCSK7
Pubmed	22990118	Charting the landscape of tandem BRCT domain-mediated protein interactions.	Pubmed	7.377e-06	0.4349	0.005616	0.06493	24	671	CBX3,U2AF2,ARID1A,FHL3,DCAF13,CSNK2A1,CSNK2B,MDC1,FLCN,EIF3H,GAPDH,VAMP5,DBF4,NCAPD2,ANKRD28,NOP2,THRAP3,KIF2C,OXR1,SPAG9,HIBADH,FGFR1OP,MYH14,TPI1
Pubmed	2383242	Genetic analysis of nonhistone chromosomal protein inheritance in recombinant inbred mouse strains using two-dimensional electrophoresis.	Pubmed	8.062e-06	0.4753	0.005616	0.06493	4	11	ME1,ANPEP,APOA1,CA2
Pubmed	19598115	On the role of Eph signalling in thymus histogenesis; EphB2/B3 and the organizing of the thymic epithelial network.	Pubmed	8.193e-06	0.483	0.005616	0.06493	3	4	EPHB2,KRT5,KRT8
Pubmed	16459141	Combined effects of apoE-CI-CII cluster and LDL-R gene polymorphisms on chromosome 19 and coronary artery disease risk.	Pubmed	8.193e-06	0.483	0.005616	0.06493	3	4	APOC1,APOC2,APOE
Pubmed	21127204	Cardiac L-type calcium channel (Cav1.2) associates with gamma subunits.	Pubmed	8.193e-06	0.483	0.005616	0.06493	3	4	CACNG8,CACNG7,CACNG6
Pubmed	9185604	Phosphorylation of both phosphoacceptor sites in the HIV-1 Vpu cytoplasmic domain is essential for Vpu-mediated ER degradation of CD4.	Pubmed	8.193e-06	0.483	0.005616	0.06493	3	4	CSNK2A1,CSNK2B,CD4
Pubmed	8659106	The human immunodeficiency virus type 1 Vpu protein tethered to the CD4 extracellular domain is localized to the plasma membrane and is biologically active in the secretory pathway of mammalian cells: implications for the mechanisms of Vpu function.	Pubmed	8.193e-06	0.483	0.005616	0.06493	3	4	CSNK2A1,CSNK2B,CD4
Pubmed	7560076	Genetic factors in lipoprotein metabolism. Analysis of a genetic cross between inbred mouse strains NZB/BINJ and SM/J using a complete linkage map approach.	Pubmed	8.193e-06	0.483	0.005616	0.06493	3	4	APOC2,APOE,LIPE
Pubmed	10520737	Sequencing of 42kb of the APO E-C2 gene cluster reveals a new gene: PEREC1.	Pubmed	8.193e-06	0.483	0.005616	0.06493	3	4	TOMM40,APOC1,APOE
Pubmed	16968945	Functionally defective high-density lipoprotein: a new therapeutic target at the crossroads of dyslipidemia, inflammation, and atherosclerosis.	Pubmed	8.193e-06	0.483	0.005616	0.06493	3	4	APOA1,APOC2,APOE
Pubmed	12113906	Relationship among (1)H-magnetic resonance spectroscopy, brain volumetry and genetic polymorphisms in humans with memory impairment.	Pubmed	8.193e-06	0.483	0.005616	0.06493	3	4	APOC1,APOE,DRD2
Pubmed	19014618	Apolipoprotein gene polymorphisms and plasma levels in healthy Tunisians and patients with coronary artery disease.	Pubmed	8.193e-06	0.483	0.005616	0.06493	3	4	APOC1,APOC2,APOE
Pubmed	12220441	Apolipoprotein molecular variation in Moroccan Berbers: pentanucleotide (TTTTA)n repeat in the LPA gene and APOE-C1-C2 gene cluster.	Pubmed	8.193e-06	0.483	0.005616	0.06493	3	4	APOC1,APOC2,APOE
Pubmed	20498921	APOE/C1/C4/C2 gene cluster genotypes, haplotypes and lipid levels in prospective coronary heart disease risk among UK healthy men.	Pubmed	8.193e-06	0.483	0.005616	0.06493	3	4	APOC1,APOC2,APOE
Pubmed	8139011	Differential activities of the human immunodeficiency virus type 1-encoded Vpu protein are regulated by phosphorylation and occur in different cellular compartments.	Pubmed	8.193e-06	0.483	0.005616	0.06493	3	4	CSNK2A1,CSNK2B,CD4
Pubmed	27480124	Decreased expression levels of Ifi genes is associated to the increased resistance to spontaneous arthritis disease in mice deficiency of IL-1RA.	Pubmed	9.882e-06	0.5826	0.006644	0.07681	11	165	ASXL1,ME1,MSH5,CLEC4G,GLIPR2,MED18,KIF2C,MECR,UBE3D,RPA2,EPB41
Pubmed	8827514	Genetic regulation of cholesterol homeostasis: chromosomal organization of candidate genes.	Pubmed	9.917e-06	0.5846	0.006644	0.07681	9	107	RXRB,FDPS,PON1,APOA1,APOE,ARNT,HSPB8,DRD2,LIPE
Pubmed	19453261	High-density association study of 383 candidate genes for volumetric BMD at the femoral neck and lumbar spine among older men.	Pubmed	1.078e-05	0.6357	0.007143	0.08258	17	383	NOG,MEF2D,RXRB,TWIST1,FZD6,FZD7,MMP9,CSF3R,CTNNB1,IL6R,SOX4,CYP21A2,ZBTB7B,TNFRSF11B,HEY1,TNFRSF1A,TRPV5
Pubmed	25131634	Expression profile analysis of vulnerable CA1 pyramidal neurons in young-Middle-Aged Ts65Dn mice.	Pubmed	1.136e-05	0.6698	0.00736	0.0851	8	83	MBP,MAPK12,APCS,CTNNB1,GNB3,NR4A3,ATG12,GNB4
Pubmed	21491433	Cell-type-specific consequences of Reelin deficiency in the mouse neocortex, hippocampus, and amygdala.	Pubmed	1.136e-05	0.6698	0.00736	0.0851	8	83	CHRNA7,RSPO2,DCBLD2,C1R,PDE11A,CPLX3,TSHZ1,RSPO1
Pubmed	12880961	Neuroblastoma oligo-capping cDNA project: toward the understanding of the genesis and biology of neuroblastoma.	Pubmed	1.197e-05	0.7057	0.007589	0.08774	4	12	NXPH1,TEX10,OXR1,NCOA7
Pubmed	19389359	Early onset of craniosynostosis in an Apert mouse model reveals critical features of this pathology.	Pubmed	1.197e-05	0.7057	0.007589	0.08774	4	12	NOG,GDF6,TWIST1,CTNNB1
Pubmed	19367581	Identification of neuroglycan C and interacting partners as potential susceptibility genes for schizophrenia in a Southern Chinese population.	Pubmed	1.419e-05	0.8367	0.008867	0.1025	7	62	CHRNA7,PLXNA2,APOE,SETD2,SLC26A6,NBEAL2,DRD2
Pubmed	20802378	A multiplex MALDI-TOF MS approach facilitates genotyping of DNA from formalin-fixed paraffin-embedded tumour specimens.	Pubmed	1.429e-05	0.8424	0.008867	0.1025	5	25	MMP9,PON1,XRCC1,IL16,CD86
Pubmed	12893283	Identification and characterization of a new pair of immunoglobulin-like receptors LMIR1 and 2 derived from murine bone marrow-derived mast cells.	Pubmed	1.712e-05	1	0.01051	0.1215	4	13	TYROBP,NR0B2,HCST,PTPN6
Pubmed	6929943	A serum protein polymorphism determinant on chromosome 9 of Mus musculus.	Pubmed	2.029e-05	1	0.01058	0.1224	3	5	ME1,ANPEP,APOA1
Pubmed	18802019	Common SNPs in HMGCR in micronesians and whites associated with LDL-cholesterol levels affect alternative splicing of exon13.	Pubmed	2.029e-05	1	0.01058	0.1224	3	5	APOC1,APOC2,APOE
Pubmed	1917954	Mechanisms of inhibition by apolipoprotein C of apolipoprotein E-dependent cellular metabolism of human triglyceride-rich lipoproteins through the low density lipoprotein receptor pathway.	Pubmed	2.029e-05	1	0.01058	0.1224	3	5	APOC1,APOC2,APOE
Pubmed	9186920	ApoA-I knockout mice: characterization of HDL metabolism in homozygotes and identification of a post-RNA mechanism of apoA-I up-regulation in heterozygotes.	Pubmed	2.029e-05	1	0.01058	0.1224	3	5	APOA1,APOA4,APOE
Pubmed	7798939	Nerve regeneration and cholesterol reutilization occur in the absence of apolipoproteins E and A-I in mice.	Pubmed	2.029e-05	1	0.01058	0.1224	3	5	APOA1,APOA4,APOE
Pubmed	1477475	The AXB and BXA set of recombinant inbred mouse strains.	Pubmed	2.029e-05	1	0.01058	0.1224	3	5	ME1,APOA1,CA2
Pubmed	12432063	Protein kinase CKII regulates the interaction of beta-catenin with alpha-catenin and its protein stability.	Pubmed	2.029e-05	1	0.01058	0.1224	3	5	CSNK2A1,CSNK2B,CTNNB1
Pubmed	11972058	Association and regulation of casein kinase 2 activity by adenomatous polyposis coli protein.	Pubmed	2.029e-05	1	0.01058	0.1224	3	5	CSNK2A1,CSNK2B,CTNNB1
Pubmed	9300780	Adenoviral vector-mediated overexpression of serum amyloid A in apoA-I-deficient mice.	Pubmed	2.029e-05	1	0.01058	0.1224	3	5	APOA1,APOA4,APOE
Pubmed	1427910	Assignment of a novel protein tyrosine phosphatase gene (Hcph) to mouse chromosome 6.	Pubmed	2.029e-05	1	0.01058	0.1224	3	5	PTPN6,CD4,TNFRSF1A
Pubmed	12782148	Effects of plasma apolipoproteins on lipoprotein lipase-mediated lipolysis of small and large lipid emulsions.	Pubmed	2.029e-05	1	0.01058	0.1224	3	5	APOA1,APOC2,APOE
Pubmed	7295297	Polymorphism of kidney pyruvate kinase in the mouse is determined by a gene, Pk-3, on chromosome 9.	Pubmed	2.029e-05	1	0.01058	0.1224	3	5	ME1,PKLR,APOA1
Pubmed	23132909	ApoA-IV promotes the biogenesis of apoA-IV-containing HDL particles with the participation of ABCA1 and LCAT.	Pubmed	2.029e-05	1	0.01058	0.1224	3	5	APOA1,APOA4,APOE
Pubmed	12032151	Regulated expression of the apolipoprotein E/C-I/C-IV/C-II gene cluster in murine and human macrophages. A critical role for nuclear liver X receptors alpha and beta.	Pubmed	2.029e-05	1	0.01058	0.1224	3	5	APOC1,APOC2,APOE
Pubmed	20100581	Whole genome association study of brain-wide imaging phenotypes for identifying quantitative trait loci in MCI and AD: A study of the ADNI cohort.	Pubmed	2.029e-05	1	0.01058	0.1224	3	5	TOMM40,NXPH1,APOE
Pubmed	11773012	Androgen-dependent hereditary mouse keratoconus: linkage to an MHC region.	Pubmed	2.029e-05	1	0.01058	0.1224	3	5	CYP21A2,C4A,TNXB
Pubmed	6735174	Conserved linkage within a 4-cM region of mouse chromosome 9 and human chromosome 11.	Pubmed	2.029e-05	1	0.01058	0.1224	3	5	ME1,ANPEP,APOA1
Pubmed	19946888	Defining the membrane proteome of NK cells.	Pubmed	2.192e-05	1	0.01133	0.131	33	1168	RPS9,RPS19,CHD4,ADAR,TTK,AGO3,HSPA2,CERS2,DERL1,MBOAT7,IFITM1,RABAC1,APOE,PARP14,OSBPL3,EIF3H,CTPS1,GALNT1,GAPDH,EIF3E,ITGA1,CDKAL1,DDX6,KIF15,NBEAL2,NCAPD2,KIF2C,RAD21,KRT5,MYH14,CD37,M6PR,RPL18
Pubmed	16498401	In vivo role of the HNF4alpha AF-1 activation domain revealed by exon swapping.	Pubmed	2.241e-05	1	0.01149	0.1328	6	45	PKLR,APOA1,APOA4,APOC2,APOE,KRT8
Pubmed	10941842	Extensive gene duplications and a large inversion characterize the human leukocyte receptor cluster.	Pubmed	2.372e-05	1	0.01175	0.1359	4	14	LENG8,MBOAT7,LENG1,LENG9
Pubmed	23419831	APOE and BCHE as modulators of cerebral amyloid deposition: a florbetapir PET genome-wide association study.	Pubmed	2.372e-05	1	0.01175	0.1359	4	14	TOMM40,APOC1,APOE,ITGA1
Pubmed	8105016	Chromosomal localization of lipolytic enzymes in the mouse: pancreatic lipase, colipase, hormone-sensitive lipase, hepatic lipase, and carboxyl ester lipase.	Pubmed	2.372e-05	1	0.01175	0.1359	4	14	APOA1,APOC2,APOE,LIPE
Pubmed	25064007	A genome-wide association study identifies susceptibility loci for ossification of the posterior longitudinal ligament of the spine.	Pubmed	2.372e-05	1	0.01175	0.1359	4	14	RSPO2,EIF3H,EMC2,EIF3E
Pubmed	17353931	Large-scale mapping of human protein-protein interactions by mass spectrometry.	Pubmed	2.589e-05	1	0.01272	0.147	35	1284	TBRG4,RPS9,GABARAP,U2AF2,RPS19,FABP5,CLK2,CGN,USF2,CERS2,XRCC1,PPP1R8,IBTK,OSBPL3,CSNK2A1,CSNK2B,CTNNB1,EIF3H,CTPS1,GAPDH,EIF3E,SPIRE1,PTK2,DDX6,DAP3,PTPN3,GAPDHS,THRAP3,KRT8,MMS22L,SPAG9,PTP4A3,ATG12,CLEC3B,EPB41
Pubmed	15231748	Functional proteomics mapping of a human signaling pathway.	Pubmed	2.998e-05	1	0.01461	0.1689	21	591	U2AF2,PLEC,COL4A2,PPP1R8,ARNT,UBXN11,GMEB1,KDM2A,CTNNB1,TNKS2,INVS,KMT2B,SRI,EIF3E,TEX10,SETDB1,TAX1BP1,ANKRD28,MAN1C1,SNIP1,HEY1
Pubmed	14746139	Molecular variation at functional genes and the history of human populations--data on candidate genes for cardiovascular risk in the Mediterranean.	Pubmed	3.202e-05	1	0.01547	0.1789	4	15	APOA1,APOC1,APOC2,APOE
Pubmed	17403666	Isolation and characterization of proteins associated with histone H3 tails in vivo.	Pubmed	3.636e-05	1	0.0168	0.1943	5	30	CBX3,CHD4,HDAC9,THRAP3,RNF41
Pubmed	28538179	HAND2 Target Gene Regulatory Networks Control Atrioventricular Canal and Cardiac Valve Development.	Pubmed	3.636e-05	1	0.0168	0.1943	5	30	TWIST1,GLIPR2,MYOCD,HEY1,HAS2
Pubmed	23602568	The protein interaction landscape of the human CMGC kinase group.	Pubmed	3.74e-05	1	0.0168	0.1943	23	694	ASXL1,GABARAP,U2AF2,MAPK12,GABARAPL1,CLK2,NCK2,SETD2,CSNK2A1,CSNK2B,ZNF516,CTNNB1,MED18,GAPDH,SRI,PTK2,DDX6,NOP2,THRAP3,ICE1,ECM1,CCNE2,GNB4
Pubmed	20360068	Systematic analysis of human protein complexes identifies chromosome segregation proteins.	Pubmed	3.838e-05	1	0.0168	0.1943	32	1149	ASXL1,CBX3,ARID1A,TTK,TUFT1,TACC3,ANPEP,CHCHD6,APOA1,CCDC12,NSMCE2,PPP1R8,CEP72,ZFR,EIF3H,WDTC1,EIF3E,DDX6,COPS7A,LIN37,MYCBP,NOP2,GNL1,THRAP3,CA2,RAD21,UBE2C,SPAG9,FGFR1OP,GNB4,RNF41,RPA2
Pubmed	12853948	The DNA sequence of human chromosome 7.	Pubmed	4.01e-05	1	0.0168	0.1943	18	468	CHN2,TWIST1,CLCN1,NXPH1,PON1,ADAM22,CREB5,OSBPL3,MPP6,FAM131B,HDAC9,DBF4,TAX1BP1,SKAP2,NPY,ARHGEF5,GRB10,HIBADH
Pubmed	2138915	Structure and chromosome assignment of the murine p36 (calpactin I heavy chain) gene.	Pubmed	4.019e-05	1	0.0168	0.1943	3	6	ME1,ANPEP,APOA1
Pubmed	10362356	Contribution of Src and Ras pathways in FGF-2 induced endothelial cell differentiation.	Pubmed	4.019e-05	1	0.0168	0.1943	3	6	MBP,SHC1,PTK2
Pubmed	19106236	Apolipoprotein A-I, A-II, C-II, and H expression in the developing lung and sex difference in surfactant lipids.	Pubmed	4.019e-05	1	0.0168	0.1943	3	6	APOA1,APOC2,APOE
Pubmed	19567438	Genetic Loci associated with C-reactive protein levels and risk of coronary heart disease.	Pubmed	4.019e-05	1	0.0168	0.1943	3	6	APOC1,APOE,IL6R
Pubmed	447069	Use of two-dimensional electrophoresis to identify and map new mouse genes.	Pubmed	4.019e-05	1	0.0168	0.1943	3	6	ME1,APOA1,CA2
Pubmed	18397270	Alterations in the thymocyte phenotype of EphB-deficient mice largely affect the double negative cell compartment.	Pubmed	4.019e-05	1	0.0168	0.1943	3	6	EPHB2,KRT5,KRT8
Pubmed	12151522	Recruitment of the kainate receptor subunit glutamate receptor 6 by cadherin/catenin complexes.	Pubmed	4.019e-05	1	0.0168	0.1943	3	6	CTNNB1,LIN7B,GRIK2
Pubmed	20602615	Physiogenomic analysis of statin-treated patients: domain-specific counter effects within the ACACB gene on low-density lipoprotein cholesterol?	Pubmed	4.043e-05	1	0.0168	0.1943	11	192	CHRNA7,PKLR,PON1,APOA1,APOA4,APOE,SLC6A3,GNB3,NPY,DRD2,TNFRSF1A
Pubmed	27880917	Phenotypic and Interaction Profiling of the Human Phosphatases Identifies Diverse Mitotic Regulators.	Pubmed	4.085e-05	1	0.0168	0.1943	30	1048	TRIO,GABARAP,RCC1,ARID1A,ME1,CGN,HSPA2,NCK2,SHC1,XRCC1,PPP1R8,TBC1D31,CEP72,PDP1,CSNK2A1,SNTB1,TEX10,CIC,PTPN3,PTPN6,KIF15,ANKRD28,STX17,KRT5,KRT8,SPAG9,FAM171A1,PTP4A3,GNB4,RPA2
Pubmed	8723724	A gene-rich cluster between the CD4 and triosephosphate isomerase genes at human chromosome 12p13.	Pubmed	4.227e-05	1	0.0168	0.1943	4	16	P3H3,GNB3,CD4,TPI1
Pubmed	17855807	Maternal and fetal variation in genes of cholesterol metabolism is associated with preterm delivery.	Pubmed	4.227e-05	1	0.0168	0.1943	4	16	APOA1,APOA4,APOC2,APOE
Pubmed	10391210	Patterns of single-nucleotide polymorphisms in candidate genes for blood-pressure homeostasis.	Pubmed	4.227e-05	1	0.0168	0.1943	4	16	APOA4,APOC1,APOC2,CYP11B2
Pubmed	17520166	Characterization of chromosomal inversion of the mouse hairy ears (Eh) mutation associated with cleft palate.	Pubmed	4.227e-05	1	0.0168	0.1943	4	16	MRPL13,MTBP,SNTB1,HAS2
Pubmed	20880607	Exploration of 16 candidate genes identifies the association of IDE with Alzheimer's disease in Han Chinese.	Pubmed	4.227e-05	1	0.0168	0.1943	4	16	CHRNB2,APOC1,APOE,GAPDHS
Pubmed	20351714	Poor replication of candidate genes for major depressive disorder using genome-wide association data.	Pubmed	4.646e-05	1	0.0168	0.1943	6	51	APOE,GNB3,NPY,PDE11A,DRD2,M6PR
Pubmed	8125298	Oligo-capping: a simple method to replace the cap structure of eukaryotic mRNAs with oligoribonucleotides.	Pubmed	4.671e-05	1	0.0168	0.1943	45	1883	TBRG4,TMEM222,ARID1A,ME1,RXRB,TUFT1,FABP5,MFAP2,PKLR,TACC3,DEPTOR,SHC1,APOC1,PIGV,SLC40A1,POLR3C,ARNT,MTF1,EIF3H,EMC2,CTPS1,CTRL,IL6R,CX3CR1,CYLD,IL16,SQLE,NDUFV1,DNALI1,DAP3,PTPN6,C1R,GAPDHS,SKAP2,KRT8,AKIRIN1,TNFRSF11B,MECR,HEY1,PCSK7,CD79A,WDR73,TSHZ1,M6PR,TPI1
Pubmed	19060904	An empirical framework for binary interactome mapping.	Pubmed	4.754e-05	1	0.0168	0.1943	12	231	LENG8,FDPS,ADAMTSL4,RABAC1,CRYBA2,MTF1,EIF3H,IL16,PITPNC1,GEM,ISG20L2,PBXIP1
Pubmed	20551380	Proteomics characterization of extracellular space components in the human aorta.	Pubmed	4.767e-05	1	0.0168	0.1943	8	101	COL4A2,APCS,APOA1,APOA4,APOE,COL21A1,CLEC3B,TNXB
Pubmed	19491387	Severe obesity is associated with novel single nucleotide polymorphisms of the ESR1 and PPARgamma locus in Han Chinese.	Pubmed	5.032e-05	1	0.0168	0.1943	5	32	NR0B2,GNB3,NPY,DRD2,LIPE
Pubmed	19336475	Integrated associations of genotypes with multiple blood biomarkers linked to coronary heart disease risk.	Pubmed	5.412e-05	1	0.0168	0.1943	7	76	APOA1,APOA4,APOC1,APOC2,APOE,IL6R,LIPE
Pubmed	21565611	Mapping the NPHP-JBTS-MKS protein network reveals ciliopathy disease genes and pathways.	Pubmed	5.44e-05	1	0.0168	0.1943	19	524	GLT1D1,RPS19,CHD4,FABP5,CC2D2A,PLEC,HSPA2,INVS,PRSS1,GAPDH,NAV3,THRAP3,FKBP14,KIF2C,KRT5,KRT8,TPPP,GRB10,TPI1
Pubmed	20734064	A large-scale candidate gene association study of age at menarche and age at natural menopause.	Pubmed	6.133e-05	1	0.0168	0.1943	13	275	NOG,GDF6,CHRNA7,CHRNB2,NR0B2,APOE,SLC6A3,TAX1BP1,GNB3,NPY,DRD2,CITED4,LIPE
Pubmed	18554416	Identification of transcripts with enriched expression in the developing and adult pancreas.	Pubmed	6.183e-05	1	0.0168	0.1943	20	575	MFAP2,TMEM245,CGN,FXYD3,MFSD1,NR0B2,ANPEP,DERL1,APLP1,APOA1,CRABP2,CRYBA2,CTRL,ST14,ADAMTS16,UBE2C,LARS2,EVA1B,CELF3,ENTPD3
Pubmed	18193044	Six new loci associated with blood low-density lipoprotein cholesterol, high-density lipoprotein cholesterol or triglycerides in humans.	Pubmed	6.808e-05	1	0.0168	0.1943	5	34	APOA1,APOA4,APOC1,APOC2,APOE
Pubmed	19197348	Genome-wide association studies in an isolated founder population from the Pacific Island of Kosrae.	Pubmed	6.808e-05	1	0.0168	0.1943	5	34	TOMM40,ITGA8,APOC1,APOC2,APOE
Pubmed	18583988	Phospho-dependent interactions between NBS1 and MDC1 mediate chromatin retention of the MRN complex at sites of DNA damage.	Pubmed	6.966e-05	1	0.0168	0.1943	3	7	CSNK2A1,CSNK2B,MDC1
Pubmed	18713744	Ephrin-B2-induced cleavage of EphB2 receptor is mediated by matrix metalloproteinases to trigger cell repulsion.	Pubmed	6.966e-05	1	0.0168	0.1943	3	7	EPHB2,MMP9,PTK2
Pubmed	18823627	Association of lipoprotein lipase D9N polymorphism with myocardial infarction in type 2 diabetes: the genetics, outcomes, and lipids in type 2 diabetes (GOLD) study.	Pubmed	6.966e-05	1	0.0168	0.1943	3	7	PON1,APOA1,APOE
Pubmed	17515609	Prolonged Sox4 expression in oligodendrocytes interferes with normal myelination in the central nervous system.	Pubmed	6.966e-05	1	0.0168	0.1943	3	7	MBP,AIF1,SOX4
Pubmed	10964718	Comparative analysis of the human and mouse Hey1 promoter: Hey genes are new Notch target genes.	Pubmed	6.966e-05	1	0.0168	0.1943	3	7	GBA,ECM1,HEY1
Pubmed	10886019	Enzyme-activity mutants in Mus musculus. I. Phenotypic description and genetic characterization of ethylnitrosourea-induced mutations.	Pubmed	6.966e-05	1	0.0168	0.1943	3	7	PKLR,GAPDH,TPI1
Pubmed	25065758	Dynamic microtubules catalyze formation of navigator-TRIO complexes to regulate neurite extension.	Pubmed	6.966e-05	1	0.0168	0.1943	3	7	TRIO,NAV3,NAV2
Pubmed	2792009	The structural genes encoding P450scc and P450arom are closely linked on mouse chromosome 9.	Pubmed	6.966e-05	1	0.0168	0.1943	3	7	ME1,ANPEP,APOA1
Pubmed	6403543	Genetic control of lipid transport in mice. II. Genes controlling structure of high density lipoproteins.	Pubmed	6.966e-05	1	0.0168	0.1943	3	7	ME1,ANPEP,APOA1
Pubmed	10806215	Endogenous protein kinase CK2 participates in Wnt signaling in mammary epithelial cells.	Pubmed	6.966e-05	1	0.0168	0.1943	3	7	CSNK2A1,CSNK2B,CTNNB1
Pubmed	15509224	Conserved expression domains for genes upstream and within the HoxA and HoxD clusters suggests a long-range enhancer existed before cluster duplication.	Pubmed	6.966e-05	1	0.0168	0.1943	3	7	CREB5,TAX1BP1,HIBADH
Pubmed	11738816	Calcium channel gamma subunits provide insights into the evolution of this gene family.	Pubmed	6.966e-05	1	0.0168	0.1943	3	7	CACNG8,CACNG7,CACNG6
Pubmed	27507650	Long-term potentiation modulates synaptic phosphorylation networks and reshapes the structure of the postsynaptic interactome.	Pubmed	7.14e-05	1	0.0168	0.1943	12	241	TRIO,TMEM132B,CNTN1,ADAM22,CSNK2B,PRKCG,CTNNB1,PTK2,RAB3B,TPPP,GRIK2,INA
Pubmed	12690205	Human chromosome 7: DNA sequence and biology.	Pubmed	7.329e-05	1	0.0168	0.1943	19	536	TBRG4,CBX3,CHN2,TWIST1,TRPV6,NXPH1,PON1,CREB5,CROT,OSBPL3,MPP6,PRSS1,RAPGEF5,TAX1BP1,SKAP2,NPY,FKBP14,HIBADH,TRPV5
Pubmed	8812484	Detailed comparative map of human chromosome 19q and related regions of the mouse genome.	Pubmed	7.86e-05	1	0.0168	0.1943	5	35	FPR1,XRCC1,PRKCG,CD37,CD79A
Pubmed	15102471	Bioinformatics and cellular signaling.	Pubmed	8.353e-05	1	0.0168	0.1943	10	173	MAPK12,TMEM158,SHC1,ZHX2,CTNNB1,HDAC9,IL16,ZBTB7B,ARHGEF1,TNFRSF1A
Pubmed	22675492	Genome-wide association study of circulating estradiol, testosterone, and sex hormone-binding globulin in postmenopausal women.	Pubmed	8.732e-05	1	0.0168	0.1943	4	19	SNED1,MYOCD,PLEKHA8,FKBP14
Pubmed	26638075	A Dynamic Protein Interaction Landscape of the Human Centrosome-Cilium Interface.	Pubmed	8.922e-05	1	0.0168	0.1943	43	1820	TMEM67,TRIO,TMEM222,TTK,STX12,FZD6,TMEM245,EMG1,CC2D2A,HSPA2,MRTFA,NCK2,CERS2,DERL1,MBOAT7,SHC1,IBTK,SLC9A1,TBC1D31,CEP72,PHACTR4,CTNNB1,EMC2,CTPS1,DGAT1,INVS,CYLD,RBM12B,NDUFV1,CDKAL1,PROSER3,NCAPD2,ANKRD28,TAF12,NOP2,KIF2C,CACNA1A,FGFR1OP,FAM171A1,INA,CKAP2L,EBAG9,RPA2
Pubmed	29459677	A CRISPR-based screen for Hedgehog signaling provides insights into ciliary function and ciliopathies.	Pubmed	9.019e-05	1	0.0168	0.1943	12	247	TRIO,PLEC,IFFO1,SHC1,OSBPL3,CSNK2A1,PRSS1,GAPDH,THRAP3,KRT5,ARHGEF5,ICE1
Pubmed	29128334	A Map of Human Mitochondrial Protein Interactions Linked to Neurodegeneration Reveals New Mechanisms of Redox Homeostasis and NF-?B Signaling.	Pubmed	9.275e-05	1	0.0168	0.1943	24	787	CBX3,RCC1,CHD4,ADAR,CGN,TOMM40,PLEC,MRPL13,CSNK2B,MDC1,EIF3H,EMC2,CTPS1,GAPDH,EIF3E,DAP3,MYCBP,TAX1BP1,UBE2S,THRAP3,INA,MYH14,RPA2,TPI1
Pubmed	23398456	The P-body component USP52/PAN2 is a novel regulator of HIF1A mRNA stability.	Pubmed	9.644e-05	1	0.0168	0.1943	14	328	RPS9,RPS19,PLEC,NSMCE2,EIF3H,SMPDL3B,MYCBP,THRAP3,KRT8,INA,MYH14,GNB4,RPA2,RPL18
Pubmed	22516433	Proteomic analysis of microvesicles from plasma of healthy donors reveals high individual variability.	Pubmed	9.849e-05	1	0.0168	0.1943	9	143	HSPA2,PON1,APCS,APOA1,APOA4,APOE,PRSS1,C1R,C4A
Pubmed	20459474	Can we predict top-level sports performance in power vs endurance events? A genetic approach.	Pubmed	0.0001081	1	0.0168	0.1943	4	20	APOA1,APOE,GNB3,NPY
Pubmed	19668339	Hippocampal atrophy as a quantitative trait in a genome-wide association study identifying novel susceptibility genes for Alzheimer's disease.	Pubmed	0.0001081	1	0.0168	0.1943	4	20	S100A5,TOMM40,APOE,MAL2
Pubmed	16543246	Mouse cristin/R-spondin family proteins are novel ligands for the Frizzled 8 and LRP6 receptors and activate beta-catenin-dependent gene expression.	Pubmed	0.0001104	1	0.0168	0.1943	3	8	RSPO2,CTNNB1,RSPO1
Pubmed	20381197	ACE variants and risk of intracerebral hemorrhage recurrence in amyloid angiopathy.	Pubmed	0.0001104	1	0.0168	0.1943	3	8	MMP9,APOE,CYP11B2
Pubmed	10072631	Molecular genetics of the human MHC complement gene cluster.	Pubmed	0.0001104	1	0.0168	0.1943	3	8	CYP21A2,C4A,TNXB
Pubmed	17154273	Proteomic analysis of human very low-density lipoprotein by two-dimensional gel electrophoresis and MALDI-TOF/TOF.	Pubmed	0.0001104	1	0.0168	0.1943	3	8	APOA1,APOA4,APOE
Pubmed	16603319	Expression of discoidin domain receptor 1 during mouse brain development follows the progress of myelination.	Pubmed	0.0001104	1	0.0168	0.1943	3	8	MBP,CA2,DDR1
Pubmed	16682745	Isolation and characterization of human apolipoprotein M-containing lipoproteins.	Pubmed	0.0001104	1	0.0168	0.1943	3	8	PON1,APOA1,APOC2
Pubmed	17558413	Determination of the sites of tyrosine O-sulfation in peptides and proteins.	Pubmed	0.0001104	1	0.0168	0.1943	3	8	CCR8,CMKLR1,GPR1
Pubmed	7626889	The genes coding for alpha and beta catenin (Catna1 and Catnb) and plakoglobin (Jup) map to mouse chromosomes 18, 9, and 11, respectively.	Pubmed	0.0001104	1	0.0168	0.1943	3	8	MBP,ME1,CTNNB1
Pubmed	23631828	Identification of potential bladder cancer markers in urine by abundant-protein depletion coupled with quantitative proteomics.	Pubmed	0.0001104	1	0.0168	0.1943	3	8	APOA1,APOC2,APOE
Pubmed	17652770	Calcium channel gamma subunits: a functionally diverse protein family.	Pubmed	0.0001104	1	0.0168	0.1943	3	8	CACNG8,CACNG7,CACNG6
Pubmed	12037680	CK2-dependent phosphorylation of the E2 ubiquitin conjugating enzyme UBC3B induces its interaction with beta-TrCP and enhances beta-catenin degradation.	Pubmed	0.0001104	1	0.0168	0.1943	3	8	CSNK2A1,CSNK2B,CTNNB1
Pubmed	18624398	Protein interaction data set highlighted with human Ras-MAPK/PI3K signaling pathways.	Pubmed	0.0001108	1	0.0168	0.1943	10	179	ASXL1,PKLR,APCS,APOA1,CLEC4G,GAPDH,CYP4A11,SRI,GEM,PBXIP1
Pubmed	15635413	Nucleolar proteome dynamics.	Pubmed	0.0001153	1	0.0168	0.1943	16	419	RPS9,CBX3,U2AF2,RPS19,RCC1,CHD4,ADAR,PLEC,S100A16,XRCC1,ZFR,KDM2A,GAPDH,KIF2C,GRWD1,RPL18
Pubmed	19625176	PTEN identified as important risk factor of chronic obstructive pulmonary disease.	Pubmed	0.0001162	1	0.0168	0.1943	15	376	RXRB,FZD7,APOA4,XRCC1,APOE,SLC6A3,ARNT,CTNNB1,IL6R,CX3CR1,HSPB8,DRD2,CD4,CD86,TNFRSF1A
Pubmed	12082592	Multi-locus interactions predict risk for post-PTCA restenosis: an approach to the genetic analysis of common complex disease.	Pubmed	0.0001172	1	0.0168	0.1943	6	60	MMP9,PON1,APOA4,APOE,GNB3,TNFRSF1A
Pubmed	22586326	Functional proteomics establishes the interaction of SIRT7 with chromatin remodeling complexes and expands its role in regulation of RNA polymerase I transcription.	Pubmed	0.0001224	1	0.0168	0.1943	21	653	CBX3,U2AF2,RPS19,CHD4,ARID1A,CGN,PLEC,HSPA2,DCAF13,CSNK2A1,MDC1,ZFR,EIF3E,TEX10,NCAPD2,ANKRD28,NOP2,RAD21,SPAG9,INA,MYH14
Pubmed	27591049	SPATA2 Links CYLD to LUBAC, Activates CYLD, and Controls LUBAC Signaling.	Pubmed	0.0001263	1	0.0168	0.1943	19	559	RPS9,RPS19,FABP5,PLEC,MRPL13,EIF3H,CTPS1,CYLD,MYH13,GAPDH,EIF3E,NOP2,THRAP3,KRT5,KRT8,KRT84,ECM1,TNFRSF1A,RPL18
Pubmed	16335952	Human plasma N-glycoproteome analysis by immunoaffinity subtraction, hydrazide chemistry, and mass spectrometry.	Pubmed	0.000131	1	0.0168	0.1943	12	257	ADAMTSL4,CNTN1,ANPEP,PON1,APCS,ITGA1,PVR,C1R,C4A,ECM1,BCAM,TNXB
Pubmed	20849852	Proliferating cell nuclear antigen in the cytoplasm interacts with components of glycolysis and cancer.	Pubmed	0.0001321	1	0.0168	0.1943	4	21	PKLR,GAPDH,CA2,TPI1
Pubmed	29348145	FBXL13 directs the proteolysis of CEP192 to regulate centrosome homeostasis and cell migration.	Pubmed	0.0001337	1	0.0168	0.1943	5	39	CIART,CGN,IL16,VWDE,ENY2
Pubmed	18676680	Pathway-based evaluation of 380 candidate genes and lung cancer susceptibility suggests the importance of the cell cycle pathway.	Pubmed	0.0001343	1	0.0168	0.1943	15	381	RXRB,FZD7,APOA4,XRCC1,APOE,SLC6A3,ARNT,CTNNB1,IL6R,CX3CR1,HSPB8,DRD2,CD4,CD86,TNFRSF1A
Pubmed	23533145	In-depth proteomic analyses of exosomes isolated from expressed prostatic secretions in urine.	Pubmed	0.0001359	1	0.0168	0.1943	29	1068	FABP5,MMP9,ALOX15B,CNTN1,COL4A2,ANPEP,PON1,APCS,APOA1,APOA4,TMC4,APOE,GLIPR2,GAPDH,SRI,GBA,TMBIM1,SMPDL3B,C1R,C4A,GNB3,RAB3B,KRT8,MAN1C1,KRT84,GNB4,CLEC3B,TNXB,TPI1
Pubmed	24332808	PRP19 transforms into a sensor of RPA-ssDNA after DNA damage and drives ATR activation via a ubiquitin-mediated circuitry.	Pubmed	0.0001404	1	0.0168	0.1943	14	340	RPS9,CHD4,ADAR,EMG1,XRCC1,PARP14,MDC1,ZFR,GAPDH,TEX10,COBL,RAD21,RPA2,RPL18
Pubmed	19170196	Polymorphisms in innate immunity genes and lung cancer risk in Xuanwei, China.	Pubmed	0.0001422	1	0.0168	0.1943	15	383	RXRB,FZD7,APOA4,XRCC1,APOE,SLC6A3,ARNT,CTNNB1,IL6R,CX3CR1,HSPB8,DRD2,CD4,CD86,TNFRSF1A
Pubmed	25921289	Temporal proteomics of NGF-TrkA signaling identifies an inhibitory role for the E3 ligase Cbl-b in neuroblastoma cell differentiation.	Pubmed	0.0001489	1	0.0168	0.1943	44	1922	TBRG4,TRIO,RPS9,U2AF2,CHD4,ADAR,TTK,FDPS,TACC3,SHC1,XRCC1,CSNK2A1,CSNK2B,CTNNB1,EIF3H,EMC2,MPP6,CTPS1,GAPDH,EIF3E,GBA,TEX10,CIC,PTK2,DDX6,DAP3,KIF15,TAX1BP1,NCAPD2,ANKRD28,NOP2,GNL1,THRAP3,KIF2C,RAD21,SPAG9,LARS2,FAM171A1,INA,ARHGEF1,PBXIP1,EPB41,RPL18,TPI1
Pubmed	24912173	Yolk-sac-derived macrophages regulate fetal testis vascularization and morphogenesis.	Pubmed	0.0001599	1	0.0168	0.1943	4	22	AIF1,CX3CR1,CD4,CD86
Pubmed	15301860	Identification of single nucleotide polymorphisms in the tumor necrosis factor (TNF) and TNF receptor superfamily in the Korean population.	Pubmed	0.0001599	1	0.0168	0.1943	4	22	TNFRSF25,TNFRSF11B,CD27,TNFRSF1A
Pubmed	23334579	Microglia emerge from erythromyeloid precursors via Pu.1- and Irf8-dependent pathways.	Pubmed	0.0001599	1	0.0168	0.1943	4	22	TYROBP,AIF1,MMP9,CX3CR1
Pubmed	12819125	Targeting a complex transcriptome: the construction of the mouse full-length cDNA encyclopedia.	Pubmed	0.0001599	1	0.0168	0.1943	11	224	TBRG4,COLQ,ADAR,PKLR,CERS2,APOE,CTNNB1,C4A,STX17,FKBP14,KRT84
Pubmed	8650181	Two genes abrogate the inhibition of murine hepatocarcinogenesis by ovarian hormones.	Pubmed	0.000164	1	0.0168	0.1943	3	9	RXRB,CYP21A2,C4A
Pubmed	19464326	HSPB7 is a SC35 speckle resident small heat shock protein.	Pubmed	0.000164	1	0.0168	0.1943	3	9	HSPB6,HSPB8,HSPB9
Pubmed	24594519	Meis1 is required for the maintenance of postnatal thymic epithelial cells.	Pubmed	0.000164	1	0.0168	0.1943	3	9	KRT5,KRT8,CD4
Pubmed	18830417	Deletion of GSK-3beta in mice leads to hypertrophic cardiomyopathy secondary to cardiomyoblast hyperproliferation.	Pubmed	0.000164	1	0.0168	0.1943	3	9	PLXNA2,CTNNB1,TNFRSF1A
Pubmed	12116231	Candidate genes involved in cardiovascular risk factors by a family-based association study on the island of Kosrae, Federated States of Micronesia.	Pubmed	0.000164	1	0.0168	0.1943	3	9	APOA1,APOA4,APOE
Pubmed	29386246	?-Catenin signaling is essential for mammalian larynx recanalization and the establishment of vocal fold progenitor cells.	Pubmed	0.000164	1	0.0168	0.1943	3	9	CTNNB1,KRT5,KRT8
Pubmed	14999024	Quantitative trait Loci specifying the response of body temperature to dietary restriction.	Pubmed	0.000164	1	0.0168	0.1943	3	9	APOA1,APOA4,DRD2
Pubmed	16030523	Genetic determinants of plasma HDL-cholesterol levels in familial hypercholesterolemia.	Pubmed	0.000164	1	0.0168	0.1943	3	9	PON1,APOA4,APOE
Pubmed	23385359	Parkinson's disease plasma biomarkers: an automated literature analysis followed by experimental validation.	Pubmed	0.000164	1	0.0168	0.1943	3	9	APCS,APOA1,APOE
Pubmed	22832961	Genome-wide association study of Alzheimer's disease.	Pubmed	0.000164	1	0.0168	0.1943	3	9	TOMM40,APOC1,APOE
Pubmed	17620617	GluR7 is an essential subunit of presynaptic kainate autoreceptors at hippocampal mossy fiber synapses.	Pubmed	0.0001648	1	0.0168	0.1943	2	2	GRIK2,GRIK3
Pubmed	20362697	No or only population-specific effect of PON1 on human longevity: a comprehensive meta-analysis.	Pubmed	0.0001648	1	0.0168	0.1943	2	2	PON1,APOE
Pubmed	14578863	PTK2 and EIF3S3 genes may be amplification targets at 8q23-q24 and are associated with large hepatocellular carcinomas.	Pubmed	0.0001648	1	0.0168	0.1943	2	2	EIF3H,PTK2
Pubmed	15381926	Effects of dopamine D2 receptor (DRD2) and transporter (SLC6A3) polymorphisms on smoking cue-induced cigarette craving among African-American smokers.	Pubmed	0.0001648	1	0.0168	0.1943	2	2	SLC6A3,DRD2
Pubmed	28696300	Acetylcholine-producing NK cells attenuate CNS inflammation via modulation of infiltrating monocytes/macrophages.	Pubmed	0.0001648	1	0.0168	0.1943	2	2	CHRNA7,CX3CR1
Pubmed	28672022	APOE ?4-TOMM40 '523 haplotypes and the risk of Alzheimer's disease in older Caucasian and African Americans.	Pubmed	0.0001648	1	0.0168	0.1943	2	2	TOMM40,APOE
Pubmed	11827176	Consequences of CK2 signaling to the nuclear matrix.	Pubmed	0.0001648	1	0.0168	0.1943	2	2	CSNK2A1,CSNK2B
Pubmed	17599952	Down-regulation of the dopamine receptor D2 in mice lacking ataxin 1.	Pubmed	0.0001648	1	0.0168	0.1943	2	2	ATXN1,DRD2
Pubmed	24260406	Alzheimer's disease susceptibility genes APOE and TOMM40, and hippocampal volumes in the Lothian birth cohort 1936.	Pubmed	0.0001648	1	0.0168	0.1943	2	2	TOMM40,APOE
Pubmed	17500623	Joint effect of dopaminergic genes on likelihood of smoking following treatment with bupropion SR.	Pubmed	0.0001648	1	0.0168	0.1943	2	2	SLC6A3,DRD2
Pubmed	27072961	Over-expression of Sox4 and ?-catenin is associated with a less favorable prognosis of osteosarcoma.	Pubmed	0.0001648	1	0.0168	0.1943	2	2	CTNNB1,SOX4
Pubmed	15584908	Apolipoprotein E isoforms and apolipoprotein AI protect from amyloid precursor protein carboxy terminal fragment-associated cytotoxicity.	Pubmed	0.0001648	1	0.0168	0.1943	2	2	APOA1,APOE
Pubmed	15769335	[Genetic association of apoE and apoCI gene polymorphisms with coronary heart disease].	Pubmed	0.0001648	1	0.0168	0.1943	2	2	APOC1,APOE
Pubmed	15990874	Metabolon disruption: a mechanism that regulates bicarbonate transport.	Pubmed	0.0001648	1	0.0168	0.1943	2	2	SLC26A6,CA2
Pubmed	22939506	Aging magnifies the effects of dopamine transporter and D2 receptor genes on backward serial memory.	Pubmed	0.0001648	1	0.0168	0.1943	2	2	SLC6A3,DRD2
Pubmed	16086018	Function of NKG2D in natural killer cell-mediated rejection of mouse bone marrow grafts.	Pubmed	0.0001648	1	0.0168	0.1943	2	2	TYROBP,HCST
Pubmed	15090300	[Gln192Arg polymorphism of the paraoxonase-1 gene is not associated with Alzheimer's disease in Chinese].	Pubmed	0.0001648	1	0.0168	0.1943	2	2	PON1,APOE
Pubmed	20176802	Ras activation of Erk restores impaired tonic BCR signaling and rescues immature B cell differentiation.	Pubmed	0.0001648	1	0.0168	0.1943	2	2	EPHB2,CD79A
Pubmed	20029386	A TOMM40 variable-length polymorphism predicts the age of late-onset Alzheimer's disease.	Pubmed	0.0001648	1	0.0168	0.1943	2	2	TOMM40,APOE
Pubmed	17584502	Beta2 subunit containing acetylcholine receptors mediate nicotine withdrawal deficits in the acquisition of contextual fear conditioning.	Pubmed	0.0001648	1	0.0168	0.1943	2	2	CHRNA7,CHRNB2
Pubmed	24806827	Deficiency of the NR4A orphan nuclear receptor NOR1 in hematopoietic stem cells accelerates atherosclerosis.	Pubmed	0.0001648	1	0.0168	0.1943	2	2	APOE,NR4A3
Pubmed	12736801	Apolipoproteins E and C1 and brain morphology in memory impaired elders.	Pubmed	0.0001648	1	0.0168	0.1943	2	2	APOC1,APOE
Pubmed	19332875	Ly49H signaling through DAP10 is essential for optimal natural killer cell responses to mouse cytomegalovirus infection.	Pubmed	0.0001648	1	0.0168	0.1943	2	2	TYROBP,HCST
Pubmed	12231569	Mast cell chymase degrades apoE and apoA-II in apoA-I-knockout mouse plasma and reduces its ability to promote cellular cholesterol efflux.	Pubmed	0.0001648	1	0.0168	0.1943	2	2	APOA1,CTRL
Pubmed	21354244	The role of dopamine transporter (SLC6A3) and dopamine D2 receptor/ankyrin repeat and kinase domain containing 1 (DRD2/ANKK1) gene polymorphisms in personality traits.	Pubmed	0.0001648	1	0.0168	0.1943	2	2	SLC6A3,DRD2
Pubmed	22958175	Association of dopamine-related gene alleles, smoking behavior and decline in FEV1 in subjects with COPD: findings from the lung health study.	Pubmed	0.0001648	1	0.0168	0.1943	2	2	SLC6A3,DRD2
Pubmed	8276416	The mouse apolipoprotein C1 gene: structure and expression.	Pubmed	0.0001648	1	0.0168	0.1943	2	2	APOC2,APOE
Pubmed	19242924	First-trimester maternal serum matrix metalloproteinase-9 (MMP-9) and adverse pregnancy outcome.	Pubmed	0.0001648	1	0.0168	0.1943	2	2	MMP9,TNFRSF1A
Pubmed	26576771	Combined Genome-Wide CSF A?-42's Associations and Simple Network Properties Highlight New Risk Factors for Alzheimer's Disease.	Pubmed	0.0001648	1	0.0168	0.1943	2	2	TOMM40,APOC1
Pubmed	16631424	Association of APOE-C1 gene cluster polymorphisms with gallstone disease.	Pubmed	0.0001648	1	0.0168	0.1943	2	2	APOC1,APOE
Pubmed	7916738	Evolutionary conservation of the mouse apolipoprotein e-c1-c2 gene cluster: structure and genetic variability in inbred mice.	Pubmed	0.0001648	1	0.0168	0.1943	2	2	APOC2,APOE
Pubmed	7910967	Molecular and functional analysis of a lymphocyte chemoattractant factor: association of biologic function with CD4 expression.	Pubmed	0.0001648	1	0.0168	0.1943	2	2	IL16,CD4
Pubmed	20554017	PTSD and dopaminergic genes, DRD2 and DAT, in multigenerational families exposed to the Spitak earthquake.	Pubmed	0.0001648	1	0.0168	0.1943	2	2	SLC6A3,DRD2
Pubmed	26310205	APOE/TOMM40 genetic loci, white matter hyperintensities, and cerebral microbleeds.	Pubmed	0.0001648	1	0.0168	0.1943	2	2	TOMM40,APOE
Pubmed	28644829	Swapping the N- and C-terminal domains of human apolipoprotein E3 and AI reveals insights into their structure/activity relationship.	Pubmed	0.0001648	1	0.0168	0.1943	2	2	APOA1,APOE
Pubmed	25314968	Reciprocal allosteric regulation of p38? and PTPN3 involves a PDZ domain-modulated complex formation.	Pubmed	0.0001648	1	0.0168	0.1943	2	2	MAPK12,PTPN3
Pubmed	25378227	Twist-related protein 1 enhances oral tongue squamous cell carcinoma cell invasion through ?-catenin signaling.	Pubmed	0.0001648	1	0.0168	0.1943	2	2	TWIST1,CTNNB1
Pubmed	21482781	HDL promotes rapid atherosclerosis regression in mice and alters inflammatory properties of plaque monocyte-derived cells.	Pubmed	0.0001648	1	0.0168	0.1943	2	2	APOA1,APOE
Pubmed	15557194	Lipopolysaccharide induces matrix metalloproteinase-9 expression via a mitochondrial reactive oxygen species-p38 kinase-activator protein-1 pathway in Raw 264.7 cells.	Pubmed	0.0001648	1	0.0168	0.1943	2	2	MMP9,PRKCG
Pubmed	11701467	Increased cholesterol efflux in apolipoprotein AI (ApoAI)-producing macrophages as a mechanism for reduced atherosclerosis in ApoAI((-/-)) mice.	Pubmed	0.0001648	1	0.0168	0.1943	2	2	APOA1,APOE
Pubmed	16374516	Macrophage expression of active MMP-9 induces acute plaque disruption in apoE-deficient mice.	Pubmed	0.0001648	1	0.0168	0.1943	2	2	MMP9,APOE
Pubmed	21725609	PRL-3 promotes the proliferation of LoVo cells via the upregulation of KCNN4 channels.	Pubmed	0.0001648	1	0.0168	0.1943	2	2	KCNN4,PTP4A3
Pubmed	18062282	[The expressions and significance of CK2 in normal laryngeal mucosa, laryngeal precancerosis and laryngeal squamous cell carcinoma].	Pubmed	0.0001648	1	0.0168	0.1943	2	2	CSNK2A1,CSNK2B
Pubmed	14625090	Expression of gec1/GABARAPL1 versus GABARAP mRNAs in human: predominance of gec1/GABARAPL1 in the central nervous system.	Pubmed	0.0001648	1	0.0168	0.1943	2	2	GABARAP,GABARAPL1
Pubmed	11790724	Selective activation of central subtypes of the nicotinic acetylcholine receptor has opposite effects on neonatal excitotoxic brain injuries.	Pubmed	0.0001648	1	0.0168	0.1943	2	2	CHRNA7,CHRNB2
Pubmed	19176830	Genetically determined interaction between the dopamine transporter and the D2 receptor on prefronto-striatal activity and volume in humans.	Pubmed	0.0001648	1	0.0168	0.1943	2	2	SLC6A3,DRD2
Pubmed	27522251	A role for ?2* nicotinic receptors in a model of local amyloid pathology induced in dentate gyrus.	Pubmed	0.0001648	1	0.0168	0.1943	2	2	CHRNA7,CHRNB2
Pubmed	17016705	The nicotinic antagonist mecamylamine has antidepressant-like effects in wild-type but not beta2- or alpha7-nicotinic acetylcholine receptor subunit knockout mice.	Pubmed	0.0001648	1	0.0168	0.1943	2	2	CHRNA7,CHRNB2
Pubmed	22130050	Kinesin family member 2C (KIF2C/MCAK) is a novel marker for prognosis in human gliomas.	Pubmed	0.0001648	1	0.0168	0.1943	2	2	KIF2C,KIFC2
Pubmed	19696430	CD4-CD8 lineage differentiation: Thpok-ing into the nucleus.	Pubmed	0.0001648	1	0.0168	0.1943	2	2	ZBTB7B,CD4
Pubmed	24175891	Active form of the protein kinase CK2 ?2?2 holoenzyme is a strong complex with symmetric architecture.	Pubmed	0.0001648	1	0.0168	0.1943	2	2	CSNK2A1,CSNK2B
Pubmed	28751540	TTK Inhibitors as a Targeted Therapy for	Pubmed	0.0001648	1	0.0168	0.1943	2	2	TTK,CTNNB1
Pubmed	16497661	Characterization of a new mouse model for human apolipoprotein A-I/C-III/A-IV deficiency.	Pubmed	0.0001648	1	0.0168	0.1943	2	2	APOA1,APOA4
Pubmed	25164318	First evidence of TRPV5 and TRPV6 channels in human parathyroid glands: possible involvement in neoplastic transformation.	Pubmed	0.0001648	1	0.0168	0.1943	2	2	TRPV6,TRPV5
Pubmed	20405023	Expression of transient receptor potential vanilloid channels TRPV5 and TRPV6 in retinal pigment epithelium.	Pubmed	0.0001648	1	0.0168	0.1943	2	2	TRPV6,TRPV5
Pubmed	20373846	The apolipoprotein E gene and Taq1A polymorphisms in childhood obesity.	Pubmed	0.0001648	1	0.0168	0.1943	2	2	APOE,DRD2
Pubmed	21743470	Cocaine supersensitivity and enhanced motivation for reward in mice lacking dopamine D2 autoreceptors.	Pubmed	0.0001648	1	0.0168	0.1943	2	2	SLC6A3,DRD2
Pubmed	19785985	Macrophages from alpha 7 nicotinic acetylcholine receptor knockout mice demonstrate increased cholesterol accumulation and decreased cellular paraoxonase expression: a possible link between the nervous system and atherosclerosis development.	Pubmed	0.0001648	1	0.0168	0.1943	2	2	CHRNA7,APOE
Pubmed	20658496	Determinants of paraoxonase activity in healthy adults.	Pubmed	0.0001648	1	0.0168	0.1943	2	2	PON1,APOE
Pubmed	18378026	Role of apolipoproteins E and A-I: epistatic villains of triglyceride mediation in coronary heart disease.	Pubmed	0.0001648	1	0.0168	0.1943	2	2	APOA1,APOE
Pubmed	18204784	Allograft inflammatory factor-1 augments macrophage phagocytotic activity and accelerates the progression of atherosclerosis in ApoE-/- mice.	Pubmed	0.0001648	1	0.0168	0.1943	2	2	AIF1,APOE
Pubmed	10681566	Discoidin domain receptor 1 is activated independently of beta(1) integrin.	Pubmed	0.0001648	1	0.0168	0.1943	2	2	SHC1,DDR1
Pubmed	18083057	Nicotinic acetylcholine receptors alpha4beta2 and alpha7 regulate myelo- and erythropoiesis within the bone marrow.	Pubmed	0.0001648	1	0.0168	0.1943	2	2	CHRNA7,CHRNB2
Pubmed	17233615	Concerted action of associated proteins in the regulation of TRPV5 and TRPV6.	Pubmed	0.0001648	1	0.0168	0.1943	2	2	TRPV6,TRPV5
Pubmed	23045156	Gene-gene interaction between RBMS3 and ZNF516 influences bone mineral density.	Pubmed	0.0001648	1	0.0168	0.1943	2	2	ZNF516,RBMS3
Pubmed	24508314	Alzheimer's disease susceptibility genes APOE and TOMM40, and brain white matter integrity in the Lothian Birth Cohort 1936.	Pubmed	0.0001648	1	0.0168	0.1943	2	2	TOMM40,APOE
Pubmed	23280428	?-Aminobutyric acid type A receptor inhibition triggers a nicotinic neuroprotective mechanism.	Pubmed	0.0001648	1	0.0168	0.1943	2	2	CHRNA7,CHRNB2
Pubmed	16324157	Nuclear localization of glyceraldehyde-3-phosphate dehydrogenase is not involved in the initiation of apoptosis induced by 1-Methyl-4-phenyl-pyridium iodide (MPP+).	Pubmed	0.0001648	1	0.0168	0.1943	2	2	GAPDH,GAPDHS
Pubmed	21677994	Complement component C4A and apolipoprotein A-I in plasmas as biomarkers of the severe, early-onset preeclampsia.	Pubmed	0.0001648	1	0.0168	0.1943	2	2	APOA1,C4A
Pubmed	19247984	DAP10 associates with Ly49 receptors but contributes minimally to their expression and function in vivo.	Pubmed	0.0001648	1	0.0168	0.1943	2	2	TYROBP,HCST
Pubmed	19252179	ApoE and ApoC-I polymorphisms: association of genotype with cardiovascular disease phenotype in African Americans.	Pubmed	0.0001648	1	0.0168	0.1943	2	2	APOC1,APOE
Pubmed	25247594	Are APOE ? genotype and TOMM40 poly-T repeat length associations with cognitive ageing mediated by brain white matter tract integrity?	Pubmed	0.0001648	1	0.0168	0.1943	2	2	TOMM40,APOE
Pubmed	27418530	High FABP5 Versus CRABPII Expression Ratio in Recurrent Craniopharyngiomas: Implications for Future Treatment.	Pubmed	0.0001648	1	0.0168	0.1943	2	2	FABP5,CRABP2
Pubmed	24197863	Alpha-internexin and altered CIC expression as a supportive diagnostic marker for oligodendroglial tumors with the 1p/19q co-deletion.	Pubmed	0.0001648	1	0.0168	0.1943	2	2	CIC,INA
Pubmed	20178461	Alteration of calcium homeostasis in primary preeclamptic syncytiotrophoblasts: effect on calcium exchange in placenta.	Pubmed	0.0001648	1	0.0168	0.1943	2	2	TRPV6,TRPV5
Pubmed	28038449	Low serum paraoxonase1 activity levels predict coronary artery disease severity.	Pubmed	0.0001648	1	0.0168	0.1943	2	2	PON1,APOA1
Pubmed	28858686	Nicotinic acetylcholine receptor alpha 7 stimulation dampens splenic myelopoiesis and inhibits atherogenesis in Apoe	Pubmed	0.0001648	1	0.0168	0.1943	2	2	CHRNA7,APOE
Pubmed	16005361	Evaluation of apolipoprotein E secretion by macrophages in type 2 diabetic patients: role of HDL and apolipoprotein A-I.	Pubmed	0.0001648	1	0.0168	0.1943	2	2	APOA1,APOE
Pubmed	29273831	Synergism between apolipoprotein E ?4 allele and paraoxonase (PON1) 55-M allele is associated with risk of systemic lupus erythematosus.	Pubmed	0.0001648	1	0.0168	0.1943	2	2	PON1,APOE
Pubmed	12390878	Expression of calcium channels along the differentiation of cultured trophoblast cells from human term placenta.	Pubmed	0.0001648	1	0.0168	0.1943	2	2	TRPV6,TRPV5
Pubmed	26409626	Chronic administration of methamphetamine promotes atherosclerosis formation in ApoE-/- knockout mice fed normal diet.	Pubmed	0.0001648	1	0.0168	0.1943	2	2	APOE,NPY
Pubmed	25670332	The effects of an intronic polymorphism in TOMM40 and APOE genotypes in sporadic inclusion body myositis.	Pubmed	0.0001648	1	0.0168	0.1943	2	2	TOMM40,APOE
Pubmed	18831991	Nicotinic alpha7- or beta2-containing receptor knockout: effects on radial-arm maze learning and long-term nicotine consumption in mice.	Pubmed	0.0001648	1	0.0168	0.1943	2	2	CHRNA7,CHRNB2
Pubmed	12962909	Apolipoprotein E -491 promoter polymorphism is an independent risk factor for Alzheimer's disease in the Chinese population.	Pubmed	0.0001648	1	0.0168	0.1943	2	2	APOC1,APOE
Pubmed	25366966	Antigen-specific expansion and differentiation of natural killer cells by alloantigen stimulation.	Pubmed	0.0001648	1	0.0168	0.1943	2	2	TYROBP,HCST
Pubmed	20631314	Beta-catenin signaling mediates CD4 expression on mature CD8+ T cells.	Pubmed	0.0001648	1	0.0168	0.1943	2	2	CTNNB1,CD4
Pubmed	21884703	Atheroprotection via cannabinoid receptor-2 is mediated by circulating and vascular cells in vivo.	Pubmed	0.0001648	1	0.0168	0.1943	2	2	CNR2,APOE
Pubmed	21297984	Human RSPO1/R-spondin1 is expressed during early ovary development and augments ?-catenin signaling.	Pubmed	0.0001648	1	0.0168	0.1943	2	2	CTNNB1,RSPO1
Pubmed	24723432	Lack of influence of DAT1 and DRD2 gene variants on antidepressant response in generalized anxiety disorder.	Pubmed	0.0001648	1	0.0168	0.1943	2	2	SLC6A3,DRD2
Pubmed	16512877	Extracellular matrix protein 1 inhibits the activity of matrix metalloproteinase 9 through high-affinity protein/protein interactions.	Pubmed	0.0001648	1	0.0168	0.1943	2	2	MMP9,ECM1
Pubmed	16996683	Association analysis of the paraoxonase-1 gene with Alzheimer's disease.	Pubmed	0.0001648	1	0.0168	0.1943	2	2	PON1,APOE
Pubmed	15926916	Up-regulation of beta2 and alpha7 subunit containing nicotinic acetylcholine receptors in mouse striatum at cellular level.	Pubmed	0.0001648	1	0.0168	0.1943	2	2	CHRNA7,CHRNB2
Pubmed	17027006	Interaction of TPPP/p25 protein with glyceraldehyde-3-phosphate dehydrogenase and their co-localization in Lewy bodies.	Pubmed	0.0001648	1	0.0168	0.1943	2	2	GAPDH,TPPP
Pubmed	23490134	Differential expression and tumor necrosis factor-mediated regulation of TNFRSF11b/osteoprotegerin production by human melanomas.	Pubmed	0.0001648	1	0.0168	0.1943	2	2	TNFRSF11B,TNFRSF1A
Pubmed	18079406	CX3CR1 deficiency impairs dendritic cell accumulation in arterial intima and reduces atherosclerotic burden.	Pubmed	0.0001648	1	0.0168	0.1943	2	2	APOE,CX3CR1
Pubmed	19115206	Down-modulation of keratin 8 phosphorylation levels by PRL-3 contributes to colorectal carcinoma progression.	Pubmed	0.0001648	1	0.0168	0.1943	2	2	KRT8,PTP4A3
Pubmed	24394417	Ankyrin-B regulates Cav2.1 and Cav2.2 channel expression and targeting.	Pubmed	0.0001648	1	0.0168	0.1943	2	2	CACNA1A,CACNA1B
Pubmed	11572855	Selective binding of collagen subtypes by integrin alpha 1I, alpha 2I, and alpha 10I domains.	Pubmed	0.0001648	1	0.0168	0.1943	2	2	ITGA10,ITGA1
Pubmed	7616606	Effects of carbonic anhydrase II (CAII) deficiency on CNS structure and function in the myelin-deficient CAII-deficient double mutant mouse.	Pubmed	0.0001648	1	0.0168	0.1943	2	2	MBP,CA2
Pubmed	24951635	Effect of APOE and CHRNA7 genotypes on the cognitive response to cholinesterase inhibitor treatment at different stages of Alzheimer's disease.	Pubmed	0.0001648	1	0.0168	0.1943	2	2	CHRNA7,APOE
Pubmed	19359600	Human paraoxonase gene cluster transgenic overexpression represses atherogenesis and promotes atherosclerotic plaque stability in ApoE-null mice.	Pubmed	0.0001648	1	0.0168	0.1943	2	2	PON1,APOE
Pubmed	22886582	Complement component 4 copy number variation and CYP21A2 genotype associations in patients with congenital adrenal hyperplasia due to 21-hydroxylase deficiency.	Pubmed	0.0001648	1	0.0168	0.1943	2	2	CYP21A2,C4A
Pubmed	22291029	Layer-specific modulation of the prefrontal cortex by nicotinic acetylcholine receptors.	Pubmed	0.0001648	1	0.0168	0.1943	2	2	CHRNA7,CHRNB2
Pubmed	19553453	Focal adhesion kinase acts downstream of EphB receptors to maintain mature dendritic spines by regulating cofilin activity.	Pubmed	0.0001648	1	0.0168	0.1943	2	2	EPHB2,PTK2
Pubmed	20221865	ApoE mimetic peptide reduces plasma lipid hydroperoxide content with a concomitant increase in HDL paraoxonase activity.	Pubmed	0.0001648	1	0.0168	0.1943	2	2	PON1,APOE
Pubmed	19187936	Regulation and possible role of endocannabinoids and related mediators in hypercholesterolemic mice with atherosclerosis.	Pubmed	0.0001648	1	0.0168	0.1943	2	2	CNR2,APOE
Pubmed	19761593	Influences of polymorphic variants of DRD2 and SLC6A3 genes, and their combinations on smoking in Polish population.	Pubmed	0.0001648	1	0.0168	0.1943	2	2	SLC6A3,DRD2
Pubmed	15559160	Apolipoprotein E and A-IV polymorphisms in ethnic Russians living in Estonia.	Pubmed	0.0001648	1	0.0168	0.1943	2	2	APOA4,APOE
Pubmed	28928239	The RNA-editing enzyme ADAR promotes lung adenocarcinoma migration and invasion by stabilizing	Pubmed	0.0001648	1	0.0168	0.1943	2	2	ADAR,PTK2
Pubmed	12708251	[Distribution of DRD4 and DAT1 alleles from dopaminergic system in a mixed Chilean population].	Pubmed	0.0001648	1	0.0168	0.1943	2	2	SLC6A3,DRD2
Pubmed	29291351	The deubiquitinating enzyme cylindromatosis mitigates nonalcoholic steatohepatitis.	Pubmed	0.0001648	1	0.0168	0.1943	2	2	CYLD,TRIM47
Pubmed	19065319	p66Shc deletion confers vascular protection in advanced atherosclerosis in hypercholesterolemic apolipoprotein E knockout mice.	Pubmed	0.0001648	1	0.0168	0.1943	2	2	SHC1,APOE
Pubmed	16027737	Paraoxonase gene variants are associated with autism in North America, but not in Italy: possible regional specificity in gene-environment interactions.	Pubmed	0.0001648	1	0.0168	0.1943	2	2	PON1,APOE
Pubmed	26994915	Apolipoprotein A-I and Paraoxonase-1 Are Potential Blood Biomarkers for Ischemic Stroke Diagnosis.	Pubmed	0.0001648	1	0.0168	0.1943	2	2	PON1,APOA1
Pubmed	21418511	Genome-wide association study identifies a single major locus contributing to survival into old age; the APOE locus revisited.	Pubmed	0.0001648	1	0.0168	0.1943	2	2	TOMM40,APOE
Pubmed	24867950	Directed expression of a chimeric type II keratin partially rescues keratin 5-null mice.	Pubmed	0.0001648	1	0.0168	0.1943	2	2	KRT5,KRT8
Pubmed	15238148	Direct interaction between the Lu/B-CAM adhesion glycoproteins and erythroid spectrin.	Pubmed	0.0001648	1	0.0168	0.1943	2	2	BCAM,EPB41
Pubmed	23690625	Fratricide of natural killer cells dressed with tumor-derived NKG2D ligand.	Pubmed	0.0001648	1	0.0168	0.1943	2	2	TYROBP,HCST
Pubmed	17696931	Apolipoprotein AI and apolipoprotein E mRNA expression in peripheral white blood cells from patients with orthotopic liver transplantation.	Pubmed	0.0001648	1	0.0168	0.1943	2	2	APOA1,APOE
Pubmed	20930148	Angiotensin-converting enzyme inhibition prevents the release of monocytes from their splenic reservoir in mice with myocardial infarction.	Pubmed	0.0001648	1	0.0168	0.1943	2	2	APOE,CX3CR1
Pubmed	28604387	Macrolides selectively inhibit mutant KCNJ5 potassium channels that cause aldosterone-producing adenoma.	Pubmed	0.0001648	1	0.0168	0.1943	2	2	KCNK5,KCNJ5
Pubmed	10073953	ApoA1 reduces free cholesterol accumulation in atherosclerotic lesions of ApoE-deficient mice transplanted with ApoE-expressing macrophages.	Pubmed	0.0001648	1	0.0168	0.1943	2	2	APOA1,APOE
Pubmed	18246469	Discrete roles of apoA-I and apoE in the biogenesis of HDL species: lessons learned from gene transfer studies in different mouse models.	Pubmed	0.0001648	1	0.0168	0.1943	2	2	APOA1,APOE
Pubmed	24334873	Apolipoprotein A-I protection against atherosclerosis is dependent on genetic background.	Pubmed	0.0001648	1	0.0168	0.1943	2	2	APOA1,APOE
Pubmed	20553853	Association of polymorphism of DNA repair gene XRCC1 with sporadic late-onset Alzheimer's disease and age of onset in elderly Han Chinese.	Pubmed	0.0001648	1	0.0168	0.1943	2	2	XRCC1,APOE
Pubmed	24685552	Concomitant alpha7 and beta2 nicotinic AChR subunit deficiency leads to impaired energy homeostasis and increased physical activity in mice.	Pubmed	0.0001648	1	0.0168	0.1943	2	2	CHRNA7,CHRNB2
Pubmed	16840715	Osteoprotegerin inactivation accelerates advanced atherosclerotic lesion progression and calcification in older ApoE-/- mice.	Pubmed	0.0001648	1	0.0168	0.1943	2	2	APOE,TNFRSF11B
Pubmed	26888969	Intracellular Wnt/Beta-Catenin Signaling Underlying 17beta-Estradiol-Induced Matrix Metalloproteinase 9 Expression in Human Endometriosis.	Pubmed	0.0001648	1	0.0168	0.1943	2	2	MMP9,CTNNB1
Pubmed	11827174	Transcriptional coordination of the genes encoding catalytic (CK2alpha) and regulatory (CK2beta) subunits of human protein kinase CK2.	Pubmed	0.0001648	1	0.0168	0.1943	2	2	CSNK2A1,CSNK2B
Pubmed	16339517	Silencing human NKG2D, DAP10, and DAP12 reduces cytotoxicity of activated CD8+ T cells and NK cells.	Pubmed	0.0001648	1	0.0168	0.1943	2	2	TYROBP,HCST
Pubmed	22694764	The absence of Complexin 3 and Complexin 4 differentially impacts the ON and OFF pathways in mouse retina.	Pubmed	0.0001648	1	0.0168	0.1943	2	2	CPLX4,CPLX3
Pubmed	22730326	p38? Mitogen-activated protein kinase signals through phosphorylating its phosphatase PTPH1 in regulating ras protein oncogenesis and stress response.	Pubmed	0.0001648	1	0.0168	0.1943	2	2	MAPK12,PTPN3
Pubmed	22359587	Mitochondria express ?7 nicotinic acetylcholine receptors to regulate Ca2+ accumulation and cytochrome c release: study on isolated mitochondria.	Pubmed	0.0001648	1	0.0168	0.1943	2	2	CHRNA7,CHRNB2
Pubmed	12107439	PKLR- GBA region shows almost complete linkage disequilibrium over 70 kb in a set of worldwide populations.	Pubmed	0.0001648	1	0.0168	0.1943	2	2	PKLR,GBA
Pubmed	22435397	Increased striatal dopamine transporter density in moderately severe old restless legs syndrome patients.	Pubmed	0.0001648	1	0.0168	0.1943	2	2	SLC6A3,DRD2
Pubmed	23572150	KCNN4 channels participate in the EMT induced by PRL-3 in colorectal cancer.	Pubmed	0.0001648	1	0.0168	0.1943	2	2	KCNN4,PTP4A3
Pubmed	16636500	RECS1 is a negative regulator of matrix metalloproteinase-9 production and aged RECS1 knockout mice are prone to aortic dilation.	Pubmed	0.0001648	1	0.0168	0.1943	2	2	MMP9,TMBIM1
Pubmed	19125160	Examination of the current top candidate genes for AD in a genome-wide association study.	Pubmed	0.0001648	1	0.0168	0.1943	2	2	TOMM40,APOE
Pubmed	21803501	Cerebrospinal fluid cortisol concentrations in healthy elderly are affected by both APOE and TOMM40 variants.	Pubmed	0.0001648	1	0.0168	0.1943	2	2	TOMM40,APOE
Pubmed	12551902	Signaling between focal adhesion kinase and trio.	Pubmed	0.0001648	1	0.0168	0.1943	2	2	TRIO,PTK2
Pubmed	12633754	Paraoxonase (PON1) deficiency is associated with increased macrophage oxidative stress: studies in PON1-knockout mice.	Pubmed	0.0001648	1	0.0168	0.1943	2	2	PON1,APOE
Pubmed	15793777	[The apolipoprotein E-CI-CII gene cluster polymorphisms and coronary artery disease].	Pubmed	0.0001648	1	0.0168	0.1943	2	2	APOC1,APOE
Pubmed	19332111	Functional evolution of the microfibril-associated glycoproteins.	Pubmed	0.0001648	1	0.0168	0.1943	2	2	MFAP2,MFAP5
Pubmed	18553059	Examination of transcript amounts and activity of protein kinase CK2 in muscle lysates of different types of human muscle pathologies.	Pubmed	0.0001648	1	0.0168	0.1943	2	2	CSNK2A1,CSNK2B
Pubmed	14732864	Stress-induced cigarette craving: effects of the DRD2 TaqI RFLP and SLC6A3 VNTR polymorphisms.	Pubmed	0.0001648	1	0.0168	0.1943	2	2	SLC6A3,DRD2
Pubmed	26342565	DRD2 and SLC6A3 moderate impact of maternal depressive symptoms on infant cortisol.	Pubmed	0.0001648	1	0.0168	0.1943	2	2	SLC6A3,DRD2
Pubmed	16288923	Correlation of gene and protein structures in the FXYD family proteins.	Pubmed	0.0001648	1	0.0168	0.1943	2	2	FXYD1,FXYD3
Pubmed	23096223	High serum apolipoprotein E determines hypertriglyceridemic dyslipidemias, coronary disease and apoA-I dysfunctionality.	Pubmed	0.0001648	1	0.0168	0.1943	2	2	APOA1,APOE
Pubmed	20809954	Enrichment and differential targeting of complexins 3 and 4 in ribbon-containing sensory neurons during zebrafish development.	Pubmed	0.0001648	1	0.0168	0.1943	2	2	CPLX4,CPLX3
Pubmed	19304505	[Single nucleotide polymorphisms of DAT and DRD(2) genes in Han Chinese population and their association with stuttering].	Pubmed	0.0001648	1	0.0168	0.1943	2	2	SLC6A3,DRD2
Pubmed	25963142	The microfibril-associated glycoproteins (MAGPs) and the microfibrillar niche.	Pubmed	0.0001648	1	0.0168	0.1943	2	2	MFAP2,MFAP5
Pubmed	17470777	Long-term effects of chronic nicotine exposure on brain nicotinic receptors.	Pubmed	0.0001648	1	0.0168	0.1943	2	2	CHRNA7,CHRNB2
Pubmed	23327868	[Expressions and significances of CRABPII and E-FABP in non-small cell lung cancer].	Pubmed	0.0001648	1	0.0168	0.1943	2	2	FABP5,CRABP2
Pubmed	27758766	Fzd7 (Frizzled-7) Expressed by Endothelial Cells Controls Blood Vessel Formation Through Wnt/?-Catenin Canonical Signaling.	Pubmed	0.0001648	1	0.0168	0.1943	2	2	FZD7,CTNNB1
Pubmed	26621503	HDAC9, TWIST1 and FERD3L gene expression in asymptomatic stable and unstable carotid plaques.	Pubmed	0.0001648	1	0.0168	0.1943	2	2	TWIST1,HDAC9
Pubmed	25961718	Resveratrol-Induced Vascular Progenitor Differentiation towards Endothelial Lineage via MiR-21/Akt/?-Catenin Is Protective in Vessel Graft Models.	Pubmed	0.0001648	1	0.0168	0.1943	2	2	APOE,CTNNB1
Pubmed	28572157	Characterization of the oligomeric states of the CK2 ?2?2 holoenzyme in solution.	Pubmed	0.0001648	1	0.0168	0.1943	2	2	CSNK2A1,CSNK2B
Pubmed	22227125	Cannabinoid receptor CB2 protects against balloon-induced neointima formation.	Pubmed	0.0001648	1	0.0168	0.1943	2	2	CNR2,APOE
Pubmed	25117703	Dietary squalene increases high density lipoprotein-cholesterol and paraoxonase 1 and decreases oxidative stress in mice.	Pubmed	0.0001648	1	0.0168	0.1943	2	2	APOA1,APOE
Pubmed	15507493	Association of late-onset Alzheimer's disease with genetic variation in multiple members of the GAPD gene family.	Pubmed	0.0001648	1	0.0168	0.1943	2	2	GAPDH,GAPDHS
Pubmed	19386896	Aberrant function and structure of retinal ribbon synapses in the absence of complexin 3 and complexin 4.	Pubmed	0.0001648	1	0.0168	0.1943	2	2	CPLX4,CPLX3
Pubmed	15123711	Regulation of the mouse epithelial Ca2(+) channel TRPV6 by the Ca(2+)-sensor calmodulin.	Pubmed	0.0001648	1	0.0168	0.1943	2	2	TRPV6,TRPV5
Pubmed	19140341	[TRPV5 and TRPV6 calcium channels in human T cells].	Pubmed	0.0001648	1	0.0168	0.1943	2	2	TRPV6,TRPV5
Pubmed	22682503	Additive effects of the dopamine D2 receptor and dopamine transporter genes on the error-related negativity in young children.	Pubmed	0.0001648	1	0.0168	0.1943	2	2	SLC6A3,DRD2
Pubmed	27448963	CK2 blockade causes MPNST cell apoptosis and promotes degradation of ?-catenin.	Pubmed	0.0001648	1	0.0168	0.1943	2	2	CSNK2A1,CTNNB1
Pubmed	23522842	TOMM40 and APOE common genetic variants are not Parkinson's disease risk factors.	Pubmed	0.0001648	1	0.0168	0.1943	2	2	TOMM40,APOE
Pubmed	12138085	Carbonic anhydrase II binds to and enhances activity of the Na+/H+ exchanger.	Pubmed	0.0001648	1	0.0168	0.1943	2	2	SLC9A1,CA2
Pubmed	15229055	Interacting effects of genetic predisposition and depression on adolescent smoking progression.	Pubmed	0.0001648	1	0.0168	0.1943	2	2	SLC6A3,DRD2
Pubmed	18430993	Multiple SNPs within and surrounding the apolipoprotein E gene influence cerebrospinal fluid apolipoprotein E protein levels.	Pubmed	0.0001648	1	0.0168	0.1943	2	2	TOMM40,APOE
Pubmed	19664686	Potential association of DRD2 and DAT1 genetic variation with heroin dependence.	Pubmed	0.0001648	1	0.0168	0.1943	2	2	SLC6A3,DRD2
Pubmed	17136517	beta2 subunit-containing nicotinic receptors mediate the enhancing effect of nicotine on trace cued fear conditioning in C57BL/6 mice.	Pubmed	0.0001648	1	0.0168	0.1943	2	2	CHRNA7,CHRNB2
Pubmed	28108637	TOMM40'523 variant and cognitive decline in older persons with APOE ?3/3 genotype.	Pubmed	0.0001648	1	0.0168	0.1943	2	2	TOMM40,APOE
Pubmed	16772172	Hierarchical control of dopamine neuron-firing patterns by nicotinic receptors.	Pubmed	0.0001648	1	0.0168	0.1943	2	2	CHRNA7,CHRNB2
Pubmed	21836018	Nicotinic acetylcholine receptor ?2 subunits in the medial prefrontal cortex control attention.	Pubmed	0.0001648	1	0.0168	0.1943	2	2	CHRNA7,CHRNB2
Pubmed	29527566	Dopamine D2 Receptors in Dopaminergic Neurons Modulate Performance in a Reversal Learning Task in Mice.	Pubmed	0.0001648	1	0.0168	0.1943	2	2	SLC6A3,DRD2
Pubmed	18824508	The interaction of CK2alpha and CK2beta, the subunits of protein kinase CK2, requires CK2beta in a preformed conformation and is enthalpically driven.	Pubmed	0.0001648	1	0.0168	0.1943	2	2	CSNK2A1,CSNK2B
Pubmed	28572914	Sex differences in the development of vascular and renal lesions in mice with a simultaneous deficiency of	Pubmed	0.0001648	1	0.0168	0.1943	2	2	ITGA8,APOE
Pubmed	17526637	D2 dopamine receptor gene haplotypes and their influence on alcohol and tobacco consumption magnitude in alcohol-dependent individuals.	Pubmed	0.0001648	1	0.0168	0.1943	2	2	SLC6A3,DRD2
Pubmed	11470154	Characterization of two novel human small heat shock proteins: protein kinase-related HspB8 and testis-specific HspB9.	Pubmed	0.0001648	1	0.0168	0.1943	2	2	HSPB8,HSPB9
Pubmed	751643	Esterase 13, a new mouse esterase locus with recessive expression and its genetic location on chromosome 9.	Pubmed	0.0001648	1	0.0168	0.1943	2	2	ME1,ANPEP
Pubmed	24736233	Secretion of IL-16 through TNFR1 and calpain-caspase signaling contributes to MRSA pneumonia.	Pubmed	0.0001648	1	0.0168	0.1943	2	2	IL16,TNFRSF1A
Pubmed	21407247	Effect of walnut-enriched meat on the relationship between VCAM, ICAM, and LTB4 levels and PON-1 activity in ApoA4 360 and PON-1 allele carriers at increased cardiovascular risk.	Pubmed	0.0001648	1	0.0168	0.1943	2	2	PON1,APOA4
Pubmed	19590515	Association between dopaminergic genes (SLC6A3 and DRD2) and stuttering among Han Chinese.	Pubmed	0.0001648	1	0.0168	0.1943	2	2	SLC6A3,DRD2
Pubmed	11719848	Single-channel activities of the human epithelial Ca2+ transport proteins CaT1 and CaT2.	Pubmed	0.0001648	1	0.0168	0.1943	2	2	TRPV6,TRPV5
Pubmed	22354706	The TRPV5/6 calcium channels contain multiple calmodulin binding sites with differential binding properties.	Pubmed	0.0001648	1	0.0168	0.1943	2	2	TRPV6,TRPV5
Pubmed	20477910	Dopamine D2 receptor signaling modulates mutant ataxin-1 S776 phosphorylation and aggregation.	Pubmed	0.0001648	1	0.0168	0.1943	2	2	ATXN1,DRD2
Pubmed	20145290	Association of apolipoproteins e4 and c1 with onset age and memory: a study of sporadic Alzheimer disease in Taiwan.	Pubmed	0.0001648	1	0.0168	0.1943	2	2	APOC1,APOE
Pubmed	27335398	Functional Roles of Complexin3 and Complexin4 at Mouse Photoreceptor Ribbon Synapses.	Pubmed	0.0001648	1	0.0168	0.1943	2	2	CPLX4,CPLX3
Pubmed	25304313	No evidence of association between variant rs2075650 in lipid metabolism-related locus APOE/TOMM40 and advanced age-related macular degeneration in Han Chinese population.	Pubmed	0.0001648	1	0.0168	0.1943	2	2	TOMM40,APOE
Pubmed	24439168	The cis-regulatory effect of an Alzheimer's disease-associated poly-T locus on expression of TOMM40 and apolipoprotein E genes.	Pubmed	0.0001648	1	0.0168	0.1943	2	2	TOMM40,APOE
Pubmed	12401887	Evidence for differential effects of apoE3 and apoE4 on HDL metabolism.	Pubmed	0.0001648	1	0.0168	0.1943	2	2	APOA1,APOE
Pubmed	12700239	CK2 phosphorylation of the armadillo repeat region of beta-catenin potentiates Wnt signaling.	Pubmed	0.0001648	1	0.0168	0.1943	2	2	CSNK2A1,CTNNB1
Pubmed	25237117	Dopamine DRD2/ANKK1 Taq1A and DAT1 VNTR polymorphisms are associated with a cognitive flexibility profile in pathological gamblers.	Pubmed	0.0001648	1	0.0168	0.1943	2	2	SLC6A3,DRD2
Pubmed	24849661	The influence of genetic variants on striatal dopamine transporter and D2 receptor binding after TBI.	Pubmed	0.0001648	1	0.0168	0.1943	2	2	SLC6A3,DRD2
Pubmed	16128586	High affinity, stability, and lactonase activity of serum paraoxonase PON1 anchored on HDL with ApoA-I.	Pubmed	0.0001648	1	0.0168	0.1943	2	2	PON1,APOA1
Pubmed	11827168	Response of cancer cells to molecular interruption of the CK2 signal.	Pubmed	0.0001648	1	0.0168	0.1943	2	2	CSNK2A1,CSNK2B
Pubmed	17442899	Expression of tumor necrosis factor receptor-1 in arterial wall cells promotes atherosclerosis.	Pubmed	0.0001648	1	0.0168	0.1943	2	2	APOE,TNFRSF1A
Pubmed	11478940	Expression of human apolipoprotein A-I/C-III/A-IV gene cluster in mice reduces atherogenesis in response to a high fat-high cholesterol diet.	Pubmed	0.0001648	1	0.0168	0.1943	2	2	APOA1,APOA4
Pubmed	19295174	Endogenous expression of TRPV5 and TRPV6 calcium channels in human leukemia K562 cells.	Pubmed	0.0001648	1	0.0168	0.1943	2	2	TRPV6,TRPV5
Pubmed	16901939	Nicotinic modulation of network and synaptic transmission in the immature hippocampus investigated with genetically modified mice.	Pubmed	0.0001648	1	0.0168	0.1943	2	2	CHRNA7,CHRNB2
Pubmed	15050706	Expression analysis of P/Q-type Ca2+ channel alpha 1A subunit mRNA in olfactory mitral cell in N-type Ca2+ channel alpha 1B subunit gene-deficient mice.	Pubmed	0.0001648	1	0.0168	0.1943	2	2	CACNA1A,CACNA1B
Pubmed	14570538	Effects of dopamine transporter and receptor polymorphisms on smoking cessation in a bupropion clinical trial.	Pubmed	0.0001648	1	0.0168	0.1943	2	2	SLC6A3,DRD2
Pubmed	20872564	Matrix metalloproteinase-9 and paraoxonase 1 Q/R192 gene polymorphisms and the risk of coronary artery stenosis in Iranian subjects.	Pubmed	0.0001648	1	0.0168	0.1943	2	2	MMP9,PON1
Pubmed	24504172	Collagen triple helix repeat containing 1 (CTHRC1) acts via ERK-dependent induction of MMP9 to promote invasion of colorectal cancer cells.	Pubmed	0.0001648	1	0.0168	0.1943	2	2	CTHRC1,MMP9
Pubmed	12954211	The presence of the casein kinase II phosphorylation sites of Vpu enhances the CD4(+) T cell loss caused by the simian-human immunodeficiency virus SHIV(KU-lbMC33) in pig-tailed macaques.	Pubmed	0.0001648	1	0.0168	0.1943	2	2	CSNK2B,CD4
Pubmed	26975630	NLRC5 regulates cell proliferation, migration and invasion in hepatocellular carcinoma by targeting the Wnt/?-catenin signaling pathway.	Pubmed	0.0001648	1	0.0168	0.1943	2	2	NLRC5,CTNNB1
Pubmed	25742474	Hairy/enhancer-of-split related with YRPW motif protein 1 promotes osteosarcoma metastasis via matrix metallopeptidase 9 expression.	Pubmed	0.0001648	1	0.0168	0.1943	2	2	MMP9,HEY1
Pubmed	12574114	Homo- and heterotetrameric architecture of the epithelial Ca2+ channels TRPV5 and TRPV6.	Pubmed	0.0001648	1	0.0168	0.1943	2	2	TRPV6,TRPV5
Pubmed	18398670	Synergistic effect between apolipoprotein E and apolipoprotein A1 gene polymorphisms in the risk for coronary artery disease.	Pubmed	0.0001648	1	0.0168	0.1943	2	2	APOA1,APOE
Pubmed	23968883	Human TRPV5 and TRPV6: key players in cadmium and zinc toxicity.	Pubmed	0.0001648	1	0.0168	0.1943	2	2	TRPV6,TRPV5
Pubmed	24631336	Synaptic pattern of nicotinic acetylcholine receptor ?7 and ?2 subunits on the direction-selective retinal ganglion cells in the postnatal mouse retina.	Pubmed	0.0001648	1	0.0168	0.1943	2	2	CHRNA7,CHRNB2
Pubmed	17631639	The antibody MAB8051 directed against osteoprotegerin detects carbonic anhydrase II: implications for association studies with human cancers.	Pubmed	0.0001648	1	0.0168	0.1943	2	2	CA2,TNFRSF11B
Pubmed	21263069	Activation receptor-induced tolerance of mature NK cells in vivo requires signaling through the receptor and is reversible.	Pubmed	0.0001648	1	0.0168	0.1943	2	2	TYROBP,HCST
Pubmed	23426690	Stable respiratory activity requires both P/Q-type and N-type voltage-gated calcium channels.	Pubmed	0.0001648	1	0.0168	0.1943	2	2	CACNA1A,CACNA1B
Pubmed	24284889	Activated hepatic stellate cells promote hepatocellular carcinoma cell migration and invasion via the activation of FAK-MMP9 signaling.	Pubmed	0.0001648	1	0.0168	0.1943	2	2	MMP9,PTK2
Pubmed	22089642	Functional analysis of APOE locus genetic variation implicates regional enhancers in the regulation of both TOMM40 and APOE.	Pubmed	0.0001648	1	0.0168	0.1943	2	2	TOMM40,APOE
Pubmed	23201136	Identification of a functional proprotein convertase cleavage site in microfibril-associated glycoprotein 2.	Pubmed	0.0001648	1	0.0168	0.1943	2	2	MFAP2,MFAP5
Pubmed	17190598	ATAXIN-1 interacts with the repressor Capicua in its native complex to cause SCA1 neuropathology.	Pubmed	0.0001648	1	0.0168	0.1943	2	2	ATXN1,CIC
Pubmed	1851800	CD4-mediated stimulation of human eosinophils: lymphocyte chemoattractant factor and other CD4-binding ligands elicit eosinophil migration.	Pubmed	0.0001648	1	0.0168	0.1943	2	2	IL16,CD4
Pubmed	8184654	Expression of casein kinase 2 during mouse embryogenesis.	Pubmed	0.0001648	1	0.0168	0.1943	2	2	CSNK2A1,CSNK2B
Pubmed	12678662	Apolipoprotein E and apolipoprotein CI polymorphisms in the Czech population: almost complete linkage disequilibrium of the less frequent alleles of both polymorphisms.	Pubmed	0.0001648	1	0.0168	0.1943	2	2	APOC1,APOE
Pubmed	16492672	Microfibrillar proteins MAGP-1 and MAGP-2 induce Notch1 extracellular domain dissociation and receptor activation.	Pubmed	0.0001648	1	0.0168	0.1943	2	2	MFAP2,MFAP5
Pubmed	15094479	Frequency and transmission of glutamate receptors GRIK2 and GRIK3 polymorphisms in patients with obsessive compulsive disorder.	Pubmed	0.0001648	1	0.0168	0.1943	2	2	GRIK2,GRIK3
Pubmed	29443542	Comprehensive Analysis of DNA Methylation and Gene Expression Datasets Identified MMP9 and TWIST1 as Important Pathogenic Genes of Lung Adenocarcinoma.	Pubmed	0.0001648	1	0.0168	0.1943	2	2	TWIST1,MMP9
Pubmed	22010213	Molecular determinants of retinoic acid sensitivity in pancreatic cancer.	Pubmed	0.0001648	1	0.0168	0.1943	2	2	FABP5,CRABP2
Pubmed	9325076	Apolipoprotein E and apolipoprotein A-1 knock-out mice readily develop amyloid A protein amyloidosis.	Pubmed	0.0001648	1	0.0168	0.1943	2	2	APOA1,APOE
Pubmed	14634006	Direct regulation of microtubule dynamics by protein kinase CK2.	Pubmed	0.0001648	1	0.0168	0.1943	2	2	CSNK2A1,CSNK2B
Pubmed	17638904	Blockade of beta-catenin signaling by plant flavonoid apigenin suppresses prostate carcinogenesis in TRAMP mice.	Pubmed	0.0001648	1	0.0168	0.1943	2	2	CTNNB1,TNFRSF25
Pubmed	12951361	Testing the role of apoA-I, HDL, and cholesterol efflux in the atheroprotective action of low-level apoE expression.	Pubmed	0.0001648	1	0.0168	0.1943	2	2	APOA1,APOE
Pubmed	22298898	Activation of ?-catenin signaling in androgen receptor-negative prostate cancer cells.	Pubmed	0.0001648	1	0.0168	0.1943	2	2	CTNNB1,HAS2
Pubmed	20688958	Induction of FPN1 transcription by MTF-1 reveals a role for ferroportin in transition metal efflux.	Pubmed	0.0001648	1	0.0168	0.1943	2	2	SLC40A1,MTF1
Pubmed	24675423	Melittin suppresses EGF-induced cell motility and invasion by inhibiting PI3K/Akt/mTOR signaling pathway in breast cancer cells.	Pubmed	0.0001648	1	0.0168	0.1943	2	2	MMP9,PTK2
Pubmed	19739106	The association of the dopamine transporter gene and the dopamine receptor 2 gene with delirium, a meta-analysis.	Pubmed	0.0001648	1	0.0168	0.1943	2	2	SLC6A3,DRD2
Pubmed	19433657	Association of glucocerebrosidase mutations with dementia with lewy bodies.	Pubmed	0.0001648	1	0.0168	0.1943	2	2	APOE,GBA
Pubmed	17936795	Apolipoprotein C1 and apolipoprotein E are differentially expressed in atheroma of the carotid and femoral artery.	Pubmed	0.0001648	1	0.0168	0.1943	2	2	APOC1,APOE
Pubmed	2055457	A mutation resulting in increased triosephosphate isomerase activity in Mus musculus.	Pubmed	0.0001648	1	0.0168	0.1943	2	2	GAPDH,TPI1
Pubmed	16569110	An association between the DAT1 polymorphism and smoking behavior in young adults from the National Longitudinal Study of Adolescent Health.	Pubmed	0.0001648	1	0.0168	0.1943	2	2	SLC6A3,DRD2
Pubmed	14608382	Deletion of beta-catenin impairs T cell development.	Pubmed	0.0001648	1	0.0168	0.1943	2	2	CTNNB1,CD4
Pubmed	23183136	TOMM40 intron 6 poly-T length, age at onset, and neuropathology of AD in individuals with APOE ?3/?3.	Pubmed	0.0001648	1	0.0168	0.1943	2	2	TOMM40,APOE
Pubmed	19596613	Localization of X-ray cross complementing gene 1 protein in the nuclear matrix is controlled by casein kinase II-dependent phosphorylation in response to oxidative damage.	Pubmed	0.0001648	1	0.0168	0.1943	2	2	XRCC1,CSNK2A1
Pubmed	24291031	Association of APOE, GCPII and MMP9 polymorphisms with common diseases and lipid levels in an older adult/elderly cohort.	Pubmed	0.0001648	1	0.0168	0.1943	2	2	MMP9,APOE
Pubmed	26207029	Appropriate expression of Ube2C and Ube2S controls the progression of the first meiotic division.	Pubmed	0.0001648	1	0.0168	0.1943	2	2	UBE2S,UBE2C
Pubmed	24086483	Identification of the mRNA expression status of the dopamine D2 receptor and dopamine transporter in peripheral blood lymphocytes of schizophrenia patients.	Pubmed	0.0001648	1	0.0168	0.1943	2	2	SLC6A3,DRD2
Pubmed	16806200	Discrimination between the activity of protein kinase CK2 holoenzyme and its catalytic subunits.	Pubmed	0.0001648	1	0.0168	0.1943	2	2	CSNK2A1,CSNK2B
Pubmed	17823288	p25alpha relocalizes in oligodendroglia from myelin to cytoplasmic inclusions in multiple system atrophy.	Pubmed	0.0001648	1	0.0168	0.1943	2	2	MBP,TPPP
Pubmed	19926456	Further association analysis of chr 6q22-24 suggests a role of IL-20RA polymorphisms in psoriasis.	Pubmed	0.0001648	1	0.0168	0.1943	2	2	IL20RA,IL22RA2
Pubmed	8635594	Identification of a cryptic protein kinase CK2 phosphorylation site in human complement protease Clr, and its use to probe intramolecular interaction.	Pubmed	0.0001648	1	0.0168	0.1943	2	2	CSNK2A1,C1R
Pubmed	28606623	The interaction between alpha 7 nicotinic acetylcholine receptor and nuclear peroxisome proliferator-activated receptor-? represents a new antinociceptive signaling pathway in mice.	Pubmed	0.0001648	1	0.0168	0.1943	2	2	CHRNA7,CHRNB2
Pubmed	16475831	A novel carbonic anhydrase II binding site regulates NHE1 activity.	Pubmed	0.0001648	1	0.0168	0.1943	2	2	SLC9A1,CA2
Pubmed	25703783	Genes determining the severity of cerebral palsy: the role of single nucleotide polymorphisms on the amount and structure of apolipoprotein E.	Pubmed	0.0001648	1	0.0168	0.1943	2	2	TOMM40,APOE
Pubmed	1375514	Expression of a glyceraldehyde 3-phosphate dehydrogenase gene specific to mouse spermatogenic cells.	Pubmed	0.0001648	1	0.0168	0.1943	2	2	GAPDH,GAPDHS
Pubmed	23102119	Longitudinal modeling of cognitive aging and the TOMM40 effect.	Pubmed	0.0001648	1	0.0168	0.1943	2	2	TOMM40,APOE
Pubmed	23340505	Dopamine transporter DAT and receptor DRD2 variants affect risk of lethal cocaine abuse: a gene-gene-environment interaction.	Pubmed	0.0001648	1	0.0168	0.1943	2	2	SLC6A3,DRD2
Pubmed	16585583	Transcriptional regulation of CD4 gene expression by T cell factor-1/beta-catenin pathway.	Pubmed	0.0001648	1	0.0168	0.1943	2	2	CTNNB1,CD4
Pubmed	21825236	Association and expression analyses with single-nucleotide polymorphisms in TOMM40 in Alzheimer disease.	Pubmed	0.0001648	1	0.0168	0.1943	2	2	TOMM40,APOE
Pubmed	20817832	Inhibition of collar-induced carotid atherosclerosis by recombinant apoA-I cysteine mutants in apoE-deficient mice.	Pubmed	0.0001648	1	0.0168	0.1943	2	2	APOA1,APOE
Pubmed	9416903	Effects of adenovirus-mediated human apo A-I gene transfer on neointima formation after endothelial denudation in apo E-deficient mice.	Pubmed	0.0001648	1	0.0168	0.1943	2	2	APOA1,APOE
Pubmed	9771707	Inversin, a novel gene in the vertebrate left-right axis pathway, is partially deleted in the inv mouse.	Pubmed	0.0001648	1	0.0168	0.1943	2	2	INVS,TEX10
Pubmed	17280645	Genetic association between polymorphisms of Pen2 gene and late onset Alzheimer's disease in the North Chinese population.	Pubmed	0.0001648	1	0.0168	0.1943	2	2	APOE,PSENEN
Pubmed	23128675	Genetic analysis of polymorphisms in dopamine receptor and transporter genes for association with smoking among cancer patients.	Pubmed	0.0001648	1	0.0168	0.1943	2	2	SLC6A3,DRD2
Pubmed	24751108	RNA sequencing identifies novel markers of non-small cell lung cancer.	Pubmed	0.0001648	1	0.0168	0.1943	2	2	CBX3,CRABP2
Pubmed	20197062	Interleukin-6 receptor gene polymorphisms were associated with sporadic Alzheimer's disease in Chinese Han.	Pubmed	0.0001648	1	0.0168	0.1943	2	2	APOE,IL6R
Pubmed	27297501	Ehlers-Danlos Syndrome Caused by Biallelic TNXB Variants in Patients with Congenital Adrenal Hyperplasia.	Pubmed	0.0001648	1	0.0168	0.1943	2	2	CYP21A2,TNXB
Pubmed	29626583	Abnormalities in the relationship of paraoxonase 1 with HDL and apolipoprotein A1 and their possible connection to HDL dysfunctionality in type 2 diabetes.	Pubmed	0.0001648	1	0.0168	0.1943	2	2	PON1,APOA1
Pubmed	28582390	Polymorphisms in dopaminergic system genes; association with criminal behavior and self-reported aggression in violent prison inmates from Pakistan.	Pubmed	0.0001648	1	0.0168	0.1943	2	2	SLC6A3,DRD2
Pubmed	15662027	Lesion development and response to immunization reveal a complex role for CD4 in atherosclerosis.	Pubmed	0.0001648	1	0.0168	0.1943	2	2	APOE,CD4
Pubmed	12608057	[Interaction of human apolipoprotein AI and HIV-1 envelope proteins with the native and recombinant CD4 receptors].	Pubmed	0.0001648	1	0.0168	0.1943	2	2	APOA1,CD4
Pubmed	18057084	Alpha7 nicotinic acetylcholine receptor gene and reduced risk of Alzheimer's disease.	Pubmed	0.0001648	1	0.0168	0.1943	2	2	CHRNA7,APOE
Pubmed	18078954	Structural basis for the interaction between focal adhesion kinase and CD4.	Pubmed	0.0001648	1	0.0168	0.1943	2	2	PTK2,CD4
Pubmed	21135238	Non-cell-autonomous factor induces the transition from excitatory to inhibitory GABA signaling in retina independent of activity.	Pubmed	0.0001648	1	0.0168	0.1943	2	2	CHRNA7,CHRNB2
Pubmed	24780147	Association of dopamine gene variants, emotion dysregulation and ADHD in autism spectrum disorder.	Pubmed	0.0001648	1	0.0168	0.1943	2	2	SLC6A3,DRD2
Pubmed	22402133	Naturally occurring variant of mouse apolipoprotein A-I alters the lipid and HDL association properties of the protein.	Pubmed	0.0001648	1	0.0168	0.1943	2	2	APOA1,APOE
Pubmed	12600915	Decreased atherosclerotic lesion formation in CX3CR1/apolipoprotein E double knockout mice.	Pubmed	0.0001648	1	0.0168	0.1943	2	2	APOE,CX3CR1
Pubmed	24370779	Identification of rare genetic variants in novel loci associated with Paget's disease of bone.	Pubmed	0.0001648	1	0.0168	0.1943	2	2	CTHRC1,DCSTAMP
Pubmed	23118226	Apolipoproteins and apolipoprotein mimetic peptides modulate phagocyte trafficking through chemotactic activity.	Pubmed	0.0001648	1	0.0168	0.1943	2	2	APOA1,APOE
Pubmed	17015754	Triosephosphate isomerase- and glyceraldehyde-3-phosphate dehydrogenase-reactive autoantibodies in the cerebrospinal fluid of patients with multiple sclerosis.	Pubmed	0.0001648	1	0.0168	0.1943	2	2	GAPDH,TPI1
Pubmed	24592736	[The functional characteristics oF TRPV5 and TRPV6 channels in normal and transformed human blood lymphocytes].	Pubmed	0.0001648	1	0.0168	0.1943	2	2	TRPV6,TRPV5
Pubmed	14970199	Megakaryoblastic leukemia factor-1 transduces cytoskeletal signals and induces smooth muscle cell differentiation from undifferentiated embryonic stem cells.	Pubmed	0.0001648	1	0.0168	0.1943	2	2	MRTFA,MYOCD
Pubmed	25988806	A native interactor scaffolds and stabilizes toxic ATAXIN-1 oligomers in SCA1.	Pubmed	0.0001648	1	0.0168	0.1943	2	2	ATXN1,CIC
Pubmed	11055796	Effect of apolipoprotein E polymorphism and apolipoprotein A-1 gene promoter polymorphism on lipid parameters and premature coronary artery disease.	Pubmed	0.0001648	1	0.0168	0.1943	2	2	APOA1,APOE
Pubmed	14705977	Association between apolipoprotein CI HpaI polymorphism and sporadic Alzheimer's disease in Chinese.	Pubmed	0.0001648	1	0.0168	0.1943	2	2	APOC1,APOE
Pubmed	28192395	Cadherins mediate cocaine-induced synaptic plasticity and behavioral conditioning.	Pubmed	0.0001648	1	0.0168	0.1943	2	2	SLC6A3,CTNNB1
Pubmed	16705151	Age-dependent alterations in Ca2+ homeostasis: role of TRPV5 and TRPV6.	Pubmed	0.0001648	1	0.0168	0.1943	2	2	TRPV6,TRPV5
Pubmed	16014973	A new common integration site, Int7, for the mouse mammary tumor virus in mouse mammary tumors identifies a gene whose product has furin-like and thrombospondin-like sequences.	Pubmed	0.0001648	1	0.0168	0.1943	2	2	RSPO2,EIF3E
Pubmed	25746001	ECM1 regulates tumor metastasis and CSC-like property through stabilization of ?-catenin.	Pubmed	0.0001648	1	0.0168	0.1943	2	2	CTNNB1,ECM1
Pubmed	25746000	MKL1 potentiates lung cancer cell migration and invasion by epigenetically activating MMP9 transcription.	Pubmed	0.0001648	1	0.0168	0.1943	2	2	MMP9,MRTFA
Pubmed	22699919	Induction of dendritic spines by ?2-containing nicotinic receptors.	Pubmed	0.0001648	1	0.0168	0.1943	2	2	CHRNA7,CHRNB2
Pubmed	27708220	Myocardin-related transcription factor A (MRTF-A) activity-dependent cell adhesion is correlated to focal adhesion kinase (FAK) activity.	Pubmed	0.0001648	1	0.0168	0.1943	2	2	MRTFA,PTK2
Pubmed	11549322	Structural conservation of the genes encoding CaT1, CaT2, and related cation channels.	Pubmed	0.0001648	1	0.0168	0.1943	2	2	TRPV6,TRPV5
Pubmed	10748217	Combined serum paraoxonase knockout/apolipoprotein E knockout mice exhibit increased lipoprotein oxidation and atherosclerosis.	Pubmed	0.0001648	1	0.0168	0.1943	2	2	PON1,APOE
Pubmed	20332238	PTPH1 dephosphorylates and cooperates with p38gamma MAPK to increase ras oncogenesis through PDZ-mediated interaction.	Pubmed	0.0001648	1	0.0168	0.1943	2	2	MAPK12,PTPN3
Pubmed	12077127	Fast and slow inactivation kinetics of the Ca2+ channels ECaC1 and ECaC2 (TRPV5 and TRPV6). Role of the intracellular loop located between transmembrane segments 2 and 3.	Pubmed	0.0001648	1	0.0168	0.1943	2	2	TRPV6,TRPV5
Pubmed	16472776	Identification of integrin alpha1 as an interacting protein of protein tyrosine phosphatase PRL-3.	Pubmed	0.0001648	1	0.0168	0.1943	2	2	ITGA1,PTP4A3
Pubmed	28234900	Role of the CX3C chemokine receptor CX3CR1 in the pathogenesis of atherosclerosis after aortic transplantation.	Pubmed	0.0001648	1	0.0168	0.1943	2	2	APOE,CX3CR1
Pubmed	15031287	Non-fibrillar components of amyloid deposits mediate the self-association and tangling of amyloid fibrils.	Pubmed	0.0001648	1	0.0168	0.1943	2	2	APCS,APOC2
Pubmed	16253349	The role of nicotinic acetylcholine receptors in lymphocyte development.	Pubmed	0.0001648	1	0.0168	0.1943	2	2	CHRNA7,CHRNB2
Pubmed	3170585	Isolation and complete sequence of a functional human glyceraldehyde-3-phosphate dehydrogenase gene.	Pubmed	0.0001648	1	0.0168	0.1943	2	2	GAPDH,GAPDHS
Pubmed	22863720	Elevated circulating osteoprotegerin and reduced matrix-metalloprotease-9 in post-menopausal women with chronic Hepatitis C virus infection.	Pubmed	0.0001648	1	0.0168	0.1943	2	2	MMP9,TNFRSF11B
Pubmed	12462973	The role of structural and functional homology between human apolipoprotein A-I and envelope proteins of human immunodeficiency virus type 1 in CD4 receptor binding.	Pubmed	0.0001648	1	0.0168	0.1943	2	2	APOA1,CD4
Pubmed	28918391	Genetic polymorphisms associated with the risk of concussion in 1056 college athletes: a multicentre prospective cohort study.	Pubmed	0.0001648	1	0.0168	0.1943	2	2	APOE,IL6R
Pubmed	17380124	Dopamine transporter cell surface localization facilitated by a direct interaction with the dopamine D2 receptor.	Pubmed	0.0001648	1	0.0168	0.1943	2	2	SLC6A3,DRD2
Pubmed	16129408	Phosphorylation inhibits DNA-binding of alternatively spliced aryl hydrocarbon receptor nuclear translocator.	Pubmed	0.0001648	1	0.0168	0.1943	2	2	ARNT,CSNK2A1
Pubmed	17148684	An increased osteoprotegerin serum release characterizes the early onset of diabetes mellitus and may contribute to endothelial cell dysfunction.	Pubmed	0.0001648	1	0.0168	0.1943	2	2	APOE,TNFRSF11B
Pubmed	22462479	Endogenously released ACh and exogenous nicotine differentially facilitate long-term potentiation induction in the hippocampal CA1 region of mice.	Pubmed	0.0001648	1	0.0168	0.1943	2	2	CHRNA7,CHRNB2
Pubmed	16765459	Olfactory discrimination deficits in mice lacking the dopamine transporter or the D2 dopamine receptor.	Pubmed	0.0001648	1	0.0168	0.1943	2	2	SLC6A3,DRD2
Pubmed	27181061	Dopamine Regulation of Lateral Inhibition between Striatal Neurons Gates the Stimulant Actions of Cocaine.	Pubmed	0.0001648	1	0.0168	0.1943	2	2	SLC6A3,DRD2
Pubmed	11491539	The mouse Dap10 gene.	Pubmed	0.0001648	1	0.0168	0.1943	2	2	TYROBP,HCST
Pubmed	23134962	[Association between polymorphisms of Pen2 gene and late onset Alzheimer's disease].	Pubmed	0.0001648	1	0.0168	0.1943	2	2	APOE,PSENEN
Pubmed	23990207	Bone marrow- or vessel wall-derived osteoprotegerin is sufficient to reduce atherosclerotic lesion size and vascular calcification.	Pubmed	0.0001648	1	0.0168	0.1943	2	2	APOE,TNFRSF11B
Pubmed	16098625	Oncogenic role of the frizzled-7/beta-catenin pathway in hepatocellular carcinoma.	Pubmed	0.0001648	1	0.0168	0.1943	2	2	FZD7,CTNNB1
Pubmed	11477092	Retrovirus-mediated expression of apolipoprotein A-I in the macrophage protects against atherosclerosis in vivo.	Pubmed	0.0001648	1	0.0168	0.1943	2	2	APOA1,APOE
Pubmed	18299425	Molecular characterization and bioinformatics analysis of Ncoa7B, a novel ovulation-associated and reproduction system-specific Ncoa7 isoform.	Pubmed	0.0001648	1	0.0168	0.1943	2	2	OXR1,NCOA7
Pubmed	17254710	APOE genotypes in African American female multiple sclerosis patients.	Pubmed	0.0001648	1	0.0168	0.1943	2	2	APOC1,APOE
Pubmed	7638166	Reconsideration of the catalytic center and mechanism of mammalian paraoxonase/arylesterase.	Pubmed	0.0001648	1	0.0168	0.1943	2	2	PON1,APOA1
Pubmed	20947215	Paraoxonase-1 polymorphisms in Alzheimer's disease, Parkinson's disease, and AD-PD spectrum diseases.	Pubmed	0.0001648	1	0.0168	0.1943	2	2	PON1,APOE
Pubmed	27013243	Retrotransposon derepression leads to activation of the unfolded protein response and apoptosis in pro-B cells.	Pubmed	0.0001648	1	0.0168	0.1943	2	2	SETDB1,CD79A
Pubmed	11846401	A single amino acid mutation results in a rapid inactivation of epithelial calcium channels.	Pubmed	0.0001648	1	0.0168	0.1943	2	2	TRPV6,TRPV5
Pubmed	26222090	?7 nicotinic ACh receptor-deficient mice exhibit sustained attention impairments that are reversed by ?2 nicotinic ACh receptor activation.	Pubmed	0.0001648	1	0.0168	0.1943	2	2	CHRNA7,CHRNB2
Pubmed	22083140	Inhibition of GSK3 by Wnt signalling--two contrasting models.	Pubmed	0.0001648	1	0.0168	0.1943	2	2	CTNNB1,TPPP
Pubmed	9211985	Association of human, rat, and rabbit apolipoprotein E with beta-amyloid.	Pubmed	0.0001648	1	0.0168	0.1943	2	2	APOA1,APOE
Pubmed	21740922	A genome-wide association study confirms APOE as the major gene influencing survival in long-lived individuals.	Pubmed	0.0001648	1	0.0168	0.1943	2	2	APOC1,APOE
Pubmed	23280703	TWIST interacts with ?-catenin signaling on osteosarcoma cell survival against cisplatin.	Pubmed	0.0001648	1	0.0168	0.1943	2	2	TWIST1,CTNNB1
Pubmed	21949127	p21-Activated kinase 3 (PAK3) protein regulates synaptic transmission through its interaction with the Nck2/Grb4 protein adaptor.	Pubmed	0.0001648	1	0.0168	0.1943	2	2	NCK2,PAK3
Pubmed	19906957	Hyperdopaminergic tone erodes prefrontal long-term potential via a D2 receptor-operated protein phosphatase gate.	Pubmed	0.0001648	1	0.0168	0.1943	2	2	SLC6A3,DRD2
Pubmed	20164363	APOA1 and APOA4 gene polymorphisms influence the effects of dietary fat on LDL particle size and oxidation in healthy young adults.	Pubmed	0.0001648	1	0.0168	0.1943	2	2	APOA1,APOA4
Pubmed	22053053	Exercise and genetic rescue of SCA1 via the transcriptional repressor Capicua.	Pubmed	0.0001648	1	0.0168	0.1943	2	2	ATXN1,CIC
Pubmed	11827171	Characterization of CK2 holoenzyme variants with regard to crystallization.	Pubmed	0.0001648	1	0.0168	0.1943	2	2	CSNK2A1,CSNK2B
Pubmed	23954803	Dopamine D? and acetylcholine ?7 nicotinic receptors have subcellular distributions favoring mediation of convergent signaling in the mouse ventral tegmental area.	Pubmed	0.0001648	1	0.0168	0.1943	2	2	CHRNA7,DRD2
Pubmed	24965284	Synergistic epistasis of paraoxonase 1 (rs662 and rs85460) and apolipoprotein E4 genes in pathogenesis of Alzheimer's disease and vascular dementia.	Pubmed	0.0001648	1	0.0168	0.1943	2	2	PON1,APOE
Pubmed	17391516	The OXR domain defines a conserved family of eukaryotic oxidation resistance proteins.	Pubmed	0.0001648	1	0.0168	0.1943	2	2	OXR1,NCOA7
Pubmed	24021281	Focal adhesion kinase mediates ?-catenin signaling in periodontal ligament cells.	Pubmed	0.0001648	1	0.0168	0.1943	2	2	CTNNB1,PTK2
Pubmed	27916276	A Surveillance Mechanism Ensures Repair of DNA Lesions during Zygotic Reprogramming.	Pubmed	0.0001648	1	0.0168	0.1943	2	2	XRCC1,RAD21
Pubmed	16930546	Prenylated Rab acceptor 1 (PRA1) inhibits TCF/beta-catenin signaling by binding to beta-catenin.	Pubmed	0.0001648	1	0.0168	0.1943	2	2	RABAC1,CTNNB1
Pubmed	11574463	Crystal structure of human protein kinase CK2: insights into basic properties of the CK2 holoenzyme.	Pubmed	0.0001648	1	0.0168	0.1943	2	2	CSNK2A1,CSNK2B
Pubmed	18688283	The intermediate-conductance calcium-activated potassium channel KCa3.1 contributes to atherogenesis in mice and humans.	Pubmed	0.0001648	1	0.0168	0.1943	2	2	APOE,KCNN4
Pubmed	19075187	A critical role for DAP10 and DAP12 in CD8+ T cell-mediated tissue damage in large granular lymphocyte leukemia.	Pubmed	0.0001648	1	0.0168	0.1943	2	2	TYROBP,HCST
Pubmed	26850495	The MBOAT7-TMC4 Variant rs641738 Increases Risk of Nonalcoholic Fatty Liver Disease in Individuals of European Descent.	Pubmed	0.0001648	1	0.0168	0.1943	2	2	MBOAT7,TMC4
Pubmed	11807408	Genetic polymorphisms of the promoter region of dopamine D2 receptor and dopamine transporter genes and alcoholism among four aboriginal groups and Han Chinese in Taiwan.	Pubmed	0.0001648	1	0.0168	0.1943	2	2	SLC6A3,DRD2
Pubmed	17907820	Food reinforcement, the dopamine D2 receptor genotype, and energy intake in obese and nonobese humans.	Pubmed	0.0001648	1	0.0168	0.1943	2	2	SLC6A3,DRD2
Pubmed	15541879	Impaired passive avoidance learning in mice lacking central neuronal nicotinic acetylcholine receptors.	Pubmed	0.0001648	1	0.0168	0.1943	2	2	CHRNA7,CHRNB2
Pubmed	16564089	Diverse calcium channel types are present in the human placental syncytiotrophoblast basal membrane.	Pubmed	0.0001648	1	0.0168	0.1943	2	2	TRPV6,TRPV5
Pubmed	20976039	Trace eyeblink conditioning is impaired in ?7 but not in ?2 nicotinic acetylcholine receptor knockout mice.	Pubmed	0.0001648	1	0.0168	0.1943	2	2	CHRNA7,CHRNB2
Pubmed	19808960	Apolipoprotein E/C1 locus variants modify renal cell carcinoma risk.	Pubmed	0.0001648	1	0.0168	0.1943	2	2	APOC1,APOE
Pubmed	28502470	Antitumoral Cascade-Targeting Ligand for IL-6 Receptor-Mediated Gene Delivery to Glioma.	Pubmed	0.0001648	1	0.0168	0.1943	2	2	IL6R,ING4
Pubmed	16565876	Interaction of the epithelial Ca2+ channels TRPV5 and TRPV6 with the intestine- and kidney-enriched PDZ protein NHERF4.	Pubmed	0.0001648	1	0.0168	0.1943	2	2	TRPV6,TRPV5
Pubmed	16832079	Exploring the association of glyceraldehyde-3-phosphate dehydrogenase gene and Alzheimer disease.	Pubmed	0.0001648	1	0.0168	0.1943	2	2	GAPDH,GAPDHS
Pubmed	24761864	Expression and prognostic roles of TRPV5 and TRPV6 in non-small cell lung cancer after curative resection.	Pubmed	0.0001648	1	0.0168	0.1943	2	2	TRPV6,TRPV5
Pubmed	12748169	Tumor necrosis factor-induced nuclear factor kappaB activation is impaired in focal adhesion kinase-deficient fibroblasts.	Pubmed	0.0001648	1	0.0168	0.1943	2	2	PTK2,TNFRSF1A
Pubmed	23207651	A genome-wide association study implicates the APOE locus in nonpathological cognitive ageing.	Pubmed	0.0001648	1	0.0168	0.1943	2	2	TOMM40,APOE
Pubmed	17474819	A high-density whole-genome association study reveals that APOE is the major susceptibility gene for sporadic late-onset Alzheimer's disease.	Pubmed	0.0001648	1	0.0168	0.1943	2	2	APOC1,APOE
Pubmed	23103763	Reciprocal expression of MRTF-A and myocardin is crucial for pathological vascular remodelling in mice.	Pubmed	0.0001648	1	0.0168	0.1943	2	2	MRTFA,MYOCD
Pubmed	15746435	Matrix metalloproteinase-9 modulation by resident arterial cells is responsible for injury-induced accelerated atherosclerotic plaque development in apolipoprotein E-deficient mice.	Pubmed	0.0001648	1	0.0168	0.1943	2	2	MMP9,APOE
Pubmed	18563706	The impact of genetic variation in DRD2 and SLC6A3 on smoking cessation in a cohort of participants 1 year after enrollment in a lung cancer screening study.	Pubmed	0.0001648	1	0.0168	0.1943	2	2	SLC6A3,DRD2
Pubmed	7144574	Glyceraldehyde-3-phosphate dehydrogenase from human tissues.	Pubmed	0.0001648	1	0.0168	0.1943	2	2	GAPDH,GAPDHS
Pubmed	20170711	Association analysis between polymorphisms in the dopamine D2 receptor (DRD2) and dopamine transporter (DAT1) genes with cocaine dependence.	Pubmed	0.0001648	1	0.0168	0.1943	2	2	SLC6A3,DRD2
Pubmed	26510953	Opposing effects of Apoe/Apoa1 double deletion on amyloid-? pathology and cognitive performance in APP mice.	Pubmed	0.0001648	1	0.0168	0.1943	2	2	APOA1,APOE
Pubmed	11983814	Fructose intake increases hyperlipidemia and modifies apolipoprotein expression in apolipoprotein AI-CIII-AIV transgenic mice.	Pubmed	0.0001648	1	0.0168	0.1943	2	2	APOA1,APOA4
Pubmed	12499050	A polymorphism in the complement component C1r is not associated with sporadic Alzheimer's disease.	Pubmed	0.0001648	1	0.0168	0.1943	2	2	APOE,C1R
Pubmed	20150244	Putative anion transporter-1 (Pat-1, Slc26a6) contributes to intracellular pH regulation during H+-dipeptide transport in duodenal villous epithelium.	Pubmed	0.0001648	1	0.0168	0.1943	2	2	SLC26A6,CA2
Pubmed	22972984	Signaling through cannabinoid receptor 2 suppresses murine dendritic cell migration by inhibiting matrix metalloproteinase 9 expression.	Pubmed	0.0001648	1	0.0168	0.1943	2	2	MMP9,CNR2
Pubmed	21924378	Lack of acyl-CoA:diacylglycerol acyltransferase 1 reduces intestinal cholesterol absorption and attenuates atherosclerosis in apolipoprotein E knockout mice.	Pubmed	0.0001648	1	0.0168	0.1943	2	2	APOE,DGAT1
Pubmed	26643732	A New Subtype of Multiple Synostoses Syndrome Is Caused by a Mutation in GDF6 That Decreases Its Sensitivity to Noggin and Enhances Its Potency as a BMP Signal.	Pubmed	0.0001648	1	0.0168	0.1943	2	2	NOG,GDF6
Pubmed	22898894	Pleiotropy and allelic heterogeneity in the TOMM40-APOE genomic region related to clinical and metabolic features of hepatitis C infection.	Pubmed	0.0001648	1	0.0168	0.1943	2	2	TOMM40,APOE
Pubmed	24431302	Wnt signaling in midbrain dopaminergic neuron development and regenerative medicine for Parkinson's disease.	Pubmed	0.0001682	1	0.01712	0.198	6	64	FZD6,FZD7,ARHGEF19,RSPO2,CTNNB1,RSPO1
Pubmed	18614015	A mitochondrial protein compendium elucidates complex I disease biology.	Pubmed	0.0001885	1	0.01916	0.2215	27	982	COX6B2,TBRG4,ME1,TSTD1,SLC25A32,FDPS,TOMM40,RDH14,MRPL13,CROT,THEM4,PDP1,MRPS15,NDUFAF6,EMC2,CMC1,CYP11B2,NDUFV1,DAP3,TMEM65,PRSS35,KRT5,OXR1,LARS2,GTPBP10,HIBADH,MECR
Pubmed	25544563	Global mapping of herpesvirus-host protein complexes reveals a transcription strategy for late genes.	Pubmed	0.0002041	1	0.02071	0.2395	18	533	TBRG4,TOMM40,FAM8A1,CERS2,MBOAT7,CHCHD6,XRCC1,OSBPL3,TEX10,NDUFV1,ANKRD28,C4A,THRAP3,RBM4B,GTPBP10,RNF41,RPA2,EPB41
Pubmed	22534482	Patterned expression of ion channel genes in mouse dorsal raphe nucleus determined with the Allen Mouse Brain Atlas.	Pubmed	0.0002276	1	0.02305	0.2665	4	24	CACNA1A,CACNA1B,GRIK2,CACNG6
Pubmed	9632636	Grb10 identified as a potential regulator of growth hormone (GH) signaling by cloning of GH receptor target proteins.	Pubmed	0.0002321	1	0.02319	0.2681	3	10	SHC1,PTPN6,GRB10
Pubmed	17683113	The Foxn1-dependent transcripts PCOLCE2 and mPPP1R16B are not required for normal thymopoiesis.	Pubmed	0.0002321	1	0.02319	0.2681	3	10	KRT5,KRT8,CD4
Pubmed	10051620	Localization of non-Mhc collagen-induced arthritis susceptibility loci in DBA/1j mice.	Pubmed	0.0002321	1	0.02319	0.2681	3	10	CD4,CD27,TNFRSF1A
Pubmed	10087289	Genotyping new BXD recombinant inbred mouse strains and comparison of BXD and consensus maps.	Pubmed	0.0002321	1	0.02319	0.2681	3	10	ME1,APOA1,CA2
Pubmed	25199915	GWAS of longevity in CHARGE consortium confirms APOE and FOXO3 candidacy.	Pubmed	0.0002321	1	0.02319	0.2681	3	10	APOE,MBOAT1,GRIK2
Pubmed	17532316	Essential roles of mesenchyme-derived beta-catenin in mouse Müllerian duct morphogenesis.	Pubmed	0.0002321	1	0.02319	0.2681	3	10	FZD6,FZD7,CTNNB1
Pubmed	20186915	Neural tube defects and impaired neural progenitor cell proliferation in Gbeta1-deficient mice.	Pubmed	0.0002321	1	0.02319	0.2681	3	10	CTNNB1,GNB3,GNB4
Pubmed	10686478	Organizations and gene duplications of the human and mouse MHC complement gene clusters.	Pubmed	0.0002321	1	0.02319	0.2681	3	10	CYP21A2,C4A,TNXB
Pubmed	17634366	Proteolipid protein is required for transport of sirtuin 2 into CNS myelin.	Pubmed	0.0002411	1	0.02405	0.2781	9	161	MBP,HSPA2,CNTN1,GAPDH,CA2,TPPP,INA,MYH14,GNB4
Pubmed	23341629	Inactivation of the microRNA-183/96/182 cluster results in syndromic retinal degeneration.	Pubmed	0.0002415	1	0.02405	0.2781	10	197	TUFT1,FXYD1,PNRC2,RSPO2,RAPGEF5,MTSS1,PTPN6,C4A,TCEA3,TNFRSF1A
Pubmed	26831064	CHK2-BRCA1 tumor-suppressor axis restrains oncogenic Aurora-A kinase to ensure proper mitotic microtubule assembly.	Pubmed	0.0002447	1	0.02433	0.2813	17	494	RPS9,RPS19,AGO3,PLEC,CEP72,ZFR,CTNNB1,EIF3H,CTPS1,GAPDH,EIF3E,DDX6,NOP2,SPAG9,MYH14,RPL18,TPI1
Pubmed	27559042	Glycoproteomics Reveals Decorin Peptides With Anti-Myostatin Activity in Human Atrial Fibrillation.	Pubmed	0.0002528	1	0.02509	0.2901	7	97	COL4A2,APCS,APOA1,APOA4,APOE,BCAM,TNXB
Pubmed	18973680	Microarray analysis of Foxa2 mutant mouse embryos reveals novel gene expression and inductive roles for the gastrula organizer and its derivatives.	Pubmed	0.0002613	1	0.02589	0.2993	12	277	CBX3,MFAP2,CTHRC1,PNRC2,CSNK2A1,GALNT1,DDX6,RBMS3,AKIRIN1,INA,RNF41,TPBG
Pubmed	28911199	Age-dependent effects of Armc5 haploinsufficiency on adrenocortical function.	Pubmed	0.0002682	1	0.02653	0.3067	4	25	CTNNB1,CYP11B2,CYP21A2,DRD2
Pubmed	20211142	An atlas of combinatorial transcriptional regulation in mouse and man.	Pubmed	0.0002705	1	0.02671	0.3088	24	846	ZNF384,JDP2,CHD4,RXRB,NR0B2,MRTFA,ZNF502,CERS2,ZBTB32,NKD2,MTF1,ZBTB25,GMEB1,MYOCD,CTNNB1,HDAC9,ZNF236,CIC,NR2E3,NR4A3,ZBTB7B,CITED4,ING4,PBXIP1
Pubmed	24639526	RSPO-LGR4 functions via IQGAP1 to potentiate Wnt signaling.	Pubmed	0.0002951	1	0.02875	0.3324	10	202	CHD4,HSPA2,CREB5,PRSS1,PTK2,NOP2,THRAP3,KRT5,MYH14,RSPO1
Pubmed	16964243	A probability-based approach for high-throughput protein phosphorylation analysis and site localization.	Pubmed	0.0003013	1	0.02875	0.3324	17	503	TBRG4,CBX3,RCC1,ADAR,MEF2D,TACC3,MRTFA,GMEB1,NCAPD2,NAV2,NOP2,THRAP3,KRT8,MAN1C1,GRB10,TRIM47,RPL18
Pubmed	26439863	Cell Surface Proteomic Map of HIV Infection Reveals Antagonism of Amino Acid Metabolism by Vpu and Nef.	Pubmed	0.0003082	1	0.02875	0.3324	8	132	FZD6,SLC40A1,SLC9A1,HCST,CD4,CD27,CD37,TNFRSF1A
Pubmed	2165966	The NXSM recombinant inbred strains of mice: genetic profile for 58 loci including the Mtv proviral loci.	Pubmed	0.0003138	1	0.02875	0.3324	4	26	MBP,ME1,ITGA1,CA2
Pubmed	19710420	Mice lacking mannose 6-phosphate uncovering enzyme activity have a milder phenotype than mice deficient for N-acetylglucosamine-1-phosphotransferase activity.	Pubmed	0.0003161	1	0.02875	0.3324	3	11	GBA,NAGPA,M6PR
Pubmed	8599832	IL-16- and other CD4 ligand-induced migration is dependent upon protein kinase C.	Pubmed	0.0003161	1	0.02875	0.3324	3	11	PRKCG,IL16,CD4
Pubmed	24860427	Frizzled-9 impairs acetylcholine receptor clustering in skeletal muscle cells.	Pubmed	0.0003161	1	0.02875	0.3324	3	11	FZD6,FZD7,CTNNB1
Pubmed	10945468	cDNA cloning and expression analysis of new members of the mammalian F-box protein family.	Pubmed	0.0003161	1	0.02875	0.3324	3	11	KDM2A,FBXL5,FBXL4
Pubmed	20413122	Soluble fibre (Plantago ovata husk) reduces plasma low-density lipoprotein (LDL) cholesterol, triglycerides, insulin, oxidised LDL and systolic blood pressure in hypercholesterolaemic patients: A randomised trial.	Pubmed	0.0003161	1	0.02875	0.3324	3	11	APOA1,APOE,CRABP2
Pubmed	29361573	Podoplanin regulates mammary stem cell function and tumorigenesis by potentiating Wnt/?-catenin signaling.	Pubmed	0.0003161	1	0.02875	0.3324	3	11	CTNNB1,KRT5,KRT8
Pubmed	19056867	Large-scale proteomics and phosphoproteomics of urinary exosomes.	Pubmed	0.0003262	1	0.02875	0.3324	27	1017	PKLR,HSPA2,ANPEP,S100A16,APCS,APOA1,APOE,CRABP2,CREB5,GLIPR2,EIF3H,MYH13,GAPDH,SRI,SERINC2,ITGA1,TMBIM1,PTPN6,SMPDL3B,RAB3B,CA2,DPYS,SPAG9,MAL2,MYH14,BCAM,TPI1
Pubmed	22286219	Genome-wide association study identifies multiple loci influencing human serum metabolite levels.	Pubmed	0.0003275	1	0.02875	0.3324	5	47	APOA1,APOA4,APOC1,APOC2,APOE
Pubmed	9371744	Genetic mapping of 262 loci derived from expressed sequences in a murine interspecific cross using single-strand conformational polymorphism analysis.	Pubmed	0.0003317	1	0.02875	0.3324	10	205	MBP,CNTN1,PNRC2,UBXN11,RIMS2,NDUFV1,PTK2,PTPN6,NOP2,TSHZ1
Pubmed	21423176	Analysis of the myosin-II-responsive focal adhesion proteome reveals a role for ?-Pix in negative regulation of focal adhesion maturation.	Pubmed	0.0003381	1	0.02875	0.3324	12	285	RPS9,RPS19,PIP5K1A,PLEC,FHL3,ITGA8,SLC9A1,CTNNB1,SNTB1,ITGA1,PVR,RPL18
Pubmed	19738201	Proteomic analysis of integrin-associated complexes identifies RCC2 as a dual regulator of Rac1 and Arf6.	Pubmed	0.0003549	1	0.02875	0.3324	21	707	RPS9,CBX3,RPS19,RCC1,CHD4,EMG1,PLEC,MRPL13,CSNK2A1,CSNK2B,GAPDH,SRI,EIF3E,DDX6,KIF2C,KRT5,KRT8,ARHGEF1,RPA2,EPB41,RPL18
Pubmed	28675934	Characterization of the Extracellular Matrix of Normal and Diseased Tissues Using Proteomics.	Pubmed	0.0003587	1	0.02875	0.3324	8	135	MFAP2,CTHRC1,COL4A2,PRSS1,COL21A1,MFAP5,CLEC3B,TNXB
Pubmed	17525332	ATM and ATR substrate analysis reveals extensive protein networks responsive to DNA damage.	Pubmed	0.0003647	1	0.02875	0.3324	4	27	MRTFA,MDC1,GNL1,RPA2
Pubmed	17114649	Qualitative and quantitative analyses of protein phosphorylation in naive and stimulated mouse synaptosomal preparations.	Pubmed	0.0003673	1	0.02875	0.3324	13	330	LMTK3,PLEC,ADAM22,PRKCG,CTNNB1,RIMS2,PTK2,SNAP91,TMEM145,CACNA1A,CACNA1B,OXR1,CACNG8
Pubmed	17015433	Cracking the egg: molecular dynamics and evolutionary aspects of the transition from the fully grown oocyte to embryo.	Pubmed	0.0003699	1	0.02875	0.3324	11	247	CHD4,ARID1A,TTK,MFAP2,DEPTOR,MTF1,GMEB1,ESRP1,TEX10,CDKAL1,NAV2
Pubmed	25402006	In silico prediction of physical protein interactions and characterization of interactome orphans.	Pubmed	0.0003769	1	0.02875	0.3324	8	136	TWIST1,NCK2,SHC1,CTNNB1,GAPDH,PTK2,GRB10,TNFRSF1A
Pubmed	19490893	A genome-wide RNAi screen identifies multiple synthetic lethal interactions with the Ras oncogene.	Pubmed	0.000378	1	0.02875	0.3324	13	331	TWIST1,CLCN1,DCAF13,ADAM22,PPP1R8,IBTK,FEZ2,KDM2A,RHBDL2,NCAPD2,NAV3,KIF2C,RPA2
Pubmed	9110174	Large-scale concatenation cDNA sequencing.	Pubmed	0.0003925	1	0.02875	0.3324	18	563	ADCY2,STX12,USF2,DERL1,CROT,UBXN11,FLAD1,RIMS2,GAPDH,RRAGC,FBXL5,SNAP91,SV2B,KIFC2,PAK3,CD79A,RNF41,NAGPA
Pubmed	20471030	Proteome analysis of the thalamus and cerebrospinal fluid reveals glycolysis dysfunction and potential biomarkers candidates for schizophrenia.	Pubmed	0.0003987	1	0.02875	0.3324	5	49	MBP,PLEC,PRKCG,GAPDH,TPI1
Pubmed	20864672	Genetic variants influencing circulating lipid levels and risk of coronary artery disease.	Pubmed	0.0003987	1	0.02875	0.3324	5	49	APOA1,APOA4,APOC1,APOC2,APOE
Pubmed	19692168	Genetic susceptibility to distinct bladder cancer subphenotypes.	Pubmed	0.0003989	1	0.02875	0.3324	15	422	RXRB,FZD7,APOA4,XRCC1,APOE,SLC6A3,ARNT,CTNNB1,IL6R,CX3CR1,HSPB8,DRD2,CD4,CD86,TNFRSF1A
Pubmed	15951569	Time-resolved mass spectrometry of tyrosine phosphorylation sites in the epidermal growth factor receptor signaling network reveals dynamic modules.	Pubmed	0.0004015	1	0.02875	0.3324	6	75	EPHB2,PLEC,SHC1,DCBLD2,PTK2,ARHGEF5
Pubmed	7890684	Characterization of B61, the ligand for the Eck receptor protein-tyrosine kinase.	Pubmed	0.0004175	1	0.02875	0.3324	3	12	PKLR,AMPD1,GBA
Pubmed	1347284	Chromosomal mapping of the high affinity Fc gamma receptor gene.	Pubmed	0.0004175	1	0.02875	0.3324	3	12	PKLR,AMPD1,GBA
Pubmed	2338144	Chromosomal localization of the mouse genes coding for alpha 2, alpha 3, alpha 4 and beta 2 subunits of neuronal nicotinic acetylcholine receptor.	Pubmed	0.0004175	1	0.02875	0.3324	3	12	ME1,CHRNB2,PKLR
Pubmed	18981061	Sex-specific roles of beta-catenin in mouse gonadal development.	Pubmed	0.0004175	1	0.02875	0.3324	3	12	CTNNB1,CYP21A2,RSPO1
Pubmed	29317443	A mutation in	Pubmed	0.0004175	1	0.02875	0.3324	3	12	MBP,CTNNB1,DNALI1
Pubmed	27313319	The adrenal capsule is a signaling center controlling cell renewal and zonation through Rspo3.	Pubmed	0.0004175	1	0.02875	0.3324	3	12	RSPO2,CTNNB1,RSPO1
Pubmed	22437554	Genome-wide association study identifies three common variants associated with serologic response to vitamin E supplementation in men.	Pubmed	0.0004175	1	0.02875	0.3324	3	12	P3H3,GNB3,CD4
Pubmed	22560610	PTK7 regulates myosin II activity to orient planar polarity in the mammalian auditory epithelium.	Pubmed	0.0004175	1	0.02875	0.3324	3	12	FZD6,CTNNB1,MYH14
Pubmed	22096492	Maternal synchronization of gestational length and lung maturation.	Pubmed	0.0004212	1	0.02875	0.3324	4	28	FABP5,ITGA8,PON1,HEY1
Pubmed	24999758	Proteomic Analysis of the EWS-Fli-1 Interactome Reveals the Role of the Lysosome in EWS-Fli-1 Turnover.	Pubmed	0.0004294	1	0.02875	0.3324	15	425	U2AF2,RPS19,ARID1A,STX12,LENG1,NSMCE2,PNISR,CREB5,IL16,GAPDH,CIC,LIN37,CA2,GRWD1,TPI1
Pubmed	24623722	Systematic identification of pathological lamin A interactors.	Pubmed	0.0004477	1	0.02875	0.3324	13	337	TMEM74,TMEM222,STX12,FXYD3,DERL1,IFFO1,RABAC1,VAMP5,FXYD6,MALL,TMEM65,AQP10,ENTPD3
Pubmed	15302935	Large-scale characterization of HeLa cell nuclear phosphoproteins.	Pubmed	0.0004608	1	0.02875	0.3324	22	773	RCC1,CHD4,MEF2D,PLEC,TACC3,MRTFA,S100A16,PNISR,SETD2,CSNK2A1,ZNF335,MDC1,PHACTR4,ZNF516,CTPS1,KMT2B,CIC,DBF4,NOP2,THRAP3,SPAG9,CDH17
Pubmed	19505873	Complementary quantitative proteomics reveals that transcription factor AP-4 mediates E-box-dependent complex formation for transcriptional repression of HDM2.	Pubmed	0.0004627	1	0.02875	0.3324	6	77	ARID1A,USF2,ZNF335,MDC1,NAV3,ZBTB7B
Pubmed	19851445	High-density SNP screening of the major histocompatibility complex in systemic lupus erythematosus demonstrates strong evidence for independent susceptibility regions.	Pubmed	0.0004638	1	0.02875	0.3324	9	176	RXRB,AIF1,MSH5,CSNK2B,MDC1,GNL1,DDR1,PRRT1,TNXB
Pubmed	16341674	Transcriptome analysis of human gastric cancer.	Pubmed	0.0004745	1	0.02875	0.3324	21	723	TMEM245,FXYD1,CERS2,TMC4,THEM4,NDUFAF6,SOX4,GALNT1,SRI,FXYD5,ST14,PTPN6,MALL,OSGIN2,GNL1,KRT8,NAT14,UBE2C,TNFRSF11B,RPA2,EPB41
Pubmed	12954636	Disruption of TR4 orphan nuclear receptor reduces the expression of liver apolipoprotein E/C-I/C-II gene cluster.	Pubmed	0.0004838	1	0.02875	0.3324	2	3	APOC2,APOE
Pubmed	14986172	A promoter variant of the ATP-binding cassette transporter A1 gene alters the HDL cholesterol level in the general Japanese population.	Pubmed	0.0004838	1	0.02875	0.3324	2	3	APOA1,APOE
Pubmed	21533863	Genetic influences on Alzheimer's disease: evidence of interactions between the genes APOE, APOC1 and ACE in a sample population from the South of Brazil.	Pubmed	0.0004838	1	0.02875	0.3324	2	3	APOC1,APOE
Pubmed	20849816	The role of protein kinase CK2 in the regulation of the insulin production of pancreatic islets.	Pubmed	0.0004838	1	0.02875	0.3324	2	3	CSNK2A1,CSNK2B
Pubmed	18358245	Paraoxonase 1 (PON1) attenuates diabetes development in mice through its antioxidative properties.	Pubmed	0.0004838	1	0.02875	0.3324	2	3	PON1,APOE
Pubmed	26100872	The histone methyltransferase SETDB1 represses endogenous and exogenous retroviruses in B lymphocytes.	Pubmed	0.0004838	1	0.02875	0.3324	2	3	SETDB1,CD79A
Pubmed	22383701	Contribution of platelet CX(3)CR1 to platelet-monocyte complex formation and vascular recruitment during hyperlipidemia.	Pubmed	0.0004838	1	0.02875	0.3324	2	3	APOE,CX3CR1
Pubmed	16752383	Frequent amplifications and abundant expression of TRIO, NKD2, and IRX2 in soft tissue sarcomas.	Pubmed	0.0004838	1	0.02875	0.3324	2	3	TRIO,NKD2
Pubmed	19481555	In vivo effects of 3-iodocytisine: pharmacological and genetic analysis of hypothermia and evaluation of chronic treatment on nicotinic binding sites.	Pubmed	0.0004838	1	0.02875	0.3324	2	3	CHRNA7,CHRNB2
Pubmed	20511563	Novel cleft susceptibility genes in chromosome 6q.	Pubmed	0.0004838	1	0.02875	0.3324	2	3	SNAP91,PRSS35
Pubmed	8107101	The human immunodeficiency virus type 1 encoded Vpu protein is phosphorylated by casein kinase-2 (CK-2) at positions Ser52 and Ser56 within a predicted alpha-helix-turn-alpha-helix-motif.	Pubmed	0.0004838	1	0.02875	0.3324	2	3	CSNK2A1,CSNK2B
Pubmed	17991871	Increased smooth muscle cell activation and neointima formation in response to injury in AIF-1 transgenic mice.	Pubmed	0.0004838	1	0.02875	0.3324	2	3	AIF1,APOE
Pubmed	21777522	CK2 phosphorylates AP-2? and increases its transcriptional activity.	Pubmed	0.0004838	1	0.02875	0.3324	2	3	CSNK2A1,CSNK2B
Pubmed	22553201	Structural characterization of binding mode of smoking cessation drugs to nicotinic acetylcholine receptors through study of ligand complexes with acetylcholine-binding protein.	Pubmed	0.0004838	1	0.02875	0.3324	2	3	CHRNA7,CHRNB2
Pubmed	22081881	Dopaminergic polymorphisms and educational achievement: results from a longitudinal sample of Americans.	Pubmed	0.0004838	1	0.02875	0.3324	2	3	SLC6A3,DRD2
Pubmed	22562247	Unbalanced expression of CK2 kinase subunits is sufficient to drive epithelial-to-mesenchymal transition by Snail1 induction.	Pubmed	0.0004838	1	0.02875	0.3324	2	3	CSNK2A1,CSNK2B
Pubmed	25317801	Serum and tissue expression of gelatinase and Twist in breast cancer.	Pubmed	0.0004838	1	0.02875	0.3324	2	3	TWIST1,MMP9
Pubmed	11606045	Heterogeneity in the phosphorylation of human death receptors by p42(mapk/erk2).	Pubmed	0.0004838	1	0.02875	0.3324	2	3	TNFRSF25,TNFRSF1A
Pubmed	20078884	Vpu serine 52 dependent counteraction of tetherin is required for HIV-1 replication in macrophages, but not in ex vivo human lymphoid tissue.	Pubmed	0.0004838	1	0.02875	0.3324	2	3	CSNK2A1,CD4
Pubmed	24523520	Distinct roles for Cav2.1-2.3 in activity-dependent synaptic dynamics.	Pubmed	0.0004838	1	0.02875	0.3324	2	3	CACNA1A,CACNA1B
Pubmed	23935104	The transcription factor Twist1 limits T helper 17 and T follicular helper cell development by repressing the gene encoding the interleukin-6 receptor ? chain.	Pubmed	0.0004838	1	0.02875	0.3324	2	3	TWIST1,IL6R
Pubmed	20472897	Distinct infiltration of neutrophils in lesion shoulders in ApoE-/- mice.	Pubmed	0.0004838	1	0.02875	0.3324	2	3	APOE,CX3CR1
Pubmed	19364291	Dopamine-related genotypes and the dose-response effect of methylphenidate on eating in attention-deficit/hyperactivity disorder youths.	Pubmed	0.0004838	1	0.02875	0.3324	2	3	SLC6A3,DRD2
Pubmed	22815945	Hydrogen sulfide inhibits the development of atherosclerosis with suppressing CX3CR1 and CX3CL1 expression.	Pubmed	0.0004838	1	0.02875	0.3324	2	3	APOE,CX3CR1
Pubmed	12079279	Neuron navigator: a human gene family with homology to unc-53, a cell guidance gene from Caenorhabditis elegans.	Pubmed	0.0004838	1	0.02875	0.3324	2	3	NAV3,NAV2
Pubmed	18848921	IgE-induced degranulation of mucosal mast cells is negatively regulated via nicotinic acetylcholine receptors.	Pubmed	0.0004838	1	0.02875	0.3324	2	3	CHRNA7,CHRNB2
Pubmed	23580147	Cross-talk of receptor activator of nuclear factor-?B ligand signaling with renin-angiotensin system in vascular calcification.	Pubmed	0.0004838	1	0.02875	0.3324	2	3	APOE,TNFRSF11B
Pubmed	23637880	Smoking-specific parenting and smoking onset in adolescence: the role of genes from the dopaminergic system (DRD2, DRD4, DAT1 genotypes).	Pubmed	0.0004838	1	0.02875	0.3324	2	3	SLC6A3,DRD2
Pubmed	25839165	Down-regulation of ARNT promotes cancer metastasis by activating the fibronectin/integrin ?1/FAK axis.	Pubmed	0.0004838	1	0.02875	0.3324	2	3	ARNT,PTK2
Pubmed	11222635	Molecular and physiological diversity of nicotinic acetylcholine receptors in the midbrain dopaminergic nuclei.	Pubmed	0.0004838	1	0.02875	0.3324	2	3	CHRNA7,CHRNB2
Pubmed	17428795	Ligand binding and calcium influx induce distinct ectodomain/gamma-secretase-processing pathways of EphB2 receptor.	Pubmed	0.0004838	1	0.02875	0.3324	2	3	EPHB2,MMP9
Pubmed	24922540	Genetic determinants of long-term changes in blood lipid concentrations: 10-year follow-up of the GLACIER study.	Pubmed	0.0004838	1	0.02875	0.3324	2	3	APOA1,APOE
Pubmed	2777798	Sequence of the gene for murine complement component C4.	Pubmed	0.0004838	1	0.02875	0.3324	2	3	CYP21A2,C4A
Pubmed	18025109	RPEL motifs link the serum response factor cofactor MAL but not myocardin to Rho signaling via actin binding.	Pubmed	0.0004838	1	0.02875	0.3324	2	3	MRTFA,MYOCD
Pubmed	18058064	Identification of a significant association of a single nucleotide polymorphism in TNXB with systemic lupus erythematosus in a Japanese population.	Pubmed	0.0004838	1	0.02875	0.3324	2	3	C4A,TNXB
Pubmed	21482674	Lack of protein 4.1G causes altered expression and localization of the cell adhesion molecule nectin-like 4 in testis and can cause male infertility.	Pubmed	0.0004838	1	0.02875	0.3324	2	3	CADM4,EPB41
Pubmed	17577402	Specific expression of lacZ and cre recombinase in fetal thymic epithelial cells by multiplex gene targeting at the Foxn1 locus.	Pubmed	0.0004838	1	0.02875	0.3324	2	3	KRT5,KRT8
Pubmed	11254757	GPI-specific phospholipase D associates with an apoA-I- and apoA-IV-containing complex.	Pubmed	0.0004838	1	0.02875	0.3324	2	3	APOA1,APOA4
Pubmed	23721406	Arginine68 is an essential residue for the C-terminal cleavage of human Atg8 family proteins.	Pubmed	0.0004838	1	0.02875	0.3324	2	3	GABARAP,GABARAPL1
Pubmed	12470599	The Ring-H2 finger motif of CKBBP1/SAG is necessary for interaction with protein kinase CKII and optimal cell proliferation.	Pubmed	0.0004838	1	0.02875	0.3324	2	3	CSNK2A1,CSNK2B
Pubmed	19758344	Haptoglobin binds the antiatherogenic protein apolipoprotein E - impairment of apolipoprotein E stimulation of both lecithin:cholesterol acyltransferase activity and cholesterol uptake by hepatocytes.	Pubmed	0.0004838	1	0.02875	0.3324	2	3	APOA1,APOE
Pubmed	6095106	Two steroid 21-hydroxylase genes are located in the murine S region.	Pubmed	0.0004838	1	0.02875	0.3324	2	3	CYP21A2,C4A
Pubmed	17906149	Src homology domain 2 adaptors affect adherence of Salmonella enterica serovar Typhimurium to non-phagocytic cells.	Pubmed	0.0004838	1	0.02875	0.3324	2	3	NCK2,SHC1
Pubmed	16380433	Identification of BSPRY as a novel auxiliary protein inhibiting TRPV5 activity.	Pubmed	0.0004838	1	0.02875	0.3324	2	3	TRPV6,TRPV5
Pubmed	17878336	The transcription factor Zbtb7b promotes CD4 expression by antagonizing Runx-mediated activation of the CD4 silencer.	Pubmed	0.0004838	1	0.02875	0.3324	2	3	ZBTB7B,CD4
Pubmed	18676739	OPG is regulated by beta-catenin and mediates resistance to TRAIL-induced apoptosis in colon cancer.	Pubmed	0.0004838	1	0.02875	0.3324	2	3	CTNNB1,TNFRSF11B
Pubmed	18978788	Expression of 24,426 human alternative splicing events and predicted cis regulation in 48 tissues and cell lines.	Pubmed	0.0004838	1	0.02875	0.3324	2	3	CLK2,RBFOX1
Pubmed	20219012	Promotion of hepatocellular carcinoma metastasis through matrix metalloproteinase activation by epithelial-mesenchymal transition regulator Twist1.	Pubmed	0.0004838	1	0.02875	0.3324	2	3	TWIST1,MMP9
Pubmed	28112735	Nicotine reverses hypofrontality in animal models of addiction and schizophrenia.	Pubmed	0.0004838	1	0.02875	0.3324	2	3	CHRNA7,CHRNB2
Pubmed	24657591	Genetic variations in dopamine and inhibitory control: lack of influence on action restraint.	Pubmed	0.0004838	1	0.02875	0.3324	2	3	SLC6A3,DRD2
Pubmed	10229828	Mouse NKR-P1B, a novel NK1.1 antigen with inhibitory function.	Pubmed	0.0004838	1	0.02875	0.3324	2	3	NR0B2,PTPN6
Pubmed	11827166	HIV-1 Rev transactivator: a beta-subunit directed substrate and effector of protein kinase CK2.	Pubmed	0.0004838	1	0.02875	0.3324	2	3	CSNK2A1,CSNK2B
Pubmed	28930663	The TREM2-APOE Pathway Drives the Transcriptional Phenotype of Dysfunctional Microglia in Neurodegenerative Diseases.	Pubmed	0.0004838	1	0.02875	0.3324	2	3	APOE,CX3CR1
Pubmed	23458603	Protein kinase C? is a modulator of the dopamine D2 autoreceptor-activated trafficking of the dopamine transporter.	Pubmed	0.0004838	1	0.02875	0.3324	2	3	SLC6A3,DRD2
Pubmed	9654140	Biochemical characterization of HIV-1 Rev as a potent activator of casein kinase II in vitro.	Pubmed	0.0004838	1	0.02875	0.3324	2	3	CSNK2A1,CSNK2B
Pubmed	11439182	Activation of cardiac gene expression by myocardin, a transcriptional cofactor for serum response factor.	Pubmed	0.0004838	1	0.02875	0.3324	2	3	MRTFA,MYOCD
Pubmed	20428811	Wnt signaling may be activated in a subset of Peutz-Jeghers syndrome polyps closely correlating to LKB1 expression.	Pubmed	0.0004838	1	0.02875	0.3324	2	3	IFITM1,CTNNB1
Pubmed	24344199	Regulation of the follistatin gene by RSPO-LGR4 signaling via activation of the WNT/?-catenin pathway in skeletal myogenesis.	Pubmed	0.0004838	1	0.02875	0.3324	2	3	RSPO2,CTNNB1
Pubmed	15910632	Association between MspI polymorphism of the APO AI gene and Type 2 diabetes mellitus.	Pubmed	0.0004838	1	0.02875	0.3324	2	3	APOA1,APOA4
Pubmed	10212242	Stress-activated protein kinase-3 interacts with the PDZ domain of alpha1-syntrophin. A mechanism for specific substrate recognition.	Pubmed	0.0004838	1	0.02875	0.3324	2	3	MAPK12,SNTB1
Pubmed	10984616	Unique features of HIV-1 Rev protein phosphorylation by protein kinase CK2 ('casein kinase-2').	Pubmed	0.0004838	1	0.02875	0.3324	2	3	CSNK2A1,CSNK2B
Pubmed	6800944	Genetic control of cross-reactive cytotoxic T-lymphocyte responses to a BALB/c tumor.	Pubmed	0.0004838	1	0.02875	0.3324	2	3	ME1,APOA1
Pubmed	18519846	P-selectin glycoprotein ligand-1 is highly expressed on Ly-6Chi monocytes and a major determinant for Ly-6Chi monocyte recruitment to sites of atherosclerosis in mice.	Pubmed	0.0004838	1	0.02875	0.3324	2	3	APOE,CX3CR1
Pubmed	23017209	RBM5 promotes exon 4 skipping of AID pre-mRNA by competing with the binding of U2AF65 to the polypyrimidine tract.	Pubmed	0.0004838	1	0.02875	0.3324	2	3	AICDA,U2AF2
Pubmed	28330904	Autonomous TNF is critical for in vivo monocyte survival in steady state and inflammation.	Pubmed	0.0004838	1	0.02875	0.3324	2	3	CX3CR1,TNFRSF1A
Pubmed	15273694	Replication protein A interacts with AID to promote deamination of somatic hypermutation targets.	Pubmed	0.0004838	1	0.02875	0.3324	2	3	AICDA,RPA2
Pubmed	15024079	Brn-2 expression controls melanoma proliferation and is directly regulated by beta-catenin.	Pubmed	0.0004838	1	0.02875	0.3324	2	3	POU3F2,CTNNB1
Pubmed	17200157	Lack of pendrin HCO3- transport elevates vestibular endolymphatic [Ca2+] by inhibition of acid-sensitive TRPV5 and TRPV6 channels.	Pubmed	0.0004838	1	0.02875	0.3324	2	3	TRPV6,TRPV5
Pubmed	15579444	Deleting TCR alpha beta+ or CD4+ T lymphocytes leads to opposite effects on site-specific atherosclerosis in female apolipoprotein E-deficient mice.	Pubmed	0.0004838	1	0.02875	0.3324	2	3	APOE,CD4
Pubmed	21060874	Selective chemokine receptor usage by central nervous system myeloid cells in CCR2-red fluorescent protein knock-in mice.	Pubmed	0.0004838	1	0.02875	0.3324	2	3	APOE,CX3CR1
Pubmed	11470831	Identification and characterization of a novel extracellular matrix protein nephronectin that is associated with integrin alpha8beta1 in the embryonic kidney.	Pubmed	0.0004838	1	0.02875	0.3324	2	3	ITGA8,ITGA1
Pubmed	15364690	APOE and APOC1 promoter polymorphisms and the risk of Alzheimer disease in African American and Caribbean Hispanic individuals.	Pubmed	0.0004838	1	0.02875	0.3324	2	3	APOC1,APOE
Pubmed	28087665	NKG2D Promotes B1a Cell Development and Protection against Bacterial Infection.	Pubmed	0.0004838	1	0.02875	0.3324	2	3	HCST,CD79A
Pubmed	18184829	Differential role of nicotinic acetylcholine receptor subunits in physical and affective nicotine withdrawal signs.	Pubmed	0.0004838	1	0.02875	0.3324	2	3	CHRNA7,CHRNB2
Pubmed	16299394	eae36, a locus on mouse chromosome 4, controls susceptibility to experimental allergic encephalomyelitis in older mice and mice immunized in the winter.	Pubmed	0.0004838	1	0.02875	0.3324	2	3	PNRC2,CSF3R
Pubmed	23504261	Differential effects of AGS3 expression on D(2L) dopamine receptor-mediated adenylyl cyclase signaling.	Pubmed	0.0004838	1	0.02875	0.3324	2	3	ADCY2,DRD2
Pubmed	23264658	Focal adhesion kinase regulates the localization and retention of pro-B cells in bone marrow microenvironments.	Pubmed	0.0004838	1	0.02875	0.3324	2	3	PTK2,CD79A
Pubmed	10549869	Casein kinase II (CK-II)-mediated stimulation of HIV-1 reverse transcriptase activity and characterization of selective inhibitors in vitro.	Pubmed	0.0004838	1	0.02875	0.3324	2	3	CSNK2A1,CSNK2B
Pubmed	15066279	The protein kinase CK2 facilitates repair of chromosomal DNA single-strand breaks.	Pubmed	0.0004838	1	0.02875	0.3324	2	3	XRCC1,CSNK2A1
Pubmed	15066991	Apolipoprotein A-I-stimulated apolipoprotein E secretion from human macrophages is independent of cholesterol efflux.	Pubmed	0.0004838	1	0.02875	0.3324	2	3	APOA1,APOE
Pubmed	15760679	Involvement of TL1A and DR3 in induction of pro-inflammatory cytokines and matrix metalloproteinase-9 in atherogenesis.	Pubmed	0.0004838	1	0.02875	0.3324	2	3	MMP9,TNFRSF25
Pubmed	19137635	Complement 4 phenotypes and genotypes in Brazilian patients with classical 21-hydroxylase deficiency.	Pubmed	0.0004838	1	0.02875	0.3324	2	3	CYP21A2,C4A
Pubmed	16337946	Pinpointing phosphotyrosine-dependent interactions downstream of the collagen receptor DDR1.	Pubmed	0.0004838	1	0.02875	0.3324	2	3	NCK2,DDR1
Pubmed	23727580	Tubulin polymerization promoting protein 1 (TPPP1) increases ?-catenin expression through inhibition of HDAC6 activity in U2OS osteosarcoma cells.	Pubmed	0.0004838	1	0.02875	0.3324	2	3	CTNNB1,TPPP
Pubmed	10515158	Detecting genes in new and old mouse models for epilepsy: a prospectus through the magnifying glass.	Pubmed	0.0004838	1	0.02875	0.3324	2	3	SLC9A1,CACNA1A
Pubmed	27605668	Up-regulation of N-cadherin by Collagen I-activated Discoidin Domain Receptor 1 in Pancreatic Cancer Requires the Adaptor Molecule Shc1.	Pubmed	0.0004838	1	0.02875	0.3324	2	3	SHC1,DDR1
Pubmed	28604719	Essential role for GABARAP autophagy proteins in interferon-inducible GTPase-mediated host defense.	Pubmed	0.0004838	1	0.02875	0.3324	2	3	GABARAP,GABARAPL1
Pubmed	19487295	Genomic profiling of microRNAs in bladder cancer: miR-129 is associated with poor outcome and promotes cell death in vitro.	Pubmed	0.0004838	1	0.02875	0.3324	2	3	SOX4,GALNT1
Pubmed	16763551	Calbindin-D28K dynamically controls TRPV5-mediated Ca2+ transport.	Pubmed	0.0004838	1	0.02875	0.3324	2	3	TRPV6,TRPV5
Pubmed	15962178	APOA1/C3/A4 gene cluster variability and lipid levels in Brazilian children.	Pubmed	0.0004838	1	0.02875	0.3324	2	3	APOA1,APOA4
Pubmed	28888955	Distinct roles of neuronal and microglial CB2 cannabinoid receptors in the mouse hippocampus.	Pubmed	0.0004838	1	0.02875	0.3324	2	3	CNR2,CX3CR1
Pubmed	18078695	APOE, ACT and CHRNA7 genes in the conversion from amnestic mild cognitive impairment to Alzheimer's disease.	Pubmed	0.0004838	1	0.02875	0.3324	2	3	CHRNA7,APOE
Pubmed	17975299	Sorl1 as an Alzheimer's disease predisposition gene?	Pubmed	0.0004838	1	0.02875	0.3324	2	3	APOC1,APOE
Pubmed	18363853	Dopaminergic and brain-derived neurotrophic factor signalling in inbred mice exposed to a restricted feeding schedule.	Pubmed	0.0004838	1	0.02875	0.3324	2	3	SLC6A3,DRD2
Pubmed	25511181	Under-expression of ?8 integrin aggravates experimental atherosclerosis.	Pubmed	0.0004838	1	0.02875	0.3324	2	3	ITGA8,APOE
Pubmed	26221034	Identification and Characterization of CD300H, a New Member of the Human CD300 Immunoreceptor Family.	Pubmed	0.0004838	1	0.02875	0.3324	2	3	TYROBP,HCST
Pubmed	22336124	[Effects of focal adhesional kinase signaling on TNF-? induced gelatinases activity in cornea epithelium].	Pubmed	0.0004838	1	0.02875	0.3324	2	3	MMP9,PTK2
Pubmed	16887996	Vav1 controls DAP10-mediated natural cytotoxicity by regulating actin and microtubule dynamics.	Pubmed	0.0004838	1	0.02875	0.3324	2	3	TYROBP,HCST
Pubmed	19643942	Systemic inflammatory markers in COPD: results from the Bergen COPD Cohort Study.	Pubmed	0.0004838	1	0.02875	0.3324	2	3	TNFRSF11B,TNFRSF1A
Pubmed	22231735	Sox4 functions as a positive regulator of ?-catenin signaling through upregulation of TCF4 during morular differentiation of endometrial carcinomas.	Pubmed	0.0004838	1	0.02875	0.3324	2	3	CTNNB1,SOX4
Pubmed	23825366	Myocardin regulates vascular response to injury through miR-24/-29a and platelet-derived growth factor receptor-?.	Pubmed	0.0004838	1	0.02875	0.3324	2	3	APOE,MYOCD
Pubmed	8548340	Functional analysis of the phosphorylation sites on the human immunodeficiency virus type 1 Vpu protein.	Pubmed	0.0004838	1	0.02875	0.3324	2	3	CSNK2A1,CSNK2B
Pubmed	20974182	Role of mouse cerebellar nicotinic acetylcholine receptor (nAChR) ?(4)?(2)- and ?(7) subtypes in the behavioral cross-tolerance between nicotine and ethanol-induced ataxia.	Pubmed	0.0004838	1	0.02875	0.3324	2	3	CHRNA7,CHRNB2
Pubmed	20472610	Downregulation of Fzd6 and Cthrc1 and upregulation of olfactory receptors and protocadherins by dietary beta-carotene in lungs of Bcmo1-/- mice.	Pubmed	0.0004838	1	0.02875	0.3324	2	3	FZD6,CTHRC1
Pubmed	11388660	Polymorphism of apoprotein E (APOE), methylenetetrahydrofolate reductase (MTHFR) and paraoxonase (PON1) genes in patients with cerebrovascular disease.	Pubmed	0.0004838	1	0.02875	0.3324	2	3	PON1,APOE
Pubmed	24710939	Influences of IL-6R antibody on PMMA bone cement-mediated expression of OPG and RANKL in synovial fibroblasts.	Pubmed	0.0004838	1	0.02875	0.3324	2	3	IL6R,TNFRSF11B
Pubmed	26004508	Kdm2a/b Lysine Demethylases Regulate Canonical Wnt Signaling by Modulating the Stability of Nuclear ?-Catenin.	Pubmed	0.0004838	1	0.02875	0.3324	2	3	KDM2A,CTNNB1
Pubmed	20628574	Partial loss of ataxin-1 function contributes to transcriptional dysregulation in spinocerebellar ataxia type 1 pathogenesis.	Pubmed	0.0004838	1	0.02875	0.3324	2	3	ATXN1,CIC
Pubmed	26845027	Tankyrases Promote Homologous Recombination and Check Point Activation in Response to DSBs.	Pubmed	0.0004838	1	0.02875	0.3324	2	3	MDC1,TNKS2
Pubmed	3931073	Apolipoprotein multigene family: tandem organization of human apolipoprotein AI, CIII, and AIV genes.	Pubmed	0.0004838	1	0.02875	0.3324	2	3	APOA1,APOA4
Pubmed	19922080	Age-dependent changes in the expression of klotho protein, TRPV5 and TRPV6 in mouse inner ear.	Pubmed	0.0004838	1	0.02875	0.3324	2	3	TRPV6,TRPV5
Pubmed	15004164	B cells are crucial for both development and maintenance of the splenic marginal zone.	Pubmed	0.0004838	1	0.02875	0.3324	2	3	CD27,CD79A
Pubmed	24520415	Polymorphisms of mouse apolipoprotein A-II alter its physical and functional nature.	Pubmed	0.0004838	1	0.02875	0.3324	2	3	APOA1,APOE
Pubmed	25939383	Disruption of Wnt/?-Catenin Signaling and Telomeric Shortening Are Inextricable Consequences of Tankyrase Inhibition in Human Cells.	Pubmed	0.0004838	1	0.02875	0.3324	2	3	CTNNB1,TNKS2
Pubmed	7768894	Interactions between the subunits of casein kinase II.	Pubmed	0.0004838	1	0.02875	0.3324	2	3	CSNK2A1,CSNK2B
Pubmed	25187620	R-spondin1, WNT4, and the CTNNB1 signaling pathway: strict control over ovarian differentiation.	Pubmed	0.0004838	1	0.02875	0.3324	2	3	CTNNB1,RSPO1
Pubmed	16520487	Active plasma phospholipid transfer protein is associated with apoA-I- but not apoE-containing lipoproteins.	Pubmed	0.0004838	1	0.02875	0.3324	2	3	APOA1,APOE
Pubmed	10964683	Biochemical characterization of casein kinase II as a protein kinase responsible for stimulation of HIV-1 protease in vitro.	Pubmed	0.0004838	1	0.02875	0.3324	2	3	CSNK2A1,CSNK2B
Pubmed	15269218	Deficiency of ABCA1 impairs apolipoprotein E metabolism in brain.	Pubmed	0.0004838	1	0.02875	0.3324	2	3	APOA1,APOE
Pubmed	8349691	Phosphorylation of the insulin receptor substrate IRS-1 by casein kinase II.	Pubmed	0.0004838	1	0.02875	0.3324	2	3	CSNK2A1,CSNK2B
Pubmed	23785401	Association of genetic markers with CSF oligoclonal bands in multiple sclerosis patients.	Pubmed	0.0004838	1	0.02875	0.3324	2	3	KLHL32,MMS22L
Pubmed	26562283	A New Role Discovered for a Well-Known Clock Protein.	Pubmed	0.0004838	1	0.02875	0.3324	2	3	CSNK2A1,CSNK2B
Pubmed	19956853	Loss of liver-intestine cadherin in human intrahepatic cholangiocarcinoma promotes angiogenesis by up-regulating metal-responsive transcription factor-1 and placental growth factor.	Pubmed	0.0004838	1	0.02875	0.3324	2	3	MTF1,CDH17
Pubmed	8088778	The apolipoprotein C2-linked (Acl) gene: a new gene within the mouse apolipoprotein e-c1-c2 gene cluster.	Pubmed	0.0004838	1	0.02875	0.3324	2	3	APOC2,APOE
Pubmed	15304365	Human apoA-I/C-III/A-IV gene cluster transgenic rabbits: effects of a high-cholesterol diet.	Pubmed	0.0004838	1	0.02875	0.3324	2	3	APOA1,APOA4
Pubmed	12535606	Expression and characterization of the FXYD ion transport regulators for NMR structural studies in lipid micelles and lipid bilayers.	Pubmed	0.0004838	1	0.02875	0.3324	2	3	FXYD1,FXYD3
Pubmed	4020294	Inhibitory effects of C apolipoproteins from rats and humans on the uptake of triglyceride-rich lipoproteins and their remnants by the perfused rat liver.	Pubmed	0.0004838	1	0.02875	0.3324	2	3	APOC1,APOC2
Pubmed	3856857	Multiple duplications of complement C4 gene correlate with H-2-controlled testosterone-independent expression of its sex-limited isoform, C4-Slp.	Pubmed	0.0004838	1	0.02875	0.3324	2	3	CYP21A2,C4A
Pubmed	15158073	Sensory deficits in mice hypomorphic for a mammalian homologue of unc-53.	Pubmed	0.0004838	1	0.02875	0.3324	2	3	NAV3,NAV2
Pubmed	1918990	The murine Slp gene. Additional evidence that sex-limited protein has no biologic function.	Pubmed	0.0004838	1	0.02875	0.3324	2	3	CYP21A2,C4A
Pubmed	11150348	Prepulse inhibition deficits and perseverative motor patterns in dopamine transporter knock-out mice: differential effects of D1 and D2 receptor antagonists.	Pubmed	0.0004838	1	0.02875	0.3324	2	3	SLC6A3,DRD2
Pubmed	15269224	Regulation of SHP-1 tyrosine phosphatase in human platelets by serine phosphorylation at its C terminus.	Pubmed	0.0004838	1	0.02875	0.3324	2	3	NR0B2,PTPN6
Pubmed	21247255	Dopaminergic system genes in childhood aggression: possible role for DRD2.	Pubmed	0.0004838	1	0.02875	0.3324	2	3	SLC6A3,DRD2
Pubmed	18971423	CX3CR1 is required for monocyte homeostasis and atherogenesis by promoting cell survival.	Pubmed	0.0004838	1	0.02875	0.3324	2	3	APOE,CX3CR1
Pubmed	24165468	Soluble TNF and IL-6 receptors: indicators of vascular health in women without cardiovascular disease.	Pubmed	0.0004838	1	0.02875	0.3324	2	3	IL6R,TNFRSF1A
Pubmed	17304721	[Polymorphisms in the genes of cytochrome oxidase P450 2D6 (CYP2D6), paraoxonase 1 (PON1) and apolipoprotein E (APOE) as risk factors for Parkinson's disease].	Pubmed	0.0004838	1	0.02875	0.3324	2	3	PON1,APOE
Pubmed	28123022	TNF-? Differentially Regulates Synaptic Plasticity in the Hippocampus and Spinal Cord by Microglia-Dependent Mechanisms after Peripheral Nerve Injury.	Pubmed	0.0004838	1	0.02875	0.3324	2	3	CX3CR1,TNFRSF1A
Pubmed	22113132	Role of genetic polymorphisms of the dopaminergic system in Parkinson's disease patients with impulse control disorders.	Pubmed	0.0004838	1	0.02875	0.3324	2	3	SLC6A3,DRD2
Pubmed	9645944	Functional association of nuclear protein 4.1 with pre-mRNA splicing factors.	Pubmed	0.0004838	1	0.02875	0.3324	2	3	U2AF2,EPB41
Pubmed	12220519	Heat-shock protein 90 complexes in resting and thrombin-activated platelets.	Pubmed	0.0004838	1	0.02875	0.3324	2	3	CSNK2A1,CSNK2B
Pubmed	29208674	Molecular moieties masking Ca2+-dependent facilitation of voltage-gated Cav2.2 Ca2+ channels.	Pubmed	0.0004838	1	0.02875	0.3324	2	3	CACNA1A,CACNA1B
Pubmed	17391060	HIRIP3 is a nuclear phosphoprotein interacting with and phosphorylated by the serine-threonine kinase CK2.	Pubmed	0.0004838	1	0.02875	0.3324	2	3	CSNK2A1,CSNK2B
Pubmed	14607889	Cutting edge: IL-16/CD4 preferentially induces Th1 cell migration: requirement of CCR5.	Pubmed	0.0004838	1	0.02875	0.3324	2	3	IL16,CD4
Pubmed	21750988	Adiponectin receptor 1 interacts with both subunits of protein kinase CK2.	Pubmed	0.0004838	1	0.02875	0.3324	2	3	CSNK2A1,CSNK2B
Pubmed	18000745	Structures of the FXYD regulatory proteins in lipid micelles and membranes.	Pubmed	0.0004838	1	0.02875	0.3324	2	3	FXYD1,FXYD3
Pubmed	24940650	Interaction of plectin with keratins 5 and 14: dependence on several plectin domains and keratin quaternary structure.	Pubmed	0.0004838	1	0.02875	0.3324	2	3	PLEC,KRT5
Pubmed	23963056	The association study of polymorphisms in DAT, DRD2, and COMT genes and acute extrapyramidal adverse effects in male schizophrenic patients treated with haloperidol.	Pubmed	0.0004838	1	0.02875	0.3324	2	3	SLC6A3,DRD2
Pubmed	12571228	Negative regulation of beta-catenin signaling by tyrosine phosphatase SHP-1 in intestinal epithelial cells.	Pubmed	0.0004838	1	0.02875	0.3324	2	3	CTNNB1,PTPN6
Pubmed	25163657	FAK is required for c-Met/?-catenin-driven hepatocarcinogenesis.	Pubmed	0.0004838	1	0.02875	0.3324	2	3	CTNNB1,PTK2
Pubmed	26904940	The Spindle Assembly Checkpoint Is Not Essential for Viability of Human Cells with Genetically Lowered APC/C Activity.	Pubmed	0.0004838	1	0.02875	0.3324	2	3	UBE2S,UBE2C
Pubmed	22639229	Comparison of the D2 receptor regulation and neurotoxicant susceptibility of nigrostriatal dopamine neurons in wild-type and CB1/CB2 receptor knockout mice.	Pubmed	0.0004838	1	0.02875	0.3324	2	3	CNR2,DRD2
Pubmed	18340469	Further examination of the candidate genes in chromosome 12p13 locus for late-onset Alzheimer disease.	Pubmed	0.0004838	1	0.02875	0.3324	2	3	GAPDH,NCAPD2
Pubmed	12419962	Adhesive defect in extracellular matrix tenascin-X-null fibroblasts: a possible mechanism of tumor invasion.	Pubmed	0.0004838	1	0.02875	0.3324	2	3	MMP9,TNXB
Pubmed	22084441	Rat and mouse CD94 associate directly with the activating transmembrane adaptor proteins DAP12 and DAP10 and activate NK cell cytotoxicity.	Pubmed	0.0004838	1	0.02875	0.3324	2	3	TYROBP,HCST
Pubmed	28631187	Serine peptidase inhibitor Kazal type 1 (SPINK1) as novel downstream effector of the cadherin-17/?-catenin axis in hepatocellular carcinoma.	Pubmed	0.0004838	1	0.02875	0.3324	2	3	CTNNB1,CDH17
Pubmed	10692439	Cardiovascular basic helix loop helix factor 1, a novel transcriptional repressor expressed preferentially in the developing and adult cardiovascular system.	Pubmed	0.0004838	1	0.02875	0.3324	2	3	ARNT,HEY1
Pubmed	7491787	The human immunodeficiency virus type 1 Vpu protein: a potential regulator of proteolysis and protein transport in the mammalian secretory pathway.	Pubmed	0.0004838	1	0.02875	0.3324	2	3	CSNK2A1,CSNK2B
Pubmed	27572318	RSPOs facilitated HSC activation and promoted hepatic fibrogenesis.	Pubmed	0.0004838	1	0.02875	0.3324	2	3	RSPO2,RSPO1
Pubmed	18835279	Structural basis of beta-catenin recognition by Tax-interacting protein-1.	Pubmed	0.0004838	1	0.02875	0.3324	2	3	CTNNB1,TAX1BP1
Pubmed	7539038	Identification of the tyrosine phosphatase PTP1C as a B cell antigen receptor-associated protein involved in the regulation of B cell signaling.	Pubmed	0.0004838	1	0.02875	0.3324	2	3	PTPN6,CD79A
Pubmed	16526040	The effect of dopamine D2, D5 receptor and transporter (SLC6A3) polymorphisms on the cue-elicited heroin craving in Chinese.	Pubmed	0.0004838	1	0.02875	0.3324	2	3	SLC6A3,DRD2
Pubmed	10229823	The NKR-P1B gene product is an inhibitory receptor on SJL/J NK cells.	Pubmed	0.0004838	1	0.02875	0.3324	2	3	NR0B2,PTPN6
Pubmed	12798568	Hepatic lipase mutations,elevated high-density lipoprotein cholesterol, and increased risk of ischemic heart disease: the Copenhagen City Heart Study.	Pubmed	0.0004838	1	0.02875	0.3324	2	3	APOA1,APOE
Pubmed	17982463	Extralymphatic virus sanctuaries as a consequence of potent T-cell activation.	Pubmed	0.0004838	1	0.02875	0.3324	2	3	AICDA,CD4
Pubmed	12062803	Pore membrane and/or filament interacting like protein 1 (POMFIL1) is predominantly expressed in the nervous system and encodes different protein isoforms.	Pubmed	0.0004838	1	0.02875	0.3324	2	3	NAV3,NAV2
Pubmed	11472750	Excess coronary heart disease in Familial Combined Hyperlipidemia, in relation to genetic factors and central obesity.	Pubmed	0.0004838	1	0.02875	0.3324	2	3	APOA1,APOA4
Pubmed	18976728	Genome-wide association analysis reveals putative Alzheimer's disease susceptibility loci in addition to APOE.	Pubmed	0.0004838	1	0.02875	0.3324	2	3	APOC1,APOE
Pubmed	15601948	Impaired synaptic function in the microglial KARAP/DAP12-deficient mouse.	Pubmed	0.0004838	1	0.02875	0.3324	2	3	TYROBP,AIF1
Pubmed	7411019	An autosomal dominant gene regulates the extent of 9-O-acetylation of murine erythrocyte sialic acids. A probable explanation for the variation in capacity to activate the human alternate complement pathway.	Pubmed	0.0004838	1	0.02875	0.3324	2	3	ME1,APOA1
Pubmed	28377503	C-terminal splice variants of P/Q-type Ca(2+) channel CaV2.1 ?1 subunits are differentially regulated by Rab3-interacting molecule proteins.	Pubmed	0.0004838	1	0.02875	0.3324	2	3	RIMS2,CACNA1A
Pubmed	25964115	Association of elevated apoA-I glycation and reduced HDL-associated paraoxonase1, 3 activity, and their interaction with angiographic severity of coronary artery disease in patients with type 2 diabetes mellitus.	Pubmed	0.0004838	1	0.02875	0.3324	2	3	PON1,APOA1
Pubmed	19104650	Leishmania-induced IRAK-1 inactivation is mediated by SHP-1 interacting with an evolutionarily conserved KTIM motif.	Pubmed	0.0004838	1	0.02875	0.3324	2	3	NR0B2,PTPN6
Pubmed	17175058	Polymorphisms of dopamine receptor/transporter genes and risk of non-small cell lung cancer.	Pubmed	0.0004838	1	0.02875	0.3324	2	3	SLC6A3,DRD2
Pubmed	15805114	Differential trafficking of GluR7 kainate receptor subunit splice variants.	Pubmed	0.0004838	1	0.02875	0.3324	2	3	GRIK2,GRIK3
Pubmed	21559372	IL-6 stabilizes Twist and enhances tumor cell motility in head and neck cancer cells through activation of casein kinase 2.	Pubmed	0.0004838	1	0.02875	0.3324	2	3	TWIST1,CSNK2A1
Pubmed	18434921	Genetic variation in dopamine pathways differentially associated with smoking progression in adolescence.	Pubmed	0.0004838	1	0.02875	0.3324	2	3	SLC6A3,DRD2
Pubmed	16533817	Aminopeptidase N (CD13) regulates tumor necrosis factor-alpha-induced apoptosis in human neutrophils.	Pubmed	0.0004838	1	0.02875	0.3324	2	3	ANPEP,TNFRSF1A
Pubmed	19911804	Macrophage scavenger receptor A mediates adhesion to apolipoproteins A-I and E.	Pubmed	0.0004838	1	0.02875	0.3324	2	3	APOA1,APOE
Pubmed	12527891	Protein kinase CK2 regulates CDC25B phosphatase activity.	Pubmed	0.0004838	1	0.02875	0.3324	2	3	CSNK2A1,CSNK2B
Pubmed	26660426	Essential control of early B-cell development by Mef2 transcription factors.	Pubmed	0.0004838	1	0.02875	0.3324	2	3	MEF2D,CD79A
Pubmed	20810658	Starch binding domain-containing protein 1/genethonin 1 is a novel participant in glycogen metabolism.	Pubmed	0.0004838	1	0.02875	0.3324	2	3	GABARAP,GABARAPL1
Pubmed	9571630	Characterization of protein interaction among subunits of protein kinase CKII in vivo and in vitro.	Pubmed	0.0004838	1	0.02875	0.3324	2	3	CSNK2A1,CSNK2B
Pubmed	25175499	The cytoplasmic domain of N-cadherin modulates MMP?9 induction in oral squamous carcinoma cells.	Pubmed	0.0004838	1	0.02875	0.3324	2	3	MMP9,CTNNB1
Pubmed	25627682	Coiled-coil coactivators play a structural role mediating interactions in hypoxia-inducible factor heterodimerization.	Pubmed	0.0004838	1	0.02875	0.3324	2	3	TACC3,ARNT
Pubmed	18186541	Structural consequences of phosphorylation of two serine residues in the cytoplasmic domain of HIV-1 VpU.	Pubmed	0.0004838	1	0.02875	0.3324	2	3	CSNK2A1,CSNK2B
Pubmed	21754978	Increased CK5/CK8-positive intermediate cells with stromal smooth muscle cell atrophy in the mice lacking prostate epithelial androgen receptor.	Pubmed	0.0004838	1	0.02875	0.3324	2	3	KRT5,KRT8
Pubmed	26213366	Stabilization of intracellular trafficking and metabolism of amyloid ?-protein precursor and Alcadein ? by apolipoprotein E.	Pubmed	0.0004838	1	0.02875	0.3324	2	3	APOE,CLSTN3
Pubmed	29081378	TNF? blockade mediates bone protection in antigen-induced arthritis by reducing osteoclast precursor supply.	Pubmed	0.0004838	1	0.02875	0.3324	2	3	CX3CR1,TNFRSF1A
Pubmed	22885098	Unexpected contribution of cytochrome P450 enzymes CYP11B2 and CYP21, as well as CYP3A4 in xenobiotic androgen elimination - insights from metandienone metabolism.	Pubmed	0.0004838	1	0.02875	0.3324	2	3	CYP11B2,CYP21A2
Pubmed	25639486	Tumour suppressor TRIM33 targets nuclear ?-catenin degradation.	Pubmed	0.0004838	1	0.02875	0.3324	2	3	PRKCG,CTNNB1
Pubmed	12820654	The human genome encodes 10 alpha-crystallin-related small heat shock proteins: HspB1-10.	Pubmed	0.0004838	1	0.02875	0.3324	2	3	HSPB6,HSPB9
Pubmed	15488874	A prospective study of the APOA1 XmnI and APOC3 SstI polymorphisms in the APOA1/C3/A4 gene cluster and risk of incident myocardial infarction in men.	Pubmed	0.0004838	1	0.02875	0.3324	2	3	APOA1,APOA4
Pubmed	12925893	A major locus conferring susceptibility to infection by Streptococcus pneumoniae in mice.	Pubmed	0.0004838	1	0.02875	0.3324	2	3	TYROBP,HCST
Pubmed	14595002	Influence of apoA-I and apoE on the formation of serum amyloid A-containing lipoproteins in vivo and in vitro.	Pubmed	0.0004838	1	0.02875	0.3324	2	3	APOA1,APOE
Pubmed	22916279	Fractalkine is expressed in early and advanced atherosclerotic lesions and supports monocyte recruitment via CX3CR1.	Pubmed	0.0004838	1	0.02875	0.3324	2	3	APOE,CX3CR1
Pubmed	1541298	Human-immunodeficiency-virus-type-1-encoded Vpu protein is phosphorylated by casein kinase II.	Pubmed	0.0004838	1	0.02875	0.3324	2	3	CSNK2A1,CSNK2B
Pubmed	21388957	Effects of C-terminal modifications of GEC1 protein and gamma-aminobutyric acid type A (GABA(A)) receptor-associated protein (GABARAP), two microtubule-associated proteins, on kappa opioid receptor expression.	Pubmed	0.0004838	1	0.02875	0.3324	2	3	GABARAP,GABARAPL1
Pubmed	28893556	The ILK-MMP9-MRTF axis is crucial for EndMT differentiation of endothelial cells in a tumor microenvironment.	Pubmed	0.0004838	1	0.02875	0.3324	2	3	MMP9,MRTFA
Pubmed	27291418	A molecular determinant of phosphoinositide affinity in mammalian TRPV channels.	Pubmed	0.0004838	1	0.02875	0.3324	2	3	TRPV6,TRPV5
Pubmed	24897117	Frizzled 7 expression is positively regulated by SIRT1 and ?-catenin in breast cancer cells.	Pubmed	0.0004838	1	0.02875	0.3324	2	3	FZD7,CTNNB1
Pubmed	19573576	Specific subtypes of nicotinic cholinergic receptors involved in sympathetic and parasympathetic cardiovascular responses.	Pubmed	0.0004838	1	0.02875	0.3324	2	3	CHRNA7,CHRNB2
Pubmed	18025128	The healing myocardium sequentially mobilizes two monocyte subsets with divergent and complementary functions.	Pubmed	0.0004838	1	0.02875	0.3324	2	3	APOE,CX3CR1
Pubmed	19526105	Clinical significance of levels of molecular biological markers in zones of invasive front-line of colorectal cancer.	Pubmed	0.0004838	1	0.02875	0.3324	2	3	MMP9,CTNNB1
Pubmed	20219016	SKAP2, a novel target of HSF4b, associates with NCK2/F-actin at membrane ruffles and regulates actin reorganization in lens cell.	Pubmed	0.0004838	1	0.02875	0.3324	2	3	NCK2,SKAP2
Pubmed	12059039	Upregulation of neuronal nicotinic receptor subunits alpha4, beta2, and alpha7 in transgenic mice overexpressing human acetylcholinesterase.	Pubmed	0.0004838	1	0.02875	0.3324	2	3	CHRNA7,CHRNB2
Pubmed	18451111	PX-RICS mediates ER-to-Golgi transport of the N-cadherin/beta-catenin complex.	Pubmed	0.0004838	1	0.02875	0.3324	2	3	GABARAP,GABARAPL1
Pubmed	19309018	Genetic polymorphisms in the DRD2, DRD3, and SLC6A3 gene in elderly patients with delirium.	Pubmed	0.0004838	1	0.02875	0.3324	2	3	SLC6A3,DRD2
Pubmed	17654295	Pharmacogenetic clinical trial of sustained-release bupropion for smoking cessation.	Pubmed	0.0004838	1	0.02875	0.3324	2	3	SLC6A3,DRD2
Pubmed	19766158	Genetic polymorphisms in the dopamine-2 receptor (DRD2), dopamine-3 receptor (DRD3), and dopamine transporter (SLC6A3) genes in schizophrenia: Data from an association study.	Pubmed	0.0004838	1	0.02875	0.3324	2	3	SLC6A3,DRD2
Pubmed	11827178	Visualization and molecular analysis of nuclear import of protein kinase CK2 subunits in living cells.	Pubmed	0.0004838	1	0.02875	0.3324	2	3	CSNK2A1,CSNK2B
Pubmed	9880586	Kainate receptor-mediated responses in the CA1 field of wild-type and GluR6-deficient mice.	Pubmed	0.0004838	1	0.02875	0.3324	2	3	GRIK2,GRIK3
Pubmed	9191109	Opioidergic and dopaminergic gene expression in the caudate-putamen and accumbens of the mutant mouse, tottering (tg/tg).	Pubmed	0.0004838	1	0.02875	0.3324	2	3	CACNA1A,DRD2
Pubmed	17120049	Contributions of the DAT1 and DRD2 genes to serious and violent delinquency among adolescents and young adults.	Pubmed	0.0004838	1	0.02875	0.3324	2	3	SLC6A3,DRD2
Pubmed	11827177	Localization of individual subunits of protein kinase CK2 to the endoplasmic reticulum and to the Golgi apparatus.	Pubmed	0.0004838	1	0.02875	0.3324	2	3	CSNK2A1,CSNK2B
Pubmed	26661731	ApoA1, ApoJ and ApoE Plasma Levels and Genotype Frequencies in Cerebral Amyloid Angiopathy.	Pubmed	0.0004838	1	0.02875	0.3324	2	3	APOA1,APOE
Pubmed	12189247	A novel angiogenic pathway mediated by non-neuronal nicotinic acetylcholine receptors.	Pubmed	0.0004838	1	0.02875	0.3324	2	3	CHRNA7,CHRNB2
Pubmed	17261136	Apolipoprotein AI-CIII-AIV gene cluster polymorphisms in relation to cholesterol gallstone.	Pubmed	0.0004838	1	0.02875	0.3324	2	3	APOA1,APOA4
Pubmed	24130178	Ocular phenotype of Fbn2-null mice.	Pubmed	0.0004838	1	0.02875	0.3324	2	3	MFAP2,MFAP5
Pubmed	19917453	Reduction of serum lipids by soy protein and soluble fiber is not associated with the ABCG5/G8, apolipoprotein E, and apolipoprotein A1 polymorphisms in a group of hyperlipidemic Mexican subjects.	Pubmed	0.0004838	1	0.02875	0.3324	2	3	APOA1,APOE
Pubmed	22698400	Inactivation of the deubiquitinase CYLD in hepatocytes causes apoptosis, inflammation, fibrosis, and cancer.	Pubmed	0.0004838	1	0.02875	0.3324	2	3	CYLD,TNFRSF1A
Pubmed	20421368	Aging-related atherosclerosis is exacerbated by arterial expression of tumor necrosis factor receptor-1: evidence from mouse models and human association studies.	Pubmed	0.0004838	1	0.02875	0.3324	2	3	APOE,TNFRSF1A
Pubmed	16537540	Fox-2 splicing factor binds to a conserved intron motif to promote inclusion of protein 4.1R alternative exon 16.	Pubmed	0.0004838	1	0.02875	0.3324	2	3	RBFOX1,EPB41
Pubmed	7387621	Genetic analysis of protein variations in Mus musculus using two-dimensional electrophoresis.	Pubmed	0.0004838	1	0.02875	0.3324	2	3	APOA1,CA2
Pubmed	26802470	Icariin inhibits atherosclerosis progress in Apoe null mice by downregulating CX3CR1 in macrophage.	Pubmed	0.0004838	1	0.02875	0.3324	2	3	APOE,CX3CR1
Pubmed	18227067	Role of S3 and S4 transmembrane domain charged amino acids in channel biogenesis and gating of KCa2.3 and KCa3.1.	Pubmed	0.0004838	1	0.02875	0.3324	2	3	DERL1,KCNN4
Pubmed	10944435	Phosphorylation of AZT-resistant human immunodeficiency virus type 1 reverse transcriptase by casein kinase II in vitro: effects on inhibitor sensitivity.	Pubmed	0.0004838	1	0.02875	0.3324	2	3	CSNK2A1,CSNK2B
Pubmed	19845507	Identification of the key structural motifs involved in HspB8/HspB6-Bag3 interaction.	Pubmed	0.0004838	1	0.02875	0.3324	2	3	HSPB6,HSPB8
Pubmed	18086883	Phosphorylation by casein kinase 2 regulates Nap1 localization and function.	Pubmed	0.0004838	1	0.02875	0.3324	2	3	CSNK2A1,CSNK2B
Pubmed	21324458	Association of gene variants with lipid levels in response to fenofibrate is influenced by metabolic syndrome status.	Pubmed	0.0004838	1	0.02875	0.3324	2	3	APOA4,APOE
Pubmed	22086927	Thromboxane receptor signaling is required for fibronectin-induced matrix metalloproteinase 9 production by human and murine macrophages and is attenuated by the Arhgef1 molecule.	Pubmed	0.0004838	1	0.02875	0.3324	2	3	MMP9,ARHGEF1
Pubmed	17654446	The ApoAI-CIII-AIV gene cluster and its relation to lipid levels in type 2 diabetes mellitus and coronary heart disease: determination of a novel susceptible haplotype.	Pubmed	0.0004838	1	0.02875	0.3324	2	3	APOA1,APOA4
Pubmed	12569158	Decreased atherosclerosis in CX3CR1-/- mice reveals a role for fractalkine in atherogenesis.	Pubmed	0.0004838	1	0.02875	0.3324	2	3	APOE,CX3CR1
Pubmed	23066022	Studies on the substrate and stereo/regioselectivity of adipose triglyceride lipase, hormone-sensitive lipase, and diacylglycerol-O-acyltransferases.	Pubmed	0.0004838	1	0.02875	0.3324	2	3	DGAT1,LIPE
Pubmed	15469841	R-Spondin2 is a secreted activator of Wnt/beta-catenin signaling and is required for Xenopus myogenesis.	Pubmed	0.0004838	1	0.02875	0.3324	2	3	RSPO2,RSPO1
Pubmed	12902976	Modulation of human checkpoint kinase Chk1 by the regulatory beta-subunit of protein kinase CK2.	Pubmed	0.0004838	1	0.02875	0.3324	2	3	CSNK2A1,CSNK2B
Pubmed	17980631	Antagonistic interactions between Ikaros and the chromatin remodeler Mi-2beta determine silencer activity and Cd4 gene expression.	Pubmed	0.0004838	1	0.02875	0.3324	2	3	CHD4,CD4
Pubmed	19179402	R-Spondin1 protects mice from chemotherapy or radiation-induced oral mucositis through the canonical Wnt/beta-catenin pathway.	Pubmed	0.0004838	1	0.02875	0.3324	2	3	CTNNB1,RSPO1
Pubmed	21767760	Association of a DNA polymorphism of the apolipoprotein AI-CIII-AIV gene cluster with myocardial infarction in a Tunisian population.	Pubmed	0.0004838	1	0.02875	0.3324	2	3	APOA1,APOA4
Pubmed	17135598	No evidence for a major role of polymorphisms during bupropion treatment.	Pubmed	0.0004838	1	0.02875	0.3324	2	3	SLC6A3,DRD2
Pubmed	19152006	New genetic evidence for involvement of the dopamine system in migraine with aura.	Pubmed	0.0004838	1	0.02875	0.3324	2	3	SLC6A3,DRD2
Pubmed	29202462	Paracrine osteoprotegerin and ?-catenin stabilization support synovial sarcomagenesis in periosteal cells.	Pubmed	0.0004838	1	0.02875	0.3324	2	3	CTNNB1,TNFRSF11B
Pubmed	9892355	GABA(A)-receptor-associated protein links GABA(A) receptors and the cytoskeleton.	Pubmed	0.0004838	1	0.02875	0.3324	2	3	GABARAP,GABARAPL1
Pubmed	23771909	Upregulation of skeletal muscle inflammatory genes links inflammation with insulin resistance in women with the metabolic syndrome.	Pubmed	0.0004838	1	0.02875	0.3324	2	3	IL6R,HDAC9
Pubmed	28671020	The Wnt/?-catenin and PI3K/Akt signaling pathways promote EMT in gastric cancer by epigenetic regulation via H3 lysine 27 acetylation.	Pubmed	0.0004838	1	0.02875	0.3324	2	3	TWIST1,CTNNB1
Pubmed	20209647	BER gene polymorphisms (OGG1 Ser326Cys and XRCC1 Arg194Trp) and modulation of DNA damage due to pesticides exposure.	Pubmed	0.0004838	1	0.02875	0.3324	2	3	PON1,XRCC1
Pubmed	12102635	Sequencing of full-length cDNA encoding the alpha and beta subunits of human casein kinase II from human platelets and megakaryocytic cells. Expression of the casein kinase IIalpha intronless gene in a megakaryocytic cell line.	Pubmed	0.0004838	1	0.02875	0.3324	2	3	CSNK2A1,CSNK2B
Pubmed	15976328	Genetic deletion or antibody blockade of alpha1beta1 integrin induces a stable plaque phenotype in ApoE-/- mice.	Pubmed	0.0004838	1	0.02875	0.3324	2	3	APOE,ITGA1
Pubmed	26522727	Loss of ATF3 promotes hormone-induced prostate carcinogenesis and the emergence of CK5(+)CK8(+) epithelial cells.	Pubmed	0.0004838	1	0.02875	0.3324	2	3	KRT5,KRT8
Pubmed	21795541	?4?2 nicotinic acetylcholine receptors on dopaminergic neurons mediate nicotine reward and anxiety relief.	Pubmed	0.0004838	1	0.02875	0.3324	2	3	CHRNB2,SLC6A3
Pubmed	15046869	Molecular analysis of nicotinic receptor expression in autism.	Pubmed	0.0004838	1	0.02875	0.3324	2	3	CHRNA7,CHRNB2
Pubmed	20505554	Association study between the DAT1, DBH and DRD2 genes and cocaine dependence in a Spanish sample.	Pubmed	0.0004838	1	0.02875	0.3324	2	3	SLC6A3,DRD2
Pubmed	27175819	Lunasin suppresses the migration and invasion of breast cancer cells by inhibiting matrix metalloproteinase-2/-9 via the FAK/Akt/ERK and NF-?B signaling pathways.	Pubmed	0.0004838	1	0.02875	0.3324	2	3	MMP9,PTK2
Pubmed	23363412	Dopaminergic gene polymorphisms affect long-term forgetting in old age: further support for the magnification hypothesis.	Pubmed	0.0004838	1	0.02875	0.3324	2	3	SLC6A3,DRD2
Pubmed	25916117	[Under hypoxia condition contactin-1 regulates migration of MKN45 cells through RhoA pathway].	Pubmed	0.0004838	1	0.02875	0.3324	2	3	CNTN1,ARHGEF1
Pubmed	25326467	Dopaminergic Polymorphisms, Academic Achievement, and Violent Delinquency.	Pubmed	0.0004838	1	0.02875	0.3324	2	3	SLC6A3,DRD2
Pubmed	15353487	Combined adipocyte-macrophage fatty acid-binding protein deficiency improves metabolism, atherosclerosis, and survival in apolipoprotein E-deficient mice.	Pubmed	0.0004838	1	0.02875	0.3324	2	3	FABP5,APOE
Pubmed	26607794	Single-Cell Genomics Unveils Critical Regulators of Th17 Cell Pathogenicity.	Pubmed	0.0004838	1	0.02875	0.3324	2	3	ZBTB32,CD4
Pubmed	24924924	Genetic variants in PVRL2-TOMM40-APOE region are associated with human longevity in a Han Chinese population.	Pubmed	0.0004838	1	0.02875	0.3324	2	3	TOMM40,APOE
Pubmed	9795100	Structural analysis of mouse tenascin-X: evolutionary aspects of reduplication of FNIII repeats in the tenascin gene family.	Pubmed	0.0004838	1	0.02875	0.3324	2	3	CYP21A2,TNXB
Pubmed	11980671	Focal adhesion kinase enhances signaling through the Shc/extracellular signal-regulated kinase pathway in anaplastic astrocytoma tumor biopsy samples.	Pubmed	0.0004838	1	0.02875	0.3324	2	3	SHC1,PTK2
Pubmed	20451634	Modeling psychotic and cognitive symptoms of affective disorders: Disrupted latent inhibition and reversal learning deficits in highly stress reactive mice.	Pubmed	0.0004838	1	0.02875	0.3324	2	3	SLC6A3,DRD2
Pubmed	18768874	A novel role for non-neutralizing antibodies against nucleoprotein in facilitating resistance to influenza virus.	Pubmed	0.0004838	1	0.02875	0.3324	2	3	AICDA,CX3CR1
Pubmed	8872471	Spinocerebellar ataxia type-1 and spinobulbar muscular atrophy gene products interact with glyceraldehyde-3-phosphate dehydrogenase.	Pubmed	0.0004838	1	0.02875	0.3324	2	3	ATXN1,GAPDH
Pubmed	8530037	Mapping of the 75-kDa inositol polyphosphate-5-phosphatase (Inpp5b) to distal mouse chromosome 4 and its exclusion as a candidate gene for dysgenetic lens.	Pubmed	0.0004838	1	0.02875	0.3324	2	3	INPP5B,GRIK3
Pubmed	28657841	Association between dementia and vascular disease-associated polymorphisms in a Tunisian population.	Pubmed	0.0004838	1	0.02875	0.3324	2	3	PON1,APOE
Pubmed	210174	Apoprotein (E--A-II) complex of human plasma lipoproteins. I. Characterization of this mixed disulfide and its identification in a high density lipoprotein subfraction.	Pubmed	0.0004838	1	0.02875	0.3324	2	3	APOA1,APOE
Pubmed	26491253	Decreased expression of the APOA1-APOC3-APOA4 gene cluster is associated with risk of Alzheimer's disease.	Pubmed	0.0004838	1	0.02875	0.3324	2	3	APOA1,APOA4
Pubmed	11376485	LI-cadherin gene expression during mouse intestinal development.	Pubmed	0.0004838	1	0.02875	0.3324	2	3	CTNNB1,CDH17
Pubmed	25465389	Alginic acid cell entrapment: a novel method for measuring in vivo macrophage cholesterol homeostasis.	Pubmed	0.0004838	1	0.02875	0.3324	2	3	APOA1,APOE
Pubmed	21029969	Carcinoembryonic antigen-related cell adhesion molecule-1 regulates granulopoiesis by inhibition of granulocyte colony-stimulating factor receptor.	Pubmed	0.0004838	1	0.02875	0.3324	2	3	CSF3R,PTPN6
Pubmed	10403822	Casein kinase 2 binds to and phosphorylates BRCA1.	Pubmed	0.0004838	1	0.02875	0.3324	2	3	CSNK2A1,CSNK2B
Pubmed	12495081	Genetic variation of apolipoproteins in North Indians.	Pubmed	0.0004838	1	0.02875	0.3324	2	3	APOA4,APOE
Pubmed	17825930	A novel haplotype in ApoAI-CIII-AIV gene region is detrimental to Northwest Indians with coronary heart disease.	Pubmed	0.0004838	1	0.02875	0.3324	2	3	APOA1,APOA4
Pubmed	1763044	CD4-binding regions of human immunodeficiency virus envelope glycoprotein gp120 defined by proteolytic digestion.	Pubmed	0.0004838	1	0.02875	0.3324	2	3	PRSS1,CD4
Pubmed	17397984	Epidermal growth factor stimulates matrix metalloproteinase-9 expression and invasion in human follicular thyroid carcinoma cells through Focal adhesion kinase.	Pubmed	0.0004838	1	0.02875	0.3324	2	3	MMP9,PTK2
Pubmed	19728374	Epigenetic dysregulation of dopaminergic genes in eating disorders.	Pubmed	0.0004838	1	0.02875	0.3324	2	3	SLC6A3,DRD2
Pubmed	25271118	Symptoms of attention-deficit hyperactivity disorder, nonsyndromic orofacial cleft children, and dopamine polymorphisms: a pilot study.	Pubmed	0.0004838	1	0.02875	0.3324	2	3	SLC6A3,DRD2
Pubmed	9881639	Biochemical characterization of recombinant HIV-1 reverse transcriptase (rRT) as a glycyrrhizin-binding protein and the CK-II-mediated stimulation of rRT activity potently inhibited by glycyrrhetinic acid derivative.	Pubmed	0.0004838	1	0.02875	0.3324	2	3	CSNK2A1,CSNK2B
Pubmed	11950595	Nck-2 interacts with focal adhesion kinase and modulates cell motility.	Pubmed	0.0004838	1	0.02875	0.3324	2	3	NCK2,PTK2
Pubmed	12556235	The study of APOA1, APOC3 and APOA4 variability in healthy ageing people reveals another paradox in the oldest old subjects.	Pubmed	0.0004838	1	0.02875	0.3324	2	3	APOA1,APOA4
Pubmed	17363709	Myocardin-related transcription factors: critical coactivators regulating cardiovascular development and adaptation.	Pubmed	0.0004838	1	0.02875	0.3324	2	3	MRTFA,MYOCD
Pubmed	19635584	Apolipoproteins A-I, A-II and E are independently distributed among intracellular and newly secreted HDL of human hepatoma cells.	Pubmed	0.0004838	1	0.02875	0.3324	2	3	APOA1,APOE
Pubmed	26507659	Molecular Basis of Regulating High Voltage-Activated Calcium Channels by S-Nitrosylation.	Pubmed	0.0004838	1	0.02875	0.3324	2	3	CACNA1A,CACNA1B
Pubmed	23613467	The Wnt-?-catenin pathway represses let-7 microRNA expression through transactivation of Lin28 to augment breast cancer stem cell expansion.	Pubmed	0.0004838	1	0.02875	0.3324	2	3	CTNNB1,LIN28A
Pubmed	25684044	Association study of the SLC6A3 VNTR (DAT) and DRD2/ANKK1 Taq1A polymorphisms with alcohol dependence in a population from northeastern Brazil.	Pubmed	0.0004838	1	0.02875	0.3324	2	3	SLC6A3,DRD2
Pubmed	3874401	Liver mRNA probes disclose two cytochrome P-450 genes duplicated in tandem with the complement C4 loci of the mouse H-2S region.	Pubmed	0.0004838	1	0.02875	0.3324	2	3	CYP21A2,C4A
Pubmed	20558821	Deficiency of the NR4A orphan nuclear receptor NOR1 decreases monocyte adhesion and atherosclerosis.	Pubmed	0.0004838	1	0.02875	0.3324	2	3	APOE,NR4A3
Pubmed	22895193	Recurrent R-spondin fusions in colon cancer.	Pubmed	0.0004838	1	0.02875	0.3324	2	3	RSPO2,RSPO1
Pubmed	25476899	JWA reverses cisplatin resistance via the CK2-XRCC1 pathway in human gastric cancer cells.	Pubmed	0.0004838	1	0.02875	0.3324	2	3	XRCC1,CSNK2A1
Pubmed	15882073	Phosphorylation of apolipoprotein-E at an atypical protein kinase CK2 PSD/E site in vitro.	Pubmed	0.0004838	1	0.02875	0.3324	2	3	APOE,CSNK2A1
Pubmed	24095279	The folliculin tumor suppressor is a GAP for the RagC/D GTPases that signal amino acid levels to mTORC1.	Pubmed	0.0004838	1	0.02875	0.3324	2	3	FLCN,RRAGC
Pubmed	21527747	Hemodynamic activation of beta-catenin and T-cell-specific transcription factor signaling in vascular endothelium regulates fibronectin expression.	Pubmed	0.0004838	1	0.02875	0.3324	2	3	APOE,CTNNB1
Pubmed	11549583	Altered trafficking of membrane proteins in purkinje cells of SCA1 transgenic mice.	Pubmed	0.0004838	1	0.02875	0.3324	2	3	ATXN1,PRKCG
Pubmed	18772128	Lysophospholipid acyltransferases and arachidonate recycling in human neutrophils.	Pubmed	0.0004838	1	0.02875	0.3324	2	3	MBOAT7,MBOAT1
Pubmed	19158234	Role of angiotensin II-induced rapid response genes in the regulation of enzymes needed for aldosterone synthesis.	Pubmed	0.0004838	1	0.02875	0.3324	2	3	CYP11B2,CYP21A2
Pubmed	10381337	Heterogeneous nuclear ribonucleoprotein A2 interacts with protein kinase CK2.	Pubmed	0.0004838	1	0.02875	0.3324	2	3	CSNK2A1,CSNK2B
Pubmed	18671743	Decrease of D2 receptor binding but increase in D2-stimulated G-protein activation, dopamine transporter binding and behavioural sensitization in brains of mice treated with a chronic escalating dose 'binge' cocaine administration paradigm.	Pubmed	0.0004838	1	0.02875	0.3324	2	3	SLC6A3,DRD2
Pubmed	17525272	Focal adhesion kinase controls pH-dependent epidermal barrier homeostasis by regulating actin-directed Na+/H+ exchanger 1 plasma membrane localization.	Pubmed	0.0004838	1	0.02875	0.3324	2	3	SLC9A1,PTK2
Pubmed	29030431	Distinctive Modulation of Dopamine Release in the Nucleus Accumbens Shell Mediated by Dopamine and Acetylcholine Receptors.	Pubmed	0.0004838	1	0.02875	0.3324	2	3	SLC6A3,DRD2
Pubmed	26680205	The Inhibitory Receptor NKG2A Sustains Virus-Specific CD8? T Cells in Response to a Lethal Poxvirus Infection.	Pubmed	0.0004838	1	0.02875	0.3324	2	3	TYROBP,HCST
Pubmed	27834689	Nicotine Accelerates Atherosclerosis in Apolipoprotein E-Deficient Mice by Activating ?7 Nicotinic Acetylcholine Receptor on Mast Cells.	Pubmed	0.0004838	1	0.02875	0.3324	2	3	CHRNA7,APOE
Pubmed	15868628	Response to a urate-lowering diet according to polymorphisms in the apolipoprotein AI-CIII-AIV cluster.	Pubmed	0.0004838	1	0.02875	0.3324	2	3	APOA1,APOA4
Pubmed	26996551	Apolipoproteins as Differentiating and Predictive Markers for Assessing Clinical Outcomes in Patients with Small Cell Lung Cancer.	Pubmed	0.0004838	1	0.02875	0.3324	2	3	APOA1,APOE
Pubmed	22359659	Changes in temperature have opposing effects on current amplitude in ?7 and ?4?2 nicotinic acetylcholine receptors.	Pubmed	0.0004838	1	0.02875	0.3324	2	3	CHRNA7,CHRNB2
Pubmed	15576844	Severe hypertriglyceridemia in human APOC1 transgenic mice is caused by apoC-I-induced inhibition of LPL.	Pubmed	0.0004838	1	0.02875	0.3324	2	3	APOC1,APOE
Pubmed	11861906	Phosphorylation of mammalian translation initiation factor 5 (eIF5) in vitro and in vivo.	Pubmed	0.0004838	1	0.02875	0.3324	2	3	CSNK2A1,CSNK2B
Pubmed	12962772	Effect of apolipoprotein polymorphisms in renal transplant recipients.	Pubmed	0.0004838	1	0.02875	0.3324	2	3	APOA1,APOA4
Pubmed	25850813	ASXL1 mutations are frequent and prognostically detrimental in CSF3R-mutated chronic neutrophilic leukemia.	Pubmed	0.0004838	1	0.02875	0.3324	2	3	ASXL1,CSF3R
Pubmed	16354700	Direct interaction with Rab11a targets the epithelial Ca2+ channels TRPV5 and TRPV6 to the plasma membrane.	Pubmed	0.0004838	1	0.02875	0.3324	2	3	TRPV6,TRPV5
Pubmed	27036891	Dopamine dynamics and cocaine sensitivity differ between striosome and matrix compartments of the striatum.	Pubmed	0.0004838	1	0.02875	0.3324	2	3	SLC6A3,DRD2
Pubmed	21461859	Role of DDR1 in the gelatinases secretion induced by native type IV collagen in MDA-MB-231 breast cancer cells.	Pubmed	0.0004838	1	0.02875	0.3324	2	3	MMP9,DDR1
Pubmed	26246473	Tankyrase inhibitors attenuate WNT/?-catenin signaling and inhibit growth of hepatocellular carcinoma cells.	Pubmed	0.0004838	1	0.02875	0.3324	2	3	CTNNB1,TNKS2
Pubmed	12624609	Renin-angiotensin-aldosterone system and G-protein beta-3 subunit gene polymorphisms in salt-sensitive essential hypertension.	Pubmed	0.0004838	1	0.02875	0.3324	2	3	CYP11B2,GNB3
Pubmed	11641781	MST4, a new Ste20-related kinase that mediates cell growth and transformation via modulating ERK pathway.	Pubmed	0.0004838	1	0.02875	0.3324	2	3	EPHB2,MBP
Pubmed	1203051	Genetic variation of an intestinal leucine arylaminopeptidase (Lap-1) in the mouse and its location on chromosome 9.	Pubmed	0.0004838	1	0.02875	0.3324	2	3	ME1,ANPEP
Pubmed	19513381	Genetic markers of predisposition to increased anxiety.	Pubmed	0.0004838	1	0.02875	0.3324	2	3	SLC6A3,DRD2
Pubmed	13129924	Fatty acid-binding protein-hormone-sensitive lipase interaction. Fatty acid dependence on binding.	Pubmed	0.0004838	1	0.02875	0.3324	2	3	FABP5,LIPE
Pubmed	24576085	Inhibition of histone binding by supramolecular hosts.	Pubmed	0.0004838	1	0.02875	0.3324	2	3	CBX3,CHD4
Pubmed	22733030	Dopamine-system genes, childhood abuse, and clinical manifestations in women with Bulimia-Spectrum Disorders.	Pubmed	0.0004838	1	0.02875	0.3324	2	3	SLC6A3,DRD2
Pubmed	12748171	An aminopeptidase, ARTS-1, is required for interleukin-6 receptor shedding.	Pubmed	0.0004838	1	0.02875	0.3324	2	3	IL6R,TNFRSF1A
Pubmed	9188720	Physical dissection of the structural elements responsible for regulatory properties and intersubunit interactions of protein kinase CK2 beta-subunit.	Pubmed	0.0004838	1	0.02875	0.3324	2	3	CSNK2A1,CSNK2B
Pubmed	26224629	CYLD and the NEMO Zinc Finger Regulate Tumor Necrosis Factor Signaling and Early Embryogenesis.	Pubmed	0.0004838	1	0.02875	0.3324	2	3	CYLD,TNFRSF1A
Pubmed	10363996	Characterization of a novel receptor that maps near the natural killer gene complex: demonstration of carbohydrate binding and expression in hematopoietic cells.	Pubmed	0.0004838	1	0.02875	0.3324	2	3	PTPN6,TPI1
Pubmed	25301844	Osteoprotegerin deficiency limits angiotensin II-induced aortic dilatation and rupture in the apolipoprotein E-knockout mouse.	Pubmed	0.0004838	1	0.02875	0.3324	2	3	APOE,TNFRSF11B
Pubmed	11092945	Crystallization and preliminary characterization of crystals of human protein kinase CK2.	Pubmed	0.0004838	1	0.02875	0.3324	2	3	CSNK2A1,CSNK2B
Pubmed	10512750	Protein kinase CKII interacts with and phosphorylates the SAG protein containing ring-H2 finger motif.	Pubmed	0.0004838	1	0.02875	0.3324	2	3	CSNK2A1,CSNK2B
Pubmed	24590766	The protein tyrosine phosphatase PTP1B is a negative regulator of CD40 and BAFF-R signaling and controls B cell autoimmunity.	Pubmed	0.0004838	1	0.02875	0.3324	2	3	PTPN6,CD79A
Pubmed	8934525	A death-domain-containing receptor that mediates apoptosis.	Pubmed	0.0004838	1	0.02875	0.3324	2	3	TNFRSF25,TNFRSF1A
Pubmed	19574260	Mutations in 3 genes (MKS3, CC2D2A and RPGRIP1L) cause COACH syndrome (Joubert syndrome with congenital hepatic fibrosis).	Pubmed	0.0004838	1	0.02875	0.3324	2	3	TMEM67,CC2D2A
Pubmed	26397194	Isothiocyanates inhibit the invasion and migration of C6 glioma cells by blocking FAK/JNK-mediated MMP-9 expression.	Pubmed	0.0004838	1	0.02875	0.3324	2	3	MMP9,PTK2
Pubmed	12074828	Relation between butyrylcholinesterase K variant, paraoxonase 1 (PON1) Q and R and apolipoprotein E epsilon 4 genes in early-onset coronary artery disease.	Pubmed	0.0004838	1	0.02875	0.3324	2	3	PON1,APOE
Pubmed	15749827	A novel UbcH10-binding protein facilitates the ubiquitinylation of cyclin B in vitro.	Pubmed	0.0004838	1	0.02875	0.3324	2	3	UBE2C,UBE3D
Pubmed	21406211	Dynamic alterations of gene expression of nicotinic acetylcholine receptor ?7, ?4 and ?2 subunits in an acute MPTP-lesioned mouse model.	Pubmed	0.0004838	1	0.02875	0.3324	2	3	CHRNA7,CHRNB2
Pubmed	27742615	Chemerin Elicits Potent Constrictor Actions via Chemokine-Like Receptor 1 (CMKLR1), not G-Protein-Coupled Receptor 1 (GPR1), in Human and Rat Vasculature.	Pubmed	0.0004838	1	0.02875	0.3324	2	3	CMKLR1,GPR1
Pubmed	11827167	Protein kinase CK2: signaling and tumorigenesis in the mammary gland.	Pubmed	0.0004838	1	0.02875	0.3324	2	3	CSNK2A1,CSNK2B
Pubmed	19150878	FXR promotes endothelial cell motility through coordinated regulation of FAK and MMP-9.	Pubmed	0.0004838	1	0.02875	0.3324	2	3	MMP9,PTK2
Pubmed	28454051	No association between SLC6A2, SLC6A3, DRD2 polymorphisms and schizophrenia in the Han Chinese population.	Pubmed	0.0004838	1	0.02875	0.3324	2	3	SLC6A3,DRD2
Pubmed	22056562	Apolipoprotein A-I stimulates cholesteryl ester transfer protein and apolipoprotein E secretion from lipid-loaded macrophages; the role of NF-?B and PKA signaling pathways.	Pubmed	0.0004838	1	0.02875	0.3324	2	3	APOA1,APOE
Pubmed	17101791	Regulation of HDAC9 gene expression by MEF2 establishes a negative-feedback loop in the transcriptional circuitry of muscle differentiation.	Pubmed	0.0004838	1	0.02875	0.3324	2	3	MEF2D,HDAC9
Pubmed	21113497	Effects of genetic variations in the dopaminergic system on fatigue in humans: gender aspects.	Pubmed	0.0004838	1	0.02875	0.3324	2	3	SLC6A3,DRD2
Pubmed	19494537	Apolipoprotein E, CI and B gene polymorphisms in a sample of patients with coronary heart disease in the Kuwaiti population.	Pubmed	0.0004838	1	0.02875	0.3324	2	3	APOC1,APOE
Pubmed	24157255	Emodin represses TWIST1-induced epithelial-mesenchymal transitions in head and neck squamous cell carcinoma cells by inhibiting the ?-catenin and Akt pathways.	Pubmed	0.0004838	1	0.02875	0.3324	2	3	TWIST1,CTNNB1
Pubmed	22885067	NLF2 gene expression in the endometrium of patients with implantation failure after IVF treatment.	Pubmed	0.0004838	1	0.02875	0.3324	2	3	MFAP2,MFAP5
Pubmed	17336988	Fractionation of cholesteryl ester rich intermediate density lipoprotein subpopulations by chondroitin sulphate.	Pubmed	0.0004838	1	0.02875	0.3324	2	3	APOC2,APOE
Pubmed	23677868	Siglec-15 regulates osteoclast differentiation by modulating RANKL-induced phosphatidylinositol 3-kinase/Akt and Erk pathways in association with signaling Adaptor DAP12.	Pubmed	0.0004838	1	0.02875	0.3324	2	3	TYROBP,SIGLEC15
Pubmed	25788269	Protein kinase CK2 is widely expressed in follicular, Burkitt and diffuse large B-cell lymphomas and propels malignant B-cell growth.	Pubmed	0.0004838	1	0.02875	0.3324	2	3	CSNK2A1,CSNK2B
Pubmed	18050191	Type IV collagen alpha-chain composition in synovial lining from trauma patients and patients with rheumatoid arthritis.	Pubmed	0.0004838	1	0.02875	0.3324	2	3	MMP9,COL4A2
Pubmed	19503107	Macrophage colony-stimulating factor induces the proliferation and survival of macrophages via a pathway involving DAP12 and beta-catenin.	Pubmed	0.0004838	1	0.02875	0.3324	2	3	TYROBP,HCST
Pubmed	27721068	Molecular simulation study of the unbinding of ?-conotoxin [?4E]GID at the ?7 and ?4?2 neuronal nicotinic acetylcholine receptors.	Pubmed	0.0004838	1	0.02875	0.3324	2	3	CHRNA7,CHRNB2
Pubmed	11903341	Apolipoproteins AI, B, and E polymorphisms in severe aortic valve stenosis.	Pubmed	0.0004838	1	0.02875	0.3324	2	3	APOA1,APOE
Pubmed	21320567	Regulation of MMP-9 expression by the A2b adenosine receptor and its dependency on TNF-? signaling.	Pubmed	0.0004838	1	0.02875	0.3324	2	3	MMP9,TNFRSF1A
Pubmed	27786532	Relations between three dopaminergic system genes, school attachment, and adolescent delinquency.	Pubmed	0.0004838	1	0.02875	0.3324	2	3	SLC6A3,DRD2
Pubmed	16225457	The N-terminal domain of the human eIF2beta subunit and the CK2 phosphorylation sites are required for its function.	Pubmed	0.0004838	1	0.02875	0.3324	2	3	CSNK2A1,CSNK2B
Pubmed	15225637	Phosphorylation of the regulatory beta-subunit of protein kinase CK2 by checkpoint kinase Chk1: identification of the in vitro CK2beta phosphorylation site.	Pubmed	0.0004838	1	0.02875	0.3324	2	3	CSNK2A1,CSNK2B
Pubmed	23892456	A direct physical interaction between Nanog and Sox2 regulates embryonic stem cell self-renewal.	Pubmed	0.0005268	1	0.03081	0.3563	8	143	CBX3,CHD4,ARID1A,CSNK2A1,ZFR,SALL3,KMT2B,RBM4B
Pubmed	18082144	Arabidopsis HY5 protein functions as a DNA-binding tag for purification and functional immobilization of proteins on agarose/DNA microplate.	Pubmed	0.0005376	1	0.03081	0.3563	3	13	TTK,CSNK2A1,PAK3
Pubmed	19155782	The environmental and genetic evidence for the association of hyperlipidemia and hypertension.	Pubmed	0.0005376	1	0.03081	0.3563	3	13	APOA1,APOE,GNB3
Pubmed	29490983	The histone acetyltransferase inhibitor Nir regulates epidermis development.	Pubmed	0.0005376	1	0.03081	0.3563	3	13	CTNNB1,KRT5,KRT8
Pubmed	17192785	Systematic meta-analyses of Alzheimer disease genetic association studies: the AlzGene database.	Pubmed	0.0005376	1	0.03081	0.3563	3	13	CHRNB2,APOE,GAPDHS
Pubmed	23567158	Deletion of beta catenin in hypertrophic growth plate chondrocytes impairs trabecular bone formation.	Pubmed	0.0005376	1	0.03081	0.3563	3	13	MMP9,CTNNB1,TNFRSF11B
Pubmed	17360773	The chromatin remodeler Mi-2beta is required for establishment of the basal epidermis and normal differentiation of its progeny.	Pubmed	0.0005376	1	0.03081	0.3563	3	13	CHD4,CTNNB1,KRT5
Pubmed	22266179	Novel cell surface genes expressed in the stomach primordium during gastrointestinal morphogenesis of mouse embryos.	Pubmed	0.0005376	1	0.03081	0.3563	3	13	FZD7,TRPV6,TRPV5
Pubmed	17222401	Activity-dependent neuroprotective protein (ADNP) differentially interacts with chromatin to regulate genes essential for embryogenesis.	Pubmed	0.0005376	1	0.03081	0.3563	3	13	APOA1,APOA4,APOE
Pubmed	12399393	Hague (Hag). A new mouse hair mutation with an unstable semidominant allele.	Pubmed	0.0005376	1	0.03081	0.3563	3	13	KRT5,KRT8,KRT84
Pubmed	10641798	HIV-1 reverse transcriptase is phosphorylated in vitro and in a cellular system.	Pubmed	0.0005376	1	0.03081	0.3563	3	13	CSNK2A1,CSNK2B,PRKCG
Pubmed	25124681	The miR-379/miR-410 cluster at the imprinted Dlk1-Dio3 domain controls neonatal metabolic adaptation.	Pubmed	0.0005525	1	0.03081	0.3563	4	30	TWIST1,NR0B2,CROT,CYP4A11
Pubmed	1981054	A molecular genetic linkage map of mouse chromosome 7.	Pubmed	0.0005525	1	0.03081	0.3563	4	30	POU2F2,XRCC1,APOE,PRKCG
Pubmed	27107014	An inter-species protein-protein interaction network across vast evolutionary distance.	Pubmed	0.000557	1	0.03081	0.3563	16	483	TUFT1,CLK2,FHL3,NCK2,RABAC1,UBXN11,ZBTB32,CEP72,ZBTB25,ZBED8,FLAD1,HACL1,NAV2,ZBTB7B,MAL2,RNF41
Pubmed	19420105	A candidate gene approach to genetic prognostic factors of IgA nephropathy--a result of Polymorphism REsearch to DIstinguish genetic factors Contributing To progression of IgA Nephropathy (PREDICT-IgAN).	Pubmed	0.000568	1	0.03081	0.3563	6	80	MMP9,PON1,APOE,CX3CR1,DRD2,TNFRSF11B
Pubmed	21630459	Proteomic characterization of the human sperm nucleus.	Pubmed	0.000572	1	0.03081	0.3563	15	437	RPS9,RCC1,HSPA2,RDH14,APCS,APOE,CSNK2A1,CSNK2B,GAPDH,GAPDHS,GNL1,KRT5,KRT8,RPL18,TPI1
Pubmed	10926756	Homeodomain factor Nkx2-3 controls regional expression of leukocyte homing coreceptor MAdCAM-1 in specialized endothelial cells of the viscera.	Pubmed	0.0005755	1	0.03081	0.3563	5	53	APOA1,APOA4,SLC40A1,CD4,TNFRSF1A
Pubmed	15047060	Analysis of proteins copurifying with the CD4/lck complex using one-dimensional polyacrylamide gel electrophoresis and mass spectrometry: comparison with affinity-tag based protein detection and evaluation of different solubilization methods.	Pubmed	0.0005755	1	0.03081	0.3563	5	53	RPS9,RPS19,GAPDH,CD4,RPL18
Pubmed	20331378	Large-scale candidate gene analysis of spontaneous clearance of hepatitis C virus.	Pubmed	0.0006056	1	0.03081	0.3563	7	112	IFITM1,APOA1,APOC1,APOC2,APOE,CD86,TNFRSF1A
Pubmed	25281560	Proximity biotinylation and affinity purification are complementary approaches for the interactome mapping of chromatin-associated protein complexes.	Pubmed	0.0006233	1	0.03081	0.3563	19	636	PIP5K1A,XRCC1,TBC1D31,CEP72,ZNF516,KDM2A,CYLD,MED18,ENY2,TAX1BP1,NOP2,THRAP3,KIF2C,SPAG9,FGFR1OP,MYH14,GNB4,EPB41,TPI1
Pubmed	20031551	Pharmacogenetic predictors of statin-mediated low-density lipoprotein cholesterol reduction and dose response.	Pubmed	0.000628	1	0.03081	0.3563	4	31	APOA1,APOA4,APOC2,APOE
Pubmed	21779394	Expression of Foxm1 transcription factor in cardiomyocytes is required for myocardial development.	Pubmed	0.000628	1	0.03081	0.3563	4	31	TWIST1,MYOCD,CTNNB1,SOX4
Pubmed	11389549	Expression of genes involved in mammalian meiosis during the transition from egg to embryo.	Pubmed	0.000628	1	0.03081	0.3563	4	31	TTK,PTPN6,DBF4,RPA2
Pubmed	15582152	A neurogenomics approach to gene expression analysis in the developing brain.	Pubmed	0.0006321	1	0.03081	0.3563	8	147	FABP5,LENG8,MFAP2,APOE,GALNT1,THRAP3,CD86,ARHGEF1
Pubmed	19254215	[Association of genetic factors with clinical peculiarities of hypertensive disease in patients with burdened familial anamnesis].	Pubmed	0.0006777	1	0.03081	0.3563	3	14	PON1,CYP11B2,GNB3
Pubmed	19015224	Polymorphisms in C2, CFB and C3 are associated with progression to advanced age related macular degeneration associated with visual loss.	Pubmed	0.0006777	1	0.03081	0.3563	3	14	PON1,APOE,CX3CR1
Pubmed	23762317	Identifying chemicals with potential therapy of HIV based on protein-protein and protein-chemical interaction network.	Pubmed	0.0006777	1	0.03081	0.3563	3	14	CTNNB1,PTK2,CD4
Pubmed	1617222	Organization and chromosomal locations of Rap1a/Krev sequences in the mouse.	Pubmed	0.0006777	1	0.03081	0.3563	3	14	PKLR,AMPD1,GBA
Pubmed	7916002	Recombination in the class III region of the mouse major histocompatibility complex.	Pubmed	0.0006777	1	0.03081	0.3563	3	14	CYP21A2,C4A,TNXB
Pubmed	21228161	Calcium channels link the muscle-derived synapse organizer laminin ?2 to Bassoon and CAST/Erc2 to organize presynaptic active zones.	Pubmed	0.0006777	1	0.03081	0.3563	3	14	SV2B,CACNA1A,CACNA1B
Pubmed	15610731	The SRF target gene Fhl2 antagonizes RhoA/MAL-dependent activation of SRF.	Pubmed	0.0006777	1	0.03081	0.3563	3	14	TUFT1,FHL3,MRTFA
Pubmed	16465594	Expression profiling identifies novel candidate genes for ethanol sensitivity QTLs.	Pubmed	0.0006777	1	0.03081	0.3563	3	14	CTHRC1,SCRT1,KRT8
Pubmed	16287714	A Brg1 mutation that uncouples ATPase activity from chromatin remodeling reveals an essential role for SWI/SNF-related complexes in beta-globin expression and erythroid development.	Pubmed	0.0006777	1	0.03081	0.3563	3	14	ARID1A,GAPDH,CD4
Pubmed	24557836	Activity of protein kinase RIPK3 determines whether cells die by necroptosis or apoptosis.	Pubmed	0.0006777	1	0.03081	0.3563	3	14	CYLD,TNFRSF25,TNFRSF1A
Pubmed	19060906	Common variants at 30 loci contribute to polygenic dyslipidemia.	Pubmed	0.0006832	1	0.03081	0.3563	5	55	APOA1,APOA4,APOC1,APOC2,APOE
Pubmed	11180952	A large-scale in situ screen provides molecular evidence for the induction of eye anterior segment structures by the developing lens.	Pubmed	0.0006832	1	0.03081	0.3563	5	55	TWIST1,COL4A2,SOX4,GAPDH,GRB10
Pubmed	19380743	Charting the molecular network of the drug target Bcr-Abl.	Pubmed	0.0006855	1	0.03081	0.3563	11	266	RPS19,SHC1,NECAP1,GAPDH,DDX6,ANKRD28,SKAP2,KRT5,KRT8,KRT84,MYH14
Pubmed	20673868	A genetic association study of maternal and fetal candidate genes that predispose to preterm prelabor rupture of membranes (PROM).	Pubmed	0.0006902	1	0.03081	0.3563	9	186	MMP9,COL4A2,PON1,APOA1,APOE,IL6R,GNB3,NPY,TNFRSF1A
Pubmed	19423573	A protein interaction network for the large conductance Ca(2+)-activated K(+) channel in the mouse cochlea.	Pubmed	0.0006908	1	0.03081	0.3563	8	149	MBP,HSPA2,APOA1,APOE,GAPDH,CA2,INA,TPI1
Pubmed	16183747	Diversification of stem cell molecular repertoire by alternative splicing.	Pubmed	0.0007105	1	0.03081	0.3563	4	32	TTK,CLK2,GRWD1,CD27
Pubmed	27414999	Polycomb-Mediated Repression and Sonic Hedgehog Signaling Interact to Regulate Merkel Cell Specification during Skin Development.	Pubmed	0.0007105	1	0.03081	0.3563	4	32	ITGA8,CTNNB1,KRT5,KRT8
Pubmed	20452482	Identification of fetal and maternal single nucleotide polymorphisms in candidate genes that predispose to spontaneous preterm labor with intact membranes.	Pubmed	0.0007171	1	0.03081	0.3563	9	187	MMP9,COL4A2,PON1,APOA1,APOE,IL6R,GNB3,NPY,TNFRSF1A
Pubmed	19274049	A census of human transcription factors: function, expression and evolution.	Pubmed	0.0007327	1	0.03081	0.3563	24	908	ZNF384,JDP2,MEF2D,RXRB,TWIST1,USF2,POU2F2,POU3F1,POU3F2,ZHX2,CREB5,ARNT,MTF1,ZNF335,GMEB1,SOX4,ZNF236,CIC,BNC1,NR4A3,ZBTB7B,HIVEP3,HEY1,TSHZ1
Pubmed	26365490	Systematic identification of factors for provirus silencing in embryonic stem cells.	Pubmed	0.0007537	1	0.03081	0.3563	8	151	CBX3,CHD4,ARID1A,EIF3H,CTPS1,EIF3E,SETDB1,ANKRD28
Pubmed	19948975	Integrative predictive model of coronary artery calcification in atherosclerosis.	Pubmed	0.0007852	1	0.03081	0.3563	10	229	AMPD1,PON1,APCS,APOA1,APOA4,APOC2,APOE,CYP11B2,GNB3,TNFRSF1A
Pubmed	11239407	The TNF and TNF receptor superfamilies: integrating mammalian biology.	Pubmed	0.0008004	1	0.03081	0.3563	4	33	TNFRSF25,TNFRSF11B,CD27,TNFRSF1A
Pubmed	24453333	Differential neuronal targeting of a new and two known calcium channel ?4 subunit splice variants correlates with their regulation of gene expression.	Pubmed	0.0008392	1	0.03081	0.3563	3	15	CACNA2D4,CACNA1A,CACNA1B
Pubmed	17449559	Gene-environment interactions in parkinsonism and Parkinson's disease: the Geoparkinson study.	Pubmed	0.0008392	1	0.03081	0.3563	3	15	PON1,SLC6A3,DRD2
Pubmed	19661379	Poly(ADP-ribose)-dependent regulation of DNA repair by the chromatin remodeling enzyme ALC1.	Pubmed	0.0008392	1	0.03081	0.3563	3	15	CBX3,XRCC1,RPA2
Pubmed	17276340	BIM regulates apoptosis during mammary ductal morphogenesis, and its absence reveals alternative cell death mechanisms.	Pubmed	0.0008392	1	0.03081	0.3563	3	15	CTNNB1,KRT5,KRT8
Pubmed	20538124	Genetic polymorphisms and the cardiovascular risk of non-steroidal anti-inflammatory drugs.	Pubmed	0.0008392	1	0.03081	0.3563	3	15	MMP9,PON1,APOE
Pubmed	20376577	APOA-1 is a novel marker of erythroid cell maturation from hematopoietic stem cells in mice and humans.	Pubmed	0.0008392	1	0.03081	0.3563	3	15	APOA1,APOE,EBAG9
Pubmed	12628923	Protein kinase CK2 and protein kinase D are associated with the COP9 signalosome.	Pubmed	0.0008392	1	0.03081	0.3563	3	15	CSNK2A1,CSNK2B,COPS7A
Pubmed	15226265	Genetic loci that control the angiogenic response to basic fibroblast growth factor.	Pubmed	0.0008392	1	0.03081	0.3563	3	15	FZD6,TNFRSF11B,HAS2
Pubmed	20188150	Voltage-activated calcium channel expression profiles in mouse brain and cultured hippocampal neurons.	Pubmed	0.0008392	1	0.03081	0.3563	3	15	CACNA2D4,CACNA1A,CACNA1B
Pubmed	17002498	Adenomatous polyposis coli (APC) is required for normal development of skin and thymus.	Pubmed	0.0008392	1	0.03081	0.3563	3	15	CTNNB1,KRT5,KRT8
Pubmed	18541383	Protein array analysis of oligomerization-induced changes in alpha-synuclein protein-protein interactions points to an interference with Cdc42 effector proteins.	Pubmed	0.0008392	1	0.03081	0.3563	3	15	MEF2D,GABARAPL1,PAK3
Pubmed	8798769	Cloning of a third mammalian Na+-Ca2+ exchanger, NCX3.	Pubmed	0.0008392	1	0.03081	0.3563	3	15	RXRB,APOE,LIPE
Pubmed	25515538	A systems-wide screen identifies substrates of the SCF?TrCP ubiquitin ligase.	Pubmed	0.0008671	1	0.03081	0.3563	10	232	ADAR,SYBU,FLCN,ZFR,CTNNB1,WDTC1,SPIRE1,RNF115,THRAP3,LARS2
Pubmed	11140838	A multivariate analysis of 59 candidate genes in personality traits: the temperament and character inventory.	Pubmed	0.0008722	1	0.03081	0.3563	5	58	ANPEP,APOE,SLC6A3,DRD2,CD4
Pubmed	15952740	Protein profiling of human pancreatic islets by two-dimensional gel electrophoresis and mass spectrometry.	Pubmed	0.0008722	1	0.03081	0.3563	5	58	PRSS1,GAPDH,CA2,KRT8,TPI1
Pubmed	18346943	Transcriptional profiling of Wnt4 mutant mouse kidneys identifies genes expressed during nephron formation.	Pubmed	0.0008981	1	0.03081	0.3563	4	34	MAPK12,ANPEP,FXYD6,SNAP91
Pubmed	20877624	Genetic variants in nuclear-encoded mitochondrial genes influence AIDS progression.	Pubmed	0.0009571	1	0.03081	0.3563	24	926	TBRG4,ME1,SLC25A32,FDPS,TOMM40,RDH14,MRPL13,CROT,THEM4,PDP1,MRPS15,NDUFAF6,EMC2,CMC1,CYP11B2,NDUFV1,DAP3,TMEM65,PRSS35,KRT5,OXR1,LARS2,HIBADH,MECR
Pubmed	8268662	Corticotropin-releasing hormone (Crh) maps to mouse chromosome 3.	Pubmed	0.0009594	1	0.03081	0.3563	2	4	GBA,CA2
Pubmed	20406466	Genetic variants associated with fasting blood lipids in the U.S. population: Third National Health and Nutrition Examination Survey.	Pubmed	0.0009594	1	0.03081	0.3563	2	4	PON1,APOE
Pubmed	7689229	The 25-kDa FK506-binding protein is localized in the nucleus and associates with casein kinase II and nucleolin.	Pubmed	0.0009594	1	0.03081	0.3563	2	4	CSNK2A1,CSNK2B
Pubmed	10398585	Serine 32 and serine 36 of IkappaBalpha are directly phosphorylated by protein kinase CKII in vitro.	Pubmed	0.0009594	1	0.03081	0.3563	2	4	CSNK2A1,CSNK2B
Pubmed	20664522	Phosphorylation of CLIP-170 by Plk1 and CK2 promotes timely formation of kinetochore-microtubule attachments.	Pubmed	0.0009594	1	0.03081	0.3563	2	4	CSNK2A1,CSNK2B
Pubmed	28052249	Opposing Functions of Microglial and Macrophagic TNFR2 in the Pathogenesis of Experimental Autoimmune Encephalomyelitis.	Pubmed	0.0009594	1	0.03081	0.3563	2	4	CX3CR1,TNFRSF1A
Pubmed	14645218	Casein kinase II-mediated phosphorylation regulates alpha-synuclein/synphilin-1 interaction and inclusion body formation.	Pubmed	0.0009594	1	0.03081	0.3563	2	4	CSNK2A1,CSNK2B
Pubmed	15108119	The effects of scale: variation in the APOA1/C3/A4/A5 gene cluster.	Pubmed	0.0009594	1	0.03081	0.3563	2	4	APOA1,APOA4
Pubmed	25148110	Effects of COMT, DRD2, BDNF, and APOE Genotypic Variation on Treatment Efficacy and Cognitive Side Effects of Electroconvulsive Therapy.	Pubmed	0.0009594	1	0.03081	0.3563	2	4	APOE,DRD2
Pubmed	14684824	Transcription-coupled events associating with immunoglobulin switch region chromatin.	Pubmed	0.0009594	1	0.03081	0.3563	2	4	AICDA,CD79A
Pubmed	26986136	The Association Between Genetic Variants in the Dopaminergic System and Posttraumatic Stress Disorder: A Meta-Analysis.	Pubmed	0.0009594	1	0.03081	0.3563	2	4	SLC6A3,DRD2
Pubmed	21968188	p53 deacetylation by SIRT1 decreases during protein kinase CKII downregulation-mediated cellular senescence.	Pubmed	0.0009594	1	0.03081	0.3563	2	4	CSNK2A1,CSNK2B
Pubmed	27035870	Knockdown of LI-cadherin alters expression of matrix metalloproteinase-2 and -9 and galectin-3.	Pubmed	0.0009594	1	0.03081	0.3563	2	4	MMP9,CDH17
Pubmed	8375396	Activation and substrate specificity of the human protein kinase C alpha and zeta isoenzymes.	Pubmed	0.0009594	1	0.03081	0.3563	2	4	MBP,PRKCG
Pubmed	26632270	CX3CR1 deficiency promotes muscle repair and regeneration by enhancing macrophage ApoE production.	Pubmed	0.0009594	1	0.03081	0.3563	2	4	APOE,CX3CR1
Pubmed	11062072	Bovine prion protein as a modulator of protein kinase CK2.	Pubmed	0.0009594	1	0.03081	0.3563	2	4	CSNK2A1,CSNK2B
Pubmed	12454992	G protein subunit G gamma 13 is coexpressed with G alpha o, G beta 3, and G beta 4 in retinal ON bipolar cells.	Pubmed	0.0009594	1	0.03081	0.3563	2	4	GNB3,GNB4
Pubmed	25441120	Up-regulation of HP1? expression during neuronal maturation promotes axonal and dendritic development in mouse embryonic neocortex.	Pubmed	0.0009594	1	0.03081	0.3563	2	4	CBX3,POU3F2
Pubmed	25881561	Mir-17-92 regulates bone marrow homing of plasma cells and production of immunoglobulin G2c.	Pubmed	0.0009594	1	0.03081	0.3563	2	4	AICDA,PTPN6
Pubmed	6328445	Human apolipoproteins AI, AII, CII and CIII. cDNA sequences and mRNA abundance.	Pubmed	0.0009594	1	0.03081	0.3563	2	4	APOA1,APOC2
Pubmed	22975381	A "twist box" code of p53 inactivation: twist box: p53 interaction promotes p53 degradation.	Pubmed	0.0009594	1	0.03081	0.3563	2	4	TWIST1,CSNK2A1
Pubmed	21784059	Recruitment of the cohesin loading factor NIPBL to DNA double-strand breaks depends on MDC1, RNF168 and HP1? in human cells.	Pubmed	0.0009594	1	0.03081	0.3563	2	4	CBX3,MDC1
Pubmed	11906696	Novel modulation of neuronal nicotinic acetylcholine receptors by association with the endogenous prototoxin lynx1.	Pubmed	0.0009594	1	0.03081	0.3563	2	4	CHRNA7,CHRNB2
Pubmed	18061419	Src kinase regulates metalloproteinase-9 secretion induced by type IV collagen in MCF-7 human breast cancer cells.	Pubmed	0.0009594	1	0.03081	0.3563	2	4	MMP9,PTK2
Pubmed	19494806	Dopamine genes and nicotine dependence in treatment-seeking and community smokers.	Pubmed	0.0009594	1	0.03081	0.3563	2	4	SLC6A3,DRD2
Pubmed	7601480	Mapping of guanylin to murine chromosome 4 and human chromosome 1p34-p35.	Pubmed	0.0009594	1	0.03081	0.3563	2	4	CSF3R,CYP4A11
Pubmed	10224232	Paracrine glucocorticoid activity produced by mouse thymic epithelial cells.	Pubmed	0.0009594	1	0.03081	0.3563	2	4	CYP11B2,CYP21A2
Pubmed	16380821	Protective molecules--C-reactive protein (CRP), serum amyloid P (SAP), pentraxin3 (PTX3), mannose-binding lectin (MBL), and apolipoprotein A1 (Apo A1), and their autoantibodies: prevalence and clinical significance in autoimmunity.	Pubmed	0.0009594	1	0.03081	0.3563	2	4	APCS,APOA1
Pubmed	22005300	Activation of MDL-1 (CLEC5A) on immature myeloid cells triggers lethal shock in mice.	Pubmed	0.0009594	1	0.03081	0.3563	2	4	TYROBP,HCST
Pubmed	15207008	Structure-function evolution of the transforming acidic coiled coil genes revealed by analysis of phylogenetically diverse organisms.	Pubmed	0.0009594	1	0.03081	0.3563	2	4	RXRB,TACC3
Pubmed	18587729	Further evidence for the association of MMP9 with nephropathy in type 2 diabetes and application of DNA pooling technology to candidate gene screening.	Pubmed	0.0009594	1	0.03081	0.3563	2	4	MMP9,HAS2
Pubmed	23514615	The transmembrane domain of HIV-1 Vpu is sufficient to confer anti-tetherin activity to SIVcpz and SIVgor Vpu proteins: cytoplasmic determinants of Vpu function.	Pubmed	0.0009594	1	0.03081	0.3563	2	4	CTNNB1,CD4
Pubmed	28031292	Protein kinase CK2 modulates HSJ1 function through phosphorylation of the UIM2 domain.	Pubmed	0.0009594	1	0.03081	0.3563	2	4	CSNK2A1,CSNK2B
Pubmed	17964293	Genetic association study of APOA1/C3/A4/A5 gene cluster and haplotypes on triglyceride and HDL cholesterol in a community-based population.	Pubmed	0.0009594	1	0.03081	0.3563	2	4	APOA1,APOA4
Pubmed	18295959	Matrix metalloproteinases 2 and 9, E-cadherin, and beta-catenin expression in endometriosis, low-grade endometrial carcinoma and non-neoplastic eutopic endometrium.	Pubmed	0.0009594	1	0.03081	0.3563	2	4	MMP9,CTNNB1
Pubmed	19039329	Cleavage of La protein by granzyme H induces cytoplasmic translocation and interferes with La-mediated HCV-IRES translational activity.	Pubmed	0.0009594	1	0.03081	0.3563	2	4	CSNK2A1,CSNK2B
Pubmed	11328206	Genetic polymorphisms in older subjects with vascular or Alzheimer's dementia.	Pubmed	0.0009594	1	0.03081	0.3563	2	4	PON1,APOE
Pubmed	12944486	Apparently normal tumor necrosis factor receptor 1 signaling in the absence of the silencer of death domains.	Pubmed	0.0009594	1	0.03081	0.3563	2	4	TNFRSF25,TNFRSF1A
Pubmed	18776907	Cascading suppression of transcriptional silencers by ThPOK seals helper T cell fate.	Pubmed	0.0009594	1	0.03081	0.3563	2	4	ZBTB7B,CD4
Pubmed	9566877	Multiple Grb2-mediated integrin-stimulated signaling pathways to ERK2/mitogen-activated protein kinase: summation of both c-Src- and focal adhesion kinase-initiated tyrosine phosphorylation events.	Pubmed	0.0009594	1	0.03081	0.3563	2	4	SHC1,PTK2
Pubmed	11948912	Cooperative E-box regulation of human GLI1 by TWIST and USF.	Pubmed	0.0009594	1	0.03081	0.3563	2	4	TWIST1,USF2
Pubmed	7512972	The distribution of tenascin-X is distinct and often reciprocal to that of tenascin-C.	Pubmed	0.0009594	1	0.03081	0.3563	2	4	CYP21A2,TNXB
Pubmed	15728831	A protein phosphatase 2calpha-Ca2+ channel complex for dephosphorylation of neuronal Ca2+ channels phosphorylated by protein kinase C.	Pubmed	0.0009594	1	0.03081	0.3563	2	4	CACNA1A,CACNA1B
Pubmed	27102562	Evaluation of voltage-dependent calcium channel ? gene families identified several novel potential susceptible genes to schizophrenia.	Pubmed	0.0009594	1	0.03081	0.3563	2	4	CACNG8,CACNG6
Pubmed	16136540	Apolipoproteins (apoproteins) and LPL variation in Mennonite populations of Kansas and Nebraska.	Pubmed	0.0009594	1	0.03081	0.3563	2	4	APOA1,APOE
Pubmed	1543505	Diversity among the beta subunits of heterotrimeric GTP-binding proteins: characterization of a novel beta-subunit cDNA.	Pubmed	0.0009594	1	0.03081	0.3563	2	4	GNB3,GNB4
Pubmed	26044581	Associations of ApoAI and ApoB-containing lipoproteins with AngII-induced abdominal aortic aneurysms in mice.	Pubmed	0.0009594	1	0.03081	0.3563	2	4	APOA1,APOE
Pubmed	17044099	Evaluation of potential gene-gene interactions for attention deficit hyperactivity disorder in the Han Chinese population.	Pubmed	0.0009594	1	0.03081	0.3563	2	4	SLC6A3,DRD2
Pubmed	29884220	Cytokeratin 5/6 and cytokeratin 8/18 expression in triple negative breast cancers: clinicopathologic significance in South-Asian population.	Pubmed	0.0009594	1	0.03081	0.3563	2	4	KRT5,KRT8
Pubmed	23945674	Impact of docosahexaenoic acid on gene expression during osteoclastogenesis in vitro--a comprehensive analysis.	Pubmed	0.0009594	1	0.03081	0.3563	2	4	DCSTAMP,SIGLEC15
Pubmed	24193094	Aggression and polymorphisms in AR, DAT1, DRD2, and COMT genes in Datoga pastoralists of Tanzania.	Pubmed	0.0009594	1	0.03081	0.3563	2	4	SLC6A3,DRD2
Pubmed	26707073	CD151 knockdown inhibits osteosarcoma metastasis through the GSK-3?/?-catenin/MMP9 pathway.	Pubmed	0.0009594	1	0.03081	0.3563	2	4	MMP9,CTNNB1
Pubmed	20719947	Epstein-Barr virus nuclear antigen 1 Hijacks the host kinase CK2 to disrupt PML nuclear bodies.	Pubmed	0.0009594	1	0.03081	0.3563	2	4	CSNK2A1,CSNK2B
Pubmed	15649902	The expression of intact and mutant human apoAI/CIII/AIV/AV gene cluster in transgenic mice.	Pubmed	0.0009594	1	0.03081	0.3563	2	4	APOA1,APOA4
Pubmed	11376335	A GTP-binding adapter protein couples TRAIL receptors to apoptosis-inducing proteins.	Pubmed	0.0009594	1	0.03081	0.3563	2	4	TNFRSF25,DAP3
Pubmed	27924814	Mature IgM-expressing plasma cells sense antigen and develop competence for cytokine production upon antigenic challenge.	Pubmed	0.0009594	1	0.03081	0.3563	2	4	AICDA,CD79A
Pubmed	16781717	Associations of the apolipoprotein A1/C3/A4/A5 gene cluster with triglyceride and HDL cholesterol levels in women with type 2 diabetes.	Pubmed	0.0009594	1	0.03081	0.3563	2	4	APOA1,APOA4
Pubmed	22732586	B7-CD28 costimulatory signals control the survival and proliferation of murine and human ?? T cells via IL-2 production.	Pubmed	0.0009594	1	0.03081	0.3563	2	4	CD27,CD86
Pubmed	18337722	Opposing effects of polyglutamine expansion on native protein complexes contribute to SCA1.	Pubmed	0.0009594	1	0.03081	0.3563	2	4	ATXN1,CIC
Pubmed	22079990	The fractalkine receptor but not CCR2 is present on microglia from embryonic development throughout adulthood.	Pubmed	0.0009594	1	0.03081	0.3563	2	4	AIF1,CX3CR1
Pubmed	11713579	FAS-associated factor 1 interacts with protein kinase CK2 in vivo upon apoptosis induction.	Pubmed	0.0009594	1	0.03081	0.3563	2	4	CSNK2A1,CSNK2B
Pubmed	28398520	Injury Leads to the Appearance of Cells with Characteristics of Both Microglia and Astrocytes in Mouse and Human Brain.	Pubmed	0.0009594	1	0.03081	0.3563	2	4	AIF1,CX3CR1
Pubmed	23599180	Characterizing the convergence of protein kinase CK2 and caspase-3 reveals isoform-specific phosphorylation of caspase-3 by CK2?': implications for pathological roles of CK2 in promoting cancer cell survival.	Pubmed	0.0009594	1	0.03081	0.3563	2	4	CSNK2A1,CSNK2B
Pubmed	12048121	Analysis of apolipoprotein A-I, lecithin:cholesterol acyltransferase and glucocerebrosidase genes in hypoalphalipoproteinemia.	Pubmed	0.0009594	1	0.03081	0.3563	2	4	APOA1,GBA
Pubmed	12551893	Genomic organization and evolution of the CX3CR1/CCR8 chemokine receptor locus.	Pubmed	0.0009594	1	0.03081	0.3563	2	4	CCR8,CX3CR1
Pubmed	19592705	Effects of variations in the APOA1/C3/A4/A5 gene cluster on different parameters of postprandial lipid metabolism in healthy young men.	Pubmed	0.0009594	1	0.03081	0.3563	2	4	APOA1,APOA4
Pubmed	26795633	p38? and ? promote heart hypertrophy by targeting the mTOR-inhibitory protein DEPTOR for degradation.	Pubmed	0.0009594	1	0.03081	0.3563	2	4	MAPK12,DEPTOR
Pubmed	24607281	Subsynaptic localization of nicotinic acetylcholine receptor subunits: a comparative study in the mouse and rat striatum.	Pubmed	0.0009594	1	0.03081	0.3563	2	4	CHRNA7,CHRNB2
Pubmed	21290414	Differential effects of the HESR/HEY transcription factor family on dopamine transporter reporter gene expression via variable number of tandem repeats.	Pubmed	0.0009594	1	0.03081	0.3563	2	4	SLC6A3,HEY1
Pubmed	15953418	G protein-gated inhibitory module of N-type (ca(v)2.2) ca2+ channels.	Pubmed	0.0009594	1	0.03081	0.3563	2	4	CACNA1A,CACNA1B
Pubmed	20377613	Biochemical and functional properties of distinct nicotinic acetylcholine receptors in the superior cervical ganglion of mice with targeted deletions of nAChR subunit genes.	Pubmed	0.0009594	1	0.03081	0.3563	2	4	CHRNA7,CHRNB2
Pubmed	25277212	Calcium-dependent FAK/CREB/TNNC1 signalling mediates the effect of stromal MFAP5 on ovarian cancer metastatic potential.	Pubmed	0.0009594	1	0.03081	0.3563	2	4	PTK2,MFAP5
Pubmed	15378062	BMP signaling inhibits intestinal stem cell self-renewal through suppression of Wnt-beta-catenin signaling.	Pubmed	0.0009594	1	0.03081	0.3563	2	4	NOG,CTNNB1
Pubmed	15252864	Population genetics of apolipoproteins A-IV, E, and H, and the angiotensin converting enzyme (ACE): associations with lipids, and apolipoprotein levels in American Samoans.	Pubmed	0.0009594	1	0.03081	0.3563	2	4	APOA4,APOE
Pubmed	28296015	Constitutional and functional genetics of human alcohol-related hepatocellular carcinoma.	Pubmed	0.0009594	1	0.03081	0.3563	2	4	ARID1A,CTNNB1
Pubmed	8660658	Isolation and sequencing of the rat Coq7 gene and the mapping of mouse Coq7 to chromosome 7.	Pubmed	0.0009594	1	0.03081	0.3563	2	4	APOE,LIPE
Pubmed	24148822	A siRNA screen identifies RAD21, EIF3H, CHRAC1 and TANC2 as driver genes within the 8q23, 8q24.3 and 17q23 amplicons in breast cancer with effects on cell growth, survival and transformation.	Pubmed	0.0009594	1	0.03081	0.3563	2	4	EIF3H,RAD21
Pubmed	26841870	Cooperation of Sox4 with ?-catenin/p300 complex in transcriptional regulation of the Slug gene during divergent sarcomatous differentiation in uterine carcinosarcoma.	Pubmed	0.0009594	1	0.03081	0.3563	2	4	CTNNB1,SOX4
Pubmed	22610508	A conditional allele of Rspo3 reveals redundant function of R-spondins during mouse limb development.	Pubmed	0.0009594	1	0.03081	0.3563	2	4	RSPO2,RSPO1
Pubmed	29630857	The Role of Microglia and Peripheral Monocytes in Retinal Damage after Corneal Chemical Injury.	Pubmed	0.0009594	1	0.03081	0.3563	2	4	CX3CR1,TNFRSF1A
Pubmed	18242177	R-spondin1 synergizes with Wnt3A in inducing osteoblast differentiation and osteoprotegerin expression.	Pubmed	0.0009594	1	0.03081	0.3563	2	4	TNFRSF11B,RSPO1
Pubmed	26648422	MicroRNA?7 suppresses human colon cancer invasion and proliferation by targeting the expression of focal adhesion kinase.	Pubmed	0.0009594	1	0.03081	0.3563	2	4	MMP9,PTK2
Pubmed	8647961	Apolipoprotein A-I is required for cholesteryl ester accumulation in steroidogenic cells and for normal adrenal steroid production.	Pubmed	0.0009594	1	0.03081	0.3563	2	4	APOA1,APOE
Pubmed	10799509	Identification and characterization of CKIP-1, a novel pleckstrin homology domain-containing protein that interacts with protein kinase CK2.	Pubmed	0.0009594	1	0.03081	0.3563	2	4	CSNK2A1,CSNK2B
Pubmed	19135723	Great genotypic and phenotypic diversities associated with copy-number variations of complement C4 and RP-C4-CYP21-TNX (RCCX) modules: a comparison of Asian-Indian and European American populations.	Pubmed	0.0009594	1	0.03081	0.3563	2	4	CYP21A2,C4A
Pubmed	20631684	Neurogenetics and pharmacology of learning, motivation, and cognition.	Pubmed	0.0009594	1	0.03081	0.3563	2	4	SLC6A3,DRD2
Pubmed	11668176	Dual mechanisms for repression of the monomeric orphan receptor liver receptor homologous protein-1 by the orphan small heterodimer partner.	Pubmed	0.0009594	1	0.03081	0.3563	2	4	NR0B2,PTPN6
Pubmed	19723498	Ablation of neutral cholesterol ester hydrolase 1 accelerates atherosclerosis.	Pubmed	0.0009594	1	0.03081	0.3563	2	4	APOE,LIPE
Pubmed	26694816	Small heat shock proteins are induced during multiple sclerosis lesion development in white but not grey matter.	Pubmed	0.0009594	1	0.03081	0.3563	2	4	HSPB6,HSPB8
Pubmed	19057464	Pharmacogenetic association of the APOA1/C3/A4/A5 gene cluster and lipid responses to fenofibrate: the genetics of lipid-lowering drugs and diet network study.	Pubmed	0.0009594	1	0.03081	0.3563	2	4	APOA1,APOA4
Pubmed	9824671	Direct binding of Shc, Grb2, SHP-2 and p40 to the murine granulocyte colony-stimulating factor receptor.	Pubmed	0.0009594	1	0.03081	0.3563	2	4	SHC1,CSF3R
Pubmed	11786908	Death receptors bind SHP-1 and block cytokine-induced anti-apoptotic signaling in neutrophils.	Pubmed	0.0009594	1	0.03081	0.3563	2	4	PTPN6,TNFRSF1A
Pubmed	21419768	Hypoxia-inducible factor-2? mediates the adaptive increase of intestinal ferroportin during iron deficiency in mice.	Pubmed	0.0009594	1	0.03081	0.3563	2	4	SLC40A1,ARNT
Pubmed	18384969	Expression of the small heat shock protein family in the mouse CNS: differential anatomical and biochemical compartmentalization.	Pubmed	0.0009594	1	0.03081	0.3563	2	4	HSPB6,HSPB8
Pubmed	20678555	Genetic markers of striatal dopamine predict individual differences in dysfunctional, but not functional impulsivity.	Pubmed	0.0009594	1	0.03081	0.3563	2	4	SLC6A3,DRD2
Pubmed	22624718	Tetraspanin CD37 directly mediates transduction of survival and apoptotic signals.	Pubmed	0.0009594	1	0.03081	0.3563	2	4	PTPN6,CD37
Pubmed	14638864	Loss of proteolytically processed filaggrin caused by epidermal deletion of Matriptase/MT-SP1.	Pubmed	0.0009594	1	0.03081	0.3563	2	4	ST14,KRT5
Pubmed	17928119	Genetics of Lesch's typology of alcoholism.	Pubmed	0.0009594	1	0.03081	0.3563	2	4	SLC6A3,DRD2
Pubmed	10611353	Retina-specific nuclear receptor: A potential regulator of cellular retinaldehyde-binding protein expressed in retinal pigment epithelium and Müller glial cells.	Pubmed	0.0009594	1	0.03081	0.3563	2	4	RXRB,NR2E3
Pubmed	23913047	Nck-mediated recruitment of BCAP to the BCR regulates the PI(3)K-Akt pathway in B cells.	Pubmed	0.0009594	1	0.03081	0.3563	2	4	NCK2,CD79A
Pubmed	25294940	Partial interchangeability of Fz3 and Fz6 in tissue polarity signaling for epithelial orientation and axon growth and guidance.	Pubmed	0.0009594	1	0.03081	0.3563	2	4	FZD6,KRT8
Pubmed	19369569	Kainate receptors act as conditional amplifiers of spike transmission at hippocampal mossy fiber synapses.	Pubmed	0.0009594	1	0.03081	0.3563	2	4	GRIK2,GRIK3
Pubmed	20576036	Adenosine A1 and A2A receptors are not upstream of caffeine's dopamine D2 receptor-dependent aversive effects and dopamine-independent rewarding effects.	Pubmed	0.0009594	1	0.03081	0.3563	2	4	DDR1,DRD2
Pubmed	17449448	Association in alcoholic patients between psychopathic traits and the additive effect of allelic forms of the CNR1 and FAAH endocannabinoid genes, and the 3' region of the DRD2 gene.	Pubmed	0.0009594	1	0.03081	0.3563	2	4	SLC6A3,DRD2
Pubmed	18794151	Regulation of cyclin D1 RNA stability by SNIP1.	Pubmed	0.0009594	1	0.03081	0.3563	2	4	THRAP3,SNIP1
Pubmed	16731080	Multilocus interactions at maternal tumor necrosis factor-alpha, tumor necrosis factor receptors, interleukin-6 and interleukin-6 receptor genes predict spontaneous preterm labor in European-American women.	Pubmed	0.0009594	1	0.03081	0.3563	2	4	IL6R,TNFRSF1A
Pubmed	27618677	Antipsychotic-like Effects of M4 Positive Allosteric Modulators Are Mediated by CB2 Receptor-Dependent Inhibition of Dopamine Release.	Pubmed	0.0009594	1	0.03081	0.3563	2	4	CNR2,SLC6A3
Pubmed	21664290	Adenomatous polyposis coli protein regulates the cellular response to DNA replication stress.	Pubmed	0.0009594	1	0.03081	0.3563	2	4	CTNNB1,RPA2
Pubmed	23887641	Pharmacological inhibition of the chemokine receptor, CX3CR1, reduces atherosclerosis in mice.	Pubmed	0.0009594	1	0.03081	0.3563	2	4	APOE,CX3CR1
Pubmed	24788416	Insulin resistance aggravates atherosclerosis by reducing vascular smooth muscle cell survival and increasing CX3CL1/CX3CR1 axis.	Pubmed	0.0009594	1	0.03081	0.3563	2	4	APOE,CX3CR1
Pubmed	15370155	The genetic basis for smoking behavior: a systematic review and meta-analysis.	Pubmed	0.0009594	1	0.03081	0.3563	2	4	SLC6A3,DRD2
Pubmed	314952	Location of the gene for theta antigen in the mouse. III. The position of Thy-1 relative to Lap-1 and Mpi-1.	Pubmed	0.0009594	1	0.03081	0.3563	2	4	ME1,ANPEP
Pubmed	12660155	Functional expression of the epithelial Ca(2+) channels (TRPV5 and TRPV6) requires association of the S100A10-annexin 2 complex.	Pubmed	0.0009594	1	0.03081	0.3563	2	4	TRPV6,TRPV5
Pubmed	23031429	A genome-wide association study of monozygotic twin-pairs suggests a locus related to variability of serum high-density lipoprotein cholesterol.	Pubmed	0.0009594	1	0.03081	0.3563	2	4	APOC1,APOE
Pubmed	27363720	KCa 3.1 upregulation preserves endothelium-dependent vasorelaxation during aging and oxidative stress.	Pubmed	0.0009594	1	0.03081	0.3563	2	4	CERS2,KCNN4
Pubmed	28062298	CCL3 and MMP-9 are induced by TL1A during death receptor 3 (TNFRSF25)-dependent osteoclast function and systemic bone loss.	Pubmed	0.0009594	1	0.03081	0.3563	2	4	MMP9,TNFRSF25
Pubmed	12079404	Dystrophin stabilizes alpha 3- but not alpha 7-containing nicotinic acetylcholine receptor subtypes at the postsynaptic apparatus in the mouse superior cervical ganglion.	Pubmed	0.0009594	1	0.03081	0.3563	2	4	CHRNA7,CHRNB2
Pubmed	8541543	Megakaryocyte growth and development factor and interleukin-3 induce patterns of protein-tyrosine phosphorylation that correlate with dominant differentiation over proliferation of mpl-transfected 32D cells.	Pubmed	0.0009594	1	0.03081	0.3563	2	4	SHC1,PTPN6
Pubmed	12643284	Activation of myelin genes during transdifferentiation from melanoma to glial cell phenotype.	Pubmed	0.0009594	1	0.03081	0.3563	2	4	MBP,IL6R
Pubmed	23816881	The casein kinase 2-nrf1 axis controls the clearance of ubiquitinated proteins by regulating proteasome gene expression.	Pubmed	0.0009594	1	0.03081	0.3563	2	4	CSNK2A1,CSNK2B
Pubmed	12746407	Mapping of a de novo unequal crossover causing a deletion of the steroid 21-hydroxylase (CYP21A2) gene and a non-functional hybrid tenascin-X (TNXB) gene.	Pubmed	0.0009594	1	0.03081	0.3563	2	4	CYP21A2,TNXB
Pubmed	21835928	14-3-3 Binding to ataxin-1(ATXN1) regulates its dephosphorylation at Ser-776 and transport to the nucleus.	Pubmed	0.0009594	1	0.03081	0.3563	2	4	U2AF2,ATXN1
Pubmed	20885792	Dementia revealed: novel chromosome 6 locus for late-onset Alzheimer disease provides genetic evidence for folate-pathway abnormalities.	Pubmed	0.0009594	1	0.03081	0.3563	2	4	TOMM40,APOE
Pubmed	16085715	Cyclin-dependent kinase (CDK) phosphorylation destabilizes somatic Wee1 via multiple pathways.	Pubmed	0.0009594	1	0.03081	0.3563	2	4	CSNK2A1,CTNNB1
Pubmed	22209080	Elevated urinary sVCAM-1, IL6, sIL6R and TNFR1 concentrations indicate acute kidney transplant rejection in the first 2 weeks after transplantation.	Pubmed	0.0009594	1	0.03081	0.3563	2	4	IL6R,TNFRSF1A
Pubmed	12214130	Association of novel and established polymorphisms in neuronal nicotinic acetylcholine receptors with sporadic Alzheimer's disease.	Pubmed	0.0009594	1	0.03081	0.3563	2	4	CHRNA7,CHRNB2
Pubmed	17267664	D2 receptors regulate dopamine transporter function via an extracellular signal-regulated kinases 1 and 2-dependent and phosphoinositide 3 kinase-independent mechanism.	Pubmed	0.0009594	1	0.03081	0.3563	2	4	SLC6A3,DRD2
Pubmed	15189737	The chromatin remodeler Mi-2beta is required for CD4 expression and T cell development.	Pubmed	0.0009594	1	0.03081	0.3563	2	4	CHD4,CD4
Pubmed	27563728	RANK-Independent Osteoclast Formation and Bone Erosion in Inflammatory Arthritis.	Pubmed	0.0009594	1	0.03081	0.3563	2	4	TYROBP,IL6R
Pubmed	2885918	Three recessive loci required for insulin-dependent diabetes in nonobese diabetic mice.	Pubmed	0.0009594	1	0.03081	0.3563	2	4	ME1,APOA1
Pubmed	16225851	Interactions of HSP22 (HSPB8) with HSP20, alphaB-crystallin, and HSPB3.	Pubmed	0.0009594	1	0.03081	0.3563	2	4	HSPB6,HSPB8
Pubmed	3865183	Chromosomal location of the gene encoding the neural cell adhesion molecule (N-CAM) in the mouse.	Pubmed	0.0009594	1	0.03081	0.3563	2	4	ANPEP,APOA1
Pubmed	2040452	Tpi-1 and Gapd are linked very closely on mouse chromosome 6.	Pubmed	0.0009594	1	0.03081	0.3563	2	4	GAPDH,TPI1
Pubmed	15823278	Apolipoprotein A-I/C-III/A-IV SstI and apolipoprotein B XbaI polymorphisms and their association with carotid artery intima-media thickness in the Finnish population. The Cardiovascular Risk in Young Finns Study.	Pubmed	0.0009594	1	0.03081	0.3563	2	4	APOA1,APOA4
Pubmed	20205808	Association between dopaminergic polymorphisms and borderline personality traits among at-risk young adults and psychiatric inpatients.	Pubmed	0.0009594	1	0.03081	0.3563	2	4	SLC6A3,DRD2
Pubmed	7794916	Interaction of nucleolar protein B23 with peptides related to nuclear localization signals.	Pubmed	0.0009594	1	0.03081	0.3563	2	4	CSNK2A1,CSNK2B
Pubmed	16314871	Why do young women smoke? I. Direct and interactive effects of environment, psychological characteristics and nicotinic cholinergic receptor genes.	Pubmed	0.0009594	1	0.03081	0.3563	2	4	CHRNA7,CHRNB2
Pubmed	14672952	PTPH1 is a predominant protein-tyrosine phosphatase capable of interacting with and dephosphorylating the T cell receptor zeta subunit.	Pubmed	0.0009594	1	0.03081	0.3563	2	4	PTPN3,PTPN6
Pubmed	25124037	Control of Toll-like receptor-mediated T cell-independent type 1 antibody responses by the inducible nuclear protein I?B-?.	Pubmed	0.0009594	1	0.03081	0.3563	2	4	AICDA,CD79A
Pubmed	16741955	Cdk9 phosphorylates p53 on serine 392 independently of CKII.	Pubmed	0.0009594	1	0.03081	0.3563	2	4	CSNK2A1,CSNK2B
Pubmed	23327593	An analysis of cyclin D1, cytokeratin 5/6 and cytokeratin 8/18 expression in breast papillomas and papillary carcinomas.	Pubmed	0.0009594	1	0.03081	0.3563	2	4	KRT5,KRT8
Pubmed	23284937	Discoidin domain receptors promote ?1?1- and ?2?1-integrin mediated cell adhesion to collagen by enhancing integrin activation.	Pubmed	0.0009594	1	0.03081	0.3563	2	4	ITGA1,DDR1
Pubmed	12196500	Genetic factors associated with the absence of atherosclerosis in octogenarians.	Pubmed	0.0009594	1	0.03081	0.3563	2	4	PON1,APOE
Pubmed	11893784	Altered activities of anti-atherogenic enzymes LCAT, paraoxonase, and platelet-activating factor acetylhydrolase in atherosclerosis-susceptible mice.	Pubmed	0.0009594	1	0.03081	0.3563	2	4	PON1,APOE
Pubmed	17928527	Analysis of mouse LMIR5/CLM-7 as an activating receptor: differential regulation of LMIR5/CLM-7 in mouse versus human cells.	Pubmed	0.0009594	1	0.03081	0.3563	2	4	TYROBP,HCST
Pubmed	9092824	Nucleolar protein B23 stimulates nuclear import of the HIV-1 Rev protein and NLS-conjugated albumin.	Pubmed	0.0009594	1	0.03081	0.3563	2	4	CSNK2A1,CSNK2B
Pubmed	19734902	Genome-wide association study identifies variants at CLU and PICALM associated with Alzheimer's disease.	Pubmed	0.0009594	1	0.03081	0.3563	2	4	TOMM40,APOE
Pubmed	10723723	Organization of the mouse microfibril-associated glycoprotein-2 (MAGP-2) gene.	Pubmed	0.0009594	1	0.03081	0.3563	2	4	MFAP5,M6PR
Pubmed	28661037	AEG-1 induces gastric cancer metastasis by upregulation of eIF4E expression.	Pubmed	0.0009594	1	0.03081	0.3563	2	4	TWIST1,MMP9
Pubmed	18767813	ABCA1 promotes the de novo biogenesis of apolipoprotein CIII-containing HDL particles in vivo and modulates the severity of apolipoprotein CIII-induced hypertriglyceridemia.	Pubmed	0.0009594	1	0.03081	0.3563	2	4	APOA1,APOE
Pubmed	28600110	RSPO2 suppresses colorectal cancer metastasis by counteracting the Wnt5a/Fzd7-driven noncanonical Wnt pathway.	Pubmed	0.0009594	1	0.03081	0.3563	2	4	FZD7,RSPO2
Pubmed	17035101	Dynamic expression of R-spondin family genes in mouse development.	Pubmed	0.0009594	1	0.03081	0.3563	2	4	RSPO2,RSPO1
Pubmed	15023525	Ksp-cadherin is a functional cell-cell adhesion molecule related to LI-cadherin.	Pubmed	0.0009594	1	0.03081	0.3563	2	4	CTNNB1,CDH17
Pubmed	16931800	Hyperhomocysteinemia decreases circulating high-density lipoprotein by inhibiting apolipoprotein A-I Protein synthesis and enhancing HDL cholesterol clearance.	Pubmed	0.0009594	1	0.03081	0.3563	2	4	APOA1,APOE
Pubmed	17893706	Genetic variation in components of dopamine neurotransmission impacts ventral striatal reactivity associated with impulsivity.	Pubmed	0.0009594	1	0.03081	0.3563	2	4	SLC6A3,DRD2
Pubmed	19553439	Complexin-I is required for high-fidelity transmission at the endbulb of Held auditory synapse.	Pubmed	0.0009594	1	0.03081	0.3563	2	4	CPLX4,CPLX3
Pubmed	27806189	Effect of the Interplay Between Genetic and Behavioral Risks on Survival After Age 75.	Pubmed	0.0009594	1	0.03081	0.3563	2	4	APOC1,APOE
Pubmed	22683321	Epistatic interactions implicating dopaminergic genes in bulimia nervosa (BN): relationships to eating- and personality-related psychopathology.	Pubmed	0.0009594	1	0.03081	0.3563	2	4	SLC6A3,DRD2
Pubmed	10523670	HDAC4, a human histone deacetylase related to yeast HDA1, is a transcriptional corepressor.	Pubmed	0.0009594	1	0.03081	0.3563	2	4	MEF2D,HDAC9
Pubmed	22232963	[Research on associations between selected polymorphisms of genes DRD2, 5HTT, GRIK3, ADH4 and alcohol dependence syndrome].	Pubmed	0.0009594	1	0.03081	0.3563	2	4	DRD2,GRIK3
Pubmed	24885636	Tumor-associated macrophage-derived IL-6 and IL-8 enhance invasive activity of LoVo cells induced by PRL-3 in a KCNN4 channel-dependent manner.	Pubmed	0.0009594	1	0.03081	0.3563	2	4	KCNN4,PTP4A3
Pubmed	27693698	Identification of a new sweat gland progenitor population in mice and the role of their niche in tissue development.	Pubmed	0.0009594	1	0.03081	0.3563	2	4	KRT5,KRT8
Pubmed	26929359	Disrupted iron homeostasis causes dopaminergic neurodegeneration in mice.	Pubmed	0.0009594	1	0.03081	0.3563	2	4	SLC40A1,SLC6A3
Pubmed	11414770	Cloning, expression patterns, and chromosome localization of three human and two mouse homologues of GABA(A) receptor-associated protein.	Pubmed	0.0009594	1	0.03081	0.3563	2	4	GABARAP,GABARAPL1
Pubmed	11368516	Short heterodimer partner (SHP) orphan nuclear receptor inhibits the transcriptional activity of aryl hydrocarbon receptor (AHR)/AHR nuclear translocator (ARNT).	Pubmed	0.0009594	1	0.03081	0.3563	2	4	NR0B2,ARNT
Pubmed	6190740	H-2 S region determined polymorphic variants of the C4, Slp, C2, and B complement proteins: a compilation.	Pubmed	0.0009594	1	0.03081	0.3563	2	4	MBP,C4A
Pubmed	26368306	Perhexiline activates KLF14 and reduces atherosclerosis by modulating ApoA-I production.	Pubmed	0.0009594	1	0.03081	0.3563	2	4	APOA1,APOE
Pubmed	15218032	Phosphorylation by protein kinase CK2 modulates the activity of the ATP binding cassette A1 transporter.	Pubmed	0.0009594	1	0.03081	0.3563	2	4	CSNK2A1,CSNK2B
Pubmed	8776723	Evidence for the direct interaction of the insulin-like growth factor I receptor with IRS-1, Shc, and Grb10.	Pubmed	0.0009594	1	0.03081	0.3563	2	4	SHC1,GRB10
Pubmed	25274307	Loss of signalling via G?13 in germinal centre B-cell-derived lymphoma.	Pubmed	0.0009594	1	0.03081	0.3563	2	4	ARHGEF1,CD79A
Pubmed	8943850	CD10/neutral endopeptidase 24.11 is phosphorylated by casein kinase II and coassociates with other phosphoproteins including the lyn src-related kinase.	Pubmed	0.0009594	1	0.03081	0.3563	2	4	CSNK2A1,CSNK2B
Pubmed	12512701	The role of G protein beta subunits in the release of ATP from human erythrocytes.	Pubmed	0.0009594	1	0.03081	0.3563	2	4	GNB3,GNB4
Pubmed	15723517	Interactions of the HIV-1 Tat and RAP74 proteins with the RNA polymerase II CTD phosphatase FCP1.	Pubmed	0.0009594	1	0.03081	0.3563	2	4	CSNK2A1,CSNK2B
Pubmed	9915703	Prevention of constitutive TNF receptor 1 signaling by silencer of death domains.	Pubmed	0.0009594	1	0.03081	0.3563	2	4	TNFRSF25,TNFRSF1A
Pubmed	23963447	Microfibril-associated glycoprotein 2 (MAGP2) loss of function has pleiotropic effects in vivo.	Pubmed	0.0009594	1	0.03081	0.3563	2	4	MFAP2,MFAP5
Pubmed	19251634	Signal adaptor DAP10 associates with MDL-1 and triggers osteoclastogenesis in cooperation with DAP12.	Pubmed	0.0009594	1	0.03081	0.3563	2	4	TYROBP,HCST
Pubmed	18852254	MMP-9 and -12 cause N-cadherin shedding and thereby beta-catenin signalling and vascular smooth muscle cell proliferation.	Pubmed	0.0009594	1	0.03081	0.3563	2	4	MMP9,CTNNB1
Pubmed	25692331	Expression of the synaptic exocytosis-regulating molecule complexin 2 in taste buds and its participation in peripheral taste transduction.	Pubmed	0.0009594	1	0.03081	0.3563	2	4	CPLX4,CPLX3
Pubmed	20354107	Systemic levels of G-CSF and interleukin-6 determine the angiogenic potential of bone marrow resident monocytes.	Pubmed	0.0009594	1	0.03081	0.3563	2	4	CSF3R,CX3CR1
Pubmed	12397177	Potentiation of serum response factor activity by a family of myocardin-related transcription factors.	Pubmed	0.0009594	1	0.03081	0.3563	2	4	MRTFA,MYOCD
Pubmed	24963147	IgE actions on CD4+ T cells, mast cells, and macrophages participate in the pathogenesis of experimental abdominal aortic aneurysms.	Pubmed	0.0009594	1	0.03081	0.3563	2	4	APOE,CD4
Pubmed	20210499	Polymorphisms in dopamine system genes are associated with individual differences in attention in infancy.	Pubmed	0.0009594	1	0.03081	0.3563	2	4	SLC6A3,DRD2
Pubmed	17206937	Pathway of biogenesis of apolipoprotein E-containing HDL in vivo with the participation of ABCA1 and LCAT.	Pubmed	0.0009594	1	0.03081	0.3563	2	4	APOA1,APOE
Pubmed	27090492	Neuropeptide Y Induces Hematopoietic Stem/Progenitor Cell Mobilization by Regulating Matrix Metalloproteinase-9 Activity Through Y1 Receptor in Osteoblasts.	Pubmed	0.0009594	1	0.03081	0.3563	2	4	MMP9,NPY
Pubmed	15294961	A Structural basis for the association of DAP12 with mouse, but not human, NKG2D.	Pubmed	0.0009594	1	0.03081	0.3563	2	4	TYROBP,HCST
Pubmed	11378439	Phosphorylation of the Fas associated factor FAF1 by protein kinase CK2 and identification of serines 289 and 291 as the in vitro phosphorylation sites.	Pubmed	0.0009594	1	0.03081	0.3563	2	4	CSNK2A1,CSNK2B
Pubmed	19217440	Influence of cholesteryl ester transfer protein, peroxisome proliferator-activated receptor alpha, apolipoprotein E, and apolipoprotein A-I polymorphisms on high-density lipoprotein cholesterol, apolipoprotein A-I, lipoprotein A-I, and lipoprotein A-I:A-II concentrations: the Prospective Epidemiological Study of Myocardial Infarction study.	Pubmed	0.0009594	1	0.03081	0.3563	2	4	APOA1,APOE
Pubmed	12811828	Modulation of PAI-1 and proMMP-9 syntheses by soluble TNFalpha and its receptors during differentiation of the human monocytic HL-60 cell line.	Pubmed	0.0009594	1	0.03081	0.3563	2	4	MMP9,TNFRSF1A
Pubmed	19011756	KIF5C: a new binding partner for protein kinase CK2 with a preference for the CK2alpha' subunit.	Pubmed	0.0009594	1	0.03081	0.3563	2	4	CSNK2A1,CSNK2B
Pubmed	22288519	Transcriptional factors for epithelial-mesenchymal transition are associated with mesenchymal differentiation in gliosarcoma.	Pubmed	0.0009594	1	0.03081	0.3563	2	4	TWIST1,MMP9
Pubmed	28987665	Altered spontaneous brain activity pattern in cognitively normal young adults carrying mutations of APP, presenilin-1/2 and APOE ?4.	Pubmed	0.0009594	1	0.03081	0.3563	2	4	APLP1,APOE
Pubmed	9407077	Properties and phosphorylation sites of baculovirus-expressed nuclear inhibitor of protein phosphatase-1 (NIPP-1).	Pubmed	0.0009594	1	0.03081	0.3563	2	4	PPP1R8,CSNK2A1
Pubmed	17200718	Monocyte subsets differentially employ CCR2, CCR5, and CX3CR1 to accumulate within atherosclerotic plaques.	Pubmed	0.0009594	1	0.03081	0.3563	2	4	APOE,CX3CR1
Pubmed	12450396	Prointerleukin-16 contains a functional CcN motif that regulates nuclear localization.	Pubmed	0.0009594	1	0.03081	0.3563	2	4	CSNK2A1,IL16
Pubmed	18443916	Study on a possible effect of four longevity candidate genes (ACE, PON1, PPAR-gamma, and APOE) on human fertility.	Pubmed	0.0009594	1	0.03081	0.3563	2	4	PON1,APOE
Pubmed	18274205	Common variants APOC3, APOA5, APOE and PON1 are associated with variation in plasma lipoprotein traits in Greenlanders.	Pubmed	0.0009594	1	0.03081	0.3563	2	4	PON1,APOE
Pubmed	25463085	Tissue-specific DNA methylation profiles regulate liver-specific expression of the APOA1/C3/A4/A5 cluster and can be manipulated with demethylating agents on intestinal cells.	Pubmed	0.0009594	1	0.03081	0.3563	2	4	APOA1,APOA4
Pubmed	17339461	Capture of target cell membrane components via trogocytosis is triggered by a selected set of surface molecules on T or B cells.	Pubmed	0.0009594	1	0.03081	0.3563	2	4	CD4,CD27
Pubmed	26283199	Constitutive and ghrelin-dependent GHSR1a activation impairs CaV2.1 and CaV2.2 currents in hypothalamic neurons.	Pubmed	0.0009594	1	0.03081	0.3563	2	4	CACNA1A,CACNA1B
Pubmed	7720710	High mobility group protein 2 functionally interacts with the POU domains of octamer transcription factors.	Pubmed	0.0009594	1	0.03081	0.3563	2	4	POU2F2,POU3F1
Pubmed	15534368	Role of CCR8 and other chemokine pathways in the migration of monocyte-derived dendritic cells to lymph nodes.	Pubmed	0.0009594	1	0.03081	0.3563	2	4	CCR8,CX3CR1
Pubmed	20639459	Endogenous matrix metalloproteinases 2 and 9 regulate activation of CD4+ and CD8+ T cells.	Pubmed	0.0009594	1	0.03081	0.3563	2	4	MMP9,CD4
Pubmed	21270893	Distinct physiological and behavioural functions for parental alleles of imprinted Grb10.	Pubmed	0.0009594	1	0.03081	0.3563	2	4	SLC6A3,GRB10
Pubmed	10491318	Phosphorylation of ribosomal protein L5 by protein kinase CKII decreases its 5S rRNA binding activity.	Pubmed	0.0009594	1	0.03081	0.3563	2	4	CSNK2A1,CSNK2B
Pubmed	19937336	Cytokeratin expression during mouse embryonic and early postnatal mammary gland development.	Pubmed	0.0009594	1	0.03081	0.3563	2	4	KRT5,KRT8
Pubmed	10594021	The orphan nuclear receptor SHP inhibits hepatocyte nuclear factor 4 and retinoid X receptor transactivation: two mechanisms for repression.	Pubmed	0.0009594	1	0.03081	0.3563	2	4	RXRB,NR0B2
Pubmed	15845322	Genetic influences on quantity of alcohol consumed by adolescents and young adults.	Pubmed	0.0009594	1	0.03081	0.3563	2	4	SLC6A3,DRD2
Pubmed	9632656	Cooperative function of POU proteins and SOX proteins in glial cells.	Pubmed	0.0009594	1	0.03081	0.3563	2	4	POU3F2,SOX4
Pubmed	11804551	Coreceptor utilization of HIV type 1 subtype E viral isolates from Thai men with HIV type 1-infected and uninfected wives.	Pubmed	0.0009594	1	0.03081	0.3563	2	4	CCR8,CX3CR1
Pubmed	19724058	MAL/SRF complex is involved in platelet formation and megakaryocyte migration by regulating MYL9 (MLC2) and MMP9.	Pubmed	0.0009594	1	0.03081	0.3563	2	4	MMP9,MRTFA
Pubmed	17991879	The histone demethylase, Jmjd1a, interacts with the myocardin factors to regulate SMC differentiation marker gene expression.	Pubmed	0.0009594	1	0.03081	0.3563	2	4	MRTFA,MYOCD
Pubmed	15489024	Role of neuronal nicotinic receptors in the effects of nicotine and ethanol on contextual fear conditioning.	Pubmed	0.0009594	1	0.03081	0.3563	2	4	CHRNA7,CHRNB2
Pubmed	18022370	LIMP-2 is a receptor for lysosomal mannose-6-phosphate-independent targeting of beta-glucocerebrosidase.	Pubmed	0.0009594	1	0.03081	0.3563	2	4	GBA,M6PR
Pubmed	28219935	Novel Insights into Gastric Cancer: Methylation of R-spondins and Regulation of LGR5 by SP1.	Pubmed	0.0009594	1	0.03081	0.3563	2	4	RSPO2,RSPO1
Pubmed	25604058	Apolipoprotein E promotes subretinal mononuclear phagocyte survival and chronic inflammation in age-related macular degeneration.	Pubmed	0.0009594	1	0.03081	0.3563	2	4	APOE,CX3CR1
Pubmed	7515480	SH2 domain specificity and activity modified by a single residue.	Pubmed	0.0009594	1	0.03081	0.3563	2	4	SHC1,PTK2
Pubmed	17251429	Regulation of Akt signaling by D2 and D3 dopamine receptors in vivo.	Pubmed	0.0009594	1	0.03081	0.3563	2	4	SLC6A3,DRD2
Pubmed	17457002	Apolipoprotein A-I/C-III/A-IV SstI and apolipoprotein B XbaI polymorphisms do not affect early functional and structural changes in atherosclerosis: the Cardiovascular Risk in Young Finns study.	Pubmed	0.0009594	1	0.03081	0.3563	2	4	APOA1,APOA4
Pubmed	19290049	PIM2 Induced COX-2 and MMP-9 expression in macrophages requires PI3K and Notch1 signaling.	Pubmed	0.0009594	1	0.03081	0.3563	2	4	MMP9,PIM2
Pubmed	19941816	EGF-induced ERK activation promotes CK2-mediated disassociation of alpha-Catenin from beta-Catenin and transactivation of beta-Catenin.	Pubmed	0.0009594	1	0.03081	0.3563	2	4	CSNK2A1,CTNNB1
Pubmed	29743491	Classical and alternative complement activation on photoreceptor outer segments drives monocyte-dependent retinal atrophy.	Pubmed	0.0009594	1	0.03081	0.3563	2	4	CX3CR1,C4A
Pubmed	14732464	Polymorphisms of dopamine receptor and transporter genes and hallucinations in Parkinson's disease.	Pubmed	0.0009594	1	0.03081	0.3563	2	4	SLC6A3,DRD2
Pubmed	23396188	Beta-catenin (CTNNB1) induces Bmp expression in urogenital sinus epithelium and participates in prostatic bud initiation and patterning.	Pubmed	0.0009594	1	0.03081	0.3563	2	4	CHRNA7,CTNNB1
Pubmed	22666322	Nicotinic receptor Alpha7 expression during tooth morphogenesis reveals functional pleiotropy.	Pubmed	0.0009594	1	0.03081	0.3563	2	4	CHRNA7,AIF1
Pubmed	16260653	Dual function of focal adhesion kinase in regulating integrin-induced MMP-2 and MMP-9 release by human T lymphoid cells.	Pubmed	0.0009594	1	0.03081	0.3563	2	4	MMP9,PTK2
Pubmed	10049721	Calmodulin functions as an activator of Pur alpha binding to single-stranded purine-rich DNA elements (PUR elements).	Pubmed	0.0009594	1	0.03081	0.3563	2	4	MBP,NPY
Pubmed	15963492	Nicotinic receptors regulate B lymphocyte activation and immune response.	Pubmed	0.0009594	1	0.03081	0.3563	2	4	CHRNA7,CHRNB2
Pubmed	22075476	Metastasis-associated protein 3 (MTA3) regulates G2/M progression in proliferating mouse granulosa cells.	Pubmed	0.0009594	1	0.03081	0.3563	2	4	CHD4,RAD21
Pubmed	19701693	Genetic variants on apolipoprotein gene cluster influence triglycerides with a risk of coronary artery disease among Indians.	Pubmed	0.0009594	1	0.03081	0.3563	2	4	APOA1,APOA4
Pubmed	28387812	Gene-based association studies report genetic links for clinical subtypes of frontotemporal dementia.	Pubmed	0.0009594	1	0.03081	0.3563	2	4	TOMM40,APOE
Pubmed	18559419	Phosphorylation by casein kinase 2 facilitates rRNA gene transcription by promoting dissociation of TIF-IA from elongating RNA polymerase I.	Pubmed	0.0009594	1	0.03081	0.3563	2	4	CSNK2A1,CSNK2B
Pubmed	20674306	The APOA1/C3/A4/A5 cluster and markers of allostatic load in the Boston Puerto Rican Health Study.	Pubmed	0.0009594	1	0.03081	0.3563	2	4	APOA1,APOA4
Pubmed	26552429	Variant mapping and mutation discovery in inbred mice using next-generation sequencing.	Pubmed	0.0009594	1	0.03081	0.3563	2	4	ADAR,CLCN1
Pubmed	12511551	Role of protein kinase CK2 phosphorylation in the molecular chaperone activity of nucleolar protein b23.	Pubmed	0.0009594	1	0.03081	0.3563	2	4	CSNK2A1,CSNK2B
Pubmed	23708657	Identification of novel TMPRSS2:ERG mechanisms in prostate cancer metastasis: involvement of MMP9 and PLXNA2.	Pubmed	0.0009594	1	0.03081	0.3563	2	4	MMP9,PLXNA2
Pubmed	23181698	Differential configurations involving binding of USF transcription factors and Twist1 regulate Alx3 promoter activity in mesenchymal and pancreatic cells.	Pubmed	0.0009594	1	0.03081	0.3563	2	4	TWIST1,USF2
Pubmed	19764934	The interaction of reward genes with environmental factors in contribution to alcoholism in mexican americans.	Pubmed	0.0009594	1	0.03081	0.3563	2	4	SLC6A3,DRD2
Pubmed	21123754	Genome-wide association study of CSF biomarkers Abeta1-42, t-tau, and p-tau181p in the ADNI cohort.	Pubmed	0.0009594	1	0.03081	0.3563	2	4	TOMM40,APOE
Pubmed	20700730	Microarray analysis of differentially expressed genes in vaginal tissues in postmenopausal women. The role of stress urinary incontinence.	Pubmed	0.0009594	1	0.03081	0.3563	2	4	APOE,GBA
Pubmed	19542537	CK2-dependent phosphorylation determines cellular localization and stability of ataxin-3.	Pubmed	0.0009594	1	0.03081	0.3563	2	4	CSNK2A1,CSNK2B
Pubmed	12172780	Developmental and spatial expression pattern of syntaxin 13 in the mouse central nervous system.	Pubmed	0.0009594	1	0.03081	0.3563	2	4	STX12,SV2B
Pubmed	25483588	The MAP1B-LC1/UBE2L3 complex catalyzes degradation of cell surface CaV2.2 channels.	Pubmed	0.0009594	1	0.03081	0.3563	2	4	CACNA1A,CACNA1B
Pubmed	20727736	C-reactive protein-associated genetic variants and cancer risk: findings from FINRISK 1992, FINRISK 1997 and Health 2000 studies.	Pubmed	0.0009594	1	0.03081	0.3563	2	4	APOE,IL6R
Pubmed	17890294	Expression of Cyp21a1 and Cyp11b1 in the fetal mouse testis.	Pubmed	0.0009594	1	0.03081	0.3563	2	4	CYP11B2,CYP21A2
Pubmed	6316336	Molecular map of the murine S region.	Pubmed	0.0009594	1	0.03081	0.3563	2	4	CYP21A2,C4A
Pubmed	11771745	Changes in nicotinic acetylcholine receptor subunits expression in brain of patients with Down syndrome and Alzheimer's disease.	Pubmed	0.0009594	1	0.03081	0.3563	2	4	CHRNA7,CHRNB2
Pubmed	8617223	ZnT-2, a mammalian protein that confers resistance to zinc by facilitating vesicular sequestration.	Pubmed	0.0009594	1	0.03081	0.3563	2	4	EPHB2,EPB41
Pubmed	27891591	NOR1 Suppresses Cancer Stem-Like Cells Properties of Tumor Cells via the Inhibition of the AKT-GSK-3?-Wnt/?-catenin-ALDH1A1 Signal Circuit.	Pubmed	0.0009594	1	0.03081	0.3563	2	4	CTNNB1,NR4A3
Pubmed	10395741	Interactions of nuclear receptor coactivator/corepressor proteins with the aryl hydrocarbon receptor complex.	Pubmed	0.0009594	1	0.03081	0.3563	2	4	ARNT,NCOA7
Pubmed	19433579	Hemoglobin and its scavenger protein haptoglobin associate with apoA-1-containing particles and influence the inflammatory properties and function of high density lipoprotein.	Pubmed	0.0009594	1	0.03081	0.3563	2	4	APOA1,APOE
Pubmed	18219093	Protective effect of R allele of PON1 gene on the coronary artery disease in the presence of specific genetic background.	Pubmed	0.0009594	1	0.03081	0.3563	2	4	PON1,APOE
Pubmed	2652811	Mapping and sequencing analysis of the rat MHC.	Pubmed	0.0009594	1	0.03081	0.3563	2	4	CYP21A2,C4A
Pubmed	17890222	Enhanced formation of a HCO3- transport metabolon in exocrine cells of Nhe1-/- mice.	Pubmed	0.0009594	1	0.03081	0.3563	2	4	SLC9A1,CA2
Pubmed	29666061	Deptor Is a Novel Target of Wnt/?-Catenin/c-Myc and Contributes to Colorectal Cancer Cell Growth.	Pubmed	0.0009594	1	0.03081	0.3563	2	4	DEPTOR,CTNNB1
Pubmed	11535139	Phosphorylation of the leucocyte NADPH oxidase subunit p47(phox) by casein kinase 2: conformation-dependent phosphorylation and modulation of oxidase activity.	Pubmed	0.0009594	1	0.03081	0.3563	2	4	CSNK2A1,CSNK2B
Pubmed	19732897	Associations of polymorphisms in the apolipoprotein A1/C3/A4/A5 gene cluster with familial combined hyperlipidaemia in Hong Kong Chinese.	Pubmed	0.0009594	1	0.03081	0.3563	2	4	APOA1,APOA4
Pubmed	22408582	Generational association studies of dopaminergic genes in reward deficiency syndrome (RDS) subjects: selecting appropriate phenotypes for reward dependence behaviors.	Pubmed	0.0009594	1	0.03081	0.3563	2	4	SLC6A3,DRD2
Pubmed	12954862	Distribution of kainate receptor subunits at hippocampal mossy fiber synapses.	Pubmed	0.0009594	1	0.03081	0.3563	2	4	GRIK2,GRIK3
Pubmed	15654758	Apolipoprotein E is the major physiological activator of lecithin-cholesterol acyltransferase (LCAT) on apolipoprotein B lipoproteins.	Pubmed	0.0009594	1	0.03081	0.3563	2	4	APOA1,APOE
Pubmed	2470348	Soluble bovine galactose-binding lectin. cDNA cloning reveals the complete amino acid sequence and an antigenic relationship with the major encephalitogenic domain of myelin basic protein.	Pubmed	0.0009594	1	0.03081	0.3563	2	4	LENG8,ATP8B2
Pubmed	27114609	Continuous inhibitory signaling by both SHP-1 and SHIP-1 pathways is required to maintain unresponsiveness of anergic B cells.	Pubmed	0.0009594	1	0.03081	0.3563	2	4	PTPN6,CD79A
Pubmed	16710093	Evidence for consistent intragenic and intergenic interactions between SNP effects in the APOA1/C3/A4/A5 gene cluster.	Pubmed	0.0009594	1	0.03081	0.3563	2	4	APOA1,APOA4
Pubmed	19299560	A large-scale functional RNAi screen reveals a role for CK2 in the mammalian circadian clock.	Pubmed	0.0009594	1	0.03081	0.3563	2	4	CSNK2A1,CSNK2B
Pubmed	10531036	Regulation of ARNO nucleotide exchange by a PH domain electrostatic switch.	Pubmed	0.0009594	1	0.03081	0.3563	2	4	CYTH2,PRKCG
Pubmed	12486127	Manipulation of EphB2 regulatory motifs and SH2 binding sites switches MAPK signaling and biological activity.	Pubmed	0.0009594	1	0.03081	0.3563	2	4	EPHB2,SHC1
Pubmed	9242494	Functions of the POU domain genes Skn-1a/i and Tst-1/Oct-6/SCIP in epidermal differentiation.	Pubmed	0.0009594	1	0.03081	0.3563	2	4	POU2F2,POU3F1
Pubmed	9446609	Sequence, structure, and chromosomal mapping of the mouse Lgals6 gene, encoding galectin-6.	Pubmed	0.0009594	1	0.03081	0.3563	2	4	APOE,LIPE
Pubmed	27920254	Casein Kinase 2 Is Linked to Stress Granule Dynamics through Phosphorylation of the Stress Granule Nucleating Protein G3BP1.	Pubmed	0.0009594	1	0.03081	0.3563	2	4	CSNK2A1,CSNK2B
Pubmed	16204380	Requirement of myocardin-related transcription factor-B for remodeling of branchial arch arteries and smooth muscle differentiation.	Pubmed	0.0009594	1	0.03081	0.3563	2	4	MRTFA,MYOCD
Pubmed	20484116	TREM2- and DAP12-dependent activation of PI3K requires DAP10 and is inhibited by SHIP1.	Pubmed	0.0009594	1	0.03081	0.3563	2	4	TYROBP,HCST
Pubmed	17378725	Polymorphisms in the APOA1/C3/A4/A5 gene cluster and cholesterol responsiveness to dietary change.	Pubmed	0.0009594	1	0.03081	0.3563	2	4	APOA1,APOA4
Pubmed	18439552	Polymorphisms of the HNF1A gene encoding hepatocyte nuclear factor-1 alpha are associated with C-reactive protein.	Pubmed	0.0009594	1	0.03081	0.3563	2	4	TOMM40,APOE
Pubmed	25902538	Identification of DNA cleavage- and recombination-specific hnRNP cofactors for activation-induced cytidine deaminase.	Pubmed	0.0009594	1	0.03081	0.3563	2	4	AICDA,ANKRD28
Pubmed	23058914	Identification of CK2 as the kinase that phosphorylates Pax3 at Ser209 in early myogenic differentiation.	Pubmed	0.0009594	1	0.03081	0.3563	2	4	CSNK2A1,CSNK2B
Pubmed	19828641	The adaptor protein Shc plays a key role during early B cell development.	Pubmed	0.0009594	1	0.03081	0.3563	2	4	SHC1,CD79A
Pubmed	24184055	Germinal center centroblasts transition to a centrocyte phenotype according to a timed program and depend on the dark zone for effective selection.	Pubmed	0.0009594	1	0.03081	0.3563	2	4	AICDA,CD79A
Pubmed	18678879	The apolipoprotein CIII enhancer regulates both extensive histone modification and intergenic transcription of human apolipoprotein AI/CIII/AIV genes but not apolipoprotein AV.	Pubmed	0.0009594	1	0.03081	0.3563	2	4	APOA1,APOA4
Pubmed	8372604	Twin genes and endocrine disease: CYP21 and CYP11B genes.	Pubmed	0.0009594	1	0.03081	0.3563	2	4	CYP11B2,CYP21A2
Pubmed	19454010	In vitro nuclear interactome of the HIV-1 Tat protein.	Pubmed	0.0009644	1	0.03081	0.3563	9	195	ZNF384,CHD4,ARID1A,ADAR,SOX4,EIF3E,DAP3,NCAPD2,NOP2
Pubmed	10737800	Shotgun sequencing of the human transcriptome with ORF expressed sequence tags.	Pubmed	0.000988	1	0.03081	0.3563	16	510	RXRB,NLRC5,ADAMTSL4,NKD2,CSNK2A1,ZNF335,CIC,DDX6,PVR,NAV2,ULK4,CACNA1A,GRIK3,SH3D21,CKAP2L,TNXB
Pubmed	18513389	New application of intelligent agents in sporadic amyotrophic lateral sclerosis identifies unexpected specific genetic background.	Pubmed	0.001004	1	0.03081	0.3563	4	35	PON1,APOA4,APOE,GNB3
Pubmed	19060911	Loci influencing lipid levels and coronary heart disease risk in 16 European population cohorts.	Pubmed	0.001004	1	0.03081	0.3563	4	35	TOMM40,APOA1,APOA4,APOE
Pubmed	26108225	A compendium of expression patterns of cholesterol biosynthetic enzymes in the mouse embryo.	Pubmed	0.001004	1	0.03081	0.3563	4	35	FDPS,CYP11B2,CYP21A2,SQLE
Pubmed	19068216	Investigation of Crohn's disease risk loci in ulcerative colitis further defines their molecular relationship.	Pubmed	0.001023	1	0.03081	0.3563	3	16	CDKAL1,ECM1,FGFR1OP
Pubmed	25425146	Neural progenitor cells orchestrate microglia migration and positioning into the developing cortex.	Pubmed	0.001023	1	0.03081	0.3563	3	16	AIF1,CTNNB1,CX3CR1
Pubmed	19944766	A pilot multivariate parallel ICA study to investigate differential linkage between neural networks and genetic profiles in schizophrenia.	Pubmed	0.001023	1	0.03081	0.3563	3	16	CHRNA7,SLC6A3,DRD2
Pubmed	27546376	Transcriptional targets of TWIST1 in the cranial mesoderm regulate cell-matrix interactions and mesenchyme maintenance.	Pubmed	0.001023	1	0.03081	0.3563	3	16	TWIST1,GLIPR2,EVA1B
Pubmed	23362346	Cbx4 regulates the proliferation of thymic epithelial cells and thymus function.	Pubmed	0.001023	1	0.03081	0.3563	3	16	KRT5,KRT8,CD86
Pubmed	19294699	Proteomic analysis of GTP cyclohydrolase 1 multiprotein complexes in cultured normal adult human astrocytes under both basal and cytokine-activated conditions.	Pubmed	0.001023	1	0.03081	0.3563	3	16	MAPK12,CSNK2A1,CSNK2B
Pubmed	22268729	Proteomic identification of common SCF ubiquitin ligase FBXO6-interacting glycoproteins in three kinds of cells.	Pubmed	0.001042	1	0.03081	0.3563	18	613	RPS9,ADAR,TMEM245,ADAMTSL4,COL4A2,EMC2,CTPS1,GAPDH,EIF3E,GBA,VWDE,DDX6,FBXL5,COPS7A,ANKRD28,GNB4,M6PR,RPL18
Pubmed	23431145	The protomap is propagated to cortical plate neurons through an Eomes-dependent intermediate map.	Pubmed	0.001058	1	0.03081	0.3563	6	90	CHRNA7,SV2B,NAV2,NR4A3,HEY1,TSHZ1
Pubmed	1602151	Treatment of Haemophilus aphrophilus endocarditis with ciprofloxacin.	Pubmed	0.001058	1	0.03081	0.3563	6	90	PKLR,APCS,HSPB6,GAPDH,CA2,TPI1
Pubmed	16712791	Identification of intrahepatic cholangiocarcinoma related genes by comparison with normal liver tissues using expressed sequence tags.	Pubmed	0.001092	1	0.03081	0.3563	15	466	MBP,RPS19,MAPK12,FXYD3,COL4A2,PON1,MSH5,GALNT1,PSENEN,RRAGC,LIN37,SMPDL3B,TAX1BP1,UBE2C,RPA2
Pubmed	16097034	Global phosphoproteome analysis on human HepG2 hepatocytes using reversed-phase diagonal LC.	Pubmed	0.001118	1	0.03081	0.3563	4	36	U2AF2,PLEC,CTPS1,SETDB1
Pubmed	18193043	Newly identified loci that influence lipid concentrations and risk of coronary artery disease.	Pubmed	0.001118	1	0.03081	0.3563	4	36	APOA1,APOA4,APOC1,APOE
Pubmed	15057824	The DNA sequence and biology of human chromosome 19.	Pubmed	0.001133	1	0.03081	0.3563	11	283	USF2,FPR1,XRCC1,HSPB6,SBK3,KMT2B,CIC,LIN37,PVR,GAPDHS,CACNA1A
Pubmed	8619474	A "double adaptor" method for improved shotgun library construction.	Pubmed	0.001181	1	0.03081	0.3563	17	569	ADCY2,STX12,USF2,DERL1,CROT,UBXN11,FLAD1,RIMS2,GAPDH,RRAGC,FBXL5,SNAP91,SV2B,KIFC2,PAK3,RNF41,NAGPA
Pubmed	16147992	Analysis of BCL6-interacting proteins by tandem mass spectrometry.	Pubmed	0.001182	1	0.03081	0.3563	5	62	KDM2A,HDAC9,KMT2B,DDX6,CACNA1A
Pubmed	21440680	Genes expressed in Atoh1 neuronal lineages arising from the r1/isthmus rhombic lip.	Pubmed	0.001186	1	0.03081	0.3563	6	92	DSCC1,PLXNA2,NXPH1,SNED1,MTBP,NCAPD2
Pubmed	21145461	Dynamics of cullin-RING ubiquitin ligase network revealed by systematic quantitative proteomics.	Pubmed	0.001191	1	0.03081	0.3563	37	1696	RPS9,CBX3,U2AF2,RPS19,ARID1A,ADAR,LENG8,AGO3,PLEC,AMPD1,XRCC1,PARP14,IBTK,MRPS15,ZFR,CTNNB1,TNKS2,CTPS1,WDTC1,GAPDH,NDUFV1,DDX6,FBXL5,COPS7A,NOP2,THRAP3,CA2,KRT5,GRWD1,RBM4B,KRT84,GTPBP10,ARHGEF1,GAN,RPA2,RPL18,TPI1
Pubmed	20932939	Screening large numbers of expression patterns of transcription factors in late stages of the mouse thymus.	Pubmed	0.001229	1	0.03081	0.3563	10	243	RXRB,FHL3,NR0B2,POU2F2,POU3F2,CIC,KRT5,KRT8,NR2E3,NR4A3
Pubmed	25770130	The thymic cortical epithelium determines the TCR repertoire of IL-17-producing ??T cells.	Pubmed	0.001231	1	0.03081	0.3563	3	17	KRT5,KRT8,CD4
Pubmed	28288836	Temporal profiling of photoreceptor lineage gene expression during murine retinal development.	Pubmed	0.001231	1	0.03081	0.3563	3	17	SALL3,NR2E3,RCVRN
Pubmed	18799149	The tumor necrosis factor family receptors RANK and CD40 cooperatively establish the thymic medullary microenvironment and self-tolerance.	Pubmed	0.001231	1	0.03081	0.3563	3	17	APCS,KRT5,KRT8
Pubmed	15329828	A digenic cause of cleft lip in A-strain mice and definition of candidate genes for the two loci.	Pubmed	0.001231	1	0.03081	0.3563	3	17	ADCY2,ZNF502,ADAMTS16
Pubmed	19193342	Multiple genetic factors in olanzapine-induced weight gain in schizophrenia patients: a cohort study.	Pubmed	0.001231	1	0.03081	0.3563	3	17	GNB3,DRD2,TNFRSF1A
Pubmed	20861386	RNG105 deficiency impairs the dendritic localization of mRNAs for Na+/K+ ATPase subunit isoforms and leads to the degeneration of neuronal networks.	Pubmed	0.001231	1	0.03081	0.3563	3	17	FXYD1,FXYD6,FXYD5
Pubmed	12702649	Abnormal epidermal differentiation and impaired epithelial-mesenchymal tissue interactions in mice lacking the retinoblastoma relatives p107 and p130.	Pubmed	0.001231	1	0.03081	0.3563	3	17	NOG,CTNNB1,KRT5
Pubmed	18927546	Lp(a) and risk of recurrent cardiac events in obese postinfarction patients.	Pubmed	0.001231	1	0.03081	0.3563	3	17	PON1,APOA1,APOE
Pubmed	15857914	Dissecting Wnt/beta-catenin signaling during gastrulation using RNA interference in mouse embryos.	Pubmed	0.001231	1	0.03081	0.3563	3	17	PREX2,CTNNB1,SKAP2
Pubmed	19234195	Stabilized beta-catenin in thymic epithelial cells blocks thymus development and function.	Pubmed	0.001231	1	0.03081	0.3563	3	17	CTNNB1,KRT5,KRT8
Pubmed	22005931	Genome-wide association analysis of age-at-onset in Alzheimer's disease.	Pubmed	0.001231	1	0.03081	0.3563	3	17	TOMM40,APOC1,APOE
Pubmed	28009292	TGF-? Signaling in Dopaminergic Neurons Regulates Dendritic Growth, Excitatory-Inhibitory Synaptic Balance, and Reversal Learning.	Pubmed	0.001231	1	0.03081	0.3563	3	17	AIF1,SLC6A3,NPY
Pubmed	23535732	Identification of 23 new prostate cancer susceptibility loci using the iCOGS custom genotyping array.	Pubmed	0.001234	1	0.03081	0.3563	9	202	ADAR,SHC1,FLAD1,SALL3,CYP21A2,C4A,ZBTB7B,TNXB,PBXIP1
Pubmed	21963094	Global identification of modular cullin-RING ligase substrates.	Pubmed	0.001235	1	0.03081	0.3563	8	163	CHD4,AGO3,CHCHD6,CSNK2A1,EIF3H,DAP3,GRWD1,UBE2C
Pubmed	20634891	Maternal genes and facial clefts in offspring: a comprehensive search for genetic associations in two population-based cleft studies from Scandinavia.	Pubmed	0.001249	1	0.03081	0.3563	12	331	EPHB2,TWIST1,FZD7,PON1,APOA1,APOC2,XRCC1,APOE,ARNT,CTNNB1,SALL3,PVR
Pubmed	23752268	The functional interactome landscape of the human histone deacetylase family.	Pubmed	0.001268	1	0.03081	0.3563	11	287	RCC1,CHD4,ADAR,CSNK2A1,CSNK2B,ZNF516,ZFR,HDAC9,RBM12B,NOP2,THRAP3
Pubmed	11572484	Prediction of the coding sequences of unidentified human genes. XXI. The complete sequences of 60 new cDNA clones from brain which code for large proteins.	Pubmed	0.00127	1	0.03081	0.3563	5	63	LMTK3,KLHL32,TMEM132B,LENG8,PLEKHG4B
Pubmed	21182205	Identification of proteins associated with ligand-activated estrogen receptor ? in human breast cancer cell nuclei by tandem affinity purification and nano LC-MS/MS.	Pubmed	0.001307	1	0.03081	0.3563	10	245	RPS9,U2AF2,CHD4,PLEC,GAPDH,NOP2,THRAP3,MYH14,GNB4,RPL18
Pubmed	25332235	Substrate trapping proteomics reveals targets of the ?TrCP2/FBXW11 ubiquitin ligase.	Pubmed	0.001328	1	0.03081	0.3563	7	128	PLEC,DEPTOR,FLCN,CTNNB1,MTSS1,COPS7A,DAP3
Pubmed	17626619	An analysis of expression patterns of genes encoding proteins with catalytic activities.	Pubmed	0.001364	1	0.03081	0.3563	5	64	PKLR,GAPDH,GAPDHS,CA2,TPI1
Pubmed	25859222	Quantitative trait loci affecting the 3D skull shape and size in mouse and prioritization of candidate genes in-silico.	Pubmed	0.001373	1	0.03081	0.3563	4	38	ASXL1,GDF6,ARID1A,THRAP3
Pubmed	19058789	A common variant in DRD3 receptor is associated with autism spectrum disorder.	Pubmed	0.001389	1	0.03081	0.3563	7	129	CHRNA7,CNR2,SLC6A3,MTF1,COBL,NPY,DRD2
Pubmed	20568250	Common single nucleotide polymorphisms in immunoregulatory genes and multiple myeloma risk among women in Connecticut.	Pubmed	0.0014	1	0.03081	0.3563	6	95	RPS19,IL6R,TNFRSF25,CD4,CD27,TNFRSF1A
Pubmed	17567994	Prominent use of distal 5' transcription start sites and discovery of a large number of additional exons in ENCODE regions.	Pubmed	0.001462	1	0.03081	0.3563	5	65	LENG8,CGN,PIP5K1A,TMC4,GTPBP10
Pubmed	19143821	Association of MHC SNP genotype with susceptibility to type 1 diabetes: a modified survival approach.	Pubmed	0.001463	1	0.03081	0.3563	3	18	MSH5,PRRT1,TNXB
Pubmed	24386095	A genome wide association study identifies common variants associated with lipid levels in the Chinese population.	Pubmed	0.001463	1	0.03081	0.3563	3	18	TOMM40,APOA1,APOA4
Pubmed	28589954	WNT10A mutation causes ectodermal dysplasia by impairing progenitor cell proliferation and KLF4-mediated differentiation.	Pubmed	0.001463	1	0.03081	0.3563	3	18	FABP5,CTNNB1,KRT84
Pubmed	10049364	Inactivation of the winged helix transcription factor HNF3alpha affects glucose homeostasis and islet glucagon gene expression in vivo.	Pubmed	0.001463	1	0.03081	0.3563	3	18	PKLR,APOA1,APOC2
Pubmed	23585552	Genome-wide association study identifies genetic risk underlying primary rhegmatogenous retinal detachment.	Pubmed	0.001463	1	0.03081	0.3563	3	18	ADAMTSL4,CERS2,ARNT
Pubmed	19116923	Genetic association of the major histocompatibility complex with rheumatoid arthritis implicates two non-DRB1 loci.	Pubmed	0.001463	1	0.03081	0.3563	3	18	CYP21A2,PRRT1,TNXB
Pubmed	23726366	Genome-wide characterization of shared and distinct genetic components that influence blood lipid levels in ethnically diverse human populations.	Pubmed	0.001463	1	0.03081	0.3563	3	18	TOMM40,APOC1,APOE
Pubmed	24130170	SH3RF2 functions as an oncogene by mediating PAK4 protein stability.	Pubmed	0.001463	1	0.03081	0.3563	3	18	U2AF2,DDX6,TNFRSF1A
Pubmed	22072979	Foxn1 regulates lineage progression in cortical and medullary thymic epithelial cells but is dispensable for medullary sublineage divergence.	Pubmed	0.001463	1	0.03081	0.3563	3	18	KRT5,KRT8,CD4
Pubmed	21068128	Mutation analysis of 18 nephronophthisis associated ciliopathy disease genes using a DNA pooling and next generation sequencing strategy.	Pubmed	0.001463	1	0.03081	0.3563	3	18	TMEM67,CC2D2A,INVS
Pubmed	15590741	Epithelial hedgehog signals pattern the intestinal crypt-villus axis.	Pubmed	0.001463	1	0.03081	0.3563	3	18	EPHB2,NOG,CTNNB1
Pubmed	23092984	Genome-wide association of mood-incongruent psychotic bipolar disorder.	Pubmed	0.001463	1	0.03081	0.3563	3	18	MYOM3,SNAP91,PRSS35
Pubmed	26934381	Epithelial Wnt/?catenin signalling is essential for epididymal coiling.	Pubmed	0.001463	1	0.03081	0.3563	3	18	MMP9,CTNNB1,KRT8
Pubmed	11002334	Transcriptional regulation of liver development.	Pubmed	0.001463	1	0.03081	0.3563	3	18	APOA1,APOC2,TNFRSF1A
Pubmed	20467437	Direct interaction between hnRNP-M and CDC5L/PLRG1 proteins affects alternative splice site choice.	Pubmed	0.001474	1	0.03081	0.3563	17	581	U2AF2,CHD4,ARID1A,TTK,RXRB,PLEC,SHC1,GAPDH,DDX6,NCAPD2,UBE2S,GNB3,THRAP3,KIF2C,RAD21,LENG9,ARHGEF1
Pubmed	28031328	Interactome Analysis Reveals a Novel Role for RAD6 in the Regulation of Proteasome Activity and Localization in Response to DNA Damage.	Pubmed	0.001518	1	0.03081	0.3563	7	131	RPS9,U2AF2,ADAR,TOMM40,CSNK2A1,THRAP3,KRT5
Pubmed	16987237	Reduced expression of neuropeptide genes in a genome-wide screen of a secretion-deficient mouse.	Pubmed	0.001565	1	0.03081	0.3563	5	66	COL4A2,GAPDH,NPY,CACNA1A,GRIK2
Pubmed	28178653	Derlin-1 overexpression confers poor prognosis in muscle invasive bladder cancer and contributes to chemoresistance and invasion through PI3K/AKT and ERK/MMP signaling.	Pubmed	0.001585	1	0.03081	0.3563	2	5	MMP9,DERL1
Pubmed	19038788	Cell lineage mapping of taste bud cells and keratinocytes in the mouse tongue and soft palate.	Pubmed	0.001585	1	0.03081	0.3563	2	5	KRT5,KRT8
Pubmed	19286843	Polymorphisms of DNA damage response genes in radiation-related and sporadic papillary thyroid carcinoma.	Pubmed	0.001585	1	0.03081	0.3563	2	5	XRCC1,MTF1
Pubmed	12426564	NKG2D recruits two distinct adapters to trigger NK cell activation and costimulation.	Pubmed	0.001585	1	0.03081	0.3563	2	5	TYROBP,HCST
Pubmed	21968112	ApoE regulates hematopoietic stem cell proliferation, monocytosis, and monocyte accumulation in atherosclerotic lesions in mice.	Pubmed	0.001585	1	0.03081	0.3563	2	5	APOA1,APOE
Pubmed	20404099	Biphasic Aire expression in early embryos and in medullary thymic epithelial cells before end-stage terminal differentiation.	Pubmed	0.001585	1	0.03081	0.3563	2	5	KRT5,CD4
Pubmed	21852538	Calsenilin regulates presenilin 1/?-secretase-mediated N-cadherin ?-cleavage and ?-catenin signaling.	Pubmed	0.001585	1	0.03081	0.3563	2	5	CTNNB1,PSENEN
Pubmed	26668325	The Evolutionarily Conserved Tre2/Bub2/Cdc16 (TBC), Lysin Motif (LysM), Domain Catalytic (TLDc) Domain Is Neuroprotective against Oxidative Stress.	Pubmed	0.001585	1	0.03081	0.3563	2	5	OXR1,NCOA7
Pubmed	16443932	Apolipoprotein A-I activates Cdc42 signaling through the ABCA1 transporter.	Pubmed	0.001585	1	0.03081	0.3563	2	5	APOA1,APOE
Pubmed	24706750	Toll-like receptor-mediated down-regulation of the deubiquitinase cylindromatosis (CYLD) protects macrophages from necroptosis in wild-derived mice.	Pubmed	0.001585	1	0.03081	0.3563	2	5	CYLD,TNFRSF1A
Pubmed	18342007	CD4-CD8 lineage commitment is regulated by a silencer element at the ThPOK transcription-factor locus.	Pubmed	0.001585	1	0.03081	0.3563	2	5	ZBTB7B,CD4
Pubmed	3034587	Orientation and molecular map position of the complement genes in the mouse MHC.	Pubmed	0.001585	1	0.03081	0.3563	2	5	CYP21A2,C4A
Pubmed	11283268	Discoidin domain receptor 1 tyrosine kinase has an essential role in mammary gland development.	Pubmed	0.001585	1	0.03081	0.3563	2	5	DDR1,LALBA
Pubmed	12887926	S phase activation of the histone H2B promoter by OCA-S, a coactivator complex that contains GAPDH as a key component.	Pubmed	0.001585	1	0.03081	0.3563	2	5	POU2F2,GAPDH
Pubmed	21627779	The membrane-spanning 4-domains, subfamily A (MS4A) gene cluster contains a common variant associated with Alzheimer's disease.	Pubmed	0.001585	1	0.03081	0.3563	2	5	TOMM40,APOE
Pubmed	24770881	ABCC9 gene polymorphism is associated with hippocampal sclerosis of aging pathology.	Pubmed	0.001585	1	0.03081	0.3563	2	5	TOMM40,APOE
Pubmed	21860087	Cerebrospinal fluid matrix metalloproteinases and tissue inhibitor of metalloproteinases in combination with subcortical and cortical biomarkers in vascular dementia and Alzheimer's disease.	Pubmed	0.001585	1	0.03081	0.3563	2	5	MBP,MMP9
Pubmed	11952809	Relationship of genetic variation in genes encoding apolipoprotein A-IV, scavenger receptor BI, HMG-CoA reductase, CETP and apolipoprotein E with cholesterol metabolism and the response to plant stanol ester consumption.	Pubmed	0.001585	1	0.03081	0.3563	2	5	APOA4,APOE
Pubmed	28506999	Btbd7 is essential for region-specific epithelial cell dynamics and branching morphogenesis in vivo.	Pubmed	0.001585	1	0.03081	0.3563	2	5	EMG1,GAPDH
Pubmed	27566940	The Transcription Factor AP4 Mediates Resolution of Chronic Viral Infection through Amplification of Germinal Center B Cell Responses.	Pubmed	0.001585	1	0.03081	0.3563	2	5	AICDA,CD79A
Pubmed	12587534	Gene expression of adhesion molecules and matrix metalloproteinases in endometriosis.	Pubmed	0.001585	1	0.03081	0.3563	2	5	MMP9,CTNNB1
Pubmed	21486957	Protein kinase CK2 regulates the formation and clearance of aggresomes in response to stress.	Pubmed	0.001585	1	0.03081	0.3563	2	5	CSNK2A1,CSNK2B
Pubmed	16895915	Nuclear export of S6K1 II is regulated by protein kinase CK2 phosphorylation at Ser-17.	Pubmed	0.001585	1	0.03081	0.3563	2	5	CSNK2A1,CSNK2B
Pubmed	25900259	Periostin of human periodontal ligament fibroblasts promotes migration of human mesenchymal stem cell through the ?v?3 integrin/FAK/PI3K/Akt pathway.	Pubmed	0.001585	1	0.03081	0.3563	2	5	GAPDH,PTK2
Pubmed	23811311	Subunit composition and kinetics of the Renshaw cell heteromeric nicotinic receptors.	Pubmed	0.001585	1	0.03081	0.3563	2	5	CHRNA7,CHRNB2
Pubmed	19176223	The p21 codon 31*C- and DRD2 codon 313*T-related genotypes/alleles, but not XRCC1 codon 399, hOGG1 codon 326, and DRD1-48 polymorphisms, are correlated with the presence of leiomyoma.	Pubmed	0.001585	1	0.03081	0.3563	2	5	XRCC1,DRD2
Pubmed	29526553	ATXN1-CIC Complex Is the Primary Driver of Cerebellar Pathology in Spinocerebellar Ataxia Type 1 through a Gain-of-Function Mechanism.	Pubmed	0.001585	1	0.03081	0.3563	2	5	ATXN1,CIC
Pubmed	19734903	Genome-wide association study identifies variants at CLU and CR1 associated with Alzheimer's disease.	Pubmed	0.001585	1	0.03081	0.3563	2	5	TOMM40,APOE
Pubmed	21691068	GABARAPL1 negatively regulates Wnt/?-catenin signaling by mediating Dvl2 degradation through the autophagy pathway.	Pubmed	0.001585	1	0.03081	0.3563	2	5	GABARAPL1,CTNNB1
Pubmed	21435585	RUNX transcription factor-mediated association of Cd4 and Cd8 enables coordinate gene regulation.	Pubmed	0.001585	1	0.03081	0.3563	2	5	ZBTB7B,CD4
Pubmed	11702052	Potential genetic markers of sporadic Alzheimer's dementia.	Pubmed	0.001585	1	0.03081	0.3563	2	5	APOC1,APOE
Pubmed	19672307	The Wnt receptor, Lrp5, is expressed by mouse mammary stem cells and is required to maintain the basal lineage.	Pubmed	0.001585	1	0.03081	0.3563	2	5	KRT5,KRT8
Pubmed	19543507	Non-association between polymorphisms of the frizzled receptor genes and bone mineral density in postmenopausal Korean women.	Pubmed	0.001585	1	0.03081	0.3563	2	5	FZD6,FZD7
Pubmed	3796661	Linear dose-response relationship of erythrocyte enzyme-activity mutations in offspring of ethylnitrosourea-treated mice.	Pubmed	0.001585	1	0.03081	0.3563	2	5	GAPDH,TPI1
Pubmed	26245758	Deletion of angiotensin-converting enzyme 2 exacerbates renal inflammation and injury in apolipoprotein E-deficient mice through modulation of the nephrin and TNF-alpha-TNFRSF1A signaling.	Pubmed	0.001585	1	0.03081	0.3563	2	5	APOE,TNFRSF1A
Pubmed	21960637	GRK2-dependent S1PR1 desensitization is required for lymphocytes to overcome their attraction to blood.	Pubmed	0.001585	1	0.03081	0.3563	2	5	SPHK2,CD79A
Pubmed	23720416	Characterization of enhancers active in the mouse embryonic cerebral cortex suggests Sox/Pou cis-regulatory logics and heterogeneity of cortical progenitors.	Pubmed	0.001585	1	0.03081	0.3563	2	5	POU3F2,SALL3
Pubmed	24747438	Lipidation of the LC3/GABARAP family of autophagy proteins relies on a membrane-curvature-sensing domain in Atg3.	Pubmed	0.001585	1	0.03081	0.3563	2	5	GABARAP,GABARAPL1
Pubmed	28439004	Endocannabinoid system acts as a regulator of immune homeostasis in the gut.	Pubmed	0.001585	1	0.03081	0.3563	2	5	CNR2,CX3CR1
Pubmed	12559634	TNF, TNF receptor type 1, and allograft inflammatory factor-1 gene polymorphisms in Japanese patients with type 1 diabetes.	Pubmed	0.001585	1	0.03081	0.3563	2	5	AIF1,TNFRSF1A
Pubmed	17360478	Steroid receptor coactivator 3 is a coactivator for myocardin, the regulator of smooth muscle transcription and differentiation.	Pubmed	0.001585	1	0.03081	0.3563	2	5	MRTFA,MYOCD
Pubmed	28273073	SRC-2-mediated coactivation of anti-tumorigenic target genes suppresses MYC-induced liver cancer.	Pubmed	0.001585	1	0.03081	0.3563	2	5	CADM4,NR0B2
Pubmed	26604141	Deficiency of the zinc finger protein ZFP106 causes motor and sensory neurodegeneration.	Pubmed	0.001585	1	0.03081	0.3563	2	5	MBP,AIF1
Pubmed	12663058	Differential nicotinic acetylcholine receptor subunit expression in the human hippocampus.	Pubmed	0.001585	1	0.03081	0.3563	2	5	CHRNA7,CHRNB2
Pubmed	19845893	Plasma concentrations of TNF-alpha and its soluble receptors sTNFR1 and sTNFR2 in patients with coronary artery disease.	Pubmed	0.001585	1	0.03081	0.3563	2	5	AMPD1,TNFRSF1A
Pubmed	18805411	Dynamic regulation of retinoic acid-binding proteins in developing, adult and neoplastic skin reveals roles for beta-catenin and Notch signalling.	Pubmed	0.001585	1	0.03081	0.3563	2	5	FABP5,CRABP2
Pubmed	25613532	Clinically significant novel biomarkers for prediction of first ever myocardial infarction: the Tromsø Study.	Pubmed	0.001585	1	0.03081	0.3563	2	5	MMP9,APOA1
Pubmed	22918941	Actin-capping protein promotes microtubule stability by antagonizing the actin activity of mDia1.	Pubmed	0.001585	1	0.03081	0.3563	2	5	GAPDH,PTK2
Pubmed	17440951	Gene-lifecourse interaction for alcohol consumption in adolescence and young adulthood: five monoamine genes.	Pubmed	0.001585	1	0.03081	0.3563	2	5	SLC6A3,DRD2
Pubmed	21085684	Phospholipase D family member 4, a transmembrane glycoprotein with no phospholipase D activity, expression in spleen and early postnatal microglia.	Pubmed	0.001585	1	0.03081	0.3563	2	5	MBP,AIF1
Pubmed	20966214	Fate mapping analysis reveals that adult microglia derive from primitive macrophages.	Pubmed	0.001585	1	0.03081	0.3563	2	5	AIF1,CX3CR1
Pubmed	24531553	Extracellular caspase-6 drives murine inflammatory pain via microglial TNF-? secretion.	Pubmed	0.001585	1	0.03081	0.3563	2	5	CX3CR1,TNFRSF1A
Pubmed	18823527	A genome-wide association study for late-onset Alzheimer's disease using DNA pooling.	Pubmed	0.001585	1	0.03081	0.3563	2	5	TOMM40,APOE
Pubmed	2499515	Ath-2, a second gene determining atherosclerosis susceptibility and high density lipoprotein levels in mice.	Pubmed	0.001585	1	0.03081	0.3563	2	5	APOA1,APOE
Pubmed	10783152	Discoidin domain receptor 1 (DDR1) signaling in PC12 cells: activation of juxtamembrane domains in PDGFR/DDR/TrkA chimeric receptors.	Pubmed	0.001585	1	0.03081	0.3563	2	5	SHC1,DDR1
Pubmed	23076118	Developmental expression patterns of kainate receptors in the mouse spinal cord.	Pubmed	0.001585	1	0.03081	0.3563	2	5	GRIK2,GRIK3
Pubmed	18505825	Sox12 deletion in the mouse reveals nonreciprocal redundancy with the related Sox4 and Sox11 transcription factors.	Pubmed	0.001585	1	0.03081	0.3563	2	5	POU3F2,SOX4
Pubmed	16766085	GABA(A) receptor beta isoform protein expression in human alcoholic brain: interaction with genotype.	Pubmed	0.001585	1	0.03081	0.3563	2	5	APOE,DRD2
Pubmed	16790075	Keratin 6 is not essential for mammary gland development.	Pubmed	0.001585	1	0.03081	0.3563	2	5	KRT5,KRT8
Pubmed	16478678	Apolipoprotein CI causes hypertriglyceridemia independent of the very-low-density lipoprotein receptor and apolipoprotein CIII in mice.	Pubmed	0.001585	1	0.03081	0.3563	2	5	APOC1,APOE
Pubmed	8245722	Identification of disulfide-linked apolipoprotein species in human lipoproteins.	Pubmed	0.001585	1	0.03081	0.3563	2	5	APOC2,APOE
Pubmed	10871871	The human and mouse MHC class III region: a parade of 21 genes at the centromeric segment.	Pubmed	0.001585	1	0.03081	0.3563	2	5	CYP21A2,TNXB
Pubmed	11296258	Functional disorders of the sympathetic nervous system in mice lacking the alpha 1B subunit (Cav 2.2) of N-type calcium channels.	Pubmed	0.001585	1	0.03081	0.3563	2	5	CACNA1A,CACNA1B
Pubmed	15365099	Differential requirements for Vav proteins in DAP10- and ITAM-mediated NK cell cytotoxicity.	Pubmed	0.001585	1	0.03081	0.3563	2	5	TYROBP,HCST
Pubmed	15572674	Interaction and functional cooperation between the LIM protein FHL2, CBP/p300, and beta-catenin.	Pubmed	0.001585	1	0.03081	0.3563	2	5	CTNNB1,CITED4
Pubmed	15788413	The extracellular matrix protein MAGP-2 interacts with Jagged1 and induces its shedding from the cell surface.	Pubmed	0.001585	1	0.03081	0.3563	2	5	MFAP2,MFAP5
Pubmed	23844046	Are C-reactive protein associated genetic variants associated with serum levels and retinal markers of microvascular pathology in Asian populations from Singapore?	Pubmed	0.001585	1	0.03081	0.3563	2	5	TOMM40,APOE
Pubmed	8586432	The murine lymphotoxin-beta receptor cDNA: isolation by the signal sequence trap and chromosomal mapping.	Pubmed	0.001585	1	0.03081	0.3563	2	5	TNFRSF1A,TPI1
Pubmed	18404133	Some ADHD polymorphisms (in genes DAT1, DRD2, DRD3, DBH, 5-HTT) in case-control study of 100 subjects 6-10 age.	Pubmed	0.001585	1	0.03081	0.3563	2	5	SLC6A3,DRD2
Pubmed	11684708	Keratin attenuates tumor necrosis factor-induced cytotoxicity through association with TRADD.	Pubmed	0.001585	1	0.03081	0.3563	2	5	KRT8,TNFRSF1A
Pubmed	22971575	Focal adhesion kinase is required for ?-catenin-induced mobilization of epidermal stem cells.	Pubmed	0.001585	1	0.03081	0.3563	2	5	CTNNB1,PTK2
Pubmed	15922075	Performance of alpha7 nicotinic receptor null mutants is impaired in appetitive learning measured in a signaled nose poke task.	Pubmed	0.001585	1	0.03081	0.3563	2	5	CHRNA7,CHRNB2
Pubmed	19820702	UBE2S elongates ubiquitin chains on APC/C substrates to promote mitotic exit.	Pubmed	0.001585	1	0.03081	0.3563	2	5	UBE2S,UBE2C
Pubmed	22362755	Zinc-induced Dnmt1 expression involves antagonism between MTF-1 and nuclear receptor SHP.	Pubmed	0.001585	1	0.03081	0.3563	2	5	NR0B2,MTF1
Pubmed	15128777	IL-4 confers NK stimulatory capacity to murine dendritic cells: a signaling pathway involving KARAP/DAP12-triggering receptor expressed on myeloid cell 2 molecules.	Pubmed	0.001585	1	0.03081	0.3563	2	5	TYROBP,CD86
Pubmed	24468470	Genetic susceptibility to accelerated cognitive decline in the US Health and Retirement Study.	Pubmed	0.001585	1	0.03081	0.3563	2	5	TOMM40,APOE
Pubmed	15878887	Pathways participating in activation of mouse uterine natural killer cells during pregnancy.	Pubmed	0.001585	1	0.03081	0.3563	2	5	TYROBP,HCST
Pubmed	11940573	Interactions between protein kinase CK2 and Pin1. Evidence for phosphorylation-dependent interactions.	Pubmed	0.001585	1	0.03081	0.3563	2	5	CSNK2A1,CSNK2B
Pubmed	17998437	Candidate single-nucleotide polymorphisms from a genomewide association study of Alzheimer disease.	Pubmed	0.001585	1	0.03081	0.3563	2	5	APOC1,APOE
Pubmed	23233200	During embryogenesis, esrp1 expression is restricted to a subset of epithelial cells and is associated with splicing of a number of developmentally important genes.	Pubmed	0.001585	1	0.03081	0.3563	2	5	OSBPL3,ESRP1
Pubmed	27012200	R-spondin 2 facilitates differentiation of proliferating chondrocytes into hypertrophic chondrocytes by enhancing Wnt/?-catenin signaling in endochondral ossification.	Pubmed	0.001585	1	0.03081	0.3563	2	5	RSPO2,CTNNB1
Pubmed	11230134	The transcription factors MTF-1 and USF1 cooperate to regulate mouse metallothionein-I expression in response to the essential metal zinc in visceral endoderm cells during early development.	Pubmed	0.001585	1	0.03081	0.3563	2	5	USF2,MTF1
Pubmed	28650342	Inflammatory Ly6Chi monocytes and their conversion to M2 macrophages drive atherosclerosis regression.	Pubmed	0.001585	1	0.03081	0.3563	2	5	APOE,CX3CR1
Pubmed	25948261	Changes in Nicotinic Neurotransmission during Enteric Nervous System Development.	Pubmed	0.001585	1	0.03081	0.3563	2	5	CHRNA7,CHRNB2
Pubmed	9466455	Expression and heteromeric interactions of non-N-methyl-D-aspartate glutamate receptor subunits in the developing and adult cerebellum.	Pubmed	0.001585	1	0.03081	0.3563	2	5	GRIK2,GRIK3
Pubmed	12827191	Alpha-neurexins couple Ca2+ channels to synaptic vesicle exocytosis.	Pubmed	0.001585	1	0.03081	0.3563	2	5	CACNA1A,CACNA1B
Pubmed	24650562	Lp(a)/apo(a) modulate MMP-9 activation and neutrophil cytokines in vivo in inflammation to regulate leukocyte recruitment.	Pubmed	0.001585	1	0.03081	0.3563	2	5	MMP9,APOA1
Pubmed	25788872	Non-cell autonomous and non-catalytic activities of ATX in the developing brain.	Pubmed	0.001585	1	0.03081	0.3563	2	5	CTNNB1,PTK2
Pubmed	182536	Effect of serum and C-apoproteins from very low density lipoproteins on human postheparin plasma hepatic lipase.	Pubmed	0.001585	1	0.03081	0.3563	2	5	APOC1,APOC2
Pubmed	16787652	Identification of a cardiac isoform of the murine calcium channel alpha1C (Cav1.2-a) subunit and its preferential binding with the beta2 subunit.	Pubmed	0.001585	1	0.03081	0.3563	2	5	CACNA1A,CACNA1B
Pubmed	18538149	Racial disparity in maternal-fetal genetic epistasis in spontaneous preterm birth.	Pubmed	0.001585	1	0.03081	0.3563	2	5	IL6R,TNFRSF1A
Pubmed	17671965	Polymorphisms TaqI A of the DRD2, BalI of the DRD3, exon III repeat of the DRD4, and 3' UTR VNTR of the DAT: association with childhood ADHD in male African-Caribbean cocaine dependents?	Pubmed	0.001585	1	0.03081	0.3563	2	5	SLC6A3,DRD2
Pubmed	12765698	Role and regulation of TRP channels in neutrophil granulocytes.	Pubmed	0.001585	1	0.03081	0.3563	2	5	TRPV6,TRPV5
Pubmed	25391383	Genetic variation in imprinted genes is associated with risk of late-onset Alzheimer's disease.	Pubmed	0.001585	1	0.03081	0.3563	2	5	GPR1,GRB10
Pubmed	8825650	Chromosomal localization of the human genes for alpha 1A, alpha 1B, and alpha 1E voltage-dependent Ca2+ channel subunits.	Pubmed	0.001585	1	0.03081	0.3563	2	5	CACNA1A,CACNA1B
Pubmed	24233434	The distinct roles of anion transporters Slc26a3 (DRA) and Slc26a6 (PAT-1) in fluid and electrolyte absorption in the murine small intestine.	Pubmed	0.001585	1	0.03081	0.3563	2	5	SLC26A6,CA2
Pubmed	19918778	Spatial (Tbata) expression in mature medullary thymic epithelial cells.	Pubmed	0.001585	1	0.03081	0.3563	2	5	KRT5,KRT8
Pubmed	19592636	Casein kinase 2beta as a novel enhancer of activin-like receptor-1 signaling.	Pubmed	0.001585	1	0.03081	0.3563	2	5	CSNK2A1,CSNK2B
Pubmed	15451373	Antinociceptive effect of different types of calcium channel inhibitors and the distribution of various calcium channel alpha 1 subunits in the dorsal horn of spinal cord in mice.	Pubmed	0.001585	1	0.03081	0.3563	2	5	CACNA1A,CACNA1B
Pubmed	28202515	Systematic In Vivo Inactivation of Chromatin-Regulating Enzymes Identifies Setd2 as a Potent Tumor Suppressor in Lung Adenocarcinoma.	Pubmed	0.001585	1	0.03081	0.3563	2	5	ARID1A,SETD2
Pubmed	19074352	A null mutation in human APOC3 confers a favorable plasma lipid profile and apparent cardioprotection.	Pubmed	0.001585	1	0.03081	0.3563	2	5	APOA1,APOA4
Pubmed	27560372	D186/D190 is an allele-dependent determinant of HIV-1 Nef function.	Pubmed	0.001585	1	0.03081	0.3563	2	5	CTNNB1,CD4
Pubmed	24931836	C9orf72 and UNC13A are shared risk loci for amyotrophic lateral sclerosis and frontotemporal dementia: a genome-wide meta-analysis.	Pubmed	0.001585	1	0.03081	0.3563	2	5	NSMCE2,SQLE
Pubmed	26224839	Na, K-ATPase ?3 is a death target of Alzheimer patient amyloid-? assembly.	Pubmed	0.001585	1	0.03081	0.3563	2	5	EPHB2,CHRNA7
Pubmed	10561590	Identification of a CK2 phosphorylation site in mdm2.	Pubmed	0.001585	1	0.03081	0.3563	2	5	CSNK2A1,CSNK2B
Pubmed	19120482	DAP10- and DAP12-associated receptors in innate immunity.	Pubmed	0.001585	1	0.03081	0.3563	2	5	TYROBP,HCST
Pubmed	12901717	Eukaryotic translation-initiation factor eIF2beta binds to protein kinase CK2: effects on CK2alpha activity.	Pubmed	0.001585	1	0.03081	0.3563	2	5	CSNK2A1,CSNK2B
Pubmed	11123317	Role of two conserved cytoplasmic threonine residues (T410 and T412) in CD5 signaling.	Pubmed	0.001585	1	0.03081	0.3563	2	5	CSNK2A1,PRKCG
Pubmed	12223554	Kainate receptor subunits underlying presynaptic regulation of transmitter release in the dorsal horn.	Pubmed	0.001585	1	0.03081	0.3563	2	5	GRIK2,GRIK3
Pubmed	22407925	Calcium transport genes are differently regulated in maternal and fetal placenta in the knockout mice of calbindin-D(9k) and -D(28k).	Pubmed	0.001585	1	0.03081	0.3563	2	5	TRPV6,TRPV5
Pubmed	16865686	Characterization of a mouse strain expressing Cre recombinase from the 3' untranslated region of the dopamine transporter locus.	Pubmed	0.001585	1	0.03081	0.3563	2	5	SLC6A3,DRD2
Pubmed	22615920	LGR6 is a high affinity receptor of R-spondins and potentially functions as a tumor suppressor.	Pubmed	0.001585	1	0.03081	0.3563	2	5	RSPO2,RSPO1
Pubmed	21965288	?-catenin and Smad3 regulate the activity and stability of myocardin-related transcription factor during epithelial-myofibroblast transition.	Pubmed	0.001585	1	0.03081	0.3563	2	5	MRTFA,CTNNB1
Pubmed	23613527	Single-channel properties of ?3?4, ?3?4?5 and ?3?4?2 nicotinic acetylcholine receptors in mice lacking specific nicotinic acetylcholine receptor subunits.	Pubmed	0.001585	1	0.03081	0.3563	2	5	CHRNA7,CHRNB2
Pubmed	12068292	Generation of a complete thymic microenvironment by MTS24(+) thymic epithelial cells.	Pubmed	0.001585	1	0.03081	0.3563	2	5	KRT5,KRT8
Pubmed	15685547	Linkage to peroxisome proliferator-activated receptor-gamma in SAMP1/YitFc mice and in human Crohn's disease.	Pubmed	0.001585	1	0.03081	0.3563	2	5	CD4,TNFRSF1A
Pubmed	22848449	NEMO inhibits programmed necrosis in an NF?B-independent manner by restraining RIP1.	Pubmed	0.001585	1	0.03081	0.3563	2	5	CYLD,TNFRSF1A
Pubmed	20033274	Catechol-o-methyltransferase genotype and childhood trauma may interact to impact schizotypal personality traits.	Pubmed	0.001585	1	0.03081	0.3563	2	5	SLC6A3,DRD2
Pubmed	11768721	An association study of five genetic loci and left ventricular hypertrophy amongst Gulf Arabs.	Pubmed	0.001585	1	0.03081	0.3563	2	5	PON1,GNB3
Pubmed	10343159	An unequal crossover between the RCCX modules of the human MHC leading to the presence of a CYP21B gene and a tenascin TNXB/TNXA-RP2 recombinant between C4A and C4B genes in a patient with juvenile rheumatoid arthritis.	Pubmed	0.001585	1	0.03081	0.3563	2	5	CYP21A2,TNXB
Pubmed	18793656	Kainate receptors: pharmacology, function and therapeutic potential.	Pubmed	0.001585	1	0.03081	0.3563	2	5	GRIK2,GRIK3
Pubmed	20488209	The serotonin transporter gene polymorphism STin2 VNTR confers an increased risk of inconsistent response to triptans in migraine patients.	Pubmed	0.001585	1	0.03081	0.3563	2	5	GNB3,DRD2
Pubmed	21731611	HSPB1, HSPB6, HSPB7 and HSPB8 protect against RhoA GTPase-induced remodeling in tachypaced atrial myocytes.	Pubmed	0.001585	1	0.03081	0.3563	2	5	HSPB6,HSPB8
Pubmed	17586316	HIV accessory genes Vif and Vpu.	Pubmed	0.001585	1	0.03081	0.3563	2	5	CSNK2A1,CD4
Pubmed	16683015	SAGE2Splice: unmapped SAGE tags reveal novel splice junctions.	Pubmed	0.001585	1	0.03081	0.3563	2	5	ZDHHC18,ITGA1
Pubmed	2175917	Activation of erythropoietin receptors by Friend viral gp55 and by erythropoietin and down-modulation by the murine Fv-2r resistance gene.	Pubmed	0.001585	1	0.03081	0.3563	2	5	ME1,APOA1
Pubmed	23530063	MCJ/DnaJC15, an endogenous mitochondrial repressor of the respiratory chain that controls metabolic alterations.	Pubmed	0.001585	1	0.03081	0.3563	2	5	GAPDH,NDUFV1
Pubmed	27705788	Self-Antigen-Driven Thymic B Cell Class Switching Promotes T Cell Central Tolerance.	Pubmed	0.001585	1	0.03081	0.3563	2	5	AICDA,CD79A
Pubmed	11714803	Immunoreceptor tyrosine-based inhibitory motif of the IL-4 receptor associates with SH2-containing phosphatases and regulates IL-4-induced proliferation.	Pubmed	0.001585	1	0.03081	0.3563	2	5	SHC1,PTPN6
Pubmed	23185343	Dopamine D1, D2, D3 receptors, vesicular monoamine transporter type-2 (VMAT2) and dopamine transporter (DAT) densities in aged human brain.	Pubmed	0.001585	1	0.03081	0.3563	2	5	SLC6A3,DRD2
Pubmed	23580615	Phosphorylation of protein S by platelet kinases enhances its activated protein C cofactor activity.	Pubmed	0.001585	1	0.03081	0.3563	2	5	CSNK2A1,CSNK2B
Pubmed	11285235	Transcriptional repression and developmental functions of the atypical vertebrate GATA protein TRPS1.	Pubmed	0.001585	1	0.03081	0.3563	2	5	DEPTOR,SNTB1
Pubmed	8088838	Comparative mapping of the actin-binding protein 280 genes in human and mouse.	Pubmed	0.001585	1	0.03081	0.3563	2	5	CLCN1,TPI1
Pubmed	25317112	Epidemiological and genome-wide association study of gastritis or gastric ulcer in korean populations.	Pubmed	0.001585	1	0.03081	0.3563	2	5	MRPL13,MTBP
Pubmed	21485013	?4?2 nicotinic acetylcholine receptors in the early postnatal mouse superior cervical ganglion.	Pubmed	0.001585	1	0.03081	0.3563	2	5	CHRNA7,CHRNB2
Pubmed	15798203	Muscle-specific signaling mechanism that links actin dynamics to serum response factor.	Pubmed	0.001585	1	0.03081	0.3563	2	5	MRTFA,MYOCD
Pubmed	9148935	Focal adhesion kinase overexpression enhances ras-dependent integrin signaling to ERK2/mitogen-activated protein kinase through interactions with and activation of c-Src.	Pubmed	0.001585	1	0.03081	0.3563	2	5	SHC1,PTK2
Pubmed	25835425	Genetics of Vascular Dementia: Systematic Review and Meta-Analysis.	Pubmed	0.001585	1	0.03081	0.3563	2	5	PON1,APOE
Pubmed	9105675	The class III POU factor Brn-4 interacts with other class III POU factors and the heterogeneous nuclear ribonucleoprotein U.	Pubmed	0.001585	1	0.03081	0.3563	2	5	POU3F1,POU3F2
Pubmed	16977309	A PACS-1, GGA3 and CK2 complex regulates CI-MPR trafficking.	Pubmed	0.001585	1	0.03081	0.3563	2	5	CSNK2A1,CSNK2B
Pubmed	10094392	Interactions of protein kinase CK2beta subunit within the holoenzyme and with other proteins.	Pubmed	0.001585	1	0.03081	0.3563	2	5	CSNK2A1,CSNK2B
Pubmed	17727637	Characterization of the adaptor protein ARH expression in the brain and ARH molecular interactions.	Pubmed	0.001585	1	0.03081	0.3563	2	5	GABARAPL1,APLP1
Pubmed	20227366	Loss of the tumor suppressor CYLD enhances Wnt/beta-catenin signaling through K63-linked ubiquitination of Dvl.	Pubmed	0.001585	1	0.03081	0.3563	2	5	CTNNB1,CYLD
Pubmed	18560763	Ability of CK2beta to selectively regulate cellular protein kinases.	Pubmed	0.001585	1	0.03081	0.3563	2	5	CSNK2A1,CSNK2B
Pubmed	24823363	Citrullination of collagen II affects integrin-mediated cell adhesion in a receptor-specific manner.	Pubmed	0.001585	1	0.03081	0.3563	2	5	ITGA10,ITGA1
Pubmed	20805453	Molecular anatomy of breast cancer stroma and its prognostic value in estrogen receptor-positive and -negative cancers.	Pubmed	0.001585	1	0.03081	0.3563	2	5	COL4A2,ECM1
Pubmed	16462800	Natural regulatory T cells control the development of atherosclerosis in mice.	Pubmed	0.001585	1	0.03081	0.3563	2	5	APOE,CD86
Pubmed	24535599	Phosphorylation of Grb14 BPS domain by GSK-3 correlates with complex forming of Grb14 and insulin receptor.	Pubmed	0.001585	1	0.03081	0.3563	2	5	CSNK2A1,CSNK2B
Pubmed	21541287	Wnt4 enhances murine hematopoietic progenitor cell expansion through a planar cell polarity-like pathway.	Pubmed	0.001585	1	0.03081	0.3563	2	5	FZD6,CTNNB1
Pubmed	8662541	The POU factor Oct-6 and Schwann cell differentiation.	Pubmed	0.001585	1	0.03081	0.3563	2	5	MBP,POU3F1
Pubmed	20817736	Characterization of leukocyte mono-immunoglobulin-like receptor 7 (LMIR7)/CLM-3 as an activating receptor: its similarities to and differences from LMIR4/CLM-5.	Pubmed	0.001585	1	0.03081	0.3563	2	5	TYROBP,HCST
Pubmed	10903445	A HECT domain ubiquitin ligase closely related to the mammalian protein WWP1 is essential for Caenorhabditis elegans embryogenesis.	Pubmed	0.001585	1	0.03081	0.3563	2	5	POU3F2,GEM
Pubmed	16595606	Genetic linkage of hyperglycemia, body weight and serum amyloid-P in an intercross between C57BL/6 and C3H apolipoprotein E-deficient mice.	Pubmed	0.001585	1	0.03081	0.3563	2	5	APCS,APOE
Pubmed	10095079	Developmental changes in nicotinic receptor mRNAs and responses to nicotine in the suprachiasmatic nucleus and other brain regions.	Pubmed	0.001585	1	0.03081	0.3563	2	5	CHRNA7,CHRNB2
Pubmed	18414015	C-FLIP promotes the motility of cancer cells by activating FAK and ERK, and increasing MMP-9 expression.	Pubmed	0.001585	1	0.03081	0.3563	2	5	MMP9,PTK2
Pubmed	10753899	Functional expression of O-linked GlcNAc transferase. Domain structure and substrate specificity.	Pubmed	0.001585	1	0.03081	0.3563	2	5	CSNK2A1,CSNK2B
Pubmed	8798570	Ligand activation of ELK receptor tyrosine kinase promotes its association with Grb10 and Grb2 in vascular endothelial cells.	Pubmed	0.001585	1	0.03081	0.3563	2	5	EPHB2,GRB10
Pubmed	18358623	Molecular determinants of kainate receptor trafficking.	Pubmed	0.001585	1	0.03081	0.3563	2	5	GRIK2,GRIK3
Pubmed	19174477	Paternal deletion of Meg1/Grb10 DMR causes maternalization of the Meg1/Grb10 cluster in mouse proximal Chromosome 11 leading to severe pre- and postnatal growth retardation.	Pubmed	0.001585	1	0.03081	0.3563	2	5	COBL,GRB10
Pubmed	19641139	Lymphocytes in the development of lung inflammation: a role for regulatory CD4+ T cells in indirect pulmonary lung injury.	Pubmed	0.001585	1	0.03081	0.3563	2	5	IL16,CD4
Pubmed	9074935	Timing of the expression of enamel gene products during mouse tooth development.	Pubmed	0.001585	1	0.03081	0.3563	2	5	TUFT1,GAPDH
Pubmed	7774558	Multilocus genomic mapping with intracisternal A-particle proviral oligonucleotide probes hybridized to mouse DNA in dried agarose gels.	Pubmed	0.001585	1	0.03081	0.3563	2	5	ME1,CA2
Pubmed	1917889	Heterogeneity and tissue-specific expression of eukaryotic transcription factor S-II-related protein mRNA.	Pubmed	0.001585	1	0.03081	0.3563	2	5	APOA1,TCEA3
Pubmed	9593973	Development of laminar distributions of kainate receptors in the somatosensory cortex of mice.	Pubmed	0.001585	1	0.03081	0.3563	2	5	GRIK2,GRIK3
Pubmed	18549475	Genome wide SNP comparative analysis between EGFR and KRAS mutated NSCLC and characterization of two models of oncogenic cooperation in non-small cell lung carcinoma.	Pubmed	0.001585	1	0.03081	0.3563	2	5	TWIST1,HDAC9
Pubmed	12748192	Phosphorylation of threonine 10 on CKBBP1/SAG/ROC2/Rbx2 by protein kinase CKII promotes the degradation of IkappaBalpha and p27Kip1.	Pubmed	0.001585	1	0.03081	0.3563	2	5	CSNK2A1,CSNK2B
Pubmed	11937300	Genetic control of neutrophil superoxide production in diabetes-resistant ALR/Lt mice.	Pubmed	0.001585	1	0.03081	0.3563	2	5	ARNT,IL6R
Pubmed	10395542	Protein kinase C is differentially stimulated by Wnt and Frizzled homologs in a G-protein-dependent manner.	Pubmed	0.001585	1	0.03081	0.3563	2	5	FZD6,FZD7
Pubmed	17145811	Gene expression profiling separates chromophobe renal cell carcinoma from oncocytoma and identifies vesicular transport and cell junction proteins as differentially expressed genes.	Pubmed	0.001585	1	0.03081	0.3563	2	5	ESRP1,MAL2
Pubmed	16608402	Membership in genetic groups predicts Alzheimer disease.	Pubmed	0.001585	1	0.03081	0.3563	2	5	APOC1,APOE
Pubmed	18945672	Thymine DNA glycosylase represses myocardin-induced smooth muscle cell differentiation by competing with serum response factor for myocardin binding.	Pubmed	0.001585	1	0.03081	0.3563	2	5	MRTFA,MYOCD
Pubmed	15604093	Automated yeast two-hybrid screening for nuclear receptor-interacting proteins.	Pubmed	0.001656	1	0.03081	0.3563	7	133	RXRB,GABARAPL1,NR0B2,PNRC2,GAPDH,NPY,NR4A3
Pubmed	1628813	Rat gene mapping using PCR-analyzed microsatellites.	Pubmed	0.001666	1	0.03081	0.3563	4	40	MBP,PKLR,PRKCG,NPY
Pubmed	25275127	HIV-1 Nef and Vpu are functionally redundant broad-spectrum modulators of cell surface receptors, including tetraspanins.	Pubmed	0.001666	1	0.03081	0.3563	4	40	CD4,CD27,CD37,TNFRSF1A
Pubmed	21909109	Large-scale genome-wide association studies in East Asians identify new genetic loci influencing metabolic traits.	Pubmed	0.001666	1	0.03081	0.3563	4	40	TOMM40,APOA1,APOA4,APOE
Pubmed	29107558	ESRP1 Mutations Cause Hearing Loss due to Defects in Alternative Splicing that Disrupt Cochlear Development.	Pubmed	0.001666	1	0.03081	0.3563	4	40	PHACTR4,ESRP1,HEY1,EPB41
Pubmed	21068065	BMP signaling in the development of the mouse esophagus and forestomach.	Pubmed	0.001721	1	0.03081	0.3563	3	19	NOG,KRT5,KRT8
Pubmed	21623369	Regulation of angiogenesis by a non-canonical Wnt-Flt1 pathway in myeloid cells.	Pubmed	0.001721	1	0.03081	0.3563	3	19	FZD6,FZD7,AIF1
Pubmed	19390575	Lung cancer susceptibility model based on age, family history and genetic variants.	Pubmed	0.001721	1	0.03081	0.3563	3	19	SLC6A3,DRD2,TNFRSF1A
Pubmed	22666383	Abnormal Wnt and PI3Kinase signaling in the malformed intestine of lama5 deficient mice.	Pubmed	0.001721	1	0.03081	0.3563	3	19	APOA1,NPY,BCAM
Pubmed	15024025	Protein trafficking and anchoring complexes revealed by proteomic analysis of inward rectifier potassium channel (Kir2.x)-associated proteins.	Pubmed	0.001721	1	0.03081	0.3563	3	19	MPP6,SNTB1,LIN7B
Pubmed	22014525	ATXN1 protein family and CIC regulate extracellular matrix remodeling and lung alveolarization.	Pubmed	0.001721	1	0.03081	0.3563	3	19	ATXN1,MMP9,CIC
Pubmed	8432525	Fluorescence in situ hybridization mapping of human chromosome 19: cytogenetic band location of 540 cosmids and 70 genes or DNA markers.	Pubmed	0.001721	1	0.03081	0.3563	3	19	APOC1,XRCC1,PRKCG
Pubmed	26116666	Fat4/Dchs1 signaling between stromal and cap mesenchyme cells influences nephrogenesis and ureteric bud branching.	Pubmed	0.001721	1	0.03081	0.3563	3	19	CTNNB1,KRT8,ECM1
Pubmed	24097068	Discovery and refinement of loci associated with lipid levels.	Pubmed	0.001721	1	0.03081	0.3563	9	212	PLEC,NR0B2,CERS2,APOA1,APOC1,APOE,PIGV,SETD2,RRNAD1
Pubmed	19878569	Candidate genetic analysis of plasma high-density lipoprotein-cholesterol and severity of coronary atherosclerosis.	Pubmed	0.001828	1	0.03081	0.3563	4	41	PON1,APOA1,APOA4,APOC2
Pubmed	16452087	Comprehensive identification of phosphorylation sites in postsynaptic density preparations.	Pubmed	0.001834	1	0.03081	0.3563	9	214	MBP,RPS9,RPS19,LMTK3,RIMS2,FAM131B,THRAP3,CACNA1B,TPPP
Pubmed	19086053	Identification of new putative susceptibility genes for several psychiatric disorders by association analysis of regulatory and non-synonymous SNPs of 306 genes involved in neurotransmission and neurodevelopment.	Pubmed	0.001845	1	0.03081	0.3563	11	301	CHRNA7,CHRNB2,CNTN1,SLC6A3,SNAP91,GNB3,NPY,DRD2,GRIK2,GRIK3,ATP10A
Pubmed	17500595	Huntingtin interacting proteins are genetic modifiers of neurodegeneration.	Pubmed	0.001867	1	0.03081	0.3563	8	174	CNTN1,AMPD1,SETD2,CTNNB1,GAPDH,CMC1,DNALI1,EPB41
Pubmed	27173435	An organelle-specific protein landscape identifies novel diseases and molecular mechanisms.	Pubmed	0.001886	1	0.03081	0.3563	30	1321	RPS19,TUFT1,CGN,PLEC,MBOAT7,IFFO1,CHCHD6,PPP1R8,OSBPL3,CSNK2A1,CSNK2B,RBFOX1,CTNNB1,INVS,WDTC1,SOX4,EIF3E,GBA,SPIRE1,UHRF1BP1,DNALI1,SETDB1,ANKRD28,KIF2C,NAT14,SPAG9,FGFR1OP,UBE3D,GAN,RPA2
Pubmed	12693553	Prediction of the coding sequences of mouse homologues of KIAA gene: II. The complete nucleotide sequences of 400 mouse KIAA-homologous cDNAs identified by screening of terminal sequences of cDNA clones randomly sampled from size-fractionated libraries.	Pubmed	0.001888	1	0.03081	0.3563	13	395	ASXL1,KLHL32,ADCY2,PLXNA2,ZHX2,CYLD,CLSTN3,RAPGEF5,SETDB1,SV2B,NAV3,COBL,GRB10
Pubmed	9872452	Prediction of the coding sequences of unidentified human genes. XI. The complete sequences of 100 new cDNA clones from brain which code for large proteins in vitro.	Pubmed	0.001915	1	0.03081	0.3563	6	101	RIMS2,FAM131B,HDAC9,CLSTN3,SERINC2,SV2B
Pubmed	18519826	Molecular genetics of successful smoking cessation: convergent genome-wide association study results.	Pubmed	0.001915	1	0.03081	0.3563	6	101	TRIO,CHN2,ADCY2,CREB5,RBFOX1,GRIK2
Pubmed	16985003	Large-scale analysis of ion channel gene expression in the mouse heart during perinatal development.	Pubmed	0.001961	1	0.03081	0.3563	7	137	CLCN1,KCNK5,KCNJ5,KCNN4,CACNA1A,CACNA1B,CACNG6
Pubmed	15146195	Time-controlled transcardiac perfusion cross-linking for the study of protein interactions in complex tissues.	Pubmed	0.002	1	0.03081	0.3563	4	42	MBP,CNTN1,APLP1,APOE
Pubmed	22114352	A new role for the architecture of microvillar actin bundles in apical retention of membrane proteins.	Pubmed	0.002	1	0.03081	0.3563	4	42	CGN,PLEC,COBL,MYH14
Pubmed	17374359	Changes in gene-expression during development of the murine molar tooth germ.	Pubmed	0.002005	1	0.03081	0.3563	3	20	FZD6,APLP1,CTNNB1
Pubmed	21979435	Transforming growth factor-? signaling in myogenic cells regulates vascular morphogenesis, differentiation, and matrix synthesis.	Pubmed	0.002005	1	0.03081	0.3563	3	20	MFAP2,MYOCD,MFAP5
Pubmed	19587357	A systematic meta-analysis of genetic association studies for diabetic retinopathy.	Pubmed	0.002005	1	0.03081	0.3563	3	20	PON1,APOE,NPY
Pubmed	16751104	p38 and a p38-interacting protein are critical for downregulation of E-cadherin during mouse gastrulation.	Pubmed	0.002005	1	0.03081	0.3563	3	20	TWIST1,MAPK12,CTNNB1
Pubmed	27637333	Identification of Novel Nuclear Factor of Activated T Cell (NFAT)-associated Proteins in T Cells.	Pubmed	0.002151	1	0.03081	0.3563	8	178	ZNF384,CBX3,CHD4,ARID1A,XRCC1,UBE2S,KIF2C,RPA2
Pubmed	19773279	Association between genetic variants in VEGF, ERCC3 and occupational benzene haematotoxicity.	Pubmed	0.0022	1	0.03081	0.3563	10	263	AICDA,RPS19,CLCN1,P3H3,XRCC1,IL6R,TNFRSF25,CD4,CD27,TNFRSF1A
Pubmed	15741177	Tagging genes with cassette-exchange sites.	Pubmed	0.002206	1	0.03081	0.3563	11	308	PLEC,USF2,CDC42BPG,CCDC12,NSMCE2,PHACTR4,FLCN,MTSS1,PTK2,CDKAL1,NAV2
Pubmed	15146197	Transcriptome characterization elucidates signaling networks that control human ES cell growth and differentiation.	Pubmed	0.002258	1	0.03081	0.3563	26	1103	RUSC1,U2AF2,FABP5,LENG8,FDPS,CGN,MMP9,HSPA2,FAM160B2,COL4A2,MRPL13,CCDC12,NDUFAF6,RIMS2,SOX4,MTSS1,BNC1,NCAPD2,UBE2S,ANKRD28,DNASE1L1,DDR1,PINLYP,SH3D21,IFNLR1,ATG12
Pubmed	26002917	The matricellular protein CCN1 controls retinal angiogenesis by targeting VEGF, Src homology 2 domain phosphatase-1 and Notch signaling.	Pubmed	0.002317	1	0.03081	0.3563	3	21	RASIP1,PTPN6,HEY1
Pubmed	23948231	Sox2 modulates the function of two distinct cell lineages in mouse skin.	Pubmed	0.002317	1	0.03081	0.3563	3	21	ITGA8,CACNA1A,KRT8
Pubmed	26582913	Phosphorylation of the chromatin remodeling factor DPF3a induces cardiac hypertrophy through releasing HEY repressors from DNA.	Pubmed	0.002317	1	0.03081	0.3563	3	21	CSNK2A1,CSNK2B,HEY1
Pubmed	22916088	Transcriptional programs controlling perinatal lung maturation.	Pubmed	0.002317	1	0.03081	0.3563	3	21	CBX3,FABP5,PON1
Pubmed	25249183	Genome-wide association study in Chinese identifies novel loci for blood pressure and hypertension.	Pubmed	0.002317	1	0.03081	0.3563	3	21	CYP21A2,ULK4,TNXB
Pubmed	25249463	Involvement of Wnt, Eda and Shh at defined stages of sweat gland development.	Pubmed	0.002317	1	0.03081	0.3563	3	21	NOG,CTNNB1,KRT8
Pubmed	24583262	Ephrin-B2 governs morphogenesis of endolymphatic sac and duct epithelia in the mouse inner ear.	Pubmed	0.002317	1	0.03081	0.3563	3	21	EPHB2,CA2,HEY1
Pubmed	17403899	CIF-1, a shared subunit of the COP9/signalosome and eukaryotic initiation factor 3 complexes, regulates MEL-26 levels in the Caenorhabditis elegans embryo.	Pubmed	0.002317	1	0.03081	0.3563	3	21	EIF3H,EIF3E,COPS7A
Pubmed	19240061	Coeliac disease-associated risk variants in TNFAIP3 and REL implicate altered NF-kappaB signalling.	Pubmed	0.002324	1	0.03081	0.3563	10	265	CHCHD6,ZHX2,CREB5,IL16,MYH13,ZNF236,IL22RA2,COBL,NPY,IFNLR1
Pubmed	17366345	Potential genetic variants in schizophrenia: a Bayesian analysis.	Pubmed	0.002358	1	0.03081	0.3563	2	6	NPY,DRD2
Pubmed	11991719	Cloning and characterization of a novel apolipoprotein A-I binding protein, AI-BP, secreted by cells of the kidney proximal tubules in response to HDL or ApoA-I.	Pubmed	0.002358	1	0.03081	0.3563	2	6	APOA1,APOC1
Pubmed	7594541	Mouse lymphotoxin-beta receptor. Molecular genetics, ligand binding, and expression.	Pubmed	0.002358	1	0.03081	0.3563	2	6	GNB3,TNFRSF1A
Pubmed	17762867	The NECAP PHear domain increases clathrin accessory protein binding potential.	Pubmed	0.002358	1	0.03081	0.3563	2	6	NECAP1,SNAP91
Pubmed	11342557	HSP22, a new member of the small heat shock protein superfamily, interacts with mimic of phosphorylated HSP27 ((3D)HSP27).	Pubmed	0.002358	1	0.03081	0.3563	2	6	CSNK2A1,HSPB8
Pubmed	19717274	Genetic, personality, and environmental predictors of drug use in adolescents.	Pubmed	0.002358	1	0.03081	0.3563	2	6	SLC6A3,DRD2
Pubmed	14500659	Receptor activator of NF-kappa B ligand stimulates recruitment of SHP-1 to the complex containing TNFR-associated factor 6 that regulates osteoclastogenesis.	Pubmed	0.002358	1	0.03081	0.3563	2	6	NR0B2,PTPN6
Pubmed	7956345	Assignment of five loci from human chromosome 8q onto sheep chromosome 9.	Pubmed	0.002358	1	0.03081	0.3563	2	6	CYP11B2,CA2
Pubmed	15094788	Tourette syndrome and dopaminergic genes: a family-based association study in the French Canadian founder population.	Pubmed	0.002358	1	0.03081	0.3563	2	6	SLC6A3,DRD2
Pubmed	19036974	Disruption of Nectin-like 1 cell adhesion molecule leads to delayed axonal myelination in the CNS.	Pubmed	0.002358	1	0.03081	0.3563	2	6	CADM4,MBP
Pubmed	11025203	Isolation and characterization of AINT: a novel ARNT interacting protein expressed during murine embryonic development.	Pubmed	0.002358	1	0.03081	0.3563	2	6	TACC3,ARNT
Pubmed	23209807	TBK1 kinase addiction in lung cancer cells is mediated via autophagy of Tax1bp1/Ndp52 and non-canonical NF-?B signalling.	Pubmed	0.002358	1	0.03081	0.3563	2	6	GABARAP,TAX1BP1
Pubmed	27120157	Molecular mechanism of APC/C activation by mitotic phosphorylation.	Pubmed	0.002358	1	0.03081	0.3563	2	6	UBE2S,UBE2C
Pubmed	24842889	Genome-wide mapping of IBD segments in an Ashkenazi PD cohort identifies associated haplotypes.	Pubmed	0.002358	1	0.03081	0.3563	2	6	CNTN1,GBA
Pubmed	21033077	[Correlation of metabolic syndrome clinical signs and genetic determinants at children with obese].	Pubmed	0.002358	1	0.03081	0.3563	2	6	APOA1,APOE
Pubmed	20093499	Arhgef1 regulates alpha5beta1 integrin-mediated matrix metalloproteinase expression and is required for homeostatic lung immunity.	Pubmed	0.002358	1	0.03081	0.3563	2	6	MMP9,ARHGEF1
Pubmed	21983963	Distinct stem cells contribute to mammary gland development and maintenance.	Pubmed	0.002358	1	0.03081	0.3563	2	6	KRT5,KRT8
Pubmed	11827172	A surface plasmon resonance study of the interactions between the component subunits of protein kinase CK2 and two protein substrates, casein and calmodulin.	Pubmed	0.002358	1	0.03081	0.3563	2	6	CSNK2A1,CSNK2B
Pubmed	14561767	HIV-1 Vpu sequesters beta-transducin repeat-containing protein (betaTrCP) in the cytoplasm and provokes the accumulation of beta-catenin and other SCFbetaTrCP substrates.	Pubmed	0.002358	1	0.03081	0.3563	2	6	CTNNB1,CD4
Pubmed	17225991	Antipsychotic-induced extrapyramidal symptoms in patients with schizophrenia: associations with dopamine and serotonin receptor and transporter polymorphisms.	Pubmed	0.002358	1	0.03081	0.3563	2	6	SLC6A3,DRD2
Pubmed	9837978	Growth hormone stimulates the formation of a multiprotein signaling complex involving p130(Cas) and CrkII. Resultant activation of c-Jun N-terminal kinase/stress-activated protein kinase (JNK/SAPK).	Pubmed	0.002358	1	0.03081	0.3563	2	6	SHC1,PTK2
Pubmed	9659899	The discoidin domain receptor tyrosine kinases are activated by collagen.	Pubmed	0.002358	1	0.03081	0.3563	2	6	SHC1,DDR1
Pubmed	19470755	Cdo binds Abl to promote p38alpha/beta mitogen-activated protein kinase activity and myogenic differentiation.	Pubmed	0.002358	1	0.03081	0.3563	2	6	MBP,SPAG9
Pubmed	16356933	Control of MEF2 transcriptional activity by coordinated phosphorylation and sumoylation.	Pubmed	0.002358	1	0.03081	0.3563	2	6	MEF2D,HDAC9
Pubmed	11171287	Common genetic variants that relate to disorders of lipid transport in Spanish subjects with premature coronary artery disease.	Pubmed	0.002358	1	0.03081	0.3563	2	6	APOA1,APOE
Pubmed	23584070	Intrahepatic myeloid-cell aggregates enable local proliferation of CD8(+) T cells and successful immunotherapy against chronic viral liver infection.	Pubmed	0.002358	1	0.03081	0.3563	2	6	CD86,TNFRSF1A
Pubmed	19213727	Wnt11 promotes osteoblast maturation and mineralization through R-spondin 2.	Pubmed	0.002358	1	0.03081	0.3563	2	6	RSPO2,CTNNB1
Pubmed	9537422	Mapping a gene for combined hyperlipidaemia in a mutant mouse strain.	Pubmed	0.002358	1	0.03081	0.3563	2	6	FDPS,ARNT
Pubmed	19534808	Lipoprotein lipase activity and mass, apolipoprotein C-II mass and polymorphisms of apolipoproteins E and A5 in subjects with prior acute hypertriglyceridaemic pancreatitis.	Pubmed	0.002358	1	0.03081	0.3563	2	6	APOC2,APOE
Pubmed	17786215	The N-Myc down regulated Gene1 (NDRG1) Is a Rab4a effector involved in vesicular recycling of E-cadherin.	Pubmed	0.002358	1	0.03081	0.3563	2	6	RABAC1,APOA1
Pubmed	25446897	Dissecting the tumor myeloid compartment reveals rare activating antigen-presenting cells critical for T cell immunity.	Pubmed	0.002358	1	0.03081	0.3563	2	6	CSF3R,CX3CR1
Pubmed	18974357	Deletion of Trpm7 disrupts embryonic development and thymopoiesis without altering Mg2+ homeostasis.	Pubmed	0.002358	1	0.03081	0.3563	2	6	KRT5,KRT8
Pubmed	9398846	Urokinase-generated plasmin activates matrix metalloproteinases during aneurysm formation.	Pubmed	0.002358	1	0.03081	0.3563	2	6	MMP9,APOE
Pubmed	21905118	Inhibition of ?-synuclein aggregation by small heat shock proteins.	Pubmed	0.002358	1	0.03081	0.3563	2	6	HSPB6,HSPB8
Pubmed	18034366	Lack of replication of genetic associations with human longevity.	Pubmed	0.002358	1	0.03081	0.3563	2	6	PON1,APOE
Pubmed	8798720	SRPK1 and Clk/Sty protein kinases show distinct substrate specificities for serine/arginine-rich splicing factors.	Pubmed	0.002358	1	0.03081	0.3563	2	6	MBP,U2AF2
Pubmed	23708605	Electron microscopy structure of human APC/C(CDH1)-EMI1 reveals multimodal mechanism of E3 ligase shutdown.	Pubmed	0.002358	1	0.03081	0.3563	2	6	UBE2S,UBE2C
Pubmed	12964943	Genetic study of common variants at the Apo E, Apo AI, Apo CIII, Apo B, lipoprotein lipase (LPL) and hepatic lipase (LIPC) genes and coronary artery disease (CAD): variation in LIPC gene associates with clinical outcomes in patients with established CAD.	Pubmed	0.002358	1	0.03081	0.3563	2	6	APOA1,APOE
Pubmed	12218095	Cutting edge: thymocyte-independent and thymocyte-dependent phases of epithelial patterning in the fetal thymus.	Pubmed	0.002358	1	0.03081	0.3563	2	6	KRT5,KRT8
Pubmed	18439548	Loci related to metabolic-syndrome pathways including LEPR,HNF1A, IL6R, and GCKR associate with plasma C-reactive protein: the Women's Genome Health Study.	Pubmed	0.002358	1	0.03081	0.3563	2	6	APOE,IL6R
Pubmed	12145206	Binding of FGF-1 variants to protein kinase CK2 correlates with mitogenicity.	Pubmed	0.002358	1	0.03081	0.3563	2	6	CSNK2A1,CSNK2B
Pubmed	10707984	Piccolo, a presynaptic zinc finger protein structurally related to bassoon.	Pubmed	0.002358	1	0.03081	0.3563	2	6	RABAC1,RIMS2
Pubmed	16884933	Identification of Gnr1p, a negative regulator of G alpha signalling in Schizosaccharomyces pombe, and its complementation by human G beta subunits.	Pubmed	0.002358	1	0.03081	0.3563	2	6	GNB3,GNB4
Pubmed	22442009	Coding exons function as tissue-specific enhancers of nearby genes.	Pubmed	0.002358	1	0.03081	0.3563	2	6	TWIST1,HDAC9
Pubmed	11583622	Phosphorylation of bid by casein kinases I and II regulates its cleavage by caspase 8.	Pubmed	0.002358	1	0.03081	0.3563	2	6	CSNK2A1,CSNK2B
Pubmed	22542183	De novo gene disruptions in children on the autistic spectrum.	Pubmed	0.002358	1	0.03081	0.3563	2	6	LMTK3,CIC
Pubmed	10825153	Calcium regulates transcriptional repression of myocyte enhancer factor 2 by histone deacetylase 4.	Pubmed	0.002358	1	0.03081	0.3563	2	6	MEF2D,HDAC9
Pubmed	10706119	APRIL/TRDL-1, a tumor necrosis factor-like ligand, stimulates cell death.	Pubmed	0.002358	1	0.03081	0.3563	2	6	TNFRSF11B,TNFRSF1A
Pubmed	19050235	Cutting edge: thymic crosstalk regulates delta-like 4 expression on cortical epithelial cells.	Pubmed	0.002358	1	0.03081	0.3563	2	6	KRT5,KRT8
Pubmed	19620969	A regulatory pathway involving Notch1/beta-catenin/Isl1 determines cardiac progenitor cell fate.	Pubmed	0.002358	1	0.03081	0.3563	2	6	MYOCD,CTNNB1
Pubmed	15681612	Frat is dispensable for canonical Wnt signaling in mammals.	Pubmed	0.002358	1	0.03081	0.3563	2	6	EPHB2,CTNNB1
Pubmed	10328888	beta subunit reshuffling modifies N- and P/Q-type Ca2+ channel subunit compositions in lethargic mouse brain.	Pubmed	0.002358	1	0.03081	0.3563	2	6	CACNA1A,CACNA1B
Pubmed	18428024	Urinary matrix metalloproteinase -8, -9, -14 and their regulators (TRY-1, TRY-2, TATI) in patients with diabetic nephropathy.	Pubmed	0.002358	1	0.03081	0.3563	2	6	MMP9,PRSS1
Pubmed	28820283	N-3 PUFAs induce inflammatory tolerance by formation of KEAP1-containing SQSTM1/p62-bodies and activation of NFE2L2.	Pubmed	0.002358	1	0.03081	0.3563	2	6	TAX1BP1,GNB4
Pubmed	8806671	Phosphorylation of HIV-1 Rev protein: implication of protein kinase CK2 and pro-directed kinases.	Pubmed	0.002358	1	0.03081	0.3563	2	6	CSNK2A1,CSNK2B
Pubmed	18690118	Dopamine and opioid gene variants are associated with increased smoking reward and reinforcement owing to negative mood.	Pubmed	0.002358	1	0.03081	0.3563	2	6	SLC6A3,DRD2
Pubmed	12692552	Mutations in a Sar1 GTPase of COPII vesicles are associated with lipid absorption disorders.	Pubmed	0.002358	1	0.03081	0.3563	2	6	APOA1,APOA4
Pubmed	26278035	Wt1 and ?-catenin cooperatively regulate diaphragm development in the mouse.	Pubmed	0.002358	1	0.03081	0.3563	2	6	TWIST1,CTNNB1
Pubmed	17466074	Genetic polymorphisms in dopamine-related genes and smoking cessation in women: a prospective cohort study.	Pubmed	0.002358	1	0.03081	0.3563	2	6	SLC6A3,DRD2
Pubmed	10860780	The ins and outs of a polyglutamine neurodegenerative disease: spinocerebellar ataxia type 1 (SCA1).	Pubmed	0.002358	1	0.03081	0.3563	2	6	ATXN1,CACNA1A
Pubmed	15470047	Loss of SHIP and CIS recruitment to the granulocyte colony-stimulating factor receptor contribute to hyperproliferative responses in severe congenital neutropenia/acute myelogenous leukemia.	Pubmed	0.002358	1	0.03081	0.3563	2	6	SHC1,CSF3R
Pubmed	10951572	The human vaccinia-related kinase 1 (VRK1) phosphorylates threonine-18 within the mdm-2 binding site of the p53 tumour suppressor protein.	Pubmed	0.002358	1	0.03081	0.3563	2	6	CSNK2A1,CSNK2B
Pubmed	11512679	Allele frequencies for candidate genes in atherosclerosis and diabetes among Trinidadian neonates.	Pubmed	0.002358	1	0.03081	0.3563	2	6	PON1,APOE
Pubmed	12121677	An unequal crossover event in RCCX modules of the human MHC resulting in the formation of a TNXB/TNXA hybrid and deletion of the CYP21A.	Pubmed	0.002358	1	0.03081	0.3563	2	6	CYP21A2,TNXB
Pubmed	16983341	Matriptase inhibition by hepatocyte growth factor activator inhibitor-1 is essential for placental development.	Pubmed	0.002358	1	0.03081	0.3563	2	6	CTNNB1,ST14
Pubmed	12429732	TAB1beta (transforming growth factor-beta-activated protein kinase 1-binding protein 1beta ), a novel splicing variant of TAB1 that interacts with p38alpha but not TAK1.	Pubmed	0.002358	1	0.03081	0.3563	2	6	MBP,MAPK12
Pubmed	27756203	Mice lacking the conserved transcription factor Grainyhead-like 3 (Grhl3) display increased apposition of the frontal and parietal bones during embryonic development.	Pubmed	0.002358	1	0.03081	0.3563	2	6	NOG,TWIST1
Pubmed	18580852	Clinical and molecular-genetic markers of ADHD in children.	Pubmed	0.002358	1	0.03081	0.3563	2	6	SLC6A3,DRD2
Pubmed	22301152	The human immunodeficiency virus type 1 Nef and Vpu proteins downregulate the natural killer cell-activating ligand PVR.	Pubmed	0.002358	1	0.03081	0.3563	2	6	PVR,CD4
Pubmed	16424823	Genetic susceptibility to tardive dyskinesia among schizophrenia subjects: IV. Role of dopaminergic pathway gene polymorphisms.	Pubmed	0.002358	1	0.03081	0.3563	2	6	SLC6A3,DRD2
Pubmed	23306155	Derlin-1 is overexpressed in non-small cell lung cancer and promotes cancer cell invasion via EGFR-ERK-mediated up-regulation of MMP-2 and MMP-9.	Pubmed	0.002358	1	0.03081	0.3563	2	6	MMP9,DERL1
Pubmed	19822757	Identification of a physiological E2 module for the human anaphase-promoting complex.	Pubmed	0.002358	1	0.03081	0.3563	2	6	UBE2S,UBE2C
Pubmed	9238069	Direct interaction of gbetagamma with a C-terminal gbetagamma-binding domain of the Ca2+ channel alpha1 subunit is responsible for channel inhibition by G protein-coupled receptors.	Pubmed	0.002358	1	0.03081	0.3563	2	6	CACNA1A,CACNA1B
Pubmed	12769847	Phosphorylation of the WASP-VCA domain increases its affinity for the Arp2/3 complex and enhances actin polymerization by WASP.	Pubmed	0.002358	1	0.03081	0.3563	2	6	CSNK2A1,CSNK2B
Pubmed	20439735	SIRT1 regulates Dishevelled proteins and promotes transient and constitutive Wnt signaling.	Pubmed	0.002358	1	0.03081	0.3563	2	6	CSNK2A1,CTNNB1
Pubmed	26195802	Spontaneous retrotransposon insertion into TNF 3'UTR causes heart valve disease and chronic polyarthritis.	Pubmed	0.002358	1	0.03081	0.3563	2	6	CD79A,TNFRSF1A
Pubmed	19170762	Bone morphogenetic protein-2 enhances Wnt/beta-catenin signaling-induced osteoprotegerin expression.	Pubmed	0.002358	1	0.03081	0.3563	2	6	CTNNB1,TNFRSF11B
Pubmed	11096062	The human homolog of Saccharomyces cerevisiae Apg7p is a Protein-activating enzyme for multiple substrates including human Apg12p, GATE-16, GABARAP, and MAP-LC3.	Pubmed	0.002358	1	0.03081	0.3563	2	6	GABARAP,ATG12
Pubmed	22948227	MAPK15/ERK8 stimulates autophagy by interacting with LC3 and GABARAP proteins.	Pubmed	0.002358	1	0.03081	0.3563	2	6	GABARAP,GABARAPL1
Pubmed	19355789	Impaired antibody response causes persistence of prototypic T cell-contained virus.	Pubmed	0.002358	1	0.03081	0.3563	2	6	AICDA,C4A
Pubmed	19403283	APOE, CETP and LPL genes show strong association with lipid levels in Greek children.	Pubmed	0.002358	1	0.03081	0.3563	2	6	APOA4,APOE
Pubmed	21400497	Polycomb group gene Bmi1 plays a role in the growth of thymic epithelial cells.	Pubmed	0.002358	1	0.03081	0.3563	2	6	KRT5,KRT8
Pubmed	15671067	Characterization of human epiplakin: RNAi-mediated epiplakin depletion leads to the disruption of keratin and vimentin IF networks.	Pubmed	0.002358	1	0.03081	0.3563	2	6	KRT5,KRT8
Pubmed	18325076	Genetic profile of ischemic cerebrovascular disease and carotid stenosis.	Pubmed	0.002358	1	0.03081	0.3563	2	6	APOE,GNB3
Pubmed	16949566	Identification of a novel population of adrenal-like cells in the mammalian testis.	Pubmed	0.002358	1	0.03081	0.3563	2	6	CYP11B2,CYP21A2
Pubmed	22034973	Opposite function of dopamine D1 and N-methyl-D-aspartate receptors in striatal cannabinoid-mediated signaling.	Pubmed	0.002358	1	0.03081	0.3563	2	6	SLC6A3,DRD2
Pubmed	20394740	Interaction of common sequence variants and selected risk factors in determination of HDL cholesterol levels.	Pubmed	0.002358	1	0.03081	0.3563	2	6	APOA1,APOE
Pubmed	18188752	Interactions between genotype and retrospective ADHD symptoms predict lifetime smoking risk in a sample of young adults.	Pubmed	0.002358	1	0.03081	0.3563	2	6	SLC6A3,DRD2
Pubmed	15657615	Polymorphisms in APOA1 and LPL genes are statistically independently associated with fasting TG in men with CAD.	Pubmed	0.002358	1	0.03081	0.3563	2	6	APOA1,APOE
Pubmed	25504990	Engineering high-potency R-spondin adult stem cell growth factors.	Pubmed	0.002358	1	0.03081	0.3563	2	6	RSPO2,RSPO1
Pubmed	29973370	Two distinct ontogenies confer heterogeneity to mouse brain microglia.	Pubmed	0.002358	1	0.03081	0.3563	2	6	AIF1,CX3CR1
Pubmed	17001306	Novel role of WD40 and SOCS box protein-2 in steady-state distribution of granulocyte colony-stimulating factor receptor and G-CSF-controlled proliferation and differentiation signaling.	Pubmed	0.002358	1	0.03081	0.3563	2	6	SHC1,CSF3R
Pubmed	11265645	Wnt signaling is required for thymocyte development and activates Tcf-1 mediated transcription.	Pubmed	0.002358	1	0.03081	0.3563	2	6	FZD7,CTNNB1
Pubmed	15138483	Association of NQO1 polymorphism with spontaneous breast cancer in two independent populations.	Pubmed	0.002358	1	0.03081	0.3563	2	6	APOE,GNB3
Pubmed	19497282	Wnt7a activates the planar cell polarity pathway to drive the symmetric expansion of satellite stem cells.	Pubmed	0.002358	1	0.03081	0.3563	2	6	FZD7,CTNNB1
Pubmed	18086875	The atypical Rho GTPase Wrch1 collaborates with the nonreceptor tyrosine kinases Pyk2 and Src in regulating cytoskeletal dynamics.	Pubmed	0.002358	1	0.03081	0.3563	2	6	NCK2,PTK2
Pubmed	18594950	Gene targeting of CK2 catalytic subunits.	Pubmed	0.002358	1	0.03081	0.3563	2	6	CSNK2A1,CSNK2B
Pubmed	25849774	Niche-induced cell death and epithelial phagocytosis regulate hair follicle stem cell pool.	Pubmed	0.002358	1	0.03081	0.3563	2	6	CTNNB1,CX3CR1
Pubmed	8104872	Linkage relationships between ALPL, ENO1, GPI, PGD, and TGFB1 on porcine chromosome 6.	Pubmed	0.002358	1	0.03081	0.3563	2	6	APOE,LIPE
Pubmed	24225776	Structural and molecular basis of ZNRF3/RNF43 transmembrane ubiquitin ligase inhibition by the Wnt agonist R-spondin.	Pubmed	0.002358	1	0.03081	0.3563	2	6	RSPO2,RSPO1
Pubmed	20018672	VGLUT2 in dopamine neurons is required for psychostimulant-induced behavioral activation.	Pubmed	0.002358	1	0.03081	0.3563	2	6	SLC6A3,DRD2
Pubmed	22889670	Cerebrospinal fluid biomarkers of neuropathologically diagnosed Parkinson's disease subjects.	Pubmed	0.002358	1	0.03081	0.3563	2	6	APOA1,APOE
[truncated: 44,204 more rows]

## Sheet: Interaction
Category	ID	Name	Source	p-value	q-value Bonferroni	q-value FDR B&H	q-value FDR B&Y	Hit Count in Query List	Hit Count in Genome	Hit in Query List

## Sheet: Cytoband
Category	ID	Name	Source	p-value	q-value Bonferroni	q-value FDR B&H	q-value FDR B&Y	Hit Count in Query List	Hit Count in Genome	Hit in Query List
[truncated: 31 more rows]

[truncated: 6 more sheets: TF Binding Site, Gene Family, Co-expression, MiRNA, Disease & Drug, Computational]
